# Supplementary material for: Differential expression of lysine acetylation proteins in gastric cancer treated with a new antitumor agent bioactive peptide chelate selenium
Source: PeerJ. 2023 Jan 17;11:e14384. doi: 10.7717/peerj.14384 (PMC9854375; doi:10.7717/peerj.14384)
Supplement: Supplemental Information 7 — MS identified information [file peerj-11-14384-s007.xlsx]

## Sheet: Summary
Header line description of table 1			Table 1. MS/MS spectrum database search analysis summary
Total spectrum	Number of spectrum produced by mass spectrometer
Matched spectrum	Number of spectrum matched with alignment protein		Total spectrum	Matched spectrum	Peptides	Modified peptides	Identified proteins	Quantifiable proteins	Identified sites	Quantifiable sites
Peptides	Number of peptides which spectrum hit		57329	9262 (16.2%)	5604	4874	1926	1777	4958	4467
Modified peptides	Total number of modified peptides identified
Identified proteins	Number of proteins detected by spectrum search analysis
Quantifiable proteins	Number of proteins quantifiable		Table 2. Differentially modified modification sites (modified proteins) summary (Filtered with threshold value of expression fold change and P value<0.05)
Identified sites	Number of modification sites detected by spectrum search analysis
Quantifiable sites	Number of modification sites quantifiable		Compare group	Regulated type	fold change >1.2	fold change >1.3	fold change >1.5	fold change >2
			MKN_45S/MKN_45C	up-regulated	1006 (654)	638 (457)	297 (238)	104 (87)
Header line description of worksheet "Site_quant"				down-regulated	1138 (751)	931 (647)	665 (499)	336 (275)
Protein accession	Protein accession number of database used for search
Position	Modification site localization in protein
Amino acid	The amino acid that modification site modified
Protein description	Protein functional description
Gene name	Indicates the name of the gene that code for the protein sequence
Localization probability	Probability of a certain amino acid containing this modification in this peptide
PEP	The maximal posterior error probability for peptides
Score	A simple rule to be used to judge whether a result is significant or not
Modified sequence	Identified peptide sequence marked with modification sites localization probabilities
Charge	Carried charge of peptide
Mass error [ppm]	Parts per million ratio of peptide mass error between the theory and practice
MS/MS Count	Number of spectrum matched with peptide
Header line description of worksheet "peptide_quant"
ID	Identified peptide index number
Sequence	Identified peptide amino acid sequence
Length	Identified peptide amino acid length
Modifications	identified peptide with modification markers
Modified sequence	Identified peptide sequence marked with modification sites localization probabilities
Protein accession	Protein accession number of database used for search
Protein description	Protein functional description
Charge	Carried charge of peptide
m/z	Mass-to-charge ratio of peptide
Mass error [ppm]	Parts per million ratio of peptide mass error between the theory and practice
PEP	The maximal posterior error probability for peptides
Score	A simple rule to be used to judge whether a result is significant or not
MS/MS Count	Number of spectrum matched with peptide

## Sheet: Site_quant
Protein accession	Position	Amino acid	Protein description	Gene name	Localization probability	PEP	Score	Modified sequence	Charge	Mass error [ppm]	MS/MS Count	MKN_45C1	MKN_45C2	MKN_45C3	MKN_45S1	MKN_45S2	MKN_45S3	MKN_45S/MKN_45C Ratio	MKN_45S/MKN_45C P value
A0A024RBG1	134	K	Diphosphoinositol polyphosphate phosphohydrolase NUDT4B OS=Homo sapiens OX=9606 GN=NUDT4B PE=3 SV=1	NUDT4B	1	2.50792e-08	107.35	VLQCHK(1)PVHAEYLEK	4	-0.64731	1	1.403	1.355	1.376	0.694	0.76	0.797	0.545	0.000124527
A0AV96	264	K	RNA-binding protein 47 OS=Homo sapiens OX=9606 GN=RBM47 PE=1 SV=2	RBM47	1	0.00520154	61.265	K(1)SFGQFNPGCVER	2	-0.70836	1	1.34	1.412	1.35	0.809	0.698	0.77	0.555	0.00021955
A0AV96	54	K	RNA-binding protein 47 OS=Homo sapiens OX=9606 GN=RBM47 PE=1 SV=2	RBM47	1	0.000312691	64.565	K(1)YGGPPPGWEGPHPQR	3	-0.51528	1	0.996	1.039	1.091	0.903	1.002	1.02	0.936	0.2197
A0AVT1	709	K	Ubiquitin-like modifier-activating enzyme 6 OS=Homo sapiens OX=9606 GN=UBA6 PE=1 SV=1	UBA6	1	0.00143095	95.502	FEK(1)YFNHK	3	-2.0117	1	1.045	1.063	1.043	0.887	0.971	1.05	0.923	0.23468
A0AVT1	519	K	Ubiquitin-like modifier-activating enzyme 6 OS=Homo sapiens OX=9606 GN=UBA6 PE=1 SV=1	UBA6	1	0.00223852	89.55	PHHIQK(1)PK	3	-0.76548	1
A0FGR8	200	K	Extended synaptotagmin-2 OS=Homo sapiens OX=9606 GN=ESYT2 PE=1 SV=1	ESYT2	1	0.00952479	59.067	AEWLNK(1)TVK	3	0.13914	1	0.899	0.962	0.915	0.985	1.089	1.088	1.139	0.029356
A0FGR8	659	K	Extended synaptotagmin-2 OS=Homo sapiens OX=9606 GN=ESYT2 PE=1 SV=1	ESYT2	1	0.0078453	85.265	VLHLEK(1)R	3	-0.90735	1	1.105	1.012	0.895	1.074	1.027	0.92	1.003	0.9549
A0FGR8	574	K	Extended synaptotagmin-2 OS=Homo sapiens OX=9606 GN=ESYT2 PE=1 SV=1	ESYT2	1	0.0173244	77.318	AQESK(1)IR	2	1.3992	1
A0MZ66	158	K	Shootin-1 OS=Homo sapiens OX=9606 GN=SHTN1 PE=1 SV=4	SHTN1	1	0.00390969	65.179	DQIVSVQEEK(1)K	3	-0.32632	1
A0MZ66	286	K	Shootin-1 OS=Homo sapiens OX=9606 GN=SHTN1 PE=1 SV=4	SHTN1	1	0.00325738	83.206	IQHQQK(1)VK	3	0.91093	1	0.931	0.965	1.187	1.065	0.909	0.987	0.96	0.70018
A0MZ66	330	K	Shootin-1 OS=Homo sapiens OX=9606 GN=SHTN1 PE=1 SV=4	SHTN1	1	0.00369213	84.882	YQNSEEK(1)AR	2	0.56079	1	0.811	0.754	0.841	1.15	1.117	1.151	1.421	0.00046416
A0MZ66	335	K	Shootin-1 OS=Homo sapiens OX=9606 GN=SHTN1 PE=1 SV=4	SHTN1	1	0.000131006	92.247	NLK(1)HSVDELQK	3	0.31194	1	0.98	0.911	1.039	0.992	1.044	1.026	1.045	0.3301
A2RU30	435	K	Protein TESPA1 OS=Homo sapiens OX=9606 GN=TESPA1 PE=1 SV=2	TESPA1	1	0.0315075	45.394	RK(1)SRARK	3	2.3155	1	1.219	1.163	1.193	0.906	0.854	0.872	0.736	0.000157217
A5YKK6	599	K	CCR4-NOT transcription complex subunit 1 OS=Homo sapiens OX=9606 GN=CNOT1 PE=1 SV=2	CNOT1	1	0.0242953	59.84	LDK(1)WLTDK	2	-0.98881	1
A6NDY0	182	K	Embryonic polyadenylate-binding protein 2 OS=Homo sapiens OX=9606 GN=PABPN1L PE=2 SV=1	PABPN1L	1	7.39764e-05	91.62	VTILCDK(1)FSGHPK	4	-0.42681	2	1.169	1.215	1.164	0.904	0.9	0.846	0.747	0.00032266
A6NF01	37	K	Putative nuclear envelope pore membrane protein POM 121B OS=Homo sapiens OX=9606 GN=POM121B PE=5 SV=2	POM121B	1	0.0327343	43.958	SQTPERPAK(1)K	3	-0.48621	1	0.831	0.793	0.914	1.121	1.087	1.121	1.312	0.0031608
A6NFK2	11	K	Glutaredoxin domain-containing cysteine-rich protein 2 OS=Homo sapiens OX=9606 GN=GRXCR2 PE=3 SV=1	GRXCR2	1	0.025517	51.346	LNQK(1)SDGK	3	-3.1551	1	0.409	0.47	0.386	1.445	1.379	1.364	3.311	3.973e-05
A6NHR9	1349	K	Structural maintenance of chromosomes flexible hinge domain-containing protein 1 OS=Homo sapiens OX=9606 GN=SMCHD1 PE=1 SV=2	SMCHD1	1	0.00369149	52.891	AIYNK(1)SIIEGPIIK	3	-2.2988	1
A6NHR9	569	K	Structural maintenance of chromosomes flexible hinge domain-containing protein 1 OS=Homo sapiens OX=9606 GN=SMCHD1 PE=1 SV=2	SMCHD1	1	0.00714345	72.928	DCHEK(1)YDK	3	3.8917	1	1.61	1.654	1.43	0.645	0.636	0.6	0.401	5.6202e-05
A6NJ78	230	K	Probable methyltransferase-like protein 15 OS=Homo sapiens OX=9606 GN=METTL15 PE=1 SV=1	METTL15	1	0.0316417	43.308	TYGEEK(1)HAK	3	-0.35343	1	0.848	0.945	0.956	1.054	0.974	1.153	1.157	0.079162
A8TX70	98	K	Collagen alpha-5(VI) chain OS=Homo sapiens OX=9606 GN=COL6A5 PE=1 SV=1	COL6A5	1	0.0167639	43.897	GRSPMLNHLK(1)K	3	-1.9399	1	1.102	1.157	1.174	0.925	0.844	0.955	0.793	0.0050789
E7EU14	49	K	Protein PPP5D1 OS=Homo sapiens OX=9606 GN=PPP5D1 PE=2 SV=2	PPP5D1	1	0.00142856	103.08	YQECNK(1)IVK	2	0.076967	1	1.516	1.481	1.597	0.652	0.648	0.644	0.423	0.00068444
E7EU14	66	K	Protein PPP5D1 OS=Homo sapiens OX=9606 GN=PPP5D1 PE=2 SV=2	PPP5D1	1	0.000430109	111.46	AIAGDEHK(1)R	3	0.9467	1	0.73	0.833	0.822	1.056	1.326	1.045	1.437	0.0154177
E7EU14	43	K	Protein PPP5D1 OS=Homo sapiens OX=9606 GN=PPP5D1 PE=2 SV=2	PPP5D1	1	0.00551029	78.77	MK(1)YQECNK	3	-0.31942	4	1.547	1.473	1.523	0.661	0.667	0.653	0.436	3.8426e-07
L0R6Q1	12	K	SLC35A4 upstream open reading frame protein OS=Homo sapiens OX=9606 GN=SLC35A4 PE=3 SV=1	SLC35A4	1	0.0111062	85.355	LK(1)DLAFLK	2	-0.31419	1	0.685	0.722	0.594	1.218	1.194	1.276	1.843	0.00056254
M0R2J8	287	K	Doublecortin domain-containing protein 1 OS=Homo sapiens OX=9606 GN=DCDC1 PE=1 SV=1	DCDC1	1	0.0230154	41.48	MK(1)K(1)LTERTSVR	2	1.7144	1	0.364	0.393	0.361	1.386	1.44	1.456	3.83	8.3503e-07
M0R2J8	288	K	Doublecortin domain-containing protein 1 OS=Homo sapiens OX=9606 GN=DCDC1 PE=1 SV=1	DCDC1	1	0.0230154	41.48	MK(1)K(1)LTERTSVR	2	1.7144	1	0.364	0.393	0.361	1.386	1.44	1.456	3.83	8.3503e-07
O00116	347	K	Alkyldihydroxyacetonephosphate synthase, peroxisomal OS=Homo sapiens OX=9606 GN=AGPS PE=1 SV=1	AGPS	1	0.000133612	100.38	GIIEK(1)SCQGPR	2	-0.91163	1	1.236	1.306	1.292	0.844	0.788	0.824	0.641	7.5316e-05
O00148	190	K	ATP-dependent RNA helicase DDX39A OS=Homo sapiens OX=9606 GN=DDX39A PE=1 SV=2	DDX39A	1	0.000186972	89.43	NVK(1)HFVLDECDK	4	-1.9148	2	0.925	0.953	0.895	1.091	1.046	1.037	1.145	0.0048767
O00148	162	K	ATP-dependent RNA helicase DDX39A OS=Homo sapiens OX=9606 GN=DDX39A PE=1 SV=2	DDX39A	1	0.0016475	62.162	K(1)NCPHVVVGTPGR	3	-0.6174	1	1.259	1.127	1.106	0.914	0.908	0.872	0.771	0.0038831
O00148	187	K	ATP-dependent RNA helicase DDX39A OS=Homo sapiens OX=9606 GN=DDX39A PE=1 SV=2	DDX39A	1	0.00816879	90.15	SFSLK(1)NVK	3	-1.6218	2	1.028	1.027	1.032	0.942	0.949	1.063	0.957	0.36422
O00151	246	K	PDZ and LIM domain protein 1 OS=Homo sapiens OX=9606 GN=PDLIM1 PE=1 SV=4	PDLIM1	1	0.000229456	75.316	APVTK(1)VAASIGNAQK	3	-1.247	1	1.043	1.07	1.011	0.954	0.916	1.06	0.938	0.2302
O00151	294	K	PDZ and LIM domain protein 1 OS=Homo sapiens OX=9606 GN=PDLIM1 PE=1 SV=4	PDLIM1	1	9.67413e-05	66.022	HPECYVCTDCGTNLK(1)QK	3	-1.3955	1	1.309	1.579	1.467	0.737	0.699	0.666	0.483	0.00030086
O00151	309	K	PDZ and LIM domain protein 1 OS=Homo sapiens OX=9606 GN=PDLIM1 PE=1 SV=4	PDLIM1	1	5.54189e-18	141.34	GHFFVEDQIYCEK(1)HAR	4	-0.49144	3	0.907	0.905	0.963	1.053	1.076	1.04	1.142	0.0041849
O00154	267	K	Cytosolic acyl coenzyme A thioester hydrolase OS=Homo sapiens OX=9606 GN=ACOT7 PE=1 SV=3	ACOT7	1	9.26373e-07	70.094	HCK(1)TNIVTASVDAINFHDK	4	-0.40479	1	0.952	1.034	0.987	0.968	1.042	1.022	1.02	0.57668
O00178	565	K	GTP-binding protein 1 OS=Homo sapiens OX=9606 GN=GTPBP1 PE=1 SV=3	GTPBP1	1	0.034186	60.167	TK(1)AVGTITK	2	-0.56959	1	0.722	0.769	0.717	1.19	1.139	1.22	1.607	9.6537e-05
O00186	404	K	Syntaxin-binding protein 3 OS=Homo sapiens OX=9606 GN=STXBP3 PE=1 SV=2	STXBP3	1	0.00128847	80.916	NHDNCDK(1)IR	3	-0.84246	1	1.053	1.015	1.089	0.896	0.964	1.047	0.921	0.163597
O00193	13	K	Small acidic protein OS=Homo sapiens OX=9606 GN=SMAP PE=1 SV=1	SMAP	1	0.00201708	83.998	ESHPHGVK(1)R	2	0.085222	2	0.56	0.583	0.616	1.329	1.34	1.188	2.193	7.988e-05
O00203	386	K	AP-3 complex subunit beta-1 OS=Homo sapiens OX=9606 GN=AP3B1 PE=1 SV=3	AP3B1	1	0.0107819	52.247	STDPTMIK(1)TLK	3	1.65	1	0.915	0.954	1.027	0.996	1.062	1.026	1.065	0.173485
O00203	224	K	AP-3 complex subunit beta-1 OS=Homo sapiens OX=9606 GN=AP3B1 PE=1 SV=3	AP3B1	1	0.0020785	78.098	IDLIHK(1)NYR	3	1.8215	1	0.944	0.975	0.941	1	1.043	1.067	1.087	0.0194787
O00231	295	K	26S proteasome non-ATPase regulatory subunit 11 OS=Homo sapiens OX=9606 GN=PSMD11 PE=1 SV=3	PSMD11	1	0.001407	96.342	CVAQASK(1)NR	2	-0.83892	1	1.327	1.442	1.601	0.681	0.715	0.692	0.478	0.000198007
O00231	417	K	26S proteasome non-ATPase regulatory subunit 11 OS=Homo sapiens OX=9606 GN=PSMD11 PE=1 SV=3	PSMD11	1	0.000794892	90.913	VVDSLYNK(1)AK	3	1.3125	2	0.963	0.976	0.955	1.057	1.02	1.014	1.068	0.0103988
O00232	147	K	26S proteasome non-ATPase regulatory subunit 12 OS=Homo sapiens OX=9606 GN=PSMD12 PE=1 SV=3	PSMD12	1	0.000471047	111.63	LTK(1)TLATIK	3	0.88804	2	1.141	1.204	1.09	0.9	0.899	0.926	0.793	0.00160043
O00232	98	K	26S proteasome non-ATPase regulatory subunit 12 OS=Homo sapiens OX=9606 GN=PSMD12 PE=1 SV=3	PSMD12	1	0.00143596	105.4	SQLK(1)QAVAK	2	0.28703	1	1.064	1.137	1.003	0.936	0.979	0.965	0.899	0.052178
O00232	221	K	26S proteasome non-ATPase regulatory subunit 12 OS=Homo sapiens OX=9606 GN=PSMD12 PE=1 SV=3	PSMD12	1	0.0122982	51.286	FFQEENTEK(1)LK	3	-0.94486	1	0.896	0.917	0.887	1.103	1.044	1.073	1.193	0.00070361
O00244	38	K	Copper transport protein ATOX1 OS=Homo sapiens OX=9606 GN=ATOX1 PE=1 SV=1	ATOX1	1	0.00795683	66.27	YDIDLPNK(1)K	3	0.50383	1	1.164	1.124	1.173	0.96	0.874	0.877	0.783	0.00184071
O00244	60	K	Copper transport protein ATOX1 OS=Homo sapiens OX=9606 GN=ATOX1 PE=1 SV=1	ATOX1	1	0.004833	74.611	TGK(1)TVSYLGLE	2	0.23093	2	1.188	1.023	1.111	0.902	0.935	0.965	0.843	0.023642
O00255	522	K	Menin OS=Homo sapiens OX=9606 GN=MEN1 PE=1 SV=4	MEN1	1	0.0223775	56.177	K(1)PPGTVAGTAR	2	0.46954	1	1.138	1.088	1.054	0.926	0.974	0.931	0.863	0.0058409
O00264	102	K	Membrane-associated progesterone receptor component 1 OS=Homo sapiens OX=9606 GN=PGRMC1 PE=1 SV=3	PGRMC1	1	0.0115594	84.615	VFDVTK(1)GR	2	0.35181	1	0.759	0.889	0.949	1.071	1.04	1.169	1.263	0.034437
O00267	453	K	Transcription elongation factor SPT5 OS=Homo sapiens OX=9606 GN=SUPT5H PE=1 SV=1	SUPT5H	1	0.00471079	59.198	ITIMPK(1)HEDLK	3	0.088346	1	1.114	0.878	0.994	0.976	0.956	1.095	1.014	0.84752
O00273	45	K	DNA fragmentation factor subunit alpha OS=Homo sapiens OX=9606 GN=DFFA PE=1 SV=1	DFFA	1	0.000391933	92.939	SK(1)ACDILAIDK	2	-0.32823	1	1.34	1.395	1.215	0.712	0.862	0.8	0.601	0.00179555
O00299	131	K	Chloride intracellular channel protein 1 OS=Homo sapiens OX=9606 GN=CLIC1 PE=1 SV=4	CLIC1	1	9.72144e-05	87.429	NSNPALNDNLEK(1)GLLK	3	-0.9008	1	1.117	1.042	1.042	0.924	0.984	0.975	0.901	0.026262
O00299	166	K	Chloride intracellular channel protein 1 OS=Homo sapiens OX=9606 GN=CLIC1 PE=1 SV=4	CLIC1	1	3.02602e-14	127.32	K(1)FLDGNELTLADCNLLPK	3	0.41049	1	1.504	1.463	1.365	0.706	0.645	0.77	0.49	0.00025982
O00299	49	K	Chloride intracellular channel protein 1 OS=Homo sapiens OX=9606 GN=CLIC1 PE=1 SV=4	CLIC1	1	1.4974e-06	110.55	GVTFNVTTVDTK(1)R	2	-1.0533	1	1.122	1.157	1.196	0.932	0.923	0.844	0.777	0.0022781
O00299	192	K	Chloride intracellular channel protein 1 OS=Homo sapiens OX=9606 GN=CLIC1 PE=1 SV=4	CLIC1	1	0.0203627	54.982	LHIVQVVCK(1)K	3	-0.39353	1
O00299	135	K	Chloride intracellular channel protein 1 OS=Homo sapiens OX=9606 GN=CLIC1 PE=1 SV=4	CLIC1	1	0.0151923	91.906	GLLK(1)ALK	2	0.25491	1	1.08	1.083	1.065	0.921	0.946	0.995	0.887	0.0065213
O00303	161	K	Eukaryotic translation initiation factor 3 subunit F OS=Homo sapiens OX=9606 GN=EIF3F PE=1 SV=1	EIF3F	1	0.0229627	57.59	NMYELHK(1)K	3	0.46914	1	0.991	0.967	1.029	0.992	1.058	0.977	1.013	0.69
O00330	120	K	Pyruvate dehydrogenase protein X component, mitochondrial OS=Homo sapiens OX=9606 GN=PDHX PE=1 SV=3	PDHX	1	0.000957447	89.301	IVVEEGSK(1)NIR	2	-0.20201	1	1.004	1.037	1.112	0.881	1.012	1.014	0.922	0.21126
O00330	194	K	Pyruvate dehydrogenase protein X component, mitochondrial OS=Homo sapiens OX=9606 GN=PDHX PE=1 SV=3	PDHX	1	4.43408e-15	125.23	NILEK(1)HSLDASQGTATGPR	3	1.0222	1	1.143	0.972	0.976	1.012	1.005	0.947	0.959	0.52888
O00330	491	K	Pyruvate dehydrogenase protein X component, mitochondrial OS=Homo sapiens OX=9606 GN=PDHX PE=1 SV=3	PDHX	1	0.0243049	55.04	SFK(1)ANLENPIR	2	0.42297	1	1.042	1.264	1.059	0.85	0.989	0.927	0.822	0.062735
O00338	96	K	Sulfotransferase 1C2 OS=Homo sapiens OX=9606 GN=SULT1C2 PE=1 SV=1	SULT1C2	1	1.83389e-06	85.937	HPFIEWARPPQPSGVEK(1)AK	4	0.57056	1	1.202	0.999	1.104	0.938	0.913	0.966	0.852	0.048198
O00399	38	K	Dynactin subunit 6 OS=Homo sapiens OX=9606 GN=DCTN6 PE=1 SV=1	DCTN6	1	0.00303868	84.568	TVIHPK(1)AR	3	0.6627	1	1.139	1.124	1.07	0.878	0.944	0.97	0.838	0.0073204
O00399	178	K	Dynactin subunit 6 OS=Homo sapiens OX=9606 GN=DCTN6 PE=1 SV=1	DCTN6	1	0.00486158	67.334	ILPNYHHLK(1)K	4	0.4783	1	0.963	1.065	0.994	1.048	0.988	0.968	0.994	0.88912
O00410	108	K	Importin-5 OS=Homo sapiens OX=9606 GN=IPO5 PE=1 SV=4	IPO5	1	0.0089948	57.008	K(1)VCDIAAELAR	2	-0.013203	1
O00410	806	K	Importin-5 OS=Homo sapiens OX=9606 GN=IPO5 PE=1 SV=4	IPO5	1	3.06323e-06	128.21	LEEHFK(1)NQELR	2	0.16263	2	0.899	0.843	0.863	1.091	1.094	1.099	1.261	0.0065805
O00410	800	K	Importin-5 OS=Homo sapiens OX=9606 GN=IPO5 PE=1 SV=4	IPO5	1	0.0144865	60.91	AK(1)LEEHFK	3	0.47793	1	0.924	1.046	0.974	1.041	0.947	1.064	1.037	0.51614
O00410	963	K	Importin-5 OS=Homo sapiens OX=9606 GN=IPO5 PE=1 SV=4	IPO5	1	2.89347e-14	129.88	TK(1)ENVNATENCISAVGK	3	0.44621	1	1.327	1.351	1.401	0.664	0.773	0.845	0.559	0.00125753
O00422	13	K	Histone deacetylase complex subunit SAP18 OS=Homo sapiens OX=9606 GN=SAP18 PE=1 SV=1	SAP18	1	0.0295986	72.2	VTQEEIK(1)K	2	0.21821	1	1.032	1.063	0.998	0.981	1	0.974	0.955	0.084256
O00423	83	K	Echinoderm microtubule-associated protein-like 1 OS=Homo sapiens OX=9606 GN=EML1 PE=1 SV=3	EML1	1	0.00127687	54.898	GPTK(1)ARPLMQTLPLR	3	3.2905	1	0.583	0.587	0.621	1.249	1.309	1.272	2.138	3.0697e-06
O00429	660	K	Dynamin-1-like protein OS=Homo sapiens OX=9606 GN=DNM1L PE=1 SV=2	DNM1L	1	0.0012185	112.13	K(1)NIQDSVPK	2	0.14512	1	0.98	0.942	0.937	0.937	1.043	1.127	1.087	0.21946
O00429	97	K	Dynamin-1-like protein OS=Homo sapiens OX=9606 GN=DNM1L PE=1 SV=2	DNM1L	1	0.0183266	64.803	FLHTK(1)NK	3	-1.1526	1	0.915	0.875	0.877	1.045	1.112	1.084	1.215	0.00109693
O00429	305	K	Dynamin-1-like protein OS=Homo sapiens OX=9606 GN=DNM1L PE=1 SV=2	DNM1L	1	0.00414701	83.045	DCLPELK(1)TR	2	0.80742	1	0.928	0.971	0.88	1.049	1.087	1.031	1.14	0.0154964
O00459	541	K	Phosphatidylinositol 3-kinase regulatory subunit beta OS=Homo sapiens OX=9606 GN=PIK3R2 PE=1 SV=2	PIK3R2	1	0.0109154	85.666	TK(1)LEQQLR	2	-1.1493	1	1.28	1.316	1.112	0.927	0.802	0.82	0.687	0.0055789
O00461	156	K	Golgi integral membrane protein 4 OS=Homo sapiens OX=9606 GN=GOLIM4 PE=1 SV=1	GOLIM4	1	0.000774171	80.706	QK(1)YLQLQQEK	3	0.91389	1	0.941	0.933	0.918	1.047	1.037	1.074	1.131	0.00063978
O00483	10	K	Cytochrome c oxidase subunit NDUFA4 OS=Homo sapiens OX=9606 GN=NDUFA4 PE=1 SV=1	NDUFA4	1	0.003025	109.71	QIIGQAK(1)K	2	-0.67361	1	1.13	1.083	1.157	0.885	0.966	0.916	0.821	0.0034986
O00487	209	K	26S proteasome non-ATPase regulatory subunit 14 OS=Homo sapiens OX=9606 GN=PSMD14 PE=1 SV=1	PSMD14	1	0.0148175	92.838	K(1)NELEQK	2	0.46659	1	1.06	1.134	1.071	0.833	1.001	0.997	0.867	0.085379
O00487	253	K	26S proteasome non-ATPase regulatory subunit 14 OS=Homo sapiens OX=9606 GN=PSMD14 PE=1 SV=1	PSMD14	1	0.0017762	69.721	EMLELAK(1)NYNK	3	0.5661	1	0.936	0.96	0.955	1.007	1.027	1.08	1.092	0.0167624
O00515	223	K	Ladinin-1 OS=Homo sapiens OX=9606 GN=LAD1 PE=1 SV=2	LAD1	1	0.0429321	74.929	IAVSEK(1)R	2	2.1853	1
O00541	98	K	Pescadillo homolog OS=Homo sapiens OX=9606 GN=PES1 PE=1 SV=1	PES1	1	0.00355552	70.889	AYGK(1)SEWNTVER	2	-1.1751	1	0.847	0.754	0.8	1.229	1.244	0.961	1.43	0.0177048
O00541	49	K	Pescadillo homolog OS=Homo sapiens OX=9606 GN=PES1 PE=1 SV=1	PES1	1	6.6371e-05	107.79	GIYPHEPK(1)HK	4	-0.48522	2	0.946	0.962	0.899	1.019	1.054	1.073	1.121	0.0108207
O00541	68	K	Pescadillo homolog OS=Homo sapiens OX=9606 GN=PES1 PE=1 SV=1	PES1	1	0.00177839	92.611	TFYLIK(1)DIR	2	0.038876	1	0.866	0.983	0.885	1.065	1.089	1.041	1.169	0.0189023
O00541	322	K	Pescadillo homolog OS=Homo sapiens OX=9606 GN=PES1 PE=1 SV=1	PES1	1	0.00618193	65.627	ELEAQEK(1)HK	3	-0.80064	1	0.941	1.022	0.891	1.018	1.061	1.036	1.091	0.099461
O00541	121	K	Pescadillo homolog OS=Homo sapiens OX=9606 GN=PES1 PE=1 SV=1	PES1	1	0.031441	47.96	LDHIIK(1)ER	3	-0.45887	1	0.952	1.152	0.964	0.901	1.09	0.973	0.966	0.70478
O00567	87	K	Nucleolar protein 56 OS=Homo sapiens OX=9606 GN=NOP56 PE=1 SV=4	NOP56	1	8.83082e-06	79.659	LLLETHLPSK(1)K	3	0.12072	1
O00567	441	K	Nucleolar protein 56 OS=Homo sapiens OX=9606 GN=NOP56 PE=1 SV=4	NOP56	0.999707	0.0251831	62.582	KLEK(1)QEK	3	1.8576	1	0.878	0.956	0.927	1.035	1.114	1.028	1.151	0.0172425
O00571	81	K	ATP-dependent RNA helicase DDX3X OS=Homo sapiens OX=9606 GN=DDX3X PE=1 SV=3	DDX3X	1	0.037174	58.63	GK(1)SSFFSDR	2	-2.2317	1	0.999	0.959	0.935	1.039	0.998	1.056	1.069	0.058943
O00571	215	K	ATP-dependent RNA helicase DDX3X OS=Homo sapiens OX=9606 GN=DDX3X PE=1 SV=3	DDX3X	1	0.000398952	93.649	HAIPIIK(1)EK	3	0.38194	1	0.916	1.022	1.141	1.084	0.995	0.888	0.964	0.69348
O00571	64	K	ATP-dependent RNA helicase DDX3X OS=Homo sapiens OX=9606 GN=DDX3X PE=1 SV=3	DDX3X	1	0.000120299	101.53	DSSGWSSSK(1)DK	2	-0.68637	1	0.727	0.856	0.867	1.16	1.085	1.139	1.381	0.0056193
O00571	335	K	ATP-dependent RNA helicase DDX3X OS=Homo sapiens OX=9606 GN=DDX3X PE=1 SV=3	DDX3X	1	0.0400033	57.174	GK(1)IGLDFCK	2	-0.070007	1
O00584	112	K	Ribonuclease T2 OS=Homo sapiens OX=9606 GN=RNASET2 PE=1 SV=2	RNASET2	1	0.00770306	66.692	FWK(1)HEWEK	3	-0.29437	1
O00625	181	K	Pirin OS=Homo sapiens OX=9606 GN=PIR PE=1 SV=1	PIR	1	5.70318e-05	94.09	LDPGAK(1)HSQPIPK	3	-0.10092	1	0.988	1.027	0.959	0.964	1.044	1.025	1.02	0.56676
O00625	275	K	Pirin OS=Homo sapiens OX=9606 GN=PIR PE=1 SV=1	PIR	1	0.0381855	67.081	NAK(1)NGFER	2	-0.35964	1	1.016	1.081	1.059	1.02	0.966	0.93	0.924	0.070335
O00743	17	K	Serine/threonine-protein phosphatase 6 catalytic subunit OS=Homo sapiens OX=9606 GN=PPP6C PE=1 SV=1	PPP6C	1	0.0107819	52.247	LCK(1)YLPENDLK	3	-0.8501	1	0.938	1.003	1.029	0.893	0.991	1.142	1.019	0.8604
O14495	5	K	Phospholipid phosphatase 3 OS=Homo sapiens OX=9606 GN=PLPP3 PE=1 SV=1	PLPP3	1	0.0408195	42.599	MQNYK(1)YDK	3	0.17057	1
O14530	125	K	Thioredoxin domain-containing protein 9 OS=Homo sapiens OX=9606 GN=TXNDC9 PE=1 SV=2	TXNDC9	1	0.0137238	61.962	FLK(1)LNVEK	3	0.26899	1	0.938	0.903	1.004	1.138	1.019	0.971	1.099	0.17176
O14530	122	K	Thioredoxin domain-containing protein 9 OS=Homo sapiens OX=9606 GN=TXNDC9 PE=1 SV=2	TXNDC9	1	0.0399722	43.083	HLETK(1)FLK	3	-1.0981	1	1.189	0.992	1.049	0.92	0.88	1.063	0.886	0.19682
O14617	371	K	AP-3 complex subunit delta-1 OS=Homo sapiens OX=9606 GN=AP3D1 PE=1 SV=1	AP3D1	1	0.0250853	74.841	K(1)NLMEIVK	2	-0.32152	1	1.02	0.957	0.976	1.008	1.013	1.029	1.033	0.175437
O14617	820	K	AP-3 complex subunit delta-1 OS=Homo sapiens OX=9606 GN=AP3D1 PE=1 SV=1	AP3D1	1	0.0111393	74.415	LPIQK(1)HR	3	-0.19731	1	1.16	1.141	1.173	0.912	0.848	0.938	0.777	0.00123598
O14617	332	K	AP-3 complex subunit delta-1 OS=Homo sapiens OX=9606 GN=AP3D1 PE=1 SV=1	AP3D1	1	0.0415749	46.426	ILK(1)THPK	3	-0.9838	1
O14617	336	K	AP-3 complex subunit delta-1 OS=Homo sapiens OX=9606 GN=AP3D1 PE=1 SV=1	AP3D1	1	0.000831783	79.201	THPK(1)SVQSHK	4	-0.16951	1	0.828	1.088	0.905	1.062	1.027	1.046	1.111	0.3009
O14639	116	K	Actin-binding LIM protein 1 OS=Homo sapiens OX=9606 GN=ABLIM1 PE=1 SV=3	ABLIM1	1	0.00893718	55.064	VQTK(1)HFHIK	4	0.10604	1	1.177	1.229	1.028	0.959	0.978	0.796	0.796	0.053698
O14686	2096	K	Histone-lysine N-methyltransferase 2D OS=Homo sapiens OX=9606 GN=KMT2D PE=1 SV=2	KMT2D	1	0.000460695	87.184	K(1)TDRPALHLR	4	0.92121	1	1.243	1.154	0.933	0.872	0.958	0.969	0.841	0.143358
O14737	110	K	Programmed cell death protein 5 OS=Homo sapiens OX=9606 GN=PDCD5 PE=1 SV=3	PDCD5	1	0.0345853	68.456	TTTVK(1)FNR	2	-0.40466	1	0.881	0.862	0.722	1.084	1.137	1.157	1.37	0.0084615
O14737	20	K	Programmed cell death protein 5 OS=Homo sapiens OX=9606 GN=PDCD5 PE=1 SV=3	PDCD5	1	1.42542e-21	138.28	LAELQAK(1)HGDPGDAAQQEAK	4	0.11349	4	1.033	1.015	1.022	1.045	0.959	0.97	0.969	0.30168
O14744	200	K	Protein arginine N-methyltransferase 5 OS=Homo sapiens OX=9606 GN=PRMT5 PE=1 SV=4	PRMT5	1	0.00410151	103.19	TLCDYSK(1)R	2	-0.079853	1	1.202	1.066	1.196	0.926	0.895	0.887	0.782	0.0040765
O14757	53	K	Serine/threonine-protein kinase Chk1 OS=Homo sapiens OX=9606 GN=CHEK1 PE=1 SV=2	CHEK1	1	0.000367894	107.06	AVDCPENIK(1)K	2	-0.18789	1	1.351	1.44	1.483	0.713	0.7	0.742	0.504	2.4938e-05
O14818	47	K	Proteasome subunit alpha type-7 OS=Homo sapiens OX=9606 GN=PSMA7 PE=1 SV=1	PSMA7	1	0.000257056	111.63	DIVVLGVEK(1)K	2	-0.37407	1	0.982	1.057	1.121	0.987	0.949	0.972	0.92	0.110162
O14904	246	K	Protein Wnt-9a OS=Homo sapiens OX=9606 GN=WNT9A PE=1 SV=2	WNT9A	1	0.0102951	66.692	HK(1)YETALK	3	0.30052	1	1.058	1.172	1.172	0.97	1.004	0.776	0.808	0.06772
O14907	20	K	Tax1-binding protein 3 OS=Homo sapiens OX=9606 GN=TAX1BP3 PE=1 SV=2	TAX1BP3	1	0.00947618	77.058	VEIHK(1)LR	3	-0.31589	1	0.881	1.168	1.027	0.831	1.063	1.056	0.959	0.73568
O14967	507	K	Calmegin OS=Homo sapiens OX=9606 GN=CLGN PE=1 SV=1	CLGN	1	0.0109729	57.175	K(1)TDICIPQTK	3	-0.44137	1	1.31	1.282	1.31	0.809	0.781	0.821	0.618	4.0765e-06
O14979	306	K	Heterogeneous nuclear ribonucleoprotein D-like OS=Homo sapiens OX=9606 GN=HNRNPDL PE=1 SV=3	HNRNPDL	1	0.00140172	94.692	CEIK(1)VAQPK	2	-0.10858	2	1.272	1.267	1.176	0.844	0.829	0.865	0.683	0.000179049
O14979	302	K	Heterogeneous nuclear ribonucleoprotein D-like OS=Homo sapiens OX=9606 GN=HNRNPDL PE=1 SV=3	HNRNPDL	1	8.96956e-07	107.65	YHQIGSGK(1)CEIK	3	-0.88931	2	0.793	0.83	0.918	1.147	1.109	1.071	1.309	0.0046831
O14979	162	K	Heterogeneous nuclear ribonucleoprotein D-like OS=Homo sapiens OX=9606 GN=HNRNPDL PE=1 SV=3	HNRNPDL	1	0.0311903	62.338	K(1)DLTEYLSR	2	0.66093	1	1.097	0.994	1.004	0.945	0.994	1.014	0.954	0.28576
O14979	288	K	Heterogeneous nuclear ribonucleoprotein D-like OS=Homo sapiens OX=9606 GN=HNRNPDL PE=1 SV=3	HNRNPDL	1	0.000221668	84.753	GFCFITYTDEEPVK(1)K	3	-0.56063	1	1.214	1.158	1.283	0.85	0.893	0.834	0.705	0.00063509
O14980	1049	K	Exportin-1 OS=Homo sapiens OX=9606 GN=XPO1 PE=1 SV=1	XPO1	0.98328	0.00473954	71.451	QADEEK(0.983)HK(0.017)R	4	0.11188	2	1.017	1.157	1.145	0.874	0.859	1.059	0.841	0.089502
O14980	103	K	Exportin-1 OS=Homo sapiens OX=9606 GN=XPO1 PE=1 SV=1	XPO1	1	0.00322946	107.79	NQCEGIK(1)K	3	-2.6199	2	1.685	1.659	1.58	0.601	0.573	0.553	0.351	2.2658e-06
O14980	563	K	Exportin-1 OS=Homo sapiens OX=9606 GN=XPO1 PE=1 SV=1	XPO1	1	0.0151326	60.019	FLK(1)TVVNK	3	1.7528	1
O14980	560	K	Exportin-1 OS=Homo sapiens OX=9606 GN=XPO1 PE=1 SV=1	XPO1	1	0.0120055	73.039	AHWK(1)FLK	3	-0.1122	1	1.08	0.984	0.949	1.004	1.002	1.007	1	0.9726
O14980	122	K	Exportin-1 OS=Homo sapiens OX=9606 GN=XPO1 PE=1 SV=1	XPO1	1	2.0108e-07	125.53	TSSDPTCVEK(1)EK	3	-1.7379	2	1.706	1.593	1.643	0.587	0.569	0.558	0.347	8.8605e-07
O14980	531	K	Exportin-1 OS=Homo sapiens OX=9606 GN=XPO1 PE=1 SV=1	XPO1	1	0.000731941	83.869	DLLGLCEQK(1)R	3	-0.4907	2	1.135	1.129	1.11	0.891	0.94	0.933	0.819	0.00037939
O14981	1374	K	TATA-binding protein-associated factor 172 OS=Homo sapiens OX=9606 GN=BTAF1 PE=1 SV=2	BTAF1	1	0.00634333	89.369	LQHQVK(1)R	3	-0.10785	1	1.091	0.943	0.927	1.053	0.872	1.123	1.029	0.79092
O15027	1313	K	Protein transport protein Sec16A OS=Homo sapiens OX=9606 GN=SEC16A PE=1 SV=4	SEC16A	1	0.000736114	77.185	EHSAFGDRPEK(1)R	4	0.24608	1	1.001	1.054	0.84	1.025	0.949	1.115	1.067	0.46268
O15031	1429	K	Plexin-B2 OS=Homo sapiens OX=9606 GN=PLXNB2 PE=1 SV=3	PLXNB2	1	0.00235592	88.819	AIK(1)HQVEK	3	-0.82349	1	0.931	0.855	0.925	1.079	1.063	1.072	1.186	0.025296
O15143	339	K	Actin-related protein 2/3 complex subunit 1B OS=Homo sapiens OX=9606 GN=ARPC1B PE=1 SV=3	ARPC1B	1	0.00064804	58.814	NSVSQISVLSGGK(1)AK	3	-0.51814	1	1.463	1.367	1.33	0.828	0.761	0.658	0.54	0.00104414
O15143	44	K	Actin-related protein 2/3 complex subunit 1B OS=Homo sapiens OX=9606 GN=ARPC1B PE=1 SV=3	ARPC1B	1	0.00214206	90.15	WTK(1)VHELK	3	0.24911	1	0.949	0.942	0.868	1.126	0.995	1.063	1.154	0.0355
O15144	269	K	Actin-related protein 2/3 complex subunit 2 OS=Homo sapiens OX=9606 GN=ARPC2 PE=1 SV=1	ARPC2	1	0.0241005	74.841	AK(1)TSDFLK	3	0.77972	2	1.021	0.908	0.932	1.045	1.044	1.027	1.089	0.137882
O15144	77	K	Actin-related protein 2/3 complex subunit 2 OS=Homo sapiens OX=9606 GN=ARPC2 PE=1 SV=1	ARPC2	1	7.40925e-05	94.532	ELQAHGADELLK(1)R	3	0.58094	1	1.193	1.139	1.15	0.89	0.864	0.94	0.774	0.00083549
O15144	286	K	Actin-related protein 2/3 complex subunit 2 OS=Homo sapiens OX=9606 GN=ARPC2 PE=1 SV=1	ARPC2	1	0.00863406	73.233	ARPDAEK(1)K	3	-1.2655	1	1.049	0.992	0.865	1.033	1.016	1.036	1.062	0.38846
O15144	256	K	Actin-related protein 2/3 complex subunit 2 OS=Homo sapiens OX=9606 GN=ARPC2 PE=1 SV=1	ARPC2	1	0.00142729	68.536	DYLHYHIK(1)CSK	4	-0.46291	1	1.089	0.931	0.913	1.009	0.995	1.063	1.046	0.46864
O15144	117	K	Actin-related protein 2/3 complex subunit 2 OS=Homo sapiens OX=9606 GN=ARPC2 PE=1 SV=1	ARPC2	1	0.000803622	77.597	DSIVHQAGMLK(1)R	3	-0.76801	1	0.961	1.123	1.11	0.954	0.979	0.948	0.902	0.119681
O15144	65	K	Actin-related protein 2/3 complex subunit 2 OS=Homo sapiens OX=9606 GN=ARPC2 PE=1 SV=1	ARPC2	1	2.01035e-06	104.2	FYK(1)ELQAHGADELLK	3	0.24118	1	0.832	0.903	0.896	1.107	1.107	1.051	1.241	0.0023024
O15145	56	K	Actin-related protein 2/3 complex subunit 3 OS=Homo sapiens OX=9606 GN=ARPC3 PE=1 SV=3	ARPC3	1	2.41436e-08	142.83	ANVFFK(1)NYEIK	2	-0.32306	2	1.127	1.046	1.062	0.983	0.925	0.955	0.885	0.0132408
O15173	193	K	Membrane-associated progesterone receptor component 2 OS=Homo sapiens OX=9606 GN=PGRMC2 PE=1 SV=1	PGRMC2	1	0.0241005	74.841	EK(1)YDYVGR	2	-2.1603	1	0.982	0.939	0.988	1.026	1.041	1.012	1.058	0.033955
O15195	141	K	Villin-like protein OS=Homo sapiens OX=9606 GN=VILL PE=2 SV=3	VILL	1	0.0062802	83.377	LLHIK(1)GR	3	-1.476	1	1.109	1.146	1.083	0.932	0.935	0.923	0.836	0.00044171
O15235	129	K	28S ribosomal protein S12, mitochondrial OS=Homo sapiens OX=9606 GN=MRPS12 PE=1 SV=1	MRPS12	1	0.00265558	72.2	GK(1)YDCGHVQK	3	-0.33994	1	1.557	1.593	1.399	0.654	0.65	0.673	0.435	3.8165e-05
O15258	167	K	Protein RER1 OS=Homo sapiens OX=9606 GN=RER1 PE=1 SV=1	RER1	1	0.0255254	57.281	QIK(1)HMIK	3	0.027838	1	1.038	0.954	0.893	1.047	0.972	1.08	1.074	0.24768
O15260	22	K	Surfeit locus protein 4 OS=Homo sapiens OX=9606 GN=SURF4 PE=1 SV=3	SURF4	1	0.0293927	41.242	VTK(1)QYLPHVAR	3	2.4587	1	0.916	0.922	0.842	1.057	1.003	1.169	1.205	0.025957
O15269	127	K	Serine palmitoyltransferase 1 OS=Homo sapiens OX=9606 GN=SPTLC1 PE=1 SV=1	SPTLC1	1	0.000752937	91.313	K(1)YGVGTCGPR	2	0.23341	1	1.144	0.932	1.056	0.968	0.989	0.975	0.936	0.40674
O15305	149	K	Phosphomannomutase 2 OS=Homo sapiens OX=9606 GN=PMM2 PE=1 SV=1	PMM2	1	0.0430084	43.308	IEFYELDK(1)K	3	1.5308	1
O15347	112	K	High mobility group protein B3 OS=Homo sapiens OX=9606 GN=HMGB3 PE=1 SV=4	HMGB3	1	0.000696042	57.703	IK(1)STNPGISIGDVAK	3	2.0104	1	0.92	0.916	0.982	1.012	1.043	1.08	1.112	0.021924
O15347	161	K	High mobility group protein B3 OS=Homo sapiens OX=9606 GN=HMGB3 PE=1 SV=4	HMGB3	1	0.0120205	83.862	DVADYK(1)SK	2	-0.43322	1	0.626	0.65	0.676	1.259	1.256	1.209	1.908	1.7514e-05
O15355	519	K	Protein phosphatase 1G OS=Homo sapiens OX=9606 GN=PPM1G PE=1 SV=1	PPM1G	1	2.00518e-07	125.84	NTAELQPESGK(1)R	2	0.37746	1	0.679	0.73	0.666	1.227	1.241	1.175	1.756	6.2558e-05
O15355	383	K	Protein phosphatase 1G OS=Homo sapiens OX=9606 GN=PPM1G PE=1 SV=1	PPM1G	1	5.71793e-10	145.81	NAGGK(1)VTMDGR	2	0.36679	3	1.228	1.191	1.158	0.904	0.886	0.842	0.736	0.00034315
O15355	406	K	Protein phosphatase 1G OS=Homo sapiens OX=9606 GN=PPM1G PE=1 SV=1	PPM1G	1	0.0137838	57.859	AIGDHFYK(1)R	3	-1.4704	2	0.873	0.931	0.908	1.062	1.029	1.118	1.183	0.0053413
O15371	505	K	Eukaryotic translation initiation factor 3 subunit D OS=Homo sapiens OX=9606 GN=EIF3D PE=1 SV=1	EIF3D	1	0.000304788	102.4	LEEGK(1)YLILK	3	0.3426	2	0.937	1.035	1.04	1.033	0.93	1.043	0.998	0.96728
O15372	274	K	Eukaryotic translation initiation factor 3 subunit H OS=Homo sapiens OX=9606 GN=EIF3H PE=1 SV=1	EIF3H	1	4.23546e-40	198.62	QQQQK(1)HQYQQR	3	-0.3938	4	0.967	0.895	1.008	1.086	1.032	0.991	1.083	0.139705
O15372	180	K	Eukaryotic translation initiation factor 3 subunit H OS=Homo sapiens OX=9606 GN=EIF3H PE=1 SV=1	EIF3H	1	0.000139172	116.24	EK(1)DFSPEALK	3	1.7709	2	1.582	1.612	1.575	0.598	0.606	0.622	0.383	1.1966e-07
O15382	321	K	Branched-chain-amino-acid aminotransferase, mitochondrial OS=Homo sapiens OX=9606 GN=BCAT2 PE=1 SV=2	BCAT2	1	0.0102761	69.375	TITMK(1)QLLR	2	3.9197	1	1.075	1.098	1.128	0.974	0.884	0.957	0.853	0.0082795
O15417	2374	K	Trinucleotide repeat-containing gene 18 protein OS=Homo sapiens OX=9606 GN=TNRC18 PE=1 SV=3	TNRC18	1	0.0387689	58.592	K(1)SPPEPVDK	2	1.0226	1	1.256	1.284	1.275	0.83	0.843	0.796	0.647	1.93007e-05
O15511	67	K	Actin-related protein 2/3 complex subunit 5 OS=Homo sapiens OX=9606 GN=ARPC5 PE=1 SV=3	ARPC5	1	0.00325162	68.277	NPPINTK(1)SQAVK	2	-1.2855	2	1.055	1.071	0.96	0.928	1.038	0.993	0.959	0.42514
O43143	754	K	Pre-mRNA-splicing factor ATP-dependent RNA helicase DHX15 OS=Homo sapiens OX=9606 GN=DHX15 PE=1 SV=2	DHX15	1	1.67223e-05	106.32	TCTDIK(1)PEWLVK	3	0.85098	2	1.857	1.853	1.89	0.41	0.462	0.396	0.226	0.00100058
O43143	777	K	Pre-mRNA-splicing factor ATP-dependent RNA helicase DHX15 OS=Homo sapiens OX=9606 GN=DHX15 PE=1 SV=2	DHX15	1	4.52872e-05	84.94	IAPQYYDMSNFPQCEAK(1)R	3	-0.10848	1	1.249	1.222	1.24	0.674	0.844	1.008	0.681	0.076181
O43143	230	K	Pre-mRNA-splicing factor ATP-dependent RNA helicase DHX15 OS=Homo sapiens OX=9606 GN=DHX15 PE=1 SV=2	DHX15	1	4.53575e-05	104.7	FEDCSSAK(1)TILK	2	0.98953	1	1.32	1.221	1.321	0.801	0.842	0.796	0.632	0.000135101
O43143	17	K	Pre-mRNA-splicing factor ATP-dependent RNA helicase DHX15 OS=Homo sapiens OX=9606 GN=DHX15 PE=1 SV=2	DHX15	1	0.00505939	55.261	LDLGEDYPSGK(1)K	3	-0.46355	1	0.831	0.873	0.858	1.076	1.063	1.169	1.291	0.00154186
O43143	515	K	Pre-mRNA-splicing factor ATP-dependent RNA helicase DHX15 OS=Homo sapiens OX=9606 GN=DHX15 PE=1 SV=2	DHX15	1	1.19725e-06	77.185	SNLGSVVLQLK(1)K	3	-0.19599	1
O43143	143	K	Pre-mRNA-splicing factor ATP-dependent RNA helicase DHX15 OS=Homo sapiens OX=9606 GN=DHX15 PE=1 SV=2	DHX15	1	0.000137692	100.02	LQLPVWEYK(1)DR	2	-3.6621	1	0.878	0.948	0.893	1.055	0.976	1.171	1.178	0.048997
O43148	270	K	mRNA cap guanine-N7 methyltransferase OS=Homo sapiens OX=9606 GN=RNMT PE=1 SV=1	RNMT	1	0.0139677	78.556	ELLIDK(1)FR	2	-3.4601	1
O43150	555	K	Arf-GAP with SH3 domain, ANK repeat and PH domain-containing protein 2 OS=Homo sapiens OX=9606 GN=ASAP2 PE=1 SV=3	ASAP2	1	0.0158671	49.025	LHSLCEAVK(1)TR	3	-2.5375	1	0.946	0.905	1.057	0.96	1.055	1.058	1.057	0.37246
O43172	27	K	U4/U6 small nuclear ribonucleoprotein Prp4 OS=Homo sapiens OX=9606 GN=PRPF4 PE=1 SV=2	PRPF4	1	0.000351091	86.772	K(1)PHIYYGSLEEK	3	-1.8215	1	0.962	1.015	1.077	0.97	1.026	0.981	0.975	0.53826
O43175	21	K	D-3-phosphoglycerate dehydrogenase OS=Homo sapiens OX=9606 GN=PHGDH PE=1 SV=4	PHGDH	1	4.10204e-05	64.104	K(1)ILQDGGLQVVEK	3	1.087	1
O43175	351	K	D-3-phosphoglycerate dehydrogenase OS=Homo sapiens OX=9606 GN=PHGDH PE=1 SV=4	PHGDH	1	9.098e-07	75.349	AWAGSPK(1)GTIQVITQGTSLK	3	-0.40782	1	1.16	1.044	1.15	0.92	0.864	0.995	0.829	0.0236
O43181	73	K	NADH dehydrogenase [ubiquinone] iron-sulfur protein 4, mitochondrial OS=Homo sapiens OX=9606 GN=NDUFS4 PE=1 SV=1	NDUFS4	1	2.52518e-26	146.3	LDITTLTGVPEEHIK(1)TR	3	0.12683	1	0.973	0.977	0.98	0.971	1.016	1.074	1.045	0.27994
O43237	440	K	Cytoplasmic dynein 1 light intermediate chain 2 OS=Homo sapiens OX=9606 GN=DYNC1LI2 PE=1 SV=1	DYNC1LI2	1	2.86658e-06	95.414	K(1)TGSPGSPGAGGVQSTAK	3	-0.19121	1	1.015	1.23	1.078	0.962	0.859	0.975	0.841	0.069682
O43237	278	K	Cytoplasmic dynein 1 light intermediate chain 2 OS=Homo sapiens OX=9606 GN=DYNC1LI2 PE=1 SV=1	DYNC1LI2	1	0.0341427	55.261	EEK(1)NLDLLYK	2	0.88035	1	1.026	0.999	1.037	0.959	1.096	0.922	0.972	0.5955
O43242	273	K	26S proteasome non-ATPase regulatory subunit 3 OS=Homo sapiens OX=9606 GN=PSMD3 PE=1 SV=2	PSMD3	1	2.70571e-05	86.8	LVSK(1)SVFPEQANNNEWAR	3	1.4078	1	0.755	0.799	0.778	1.175	1.134	1.159	1.487	3.6682e-05
O43242	404	K	26S proteasome non-ATPase regulatory subunit 3 OS=Homo sapiens OX=9606 GN=PSMD3 PE=1 SV=2	PSMD3	1	0.0036176	72.607	HNVIK(1)TGVR	3	0.089693	1	1.004	0.928	0.948	1.028	0.966	1.104	1.076	0.18604
O43257	66	K	Zinc finger HIT domain-containing protein 1 OS=Homo sapiens OX=9606 GN=ZNHIT1 PE=1 SV=1	ZNHIT1	1	0.000415506	79.639	LPQFDDDADTGK(1)K	3	0.92723	1
O43290	175	K	U4/U6.U5 tri-snRNP-associated protein 1 OS=Homo sapiens OX=9606 GN=SART1 PE=1 SV=1	SART1	1	0.0238983	58.981	LAAAK(1)EK	3	-0.45733	1	0.94	0.943	0.896	1.048	1.117	1.004	1.14	0.020481
O43291	170	K	Kunitz-type protease inhibitor 2 OS=Homo sapiens OX=9606 GN=SPINT2 PE=1 SV=2	SPINT2	1	0.0340619	77.923	GNK(1)NSYR	2	-0.88705	1	1.798	1.763	1.715	0.471	0.578	0.439	0.282	0.000104409
O43324	21	K	Eukaryotic translation elongation factor 1 epsilon-1 OS=Homo sapiens OX=9606 GN=EEF1E1 PE=1 SV=1	EEF1E1	1	0.0110105	71.153	GNK(1)YSAQGER	2	-0.19841	1	1.004	0.927	1.008	0.997	0.987	1.074	1.04	0.35646
O43390	103	K	Heterogeneous nuclear ribonucleoprotein R OS=Homo sapiens OX=9606 GN=HNRNPR PE=1 SV=1	HNRNPR	1	6.66255e-07	118.73	SAFLCGVMK(1)TYR	2	-3.0846	2	1.432	1.392	1.443	0.732	0.709	0.725	0.508	6.1942e-07
O43390	259	K	Heterogeneous nuclear ribonucleoprotein R OS=Homo sapiens OX=9606 GN=HNRNPR PE=1 SV=1	HNRNPR	1	1.86703e-05	117.2	TK(1)ENILEEFSK	2	-1.1965	1	0.934	0.89	0.858	1.037	1.138	1.057	1.205	0.0076627
O43390	255	K	Heterogeneous nuclear ribonucleoprotein R OS=Homo sapiens OX=9606 GN=HNRNPR PE=1 SV=1	HNRNPR	1	0.000348885	106.62	LFVGSIPK(1)NK	2	-1.1293	1	0.961	1.026	0.958	1.037	1.002	1.016	1.037	0.20446
O43399	128	K	Tumor protein D54 OS=Homo sapiens OX=9606 GN=TPD52L2 PE=1 SV=2	TPD52L2	1	0.000446056	84.169	K(1)TQETLSQAGQK	3	1.0969	1	1.025	1.02	1.102	1.009	1.01	0.903	0.929	0.169722
O43399	127	K	Tumor protein D54 OS=Homo sapiens OX=9606 GN=TPD52L2 PE=1 SV=2	TPD52L2	1	0.00166184	93.345	VTQSDLYK(1)K	2	-0.92772	1	0.955	0.967	0.974	1.026	0.994	1.067	1.066	0.04066
O43399	165	K	Tumor protein D54 OS=Homo sapiens OX=9606 GN=TPD52L2 PE=1 SV=2	TPD52L2	1	7.30608e-06	121.45	NSATFK(1)SFEDR	2	-0.85623	1	0.798	0.75	0.83	1.141	1.194	1.102	1.445	0.00060139
O43399	177	K	Tumor protein D54 OS=Homo sapiens OX=9606 GN=TPD52L2 PE=1 SV=2	TPD52L2	1	0.0215481	85.716	SK(1)VVGDR	2	-1.2884	1	0.865	0.97	0.967	1.035	1.094	1.019	1.123	0.053884
O43399	78	K	Tumor protein D54 OS=Homo sapiens OX=9606 GN=TPD52L2 PE=1 SV=2	TPD52L2	1	4.08789e-14	169.37	HCGELK(1)R	3	0.063369	2	1.368	1.285	1.19	0.862	0.77	0.824	0.639	0.00100127
O43414	276	K	ERI1 exoribonuclease 3 OS=Homo sapiens OX=9606 GN=ERI3 PE=1 SV=2	ERI3	1	0.0112286	97.798	QWINLK(1)K	2	2.5371	1
O43447	137	K	Peptidyl-prolyl cis-trans isomerase H OS=Homo sapiens OX=9606 GN=PPIH PE=1 SV=1	PPIH	1	0.0192623	41.227	CDWLDGK(1)HVVFGK	3	-1.1826	1
O43447	101	K	Peptidyl-prolyl cis-trans isomerase H OS=Homo sapiens OX=9606 GN=PPIH PE=1 SV=1	PPIH	1	0.00575379	72.29	GPFADENFK(1)LR	2	0.36126	1	0.942	0.878	0.885	1.047	1.109	1.06	1.189	0.0036033
O43488	128	K	Aflatoxin B1 aldehyde reductase member 2 OS=Homo sapiens OX=9606 GN=AKR7A2 PE=1 SV=3	AKR7A2	1	0.0283511	66.486	SQLETSLK(1)R	2	0.37456	1
O43488	105	K	Aflatoxin B1 aldehyde reductase member 2 OS=Homo sapiens OX=9606 GN=AKR7A2 PE=1 SV=3	AKR7A2	1	0.0262841	42.425	IATK(1)ANPWDGK	3	-2.278	1
O43493	426	K	Trans-Golgi network integral membrane protein 2 OS=Homo sapiens OX=9606 GN=TGOLN2 PE=1 SV=4	TGOLN2	1	0.0126917	57.532	RPK(1)ASDYQR	3	0.53666	1	1.143	1.359	1.231	0.901	0.759	0.862	0.676	0.0054606
O43513	155	K	Mediator of RNA polymerase II transcription subunit 7 OS=Homo sapiens OX=9606 GN=MED7 PE=1 SV=1	MED7	1	0.0272271	55.503	FQK(1)HLER	3	-0.0082805	1	1.054	1.068	0.974	1.052	0.939	0.969	0.956	0.36608
O43592	950	K	Exportin-T OS=Homo sapiens OX=9606 GN=XPOT PE=1 SV=2	XPOT	1	0.0198985	87.323	VFK(1)NYLK	2	-0.38765	1	0.991	0.943	0.97	1.04	0.995	1.049	1.062	0.050981
O43592	627	K	Exportin-T OS=Homo sapiens OX=9606 GN=XPOT PE=1 SV=2	XPOT	1	0.00196358	70.942	NLLTPLMEK(1)FK	3	1.1354	1	0.913	0.903	1.077	1.015	1.049	1.022	1.067	0.30644
O43660	372	K	Pleiotropic regulator 1 OS=Homo sapiens OX=9606 GN=PLRG1 PE=1 SV=1	PLRG1	1	0.0124841	68.224	VTLTNHK(1)K	3	0.24655	1
O43663	268	K	Protein regulator of cytokinesis 1 OS=Homo sapiens OX=9606 GN=PRC1 PE=1 SV=2	PRC1	1	0.000111193	90.861	EAVATIMSGSK(1)AK	3	-2.4965	1
O43670	42	K	BUB3-interacting and GLEBS motif-containing protein ZNF207 OS=Homo sapiens OX=9606 GN=ZNF207 PE=1 SV=1	ZNF207	1	0.0131502	75.311	CHICHK(1)K	3	1.7225	2	1.083	0.933	0.924	1.039	0.928	1.096	1.042	0.59228
O43670	36	K	BUB3-interacting and GLEBS motif-containing protein ZNF207 OS=Homo sapiens OX=9606 GN=ZNF207 PE=1 SV=1	ZNF207	1	0.000281236	95.502	HFK(1)CHICHK	5	-0.26766	2	0.945	1.01	0.946	1.06	0.997	1.029	1.064	0.093061
O43676	34	K	NADH dehydrogenase [ubiquinone] 1 beta subcomplex subunit 3 OS=Homo sapiens OX=9606 GN=NDUFB3 PE=1 SV=3	NDUFB3	1	7.49698e-10	138.02	IEGTPLETIQK(1)K	2	-0.98804	1	1.101	0.987	1.095	0.946	0.972	0.976	0.909	0.063342
O43684	324	K	Mitotic checkpoint protein BUB3 OS=Homo sapiens OX=9606 GN=BUB3 PE=1 SV=1	BUB3	0.931888	0.00111269	60.549	QVTDAETK(0.068)PK(0.932)SPCT	3	-3.2019	1	1.201	1.28	1.279	0.808	0.919	0.778	0.666	0.00171821
O43684	179	K	Mitotic checkpoint protein BUB3 OS=Homo sapiens OX=9606 GN=BUB3 PE=1 SV=1	BUB3	1	0.0112788	74.962	ESSLK(1)YQTR	2	-0.29773	1	1.221	1.16	1.184	0.911	0.929	0.803	0.741	0.0033039
O43684	222	K	Mitotic checkpoint protein BUB3 OS=Homo sapiens OX=9606 GN=BUB3 PE=1 SV=1	BUB3	1	0.00293938	97.068	YAFK(1)CHR	3	-0.56884	1	1.047	1.031	1.117	0.961	0.999	0.927	0.904	0.036357
O43707	625	K	Alpha-actinin-4 OS=Homo sapiens OX=9606 GN=ACTN4 PE=1 SV=2	ACTN4	1	0.0136549	52.247	WEK(1)VQQLVPK	3	-0.15302	1	0.9	0.853	0.845	1.07	1.011	1.205	1.265	0.013642
O43707	50	K	Alpha-actinin-4 OS=Homo sapiens OX=9606 GN=ACTN4 PE=1 SV=2	ACTN4	1	7.92611e-17	146.96	DLLLDPAWEK(1)QQR	2	-0.41632	2	0.928	0.968	0.963	1.063	1.025	1.025	1.089	0.0090968
O43707	217	K	Alpha-actinin-4 OS=Homo sapiens OX=9606 GN=ACTN4 PE=1 SV=2	ACTN4	1	7.28143e-06	95.205	K(1)DDPVTNLNNAFEVAEK	3	-1.5686	1	0.837	0.876	0.875	1.098	1.139	1.059	1.274	0.00072333
O43707	437	K	Alpha-actinin-4 OS=Homo sapiens OX=9606 GN=ACTN4 PE=1 SV=2	ACTN4	1	0.00044812	117.93	EAMLK(1)HR	2	0.18695	3	1.063	1.081	1.032	0.973	0.93	0.997	0.913	0.020418
O43707	760	K	Alpha-actinin-4 OS=Homo sapiens OX=9606 GN=ACTN4 PE=1 SV=2	ACTN4	1	4.84124e-08	116.58	DAK(1)GISQEQMQEFR	2	-1.3263	2	1.026	1.117	1.096	0.958	0.979	0.919	0.882	0.0167559
O43707	518	K	Alpha-actinin-4 OS=Homo sapiens OX=9606 GN=ACTN4 PE=1 SV=2	ACTN4	1	0.0294753	47.894	REALEK(1)TEK	3	0.36838	1	0.995	1.001	0.991	0.977	0.933	1.111	1.011	0.88502
O43707	455	K	Alpha-actinin-4 OS=Homo sapiens OX=9606 GN=ACTN4 PE=1 SV=2	ACTN4	1	2.72216e-06	104.21	K(1)HEAFESDLAAHQDR	3	0.61653	2	0.807	1.042	0.825	1.169	0.976	1.093	1.211	0.114781
O43707	114	K	Alpha-actinin-4 OS=Homo sapiens OX=9606 GN=ACTN4 PE=1 SV=2	ACTN4	1	0.000316232	95.264	INNVNK(1)ALDFIASK	3	2.6209	2	0.89	0.925	0.991	1.056	1.013	1.076	1.121	0.033718
O43707	417	K	Alpha-actinin-4 OS=Homo sapiens OX=9606 GN=ACTN4 PE=1 SV=2	ACTN4	1	0.000163709	122.28	LDHLAEK(1)FR	2	0.98749	2	1.045	0.988	0.924	0.989	1.008	1.052	1.031	0.474
O43707	331	K	Alpha-actinin-4 OS=Homo sapiens OX=9606 GN=ACTN4 PE=1 SV=2	ACTN4	1	0.00485391	52.599	TIQEMQQK(1)LEDFR	3	-1.5523	1
O43707	363	K	Alpha-actinin-4 OS=Homo sapiens OX=9606 GN=ACTN4 PE=1 SV=2	ACTN4	1	0.000228636	75.911	CQLEINFNTLQTK(1)LR	3	-2.6269	1	0.942	1.035	0.997	0.916	1.109	1.003	1.018	0.8116
O43707	779	K	Alpha-actinin-4 OS=Homo sapiens OX=9606 GN=ACTN4 PE=1 SV=2	ACTN4	1	2.1119e-07	92.098	ASFNHFDK(1)DHGGALGPEEFK	4	-0.48137	1	0.769	0.755	0.788	1.156	1.148	1.177	1.506	4.621e-06
O43707	214	K	Alpha-actinin-4 OS=Homo sapiens OX=9606 GN=ACTN4 PE=1 SV=2	ACTN4	1	0.000180852	90.793	HRPELIEYDK(1)LR	4	-0.13638	2	0.954	0.977	0.978	1	0.987	1.088	1.057	0.158859
O43707	54	K	Alpha-actinin-4 OS=Homo sapiens OX=9606 GN=ACTN4 PE=1 SV=2	ACTN4	1	0.000300373	88.163	K(1)TFTAWCNSHLR	3	-0.14319	4	0.966	0.933	0.936	0.998	1.032	1.096	1.103	0.030383
O43719	217	K	HIV Tat-specific factor 1 OS=Homo sapiens OX=9606 GN=HTATSF1 PE=1 SV=1	HTATSF1	1	0.00151816	72.2	LHVEVAK(1)FQLK	3	0.99187	1
O43719	509	K	HIV Tat-specific factor 1 OS=Homo sapiens OX=9606 GN=HTATSF1 PE=1 SV=1	HTATSF1	1	3.552e-05	98.942	TLK(1)NDCEENGLAK	3	1.14	1	1.249	1.215	1.22	0.837	0.858	0.863	0.694	4.4046e-06
O43719	297	K	HIV Tat-specific factor 1 OS=Homo sapiens OX=9606 GN=HTATSF1 PE=1 SV=1	HTATSF1	1	0.000301098	102.05	VECSK(1)FGQIR	2	0.67424	1	1.462	1.523	1.454	0.675	0.709	0.665	0.462	2.8875e-06
O43747	78	K	AP-1 complex subunit gamma-1 OS=Homo sapiens OX=9606 GN=AP1G1 PE=1 SV=5	AP1G1	1	4.8966e-05	120.55	LIASQK(1)FTDK	2	-0.52901	1
O43765	95	K	Small glutamine-rich tetratricopeptide repeat-containing protein alpha OS=Homo sapiens OX=9606 GN=SGTA PE=1 SV=1	SGTA	1	0.0080938	74.611	LK(1)TEGNEQMK	2	-0.23816	1	1.021	1.023	1.005	0.993	0.962	1.029	0.979	0.34026
O43765	160	K	Small glutamine-rich tetratricopeptide repeat-containing protein alpha OS=Homo sapiens OX=9606 GN=SGTA PE=1 SV=1	SGTA	1	6.63113e-05	97.297	AICIDPAYSK(1)AYGR	2	-2.1466	2	1.194	1.236	1.326	0.804	0.877	0.824	0.667	0.00055514
O43776	104	K	Asparagine--tRNA ligase, cytoplasmic OS=Homo sapiens OX=9606 GN=NARS1 PE=1 SV=1	NARS1	1	0.0180433	41.621	ITIK(1)NDPSLPEPK	3	-1.2769	1	0.957	0.956	0.796	1.062	0.979	1.173	1.186	0.099676
O43776	27	K	Asparagine--tRNA ligase, cytoplasmic OS=Homo sapiens OX=9606 GN=NARS1 PE=1 SV=1	NARS1	0.999971	0.000898188	85.813	EKPFK(1)TGLK	3	-0.5259	1
O43776	60	K	Asparagine--tRNA ligase, cytoplasmic OS=Homo sapiens OX=9606 GN=NARS1 PE=1 SV=1	NARS1	1	1.04221e-05	130.44	WNVISK(1)SQLK	2	-0.79387	2	0.89	0.861	0.873	1.109	1.088	1.076	1.247	7.5548e-05
O43776	116	K	Asparagine--tRNA ligase, cytoplasmic OS=Homo sapiens OX=9606 GN=NARS1 PE=1 SV=1	NARS1	1	0.00242061	80.69	CVK(1)IGALEGYR	2	2.309	1	1.34	1.318	1.4	0.783	0.715	0.806	0.568	0.000144276
O43776	129	K	Asparagine--tRNA ligase, cytoplasmic OS=Homo sapiens OX=9606 GN=NARS1 PE=1 SV=1	NARS1	1	0.000370885	107.57	VK(1)VFGWVHR	3	0.49891	1	1.109	1.386	1.1	0.962	0.864	0.794	0.729	0.028842
O43776	507	K	Asparagine--tRNA ligase, cytoplasmic OS=Homo sapiens OX=9606 GN=NARS1 PE=1 SV=1	NARS1	1	4.18918e-05	92.439	K(1)YGTCPHGGYGLGLER	3	-2.0373	2	1.431	1.452	1.415	0.626	0.726	0.785	0.497	0.0089026
O43809	189	K	Cleavage and polyadenylation specificity factor subunit 5 OS=Homo sapiens OX=9606 GN=NUDT21 PE=1 SV=1	NUDT21	1	0.00215479	74.464	ALFAVPK(1)NYK	3	0.8736	1	0.891	0.89	0.848	1.048	1.19	1.029	1.243	0.0113433
O43809	23	K	Cleavage and polyadenylation specificity factor subunit 5 OS=Homo sapiens OX=9606 GN=NUDT21 PE=1 SV=1	NUDT21	1	5.32159e-29	174.59	GVTQFGNK(1)YIQQTK	2	1.5451	1	1.097	1.07	1.097	0.966	0.936	0.939	0.87	0.00043906
O43837	108	K	Isocitrate dehydrogenase [NAD] subunit beta, mitochondrial OS=Homo sapiens OX=9606 GN=IDH3B PE=1 SV=2	IDH3B	1	0.0297174	62.466	ENK(1)VAIIGK	2	-1.4756	1	0.975	0.988	1.015	1.097	1.016	0.926	1.02	0.7387
O43837	187	K	Isocitrate dehydrogenase [NAD] subunit beta, mitochondrial OS=Homo sapiens OX=9606 GN=IDH3B PE=1 SV=2	IDH3B	1	0.00575379	72.29	GVIECLK(1)IVTR	2	0.23636	1	1.074	0.92	1.037	0.946	1.054	0.998	0.989	0.87086
O43847	357	K	Nardilysin OS=Homo sapiens OX=9606 GN=NRDC PE=1 SV=3	NRDC	1	0.0360956	46.335	K(1)NNIDTHAR	3	1.1157	1	0.814	0.966	0.851	1.22	0.91	1.139	1.242	0.106798
O43865	286	K	S-adenosylhomocysteine hydrolase-like protein 1 OS=Homo sapiens OX=9606 GN=AHCYL1 PE=1 SV=2	AHCYL1	1	0.000233885	95.618	QK(1)FDNLYCCR	2	-2.066	1	1.227	1.089	1.163	0.962	0.919	0.821	0.777	0.0121953
O43865	108	K	S-adenosylhomocysteine hydrolase-like protein 1 OS=Homo sapiens OX=9606 GN=AHCYL1 PE=1 SV=2	AHCYL1	1	2.22772e-05	116.24	GSSNFCVK(1)NIK	2	-0.21437	2	1.681	1.607	1.609	0.598	0.531	0.613	0.356	2.2281e-05
O60271	431	K	C-Jun-amino-terminal kinase-interacting protein 4 OS=Homo sapiens OX=9606 GN=SPAG9 PE=1 SV=4	SPAG9	1	0.0133811	44.511	NALNIVK(1)NDLIAK	3	0.73523	1
O60271	1080	K	C-Jun-amino-terminal kinase-interacting protein 4 OS=Homo sapiens OX=9606 GN=SPAG9 PE=1 SV=4	SPAG9	1	0.0136549	52.247	IEK(1)SFDAHPR	3	1.1187	1	1.253	0.851	1.118	0.997	0.988	0.895	0.894	0.44864
O60281	2672	K	Zinc finger protein 292 OS=Homo sapiens OX=9606 GN=ZNF292 PE=1 SV=3	ZNF292	1	0.0187283	78.113	IVLDK(1)NLK	2	-0.44974	1	0.577	0.521	0.552	1.371	1.249	1.309	2.381	2.3313e-05
O60313	228	K	Dynamin-like 120 kDa protein, mitochondrial OS=Homo sapiens OX=9606 GN=OPA1 PE=1 SV=3	OPA1	1	1.97801e-19	134.34	IDQLQEELLHTQLK(1)YQR	3	0.16479	1	0.82	0.794	0.722	1.199	1.174	1.097	1.485	0.00105705
O60341	432	K	Lysine-specific histone demethylase 1A OS=Homo sapiens OX=9606 GN=KDM1A PE=1 SV=2	KDM1A	1	0.0394563	44.863	DEQIEHWK(1)K	3	-0.80019	1	0.982	1.033	1.105	0.979	0.996	0.96	0.941	0.168644
O60488	89	K	Long-chain-fatty-acid--CoA ligase 4 OS=Homo sapiens OX=9606 GN=ACSL4 PE=1 SV=2	ACSL4	1	0.0003684	60.255	LFDHAVSK(1)FGK	3	0.2912	1
O60493	61	K	Sorting nexin-3 OS=Homo sapiens OX=9606 GN=SNX3 PE=1 SV=3	SNX3	1	0.00531184	67.334	TNLPIFK(1)LK	3	-0.92483	1	1.05	0.955	1.077	0.946	0.964	1.049	0.96	0.45112
O60493	54	K	Sorting nexin-3 OS=Homo sapiens OX=9606 GN=SNX3 PE=1 SV=3	SNX3	1	0.0437531	55.314	VK(1)TNLPIFK	2	-1.2595	1
O60504	486	K	Vinexin OS=Homo sapiens OX=9606 GN=SORBS3 PE=1 SV=2	SORBS3	1	0.0003411	104.59	K(1)VNENWYEGR	2	-0.48362	1	1.555	1.614	1.702	0.592	0.598	0.565	0.36	2.7089e-06
O60506	252	K	Heterogeneous nuclear ribonucleoprotein Q OS=Homo sapiens OX=9606 GN=SYNCRIP PE=1 SV=2	SYNCRIP	1	0.000688907	68.657	LFVGSIPK(1)SK	3	0.2448	1
O60506	282	K	Heterogeneous nuclear ribonucleoprotein Q OS=Homo sapiens OX=9606 GN=SYNCRIP PE=1 SV=2	SYNCRIP	1	6.51012e-10	116.96	VTEGLTDVILYHQPDDK(1)K	4	1.2938	2	1.058	1.145	1.136	0.896	0.943	0.945	0.834	0.004039
O60506	91	K	Heterogeneous nuclear ribonucleoprotein Q OS=Homo sapiens OX=9606 GN=SYNCRIP PE=1 SV=2	SYNCRIP	1	1.09578e-07	98.062	DSDLSHVQNK(1)SAFLCGVMK	4	-1.2487	1	1.025	1.031	1.076	0.968	0.986	0.974	0.935	0.014423
O60506	363	K	Heterogeneous nuclear ribonucleoprotein Q OS=Homo sapiens OX=9606 GN=SYNCRIP PE=1 SV=2	SYNCRIP	1	0.000957089	90.005	AFSQFGK(1)LER	2	-0.01427	1	0.777	0.766	0.74	1.19	1.191	1.122	1.534	6.1513e-05
O60506	566	K	Heterogeneous nuclear ribonucleoprotein Q OS=Homo sapiens OX=9606 GN=SYNCRIP PE=1 SV=2	SYNCRIP	1	7.89288e-08	136.3	K(1)ADGYNQPDSK	2	1.2336	3	0.784	0.776	0.75	1.162	1.171	1.15	1.508	4.4796e-06
O60506	256	K	Heterogeneous nuclear ribonucleoprotein Q OS=Homo sapiens OX=9606 GN=SYNCRIP PE=1 SV=2	SYNCRIP	1	0.00240762	66.708	TK(1)EQILEEFSK	3	0.046134	1	0.76	0.713	0.767	1.196	1.205	1.131	1.577	0.000118126
O60506	576	K	Heterogeneous nuclear ribonucleoprotein Q OS=Homo sapiens OX=9606 GN=SYNCRIP PE=1 SV=2	SYNCRIP	1	0.000216685	94.122	ADGYNQPDSK(1)R	2	1.4494	2	0.761	0.851	0.747	1.098	1.111	1.233	1.459	0.0023354
O60506	100	K	Heterogeneous nuclear ribonucleoprotein Q OS=Homo sapiens OX=9606 GN=SYNCRIP PE=1 SV=2	SYNCRIP	1	6.66255e-07	118.73	SAFLCGVMK(1)TYR	2	-3.0846	2	1.432	1.392	1.443	0.732	0.709	0.725	0.508	6.1942e-07
O60506	297	K	Heterogeneous nuclear ribonucleoprotein Q OS=Homo sapiens OX=9606 GN=SYNCRIP PE=1 SV=2	SYNCRIP	1	0.000256937	58.246	GFCFLEYEDHK(1)TAAQAR	3	0.57553	1	0.877	0.985	1.017	1.033	1.039	1.024	1.075	0.2404
O60547	21	K	GDP-mannose 4,6 dehydratase OS=Homo sapiens OX=9606 GN=GMDS PE=1 SV=1	GMDS	1	0.00248417	76.332	GSGDGEMGK(1)PR	2	0.14873	1	1.31	1.401	1.401	0.697	0.779	0.785	0.55	0.000177801
O60547	70	K	GDP-mannose 4,6 dehydratase OS=Homo sapiens OX=9606 GN=GMDS PE=1 SV=1	GMDS	1	3.62587e-14	127.83	IEHLYK(1)NPQAHIEGNMK	4	-0.56566	1	1.013	1.016	0.992	1.01	1.004	0.991	0.995	0.60336
O60547	338	K	GDP-mannose 4,6 dehydratase OS=Homo sapiens OX=9606 GN=GMDS PE=1 SV=1	GMDS	1	8.18842e-10	116.13	YYRPTEVDFLQGDCTK(1)AK	3	-1.1008	1	1.629	1.579	1.575	0.613	0.602	0.605	0.381	7.3982e-08
O60547	301	K	GDP-mannose 4,6 dehydratase OS=Homo sapiens OX=9606 GN=GMDS PE=1 SV=1	GMDS	1	6.53413e-14	142.91	TIVWEGK(1)NENEVGR	2	-0.1031	2	1.047	1.051	1.11	0.919	0.954	0.999	0.895	0.022398
O60563	638	K	Cyclin-T1 OS=Homo sapiens OX=9606 GN=CCNT1 PE=1 SV=1	CCNT1	1	0.00552841	76.679	VPHSK(1)LDK	3	1.682	1	0.865	0.856	0.833	1.142	1.07	1.108	1.3	0.00028008
O60563	404	K	Cyclin-T1 OS=Homo sapiens OX=9606 GN=CCNT1 PE=1 SV=1	CCNT1	1	0.00713532	64.064	HAEELAAQK(1)R	3	0.3828	1	0.958	1.094	1.023	0.996	1.003	0.966	0.964	0.43008
O60610	1252	K	Protein diaphanous homolog 1 OS=Homo sapiens OX=9606 GN=DIAPH1 PE=1 SV=2	DIAPH1	1	4.73417e-07	106.35	VSK(1)NSETFPTILEEAK	3	0.41614	1	0.815	0.815	0.877	1.193	1.059	1.101	1.337	0.0024608
O60610	774	K	Protein diaphanous homolog 1 OS=Homo sapiens OX=9606 GN=DIAPH1 PE=1 SV=2	DIAPH1	1	0.0295822	62.536	LYK(1)PEVQLR	2	-2.66	1	0.878	0.933	1.003	1.065	1.038	1.037	1.116	0.048103
O60610	214	K	Protein diaphanous homolog 1 OS=Homo sapiens OX=9606 GN=DIAPH1 PE=1 SV=2	DIAPH1	1	0.00230122	101.28	NK(1)HEIIR	3	2.5157	3	1.042	1.04	0.956	1.048	0.993	0.957	0.987	0.7514
O60610	202	K	Protein diaphanous homolog 1 OS=Homo sapiens OX=9606 GN=DIAPH1 PE=1 SV=2	DIAPH1	1	3.55825e-07	106.6	LHDEK(1)EETAGSYDSR	3	0.56169	1	0.858	0.95	0.91	0.973	1.089	1.137	1.177	0.042459
O60613	83	K	Selenoprotein F OS=Homo sapiens OX=9606 GN=SELENOF PE=1 SV=4	SELENOF	1	0.00121819	65.043	GCCQEEAQFETK(1)K	3	-0.64264	1	1.152	1.109	1.001	0.946	0.914	0.983	0.872	0.044035
O60664	164	K	Perilipin-3 OS=Homo sapiens OX=9606 GN=PLIN3 PE=1 SV=3	PLIN3	1	0.00150363	72.34	GAVQSGVDK(1)TK	3	-0.64356	1
O60664	257	K	Perilipin-3 OS=Homo sapiens OX=9606 GN=PLIN3 PE=1 SV=3	PLIN3	1	0.000128202	91.62	QHAYEHSLGK(1)LR	3	0.1434	3	0.946	0.976	0.922	0.968	1.062	1.087	1.096	0.080922
O60701	124	K	UDP-glucose 6-dehydrogenase OS=Homo sapiens OX=9606 GN=UGDH PE=1 SV=1	UGDH	1	0.0167784	90.707	IVQNSNGYK(1)IVTEK	3	-0.21412	1	1.005	0.978	0.964	1.038	0.984	1.033	1.037	0.162676
O60701	434	K	UDP-glucose 6-dehydrogenase OS=Homo sapiens OX=9606 GN=UGDH PE=1 SV=1	UGDH	1	4.17392e-05	98.156	MLK(1)PAFIFDGR	3	0.094506	2	1.005	0.92	0.956	1.129	1.022	0.955	1.078	0.25196
O60701	67	K	UDP-glucose 6-dehydrogenase OS=Homo sapiens OX=9606 GN=UGDH PE=1 SV=1	UGDH	1	0.000222114	80.632	GK(1)NLFFSTNIDDAIK	3	0.30883	1
O60701	329	K	UDP-glucose 6-dehydrogenase OS=Homo sapiens OX=9606 GN=UGDH PE=1 SV=1	UGDH	1	6.48521e-07	115.91	IIDSLFNTVTDK(1)K	2	0.21596	2	0.944	0.855	0.828	1.157	1.085	1.035	1.247	0.0121961
O60701	107	K	UDP-glucose 6-dehydrogenase OS=Homo sapiens OX=9606 GN=UGDH PE=1 SV=1	UGDH	1	0.00098446	84.753	AADLK(1)YIEACAR	2	-0.19357	2	1.041	1.104	1.135	0.938	1.043	0.85	0.863	0.080064
O60716	448	K	Catenin delta-1 OS=Homo sapiens OX=9606 GN=CTNND1 PE=1 SV=1	CTNND1	1	1.1653e-10	125.47	IAIK(1)NCDGVPALVR	3	1.9491	2	1.454	1.467	1.396	0.71	0.723	0.699	0.494	1.3007e-06
O60716	846	K	Catenin delta-1 OS=Homo sapiens OX=9606 GN=CTNND1 PE=1 SV=1	CTNND1	1	0.000757674	89.507	K(1)SDFQVNLNNASR	2	4.4664	1	1.431	1.414	1.468	0.7	0.699	0.732	0.494	1.4922e-06
O60716	433	K	Catenin delta-1 OS=Homo sapiens OX=9606 GN=CTNND1 PE=1 SV=1	CTNND1	1	1.11486e-07	106.57	KEVHLGACGALK(1)NISFGR	4	1.4455	1	1.243	1.233	1.245	0.809	0.888	0.834	0.68	0.005064
O60716	444	K	Catenin delta-1 OS=Homo sapiens OX=9606 GN=CTNND1 PE=1 SV=1	CTNND1	1	0.00414701	83.045	DQDNK(1)IAIK	2	1.2653	1	1.19	1.225	1.219	0.847	0.898	0.844	0.712	0.000101629
O60716	749	K	Catenin delta-1 OS=Homo sapiens OX=9606 GN=CTNND1 PE=1 SV=1	CTNND1	1	0.00352059	50.088	ELIGK(1)HAIPNLVK	3	-0.67948	1
O60749	487	K	Sorting nexin-2 OS=Homo sapiens OX=9606 GN=SNX2 PE=1 SV=2	SNX2	1	0.00209217	117.7	DFK(1)TVIIK	2	0.33043	1	0.907	0.979	0.952	1.051	1.029	1.045	1.101	0.0139846
O60828	189	K	Polyglutamine-binding protein 1 OS=Homo sapiens OX=9606 GN=PQBP1 PE=1 SV=1	PQBP1	1	0.00581681	59.155	REELAPYPK(1)SK	3	0.33605	1	0.898	0.789	0.937	1.085	1.058	1.127	1.246	0.0154249
O60841	1160	K	Eukaryotic translation initiation factor 5B OS=Homo sapiens OX=9606 GN=EIF5B PE=1 SV=4	EIF5B	1	0.00524866	44.788	GQEVCVK(1)IEPIPGESPK	3	3.2257	1	1.005	1.037	1.203	0.891	1.047	0.91	0.878	0.158539
O60841	1085	K	Eukaryotic translation initiation factor 5B OS=Homo sapiens OX=9606 GN=EIF5B PE=1 SV=4	EIF5B	1	0.000176877	86.944	QEEFK(1)HIAVFPCK	3	-0.89637	1	0.906	0.988	0.992	1.008	0.968	1.113	1.07	0.25802
O60841	916	K	Eukaryotic translation initiation factor 5B OS=Homo sapiens OX=9606 GN=EIF5B PE=1 SV=4	EIF5B	1	0.0108819	97.635	VK(1)NQYEK	2	-0.81367	1	0.966	0.908	0.941	1.079	1.059	1.008	1.118	0.0148591
O60841	1015	K	Eukaryotic translation initiation factor 5B OS=Homo sapiens OX=9606 GN=EIF5B PE=1 SV=4	EIF5B	1	9.20597e-05	71.601	TSEVPYAGINIGPVHK(1)K	3	-0.11615	1	1.011	0.94	0.942	1.016	1.037	1.038	1.068	0.055383
O60841	921	K	Eukaryotic translation initiation factor 5B OS=Homo sapiens OX=9606 GN=EIF5B PE=1 SV=4	EIF5B	1	0.0118663	73.26	NQYEK(1)HK	3	1.6501	2	1.004	0.965	1.043	1.048	0.992	0.973	1	0.99198
O60841	1185	K	Eukaryotic translation initiation factor 5B OS=Homo sapiens OX=9606 GN=EIF5B PE=1 SV=4	EIF5B	1	0.0106581	44.691	HFEATDILVSK(1)ISR	3	-1.1322	1	1.028	1.003	1.035	0.987	0.979	1.008	0.97	0.077778
O60869	56	K	Endothelial differentiation-related factor 1 OS=Homo sapiens OX=9606 GN=EDF1 PE=1 SV=1	EDF1	1	8.9958e-05	93.442	QHSITK(1)NTAK	3	-1.7892	1	0.849	0.809	0.693	1.221	1.051	1.19	1.473	0.0071753
O60869	43	K	Endothelial differentiation-related factor 1 OS=Homo sapiens OX=9606 GN=EDF1 PE=1 SV=1	EDF1	1	0.0158941	80.219	K(1)WAAGQNK	2	-2.0176	1	0.763	0.767	0.761	1.153	1.109	1.231	1.525	0.0052223
O60884	152	K	DnaJ homolog subfamily A member 2 OS=Homo sapiens OX=9606 GN=DNAJA2 PE=1 SV=1	DNAJA2	1	9.51294e-11	115.63	NVLCSACSGQGGK(1)SGAVQK	3	-1.3781	1	0.801	0.901	0.869	1.159	1.098	1.052	1.287	0.0048047
O60884	25	K	DnaJ homolog subfamily A member 2 OS=Homo sapiens OX=9606 GN=DNAJA2 PE=1 SV=1	DNAJA2	1	0.000174394	59.372	LYDILGVPPGASENELK(1)K	3	-2.6396	1
O60884	134	K	DnaJ homolog subfamily A member 2 OS=Homo sapiens OX=9606 GN=DNAJA2 PE=1 SV=1	DNAJA2	1	0.0325086	69.721	TTK(1)LQLSK	2	-0.13961	1	0.955	0.94	1.073	1.055	1.001	0.983	1.024	0.62216
O60884	226	K	DnaJ homolog subfamily A member 2 OS=Homo sapiens OX=9606 GN=DNAJA2 PE=1 SV=1	DNAJA2	1	0.00621627	83.614	GMK(1)HGQR	3	0.21838	2	0.957	1.144	1.026	0.967	0.904	1.055	0.936	0.39182
O60884	297	K	DnaJ homolog subfamily A member 2 OS=Homo sapiens OX=9606 GN=DNAJA2 PE=1 SV=1	DNAJA2	1	0.00277092	50.353	QIVVK(1)YPPGK	3	-0.26182	1
O60925	90	K	Prefoldin subunit 1 OS=Homo sapiens OX=9606 GN=PFDN1 PE=1 SV=2	PFDN1	1	0.0178121	89.355	IAEEK(1)IK	2	0.18798	1
O60925	83	K	Prefoldin subunit 1 OS=Homo sapiens OX=9606 GN=PFDN1 PE=1 SV=2	PFDN1	1	0.00043395	80.69	EAIHSQLLEK(1)QK	3	-0.066086	1
O60927	66	K	E3 ubiquitin-protein ligase PPP1R11 OS=Homo sapiens OX=9606 GN=PPP1R11 PE=1 SV=1	PPP1R11	1	0.0135048	72.879	CCCIYEK(1)PR	2	0.23644	1	1.137	1.165	1.14	0.903	0.951	0.866	0.79	0.00110321
O60934	544	K	Nibrin OS=Homo sapiens OX=9606 GN=NBN PE=1 SV=1	NBN	1	0.00552841	76.679	SHAAEK(1)LR	2	-0.98909	2	0.928	0.957	0.953	1.1	1.007	1.022	1.103	0.028641
O75083	321	K	WD repeat-containing protein 1 OS=Homo sapiens OX=9606 GN=WDR1 PE=1 SV=4	WDR1	1	0.000302318	74.987	GHSK(1)SIQCLTVHK	4	-0.04156	1	1.041	1.234	1.181	0.976	0.956	0.78	0.785	0.049421
O75083	115	K	WD repeat-containing protein 1 OS=Homo sapiens OX=9606 GN=WDR1 PE=1 SV=4	WDR1	1	0.00202391	84.479	DIAWTEDSK(1)R	2	-0.21163	1	0.91	0.866	0.956	1.071	1.043	1.083	1.17	0.0067393
O75131	52	K	Copine-3 OS=Homo sapiens OX=9606 GN=CPNE3 PE=1 SV=1	CPNE3	1	0.000935729	89.44	IK(1)NCLNPQFSK	2	-0.99848	1	1.29	1.403	1.219	0.794	0.78	0.826	0.613	0.00038271
O75150	250	K	E3 ubiquitin-protein ligase BRE1B OS=Homo sapiens OX=9606 GN=RNF40 PE=1 SV=5	RNF40	1	0.000804966	58.079	LQDLATQLQEK(1)HHR	4	0.31758	1	0.82	0.964	0.995	0.993	1.019	1.143	1.135	0.156883
O75150	20	K	E3 ubiquitin-protein ligase BRE1B OS=Homo sapiens OX=9606 GN=RNF40 PE=1 SV=5	RNF40	1	0.000452636	78.324	AAGDGGSGPPEK(1)K	3	2.5976	2	1.33	1.292	1.211	0.861	0.828	0.775	0.643	0.00043715
O75151	720	K	Lysine-specific demethylase PHF2 OS=Homo sapiens OX=9606 GN=PHF2 PE=1 SV=4	PHF2	1	0.0142921	62.338	AVLPTPVTK(1)PK	2	-0.29159	1
O75153	1186	K	Clustered mitochondria protein homolog OS=Homo sapiens OX=9606 GN=CLUH PE=1 SV=2	CLUH	1	0.00147048	50.088	TQLGEDHEK(1)TK	3	-0.76432	1
O75175	41	K	CCR4-NOT transcription complex subunit 3 OS=Homo sapiens OX=9606 GN=CNOT3 PE=1 SV=1	CNOT3	1	0.00188352	64.121	LHNAANANQK(1)EK	3	3.4187	1	0.941	0.972	1.149	0.962	0.969	1.039	0.97	0.70358
O75197	526	K	Low-density lipoprotein receptor-related protein 5 OS=Homo sapiens OX=9606 GN=LRP5 PE=1 SV=2	LRP5	1	0.0142367	76.073	TDK(1)IEVINVDGTK	2	2.3659	1	0.196	0.27	0.207	1.517	0.67	2.37	6.771	0.0093419
O75223	50	K	Gamma-glutamylcyclotransferase OS=Homo sapiens OX=9606 GN=GGCT PE=1 SV=1	GGCT	1	0.000138965	87.647	LQDFK(1)LDFGNSQGK	3	-0.9069	1	0.902	0.983	1.012	1.022	1.034	1.027	1.064	0.20932
O75223	88	K	Gamma-glutamylcyclotransferase OS=Homo sapiens OX=9606 GN=GGCT PE=1 SV=1	GGCT	1	0.0270678	43.794	MNK(1)SNLNSLDEQEGVK	2	0.085451	1	1.004	0.959	0.913	1.086	0.944	1.075	1.08	0.22664
O75223	118	K	Gamma-glutamylcyclotransferase OS=Homo sapiens OX=9606 GN=GGCT PE=1 SV=1	GGCT	1	6.66255e-07	118.73	VATQEGK(1)EITCR	2	0.66571	2	1.398	1.342	1.479	0.758	0.777	0.665	0.521	0.00030397
O75223	141	K	Gamma-glutamylcyclotransferase OS=Homo sapiens OX=9606 GN=GGCT PE=1 SV=1	GGCT	1	0.0134271	82.426	K(1)IICMGAK	2	0.088083	1
O75223	148	K	Gamma-glutamylcyclotransferase OS=Homo sapiens OX=9606 GN=GGCT PE=1 SV=1	GGCT	1	0.00459082	69.979	IICMGAK(1)ENGLPLEYQEK	3	-1.6952	1	1.236	1.374	1.275	0.814	0.832	0.775	0.623	0.00023762
O75223	140	K	Gamma-glutamylcyclotransferase OS=Homo sapiens OX=9606 GN=GGCT PE=1 SV=1	GGCT	1	8.28387e-05	64.89	SYLMTNYESAPPSPQYK(1)K	3	-0.18408	1	1.054	1.054	1.162	0.937	0.972	0.926	0.867	0.0163836
O75312	119	K	Zinc finger protein ZPR1 OS=Homo sapiens OX=9606 GN=ZPR1 PE=1 SV=1	ZPR1	1	0.0189713	58.338	EVVK(1)TDSAATR	2	-1.5498	1	0.835	1.085	1.249	0.983	1.016	0.896	0.914	0.56186
O75323	75	K	Protein NipSnap homolog 2 OS=Homo sapiens OX=9606 GN=NIPSNAP2 PE=1 SV=1	NIPSNAP2	1	7.14122e-32	147.11	ETSNLYK(1)LQFHNVKPECLEAYNK	4	-0.2199	7	0.215	0.206	0.225	1.621	1.5	1.487	7.133	3.9428e-07
O75323	82	K	Protein NipSnap homolog 2 OS=Homo sapiens OX=9606 GN=NIPSNAP2 PE=1 SV=1	NIPSNAP2	1	0.000148743	83.54	LQFHNVK(1)PECLEAYNK	3	-0.63134	2	1.546	1.481	1.482	0.69	0.659	0.656	0.445	1.4785e-06
O75356	140	K	Ectonucleoside triphosphate diphosphohydrolase 5 OS=Homo sapiens OX=9606 GN=ENTPD5 PE=1 SV=1	ENTPD5	1	0.0231198	52.716	LLPEHK(1)AK	3	0.64469	1	1.005	0.982	0.865	1.029	1.019	1.071	1.094	0.135861
O75366	140	K	Advillin OS=Homo sapiens OX=9606 GN=AVIL PE=1 SV=3	AVIL	1	0.0055507	86.086	LLHVK(1)GK	3	0.725	1	1.003	0.932	1.101	0.984	1.043	0.965	0.986	0.8227
O75367	304	K	Core histone macro-H2A.1 OS=Homo sapiens OX=9606 GN=H2AFY PE=1 SV=4	H2AFY	1	0.000144859	116.24	NCLALADDK(1)K	2	0.39339	2	1.634	1.692	1.494	0.556	0.613	0.622	0.372	4.0974e-05
O75367	295	K	Core histone macro-H2A.1 OS=Homo sapiens OX=9606 GN=H2AFY PE=1 SV=4	H2AFY	1	5.52362e-05	96.773	TVK(1)NCLALADDKK	3	-0.98776	1	1.421	1.369	1.343	0.754	0.74	0.762	0.546	2.6924e-06
O75367	307	K	Core histone macro-H2A.1 OS=Homo sapiens OX=9606 GN=H2AFY PE=1 SV=4	H2AFY	1	0.0185105	52.599	LK(1)SIAFPSIGSGR	2	1.608	1
O75369	1897	K	Filamin-B OS=Homo sapiens OX=9606 GN=FLNB PE=1 SV=2	FLNB	1	0.000717647	63.29	YNDK(1)HIPGSPFTAK	3	0.02141	1	0.957	0.87	0.932	1.097	1.078	1.01	1.154	0.0192771
O75369	2170	K	Filamin-B OS=Homo sapiens OX=9606 GN=FLNB PE=1 SV=2	FLNB	1	7.13636e-23	149.6	FVPQEMGVHTVSVK(1)YR	3	0.4389	1	0.857	0.828	1.045	1.047	1.106	1.043	1.171	0.095904
O75369	502	K	Filamin-B OS=Homo sapiens OX=9606 GN=FLNB PE=1 SV=2	FLNB	1	0.0050247	67.897	GLEELVK(1)QK	3	1.3459	1
O75369	607	K	Filamin-B OS=Homo sapiens OX=9606 GN=FLNB PE=1 SV=2	FLNB	1	0.000924829	53.453	IEYNDQNDGSCDVK(1)YWPK	3	-0.21881	1
O75369	495	K	Filamin-B OS=Homo sapiens OX=9606 GN=FLNB PE=1 SV=2	FLNB	1	0.00108301	89.301	GPK(1)GLEELVK	2	-0.26285	1	1	0.981	0.903	1.071	0.984	1.044	1.075	0.146123
O75369	419	K	Filamin-B OS=Homo sapiens OX=9606 GN=FLNB PE=1 SV=2	FLNB	1	0.000533492	66.004	CVYK(1)PMQPGPHVVK	3	-1.4172	1	1.234	1.149	1.207	0.874	0.878	0.872	0.731	0.0045555
O75369	1423	K	Filamin-B OS=Homo sapiens OX=9606 GN=FLNB PE=1 SV=2	FLNB	1	0.0293936	62.633	DVVDPSK(1)VK	2	0.11041	1	0.992	0.961	0.983	1.089	0.899	1.076	1.044	0.59752
O75369	847	K	Filamin-B OS=Homo sapiens OX=9606 GN=FLNB PE=1 SV=2	FLNB	1	1.35702e-05	108.35	VDPSHDASK(1)VK	2	0.54563	2	1.067	1.06	1.059	0.948	1.054	0.893	0.909	0.18048
O75369	1005	K	Filamin-B OS=Homo sapiens OX=9606 GN=FLNB PE=1 SV=2	FLNB	1	0.00117196	88.803	ENSTAK(1)FIPR	2	-1.1343	1	1.078	1.081	1.083	0.976	0.929	0.951	0.881	0.0124784
O75369	476	K	Filamin-B OS=Homo sapiens OX=9606 GN=FLNB PE=1 SV=2	FLNB	1	0.000139172	116.24	ETTDFK(1)VDTK	2	0.47241	1	1.201	1.184	1.074	0.957	0.908	0.851	0.785	0.0077631
O75369	2530	K	Filamin-B OS=Homo sapiens OX=9606 GN=FLNB PE=1 SV=2	FLNB	1	3.33764e-08	107.35	AFVGQK(1)SSFLVDCSK	3	-1.854	1	1.148	1.351	1.348	0.758	0.791	0.886	0.633	0.0030407
O75369	744	K	Filamin-B OS=Homo sapiens OX=9606 GN=FLNB PE=1 SV=2	FLNB	1	0.000572398	67.997	VNIGQGSHPQK(1)VK	3	-0.18369	1	1.013	0.981	1.062	0.941	1.014	1.023	0.974	0.49988
O75369	681	K	Filamin-B OS=Homo sapiens OX=9606 GN=FLNB PE=1 SV=2	FLNB	1	1.50424e-10	123.29	APLK(1)IFAQDGEGQR	2	0.80087	2	0.915	0.843	0.964	1.069	1.051	1.086	1.178	0.0147353
O75369	15	K	Filamin-B OS=Homo sapiens OX=9606 GN=FLNB PE=1 SV=2	FLNB	1	0.000367894	107.06	DLAEDAPWK(1)K	2	1.0741	2	1.034	1.054	1.04	0.954	1.005	0.97	0.936	0.0157632
O75369	313	K	Filamin-B OS=Homo sapiens OX=9606 GN=FLNB PE=1 SV=2	FLNB	1	4.87732e-05	109.15	NK(1)TYSVEYLPK	2	0.051164	1	0.805	0.92	0.955	1.042	1.135	1.05	1.204	0.032865
O75369	1955	K	Filamin-B OS=Homo sapiens OX=9606 GN=FLNB PE=1 SV=2	FLNB	1	0.00355975	87.181	DEPCLLK(1)R	3	-0.3325	2	1.134	1.11	1.179	0.897	0.917	0.919	0.798	0.0003043
O75369	1979	K	Filamin-B OS=Homo sapiens OX=9606 GN=FLNB PE=1 SV=2	FLNB	1	4.34476e-05	101.39	EVGEHLVSIK(1)K	3	0.10059	1	0.995	0.945	0.931	1.072	0.989	1.047	1.083	0.064562
O75369	551	K	Filamin-B OS=Homo sapiens OX=9606 GN=FLNB PE=1 SV=2	FLNB	1	0.00534704	44.577	SPFEVQVGPEAGMQK(1)VR	3	-0.58665	1
O75369	2150	K	Filamin-B OS=Homo sapiens OX=9606 GN=FLNB PE=1 SV=2	FLNB	1	0.000247341	58.712	VTEAEIVPMGK(1)NSHCVR	3	-1.7424	1	0.835	0.809	0.854	1.106	1.183	1.068	1.344	0.00095904
O75376	1336	K	Nuclear receptor corepressor 1 OS=Homo sapiens OX=9606 GN=NCOR1 PE=1 SV=2	NCOR1	1	0.000596927	91.62	GK(1)PYDGITTIK	2	-0.53453	1
O75380	108	K	NADH dehydrogenase [ubiquinone] iron-sulfur protein 6, mitochondrial OS=Homo sapiens OX=9606 GN=NDUFS6 PE=1 SV=1	NDUFS6	1	7.83742e-05	89.911	ETK(1)TGTCGYCGLQFR	3	0.21716	1	1.176	1.135	1.076	0.936	0.902	0.923	0.815	0.00189515
O75390	215	K	Citrate synthase, mitochondrial OS=Homo sapiens OX=9606 GN=CS PE=1 SV=2	CS	1	0.00172049	85.733	LPCVAAK(1)IYR	2	1.0173	1	1.215	1.11	1.225	0.886	0.903	0.862	0.747	0.00106017
O75390	450	K	Citrate synthase, mitochondrial OS=Homo sapiens OX=9606 GN=CS PE=1 SV=2	CS	1	0.00132365	86.944	PK(1)SMSTEGLMK	2	-1.0004	1	1.067	1.122	0.956	0.975	0.869	1.074	0.928	0.379
O75390	366	K	Citrate synthase, mitochondrial OS=Homo sapiens OX=9606 GN=CS PE=1 SV=2	CS	1	0.000652943	64.244	EFALK(1)HLPNDPMFK	3	-0.27423	3	1.026	1.09	1.1	0.965	0.932	0.974	0.893	0.011562
O75390	76	K	Citrate synthase, mitochondrial OS=Homo sapiens OX=9606 GN=CS PE=1 SV=2	CS	1	1.26551e-28	148.85	GMK(1)GLVYETSVLDPDEGIR	2	-0.51816	3	1.16	1.196	1.193	0.863	0.871	0.91	0.745	0.000101229
O75419	309	K	Cell division control protein 45 homolog OS=Homo sapiens OX=9606 GN=CDC45 PE=1 SV=1	CDC45	1	0.0174553	69.825	LWSVHGQK(1)R	2	0.99362	1	3.15	1.418	0.535	0.602	0.473	0.602	0.329	0.23262
O75436	188	K	Vacuolar protein sorting-associated protein 26A OS=Homo sapiens OX=9606 GN=VPS26A PE=1 SV=2	VPS26A	1	0.000468872	85.355	YHLK(1)DVIVGK	3	-0.79151	1	0.984	0.965	0.92	1.065	1.073	0.973	1.084	0.097044
O75475	360	K	PC4 and SFRS1-interacting protein OS=Homo sapiens OX=9606 GN=PSIP1 PE=1 SV=1	PSIP1	1	0.00189204	75.652	IHAEIK(1)NSLK	3	-0.029006	1	0.843	0.86	0.839	1.116	1.069	1.14	1.308	0.000196142
O75477	286	K	Erlin-1 OS=Homo sapiens OX=9606 GN=ERLIN1 PE=1 SV=2	ERLIN1	1	0.010633	57.785	LTPEYLELK(1)K	3	0.42591	1	0.709	0.71	0.764	1.106	1.233	1.221	1.631	0.00032495
O75487	44	K	Glypican-4 OS=Homo sapiens OX=9606 GN=GPC4 PE=1 SV=4	GPC4	1	1.65724e-10	118.72	GFNK(1)NDAPLHEINGDHLK	4	0.22408	2	0.727	0.708	0.733	1.228	1.179	1.174	1.652	4.6607e-06
O75494	218	K	Serine/arginine-rich splicing factor 10 OS=Homo sapiens OX=9606 GN=SRSF10 PE=1 SV=1	SRSF10	1	0.0366527	44.98	THYK(1)SGSR	3	-0.5685	1	0.921	1.056	0.915	1.259	1.063	0.784	1.074	0.72642
O75521	161	K	Enoyl-CoA delta isomerase 2, mitochondrial OS=Homo sapiens OX=9606 GN=ECI2 PE=1 SV=4	ECI2	1	8.39154e-05	91.969	K(1)NAINTEMYHEIMR	3	-0.53965	2	1.043	1.003	1.082	0.964	0.994	0.974	0.937	0.053142
O75521	62	K	Enoyl-CoA delta isomerase 2, mitochondrial OS=Homo sapiens OX=9606 GN=ECI2 PE=1 SV=4	ECI2	1	0.0255233	61.344	DPGNEVK(1)LK	2	-3.3159	2	1.057	1.088	1.102	0.922	0.955	0.972	0.877	0.0027249
O75531	6	K	Barrier-to-autointegration factor OS=Homo sapiens OX=9606 GN=BANF1 PE=1 SV=1	BANF1	1	0.0231461	58.119	TTSQK(1)HR	2	-0.95945	1	0.693	0.598	0.613	1.202	1.173	1.377	1.971	0.00055745
O75531	64	K	Barrier-to-autointegration factor OS=Homo sapiens OX=9606 GN=BANF1 PE=1 SV=1	BANF1	1	0.000316458	84.605	EWLK(1)DTCGANAK	3	0.35983	1	1.146	1.071	0.986	0.998	0.894	0.995	0.901	0.141957
O75533	6	K	Splicing factor 3B subunit 1 OS=Homo sapiens OX=9606 GN=SF3B1 PE=1 SV=3	SF3B1	1	1.23451e-13	139.66	IAK(1)THEDIEAQIR	3	-0.12268	1	0.871	0.834	0.948	1.082	1.044	1.122	1.224	0.0091015
O75533	562	K	Splicing factor 3B subunit 1 OS=Homo sapiens OX=9606 GN=SF3B1 PE=1 SV=3	SF3B1	1	1.48592e-05	93.623	ILYK(1)LDDLVR	2	0.11838	1
O75533	741	K	Splicing factor 3B subunit 1 OS=Homo sapiens OX=9606 GN=SF3B1 PE=1 SV=3	SF3B1	1	0.00266079	89.047	GK(1)GLAAFLK	2	-1.0948	1	0.924	0.928	0.919	1.07	1.052	1.051	1.145	3.5359e-05
O75533	120	K	Splicing factor 3B subunit 1 OS=Homo sapiens OX=9606 GN=SF3B1 PE=1 SV=3	SF3B1	1	9.97226e-05	108.98	IADREDEYK(1)K	3	-1.6412	1	0.865	0.806	0.863	1.076	1.15	1.105	1.315	0.00081986
O75533	175	K	Splicing factor 3B subunit 1 OS=Homo sapiens OX=9606 GN=SF3B1 PE=1 SV=3	SF3B1	1	0.0111062	85.355	QQLAEK(1)AK	2	1.3483	1	0.988	0.972	1.04	0.982	1.077	0.958	1.006	0.91278
O75534	758	K	Cold shock domain-containing protein E1 OS=Homo sapiens OX=9606 GN=CSDE1 PE=1 SV=2	CSDE1	1	6.32805e-17	149.35	LK(1)NITLDDASAPR	2	0.12559	1	0.987	1.034	0.999	0.961	1.059	0.982	0.994	0.84804
O75643	733	K	U5 small nuclear ribonucleoprotein 200 kDa helicase OS=Homo sapiens OX=9606 GN=SNRNP200 PE=1 SV=2	SNRNP200	1	0.0249262	82.426	ETGK(1)TAR	2	0.83845	1	1.064	1.182	0.98	0.966	1.014	0.889	0.889	0.156418
O75643	60	K	U5 small nuclear ribonucleoprotein 200 kDa helicase OS=Homo sapiens OX=9606 GN=SNRNP200 PE=1 SV=2	SNRNP200	1	0.00369213	84.882	TK(1)PQMQEER	2	0.91845	1	1.083	1.2	1.094	0.903	0.947	0.91	0.817	0.0049613
O75643	1552	K	U5 small nuclear ribonucleoprotein 200 kDa helicase OS=Homo sapiens OX=9606 GN=SNRNP200 PE=1 SV=2	SNRNP200	1	0.00280986	59.418	PVYHAITK(1)HSPK	3	-1.2046	1	0.856	1.012	0.936	1.041	1.038	1.066	1.122	0.07568
O75643	971	K	U5 small nuclear ribonucleoprotein 200 kDa helicase OS=Homo sapiens OX=9606 GN=SNRNP200 PE=1 SV=2	SNRNP200	1	0.0120163	83.869	NNLVK(1)YDK	2	1.2385	1	0.878	0.998	1.021	1.073	1.014	1	1.066	0.27538
O75643	2087	K	U5 small nuclear ribonucleoprotein 200 kDa helicase OS=Homo sapiens OX=9606 GN=SNRNP200 PE=1 SV=2	SNRNP200	1	6.94459e-05	136.57	LTLQQK(1)AK	2	-0.17964	1	1.068	0.961	0.95	1.009	1.009	1.016	1.018	0.65048
O75643	285	K	U5 small nuclear ribonucleoprotein 200 kDa helicase OS=Homo sapiens OX=9606 GN=SNRNP200 PE=1 SV=2	SNRNP200	1	0.000695845	91.62	K(1)ADEVLEILK	3	4.1844	2	0.955	0.948	1.078	0.947	1.092	0.987	1.015	0.81382
O75688	12	K	Protein phosphatase 1B OS=Homo sapiens OX=9606 GN=PPM1B PE=1 SV=1	PPM1B	1	0.000235618	104.55	TEK(1)HNAHGAGNGLR	4	0.039064	3	0.962	0.932	1.004	0.968	1.107	1.009	1.064	0.24742
O75792	192	K	Ribonuclease H2 subunit A OS=Homo sapiens OX=9606 GN=RNASEH2A PE=1 SV=2	RNASEH2A	1	0.0224716	85.676	K(1)WQFVEK	2	-1.8318	1	1.062	0.999	1.08	0.957	1.004	0.961	0.93	0.063317
O75794	168	K	Cell division cycle protein 123 homolog OS=Homo sapiens OX=9606 GN=CDC123 PE=1 SV=1	CDC123	1	0.0037008	70.889	K(1)WCELIPGAEFR	2	-0.83438	1	0.98	0.936	0.978	1.059	0.993	1.039	1.068	0.053619
O75821	172	K	Eukaryotic translation initiation factor 3 subunit G OS=Homo sapiens OX=9606 GN=EIF3G PE=1 SV=2	EIF3G	1	0.00201121	63.473	CPYK(1)DTLGPMQK	3	-3.3272	1	0.934	0.921	0.989	0.907	1.057	1.148	1.094	0.30136
O75822	210	K	Eukaryotic translation initiation factor 3 subunit J OS=Homo sapiens OX=9606 GN=EIF3J PE=1 SV=2	EIF3J	1	2.84874e-11	125.97	ITNSLTVLCSEK(1)QK	3	-0.53427	1	1.253	1.289	1.283	0.796	0.844	0.819	0.643	2.021e-05
O75844	470	K	CAAX prenyl protease 1 homolog OS=Homo sapiens OX=9606 GN=ZMPSTE24 PE=1 SV=2	ZMPSTE24	1	0.0194677	77.662	LQALK(1)TMK	2	-0.75424	1
O75844	429	K	CAAX prenyl protease 1 homolog OS=Homo sapiens OX=9606 GN=ZMPSTE24 PE=1 SV=2	ZMPSTE24	1	0.00199995	84.169	AK(1)DLYSALIK	2	-2.485	1	0.854	0.843	0.913	1.054	1.117	1.105	1.255	0.0017191
O75874	236	K	Isocitrate dehydrogenase [NADP] cytoplasmic OS=Homo sapiens OX=9606 GN=IDH1 PE=1 SV=2	IDH1	1	3.90229e-08	145.14	QYK(1)SQFEAQK	2	0.024068	1	1.043	1.044	1.071	1.013	0.946	0.953	0.922	0.02514
O75874	406	K	Isocitrate dehydrogenase [NADP] cytoplasmic OS=Homo sapiens OX=9606 GN=IDH1 PE=1 SV=2	IDH1	1	0.014499	80.688	LGENLK(1)IK	2	1.2306	1	1.051	1.035	0.977	0.976	0.994	1.006	0.972	0.30052
O75874	115	K	Isocitrate dehydrogenase [NADP] cytoplasmic OS=Homo sapiens OX=9606 GN=IDH1 PE=1 SV=2	IDH1	1	6.10699e-05	119.34	EAIICK(1)NIPR	3	-0.24389	2	0.903	0.869	0.892	1.122	1.022	1.102	1.218	0.0030578
O75874	243	K	Isocitrate dehydrogenase [NADP] cytoplasmic OS=Homo sapiens OX=9606 GN=IDH1 PE=1 SV=2	IDH1	1	0.00108837	63.29	SQFEAQK(1)IWYEHR	3	-0.6662	1	0.976	1.001	1.004	0.976	1.024	1.027	1.015	0.46608
O75874	81	K	Isocitrate dehydrogenase [NADP] cytoplasmic OS=Homo sapiens OX=9606 GN=IDH1 PE=1 SV=2	IDH1	1	2.14188e-05	127.83	CATITPDEK(1)R	2	1.4867	1	1.081	1.118	1.127	0.96	0.954	0.885	0.842	0.004003
O75874	87	K	Isocitrate dehydrogenase [NADP] cytoplasmic OS=Homo sapiens OX=9606 GN=IDH1 PE=1 SV=2	IDH1	1	0.0174596	89.698	VEEFK(1)LK	2	-0.012666	1	1.171	1.239	1.073	0.898	0.925	0.872	0.774	0.0048442
O75874	93	K	Isocitrate dehydrogenase [NADP] cytoplasmic OS=Homo sapiens OX=9606 GN=IDH1 PE=1 SV=2	IDH1	1	0.00880057	60.509	QMWK(1)SPNGTIR	2	-0.81309	1	0.974	0.905	1.022	0.999	1.097	0.988	1.063	0.27482
O75874	66	K	Isocitrate dehydrogenase [NADP] cytoplasmic OS=Homo sapiens OX=9606 GN=IDH1 PE=1 SV=2	IDH1	1	0.0112286	97.798	K(1)HNVGVK	2	0.40383	1	1.436	1.413	1.369	0.765	0.688	0.748	0.522	5.5091e-05
O75874	224	K	Isocitrate dehydrogenase [NADP] cytoplasmic OS=Homo sapiens OX=9606 GN=IDH1 PE=1 SV=2	IDH1	1	7.43792e-06	121.24	FK(1)DIFQEIYDK	2	0.44828	2	1.089	1.093	1.07	0.954	0.997	0.899	0.876	0.0123763
O75874	65	K	Isocitrate dehydrogenase [NADP] cytoplasmic OS=Homo sapiens OX=9606 GN=IDH1 PE=1 SV=2	IDH1	1	0.00441888	101.65	DAAEAIK(1)K	2	-1.2017	3	1.236	1.258	1.241	0.86	0.822	0.842	0.676	4.9813e-06
O75874	126	K	Isocitrate dehydrogenase [NADP] cytoplasmic OS=Homo sapiens OX=9606 GN=IDH1 PE=1 SV=2	IDH1	1	1.38163e-06	110.92	LVSGWVK(1)PIIIGR	3	-0.45929	2	0.978	0.982	1.028	0.965	1.069	0.99	1.012	0.76114
O75886	104	K	Signal transducing adapter molecule 2 OS=Homo sapiens OX=9606 GN=STAM2 PE=1 SV=1	STAM2	1	0.011359	65.224	AHPK(1)VCEK	3	-1.4103	1
O75886	343	K	Signal transducing adapter molecule 2 OS=Homo sapiens OX=9606 GN=STAM2 PE=1 SV=1	STAM2	1	1.14404e-05	113.61	K(1)HSELSELNVK	3	0.94257	1	0.999	0.949	0.875	1.066	1.024	1.051	1.113	0.055256
O75909	354	K	Cyclin-K OS=Homo sapiens OX=9606 GN=CCNK PE=1 SV=2	CCNK	1	0.00594075	55.314	AAEPPPPK(1)IPK	3	-0.33172	1
O75909	118	K	Cyclin-K OS=Homo sapiens OX=9606 GN=CCNK PE=1 SV=2	CCNK	1	0.0423097	74.486	DIIK(1)TAR	2	-0.010829	1	1.454	1.363	1.395	0.766	0.703	0.736	0.524	3.5886e-05
O75934	158	K	Pre-mRNA-splicing factor SPF27 OS=Homo sapiens OX=9606 GN=BCAS2 PE=1 SV=1	BCAS2	1	9.15421e-05	97.813	K(1)HIQDLNWQR	3	-0.43345	1	0.92	1.006	0.988	1.05	0.926	1.095	1.054	0.42598
O75934	168	K	Pre-mRNA-splicing factor SPF27 OS=Homo sapiens OX=9606 GN=BCAS2 PE=1 SV=1	BCAS2	1	0.00136531	88.021	K(1)NMQLTAGSK	2	0.90082	2	0.913	0.888	0.95	1.061	1.083	1.042	1.158	0.0028439
O75937	116	K	DnaJ homolog subfamily C member 8 OS=Homo sapiens OX=9606 GN=DNAJC8 PE=1 SV=2	DNAJC8	1	0.00102667	115.57	LLLDQEQK(1)K	3	-1.1347	2	0.878	0.908	0.893	1.123	1.065	1.049	1.208	0.00116249
O75937	40	K	DnaJ homolog subfamily C member 8 OS=Homo sapiens OX=9606 GN=DNAJC8 PE=1 SV=2	DNAJC8	1	0.00137879	82.925	DSVLTSK(1)NQIER	2	-1.0167	1	0.873	0.814	0.854	1.217	1.061	1.057	1.312	0.0059986
O75937	108	K	DnaJ homolog subfamily C member 8 OS=Homo sapiens OX=9606 GN=DNAJC8 PE=1 SV=2	DNAJC8	1	0.00133597	73.951	AYK(1)LLLDQEQK	3	-1.962	1
O75937	135	K	DnaJ homolog subfamily C member 8 OS=Homo sapiens OX=9606 GN=DNAJC8 PE=1 SV=2	DNAJC8	1	0.0121508	53.211	EYVEHTVK(1)ER	3	2.6928	1	0.938	1.059	0.926	1.093	0.982	0.997	1.051	0.40542
O75947	109	K	ATP synthase subunit d, mitochondrial OS=Homo sapiens OX=9606 GN=ATP5PD PE=1 SV=3	ATP5PD	1	3.19512e-08	131.79	SCAEWVSLSK(1)AR	3	-0.75025	2	0.945	0.962	1.009	1.019	1.036	1.018	1.054	0.06058
O75947	149	K	ATP synthase subunit d, mitochondrial OS=Homo sapiens OX=9606 GN=ATP5PD PE=1 SV=3	ATP5PD	1	0.00104526	81.789	K(1)YPYWPHQPIENL	3	0.024116	3	1.089	1.2	1.149	0.927	0.902	0.893	0.792	0.00152229
O75947	63	K	ATP synthase subunit d, mitochondrial OS=Homo sapiens OX=9606 GN=ATP5PD PE=1 SV=3	ATP5PD	1	0.000903594	60.55	ANVAK(1)AGLVDDFEK	3	3.2172	1	1.064	1.122	1.212	0.946	0.936	0.867	0.809	0.0106571
O75947	72	K	ATP synthase subunit d, mitochondrial OS=Homo sapiens OX=9606 GN=ATP5PD PE=1 SV=3	ATP5PD	1	1.33506e-05	129.82	AGLVDDFEK(1)K	2	0.18957	1	1.026	1.134	1.08	0.945	0.93	0.977	0.88	0.0171772
O75964	66	K	ATP synthase subunit g, mitochondrial OS=Homo sapiens OX=9606 GN=ATP5MG PE=1 SV=3	ATP5MG	1	2.39771e-12	121.82	IVNSAQTGSFK(1)QLTVK	3	0.86276	1	1.005	0.957	0.998	1.063	0.856	1.125	1.028	0.81244
O75964	54	K	ATP synthase subunit g, mitochondrial OS=Homo sapiens OX=9606 GN=ATP5MG PE=1 SV=3	ATP5MG	1	0.00642638	89.142	AIQSLK(1)K	2	-0.49634	2	0.955	0.983	0.993	1.026	1.02	1.018	1.045	0.020257
O76003	110	K	Glutaredoxin-3 OS=Homo sapiens OX=9606 GN=GLRX3 PE=1 SV=2	GLRX3	1	0.00205109	66.023	LDGAHAPELTK(1)K	3	-1.8659	1	1.004	1	0.938	0.981	1.096	0.98	1.039	0.43478
O76021	254	K	Ribosomal L1 domain-containing protein 1 OS=Homo sapiens OX=9606 GN=RSL1D1 PE=1 SV=3	RSL1D1	1	0.00711757	91.867	LLFVK(1)TEK	3	0.90005	2	0.946	0.861	1.063	1.046	0.989	1.068	1.081	0.28022
O76021	244	K	Ribosomal L1 domain-containing protein 1 OS=Homo sapiens OX=9606 GN=RSL1D1 PE=1 SV=3	RSL1D1	1	0.00971274	68.536	LPEK(1)WESVK	3	-1.014	2	0.753	0.741	0.645	1.185	1.225	1.19	1.683	0.00048076
O76021	120	K	Ribosomal L1 domain-containing protein 1 OS=Homo sapiens OX=9606 GN=RSL1D1 PE=1 SV=3	RSL1D1	1	0.02093	53.968	LLNK(1)HGIK	3	-0.47951	1	0.567	0.554	0.514	1.332	1.277	1.329	2.409	1.56245e-05
O76021	140	K	Ribosomal L1 domain-containing protein 1 OS=Homo sapiens OX=9606 GN=RSL1D1 PE=1 SV=3	RSL1D1	1	0.00731199	91.549	EYK(1)SYEAK	2	-0.40483	1	0.839	0.943	0.864	1.203	1.008	1.05	1.232	0.031618
O76021	48	K	Ribosomal L1 domain-containing protein 1 OS=Homo sapiens OX=9606 GN=RSL1D1 PE=1 SV=3	RSL1D1	1	9.33261e-07	107.09	AVDALLTHCK(1)SR	3	0.33771	1	0.634	0.806	0.695	1.237	1.264	1.099	1.686	0.0030961
O76054	257	K	SEC14-like protein 2 OS=Homo sapiens OX=9606 GN=SEC14L2 PE=1 SV=1	SEC14L2	1	0.00231369	80.96	SK(1)INYGGDIPR	2	-0.60768	1	1.226	1.262	1.362	0.874	0.778	0.795	0.636	0.00067748
O76094	457	K	Signal recognition particle subunit SRP72 OS=Homo sapiens OX=9606 GN=SRP72 PE=1 SV=3	SRP72	1	0.0156531	79.986	EAANFK(1)LK	2	-0.098802	1	0.875	0.895	0.941	1.003	1.077	1.127	1.183	0.0140614
O94808	17	K	Glutamine--fructose-6-phosphate aminotransferase [isomerizing] 2 OS=Homo sapiens OX=9606 GN=GFPT2 PE=1 SV=3	GFPT2	1	0.00410597	83.862	K(1)EIFETLIK	2	-0.77241	3	0.206	0.199	0.171	1.548	1.576	1.526	8.073	1.7576e-06
O94826	185	K	Mitochondrial import receptor subunit TOM70 OS=Homo sapiens OX=9606 GN=TOMM70 PE=1 SV=1	TOMM70	1	0.00457133	78.342	AVELNPK(1)YVK	3	0.93548	2	0.944	0.934	0.981	1.031	1.054	1.027	1.088	0.0074413
O94826	168	K	Mitochondrial import receptor subunit TOM70 OS=Homo sapiens OX=9606 GN=TOMM70 PE=1 SV=1	TOMM70	1	0.00335333	63.624	AAAFEQLQK(1)WK	3	3.1598	1	0.894	0.996	0.966	1.091	0.993	1.029	1.09	0.11032
O94832	758	K	Unconventional myosin-Id OS=Homo sapiens OX=9606 GN=MYO1D PE=1 SV=2	MYO1D	1	0.0415749	46.426	DYGK(1)HVK	3	0.49802	1	1.085	1.083	0.982	0.994	0.994	0.935	0.928	0.128277
O94901	523	K	SUN domain-containing protein 1 OS=Homo sapiens OX=9606 GN=SUN1 PE=1 SV=3	SUN1	1	6.12935e-12	124.78	HVK(1)TGCETVDAVQER	3	-1.0416	2	1.127	1.085	1.281	0.92	0.92	0.845	0.769	0.0105766
O94903	125	K	Pyridoxal phosphate homeostasis protein OS=Homo sapiens OX=9606 GN=PLPBP PE=1 SV=1	PLPBP	1	0.00149939	85.813	LADK(1)VNSSWQR	2	0.10541	1	0.982	0.965	0.989	1.018	0.984	1.059	1.043	0.139615
O94903	47	K	Pyridoxal phosphate homeostasis protein OS=Homo sapiens OX=9606 GN=PLPBP PE=1 SV=1	PLPBP	1	0.0164683	79.489	LVAVSK(1)TK	2	2.2759	1	0.934	0.895	0.909	1.052	1.11	1.032	1.167	0.0036042
O94905	287	K	Erlin-2 OS=Homo sapiens OX=9606 GN=ERLIN2 PE=1 SV=1	ERLIN2	1	0.00766576	78.342	YK(1)AIASNSK	2	0.25171	1	0.588	0.669	0.666	1.295	1.242	1.207	1.947	0.000141126
O94906	130	K	Pre-mRNA-processing factor 6 OS=Homo sapiens OX=9606 GN=PRPF6 PE=1 SV=1	PRPF6	0.999936	0.0218783	51.567	EKEEIEK(1)YR	3	-0.79866	1
O94906	737	K	Pre-mRNA-processing factor 6 OS=Homo sapiens OX=9606 GN=PRPF6 PE=1 SV=1	PRPF6	1	0.0103309	76.228	EAYNQGLK(1)K	2	1.3533	1	1.112	1.123	1.142	1.005	0.834	0.928	0.819	0.065844
O94906	616	K	Pre-mRNA-processing factor 6 OS=Homo sapiens OX=9606 GN=PRPF6 PE=1 SV=1	PRPF6	1	0.00286923	59.116	AEVLWLMGAK(1)SK	3	-0.23562	1
O94916	259	K	Nuclear factor of activated T-cells 5 OS=Homo sapiens OX=9606 GN=NFAT5 PE=1 SV=1	NFAT5	1	0.038802	41.695	AGNGTLENQK(1)GTGVK(1)K	3	2.9694	1	0.192	0.214	0.198	1.463	1.681	1.483	7.661	1.5626e-06
O94916	264	K	Nuclear factor of activated T-cells 5 OS=Homo sapiens OX=9606 GN=NFAT5 PE=1 SV=1	NFAT5	1	0.038802	41.695	AGNGTLENQK(1)GTGVK(1)K	3	2.9694	1	0.192	0.214	0.198	1.463	1.681	1.483	7.661	1.5626e-06
O94979	647	K	Protein transport protein Sec31A OS=Homo sapiens OX=9606 GN=SEC31A PE=1 SV=3	SEC31A	1	0.00188721	79.492	EIVESCDLK(1)NWR	2	-1.025	1	1.508	1.403	1.547	0.619	0.677	0.736	0.456	0.000164778
O95139	66	K	NADH dehydrogenase [ubiquinone] 1 beta subcomplex subunit 6 OS=Homo sapiens OX=9606 GN=NDUFB6 PE=1 SV=3	NDUFB6	1	0.0111092	67.981	MVHGVYK(1)K	3	-0.85997	2	0.996	0.967	1.017	1.042	0.974	1.015	1.017	0.53042
O95197	998	K	Reticulon-3 OS=Homo sapiens OX=9606 GN=RTN3 PE=1 SV=2	RTN3	1	0.000738101	66.485	YK(1)TQIDHYVGIAR	3	-0.11353	1
O95218	18	K	Zinc finger Ran-binding domain-containing protein 2 OS=Homo sapiens OX=9606 GN=ZRANB2 PE=1 SV=2	ZRANB2	1	0.00803816	53.6	VSDGDWICPDK(1)K	3	-0.46267	1	1.186	1.148	1.3	0.88	0.832	0.88	0.713	0.0012755
O95232	72	K	Luc7-like protein 3 OS=Homo sapiens OX=9606 GN=LUC7L3 PE=1 SV=2	LUC7L3	1	0.0271856	80.787	QYEK(1)SSR	2	2.625	1
O95249	124	K	Golgi SNAP receptor complex member 1 OS=Homo sapiens OX=9606 GN=GOSR1 PE=1 SV=1	GOSR1	1	2.93662e-06	104.95	DILQDYTHEFHK(1)TK	4	0.62103	1	0.768	0.648	0.771	1.278	1.109	1.185	1.633	0.0022039
O95260	202	K	Arginyl-tRNA--protein transferase 1 OS=Homo sapiens OX=9606 GN=ATE1 PE=1 SV=2	ATE1	1	0.000239064	96.113	GADLSK(1)PPCR	2	-1.4612	1	1.585	1.483	1.413	0.649	0.679	0.695	0.451	3.6955e-05
O95292	45	K	Vesicle-associated membrane protein-associated protein B/C OS=Homo sapiens OX=9606 GN=VAPB PE=1 SV=3	VAPB	1	0.0183623	88.819	VK(1)TTAPR	2	0.92096	1	1.883	1.543	1.719	0.5	0.456	0.622	0.307	0.0003986
O95292	43	K	Vesicle-associated membrane protein-associated protein B/C OS=Homo sapiens OX=9606 GN=VAPB PE=1 SV=3	VAPB	1	0.0107878	97.798	NVCFK(1)VK	2	-2.8447	1	1.635	1.469	1.454	0.619	0.725	0.63	0.433	0.000179612
O95292	17	K	Vesicle-associated membrane protein-associated protein B/C OS=Homo sapiens OX=9606 GN=VAPB PE=1 SV=3	VAPB	1	1.12465e-08	110.12	VEQVLSLEPQHELK(1)FR	3	0.52306	1	0.883	0.865	0.877	1.133	1.125	1.016	1.247	0.0035424
O95292	167	K	Vesicle-associated membrane protein-associated protein B/C OS=Homo sapiens OX=9606 GN=VAPB PE=1 SV=3	VAPB	1	0.000325693	83.204	SLSSSLDDTEVK(1)K	3	-0.057137	1	1.089	1.091	1.129	0.918	0.888	0.999	0.848	0.0108243
O95298	114	K	NADH dehydrogenase [ubiquinone] 1 subunit C2 OS=Homo sapiens OX=9606 GN=NDUFC2 PE=1 SV=1	NDUFC2	1	0.000319708	78.964	TYGEIFEK(1)FHPIR	3	-0.088435	1	0.971	0.977	1.119	0.868	1.051	1.042	0.965	0.66036
O95299	338	K	NADH dehydrogenase [ubiquinone] 1 alpha subcomplex subunit 10, mitochondrial OS=Homo sapiens OX=9606 GN=NDUFA10 PE=1 SV=1	NDUFA10	1	0.00267682	55.335	K(1)YSPGYNTEVGDK	3	0.92024	1	0.92	1.01	0.97	1	1.057	1.024	1.062	0.124237
O95336	254	K	6-phosphogluconolactonase OS=Homo sapiens OX=9606 GN=PGLS PE=1 SV=2	PGLS	1	0.0141949	55.261	LLTVPFEK(1)HSTL	2	-0.4687	1	0.864	0.887	1.077	1.147	1.078	0.915	1.11	0.33866
O95347	804	K	Structural maintenance of chromosomes protein 2 OS=Homo sapiens OX=9606 GN=SMC2 PE=1 SV=2	SMC2	1	0.0183525	78.342	TK(1)ADASSK	2	-0.19521	1	1.12	1.098	1.197	0.917	0.939	0.884	0.802	0.0022032
O95347	330	K	Structural maintenance of chromosomes protein 2 OS=Homo sapiens OX=9606 GN=SMC2 PE=1 SV=2	SMC2	1	0.00651328	79.659	NLACEESK(1)R	2	-0.57641	1	1.398	1.397	1.48	0.756	0.744	0.662	0.506	0.00011991
O95347	424	K	Structural maintenance of chromosomes protein 2 OS=Homo sapiens OX=9606 GN=SMC2 PE=1 SV=2	SMC2	1	0.00629535	65.404	LK(1)HAQQELK	3	-0.19019	1
O95347	919	K	Structural maintenance of chromosomes protein 2 OS=Homo sapiens OX=9606 GN=SMC2 PE=1 SV=2	SMC2	1	0.012666	50.194	ELDHNISK(1)HK	4	-1.2362	1	0.89	0.754	0.932	1.164	1.083	1.063	1.285	0.02224
O95347	322	K	Structural maintenance of chromosomes protein 2 OS=Homo sapiens OX=9606 GN=SMC2 PE=1 SV=2	SMC2	1	0.00148969	103.91	K(1)NLACEESK	2	-1.017	1	1.431	1.43	1.457	0.707	0.691	0.732	0.493	1.2116e-06
O95372	108	K	Acyl-protein thioesterase 2 OS=Homo sapiens OX=9606 GN=LYPLA2 PE=1 SV=1	LYPLA2	1	0.000228838	75.764	ALIEHEMK(1)NGIPANR	3	-1.258	1
O95373	119	K	Importin-7 OS=Homo sapiens OX=9606 GN=IPO7 PE=1 SV=1	IPO7	1	0.00944914	40.432	VQLTTCIHHIIK(1)HDYPSR	5	0.022228	1	0.819	0.774	0.756	0.938	1.393	1.118	1.468	0.033542
O95373	312	K	Importin-7 OS=Homo sapiens OX=9606 GN=IPO7 PE=1 SV=1	IPO7	1	0.00271327	111.61	VLYQYK(1)EK	2	-0.28857	1	0.903	0.882	1	1.088	1.049	1.027	1.136	0.037564
O95394	350	K	Phosphoacetylglucosamine mutase OS=Homo sapiens OX=9606 GN=PGM3 PE=1 SV=1	PGM3	1	0.000104868	102.87	VPVYCTK(1)TGVK	2	-0.60219	2	1.291	1.266	1.18	0.873	0.778	0.875	0.676	0.00116263
O95394	244	K	Phosphoacetylglucosamine mutase OS=Homo sapiens OX=9606 GN=PGM3 PE=1 SV=1	PGM3	1	0.0018558	56.29	GK(1)LNHLCGADFVK	3	-0.38676	1
O95394	31	K	Phosphoacetylglucosamine mutase OS=Homo sapiens OX=9606 GN=PGM3 PE=1 SV=1	PGM3	1	0.000218651	85.554	TK(1)AEHLDHVMFR	4	0.20456	3	1.003	1.121	1.054	0.978	0.972	0.948	0.912	0.052943
O95433	194	K	Activator of 90 kDa heat shock protein ATPase homolog 1 OS=Homo sapiens OX=9606 GN=AHSA1 PE=1 SV=1	AHSA1	0.999999	0.000594426	83.615	AKPAPSK(1)TQAR	3	0.02198	1	1.03	0.894	0.958	1.037	1.016	1.048	1.076	0.14854
O95433	273	K	Activator of 90 kDa heat shock protein ATPase homolog 1 OS=Homo sapiens OX=9606 GN=AHSA1 PE=1 SV=1	AHSA1	1	0.0197776	63.287	HIVMK(1)WR	3	-0.72412	1	1.234	1.02	1.118	0.956	0.869	0.949	0.823	0.037384
O95433	208	K	Activator of 90 kDa heat shock protein ATPase homolog 1 OS=Homo sapiens OX=9606 GN=AHSA1 PE=1 SV=1	AHSA1	1	0.0348222	59.84	IPTCK(1)ITLK	2	-0.73136	1	1.058	1.029	1.044	0.971	0.96	0.998	0.935	0.0089394
O95453	223	K	Poly(A)-specific ribonuclease PARN OS=Homo sapiens OX=9606 GN=PARN PE=1 SV=1	PARN	1	1.05122e-05	101.2	YPK(1)GIHVETLETEK	3	-0.14502	1
O95456	264	K	Proteasome assembly chaperone 1 OS=Homo sapiens OX=9606 GN=PSMG1 PE=1 SV=1	PSMG1	1	1.58898e-08	79.875	GLVK(1)NIPQSTEILK	3	0.29364	1
O95470	516	K	Sphingosine-1-phosphate lyase 1 OS=Homo sapiens OX=9606 GN=SGPL1 PE=1 SV=3	SGPL1	0.999818	0.0169299	40.475	ESVTQIMKNPK(1)AK	3	0.9834	1
O95487	849	K	Protein transport protein Sec24B OS=Homo sapiens OX=9606 GN=SEC24B PE=1 SV=2	SEC24B	1	0.000525626	68.168	VVQHLGPATDFYK(1)K	3	-0.68009	1
O95573	220	K	Long-chain-fatty-acid--CoA ligase 3 OS=Homo sapiens OX=9606 GN=ACSL3 PE=1 SV=3	ACSL3	1	0.00561659	94.692	ELLQTK(1)LK	3	0.40317	2	0.723	0.778	0.862	1.082	1.236	1.122	1.456	0.0043219
O95602	203	K	DNA-directed RNA polymerase I subunit RPA1 OS=Homo sapiens OX=9606 GN=POLR1A PE=1 SV=2	POLR1A	1	0.00254634	104.11	AHMNAK(1)R	3	0.91175	1	0.919	0.909	0.836	1.004	1.037	1.198	1.216	0.035577
O95602	543	K	DNA-directed RNA polymerase I subunit RPA1 OS=Homo sapiens OX=9606 GN=POLR1A PE=1 SV=2	POLR1A	1	4.60752e-05	117.86	HVK(1)NGDILLLNR	3	0.38983	1	0.959	1.072	1.172	0.962	0.974	0.94	0.898	0.151116
O95639	133	K	Cleavage and polyadenylation specificity factor subunit 4 OS=Homo sapiens OX=9606 GN=CPSF4 PE=1 SV=1	CPSF4	1	0.00278538	71.614	GFCK(1)HGPLCR	3	-1.4896	1	0.927	0.99	0.982	1.056	1.031	0.999	1.065	0.075001
O95696	981	K	Bromodomain-containing protein 1 OS=Homo sapiens OX=9606 GN=BRD1 PE=1 SV=1	BRD1	1	0.00661482	47.712	IGEHMQTK(1)SDEK	3	1.2824	1
O95696	877	K	Bromodomain-containing protein 1 OS=Homo sapiens OX=9606 GN=BRD1 PE=1 SV=1	BRD1	1	0.0335174	78.149	GK(1)PALVR	2	0.20823	1	1.353	1.137	1.2	0.692	1.025	0.835	0.692	0.038303
O95696	418	K	Bromodomain-containing protein 1 OS=Homo sapiens OX=9606 GN=BRD1 PE=1 SV=1	BRD1	1	0.00333527	96.143	ESSVK(1)TVR	2	-0.4281	2	1.549	1.478	1.482	0.669	0.649	0.686	0.444	1.6456e-06
O95696	331	K	Bromodomain-containing protein 1 OS=Homo sapiens OX=9606 GN=BRD1 PE=1 SV=1	BRD1	1	0.00638692	65.224	LTCYLCK(1)QK	3	1.5605	1	0.969	1.011	0.801	1.01	1.068	1.087	1.138	0.148585
O95747	110	K	Serine/threonine-protein kinase OSR1 OS=Homo sapiens OX=9606 GN=OXSR1 PE=1 SV=1	OXSR1	1	0.00664749	60.398	HIVAK(1)GEHK	4	-0.16349	1	0.844	0.827	0.709	1.087	1.061	1.283	1.442	0.010845
O95757	788	K	Heat shock 70 kDa protein 4L OS=Homo sapiens OX=9606 GN=HSPA4L PE=1 SV=3	HSPA4L	1	4.43922e-05	92.939	ELDNFCNPIIYK(1)PK	3	-0.029361	1	1.387	1.398	1.353	0.761	0.772	0.721	0.545	1.61163e-05
O95758	137	K	Polypyrimidine tract-binding protein 3 OS=Homo sapiens OX=9606 GN=PTBP3 PE=1 SV=2	PTBP3	1	0.00044607	92.039	ELK(1)TDNLPNQAR	2	0.35218	2	0.765	0.793	0.856	1.041	1.149	1.214	1.41	0.0035784
O95782	177	K	AP-2 complex subunit alpha-1 OS=Homo sapiens OX=9606 GN=AP2A1 PE=1 SV=3	AP2A1	1	5.09933e-05	68.41	LYK(1)ASPDLVPMGEWTAR	3	-0.34131	1	0.976	1.017	1.072	0.978	1.024	0.97	0.97	0.39592
O95816	9	K	BAG family molecular chaperone regulator 2 OS=Homo sapiens OX=9606 GN=BAG2 PE=1 SV=1	BAG2	1	0.00341182	86.014	INAK(1)ANEGR	2	-0.71526	1	1.386	1.268	1.281	0.813	0.854	0.728	0.609	0.00082062
O95816	168	K	BAG family molecular chaperone regulator 2 OS=Homo sapiens OX=9606 GN=BAG2 PE=1 SV=1	BAG2	1	5.20849e-12	127.83	FQSIVIGCALEDQK(1)K	4	-1.8073	2	1.244	1.245	1.215	0.83	0.832	0.88	0.686	5.6881e-05
O95831	518	K	Apoptosis-inducing factor 1, mitochondrial OS=Homo sapiens OX=9606 GN=AIFM1 PE=1 SV=1	AIFM1	1	5.47123e-15	123.42	ATAQDNPK(1)SATEQSGTGIR	3	1.6671	1	0.756	0.746	0.778	1.17	1.076	1.255	1.536	0.00075992
O95832	189	K	Claudin-1 OS=Homo sapiens OX=9606 GN=CLDN1 PE=1 SV=1	CLDN1	1	0.0256929	65.056	K(1)TTSYPTPR	2	-0.93702	1	0.983	1.049	1.065	1.001	0.986	0.965	0.953	0.150962
O95834	197	K	Echinoderm microtubule-associated protein-like 2 OS=Homo sapiens OX=9606 GN=EML2 PE=1 SV=1	EML2	1	0.0380965	67.113	ETK(1)VVDVK	2	-0.29647	1
O95834	248	K	Echinoderm microtubule-associated protein-like 2 OS=Homo sapiens OX=9606 GN=EML2 PE=1 SV=1	EML2	0.999133	0.000171505	91.961	QGLFEK(0.999)HEK(0.001)PK	4	0.49738	1	0.945	1.085	0.932	1.056	1.014	0.972	1.027	0.62658
O95858	150	K	Tetraspanin-15 OS=Homo sapiens OX=9606 GN=TSPAN15 PE=1 SV=1	TSPAN15	1	0.000671673	121.9	NIMDFVQK(1)K	2	-0.46164	1	0.453	0.46	0.442	1.365	1.376	1.384	3.044	4.4605e-08
O95861	189	K	3'(2'),5'-bisphosphate nucleotidase 1 OS=Homo sapiens OX=9606 GN=BPNT1 PE=1 SV=1	BPNT1	1	0.000133898	89.507	EVPAGK(1)HIITTTR	3	-0.4449	1	1.095	1.067	1.097	0.895	0.993	0.953	0.872	0.0118564
O95861	49	K	3'(2'),5'-bisphosphate nucleotidase 1 OS=Homo sapiens OX=9606 GN=BPNT1 PE=1 SV=1	BPNT1	1	2.75141e-07	122.78	TCATDLQTK(1)ADR	2	1.0953	1	1.396	1.331	1.283	0.794	0.772	0.774	0.584	3.6167e-05
O95861	303	K	3'(2'),5'-bisphosphate nucleotidase 1 OS=Homo sapiens OX=9606 GN=BPNT1 PE=1 SV=1	BPNT1	1	0.0293766	54.198	VPESIK(1)NALVP	2	2.4182	1
O95861	245	K	3'(2'),5'-bisphosphate nucleotidase 1 OS=Homo sapiens OX=9606 GN=BPNT1 PE=1 SV=1	BPNT1	1	5.24266e-09	110.74	K(1)WDTCAPEVILHAVGGK	3	1.3802	1	1.721	1.691	1.654	0.511	0.555	0.561	0.321	1.7943e-06
O95865	51	K	N(G),N(G)-dimethylarginine dimethylaminohydrolase 2 OS=Homo sapiens OX=9606 GN=DDAH2 PE=1 SV=1	DDAH2	1	0.0201661	48.073	EHGVLGGK(1)LR	3	-0.46757	1	1.075	1.145	0.986	0.896	0.987	0.993	0.897	0.119695
O95983	141	K	Methyl-CpG-binding domain protein 3 OS=Homo sapiens OX=9606 GN=MBD3 PE=1 SV=1	MBD3	1	0.00897946	101.54	QLFWEK(1)K	2	-1.4505	1	0.852	0.866	0.853	1.128	1.112	1.07	1.287	0.000104708
O95994	70	K	Anterior gradient protein 2 homolog OS=Homo sapiens OX=9606 GN=AGR2 PE=1 SV=1	AGR2	1	2.77071e-05	58.952	TSNK(1)PLMIIHHLDECPHSQALK	5	0.62956	1	1.105	0.972	1.071	1.004	1.064	0.857	0.929	0.36932
O95994	165	K	Anterior gradient protein 2 homolog OS=Homo sapiens OX=9606 GN=AGR2 PE=1 SV=1	AGR2	1	1.05377e-26	148.57	LYAYEPADTALLLDNMK(1)K	3	-0.27102	7	0.991	0.985	0.992	1.036	0.989	1.016	1.025	0.151719
O95994	89	K	Anterior gradient protein 2 homolog OS=Homo sapiens OX=9606 GN=AGR2 PE=1 SV=1	AGR2	1	0.0177695	86.67	K(1)VFAENK	3	-1.1854	2	1.067	1.201	1.209	0.945	0.915	0.837	0.776	0.0095953
O96011	118	K	Peroxisomal membrane protein 11B OS=Homo sapiens OX=9606 GN=PEX11B PE=1 SV=1	PEX11B	1	0.0168116	69.786	VDQEK(1)WAQR	2	-1.5793	1	1.076	1.021	1.136	0.901	1.029	0.928	0.884	0.070822
P00326	114	K	Alcohol dehydrogenase 1C OS=Homo sapiens OX=9606 GN=ADH1C PE=1 SV=2	ADH1C	1	0.00909488	42.044	NPESNYCLK(1)NDLGNPR	3	-0.40721	1	0.931	0.908	0.978	0.996	1.124	1.019	1.114	0.067178
P00338	243	K	L-lactate dehydrogenase A chain OS=Homo sapiens OX=9606 GN=LDHA PE=1 SV=2	LDHA	1	3.00059e-05	100.22	QVVESAYEVIK(1)LK	3	0.12266	1	0.847	1.017	1.011	1.036	1.095	0.967	1.078	0.33314
P00338	228	K	L-lactate dehydrogenase A chain OS=Homo sapiens OX=9606 GN=LDHA PE=1 SV=2	LDHA	0.956543	0.0256937	47.302	DK(0.043)EQWK(0.957)EVHK	4	-0.27182	1	0.959	0.922	0.943	1.014	1.05	1.071	1.11	0.0060232
P00338	318	K	L-lactate dehydrogenase A chain OS=Homo sapiens OX=9606 GN=LDHA PE=1 SV=2	LDHA	1	5.89498e-06	124.07	K(1)SADTLWGIQK	2	-1.4609	2	0.94	1.029	0.922	1.099	1.014	0.982	1.071	0.22518
P00338	224	K	L-lactate dehydrogenase A chain OS=Homo sapiens OX=9606 GN=LDHA PE=1 SV=2	LDHA	0.822728	0.000195601	77.746	TLHPDLGTDK(0.177)DK(0.823)EQWK	4	0.50809	1	0.839	0.929	1.206	0.855	1.202	0.963	1.015	0.9127
P00338	222	K	L-lactate dehydrogenase A chain OS=Homo sapiens OX=9606 GN=LDHA PE=1 SV=2	LDHA	1	0.000110087	92.295	TLHPDLGTDK(1)DK	3	0.56364	1	0.676	0.813	0.781	1.204	1.256	1.05	1.546	0.0049956
P00352	362	K	Retinal dehydrogenase 1 OS=Homo sapiens OX=9606 GN=ALDH1A1 PE=1 SV=2	ALDH1A1	1	0.000637306	85.813	ILDLIESGK(1)K	2	0.012769	2	1.138	1.155	1.311	0.91	0.802	0.897	0.724	0.0058164
P00352	412	K	Retinal dehydrogenase 1 OS=Homo sapiens OX=9606 GN=ALDH1A1 PE=1 SV=2	ALDH1A1	1	0.000367244	94.309	FK(1)SLDDVIK	3	0.79176	1	1.089	0.966	0.852	1.052	0.982	1.053	1.062	0.43524
P00352	139	K	Retinal dehydrogenase 1 OS=Homo sapiens OX=9606 GN=ALDH1A1 PE=1 SV=2	ALDH1A1	1	0.00166292	65.241	YCAGWADK(1)IQGR	3	1.1757	1
P00352	260	K	Retinal dehydrogenase 1 OS=Homo sapiens OX=9606 GN=ALDH1A1 PE=1 SV=2	ALDH1A1	1	0.00140196	94.767	EAAGK(1)SNLK	2	-0.16996	1	1.053	1.052	1.116	0.917	0.963	0.985	0.889	0.015163
P00367	457	K	Glutamate dehydrogenase 1, mitochondrial OS=Homo sapiens OX=9606 GN=GLUD1 PE=1 SV=2	GLUD1	1	0.0232251	84.083	LTFK(1)YER	2	-3.3671	1	1.067	1.148	1.206	0.93	0.926	0.877	0.799	0.0051441
P00367	191	K	Glutamate dehydrogenase 1, mitochondrial OS=Homo sapiens OX=9606 GN=GLUD1 PE=1 SV=2	GLUD1	1	4.61907e-05	96.464	INPK(1)NYTDNELEK	3	-0.0086835	1	0.877	0.816	0.915	1.128	1.064	1.093	1.26	0.0034759
P00367	390	K	Glutamate dehydrogenase 1, mitochondrial OS=Homo sapiens OX=9606 GN=GLUD1 PE=1 SV=2	GLUD1	1	0.00143413	104.82	QLTK(1)SNAPR	2	-0.76102	3	0.577	0.559	0.598	0.624	0.77	2.408	2.193	0.29096
P00367	480	K	Glutamate dehydrogenase 1, mitochondrial OS=Homo sapiens OX=9606 GN=GLUD1 PE=1 SV=2	GLUD1	1	1.39499e-06	86.748	FGK(1)HGGTIPIVPTAEFQDR	3	-0.1403	1	1.102	1.29	1.22	0.83	0.984	0.786	0.72	0.0155235
P00387	42	K	NADH-cytochrome b5 reductase 3 OS=Homo sapiens OX=9606 GN=CYB5R3 PE=1 SV=3	CYB5R3	1	4.44137e-06	97.235	STPAITLESPDIK(1)YPLR	3	-0.56367	1	1.172	1.14	1.087	0.863	0.943	0.941	0.808	0.0042982
P00387	115	K	NADH-cytochrome b5 reductase 3 OS=Homo sapiens OX=9606 GN=CYB5R3 PE=1 SV=3	CYB5R3	1	0.0120319	54.982	VYFK(1)DTHPK	3	1.192	1	0.932	0.938	0.949	0.983	1.099	1.054	1.112	0.032842
P00390	401	K	Glutathione reductase, mitochondrial OS=Homo sapiens OX=9606 GN=GSR PE=1 SV=2	GSR	1	0.00277252	88.596	LFEYK(1)EDSK	2	-3.2588	1	0.907	0.989	0.984	0.988	1.062	1.043	1.074	0.113381
P00390	470	K	Glutathione reductase, mitochondrial OS=Homo sapiens OX=9606 GN=GSR PE=1 SV=2	GSR	1	0.00839172	77.662	MVCANK(1)EEK	2	1.8422	1	1.889	1.889	1.721	0.46	0.463	0.417	0.244	3.3348e-06
P00390	164	K	Glutathione reductase, mitochondrial OS=Homo sapiens OX=9606 GN=GSR PE=1 SV=2	GSR	1	0.000176347	55.437	LNAIYQNNLTK(1)SHIEIIR	3	-0.92201	1	1.164	1.018	0.92	1.026	0.938	0.994	0.954	0.5829
P00441	123	K	Superoxide dismutase [Cu-Zn] OS=Homo sapiens OX=9606 GN=SOD1 PE=1 SV=2	SOD1	1	3.55152e-05	98.943	TLVVHEK(1)ADDLGK	2	0.69384	2	0.883	0.993	0.825	1.12	1.082	1.02	1.193	0.04216
P00441	71	K	Superoxide dismutase [Cu-Zn] OS=Homo sapiens OX=9606 GN=SOD1 PE=1 SV=2	SOD1	0.999574	0.0320804	43.897	K(1)HGGPKDEER	4	-0.1509	1	0.983	0.978	0.912	1.131	0.852	1.124	1.081	0.50578
P00441	76	K	Superoxide dismutase [Cu-Zn] OS=Homo sapiens OX=9606 GN=SOD1 PE=1 SV=2	SOD1	0.999779	0.00319308	72.2	KHGGPK(1)DEER	4	-0.12032	1	0.885	1.006	0.943	1.16	0.997	0.978	1.106	0.20354
P00491	22	K	Purine nucleoside phosphorylase OS=Homo sapiens OX=9606 GN=PNP PE=1 SV=2	PNP	1	1.4646e-07	115.12	NTAEWLLSHTK(1)HR	4	-0.081895	1	1.037	0.96	1.083	0.988	1.01	0.967	0.963	0.37908
P00492	166	K	Hypoxanthine-guanine phosphoribosyltransferase OS=Homo sapiens OX=9606 GN=HPRT1 PE=1 SV=2	HPRT1	1	0.0113589	85.67	VASLLVK(1)R	2	-0.075232	1	0.992	1.011	0.925	0.99	1.073	1.003	1.047	0.27792
P00492	103	K	Hypoxanthine-guanine phosphoribosyltransferase OS=Homo sapiens OX=9606 GN=HPRT1 PE=1 SV=2	HPRT1	1	1.35478e-10	124.25	LK(1)SYCNDQSTGDIK	3	-0.080098	3	1.179	1.169	1.178	0.891	0.88	0.893	0.756	3.8361e-07
P00492	213	K	Hypoxanthine-guanine phosphoribosyltransferase OS=Homo sapiens OX=9606 GN=HPRT1 PE=1 SV=2	HPRT1	1	0.000109926	87.99	DLNHVCVISETGK(1)AK	3	-1.6065	1	1.108	0.992	1.078	0.978	0.954	0.969	0.913	0.057018
P00492	175	K	Hypoxanthine-guanine phosphoribosyltransferase OS=Homo sapiens OX=9606 GN=HPRT1 PE=1 SV=2	HPRT1	1	0.000346612	60.764	SVGYK(1)PDFVGFEIPDK	3	-0.36592	1	0.946	1.031	1.061	0.984	1.013	0.992	0.984	0.6917
P00505	159	K	Aspartate aminotransferase, mitochondrial OS=Homo sapiens OX=9606 GN=GOT2 PE=1 SV=3	GOT2	1	7.05427e-10	118.31	DVFLPK(1)PTWGNHTPIFR	3	0.59331	3	1.172	1.134	1.134	0.886	0.989	0.85	0.792	0.0072203
P00505	363	K	Aspartate aminotransferase, mitochondrial OS=Homo sapiens OX=9606 GN=GOT2 PE=1 SV=3	GOT2	1	0.000412906	118.9	TQLVSNLK(1)K	3	-0.34265	2	1.076	1.098	1.073	0.993	0.955	0.906	0.879	0.0092563
P00505	234	K	Aspartate aminotransferase, mitochondrial OS=Homo sapiens OX=9606 GN=GOT2 PE=1 SV=3	GOT2	1	0.00187542	96.492	EIATVVK(1)K	3	1.0356	2	1.079	1.084	1.066	1.01	0.903	0.954	0.888	0.067005
P00505	338	K	Aspartate aminotransferase, mitochondrial OS=Homo sapiens OX=9606 GN=GOT2 PE=1 SV=3	GOT2	1	0.0055075	96.342	K(1)QWLQEVK	2	0.092306	1	1.177	1.124	1.044	0.92	0.936	0.931	0.833	0.035861
P00505	73	K	Aspartate aminotransferase, mitochondrial OS=Homo sapiens OX=9606 GN=GOT2 PE=1 SV=3	GOT2	1	0.00051065	95.822	DDNGK(1)PYVLPSVR	2	-0.12111	2	1.076	1.094	1.121	0.961	0.938	0.924	0.858	0.00074288
P00505	122	K	Aspartate aminotransferase, mitochondrial OS=Homo sapiens OX=9606 GN=GOT2 PE=1 SV=3	GOT2	1	3.18198e-34	166.29	ASAELALGENSEVLK(1)SGR	2	-0.59576	2	0.858	0.822	0.963	1.112	1.051	1.095	1.233	0.0136038
P00505	82	K	Aspartate aminotransferase, mitochondrial OS=Homo sapiens OX=9606 GN=GOT2 PE=1 SV=3	GOT2	1	0.00146412	96.229	K(1)AEAQIAAK	2	1.1075	1	1.194	1.087	1.149	0.897	0.903	0.929	0.796	0.00146478
P00558	11	K	Phosphoglycerate kinase 1 OS=Homo sapiens OX=9606 GN=PGK1 PE=1 SV=3	PGK1	1	0.0015966	93.345	LTLDK(1)LDVK	3	0.45347	2	0.885	0.937	1.004	1.019	1.034	1.079	1.108	0.061577
P00558	131	K	Phosphoglycerate kinase 1 OS=Homo sapiens OX=9606 GN=PGK1 PE=1 SV=3	PGK1	1	4.0621e-05	122.69	FHVEEEGK(1)GK	3	-0.46992	2	0.882	0.877	0.816	1.103	1.092	1.111	1.284	0.00060234
P00558	139	K	Phosphoglycerate kinase 1 OS=Homo sapiens OX=9606 GN=PGK1 PE=1 SV=3	PGK1	1	0.00460647	99.815	DASGNK(1)VK	2	-0.22151	1	0.841	0.836	0.867	1.136	1.084	1.106	1.307	0.000104789
P00558	91	K	Phosphoglycerate kinase 1 OS=Homo sapiens OX=9606 GN=PGK1 PE=1 SV=3	PGK1	1	1.63399e-14	127.02	SLLGK(1)DVLFLK	2	0.43264	1
P00558	267	K	Phosphoglycerate kinase 1 OS=Homo sapiens OX=9606 GN=PGK1 PE=1 SV=3	PGK1	1	0.00579316	76.064	IVK(1)DLMSK	3	-0.20008	1	0.978	0.989	0.93	1.105	0.966	1.021	1.067	0.2141
P00558	322	K	Phosphoglycerate kinase 1 OS=Homo sapiens OX=9606 GN=PGK1 PE=1 SV=3	PGK1	1	1.926e-17	106.88	TGQATVASGIPAGWMGLDCGPESSK(1)K	4	0.070404	3	1.328	1.221	1.252	0.84	0.834	0.808	0.653	0.000101617
P00558	48	K	Phosphoglycerate kinase 1 OS=Homo sapiens OX=9606 GN=PGK1 PE=1 SV=3	PGK1	1	1.52822e-22	153.39	AAVPSIK(1)FCLDNGAK	2	-0.30907	3	1.134	1.134	1.185	0.895	0.958	0.86	0.786	0.0022378
P00558	353	K	Phosphoglycerate kinase 1 OS=Homo sapiens OX=9606 GN=PGK1 PE=1 SV=3	PGK1	1	4.60021e-05	96.745	GTK(1)ALMDEVVK	3	0.023033	2	1.078	1.13	1.122	0.927	0.918	0.948	0.839	0.00055541
P00558	30	K	Phosphoglycerate kinase 1 OS=Homo sapiens OX=9606 GN=PGK1 PE=1 SV=3	PGK1	1	2.89347e-14	129.88	VDFNVPMK(1)NNQITNNQR	3	-0.37837	9	0.982	1.015	0.986	1.001	1.012	1.016	1.015	0.24542
P00558	272	K	Phosphoglycerate kinase 1 OS=Homo sapiens OX=9606 GN=PGK1 PE=1 SV=3	PGK1	1	0.00847978	70.552	DLMSK(1)AEK	3	-0.29088	2	1.016	1.007	1.056	0.985	0.982	0.996	0.962	0.065842
P00558	156	K	Phosphoglycerate kinase 1 OS=Homo sapiens OX=9606 GN=PGK1 PE=1 SV=3	PGK1	1	7.39006e-07	71.853	ASLSK(1)LGDVYVNDAFGTAHR	3	-1.5343	1	0.904	0.798	0.857	1.019	1.139	1.156	1.295	0.0086203
P00558	75	K	Phosphoglycerate kinase 1 OS=Homo sapiens OX=9606 GN=PGK1 PE=1 SV=3	PGK1	1	1.34881e-05	65.855	PDGVPMPDK(1)YSLEPVAVELK	3	-0.40373	1	1.116	1.121	0.915	0.982	0.939	0.999	0.926	0.35596
P00558	291	K	Phosphoglycerate kinase 1 OS=Homo sapiens OX=9606 GN=PGK1 PE=1 SV=3	PGK1	1	7.10791e-20	135.23	ITLPVDFVTADK(1)FDENAK	3	0.62465	1	1.06	1.094	1.028	0.954	0.988	0.953	0.91	0.01184
P00558	97	K	Phosphoglycerate kinase 1 OS=Homo sapiens OX=9606 GN=PGK1 PE=1 SV=3	PGK1	1	8.36005e-22	151.04	DVLFLK(1)DCVGPEVEK	4	-0.086536	3	1.557	1.509	1.541	0.64	0.644	0.652	0.42	6.9766e-08
P00558	192	K	Phosphoglycerate kinase 1 OS=Homo sapiens OX=9606 GN=PGK1 PE=1 SV=3	PGK1	1	0.0356549	68.657	K(1)ELNYFAK	3	-0.018617	2	0.886	0.936	0.929	1.062	1.084	1.038	1.157	0.0023391
P00558	146	K	Phosphoglycerate kinase 1 OS=Homo sapiens OX=9606 GN=PGK1 PE=1 SV=3	PGK1	1	0.0287523	58.476	AEPAK(1)IEAFR	2	-0.13369	1	0.913	1.089	0.939	0.967	1.028	1.054	1.037	0.55884
P00558	279	K	Phosphoglycerate kinase 1 OS=Homo sapiens OX=9606 GN=PGK1 PE=1 SV=3	PGK1	1	0.00159585	94.569	NGVK(1)ITLPVDFVTADK	3	1.93	1	0.799	0.832	0.877	1.123	1.147	1.079	1.335	0.00086211
P00558	56	K	Phosphoglycerate kinase 1 OS=Homo sapiens OX=9606 GN=PGK1 PE=1 SV=3	PGK1	1	8.12931e-20	118.63	FCLDNGAK(1)SVVLMSHLGRPDGVPMPDK	4	-0.033888	2	1.099	1.266	1.348	0.858	0.859	0.816	0.682	0.0037795
P00558	382	K	Phosphoglycerate kinase 1 OS=Homo sapiens OX=9606 GN=PGK1 PE=1 SV=3	PGK1	1	4.45803e-08	69.088	GCITIIGGGDTATCCAK(1)WNTEDK	3	-1.4741	1	1.353	1.473	1.382	0.66	0.736	0.8	0.522	0.00043979
P00568	166	K	Adenylate kinase isoenzyme 1 OS=Homo sapiens OX=9606 GN=AK1 PE=1 SV=3	AK1	1	0.00988359	61.042	ATEPVIAFYEK(1)R	2	1.8608	1
P00740	446	K	Coagulation factor IX OS=Homo sapiens OX=9606 GN=F9 PE=1 SV=2	F9	1	0.00440376	82.008	YGIYTK(1)VSR	2	-0.90947	1	0.619	0.527	0.554	1.289	1.3	1.305	2.291	0.0032782
P00742	181	K	Coagulation factor X OS=Homo sapiens OX=9606 GN=F10 PE=1 SV=2	F10	1	0.0381643	40.067	QTLERRK(1)R	3	-2.8378	1	1.268	1.143	1.116	0.777	0.914	0.97	0.754	0.020942
P00918	167	K	Carbonic anhydrase 2 OS=Homo sapiens OX=9606 GN=CA2 PE=1 SV=2	CA2	1	0.00126733	86.262	VVDVLDSIK(1)TK	3	0.36871	2	0.984	0.977	0.974	1.034	1.011	1.019	1.044	0.00406
P00918	171	K	Carbonic anhydrase 2 OS=Homo sapiens OX=9606 GN=CA2 PE=1 SV=2	CA2	1	0.00135025	83.204	GK(1)SADFTNFDPR	2	-0.42668	1	0.941	0.931	0.869	1.042	1.104	1.047	1.165	0.0079194
P00918	113	K	Carbonic anhydrase 2 OS=Homo sapiens OX=9606 GN=CA2 PE=1 SV=2	CA2	1	0.00044854	70.197	K(1)YAAELHLVHWNTK	4	-0.80135	1	0.965	0.923	0.994	1.062	0.984	1.05	1.074	0.089563
P00966	408	K	Argininosuccinate synthase OS=Homo sapiens OX=9606 GN=ASS1 PE=1 SV=2	ASS1	1	0.00890495	88.948	LQSK(1)VTAK	2	-0.57142	1	0.924	0.904	0.976	1.04	1.099	1.011	1.123	0.025481
P00966	340	K	Argininosuccinate synthase OS=Homo sapiens OX=9606 GN=ASS1 PE=1 SV=2	ASS1	1	1.39584e-05	141.29	HCIAK(1)SQER	3	-1.5444	4	1.294	1.428	1.338	0.793	0.786	0.725	0.567	0.000156695
P00966	121	K	Argininosuccinate synthase OS=Homo sapiens OX=9606 GN=ASS1 PE=1 SV=2	ASS1	1	1.05733e-06	105.58	YVSHGATGK(1)GNDQVR	3	0.5331	2	0.815	0.792	2.753	0.577	0.878	0.61	0.474	0.2477
P02458	1444	K	Collagen alpha-1(II) chain OS=Homo sapiens OX=9606 GN=COL2A1 PE=1 SV=3	COL2A1	1	0.014601	68.915	HTGK(1)WGK	3	-0.79413	1	0.434	0.395	0.388	1.483	1.302	1.437	3.469	1.93387e-05
P02545	233	K	Prelamin-A/C OS=Homo sapiens OX=9606 GN=LMNA PE=1 SV=1	LMNA	1	0.00375808	73.435	LVEIDNGK(1)QR	3	-0.46712	2	1.071	1.066	0.963	0.961	1.065	0.927	0.953	0.41542
P02545	180	K	Prelamin-A/C OS=Homo sapiens OX=9606 GN=LMNA PE=1 SV=1	LMNA	1	0.000309747	101.71	LEAALGEAK(1)K	2	-0.57786	2	0.955	0.934	0.846	1.058	1.074	1.065	1.169	0.052323
P02545	155	K	Prelamin-A/C OS=Homo sapiens OX=9606 GN=LMNA PE=1 SV=1	LMNA	1	0.00120385	71.806	EAALSTALSEK(1)R	3	0.47783	1	1.108	1.077	1.471	0.888	0.862	0.822	0.704	0.028523
P02545	265	K	Prelamin-A/C OS=Homo sapiens OX=9606 GN=LMNA PE=1 SV=1	LMNA	1	0.00142898	103.21	ELEK(1)TYSAK	2	-0.082434	1	1.083	1.048	1.085	0.997	0.96	0.919	0.894	0.0126622
P02545	470	K	Prelamin-A/C OS=Homo sapiens OX=9606 GN=LMNA PE=1 SV=1	LMNA	1	2.08177e-13	136.81	SNEDQSMGNWQIK(1)R	2	-0.88126	2	0.958	0.973	0.831	1.03	1.092	1.056	1.151	0.054678
P02545	108	K	Prelamin-A/C OS=Homo sapiens OX=9606 GN=LMNA PE=1 SV=1	LMNA	1	0.00430261	82.417	LQLELSK(1)VR	2	3.3956	1	0.882	0.764	0.964	1.084	1.118	1.078	1.257	0.027501
P02545	260	K	Prelamin-A/C OS=Homo sapiens OX=9606 GN=LMNA PE=1 SV=1	LMNA	1	7.94795e-07	112.44	AQHEDQVEQYK(1)K	3	-0.59324	1	0.856	0.766	0.845	1.108	1.139	1.131	1.369	0.00093948
P02545	135	K	Prelamin-A/C OS=Homo sapiens OX=9606 GN=LMNA PE=1 SV=1	LMNA	1	0.00132365	86.944	LK(1)DLEALLNSK	2	-0.70035	1	0.824	0.864	0.931	1.103	1.129	1.042	1.25	0.0063622
P02749	303	K	Beta-2-glycoprotein 1 OS=Homo sapiens OX=9606 GN=APOH PE=1 SV=3	APOH	1	7.12912e-09	145.31	VSFFCK(1)NK(1)EK	2	-0.45882	1	0.064	0.074	0.091	1.696	1.57	1.621	21.341	4.0011e-06
P02749	301	K	Beta-2-glycoprotein 1 OS=Homo sapiens OX=9606 GN=APOH PE=1 SV=3	APOH	1	7.12912e-09	145.31	VSFFCK(1)NK(1)EK	2	-0.45882	7	0.214	0.222	0.222	1.585	1.496	1.517	6.988	4.3035e-08
P02753	107	K	Retinol-binding protein 4 OS=Homo sapiens OX=9606 GN=RBP4 PE=1 SV=3	RBP4	1	0.000780174	73.881	MK(1)YWGVASFLQK	3	-0.60003	1	0.627	0.685	0.692	1.249	1.248	1.193	1.841	6.0848e-05
P02765	225	K	Alpha-2-HS-glycoprotein OS=Homo sapiens OX=9606 GN=AHSG PE=1 SV=2	AHSG	1	1.71027e-17	156.24	CNLLAEK(1)QYGFCK	3	-0.271	5	0.509	0.493	0.523	1.376	1.357	1.282	2.633	1.9636e-06
P02766	35	K	Transthyretin OS=Homo sapiens OX=9606 GN=TTR PE=1 SV=1	TTR	1	0.000121362	100.38	CPLMVK(1)VLDAVR	2	0.51512	2	0.889	0.869	0.817	1.126	1.058	1.123	1.284	0.00150492
P02766	96	K	Transthyretin OS=Homo sapiens OX=9606 GN=TTR PE=1 SV=1	TTR	1	9.62145e-21	174.24	VEIDTK(1)SYWK	2	0.52001	2	0.318	0.326	0.304	1.477	1.456	1.466	4.64	1.0218e-07
P02786	189	K	Transferrin receptor protein 1 OS=Homo sapiens OX=9606 GN=TFRC PE=1 SV=2	TFRC	1	0.00100577	79.659	DQHFVK(1)IQVK	3	2.1537	1	0.839	1.027	0.998	0.933	1.112	1.053	1.082	0.38422
P03928	54	K	ATP synthase protein 8 OS=Homo sapiens OX=9606 GN=MT-ATP8 PE=1 SV=1	MT-ATP8	0.999672	0.00158808	67.136	NYNKPWEPK(1)WTK	3	-0.46226	1	1.071	1.01	1.112	0.975	0.983	0.931	0.905	0.038276
P04040	243	K	Catalase OS=Homo sapiens OX=9606 GN=CAT PE=1 SV=3	CAT	1	2.7942e-34	172.56	TDQGIK(1)NLSVEDAAR	3	2.6235	3	1.123	1.235	1.285	0.853	0.876	0.851	0.708	0.00111729
P04040	237	K	Catalase OS=Homo sapiens OX=9606 GN=CAT PE=1 SV=3	CAT	1	4.05874e-05	122.7	FHYK(1)TDQGIK	2	-0.70446	2	1.088	1.162	1.147	0.947	0.889	0.912	0.809	0.00147515
P04040	98	K	Catalase OS=Homo sapiens OX=9606 GN=CAT PE=1 SV=3	CAT	1	0.0047527	68.557	AK(1)VFEHIGK	3	-1.6516	1	0.836	0.804	0.964	1.031	1.122	1.125	1.259	0.02012
P04040	476	K	Catalase OS=Homo sapiens OX=9606 GN=CAT PE=1 SV=3	CAT	1	0.0244285	51.445	DAQIFIQK(1)K	3	0.50673	1	0.911	1.005	1.06	1.05	0.999	0.984	1.019	0.69376
P04040	169	K	Catalase OS=Homo sapiens OX=9606 GN=CAT PE=1 SV=3	CAT	1	0.00143382	58.32	DPILFPSFIHSQK(1)R	3	-0.56326	1	0.703	0.652	0.86	1.076	1.63	0.842	1.602	0.103778
P04040	105	K	Catalase OS=Homo sapiens OX=9606 GN=CAT PE=1 SV=3	CAT	1	0.0135228	67.169	VFEHIGK(1)K	3	3.0911	1	0.934	0.848	1.025	1.026	1.084	1.037	1.121	0.110436
P04075	147	K	Fructose-bisphosphate aldolase A OS=Homo sapiens OX=9606 GN=ALDOA PE=1 SV=2	ALDOA	1	0.00514169	83.182	DGADFAK(1)WR	2	-0.21987	4	1.158	1.216	1.124	0.906	0.889	0.887	0.767	0.00037767
P04075	28	K	Fructose-bisphosphate aldolase A OS=Homo sapiens OX=9606 GN=ALDOA PE=1 SV=2	ALDOA	1	2.49531e-07	92.474	IVAPGK(1)GILAADESTGSIAK	3	-0.55454	1	1.02	0.983	1.048	1.006	1.006	0.973	0.978	0.37358
P04075	330	K	Fructose-bisphosphate aldolase A OS=Homo sapiens OX=9606 GN=ALDOA PE=1 SV=2	ALDOA	1	3.08672e-06	143.03	AAQEEYVK(1)R	2	-0.37085	6	1.278	1.257	1.209	0.838	0.869	0.813	0.673	9.8847e-05
P04075	108	K	Fructose-bisphosphate aldolase A OS=Homo sapiens OX=9606 GN=ALDOA PE=1 SV=2	ALDOA	1	0.000445929	92.866	GGVVGIK(1)VDK	2	0.15856	1	0.727	0.722	0.837	1.193	1.157	1.149	1.531	0.00098334
P04075	42	K	Fructose-bisphosphate aldolase A OS=Homo sapiens OX=9606 GN=ALDOA PE=1 SV=2	ALDOA	1	1.69395e-62	214.45	GILAADESTGSIAK(1)R	3	0.48095	2	0.802	0.806	0.84	1.171	1.064	1.155	1.385	0.00061976
P04075	200	K	Fructose-bisphosphate aldolase A OS=Homo sapiens OX=9606 GN=ALDOA PE=1 SV=2	ALDOA	1	1.06057e-28	125	YASICQQNGIVPIVEPEILPDGDHDLK(1)R	3	-1.6772	8	0.693	0.577	0.681	1.214	1.249	1.262	1.909	0.00039957
P04075	99	K	Fructose-bisphosphate aldolase A OS=Homo sapiens OX=9606 GN=ALDOA PE=1 SV=2	ALDOA	1	1.49494e-05	100.11	PFPQVIK(1)SK	3	-1.7718	9	0.996	1.02	0.939	1.035	1.004	1.01	1.032	0.2927
P04075	312	K	Fructose-bisphosphate aldolase A OS=Homo sapiens OX=9606 GN=ALDOA PE=1 SV=2	ALDOA	1	8.05238e-17	146.77	ALQASALK(1)AWGGK	2	-0.70376	1	1.126	1.135	1.06	0.92	0.895	0.986	0.843	0.0090243
P04075	101	K	Fructose-bisphosphate aldolase A OS=Homo sapiens OX=9606 GN=ALDOA PE=1 SV=2	ALDOA	1	0.00141145	97.734	SK(1)GGVVGIK	3	-0.24734	2	1.12	1.042	1.055	0.963	0.955	0.957	0.894	0.037896
P04075	13	K	Fructose-bisphosphate aldolase A OS=Homo sapiens OX=9606 GN=ALDOA PE=1 SV=2	ALDOA	1	7.31414e-13	136.6	PYQYPALTPEQK(1)K	3	1.7194	5	0.843	0.92	0.751	1.183	0.979	1.185	1.331	0.029784
P04075	140	K	Fructose-bisphosphate aldolase A OS=Homo sapiens OX=9606 GN=ALDOA PE=1 SV=2	ALDOA	1	0.0246193	73.499	K(1)DGADFAK	3	0.18494	2	1.579	1.444	1.418	0.69	0.684	0.679	0.462	0.00189588
P04080	39	K	Cystatin-B OS=Homo sapiens OX=9606 GN=CSTB PE=1 SV=2	CSTB	1	5.28565e-07	135.8	FPVFK(1)AVSFK	3	-0.21834	2	0.937	0.957	0.903	1.099	1.014	1.044	1.129	0.0141003
P04080	91	K	Cystatin-B OS=Homo sapiens OX=9606 GN=CSTB PE=1 SV=2	CSTB	1	0.02826	63.216	AK(1)HDELTYF	2	0.13666	3	0.99	1.004	1.009	0.962	0.964	1.084	1.002	0.9861
P04080	44	K	Cystatin-B OS=Homo sapiens OX=9606 GN=CSTB PE=1 SV=2	CSTB	1	1.78221e-06	103.13	AVSFK(1)SQVVAGTNYFIK	3	0.11336	1	1.092	1.071	1.062	0.903	1	0.961	0.888	0.0178606
P04083	274	K	Annexin A1 OS=Homo sapiens OX=9606 GN=ANXA1 PE=1 SV=2	ANXA1	1	0.000152749	98.592	CATSK(1)PAFFAEK	2	1.6949	1	1.168	1.107	1.325	0.797	0.933	0.878	0.724	0.0102359
P04083	312	K	Annexin A1 OS=Homo sapiens OX=9606 GN=ANXA1 PE=1 SV=2	ANXA1	1	1.59382e-36	187.16	SEIDMNDIK(1)AFYQK	2	-0.44137	3	1.123	1.105	1.144	0.959	0.898	0.913	0.821	0.00088068
P04083	71	K	Annexin A1 OS=Homo sapiens OX=9606 GN=ANXA1 PE=1 SV=2	ANXA1	1	1.87002e-29	181.26	GVDEATIIDILTK(1)R	2	0.6646	2	0.903	0.861	0.902	1.075	1.097	1.071	1.216	0.00035553
P04083	245	K	Annexin A1 OS=Homo sapiens OX=9606 GN=ANXA1 PE=1 SV=2	ANXA1	1	0.0191564	54.982	YSK(1)HDMNK	3	0.38136	2	0.87	0.816	0.853	1.135	1.084	1.111	1.312	0.00030116
P04083	239	K	Annexin A1 OS=Homo sapiens OX=9606 GN=ANXA1 PE=1 SV=2	ANXA1	1	0.0385225	76.064	VFQK(1)YTK	2	-0.55735	1	0.802	0.841	0.925	1.122	1.109	1.077	1.288	0.004301
P04083	250	K	Annexin A1 OS=Homo sapiens OX=9606 GN=ANXA1 PE=1 SV=2	ANXA1	1	0.000228999	89.231	HDMNK(1)VLDLELK	3	-0.026207	3	0.937	0.918	0.937	1.026	1.057	1.071	1.13	0.00107764
P04179	130	K	Superoxide dismutase [Mn], mitochondrial OS=Homo sapiens OX=9606 GN=SOD2 PE=1 SV=3	SOD2	1	0.00142151	100.88	DFGSFDK(1)FK	3	0.0043118	2	1.112	1.027	0.972	0.95	1.03	0.966	0.947	0.31054
P04179	68	K	Superoxide dismutase [Mn], mitochondrial OS=Homo sapiens OX=9606 GN=SOD2 PE=1 SV=3	SOD2	1	5.59281e-14	115.57	HHAAYVNNLNVTEEK(1)YQEALAK	4	-0.24809	1	1.032	1.085	1.066	0.95	0.908	1.033	0.908	0.074016
P04179	122	K	Superoxide dismutase [Mn], mitochondrial OS=Homo sapiens OX=9606 GN=SOD2 PE=1 SV=3	SOD2	1	0.0335713	61.161	GELLEAIK(1)R	2	1.0634	1	0.618	0.739	0.738	1.507	1.347	0.796	1.742	0.063821
P04181	102	K	Ornithine aminotransferase, mitochondrial OS=Homo sapiens OX=9606 GN=OAT PE=1 SV=1	OAT	1	0.000784701	90.412	IVNALK(1)SQVDK	2	0.13744	2	0.953	1.015	0.96	1.04	1.033	0.995	1.048	0.124501
P04183	180	K	Thymidine kinase, cytosolic OS=Homo sapiens OX=9606 GN=TK1 PE=1 SV=2	TK1	1	0.000116501	68.329	EVEVIGGADK(1)YHSVCR	3	0.88036	1	0.878	0.875	0.963	1.129	1.059	1.024	1.183	0.0167841
P04406	334	K	Glyceraldehyde-3-phosphate dehydrogenase OS=Homo sapiens OX=9606 GN=GAPDH PE=1 SV=3	GAPDH	1	0.00168642	71.176	VVDLMAHMASK(1)E	2	-0.54986	4	0.878	0.884	0.902	1.07	1.075	1.097	1.217	6.0399e-05
P04406	194	K	Glyceraldehyde-3-phosphate dehydrogenase OS=Homo sapiens OX=9606 GN=GAPDH PE=1 SV=3	GAPDH	1	3.62534e-05	99.973	TVDGPSGK(1)LWR	3	0.27203	2	0.944	0.979	1.068	1.026	1.022	0.975	1.011	0.78458
P04406	139	K	Glyceraldehyde-3-phosphate dehydrogenase OS=Homo sapiens OX=9606 GN=GAPDH PE=1 SV=3	GAPDH	1	1.51701e-23	128.09	VIISAPSADAPMFVMGVNHEK(1)YDNSLK	5	0.076479	10	0.911	0.972	0.924	1.055	1.046	1.046	1.121	0.028741
P04406	61	K	Glyceraldehyde-3-phosphate dehydrogenase OS=Homo sapiens OX=9606 GN=GAPDH PE=1 SV=3	GAPDH	1	0.000318181	84.198	FHGTVK(1)AENGK	3	-0.081506	3	1.018	0.988	1.001	0.923	1.099	0.988	1.001	0.97786
P04406	254	K	Glyceraldehyde-3-phosphate dehydrogenase OS=Homo sapiens OX=9606 GN=GAPDH PE=1 SV=3	GAPDH	1	1.42593e-05	110.38	PAK(1)YDDIK	2	-0.60524	9	1.102	1.163	1.043	0.94	0.901	0.968	0.849	0.0124249
P04406	219	K	Glyceraldehyde-3-phosphate dehydrogenase OS=Homo sapiens OX=9606 GN=GAPDH PE=1 SV=3	GAPDH	1	1.39282e-09	115.12	AVGK(1)VIPELNGK	3	0.44175	4	1.123	1.044	1.054	0.923	0.99	0.957	0.891	0.0195596
P04406	117	K	Glyceraldehyde-3-phosphate dehydrogenase OS=Homo sapiens OX=9606 GN=GAPDH PE=1 SV=3	GAPDH	1	3.21754e-05	113.93	AGAHLQGGAK(1)R	2	0.14299	4	1.013	1.1	0.888	1.038	0.973	1.008	1.006	0.8912
P04406	5	K	Glyceraldehyde-3-phosphate dehydrogenase OS=Homo sapiens OX=9606 GN=GAPDH PE=1 SV=3	GAPDH	1	0.00268158	99.34	VK(1)VGVNGFGR	2	1.286	3	0.965	0.947	0.952	1.01	1.046	1.052	1.085	0.0042183
P04632	244	K	Calpain small subunit 1 OS=Homo sapiens OX=9606 GN=CAPNS1 PE=1 SV=1	CAPNS1	1	0.0171114	66.073	AFK(1)SLDK	3	-0.10456	1	1.012	0.947	0.98	0.974	1.054	1.031	1.041	0.2594
P04632	135	K	Calpain small subunit 1 OS=Homo sapiens OX=9606 GN=CAPNS1 PE=1 SV=1	CAPNS1	1	5.06735e-06	99.747	HPDLK(1)TDGFGIDTCR	3	0.029844	1	0.937	0.912	0.952	0.958	1.058	1.129	1.123	0.082622
P04843	516	K	Dolichyl-diphosphooligosaccharide--protein glycosyltransferase subunit 1 OS=Homo sapiens OX=9606 GN=RPN1 PE=1 SV=1	RPN1	1	3.89143e-05	117.52	DISTLNSGK(1)K	3	-1.2431	1
P04843	538	K	Dolichyl-diphosphooligosaccharide--protein glycosyltransferase subunit 1 OS=Homo sapiens OX=9606 GN=RPN1 PE=1 SV=1	RPN1	1	0.000596927	91.62	LK(1)TEGSDLCDR	3	-0.056382	2	1.554	1.514	1.55	0.636	0.655	0.637	0.417	1.3213e-07
P04843	187	K	Dolichyl-diphosphooligosaccharide--protein glycosyltransferase subunit 1 OS=Homo sapiens OX=9606 GN=RPN1 PE=1 SV=1	RPN1	1	1.75673e-17	156.17	NVESYTK(1)LGNPTR	2	-0.077266	1	0.57	0.614	0.604	1.244	1.32	1.267	2.143	1.58621e-05
P04844	401	K	Dolichyl-diphosphooligosaccharide--protein glycosyltransferase subunit 2 OS=Homo sapiens OX=9606 GN=RPN2 PE=1 SV=3	RPN2	1	0.00374178	104.2	VTYPAK(1)AK	2	-0.085774	1	0.983	0.944	0.971	1.077	1.026	0.988	1.067	0.081942
P04844	392	K	Dolichyl-diphosphooligosaccharide--protein glycosyltransferase subunit 2 OS=Homo sapiens OX=9606 GN=RPN2 PE=1 SV=3	RPN2	0.989188	2.78419e-05	62.404	ISTEVGITNVDLSTVDK(0.011)DQSIAPK(0.989)TTR	4	-0.85103	1	0.829	0.938	0.746	1.031	1.145	1.163	1.329	0.0196563
P04844	70	K	Dolichyl-diphosphooligosaccharide--protein glycosyltransferase subunit 2 OS=Homo sapiens OX=9606 GN=RPN2 PE=1 SV=3	RPN2	1	0.0196735	88.294	K(1)ACTYIR	2	-1.3765	1	1.169	1.236	1.211	0.901	0.839	0.862	0.72	0.00023879
P04844	442	K	Dolichyl-diphosphooligosaccharide--protein glycosyltransferase subunit 2 OS=Homo sapiens OX=9606 GN=RPN2 PE=1 SV=3	RPN2	1	9.65183e-11	115.57	LHNQK(1)TGQEVVFVAEPDNK	3	-0.45133	1	0.74	0.848	0.707	1.198	1.112	1.182	1.522	0.0020441
P04844	311	K	Dolichyl-diphosphooligosaccharide--protein glycosyltransferase subunit 2 OS=Homo sapiens OX=9606 GN=RPN2 PE=1 SV=3	RPN2	1	3.52812e-05	124.06	LEHAK(1)SVASR	2	-0.83563	2	0.647	0.769	0.706	1.219	1.246	1.144	1.701	0.00068179
P04844	460	K	Dolichyl-diphosphooligosaccharide--protein glycosyltransferase subunit 2 OS=Homo sapiens OX=9606 GN=RPN2 PE=1 SV=3	RPN2	1	0.0018109	79.885	NVYK(1)FELDTSER	2	-3.4294	1	1.025	1.018	1.057	0.995	0.944	1.009	0.951	0.096237
P04920	893	K	Anion exchange protein 2 OS=Homo sapiens OX=9606 GN=SLC4A2 PE=1 SV=4	SLC4A2	1	2.23352e-06	112.42	SLAGQSGQGK(1)PR	2	-2.3535	1	0.287	0.375	0.323	1.476	1.415	1.482	4.44	4.2628e-05
P05023	444	K	Sodium/potassium-transporting ATPase subunit alpha-1 OS=Homo sapiens OX=9606 GN=ATP1A1 PE=1 SV=1	ATP1A1	1	8.92108e-28	162.72	AVFQANQENLPILK(1)R	3	-0.023738	1	0.891	0.993	1.011	1.026	1.053	1.006	1.066	0.193777
P05026	21	K	Sodium/potassium-transporting ATPase subunit beta-1 OS=Homo sapiens OX=9606 GN=ATP1B1 PE=1 SV=1	ATP1B1	1	0.00850258	90.15	FIWNSEK(1)K	2	-0.59907	1	0.835	0.847	0.887	1.096	1.119	1.092	1.287	0.00021744
P05026	216	K	Sodium/potassium-transporting ATPase subunit beta-1 OS=Homo sapiens OX=9606 GN=ATP1B1 PE=1 SV=1	ATP1B1	1	0.00119252	60.937	YNPNVLPVQCTGK(1)R	3	0.11788	1	0.848	0.965	0.971	0.989	1.101	1.066	1.134	0.08092
P05026	14	K	Sodium/potassium-transporting ATPase subunit beta-1 OS=Homo sapiens OX=9606 GN=ATP1B1 PE=1 SV=1	ATP1B1	1	0.0227152	76.228	K(1)FIWNSEK	2	0.26732	1	1.013	0.956	0.961	1.004	1.075	0.987	1.046	0.23192
P05091	52	K	Aldehyde dehydrogenase, mitochondrial OS=Homo sapiens OX=9606 GN=ALDH2 PE=1 SV=2	ALDH2	1	1.86737e-16	95.646	K(1)TFPTVNPSTGEVICQVAEGDKEDVDK	4	-0.54916	1	1.456	1.43	1.497	0.65	0.681	0.75	0.475	7.6005e-05
P05091	155	K	Aldehyde dehydrogenase, mitochondrial OS=Homo sapiens OX=9606 GN=ALDH2 PE=1 SV=2	ALDH2	1	0.000388522	81.92	YYAGWADK(1)YHGK	3	0.090643	1	1.113	1.094	1.132	0.949	0.949	0.893	0.836	0.00134272
P05091	428	K	Aldehyde dehydrogenase, mitochondrial OS=Homo sapiens OX=9606 GN=ALDH2 PE=1 SV=2	ALDH2	1	0.000833497	90.697	FK(1)TIEEVVGR	2	0.09429	1	1.096	1.063	1.142	0.966	0.959	0.892	0.853	0.0084376
P05141	163	K	ADP/ATP translocase 2 OS=Homo sapiens OX=9606 GN=SLC25A5 PE=1 SV=7	SLC25A5	1	6.52176e-06	122.7	GLGDCLVK(1)IYK	2	-0.88911	3	1.134	1.067	1.068	0.957	0.944	0.938	0.868	0.0025816
P05141	166	K	ADP/ATP translocase 2 OS=Homo sapiens OX=9606 GN=SLC25A5 PE=1 SV=7	SLC25A5	1	0.0241005	74.841	IYK(1)SDGIK	2	3.5619	2	0.948	0.848	0.822	1.137	1.103	1.043	1.254	0.0104967
P05141	23	K	ADP/ATP translocase 2 OS=Homo sapiens OX=9606 GN=SLC25A5 PE=1 SV=7	SLC25A5	1	2.03711e-16	128.01	DFLAGGVAAAISK(1)TAVAPIER	4	0.38643	2	0.948	0.945	1.065	0.915	1.144	0.981	1.028	0.7657
P05141	105	K	ADP/ATP translocase 2 OS=Homo sapiens OX=9606 GN=SLC25A5 PE=1 SV=7	SLC25A5	1	0.000266463	97.734	QIFLGGVDK(1)R	3	0.1039	2	0.769	0.851	0.784	1.178	1.043	1.197	1.422	0.0027795
P05165	385	K	Propionyl-CoA carboxylase alpha chain, mitochondrial OS=Homo sapiens OX=9606 GN=PCCA PE=1 SV=4	PCCA	1	0.0195115	63.565	HK(1)QADIR	3	-0.47307	1	1.053	1	0.918	1.065	1.046	0.935	1.025	0.68542
P05166	60	K	Propionyl-CoA carboxylase beta chain, mitochondrial OS=Homo sapiens OX=9606 GN=PCCB PE=1 SV=3	PCCB	1	0.0129205	64.265	IDAQHK(1)R	3	-1.439	1
P05198	141	K	Eukaryotic translation initiation factor 2 subunit 1 OS=Homo sapiens OX=9606 GN=EIF2S1 PE=1 SV=3	EIF2S1	1	0.000315652	103.44	TAWVFDDK(1)YK	2	-0.7097	1	1.058	1.001	0.992	0.97	1.002	1.012	0.978	0.40944
P05388	50	K	60S acidic ribosomal protein P0 OS=Homo sapiens OX=9606 GN=RPLP0 PE=1 SV=1	RPLP0	1	0.00102884	99.815	GK(1)AVVLMGK	3	0.050929	2	0.895	0.908	0.912	1.055	1.074	1.08	1.182	5.5462e-05
P05388	10	K	60S acidic ribosomal protein P0 OS=Homo sapiens OX=9606 GN=RPLP0 PE=1 SV=1	RPLP0	1	2.31395e-05	127.17	ATWK(1)SNYFLK	2	-1.0825	1	0.996	0.995	0.986	1.014	0.994	1.025	1.019	0.123817
P05455	276	K	Lupus La protein OS=Homo sapiens OX=9606 GN=SSB PE=1 SV=2	SSB	1	0.00240216	87.184	EGIILFK(1)EK	3	0.050357	2	0.866	0.858	0.829	1.19	1.027	1.108	1.302	0.0041436
P05455	328	K	Lupus La protein OS=Homo sapiens OX=9606 GN=SSB PE=1 SV=2	SSB	1	1.29885e-05	104.17	IIEDQQESLNK(1)WK	3	-0.018153	1	0.803	0.783	0.837	1.175	1.109	1.123	1.406	0.00020061
P05455	269	K	Lupus La protein OS=Homo sapiens OX=9606 GN=SSB PE=1 SV=2	SSB	1	0.000636789	81.771	GAK(1)EGIILFK	3	0.14451	2	0.959	0.929	1.014	1.053	0.996	1.035	1.063	0.114479
P05455	200	K	Lupus La protein OS=Homo sapiens OX=9606 GN=SSB PE=1 SV=2	SSB	1	0.0234107	78.516	QNK(1)VEAK	2	-1.4648	2	1.024	0.91	0.936	1.026	1.035	1.047	1.083	0.088304
P05455	166	K	Lupus La protein OS=Homo sapiens OX=9606 GN=SSB PE=1 SV=2	SSB	1	0.00133957	84.615	K(1)FVETPGQK	3	-0.47578	2	0.934	0.965	0.931	1.026	1.013	1.091	1.106	0.0172574
P05455	360	K	Lupus La protein OS=Homo sapiens OX=9606 GN=SSB PE=1 SV=2	SSB	1	0.0245269	83.753	VQFQGK(1)K	2	-0.56695	1	1.221	1.105	1.033	0.954	0.944	0.886	0.829	0.025895
P05455	354	K	Lupus La protein OS=Homo sapiens OX=9606 GN=SSB PE=1 SV=2	SSB	1	0.00267857	111.95	GK(1)VQFQGK	3	-0.83956	2	0.907	0.956	0.947	1.091	1.028	1.029	1.12	0.0112184
P05455	174	K	Lupus La protein OS=Homo sapiens OX=9606 GN=SSB PE=1 SV=2	SSB	1	0.000645013	91.752	FVETPGQK(1)YK	3	-0.065459	2	0.891	0.882	0.881	1.079	1.083	1.088	1.225	6.1737e-07
P05455	352	K	Lupus La protein OS=Homo sapiens OX=9606 GN=SSB PE=1 SV=2	SSB	1	0.00022499	94.767	AAQPGSGK(1)GK	2	0.18108	1	0.94	0.978	0.915	1.017	1.114	0.999	1.105	0.063722
P05455	229	K	Lupus La protein OS=Homo sapiens OX=9606 GN=SSB PE=1 SV=2	SSB	1	0.00540464	56.936	SLEEK(1)IGCLLK	3	0.59072	1
P05455	76	K	Lupus La protein OS=Homo sapiens OX=9606 GN=SSB PE=1 SV=2	SSB	1	1.6824e-06	114.64	SK(1)AELMEISEDK	2	-0.42223	3	0.873	0.954	0.919	1.106	1.034	1.05	1.162	0.010218
P05455	105	K	Lupus La protein OS=Homo sapiens OX=9606 GN=SSB PE=1 SV=2	SSB	0.999999	5.09747e-05	79.489	SPSKPLPEVTDEYK(1)NDVK	4	-0.213	1	0.826	0.899	0.868	1.089	1.1	1.101	1.269	0.0106399
P05455	285	K	Lupus La protein OS=Homo sapiens OX=9606 GN=SSB PE=1 SV=2	SSB	1	0.0375299	76.478	EALGK(1)AK	2	-0.92542	1	0.81	0.861	0.831	1.044	1.239	1.064	1.338	0.0071988
P05556	71	K	Integrin beta-1 OS=Homo sapiens OX=9606 GN=ITGB1 PE=1 SV=2	ITGB1	1	0.00147959	100.88	CDDLEALK(1)K	2	-1.2444	1	1.051	0.985	1.004	0.911	1.118	0.959	0.983	0.76394
P05783	426	K	Keratin, type I cytoskeletal 18 OS=Homo sapiens OX=9606 GN=KRT18 PE=1 SV=2	KRT18	1	1.49064e-32	188.96	VVSETNDTK(1)VLR	3	-0.27628	2	0.829	0.961	0.947	1.146	1.029	1.021	1.168	0.060197
P05783	187	K	Keratin, type I cytoskeletal 18 OS=Homo sapiens OX=9606 GN=KRT18 PE=1 SV=2	KRT18	1	0.020745	64.121	K(1)VIDDTNITR	2	-0.83929	1	0.835	0.993	0.895	1.108	0.994	1.1	1.176	0.056219
P05783	417	K	Keratin, type I cytoskeletal 18 OS=Homo sapiens OX=9606 GN=KRT18 PE=1 SV=2	KRT18	1	0.000277255	91.355	IVDGK(1)VVSETNDTK	3	-0.18066	2	0.9	0.784	0.784	1.109	1.104	1.165	1.369	0.0030156
P05783	247	K	Keratin, type I cytoskeletal 18 OS=Homo sapiens OX=9606 GN=KRT18 PE=1 SV=2	KRT18	1	2.42721e-06	111.64	SQDLAK(1)IMADIR	2	0.13969	1	0.854	0.823	0.828	1.052	1.158	1.138	1.337	0.00079827
P06396	346	K	Gelsolin OS=Homo sapiens OX=9606 GN=GSN PE=1 SV=1	GSN	1	0.0127449	94.407	IFVWK(1)GK	2	-0.60586	1	1.156	1.146	1.083	0.931	0.921	0.909	0.816	0.0007037
P06400	427	K	Retinoblastoma-associated protein OS=Homo sapiens OX=9606 GN=RB1 PE=1 SV=2	RB1	1	0.00135233	105.46	DIGYIFK(1)EK	2	1.6972	2	0.932	0.985	0.907	1.083	1	1.054	1.111	0.035575
P06400	65	K	Retinoblastoma-associated protein OS=Homo sapiens OX=9606 GN=RB1 PE=1 SV=2	RB1	1	0.00150538	94.114	LK(1)IPDHVR	3	-0.34904	1	1.381	1.521	1.526	0.796	0.554	0.706	0.464	0.002224
P06493	201	K	Cyclin-dependent kinase 1 OS=Homo sapiens OX=9606 GN=CDK1 PE=1 SV=3	CDK1	1	4.3656e-08	107.82	K(1)PLFHGDSEIDQLFR	3	-0.042074	1	0.984	0.982	1.091	1.003	0.928	1.046	0.974	0.61964
P06576	426	K	ATP synthase subunit beta, mitochondrial OS=Homo sapiens OX=9606 GN=ATP5F1B PE=1 SV=3	ATP5F1B	1	5.26231e-10	150.46	GVQK(1)ILQDYK	3	0.58701	2	0.881	0.938	0.842	1.123	1.054	1.071	1.221	0.0054796
P06576	198	K	ATP synthase subunit beta, mitochondrial OS=Homo sapiens OX=9606 GN=ATP5F1B PE=1 SV=3	ATP5F1B	1	0.00122019	62.088	VVDLLAPYAK(1)GGK	3	-0.74614	1
P06576	264	K	ATP synthase subunit beta, mitochondrial OS=Homo sapiens OX=9606 GN=ATP5F1B PE=1 SV=3	ATP5F1B	1	1.31839e-10	108.45	DATSK(1)VALVYGQMNEPPGAR	3	-0.13158	1	1.049	0.989	0.956	1.007	1.029	0.988	1.01	0.73866
P06576	485	K	ATP synthase subunit beta, mitochondrial OS=Homo sapiens OX=9606 GN=ATP5F1B PE=1 SV=3	ATP5F1B	1	7.26296e-17	133.81	LVPLK(1)ETIK	2	-0.08844	1
P06703	40	K	Protein S100-A6 OS=Homo sapiens OX=9606 GN=S100A6 PE=1 SV=1	S100A6	1	9.50292e-05	92.856	ELIQK(1)ELTIGSK	3	-0.10274	1
P06703	26	K	Protein S100-A6 OS=Homo sapiens OX=9606 GN=S100A6 PE=1 SV=1	S100A6	1	0.000547997	123.67	EGDK(1)HTLSK	3	0.31653	4	0.577	0.586	0.58	1.326	1.28	1.261	2.219	4.3761e-07
P06703	47	K	Protein S100-A6 OS=Homo sapiens OX=9606 GN=S100A6 PE=1 SV=1	S100A6	1	3.67984e-17	143.67	ELTIGSK(1)LQDAEIAR	2	2.3491	3	0.797	0.814	0.819	1.137	1.163	1.102	1.4	4.2417e-05
P06730	36	K	Eukaryotic translation initiation factor 4E OS=Homo sapiens OX=9606 GN=EIF4E PE=1 SV=2	EIF4E	1	3.06426e-12	117.37	TESNQEVANPEHYIK(1)HPLQNR	4	0.037455	1	1.053	1.168	1.193	0.918	0.862	0.953	0.801	0.0101648
P06730	162	K	Eukaryotic translation initiation factor 4E OS=Homo sapiens OX=9606 GN=EIF4E PE=1 SV=2	EIF4E	1	0.00117745	56.514	GDK(1)IAIWTTECENR	3	-0.2928	1	0.983	1.082	0.999	0.982	1.024	0.968	0.971	0.44024
P06733	330	K	Alpha-enolase OS=Homo sapiens OX=9606 GN=ENO1 PE=1 SV=2	ENO1	1	0.0101608	86.898	IAK(1)AVNEK	2	1.7684	1	1.234	1.067	1.111	0.89	0.914	0.94	0.804	0.0093834
P06733	71	K	Alpha-enolase OS=Homo sapiens OX=9606 GN=ENO1 PE=1 SV=2	ENO1	1	1.33044e-20	109.04	AVEHINK(1)TIAPALVSK	3	2.9105	2
P06733	80	K	Alpha-enolase OS=Homo sapiens OX=9606 GN=ENO1 PE=1 SV=2	ENO1	1	0.000132711	116.74	TIAPALVSK(1)K	2	-0.15513	3	0.963	0.936	0.953	1.097	0.972	1.052	1.094	0.071076
P06733	262	K	Alpha-enolase OS=Homo sapiens OX=9606 GN=ENO1 PE=1 SV=2	ENO1	1	5.21822e-07	116.58	YDLDFK(1)SPDDPSR	3	0.34998	2	0.82	0.866	0.818	1.168	1.073	1.114	1.34	0.00068413
P06733	193	K	Alpha-enolase OS=Homo sapiens OX=9606 GN=ENO1 PE=1 SV=2	ENO1	1	1.81671e-18	157.86	IGAEVYHNLK(1)NVIK	2	-2.1119	7	1.084	1.022	1.032	0.973	0.984	0.971	0.933	0.021038
P06733	420	K	Alpha-enolase OS=Homo sapiens OX=9606 GN=ENO1 PE=1 SV=2	ENO1	1	0.000212474	108.56	IEEELGSK(1)AK	2	1.0548	3	1.036	1.005	1	1.014	1.014	0.965	0.984	0.46426
P06733	126	K	Alpha-enolase OS=Homo sapiens OX=9606 GN=ENO1 PE=1 SV=2	ENO1	1	0.000713023	89.43	AGAVEK(1)GVPLYR	2	1.7312	1	1.033	1.091	1.08	0.903	0.947	1.023	0.897	0.0514
P06733	233	K	Alpha-enolase OS=Homo sapiens OX=9606 GN=ENO1 PE=1 SV=2	ENO1	1	3.15448e-05	113.76	TAIGK(1)AGYTDK	3	-0.55059	4	0.966	0.948	0.888	1.091	1.037	1.027	1.126	0.0198227
P06733	228	K	Alpha-enolase OS=Homo sapiens OX=9606 GN=ENO1 PE=1 SV=2	ENO1	1	3.33397e-06	107.99	EGLELLK(1)TAIGK	2	-0.32074	1	1.034	0.942	1.017	1.094	0.946	0.989	1.012	0.8432
P06733	64	K	Alpha-enolase OS=Homo sapiens OX=9606 GN=ENO1 PE=1 SV=2	ENO1	1	0.000956609	77.597	GVSK(1)AVEHINK	3	0.042318	1	0.801	0.816	0.728	1.155	1.204	1.103	1.476	0.00085661
P06733	406	K	Alpha-enolase OS=Homo sapiens OX=9606 GN=ENO1 PE=1 SV=2	ENO1	1	0.00142337	105.52	LAK(1)YNQLLR	3	1.0329	3	1.062	1.089	1.042	0.84	0.938	1.101	0.902	0.24062
P06733	103	K	Alpha-enolase OS=Homo sapiens OX=9606 GN=ENO1 PE=1 SV=2	ENO1	1	3.63017e-10	124.62	LMIEMDGTENK(1)SK	2	1.7786	6	1.139	1.122	1.172	0.901	0.89	0.934	0.794	0.00028005
P06733	60	K	Alpha-enolase OS=Homo sapiens OX=9606 GN=ENO1 PE=1 SV=2	ENO1	1	0.0144865	60.91	YMGK(1)GVSK	3	-0.043661	1	0.832	1.068	0.905	1.077	1.017	1.05	1.121	0.187964
P06733	335	K	Alpha-enolase OS=Homo sapiens OX=9606 GN=ENO1 PE=1 SV=2	ENO1	1	9.75047e-11	130.72	AVNEK(1)SCNCLLLK	2	0.29651	6	1.575	1.526	1.454	0.656	0.66	0.657	0.433	0.00077832
P06733	256	K	Alpha-enolase OS=Homo sapiens OX=9606 GN=ENO1 PE=1 SV=2	ENO1	1	0.0015966	93.345	SGK(1)YDLDFK	3	0.66237	2	0.937	1.001	0.947	1.077	1.015	1.006	1.074	0.074117
P06733	5	K	Alpha-enolase OS=Homo sapiens OX=9606 GN=ENO1 PE=1 SV=2	ENO1	1	0.000836055	103.83	SILK(1)IHAR	2	-0.78198	2	1.029	0.893	0.984	1.07	0.973	1.042	1.062	0.29572
P06744	252	K	Glucose-6-phosphate isomerase OS=Homo sapiens OX=9606 GN=GPI PE=1 SV=4	GPI	1	3.9125e-05	98.105	HFVALSTNTTK(1)VK	4	0.15911	2	1.087	1.109	1.066	0.935	1.003	0.905	0.872	0.0129844
P06744	34	K	Glucose-6-phosphate isomerase OS=Homo sapiens OX=9606 GN=GPI PE=1 SV=4	GPI	1	0.0342552	68.657	LFDANK(1)DR	2	-0.74813	1	0.921	0.937	1.062	1.037	1.026	1.007	1.051	0.31822
P06744	142	K	Glucose-6-phosphate isomerase OS=Homo sapiens OX=9606 GN=GPI PE=1 SV=4	GPI	1	0.00175241	85.554	SGDWK(1)GYTGK	2	0.89738	1	1.099	1.043	1.162	0.978	0.92	0.918	0.852	0.0131424
P06744	241	K	Glucose-6-phosphate isomerase OS=Homo sapiens OX=9606 GN=GPI PE=1 SV=4	GPI	1	1.43632e-09	111.65	DPSAVAK(1)HFVALSTNTTK	4	0.81877	3	1.046	1.01	0.981	0.963	0.987	1.042	0.985	0.63808
P06744	73	K	Glucose-6-phosphate isomerase OS=Homo sapiens OX=9606 GN=GPI PE=1 SV=4	GPI	1	0.0244871	65.157	MLVDLAK(1)SR	2	-0.99773	1	0.847	0.876	0.781	1.121	1.226	1.008	1.34	0.0117028
P06748	27	K	Nucleophosmin OS=Homo sapiens OX=9606 GN=NPM1 PE=1 SV=2	NPM1	1	0.0233603	52.579	ADK(1)DYHFK	3	-0.18114	1	1.125	1.065	1.166	0.876	0.964	0.936	0.827	0.0079849
P06748	32	K	Nucleophosmin OS=Homo sapiens OX=9606 GN=NPM1 PE=1 SV=2	NPM1	1	2.37212e-31	158	DYHFK(1)VDNDENEHQLSLR	3	-2.0258	6	0.903	0.905	0.908	1.11	1.047	1.056	1.183	0.011682
P06748	248	K	Nucleophosmin OS=Homo sapiens OX=9606 GN=NPM1 PE=1 SV=2	NPM1	1	0.00017543	96.745	GPSSVEDIK(1)AK	3	0.74514	2	0.906	0.987	0.886	1.068	1.043	1.056	1.14	0.017242
P06748	273	K	Nucleophosmin OS=Homo sapiens OX=9606 GN=NPM1 PE=1 SV=2	NPM1	1	1.84475e-07	142.36	FINYVK(1)NCFR	3	-0.61438	4	1.298	1.241	1.3	0.808	0.855	0.79	0.639	8.4647e-05
P06748	267	K	Nucleophosmin OS=Homo sapiens OX=9606 GN=NPM1 PE=1 SV=2	NPM1	1	3.06172e-06	132.32	VEAK(1)FINYVK	2	0.2751	5	1.076	1.165	1.063	0.932	0.913	0.967	0.851	0.0084786
P06748	263	K	Nucleophosmin OS=Homo sapiens OX=9606 GN=NPM1 PE=1 SV=2	NPM1	1	0.000580701	92.112	GGSLPK(1)VEAK	3	0.20146	2	0.942	0.9	0.864	1.111	1.061	1.048	1.19	0.0047218
P06748	202	K	Nucleophosmin OS=Homo sapiens OX=9606 GN=NPM1 PE=1 SV=2	NPM1	1	1.07001e-07	121.6	DTPAK(1)NAQK	2	-1.1015	4	0.865	0.845	0.852	1.16	1.052	1.103	1.294	0.00090034
P06748	141	K	Nucleophosmin OS=Homo sapiens OX=9606 GN=NPM1 PE=1 SV=2	NPM1	1	0.00299848	89.752	LLSISGK(1)R	3	0.27501	2	1.038	1.023	1.018	1.007	1.008	0.953	0.964	0.129539
P06748	229	K	Nucleophosmin OS=Homo sapiens OX=9606 GN=NPM1 PE=1 SV=2	NPM1	1	0.0145472	75.109	GQESFK(1)K	3	-0.2894	1	0.958	1.072	0.929	1.085	0.974	0.989	1.03	0.61018
P06748	223	K	Nucleophosmin OS=Homo sapiens OX=9606 GN=NPM1 PE=1 SV=2	NPM1	1	6.27865e-05	137.46	SK(1)GQESFK	3	0.99136	2	0.902	0.877	0.89	1.099	1.053	1.09	1.215	0.00022369
P06748	150	K	Nucleophosmin OS=Homo sapiens OX=9606 GN=NPM1 PE=1 SV=2	NPM1	1	5.80388e-05	103.97	SAPGGGSK(1)VPQK	2	-0.19096	4	1.062	1.018	0.966	1.019	1	0.971	0.982	0.59014
P06899	121	K	Histone H2B type 1-J OS=Homo sapiens OX=9606 GN=H2BC11 PE=1 SV=3	H2BC11	1	0.00143512	105.13	AVTK(1)YTSAK	2	-1.0156	1	0.933	0.838	0.886	1.081	1.096	1.073	1.223	0.0030608
P07099	286	K	Epoxide hydrolase 1 OS=Homo sapiens OX=9606 GN=EPHX1 PE=1 SV=1	EPHX1	1	0.00502557	58.172	DVELLYPVK(1)EK	3	-0.69392	1
P07108	53	K	Acyl-CoA-binding protein OS=Homo sapiens OX=9606 GN=DBI PE=1 SV=2	DBI	1	0.000508415	92.19	QATVGDINTERPGMLDFTGK(1)AK	4	0.054665	3	1.036	0.985	0.874	1.056	0.978	1.058	1.068	0.29842
P07108	77	K	Acyl-CoA-binding protein OS=Homo sapiens OX=9606 GN=DBI PE=1 SV=2	DBI	1	1.98954e-07	142.08	AYINK(1)VEELK	3	0.64856	2	1.041	1.018	1.003	1.029	0.968	0.983	0.973	0.26818
P07108	19	K	Acyl-CoA-binding protein OS=Homo sapiens OX=9606 GN=DBI PE=1 SV=2	DBI	1	7.43329e-09	113.47	TK(1)PSDEEMLFIYGHYK	4	-1.1648	7	1.104	1.04	1.06	0.952	0.97	0.959	0.899	0.0045397
P07108	55	K	Acyl-CoA-binding protein OS=Homo sapiens OX=9606 GN=DBI PE=1 SV=2	DBI	1	4.17845e-05	122.39	AK(1)WDAWNELK	2	0.55611	8	1.164	1.129	1.134	0.905	0.916	0.91	0.797	2.1827e-05
P07195	308	K	L-lactate dehydrogenase B chain OS=Homo sapiens OX=9606 GN=LDHB PE=1 SV=2	LDHB	1	1.61879e-05	106.62	GLTSVINQK(1)LK	2	-1.166	2	1.091	1.033	1.133	0.966	0.931	0.949	0.874	0.00964
P07195	319	K	L-lactate dehydrogenase B chain OS=Homo sapiens OX=9606 GN=LDHB PE=1 SV=2	LDHB	1	1.89227e-06	130.2	K(1)SADTLWDIQK	3	-0.65521	2	1.06	1.05	1.033	1.046	0.917	0.964	0.931	0.136776
P07195	156	K	L-lactate dehydrogenase B chain OS=Homo sapiens OX=9606 GN=LDHB PE=1 SV=2	LDHB	1	0.00125025	98.997	LSGLPK(1)HR	3	0.4238	1	0.816	0.964	0.982	1.032	0.922	1.212	1.146	0.24782
P07195	318	K	L-lactate dehydrogenase B chain OS=Homo sapiens OX=9606 GN=LDHB PE=1 SV=2	LDHB	1	3.10061e-05	73.273	LKDDEVAQLK(1)K	3	0.097172	1
P07195	329	K	L-lactate dehydrogenase B chain OS=Homo sapiens OX=9606 GN=LDHB PE=1 SV=2	LDHB	1	1.54708e-06	109.83	SADTLWDIQK(1)DLK	2	-1.4573	1	1.093	1.043	1.049	1.017	0.918	0.963	0.91	0.045175
P07196	128	K	Neurofilament light polypeptide OS=Homo sapiens OX=9606 GN=NEFL PE=1 SV=3	NEFL	1	0.0426312	41.448	QK(1)HSEPSR	3	0.068112	1	0.63	0.85	0.819	1.199	1.198	1.089	1.516	0.0130616
P07237	271	K	Protein disulfide-isomerase OS=Homo sapiens OX=9606 GN=P4HB PE=1 SV=3	P4HB	1	4.46583e-05	96.82	SVSDYDGK(1)LSNFK	3	0.326	1	0.854	0.853	0.97	1.112	1.066	1.059	1.209	0.0133983
P07237	350	K	Protein disulfide-isomerase OS=Homo sapiens OX=9606 GN=P4HB PE=1 SV=3	P4HB	1	0.0355138	77.318	FLEGK(1)IK	2	0.61525	1	1.068	1.017	0.984	1.004	1.006	0.965	0.969	0.32468
P07237	130	K	Protein disulfide-isomerase OS=Homo sapiens OX=9606 GN=P4HB PE=1 SV=3	P4HB	1	0.00115233	88.338	EADDIVNWLK(1)K	2	-0.84105	2	0.95	0.927	0.939	1.028	1.03	1.082	1.115	0.0039399
P07237	276	K	Protein disulfide-isomerase OS=Homo sapiens OX=9606 GN=P4HB PE=1 SV=3	P4HB	1	2.25548e-07	124.62	LSNFK(1)TAAESFK	2	0.052727	2	1	0.933	0.904	1.055	1.026	1.049	1.103	0.032981
P07237	328	K	Protein disulfide-isomerase OS=Homo sapiens OX=9606 GN=P4HB PE=1 SV=3	P4HB	1	1.88993e-07	125.97	YK(1)PESEELTAER	2	-1.602	1	0.894	0.996	0.995	0.933	1.081	1.07	1.069	0.33098
P07237	385	K	Protein disulfide-isomerase OS=Homo sapiens OX=9606 GN=P4HB PE=1 SV=3	P4HB	1	4.9423e-06	125.53	NFEDVAFDEK(1)K	2	0.36476	2	1.049	1.001	0.971	1.007	1.007	0.992	0.995	0.85468
P07237	283	K	Protein disulfide-isomerase OS=Homo sapiens OX=9606 GN=P4HB PE=1 SV=3	P4HB	1	0.00102275	114.89	TAAESFK(1)GK	2	-0.29224	1	0.853	0.811	0.949	1.087	1.045	1.143	1.253	0.0128246
P07237	309	K	Protein disulfide-isomerase OS=Homo sapiens OX=9606 GN=P4HB PE=1 SV=3	P4HB	1	0.00170122	121.64	K(1)EECPAVR	3	0.4143	2	1.6	1.521	1.471	0.613	0.641	0.691	0.424	3.7866e-05
P07237	263	K	Protein disulfide-isomerase OS=Homo sapiens OX=9606 GN=P4HB PE=1 SV=3	P4HB	1	6.44623e-05	87.388	THILLFLPK(1)SVSDYDGK	3	0.12184	2	0.961	1.045	1.051	1.033	0.974	0.971	0.974	0.50542
P07237	308	K	Protein disulfide-isomerase OS=Homo sapiens OX=9606 GN=P4HB PE=1 SV=3	P4HB	1	0.00332344	86.898	ILEFFGLK(1)K	3	-0.031928	2	1.755	1.698	1.841	0.452	0.513	0.506	0.278	1.51387e-05
P07237	81	K	Protein disulfide-isomerase OS=Homo sapiens OX=9606 GN=P4HB PE=1 SV=3	P4HB	1	4.24856e-22	144.68	LAK(1)VDATEESDLAQQYGVR	3	-0.16294	2	0.705	0.859	0.798	1.138	1.186	1.119	1.458	0.0032212
P07237	103	K	Protein disulfide-isomerase OS=Homo sapiens OX=9606 GN=P4HB PE=1 SV=3	P4HB	1	0.00113955	112.71	GYPTIK(1)FFR	2	0.17816	1	0.801	0.905	0.89	1.116	1.024	1.145	1.265	0.009864
P07237	375	K	Protein disulfide-isomerase OS=Homo sapiens OX=9606 GN=P4HB PE=1 SV=3	P4HB	1	6.7407e-07	106.14	VLVGK(1)NFEDVAFDEK	3	0.64843	1	0.904	0.95	0.961	1.099	1.004	1.04	1.117	0.027276
P07237	409	K	Protein disulfide-isomerase OS=Homo sapiens OX=9606 GN=P4HB PE=1 SV=3	P4HB	1	2.09658e-05	95.264	QLAPIWDK(1)LGETYK	3	0.14262	1	0.816	0.854	0.773	1.152	1.097	1.144	1.389	0.00054108
P07237	31	K	Protein disulfide-isomerase OS=Homo sapiens OX=9606 GN=P4HB PE=1 SV=3	P4HB	1	3.22848e-07	126.09	K(1)SNFAEALAAHK	3	-0.15845	7	1.122	1.102	1.127	0.925	0.923	0.933	0.83	1.82253e-05
P07305	59	K	Histone H1.0 OS=Homo sapiens OX=9606 GN=H1-0 PE=1 SV=3	H1-0	1	0.000261998	80.387	SHYK(1)VGENADSQIK	3	-0.17078	1	0.879	1.049	1.079	1.019	1.023	0.967	1.001	0.95092
P07311	25	K	Acylphosphatase-1 OS=Homo sapiens OX=9606 GN=ACYP1 PE=1 SV=2	ACYP1	1	0.0226976	57.859	K(1)HTQAEGK	3	-0.73401	1	0.904	1.117	1.012	1.018	0.984	0.99	0.986	0.87974
P07311	73	K	Acylphosphatase-1 OS=Homo sapiens OX=9606 GN=ACYP1 PE=1 SV=2	ACYP1	1	0.00299137	74.841	GSPK(1)SHIDK	3	0.53724	1	0.921	0.944	0.959	1.091	1.001	1.046	1.111	0.0188372
P07339	127	K	Cathepsin D OS=Homo sapiens OX=9606 GN=CTSD PE=1 SV=1	CTSD	1	1.02204e-07	132.97	YNSDK(1)SSTYVK	2	-1.1133	2	1.036	1.052	1.028	0.993	0.972	0.975	0.944	0.0036236
P07355	152	K	Annexin A2 OS=Homo sapiens OX=9606 GN=ANXA2 PE=1 SV=2	ANXA2	1	0.00142168	100.93	EMYK(1)TDLEK	2	0.42619	3	0.86	0.871	0.884	1.113	1.084	1.08	1.253	5.6582e-05
P07355	233	K	Annexin A2 OS=Homo sapiens OX=9606 GN=ANXA2 PE=1 SV=2	ANXA2	1	3.75849e-25	136.63	YK(1)SYSPYDMLESIR	2	-0.11467	3	0.936	0.81	0.984	1.045	1.065	1.088	1.171	0.053341
P07355	204	K	Annexin A2 OS=Homo sapiens OX=9606 GN=ANXA2 PE=1 SV=2	ANXA2	1	0.0112661	75.387	DLYDAGVK(1)R	2	-1.5951	1	0.877	1.009	1.016	1.063	1.034	0.986	1.062	0.3029
P07355	227	K	Annexin A2 OS=Homo sapiens OX=9606 GN=ANXA2 PE=1 SV=2	ANXA2	1	2.16791e-09	107.09	SVPHLQK(1)VFDR	3	1.6873	4	0.986	0.983	1.057	0.977	0.989	1.03	0.99	0.75252
P07355	279	K	Annexin A2 OS=Homo sapiens OX=9606 GN=ANXA2 PE=1 SV=2	ANXA2	1	0.00602602	93.649	LYDSMK(1)GK	2	-0.24364	3	0.931	0.954	0.937	1.051	1.056	1.031	1.112	0.00050427
P07355	47	K	Annexin A2 OS=Homo sapiens OX=9606 GN=ANXA2 PE=1 SV=2	ANXA2	1	7.26568e-18	160.78	DALNIETAIK(1)TK	2	-0.46601	2	0.907	0.909	0.845	1.133	1.031	1.086	1.221	0.0053231
P07355	212	K	Annexin A2 OS=Homo sapiens OX=9606 GN=ANXA2 PE=1 SV=2	ANXA2	1	2.1519e-17	147.75	GTDVPK(1)WISIMTER	2	-0.20989	2	0.9	0.911	0.857	1.105	1.042	1.096	1.216	0.00173562
P07355	324	K	Annexin A2 OS=Homo sapiens OX=9606 GN=ANXA2 PE=1 SV=2	ANXA2	1	0.000134404	71.98	SLYYYIQQDTK(1)GDYQK	3	1.6597	1
P07355	302	K	Annexin A2 OS=Homo sapiens OX=9606 GN=ANXA2 PE=1 SV=2	ANXA2	1	0.00111343	104.22	SEVDMLK(1)IR	3	-0.70286	3	0.98	0.936	0.983	1.007	1.084	0.995	1.065	0.116983
P07355	49	K	Annexin A2 OS=Homo sapiens OX=9606 GN=ANXA2 PE=1 SV=2	ANXA2	1	3.3268e-06	101.9	TK(1)GVDEVTIVNILTNR	3	-0.43437	1	0.959	0.976	1.06	1.107	0.935	0.983	1.01	0.89342
P07355	148	K	Annexin A2 OS=Homo sapiens OX=9606 GN=ANXA2 PE=1 SV=2	ANXA2	1	0.0197409	87.476	VYK(1)EMYK	2	-1.0662	2	0.961	0.892	0.967	1.077	1.014	1.05	1.114	0.025842
P07384	365	K	Calpain-1 catalytic subunit OS=Homo sapiens OX=9606 GN=CAPN1 PE=1 SV=1	CAPN1	1	0.00632361	70.438	K(1)WNTTLYEGTWR	2	3.9524	1	1.252	1.335	1.427	0.794	0.728	0.808	0.58	0.00039788
P07384	359	K	Calpain-1 catalytic subunit OS=Homo sapiens OX=9606 GN=CAPN1 PE=1 SV=1	CAPN1	1	3.90672e-05	94.128	LEICNLTPDALK(1)SR	2	0.095727	2	1.001	0.951	1.009	0.954	1.039	1.047	1.027	0.50332
P07384	36	K	Calpain-1 catalytic subunit OS=Homo sapiens OX=9606 GN=CAPN1 PE=1 SV=1	CAPN1	1	0.000116902	68.41	HENAIK(1)YLGQDYEQLR	3	-0.24363	1	0.933	0.931	0.965	0.975	1.159	0.996	1.106	0.152277
P07602	55	K	Prosaposin OS=Homo sapiens OX=9606 GN=PSAP PE=1 SV=2	PSAP	1	4.33022e-05	66.989	HCLQTVWNK(1)PTVK	3	3.5377	1
P07686	465	K	Beta-hexosaminidase subunit beta OS=Homo sapiens OX=9606 GN=HEXB PE=1 SV=3	HEXB	1	6.09186e-10	119.96	YYK(1)VEPLDFGGTQK	3	-0.1873	1	0.819	0.85	0.936	1.099	1.048	1.133	1.259	0.007216
P07737	91	K	Profilin-1 OS=Homo sapiens OX=9606 GN=PFN1 PE=1 SV=2	PFN1	1	8.93491e-28	160.02	TK(1)STGGAPTFNVTVTK	2	0.1587	2	1.256	1.243	1.195	0.852	0.847	0.853	0.691	0.00171661
P07737	108	K	Profilin-1 OS=Homo sapiens OX=9606 GN=PFN1 PE=1 SV=2	PFN1	1	1.88095e-06	130.1	TDK(1)TLVLLMGK	2	0.69139	5	1.101	1.139	1.151	0.925	0.911	0.917	0.812	0.000121346
P07737	105	K	Profilin-1 OS=Homo sapiens OX=9606 GN=PFN1 PE=1 SV=2	PFN1	1	9.48434e-34	165.66	STGGAPTFNVTVTK(1)TDK	3	0.2216	5	1.1	1.087	1.079	0.939	0.948	0.952	0.869	3.7702e-05
P07737	54	K	Profilin-1 OS=Homo sapiens OX=9606 GN=PFN1 PE=1 SV=2	PFN1	1	7.02194e-34	159.72	TFVNITPAEVGVLVGK(1)DR	2	-0.80735	2	1.104	1.085	0.948	0.949	0.995	0.982	0.933	0.24944
P07737	126	K	Profilin-1 OS=Homo sapiens OX=9606 GN=PFN1 PE=1 SV=2	PFN1	1	0.000553746	60.255	EGVHGGLINK(1)K	3	-0.44079	2	1.311	1.369	1.285	0.819	0.779	0.771	0.597	4.0356e-05
P07814	907	K	Bifunctional glutamate/proline--tRNA ligase OS=Homo sapiens OX=9606 GN=EPRS PE=1 SV=5	EPRS	1	0.00506405	51.03	VLFDK(1)VASQGEVVR	3	-0.93175	1	0.937	0.858	0.879	1.056	1.139	1.045	1.212	0.0070755
P07814	139	K	Bifunctional glutamate/proline--tRNA ligase OS=Homo sapiens OX=9606 GN=EPRS PE=1 SV=5	EPRS	1	0.00372225	55.261	GNAAWQEQLK(1)QK	3	0.22075	1	1.15	1.16	1.101	0.903	0.9	0.938	0.804	0.00047614
P07814	1361	K	Bifunctional glutamate/proline--tRNA ligase OS=Homo sapiens OX=9606 GN=EPRS PE=1 SV=5	EPRS	1	4.23039e-05	98.105	FNHWELK(1)GVPIR	3	1.3915	1	1.009	1.009	1.018	1.016	1.025	0.955	0.987	0.6027
P07814	148	K	Bifunctional glutamate/proline--tRNA ligase OS=Homo sapiens OX=9606 GN=EPRS PE=1 SV=5	EPRS	1	0.00153274	98.523	KAPVHVK(1)R	4	0.017247	2	1.297	1.028	0.982	0.956	0.853	1.011	0.853	0.196497
P07814	417	K	Bifunctional glutamate/proline--tRNA ligase OS=Homo sapiens OX=9606 GN=EPRS PE=1 SV=5	EPRS	1	0.00915157	77.288	K(1)PYIWEYSR	2	-1.1011	1	0.988	1.026	0.961	1.039	1.035	0.963	1.021	0.54856
P07814	1109	K	Bifunctional glutamate/proline--tRNA ligase OS=Homo sapiens OX=9606 GN=EPRS PE=1 SV=5	EPRS	1	0.0283229	50.158	SGK(1)TELAEPIAIR	2	1.7356	1	1.028	0.971	1.042	0.954	0.989	1.045	0.983	0.6298
P07858	220	K	Cathepsin B OS=Homo sapiens OX=9606 GN=CTSB PE=1 SV=3	CTSB	1	0.000241607	81.904	ICEPGYSPTYK(1)QDK	3	-1.459	1	0.982	0.993	1.169	1.012	0.864	1.041	0.928	0.40604
P07900	84	K	Heat shock protein HSP 90-alpha OS=Homo sapiens OX=9606 GN=HSP90AA1 PE=1 SV=5	HSP90AA1	1	0.000498221	70.373	ELHINLIPNK(1)QDR	3	0.31773	1	0.727	0.743	0.897	1.071	1.345	1.025	1.454	0.025881
P07900	436	K	Heat shock protein HSP 90-alpha OS=Homo sapiens OX=9606 GN=HSP90AA1 PE=1 SV=5	HSP90AA1	1	0.00527565	97.472	K(1)FYEQFSK	2	0.12095	1	1.03	1.059	0.997	0.96	1.033	0.967	0.959	0.2232
P07900	632	K	Heat shock protein HSP 90-alpha OS=Homo sapiens OX=9606 GN=HSP90AA1 PE=1 SV=5	HSP90AA1	1	9.35115e-12	122.01	K(1)HLEINPDHSIIETLR	2	0.53192	4	0.895	0.871	0.956	1.028	1.064	1.109	1.176	0.0100173
P07900	489	K	Heat shock protein HSP 90-alpha OS=Homo sapiens OX=9606 GN=HSP90AA1 PE=1 SV=5	HSP90AA1	1	1.18795e-05	100.43	ENQK(1)HIYYITGETK	3	-0.21799	5	1.021	0.988	1.02	1.018	0.991	0.991	0.99	0.53194
P07900	58	K	Heat shock protein HSP 90-alpha OS=Homo sapiens OX=9606 GN=HSP90AA1 PE=1 SV=5	HSP90AA1	1	5.11249e-18	156.17	ELISNSSDALDK(1)IR	3	0.89337	2	1.068	0.925	1.01	0.945	1.038	1.033	1.004	0.92574
P07900	567	K	Heat shock protein HSP 90-alpha OS=Homo sapiens OX=9606 GN=HSP90AA1 PE=1 SV=5	HSP90AA1	1	0.000535464	107.01	TK(1)FENLCK	3	0.23519	3	1.473	1.347	1.365	0.728	0.755	0.74	0.531	2.4582e-05
P07900	209	K	Heat shock protein HSP 90-alpha OS=Homo sapiens OX=9606 GN=HSP90AA1 PE=1 SV=5	HSP90AA1	1	0.000232085	79.393	K(1)HSQFIGYPITLFVEK	3	-0.51659	1	0.877	0.926	0.96	1.119	1.075	0.987	1.151	0.036621
P07900	499	K	Heat shock protein HSP 90-alpha OS=Homo sapiens OX=9606 GN=HSP90AA1 PE=1 SV=5	HSP90AA1	1	1.11016e-22	141.6	HIYYITGETK(1)DQVANSAFVER	3	-0.091364	1	1.037	1.189	1.168	0.902	0.983	0.863	0.81	0.021444
P07900	539	K	Heat shock protein HSP 90-alpha OS=Homo sapiens OX=9606 GN=HSP90AA1 PE=1 SV=5	HSP90AA1	1	9.21708e-14	154.65	EFEGK(1)TLVSVTK	2	0.34409	2	1.114	1.001	1.045	0.977	0.941	0.995	0.922	0.083323
P07900	576	K	Heat shock protein HSP 90-alpha OS=Homo sapiens OX=9606 GN=HSP90AA1 PE=1 SV=5	HSP90AA1	1	0.00316475	93.096	IMK(1)DILEK	3	0.51489	4	1.881	1.876	1.791	0.418	0.456	0.43	0.235	5.6281e-07
P07900	478	K	Heat shock protein HSP 90-alpha OS=Homo sapiens OX=9606 GN=HSP90AA1 PE=1 SV=5	HSP90AA1	1	4.65424e-15	124.84	YYTSASGDEMVSLK(1)DYCTR	3	-0.55861	1	1.093	1.072	1.088	0.937	0.883	1.025	0.875	0.089881
P07910	170	K	Heterogeneous nuclear ribonucleoproteins C1/C2 OS=Homo sapiens OX=9606 GN=HNRNPC PE=1 SV=4	HNRNPC	1	0.00552841	76.679	GK(1)SGFNSK	3	-1.8152	1	0.847	0.772	0.732	1.138	1.105	1.214	1.47	0.0016153
P07910	197	K	Heterogeneous nuclear ribonucleoproteins C1/C2 OS=Homo sapiens OX=9606 GN=HNRNPC PE=1 SV=4	HNRNPC	1	0.0021247	91.549	GDDLQAIK(1)K	3	0.56959	2	0.814	0.816	0.783	1.185	1.099	1.132	1.416	0.000176402
P07910	189	K	Heterogeneous nuclear ribonucleoproteins C1/C2 OS=Homo sapiens OX=9606 GN=HNRNPC PE=1 SV=4	HNRNPC	1	0.00296572	80.69	LK(1)GDDLQAIK	2	-2.7751	1	0.873	0.873	0.929	1.05	1.137	1.048	1.209	0.0050151
P07910	39	K	Heterogeneous nuclear ribonucleoproteins C1/C2 OS=Homo sapiens OX=9606 GN=HNRNPC PE=1 SV=4	HNRNPC	1	0.000217791	86.944	SDVEAIFSK(1)YGK	3	0.046024	2	0.895	0.836	0.913	1.118	1.031	1.11	1.233	0.0049035
P07910	204	K	Heterogeneous nuclear ribonucleoproteins C1/C2 OS=Homo sapiens OX=9606 GN=HNRNPC PE=1 SV=4	HNRNPC	1	0.00162161	121.73	ELTQIK(1)QK	2	-0.11977	1	0.759	0.827	0.763	1.119	1.159	1.175	1.47	0.00025512
P07910	176	K	Heterogeneous nuclear ribonucleoproteins C1/C2 OS=Homo sapiens OX=9606 GN=HNRNPC PE=1 SV=4	HNRNPC	1	4.37087e-06	137.4	SGFNSK(1)SGQR	2	0.17987	2	0.61	0.654	0.667	1.26	1.219	1.256	1.934	2.1133e-05
P07910	8	K	Heterogeneous nuclear ribonucleoproteins C1/C2 OS=Homo sapiens OX=9606 GN=HNRNPC PE=1 SV=4	HNRNPC	1	0.00104408	76.073	ASNVTNK(1)TDPR	2	0.85478	1	0.84	0.787	0.737	1.187	1.034	1.228	1.459	0.0043568
P07910	30	K	Heterogeneous nuclear ribonucleoproteins C1/C2 OS=Homo sapiens OX=9606 GN=HNRNPC PE=1 SV=4	HNRNPC	1	0.000920548	90.412	K(1)SDVEAIFSK	3	-1.0183	2	0.965	0.917	0.897	1.062	1.1	1.009	1.141	0.0164025
P07910	229	K	Heterogeneous nuclear ribonucleoproteins C1/C2 OS=Homo sapiens OX=9606 GN=HNRNPC PE=1 SV=4	HNRNPC	1	2.17919e-05	83.182	QAVEMK(1)NDK	2	-1.1976	3	0.811	0.853	0.885	1.117	1.069	1.133	1.302	0.0010047
P07954	221	K	Fumarate hydratase, mitochondrial OS=Homo sapiens OX=9606 GN=FH PE=1 SV=3	FH	1	0.0204453	47.894	LHDALDAK(1)SK	3	2.6711	1	1.02	1.048	1.004	0.996	1.029	0.947	0.967	0.28548
P07954	66	K	Fumarate hydratase, mitochondrial OS=Homo sapiens OX=9606 GN=FH PE=1 SV=3	FH	1	1.55347e-06	109.79	VPNDK(1)YYGAQTVR	2	-1.6403	2	1.143	1.122	1.139	0.931	0.891	0.925	0.807	0.000136177
P08174	161	K	Complement decay-accelerating factor OS=Homo sapiens OX=9606 GN=CD55 PE=1 SV=4	CD55	1	0.000511591	92.611	K(1)SCPNPGEIR	2	-0.92109	3	0.289	0.285	0.326	1.505	1.493	1.436	4.927	1.8954e-06
P08195	266	K	4F2 cell-surface antigen heavy chain OS=Homo sapiens OX=9606 GN=SLC3A2 PE=1 SV=3	SLC3A2	1	3.45387e-05	99.788	GLVLGPIHK(1)NQK	3	-0.25361	1	0.772	0.719	0.718	1.155	1.268	1.129	1.608	0.00037925
P08238	559	K	Heat shock protein HSP 90-beta OS=Homo sapiens OX=9606 GN=HSP90AB1 PE=1 SV=4	HSP90AB1	1	0.00072324	111.17	AK(1)FENLCK	3	-0.027707	2	1.508	1.469	1.398	0.714	0.677	0.704	0.479	1.56421e-05
P08238	538	K	Heat shock protein HSP 90-beta OS=Homo sapiens OX=9606 GN=HSP90AB1 PE=1 SV=4	HSP90AB1	1	2.794e-11	118.72	SLVSVTK(1)EGLELPEDEEEK	3	-0.94154	1	1.045	1.141	1.099	0.95	0.953	0.922	0.86	0.0054839
P08238	204	K	Heat shock protein HSP 90-beta OS=Homo sapiens OX=9606 GN=HSP90AB1 PE=1 SV=4	HSP90AB1	1	0.00016935	78.441	K(1)HSQFIGYPITLYLEK	3	-1.1026	2	1.193	1.263	1.155	0.845	0.846	0.911	0.721	0.00081745
P08238	53	K	Heat shock protein HSP 90-beta OS=Homo sapiens OX=9606 GN=HSP90AB1 PE=1 SV=4	HSP90AB1	1	2.2467e-23	169.15	ELISNASDALDK(1)IR	3	0.96439	2	0.873	1.034	0.988	0.999	0.994	1.088	1.064	0.33556
P08238	565	K	Heat shock protein HSP 90-beta OS=Homo sapiens OX=9606 GN=HSP90AB1 PE=1 SV=4	HSP90AB1	1	0.00141641	99.283	FENLCK(1)LMK	3	-0.68504	3	1.146	1.134	1.089	0.92	0.938	0.912	0.822	0.00037775
P08238	347	K	Heat shock protein HSP 90-beta OS=Homo sapiens OX=9606 GN=HSP90AB1 PE=1 SV=4	HSP90AB1	1	1.28779e-05	111.52	RAPFDLFENK(1)K	3	-0.19076	2	0.969	1.046	0.92	1	1.049	1.011	1.043	0.34386
P08238	107	K	Heat shock protein HSP 90-beta OS=Homo sapiens OX=9606 GN=HSP90AB1 PE=1 SV=4	HSP90AB1	1	3.52453e-35	179.1	ADLINNLGTIAK(1)SGTK	3	0.81594	4	0.999	1.027	0.997	0.971	1.035	0.995	0.993	0.73602
P08238	427	K	Heat shock protein HSP 90-beta OS=Homo sapiens OX=9606 GN=HSP90AB1 PE=1 SV=4	HSP90AB1	0.798361	2.40438e-06	102.65	CLELFSELAEDK(0.202)ENYK(0.798)K	4	-1.1195	1	1.032	1.038	1.053	0.957	1.061	0.916	0.939	0.28112
P08238	180	K	Heat shock protein HSP 90-beta OS=Homo sapiens OX=9606 GN=HSP90AB1 PE=1 SV=4	HSP90AB1	1	0.00094176	85.355	GTK(1)VILHLK	3	0.14558	4	1.025	1.045	1.097	0.947	0.957	0.997	0.916	0.026684
P08238	72	K	Heat shock protein HSP 90-beta OS=Homo sapiens OX=9606 GN=HSP90AB1 PE=1 SV=4	HSP90AB1	1	1.66273e-06	109.07	ELK(1)IDIIPNPQER	2	-1.8517	2	1.049	0.972	1.043	1.011	0.979	0.989	0.972	0.35254
P08238	399	K	Heat shock protein HSP 90-beta OS=Homo sapiens OX=9606 GN=HSP90AB1 PE=1 SV=4	HSP90AB1	1	3.26259e-08	113.22	EMLQQSK(1)ILK	2	-0.45482	7	0.953	0.927	0.892	1.064	1.096	1.015	1.145	0.0100014
P08238	275	K	Heat shock protein HSP 90-beta OS=Homo sapiens OX=9606 GN=HSP90AB1 PE=1 SV=4	HSP90AB1	1	8.83299e-22	178.22	EK(1)YIDQEELNK	3	-0.76611	4	0.841	0.844	0.873	1.136	1.129	1.052	1.297	0.00069559
P08238	64	K	Heat shock protein HSP 90-beta OS=Homo sapiens OX=9606 GN=HSP90AB1 PE=1 SV=4	HSP90AB1	1	5.30679e-29	174.62	YESLTDPSK(1)LDSGK	2	0.38428	2	0.94	0.916	0.961	1.062	1.089	0.991	1.115	0.025903
P08238	531	K	Heat shock protein HSP 90-beta OS=Homo sapiens OX=9606 GN=HSP90AB1 PE=1 SV=4	HSP90AB1	1	6.77377e-08	130.47	EFDGK(1)SLVSVTK	3	0.20457	2	1.097	1.106	1.095	0.932	0.954	0.931	0.854	5.524e-05
P08238	568	K	Heat shock protein HSP 90-beta OS=Homo sapiens OX=9606 GN=HSP90AB1 PE=1 SV=4	HSP90AB1	1	0.0129056	82.417	LMK(1)EILDK	2	-0.52759	1	2.117	2.005	1.986	0.335	0.306	0.291	0.153	1.0451e-06
P08238	284	K	Heat shock protein HSP 90-beta OS=Homo sapiens OX=9606 GN=HSP90AB1 PE=1 SV=4	HSP90AB1	1	2.20499e-15	164.64	YIDQEELNK(1)TK	2	0.13611	4	0.89	0.893	0.918	1.116	1.058	1.048	1.193	0.00129801
P08238	624	K	Heat shock protein HSP 90-beta OS=Homo sapiens OX=9606 GN=HSP90AB1 PE=1 SV=4	HSP90AB1	1	1.84699e-12	126.63	K(1)HLEINPDHPIVETLR	2	-0.3819	4	0.854	0.942	0.907	1.109	1.028	1.081	1.191	0.008499
P08238	557	K	Heat shock protein HSP 90-beta OS=Homo sapiens OX=9606 GN=HSP90AB1 PE=1 SV=4	HSP90AB1	1	0.0285507	80.219	MEESK(1)AK	2	0.84477	2	1.31	1.303	1.275	0.801	0.799	0.821	0.623	1.2245e-06
P08240	480	K	Signal recognition particle receptor subunit alpha OS=Homo sapiens OX=9606 GN=SRPRA PE=1 SV=2	SRPRA	1	0.00122724	58.32	LSALHPPEK(1)HGGR	4	-1.0202	1	0.875	0.888	0.907	1.115	1.115	1.012	1.214	0.0047049
P08243	203	K	Asparagine synthetase [glutamine-hydrolyzing] OS=Homo sapiens OX=9606 GN=ASNS PE=1 SV=4	ASNS	1	1.21592e-05	103.43	VASVEMVK(1)YHHCR	3	0.11185	3	1.123	1.166	1.078	0.917	0.927	0.927	0.823	0.0136599
P08243	511	K	Asparagine synthetase [glutamine-hydrolyzing] OS=Homo sapiens OX=9606 GN=ASNS PE=1 SV=4	ASNS	1	0.0309821	61.815	FPFNTPK(1)TK	3	0.51588	2	0.984	1.022	1.017	0.967	0.995	1.035	0.991	0.7191
P08243	478	K	Asparagine synthetase [glutamine-hydrolyzing] OS=Homo sapiens OX=9606 GN=ASNS PE=1 SV=4	ASNS	1	3.16002e-05	92.38	EAFSDGITSVK(1)NSWFK	3	-0.30627	1	0.97	0.977	1.009	1.042	1.097	0.912	1.032	0.63632
P08397	128	K	Porphobilinogen deaminase OS=Homo sapiens OX=9606 GN=HMBS PE=1 SV=2	HMBS	1	0.000112183	75.018	ENPHDAVVFHPK(1)FVGK	4	-0.53721	1	1.261	1.054	1.111	0.945	0.825	0.968	0.799	0.037256
P08397	157	K	Porphobilinogen deaminase OS=Homo sapiens OX=9606 GN=HMBS PE=1 SV=2	HMBS	1	0.015202	65.465	K(1)FPHLEFR	3	-0.27741	1	0.571	0.906	0.789	0.9	1.85	0.751	1.545	0.2916
P08514	708	K	Integrin alpha-IIb OS=Homo sapiens OX=9606 GN=ITGA2B PE=1 SV=3	ITGA2B	1	0.0268708	91.626	LICNQK(1)K	2	1.3796	1	1.196	1.063	1.091	0.954	0.893	0.94	0.832	0.0110967
P08559	385	K	Pyruvate dehydrogenase E1 component subunit alpha, somatic form, mitochondrial OS=Homo sapiens OX=9606 GN=PDHA1 PE=1 SV=3	PDHA1	1	0.0134525	72.928	GANQWIK(1)FK	2	-1.5857	1	1.032	1.071	1.201	0.942	0.917	0.95	0.85	0.026777
P08559	83	K	Pyruvate dehydrogenase E1 component subunit alpha, somatic form, mitochondrial OS=Homo sapiens OX=9606 GN=PDHA1 PE=1 SV=3	PDHA1	1	0.0168939	57.59	ADQLYK(1)QK	3	0.32031	1	1.467	1.39	1.435	0.751	0.695	0.704	0.501	1.87116e-05
P08559	321	K	Pyruvate dehydrogenase E1 component subunit alpha, somatic form, mitochondrial OS=Homo sapiens OX=9606 GN=PDHA1 PE=1 SV=3	PDHA1	1	0.000127501	116.74	SDPIMLLK(1)DR	3	-0.61511	3	1.475	1.483	1.42	0.691	0.66	0.738	0.477	3.5027e-05
P08559	313	K	Pyruvate dehydrogenase E1 component subunit alpha, somatic form, mitochondrial OS=Homo sapiens OX=9606 GN=PDHA1 PE=1 SV=3	PDHA1	1	0.000353207	107.09	SK(1)SDPIMLLK	2	-0.43555	2	1.553	1.469	1.495	0.707	0.659	0.636	0.443	2.0296e-05
P08574	310	K	Cytochrome c1, heme protein, mitochondrial OS=Homo sapiens OX=9606 GN=CYC1 PE=1 SV=3	CYC1	1	0.00684036	81.296	HK(1)WSVLK	3	-0.1315	1	1.022	0.948	0.942	1.026	1.066	0.988	1.058	0.1746
P08579	101	K	U2 small nuclear ribonucleoprotein B'' OS=Homo sapiens OX=9606 GN=SNRPB2 PE=1 SV=1	SNRPB2	1	0.00561659	94.692	GTFADK(1)EK	2	0.3577	1	1.047	0.899	0.948	1.041	0.999	1.052	1.068	0.2248
P08579	111	K	U2 small nuclear ribonucleoprotein B'' OS=Homo sapiens OX=9606 GN=SNRPB2 PE=1 SV=1	SNRPB2	1	0.00129459	61.409	AK(1)TVEQTATTTNK	3	-0.061918	1	1.008	0.917	0.967	0.928	1.069	1.088	1.067	0.3343
P08581	1193	K	Hepatocyte growth factor receptor OS=Homo sapiens OX=9606 GN=MET PE=1 SV=4	MET	1	0.017028	79.148	GMK(1)YLASK	2	-1.016	1	1.012	1.106	1.114	0.903	0.984	0.968	0.883	0.038023
P08581	695	K	Hepatocyte growth factor receptor OS=Homo sapiens OX=9606 GN=MET PE=1 SV=4	MET	1	0.00208638	63.091	HISIGGK(1)TCTLK	3	0.0048841	1	1.037	1.173	1.076	0.859	0.995	0.965	0.858	0.056138
P08581	1215	K	Hepatocyte growth factor receptor OS=Homo sapiens OX=9606 GN=MET PE=1 SV=4	MET	1	0.00254286	66.267	NCMLDEK(1)FTVK	3	0.751	1	1.339	1.257	1.279	0.794	0.872	0.766	0.628	0.00040379
P08621	27	K	U1 small nuclear ribonucleoprotein 70 kDa OS=Homo sapiens OX=9606 GN=SNRNP70 PE=1 SV=2	SNRNP70	1	0.000270978	60.307	DPIPYLPPLEK(1)LPHEK	4	-0.36529	2	1.129	0.975	1.044	0.964	0.993	0.965	0.928	0.16928
P08621	130	K	U1 small nuclear ribonucleoprotein 70 kDa OS=Homo sapiens OX=9606 GN=SNRNP70 PE=1 SV=2	SNRNP70	1	5.10899e-07	136.52	EFEVYGPIK(1)R	2	-2.6182	1	0.757	0.789	0.786	1.196	1.135	1.136	1.487	5.6751e-05
P08621	162	K	U1 small nuclear ribonucleoprotein 70 kDa OS=Homo sapiens OX=9606 GN=SNRNP70 PE=1 SV=2	SNRNP70	1	2.44453e-05	100.22	DMHSAYK(1)HADGK	3	-0.87804	6	0.807	0.91	0.902	1.157	1.065	1.054	1.251	0.0099174
P08708	19	K	40S ribosomal protein S17 OS=Homo sapiens OX=9606 GN=RPS17 PE=1 SV=2	RPS17	1	0.00467157	78.136	VIIEK(1)YYTR	3	2.9407	2	0.924	1.011	0.994	1.014	1.059	0.991	1.046	0.24974
P08708	44	K	40S ribosomal protein S17 OS=Homo sapiens OX=9606 GN=RPS17 PE=1 SV=2	RPS17	1	6.17763e-06	84.365	VCEEIAIIPSK(1)K	2	-0.27798	2	1.099	1.119	1.215	0.872	0.912	0.937	0.793	0.0034178
P08758	309	K	Annexin A5 OS=Homo sapiens OX=9606 GN=ANXA5 PE=1 SV=2	ANXA5	1	0.0118738	74.841	GDTSGDYK(1)K	3	-0.23901	3	0.895	0.903	0.882	1.111	1.038	1.086	1.207	0.00088124
P08758	76	K	Annexin A5 OS=Homo sapiens OX=9606 GN=ANXA5 PE=1 SV=2	ANXA5	1	0.00140664	96.229	SELTGK(1)FEK	3	1.0367	2	0.9	1.011	0.949	1.098	0.961	1.053	1.088	0.179736
P08865	52	K	40S ribosomal protein SA OS=Homo sapiens OX=9606 GN=RPSA PE=1 SV=4	RPSA	1	0.0100935	66.267	SDGIYIINLK(1)R	2	-0.44137	1	1.041	0.964	0.943	1.045	0.953	1.059	1.037	0.46428
P08865	42	K	40S ribosomal protein SA OS=Homo sapiens OX=9606 GN=RPSA PE=1 SV=4	RPSA	1	0.00015626	98.942	K(1)SDGIYIINLK	3	-0.58345	2	0.911	0.921	0.936	1.043	1.11	1.02	1.146	0.006835
P08865	57	K	40S ribosomal protein SA OS=Homo sapiens OX=9606 GN=RPSA PE=1 SV=4	RPSA	1	4.77775e-05	120.86	TWEK(1)LLLAAR	2	-0.082755	1	0.899	0.957	0.952	1.093	1.004	1.05	1.121	0.022901
P09001	235	K	39S ribosomal protein L3, mitochondrial OS=Homo sapiens OX=9606 GN=MRPL3 PE=1 SV=1	MRPL3	1	7.32746e-11	124.42	GQPATHGQTK(1)THR	3	-0.88038	2	0.604	0.565	0.712	1.324	1.19	1.258	2.005	0.00074339
P09211	128	K	Glutathione S-transferase P OS=Homo sapiens OX=9606 GN=GSTP1 PE=1 SV=2	GSTP1	1	1.46764e-21	138.05	ALPGQLK(1)PFETLLSQNQGGK	3	1.1443	3	1.059	1.057	1.13	0.964	1.027	0.863	0.879	0.077525
P09211	209	K	Glutathione S-transferase P OS=Homo sapiens OX=9606 GN=GSTP1 PE=1 SV=2	GSTP1	1	3.60265e-06	71.601	AFLASPEYVNLPINGNGK(1)Q	3	-0.036343	1	1.243	1.268	1.2	0.846	0.896	0.799	0.685	0.00049903
P09234	22	K	U1 small nuclear ribonucleoprotein C OS=Homo sapiens OX=9606 GN=SNRPC PE=1 SV=1	SNRPC	1	0.00671323	88.921	K(1)THCSGR	2	-0.90683	2	1.814	1.775	1.824	0.441	0.469	0.482	0.257	5.074e-07
P09382	108	K	Galectin-1 OS=Homo sapiens OX=9606 GN=LGALS1 PE=1 SV=2	LGALS1	1	0.000103701	101.38	LPDGYEFK(1)FPNR	2	-2.6893	2	0.957	0.998	0.955	1.047	1.009	1.025	1.059	0.033064
P09429	50	K	High mobility group protein B1 OS=Homo sapiens OX=9606 GN=HMGB1 PE=1 SV=3	HMGB1	1	0.0185525	64.567	WK(1)TMSAK	3	-0.52405	1	1.515	1.361	1.429	0.766	0.686	0.694	0.498	0.000119089
P09429	127	K	High mobility group protein B1 OS=Homo sapiens OX=9606 GN=HMGB1 PE=1 SV=3	HMGB1	1	8.16707e-06	103.76	GEHPGLSIGDVAK(1)K	3	0.13357	1	1.025	0.869	0.964	1.051	1.037	1.029	1.091	0.20834
P09429	90	K	High mobility group protein B1 OS=Homo sapiens OX=9606 GN=HMGB1 PE=1 SV=3	HMGB1	1	0.014499	80.688	FK(1)DPNAPK	2	-0.291	2	0.677	0.691	0.704	1.289	1.223	1.136	1.761	0.000121985
P09429	114	K	High mobility group protein B1 OS=Homo sapiens OX=9606 GN=HMGB1 PE=1 SV=3	HMGB1	1	8.74531e-05	89.358	IK(1)GEHPGLSIGDVAK	3	-0.089529	1	0.688	0.869	0.818	1.217	1.15	1.071	1.448	0.0091964
P09429	167	K	High mobility group protein B1 OS=Homo sapiens OX=9606 GN=HMGB1 PE=1 SV=3	HMGB1	1	0.0370467	76.679	GK(1)PDAAK	2	-1.6077	1	0.903	0.933	0.852	1.084	1.076	1.067	1.201	0.0024368
P09429	59	K	High mobility group protein B1 OS=Homo sapiens OX=9606 GN=HMGB1 PE=1 SV=3	HMGB1	1	0.00561659	94.692	GK(1)FEDMAK	2	0.94631	1	0.774	0.769	0.82	1.165	1.139	1.141	1.458	6.1857e-05
P09429	30	K	High mobility group protein B1 OS=Homo sapiens OX=9606 GN=HMGB1 PE=1 SV=3	HMGB1	1	5.57343e-06	106.38	K(1)HPDASVNFSEFSK	3	0.2832	5	0.822	0.871	0.874	1.106	1.099	1.103	1.289	0.0061365
P09429	157	K	High mobility group protein B1 OS=Homo sapiens OX=9606 GN=HMGB1 PE=1 SV=3	HMGB1	1	0.00142645	102.42	YEK(1)DIAAYR	2	-1.0365	1	1.015	0.921	0.925	1.039	1.071	1.005	1.089	0.079356
P09429	43	K	High mobility group protein B1 OS=Homo sapiens OX=9606 GN=HMGB1 PE=1 SV=3	HMGB1	1	2.48512e-05	93.424	KHPDASVNFSEFSK(1)K	4	-1.2695	1	1.126	1.07	1.209	0.926	0.943	0.878	0.807	0.0066601
P09429	65	K	High mobility group protein B1 OS=Homo sapiens OX=9606 GN=HMGB1 PE=1 SV=3	HMGB1	0.997308	0.029767	43.761	GK(0.003)FEDMAK(0.997)ADK	3	2.1691	1	0.845	0.811	1.003	1.09	1.073	1.083	1.221	0.089018
P09429	82	K	High mobility group protein B1 OS=Homo sapiens OX=9606 GN=HMGB1 PE=1 SV=3	HMGB1	1	0.00187248	84.882	TYIPPK(1)GETK	3	0.7454	2	0.831	0.806	1.014	1.071	1.13	1.05	1.226	0.050057
P09486	204	K	SPARC OS=Homo sapiens OX=9606 GN=SPARC PE=1 SV=1	SPARC	1	0.0177695	71.342	IHENEK(1)R	3	-0.24775	1	0.684	0.983	0.859	1.046	1.006	1.269	1.315	0.094276
P09496	156	K	Clathrin light chain A OS=Homo sapiens OX=9606 GN=CLTA PE=1 SV=1	CLTA	1	0.0154232	71.085	QDEQLQK(1)TK	2	1.5769	1	0.996	1.128	0.944	1.004	0.968	0.999	0.968	0.61432
P09496	223	K	Clathrin light chain A OS=Homo sapiens OX=9606 GN=CLTA PE=1 SV=1	CLTA	1	0.000256474	97.779	LCDFNPK(1)SSK	3	-1.0743	2	1.189	1.178	1.133	0.893	0.898	0.892	0.767	0.0031407
P09497	204	K	Clathrin light chain B OS=Homo sapiens OX=9606 GN=CLTB PE=1 SV=1	CLTB	1	0.000999219	64.104	VAQLCDFNPK(1)SSK	3	-0.0017591	1	1.294	1.166	0.991	0.877	0.943	0.901	0.788	0.044778
P09525	246	K	Annexin A4 OS=Homo sapiens OX=9606 GN=ANXA4 PE=1 SV=4	ANXA4	1	0.00128047	110.08	NK(1)SAYFAEK	3	0.016765	4	1.42	1.357	1.365	0.766	0.748	0.738	0.544	2.2378e-06
P09525	57	K	Annexin A4 OS=Homo sapiens OX=9606 GN=ANXA4 PE=1 SV=4	ANXA4	1	0.00341182	86.014	TAYK(1)STIGR	2	0.6095	2	0.899	0.906	0.886	1.105	1.096	1.028	1.2	0.00156346
P09525	259	K	Annexin A4 OS=Homo sapiens OX=9606 GN=ANXA4 PE=1 SV=4	ANXA4	1	5.01048e-05	99.711	SMK(1)GLGTDDNTLIR	2	-1.4086	1	0.882	0.831	1.039	1.055	1.059	1.067	1.156	0.155076
P09525	185	K	Annexin A4 OS=Homo sapiens OX=9606 GN=ANXA4 PE=1 SV=4	ANXA4	1	0.00662495	93.096	K(1)WGTDEVK	2	-0.14424	1	0.992	0.976	0.912	1.056	1.032	1.014	1.077	0.057461
P09525	253	K	Annexin A4 OS=Homo sapiens OX=9606 GN=ANXA4 PE=1 SV=4	ANXA4	1	0.000246964	111.63	SAYFAEK(1)LYK	2	-0.039456	2	0.857	0.842	0.848	1.124	1.129	1.071	1.305	0.000116497
P09525	213	K	Annexin A4 OS=Homo sapiens OX=9606 GN=ANXA4 PE=1 SV=4	ANXA4	1	3.47654e-06	106.67	NHLLHVFDEYK(1)R	3	-0.10639	2	0.944	0.836	0.842	1.114	1.049	1.113	1.249	0.0071004
P09543	162	K	2',3'-cyclic-nucleotide 3'-phosphodiesterase OS=Homo sapiens OX=9606 GN=CNP PE=1 SV=2	CNP	1	0.000648808	91.961	LDCAQLK(1)EK	2	2.2369	2	1.297	1.461	1.2	0.809	0.783	0.783	0.6	0.0009578
P09622	159	K	Dihydrolipoyl dehydrogenase, mitochondrial OS=Homo sapiens OX=9606 GN=DLD PE=1 SV=2	DLD	1	0.000308157	93.478	ITGK(1)NQVTATK	2	2.1285	2	1.151	1.098	1.085	0.895	0.94	0.957	0.837	0.0027447
P09622	445	K	Dihydrolipoyl dehydrogenase, mitochondrial OS=Homo sapiens OX=9606 GN=DLD PE=1 SV=2	DLD	1	0.0370398	58.699	ILGQK(1)STDR	2	-0.35129	1	1.101	1.068	1.176	0.934	0.992	0.86	0.833	0.021584
P09622	127	K	Dihydrolipoyl dehydrogenase, mitochondrial OS=Homo sapiens OX=9606 GN=DLD PE=1 SV=2	DLD	1	2.95433e-07	140.24	MMEQK(1)STAVK	3	0.14911	3	1.206	1.168	1.106	0.915	0.854	0.928	0.775	0.0021023
P09622	166	K	Dihydrolipoyl dehydrogenase, mitochondrial OS=Homo sapiens OX=9606 GN=DLD PE=1 SV=2	DLD	1	9.76768e-27	145.91	NQVTATK(1)ADGGTQVIDTK	3	-0.33408	2	1.155	1.166	1.159	0.912	0.902	0.881	0.774	1.86521e-05
P09622	66	K	Dihydrolipoyl dehydrogenase, mitochondrial OS=Homo sapiens OX=9606 GN=DLD PE=1 SV=2	DLD	1	6.84578e-17	148.57	AAQLGFK(1)TVCIEK	2	0.7406	2	1.537	1.514	1.534	0.697	0.632	0.626	0.426	0.00164226
P09622	277	K	Dihydrolipoyl dehydrogenase, mitochondrial OS=Homo sapiens OX=9606 GN=DLD PE=1 SV=2	DLD	1	0.000308554	109	LNTK(1)VTGATK	2	-0.00023831	2	1.188	1.087	1.101	0.945	0.856	0.968	0.82	0.0131185
P09622	430	K	Dihydrolipoyl dehydrogenase, mitochondrial OS=Homo sapiens OX=9606 GN=DLD PE=1 SV=2	DLD	1	3.18861e-06	108.58	AK(1)TNADTDGMVK	2	0.13245	2	1.067	1	0.955	0.994	1.002	1.01	0.995	0.907
P09651	350	K	Heterogeneous nuclear ribonucleoprotein A1 OS=Homo sapiens OX=9606 GN=HNRNPA1 PE=1 SV=5	HNRNPA1	1	2.48886e-22	150.39	SSGPYGGGGQYFAK(1)PR	2	-0.1056	2	0.967	0.984	1.016	1.063	0.999	0.98	1.025	0.43706
P09651	166	K	Heterogeneous nuclear ribonucleoprotein A1 OS=Homo sapiens OX=9606 GN=HNRNPA1 PE=1 SV=5	HNRNPA1	1	1.73912e-26	147.64	IVIQK(1)YHTVNGHNCEVR	3	-1.2743	14	0.987	0.949	0.952	1.016	1.066	1.012	1.071	0.0303
P09651	3	K	Heterogeneous nuclear ribonucleoprotein A1 OS=Homo sapiens OX=9606 GN=HNRNPA1 PE=1 SV=5	HNRNPA1	1	0.0313201	51.528	SK(1)SESPK	2	0.11692	1	1.202	1.101	1.044	0.942	0.909	0.939	0.834	0.0133436
P09651	78	K	Heterogeneous nuclear ribonucleoprotein A1 OS=Homo sapiens OX=9606 GN=HNRNPA1 PE=1 SV=5	HNRNPA1	1	0.00536023	86.794	PHK(1)VDGR	3	-0.16724	2	1.022	1.157	1	1.033	0.87	0.995	0.912	0.24924
P09651	105	K	Heterogeneous nuclear ribonucleoprotein A1 OS=Homo sapiens OX=9606 GN=HNRNPA1 PE=1 SV=5	HNRNPA1	1	0.000353752	77.776	EDSQRPGAHLTVK(1)K	3	-0.32852	2	0.768	0.733	0.803	1.186	1.276	1.029	1.515	0.0038216
P09661	149	K	U2 small nuclear ribonucleoprotein A' OS=Homo sapiens OX=9606 GN=SNRPA1 PE=1 SV=2	SNRPA1	1	0.0174145	71.451	VLDFQK(1)VK	2	-1.9356	1
P09661	67	K	U2 small nuclear ribonucleoprotein A' OS=Homo sapiens OX=9606 GN=SNRPA1 PE=1 SV=2	SNRPA1	1	0.000992957	89.805	LK(1)TLLVNNNR	2	-1.1634	2	0.866	0.889	0.92	1.06	1.069	1.105	1.209	0.00092356
P09661	179	K	U2 small nuclear ribonucleoprotein A' OS=Homo sapiens OX=9606 GN=SNRPA1 PE=1 SV=2	SNRPA1	1	0.0110456	44.252	SK(1)TFNPGAGLPTDK	3	0.56067	1	0.81	0.806	0.84	1.171	1.131	1.084	1.379	0.00024112
P09874	203	K	Poly [ADP-ribose] polymerase 1 OS=Homo sapiens OX=9606 GN=PARP1 PE=1 SV=4	PARP1	1	0.00838853	56.404	QLPGVK(1)SEGK	3	0.069112	1
P09874	662	K	Poly [ADP-ribose] polymerase 1 OS=Homo sapiens OX=9606 GN=PARP1 PE=1 SV=4	PARP1	1	6.13079e-07	134.18	LTVNPGTK(1)SK	2	-0.13631	1	1.05	1.015	1.111	0.947	0.998	0.954	0.913	0.04298
P09874	105	K	Poly [ADP-ribose] polymerase 1 OS=Homo sapiens OX=9606 GN=PARP1 PE=1 SV=4	PARP1	1	0.00017866	96.464	GQDGIGSK(1)AEK	3	-0.31589	2	0.818	0.865	0.754	1.116	1.144	1.136	1.394	0.00119677
P09960	580	K	Leukotriene A-4 hydrolase OS=Homo sapiens OX=9606 GN=LTA4H PE=1 SV=2	LTA4H	1	0.00061233	64.842	DLAAFDK(1)SHDQAVR	3	-0.2776	1
P09960	20	K	Leukotriene A-4 hydrolase OS=Homo sapiens OX=9606 GN=LTA4H PE=1 SV=2	LTA4H	1	0.00282882	97.798	TK(1)HLHLR	3	0.43933	1	1.211	1.074	1.26	0.755	0.869	1.016	0.745	0.037996
P0C0S5	8	K	Histone H2A.Z OS=Homo sapiens OX=9606 GN=H2AZ1 PE=1 SV=2	H2AZ1	1	2.41356e-07	111.64	AGK(1)DSGK(1)AK(1)TK	2	0.79948	12	0.591	0.582	0.583	1.323	1.257	1.278	2.197	4.9094e-07
P0C0S5	12	K	Histone H2A.Z OS=Homo sapiens OX=9606 GN=H2AZ1 PE=1 SV=2	H2AZ1	1	2.41356e-07	111.64	AGK(1)DSGK(1)AK(1)TK	2	0.79948	10	0.585	0.579	0.575	1.326	1.264	1.279	2.225	3.9617e-07
P0C0S5	14	K	Histone H2A.Z OS=Homo sapiens OX=9606 GN=H2AZ1 PE=1 SV=2	H2AZ1	1	2.41356e-07	106.57	AGK(1)DSGK(1)AK(1)TK	2	0.79948	4	0.511	0.491	0.48	1.402	1.295	1.348	2.729	2.1717e-06
P0C0S5	5	K	Histone H2A.Z OS=Homo sapiens OX=9606 GN=H2AZ1 PE=1 SV=2	H2AZ1	1	2.41356e-07	111.64	AGGK(1)AGK(1)DSGK(1)AK(1)TK	2	0.11281	10	0.749	0.714	0.689	1.227	1.164	1.201	1.669	5.8561e-05
P0C221	258	K	Coiled-coil domain-containing protein 175 OS=Homo sapiens OX=9606 GN=CCDC175 PE=4 SV=2	CCDC175	1	0.0369598	41.652	METYQK(1)K	3	-0.74451	1
P0C7M7	566	K	Acyl-coenzyme A synthetase ACSM4, mitochondrial OS=Homo sapiens OX=9606 GN=ACSM4 PE=2 SV=1	ACSM4	1	0.0260859	81.296	TITGK(1)IK	2	0.050763	1	0.69	0.592	0.664	1.211	1.257	1.259	1.915	0.000163329
P0C7V7	87	K	Putative signal peptidase complex catalytic subunit SEC11B OS=Homo sapiens OX=9606 GN=SEC11B PE=5 SV=1	SEC11B	1	0.00632618	83.206	VLK(1)IHEK	2	-0.94902	2	0.948	0.848	0.862	1.135	1.082	1.039	1.225	0.0091813
P0C7V7	101	K	Putative signal peptidase complex catalytic subunit SEC11B OS=Homo sapiens OX=9606 GN=SEC11B PE=5 SV=1	SEC11B	1	7.83412e-17	147.1	FLTK(1)GDNNAVDDR	2	-2.9991	1	0.963	0.905	1.02	1.006	1.094	0.991	1.07	0.21456
P0CB38	6	K	Polyadenylate-binding protein 4-like OS=Homo sapiens OX=9606 GN=PABPC4L PE=2 SV=1	PABPC4L	1	0.0370593	44.692	NVAAK(1)YR	3	0.8477	1	0.749	0.853	0.869	1.085	1.168	1.114	1.363	0.0037813
P0DMV9	246	K	Heat shock 70 kDa protein 1B OS=Homo sapiens OX=9606 GN=HSPA1B PE=1 SV=1	HSPA1B	1	3.52072e-15	160.86	LVNHFVEEFK(1)R	2	-0.45068	2	0.891	0.904	0.882	1.121	1.084	1.033	1.21	0.00156153
P0DMV9	71	K	Heat shock 70 kDa protein 1B OS=Homo sapiens OX=9606 GN=HSPA1B PE=1 SV=1	HSPA1B	1	2.62946e-28	168.42	NQVALNPQNTVFDAK(1)R	2	0.7028	2	0.707	0.816	0.811	1.188	1.139	1.138	1.485	0.00125575
P0DMV9	328	K	Heat shock 70 kDa protein 1B OS=Homo sapiens OX=9606 GN=HSPA1B PE=1 SV=1	HSPA1B	1	1.01278e-06	104.84	LDK(1)AQIHDLVLVGGSTR	3	0.24145	1	0.927	0.77	0.873	1.084	1.098	1.127	1.288	0.0102189
P0DMV9	108	K	Heat shock 70 kDa protein 1B OS=Homo sapiens OX=9606 GN=HSPA1B PE=1 SV=1	HSPA1B	1	5.52415e-06	131.69	VQVSYK(1)GETK	2	-0.30841	2	0.906	0.937	0.932	1.104	1.056	1.012	1.143	0.0080629
P0DMV9	112	K	Heat shock 70 kDa protein 1B OS=Homo sapiens OX=9606 GN=HSPA1B PE=1 SV=1	HSPA1B	1	8.71947e-05	62.739	GETK(1)AFYPEEISSMVLTK	3	0.1268	1	0.819	0.994	0.999	1.105	0.986	1.05	1.117	0.195359
P0DMV9	77	K	Heat shock 70 kDa protein 1B OS=Homo sapiens OX=9606 GN=HSPA1B PE=1 SV=1	HSPA1B	1	6.4636e-18	162.37	K(1)FGDPVVQSDMK	2	-0.4646	2	0.856	0.841	0.875	1.099	1.112	1.096	1.286	3.6874e-05
P0DMV9	526	K	Heat shock 70 kDa protein 1B OS=Homo sapiens OX=9606 GN=HSPA1B PE=1 SV=1	HSPA1B	1	0.00144127	107.06	YK(1)AEDEVQR	2	0.026894	1	0.957	0.905	0.857	1.042	1.119	1.047	1.18	0.013476
P0DMV9	56	K	Heat shock 70 kDa protein 1B OS=Homo sapiens OX=9606 GN=HSPA1B PE=1 SV=1	HSPA1B	1	1.6114e-13	110.4	LIGDAAK(1)NQVALNPQNTVFDAK	4	-0.26798	2	0.976	1.003	1.035	0.997	0.993	1.017	0.998	0.91538
P0DMV9	500	K	Heat shock 70 kDa protein 1B OS=Homo sapiens OX=9606 GN=HSPA1B PE=1 SV=1	HSPA1B	1	0.000248863	107.09	ANK(1)ITITNDK	2	-0.73799	2	1.221	1.21	1.247	0.898	0.823	0.843	0.697	0.00019678
P0DMV9	507	K	Heat shock 70 kDa protein 1B OS=Homo sapiens OX=9606 GN=HSPA1B PE=1 SV=1	HSPA1B	1	2.06296e-08	152.27	ITITNDK(1)GR	2	-0.26924	2	0.952	0.933	0.927	1.093	1.046	1.01	1.12	0.0096191
P0DMV9	100	K	Heat shock 70 kDa protein 1B OS=Homo sapiens OX=9606 GN=HSPA1B PE=1 SV=1	HSPA1B	1	0.000344432	71.879	HWPFQVINDGDK(1)PK	3	-1.6221	1	0.933	0.992	1.025	0.985	1.114	0.951	1.034	0.59658
P0DN37	31	K	Peptidyl-prolyl cis-trans isomerase A-like 4G OS=Homo sapiens OX=9606 GN=PPIAL4G PE=3 SV=1	PPIAL4G	1	0.0273309	63.694	IPK(1)TAENFR	2	1.8054	1	1.062	1.099	1.09	0.983	0.951	0.916	0.877	0.0044644
P0DN76	15	K	Splicing factor U2AF 35 kDa subunit-like protein OS=Homo sapiens OX=9606 GN=U2AF1L5 PE=1 SV=1	U2AF1L5	1	0.00108301	89.301	DK(1)VNCSFYFK	2	-1.0517	1	1.643	1.874	1.821	0.45	0.478	0.507	0.269	1.77129e-05
P0DN79	485	K	Cystathionine beta-synthase-like protein OS=Homo sapiens OX=9606 GN=CBSL PE=1 SV=1	CBSL	1	0.0207716	86.472	VIYK(1)QFK	2	1.091	1
P0DN79	211	K	Cystathionine beta-synthase-like protein OS=Homo sapiens OX=9606 GN=CBSL PE=1 SV=1	CBSL	1	0.000548105	61.127	LK(1)NEIPNSHILDQYR	3	-0.078619	1	0.92	0.85	0.931	1.083	1.062	1.076	1.193	0.0037221
P0DP25	95	K	Calmodulin-3 OS=Homo sapiens OX=9606 GN=CALM3 PE=1 SV=1	CALM3	1	4.36614e-07	109.77	VFDK(1)DGNGYISAAELR	2	-0.30357	1	0.822	0.8	0.863	1.133	1.07	1.16	1.353	0.00075793
P0DPI2	233	K	Glutamine amidotransferase-like class 1 domain-containing protein 3A, mitochondrial OS=Homo sapiens OX=9606 GN=GATD3A PE=1 SV=1	GATD3A	1	6.17402e-07	111.94	EVVEAHVDQK(1)NK	3	0.071397	1	1.23	1.307	1.197	0.867	0.829	0.83	0.676	0.000199031
P0DPI2	219	K	Glutamine amidotransferase-like class 1 domain-containing protein 3A, mitochondrial OS=Homo sapiens OX=9606 GN=GATD3A PE=1 SV=1	GATD3A	1	0.00396169	71.379	ALGAK(1)HCVK	3	-0.43799	1	0.647	0.736	0.824	1.169	1.154	1.223	1.607	0.0026612
P10145	91	K	Interleukin-8 OS=Homo sapiens OX=9606 GN=CXCL8 PE=1 SV=1	CXCL8	1	0.00869119	101.43	VVEK(1)FLK	2	0.050781	1	0.763	0.752	0.853	1.1	1.182	1.158	1.453	0.00115819
P10155	359	K	60 kDa SS-A/Ro ribonucleoprotein OS=Homo sapiens OX=9606 GN=RO60 PE=1 SV=2	RO60	1	0.0107819	52.247	ALDAAFYK(1)TFK	3	0.57811	1	1.011	0.895	1.152	1.059	0.925	0.996	0.974	0.80296
P10412	63	K	Histone H1.4 OS=Homo sapiens OX=9606 GN=H1-4 PE=1 SV=2	H1-4	1	0.000637306	85.355	SGVSLAALK(1)K	3	0.16261	1	0.734	0.735	0.733	1.191	1.181	1.184	1.615	2.6726e-09
P10412	64	K	Histone H1.4 OS=Homo sapiens OX=9606 GN=H1-4 PE=1 SV=2	H1-4	1	0.00505939	55.261	K(1)ALAAAGYDVEK	3	0.24418	1
P10412	46	K	Histone H1.4 OS=Homo sapiens OX=9606 GN=H1-4 PE=1 SV=2	H1-4	1	7.34689e-10	115.73	ASGPPVSELITK(1)AVAASK	3	-0.45413	1	1.154	1.065	1.161	0.874	0.929	0.956	0.816	0.0061393
P10412	75	K	Histone H1.4 OS=Homo sapiens OX=9606 GN=H1-4 PE=1 SV=2	H1-4	1	0.000228499	76.01	ALAAAGYDVEK(1)NNSR	2	-0.42153	2	0.777	0.83	0.858	0.969	1.201	1.195	1.365	0.0159196
P10412	168	K	Histone H1.4 OS=Homo sapiens OX=9606 GN=H1-4 PE=1 SV=2	H1-4	1	0.000130087	78.513	KPAAAAGAK(1)K	3	-0.18685	1
P10515	637	K	Dihydrolipoyllysine-residue acetyltransferase component of pyruvate dehydrogenase complex, mitochondrial OS=Homo sapiens OX=9606 GN=DLAT PE=1 SV=3	DLAT	0.999993	0.00319051	86.772	K(1)YLEKPITMLL	2	1.049	1	1.127	1.229	1.207	0.923	0.853	0.863	0.741	0.00113953
P10515	473	K	Dihydrolipoyllysine-residue acetyltransferase component of pyruvate dehydrogenase complex, mitochondrial OS=Homo sapiens OX=9606 GN=DLAT PE=1 SV=3	DLAT	1	2.21307e-09	145.6	SK(1)ISVNDFIIK	2	-1.768	2	1.085	1.034	1.114	0.933	0.991	0.936	0.885	0.0139409
P10599	8	K	Thioredoxin OS=Homo sapiens OX=9606 GN=TXN PE=1 SV=3	TXN	1	9.09227e-27	146.81	QIESK(1)TAFQEALDAAGDK	4	-0.19043	3	1.131	1.055	1.076	0.937	0.944	0.961	0.871	0.0033575
P10599	39	K	Thioredoxin OS=Homo sapiens OX=9606 GN=TXN PE=1 SV=3	TXN	1	0.00611509	53.448	MIK(1)PFFHSLSEK	3	-0.095239	1	1.105	0.999	1.136	0.833	1.039	0.978	0.88	0.162478
P10599	94	K	Thioredoxin OS=Homo sapiens OX=9606 GN=TXN PE=1 SV=3	TXN	1	2.339e-06	129.37	VGEFSGANK(1)EK	2	0.354	2	0.973	0.925	0.857	1.107	1.012	1.069	1.157	0.031542
P10606	57	K	Cytochrome c oxidase subunit 5B, mitochondrial OS=Homo sapiens OX=9606 GN=COX5B PE=1 SV=2	COX5B	1	0.00283587	63.091	K(1)GLDPYNVLAPK	2	1.4154	2	1.244	1.189	1.169	0.841	0.874	0.897	0.725	0.00025998
P10620	42	K	Microsomal glutathione S-transferase 1 OS=Homo sapiens OX=9606 GN=MGST1 PE=1 SV=1	MGST1	1	0.00134831	59.248	K(1)VFANPEDCVAFGK	3	-0.50976	1	0.978	0.943	1.078	0.939	0.944	1.127	1.004	0.98328
P10620	55	K	Microsomal glutathione S-transferase 1 OS=Homo sapiens OX=9606 GN=MGST1 PE=1 SV=1	MGST1	1	1.15614e-09	113.28	VFANPEDCVAFGK(1)GENAK	3	-1.0641	1	1.183	1.127	1.19	0.896	0.899	0.888	0.767	0.000116488
P10644	367	K	cAMP-dependent protein kinase type I-alpha regulatory subunit OS=Homo sapiens OX=9606 GN=PRKAR1A PE=1 SV=1	PRKAR1A	1	6.36671e-05	106.67	VLGPCSDILK(1)R	2	-0.67679	1	1.637	1.64	1.76	0.573	0.538	0.536	0.327	2.0587e-06
P10768	39	K	S-formylglutathione hydrolase OS=Homo sapiens OX=9606 GN=ESD PE=1 SV=2	ESD	1	0.000572398	67.997	FAVYLPPK(1)AETGK	3	-0.20773	1	1.278	1.312	1.336	0.726	0.708	0.952	0.608	0.033801
P10768	278	K	S-formylglutathione hydrolase OS=Homo sapiens OX=9606 GN=ESD PE=1 SV=2	ESD	1	0.0171177	57.281	HHAK(1)YLNA	3	0.71072	1	1.101	0.855	1.045	1.024	1.011	0.989	1.008	0.87958
P10809	359	K	60 kDa heat shock protein, mitochondrial OS=Homo sapiens OX=9606 GN=HSPD1 PE=1 SV=2	HSPD1	1	0.0016584	93.096	DDAMLLK(1)GK	3	0.12683	4	1.049	1.028	1.076	0.954	0.984	0.975	0.924	0.007941
P10809	523	K	60 kDa heat shock protein, mitochondrial OS=Homo sapiens OX=9606 GN=HSPD1 PE=1 SV=2	HSPD1	1	0.0100256	72.321	GIIDPTK(1)VVR	2	0.11256	1	0.936	0.937	1.005	1.059	1.033	1.009	1.077	0.051879
P10809	91	K	60 kDa heat shock protein, mitochondrial OS=Homo sapiens OX=9606 GN=HSPD1 PE=1 SV=2	HSPD1	1	0.0107878	97.798	YK(1)NIGAK	3	-0.6687	2	0.976	0.964	0.978	1.094	1.009	0.975	1.055	0.2686
P10809	236	K	60 kDa heat shock protein, mitochondrial OS=Homo sapiens OX=9606 GN=HSPD1 PE=1 SV=2	HSPD1	1	0.00253494	51.798	GQK(1)CEFQDAYVLLSEK	3	-1.0873	1	0.78	0.877	0.909	1.162	1.054	1.094	1.29	0.0091978
P10809	417	K	60 kDa heat shock protein, mitochondrial OS=Homo sapiens OX=9606 GN=HSPD1 PE=1 SV=2	HSPD1	1	9.78857e-13	133.47	VGGTSDVEVNEK(1)K	2	0.52232	2	0.986	0.917	0.879	1.033	1.06	1.073	1.138	0.021116
P10809	249	K	60 kDa heat shock protein, mitochondrial OS=Homo sapiens OX=9606 GN=HSPD1 PE=1 SV=2	HSPD1	1	0.00108489	62.104	CEFQDAYVLLSEK(1)K	3	-0.35711	1	0.963	1.061	1.033	0.983	0.99	1.002	0.973	0.42058
P10809	191	K	60 kDa heat shock protein, mitochondrial OS=Homo sapiens OX=9606 GN=HSPD1 PE=1 SV=2	HSPD1	1	9.11481e-10	136.33	EIGNIISDAMK(1)K	2	-0.24577	2	1.142	1.101	1.07	0.865	0.914	1.024	0.846	0.033338
P10809	72	K	60 kDa heat shock protein, mitochondrial OS=Homo sapiens OX=9606 GN=HSPD1 PE=1 SV=2	HSPD1	1	0.000399538	64.565	TVIIEQSWGSPK(1)VTK	3	-1.9313	1	0.976	1.003	0.948	1.04	1.007	1.02	1.048	0.067039
P10809	31	K	60 kDa heat shock protein, mitochondrial OS=Homo sapiens OX=9606 GN=HSPD1 PE=1 SV=2	HSPD1	1	0.0318989	61.344	DVK(1)FGADAR	2	1.6746	1	1.028	0.965	1.082	0.985	0.983	1	0.965	0.36356
P10809	364	K	60 kDa heat shock protein, mitochondrial OS=Homo sapiens OX=9606 GN=HSPD1 PE=1 SV=2	HSPD1	0.957194	0.00994021	57.175	GK(0.043)GDK(0.957)AQIEK	3	-0.60917	1	1.226	1.263	1.228	0.876	0.842	0.819	0.683	6.0948e-05
P10809	473	K	60 kDa heat shock protein, mitochondrial OS=Homo sapiens OX=9606 GN=HSPD1 PE=1 SV=2	HSPD1	1	0.000328411	93.348	TLK(1)IPAMTIAK	2	-0.84664	2	0.948	1.024	1.101	1.02	0.972	0.974	0.965	0.5027
P11021	553	K	Endoplasmic reticulum chaperone BiP OS=Homo sapiens OX=9606 GN=HSPA5 PE=1 SV=2	HSPA5	1	0.0198462	68.915	FAEEDK(1)K	3	0.25072	1	0.739	0.758	0.737	1.273	1.094	1.171	1.584	0.00051646
P11021	370	K	Endoplasmic reticulum chaperone BiP OS=Homo sapiens OX=9606 GN=HSPA5 PE=1 SV=2	HSPA5	1	0.00222506	65.224	IPK(1)IQQLVK	3	-0.79092	1
P11021	446	K	Endoplasmic reticulum chaperone BiP OS=Homo sapiens OX=9606 GN=HSPA5 PE=1 SV=2	HSPA5	1	0.00751438	76.679	NTVVPTK(1)K	3	0.5563	2	0.967	0.966	0.947	1.019	1.058	1.021	1.076	0.0064553
P11021	523	K	Endoplasmic reticulum chaperone BiP OS=Homo sapiens OX=9606 GN=HSPA5 PE=1 SV=2	HSPA5	1	0.000404814	92.856	NK(1)ITITNDQNR	3	-1.5481	2	0.774	0.845	0.83	1.207	1.147	1.039	1.385	0.0032357
P11021	326	K	Endoplasmic reticulum chaperone BiP OS=Homo sapiens OX=9606 GN=HSPA5 PE=1 SV=2	HSPA5	1	9.95176e-10	135.02	AK(1)FEELNMDLFR	3	0.4379	2	0.823	0.861	0.774	1.138	1.133	1.113	1.377	0.0005359
P11021	579	K	Endoplasmic reticulum chaperone BiP OS=Homo sapiens OX=9606 GN=HSPA5 PE=1 SV=2	HSPA5	1	0.00179595	120.45	NQIGDK(1)EK	3	-0.39	2	0.819	0.753	0.785	1.147	1.179	1.127	1.465	0.000158524
P11021	268	K	Endoplasmic reticulum chaperone BiP OS=Homo sapiens OX=9606 GN=HSPA5 PE=1 SV=2	HSPA5	1	0.000353452	107.06	VMEHFIK(1)LYK	2	-1.2042	3	0.885	0.86	0.869	1.083	1.115	1.08	1.254	6.3919e-05
P11021	163	K	Endoplasmic reticulum chaperone BiP OS=Homo sapiens OX=9606 GN=HSPA5 PE=1 SV=2	HSPA5	1	0.0101241	58.699	ETAEAYLGK(1)K	3	0.87181	2	0.97	0.869	0.947	1.086	1.034	1.046	1.136	0.024323
P11021	447	K	Endoplasmic reticulum chaperone BiP OS=Homo sapiens OX=9606 GN=HSPA5 PE=1 SV=2	HSPA5	1	1.2647e-09	116.61	K(1)SQIFSTASDNQPTVTIK	3	3.4798	5	1.057	1.048	0.991	0.976	0.985	0.993	0.954	0.088982
P11021	81	K	Endoplasmic reticulum chaperone BiP OS=Homo sapiens OX=9606 GN=HSPA5 PE=1 SV=2	HSPA5	1	1.24608e-13	112.58	LIGDAAK(1)NQLTSNPENTVFDAK	3	-0.58175	1	0.844	0.893	0.808	1.106	1.109	1.108	1.306	0.0115179
P11021	353	K	Endoplasmic reticulum chaperone BiP OS=Homo sapiens OX=9606 GN=HSPA5 PE=1 SV=2	HSPA5	1	0.00129509	66.261	K(1)SDIDEIVLVGGSTR	2	0.251	1	0.824	0.871	0.825	1.08	1.195	1.065	1.325	0.0023015
P11021	352	K	Endoplasmic reticulum chaperone BiP OS=Homo sapiens OX=9606 GN=HSPA5 PE=1 SV=2	HSPA5	1	0.000769989	104.22	VLEDSDLK(1)K	3	2.7364	2	0.731	0.73	0.76	1.123	1.214	1.2	1.593	7.6558e-05
P11021	125	K	Endoplasmic reticulum chaperone BiP OS=Homo sapiens OX=9606 GN=HSPA5 PE=1 SV=2	HSPA5	1	0.00019742	82.663	TK(1)PYIQVDIGGGQTK	3	-0.091695	1	0.928	0.99	0.905	1.042	1.029	1.063	1.11	0.020719
P11021	164	K	Endoplasmic reticulum chaperone BiP OS=Homo sapiens OX=9606 GN=HSPA5 PE=1 SV=2	HSPA5	1	5.11193e-05	83.666	K(1)VTHAVVTVPAYFNDAQR	3	0.86487	1	0.853	0.981	1.032	0.963	1.163	0.975	1.082	0.4015
P11021	573	K	Endoplasmic reticulum chaperone BiP OS=Homo sapiens OX=9606 GN=HSPA5 PE=1 SV=2	HSPA5	1	0.000660366	78.441	NELESYAYSLK(1)NQIGDK	3	2.5426	1	1.029	1.122	1.152	1.005	0.903	0.906	0.852	0.030661
P11021	96	K	Endoplasmic reticulum chaperone BiP OS=Homo sapiens OX=9606 GN=HSPA5 PE=1 SV=2	HSPA5	1	2.75196e-52	206.8	NQLTSNPENTVFDAK(1)R	2	0.056064	2	0.865	0.81	0.869	1.072	1.129	1.122	1.306	0.00066445
P11021	113	K	Endoplasmic reticulum chaperone BiP OS=Homo sapiens OX=9606 GN=HSPA5 PE=1 SV=2	HSPA5	1	0.000115662	80.738	TWNDPSVQQDIK(1)FLPFK	3	0.39712	1	0.847	0.975	0.944	1.046	1.074	1.051	1.146	0.033116
P11142	524	K	Heat shock cognate 71 kDa protein OS=Homo sapiens OX=9606 GN=HSPA8 PE=1 SV=1	HSPA8	1	0.00135433	108.7	MVQEAEK(1)YK	3	-1.2955	3	0.879	0.755	0.873	1.191	1.074	1.09	1.338	0.0077786
P11142	71	K	Heat shock cognate 71 kDa protein OS=Homo sapiens OX=9606 GN=HSPA8 PE=1 SV=1	HSPA8	1	7.59944e-18	144.3	NQVAMNPTNTVFDAK(1)R	3	-1.5032	5	0.857	0.877	0.84	1.105	1.072	1.127	1.284	0.00020002
P11142	328	K	Heat shock cognate 71 kDa protein OS=Homo sapiens OX=9606 GN=HSPA8 PE=1 SV=1	HSPA8	1	3.15071e-13	124.2	LDK(1)SQIHDIVLVGGSTR	2	0.070996	2	1.051	1.084	1.083	0.994	0.955	0.923	0.892	0.0085591
P11142	102	K	Heat shock cognate 71 kDa protein OS=Homo sapiens OX=9606 GN=HSPA8 PE=1 SV=1	HSPA8	1	0.000222315	132.01	PK(1)VQVEYK	2	0.052475	1	1.011	1.087	0.825	1.097	0.858	1.119	1.052	0.69568
P11142	526	K	Heat shock cognate 71 kDa protein OS=Homo sapiens OX=9606 GN=HSPA8 PE=1 SV=1	HSPA8	1	0.0134031	93.649	YK(1)AEDEK	3	0.19792	2	1.012	0.972	0.893	1.047	1.026	1.031	1.079	0.107538
P11142	500	K	Heat shock cognate 71 kDa protein OS=Homo sapiens OX=9606 GN=HSPA8 PE=1 SV=1	HSPA8	1	1.78082e-05	128.54	ENK(1)ITITNDK	2	-1.3567	1	0.885	0.894	0.807	1.17	1.001	1.13	1.276	0.0133569
P11142	126	K	Heat shock cognate 71 kDa protein OS=Homo sapiens OX=9606 GN=HSPA8 PE=1 SV=1	HSPA8	1	6.10442e-09	114.64	SFYPEEVSSMVLTK(1)MK	3	-3.5614	1	0.921	0.914	0.953	1.061	1.022	1.077	1.133	0.0034445
P11142	246	K	Heat shock cognate 71 kDa protein OS=Homo sapiens OX=9606 GN=HSPA8 PE=1 SV=1	HSPA8	1	0.000166294	98.105	MVNHFIAEFK(1)R	3	-0.91915	6	0.91	0.894	1.009	1.04	1.092	1.012	1.118	0.06256
P11142	108	K	Heat shock cognate 71 kDa protein OS=Homo sapiens OX=9606 GN=HSPA8 PE=1 SV=1	HSPA8	1	0.000309723	102.87	VQVEYK(1)GETK	2	-0.9608	3	0.944	0.953	1.006	1.042	0.971	1.068	1.061	0.164116
P11142	451	K	Heat shock cognate 71 kDa protein OS=Homo sapiens OX=9606 GN=HSPA8 PE=1 SV=1	HSPA8	1	0.000702295	57.175	AMTK(1)DNNLLGK	3	0.6553	1
P11142	531	K	Heat shock cognate 71 kDa protein OS=Homo sapiens OX=9606 GN=HSPA8 PE=1 SV=1	HSPA8	0.999998	0.00414635	73.499	YKAEDEK(1)QR	3	-0.43131	1	0.911	0.909	0.916	1.043	1.053	1.097	1.167	0.01014
P11142	112	K	Heat shock cognate 71 kDa protein OS=Homo sapiens OX=9606 GN=HSPA8 PE=1 SV=1	HSPA8	1	3.24356e-05	85.203	GETK(1)SFYPEEVSSMVLTK	3	-0.58856	3	0.969	0.982	0.912	1.02	1.006	1.082	1.086	0.061616
P11142	56	K	Heat shock cognate 71 kDa protein OS=Homo sapiens OX=9606 GN=HSPA8 PE=1 SV=1	HSPA8	1	3.02418e-52	176.67	LIGDAAK(1)NQVAMNPTNTVFDAK	3	-0.89536	2	1.137	0.99	1.006	0.99	0.964	0.98	0.936	0.22444
P11142	357	K	Heat shock cognate 71 kDa protein OS=Homo sapiens OX=9606 GN=HSPA8 PE=1 SV=1	HSPA8	1	0.00119831	62.287	LLQDFFNGK(1)ELNK	3	0.4748	1	0.966	1.083	0.994	0.975	1.067	0.945	0.982	0.72736
P11142	507	K	Heat shock cognate 71 kDa protein OS=Homo sapiens OX=9606 GN=HSPA8 PE=1 SV=1	HSPA8	1	2.06296e-08	152.27	ITITNDK(1)GR	2	-0.26924	2	0.952	0.933	0.927	1.093	1.046	1.01	1.12	0.0096191
P11142	187	K	Heat shock cognate 71 kDa protein OS=Homo sapiens OX=9606 GN=HSPA8 PE=1 SV=1	HSPA8	1	1.10512e-19	141.13	IINEPTAAAIAYGLDK(1)K	3	0.063909	1	0.959	0.939	0.93	1.069	1.083	0.987	1.11	0.027096
P11172	314	K	Uridine 5'-monophosphate synthase OS=Homo sapiens OX=9606 GN=UMPS PE=1 SV=1	UMPS	1	0.000819799	82.489	K(1)FADIGNTVK	3	1.6372	2	0.43	0.446	0.433	1.439	1.332	1.387	3.176	6.5206e-07
P11172	323	K	Uridine 5'-monophosphate synthase OS=Homo sapiens OX=9606 GN=UMPS PE=1 SV=1	UMPS	1	0.000311669	101.89	FADIGNTVK(1)K	3	-0.13023	2	1.009	1.063	0.944	0.974	1.011	1.019	0.996	0.93934
P11177	354	K	Pyruvate dehydrogenase E1 component subunit beta, mitochondrial OS=Homo sapiens OX=9606 GN=PDHB PE=1 SV=3	PDHB	1	0.00265664	97.431	DIIFAIK(1)K	2	-0.98846	2	1.48	1.43	1.478	0.7	0.665	0.717	0.474	3.69e-06
P11177	227	K	Pyruvate dehydrogenase E1 component subunit beta, mitochondrial OS=Homo sapiens OX=9606 GN=PDHB PE=1 SV=3	PDHB	1	0.00729726	59.067	DFLIPIGK(1)AK	2	1.655	2	1.281	1.297	1.297	0.875	0.709	0.845	0.627	0.0186232
P11177	184	K	Pyruvate dehydrogenase E1 component subunit beta, mitochondrial OS=Homo sapiens OX=9606 GN=PDHB PE=1 SV=3	PDHB	1	0.000401491	64.52	VVSPWNSEDAK(1)GLIK	3	-1.0332	1	0.877	0.918	1.01	1.008	1.033	1.102	1.12	0.080662
P11216	811	K	Glycogen phosphorylase, brain form OS=Homo sapiens OX=9606 GN=PYGB PE=1 SV=5	PYGB	1	0.000841189	72.681	NIACSGK(1)FSSDR	3	-0.31252	2	1.181	1.197	1.211	0.939	0.852	0.834	0.731	0.00107925
P11216	479	K	Glycogen phosphorylase, brain form OS=Homo sapiens OX=9606 GN=PYGB PE=1 SV=5	PYGB	1	5.06983e-05	95.417	DFYELEPEK(1)FQNK	3	-0.66839	3	1.164	1.212	1.186	0.874	0.863	0.901	0.741	6.2425e-05
P11216	371	K	Glycogen phosphorylase, brain form OS=Homo sapiens OX=9606 GN=PYGB PE=1 SV=5	PYGB	1	4.72381e-34	163.25	K(1)TCAYTNHTVLPEALER	3	0.21765	2	1.163	1.137	1.223	0.834	0.913	0.915	0.756	0.0016812
P11216	370	K	Glycogen phosphorylase, brain form OS=Homo sapiens OX=9606 GN=PYGB PE=1 SV=5	PYGB	1	0.00904633	101.43	AWEITK(1)K	3	-0.31142	2	1.604	1.571	1.509	0.623	0.662	0.6	0.402	1.56336e-05
P11216	248	K	Glycogen phosphorylase, brain form OS=Homo sapiens OX=9606 GN=PYGB PE=1 SV=5	PYGB	1	0.00533475	57.164	LWSAK(1)APNDFK	3	0.11522	1	0.941	1.096	1.234	1.025	0.889	0.919	0.866	0.193902
P11216	597	K	Glycogen phosphorylase, brain form OS=Homo sapiens OX=9606 GN=PYGB PE=1 SV=5	PYGB	1	0.0418918	56.202	DPAK(1)AFVPR	2	-0.22179	1	1.102	0.983	0.999	0.993	0.955	1.016	0.961	0.38802
P11216	552	K	Glycogen phosphorylase, brain form OS=Homo sapiens OX=9606 GN=PYGB PE=1 SV=5	PYGB	1	0.000848405	90.614	FSAFLEK(1)EYK	2	-1.6149	2	0.99	0.968	1.018	1.099	0.968	0.973	1.022	0.67656
P11216	569	K	Glycogen phosphorylase, brain form OS=Homo sapiens OX=9606 GN=PYGB PE=1 SV=5	PYGB	1	0.000314566	83.692	INPSSMFDVHVK(1)R	3	-0.15181	1	1.063	1.099	1.093	0.95	0.984	0.913	0.875	0.0049801
P11216	316	K	Glycogen phosphorylase, brain form OS=Homo sapiens OX=9606 GN=PYGB PE=1 SV=5	PYGB	1	0.0361689	62.107	SSK(1)FGCR	2	-3.135	1
P11216	438	K	Glycogen phosphorylase, brain form OS=Homo sapiens OX=9606 GN=PYGB PE=1 SV=5	PYGB	1	3.34092e-05	113.61	MSVIEEGDCK(1)R	2	-0.63886	2	1.117	1.111	1.125	0.897	0.974	0.908	0.829	0.0184006
P11216	545	K	Glycogen phosphorylase, brain form OS=Homo sapiens OX=9606 GN=PYGB PE=1 SV=5	PYGB	1	0.00142168	100.93	LK(1)FSAFLEK	3	-0.19316	2	1.201	1.123	1.072	0.841	0.977	0.932	0.81	0.0184822
P11216	483	K	Glycogen phosphorylase, brain form OS=Homo sapiens OX=9606 GN=PYGB PE=1 SV=5	PYGB	1	0.000156753	117.93	FQNK(1)TNGITPR	2	2.154	3	1.095	1.168	1.009	0.897	0.958	0.977	0.866	0.044603
P11216	364	K	Glycogen phosphorylase, brain form OS=Homo sapiens OX=9606 GN=PYGB PE=1 SV=5	PYGB	1	4.38398e-05	94.09	VDWDK(1)AWEITK	3	-1.2638	2	1.109	1.119	1.174	0.9	0.925	0.919	0.807	0.00038404
P11216	290	K	Glycogen phosphorylase, brain form OS=Homo sapiens OX=9606 GN=PYGB PE=1 SV=5	PYGB	1	0.000720037	57.148	VLYPNDNFFEGK(1)ELR	3	0.8451	1	1.045	1.101	1.112	0.989	0.94	0.917	0.874	0.0100446
P11234	120	K	Ras-related protein Ral-B OS=Homo sapiens OX=9606 GN=RALB PE=1 SV=1	RALB	1	0.00659251	49.298	AEEDK(1)IPLLVVGNK	3	1.5137	1	0.849	0.922	0.908	1.061	1.254	0.92	1.208	0.123243
P11279	337	K	Lysosome-associated membrane glycoprotein 1 OS=Homo sapiens OX=9606 GN=LAMP1 PE=1 SV=3	LAMP1	1	2.05414e-38	159.4	ALQATVGNSYK(1)CNAEEHVR	3	-0.42712	2	0.642	1.022	1.94	0.801	0.994	0.787	0.716	0.51272
P11387	252	K	DNA topoisomerase 1 OS=Homo sapiens OX=9606 GN=TOP1 PE=1 SV=2	TOP1	1	0.00441055	51.771	LSPK(1)AEEVATFFAK	3	-3.501	1	0.684	0.692	0.831	1.198	1.332	1.025	1.611	0.0086001
P11387	549	K	DNA topoisomerase 1 OS=Homo sapiens OX=9606 GN=TOP1 PE=1 SV=2	TOP1	1	0.00443193	55.261	VFK(1)NLQLFMENK	3	0.11891	1	0.837	0.918	0.907	1.133	1.074	1.039	1.219	0.0066756
P11387	443	K	DNA topoisomerase 1 OS=Homo sapiens OX=9606 GN=TOP1 PE=1 SV=2	TOP1	1	0.00277252	88.596	DWQK(1)YETAR	2	-1.473	1	1.084	1.014	1.01	0.957	1.049	0.941	0.948	0.25778
P11387	400	K	DNA topoisomerase 1 OS=Homo sapiens OX=9606 GN=TOP1 PE=1 SV=2	TOP1	1	0.000600771	81.017	VPSPPPGHK(1)WK	3	0.47903	1
P11387	347	K	DNA topoisomerase 1 OS=Homo sapiens OX=9606 GN=TOP1 PE=1 SV=2	TOP1	1	0.000412977	74.475	EYGFCIMDNHK(1)ER	3	0.091706	1	0.979	0.888	1.034	0.907	1.217	0.957	1.062	0.6217
P11387	218	K	DNA topoisomerase 1 OS=Homo sapiens OX=9606 GN=TOP1 PE=1 SV=2	TOP1	1	0.00578621	85.212	WK(1)FLEHK	3	-0.5485	1	0.654	0.728	0.858	1.154	1.144	1.224	1.572	0.0049752
P11387	734	K	DNA topoisomerase 1 OS=Homo sapiens OX=9606 GN=TOP1 PE=1 SV=2	TOP1	1	0.0194936	78.113	ITVAWCK(1)K	2	-1.069	1	0.952	0.866	0.809	1.06	1.123	1.089	1.246	0.0114613
P11387	172	K	DNA topoisomerase 1 OS=Homo sapiens OX=9606 GN=TOP1 PE=1 SV=2	TOP1	1	0.000370636	88.075	KLEEEEDGK(1)LK	3	-0.040632	1	1.03	0.961	0.958	0.966	1.069	1.016	1.035	0.42078
P11387	735	K	DNA topoisomerase 1 OS=Homo sapiens OX=9606 GN=TOP1 PE=1 SV=2	TOP1	1	0.0227152	76.228	K(1)WGVPIEK	2	1.4251	1	1.446	1.386	1.359	0.691	0.811	0.714	0.529	0.00025724
P11388	418	K	DNA topoisomerase 2-alpha OS=Homo sapiens OX=9606 GN=TOP2A PE=1 SV=3	TOP2A	1	0.00450274	56.916	FK(1)AQVQLNK	3	2.143	1
P11388	987	K	DNA topoisomerase 2-alpha OS=Homo sapiens OX=9606 GN=TOP2A PE=1 SV=3	TOP2A	1	0.0113389	65.252	VGLHK(1)VFK	3	0.054686	1	0.931	0.945	0.984	0.903	1.179	1.02	1.085	0.39222
P11413	95	K	Glucose-6-phosphate 1-dehydrogenase OS=Homo sapiens OX=9606 GN=G6PD PE=1 SV=4	G6PD	1	0.0164683	79.489	ATPEEK(1)LK	3	-1.6644	2	0.917	0.92	0.858	1.06	1.098	1.066	1.196	0.0020572
P11413	497	K	Glucose-6-phosphate 1-dehydrogenase OS=Homo sapiens OX=9606 GN=G6PD PE=1 SV=4	G6PD	1	0.00199356	83.137	GPTEADELMK(1)R	2	-1.2596	1	0.95	0.953	1.055	1.027	0.904	1.111	1.028	0.73012
P11413	97	K	Glucose-6-phosphate 1-dehydrogenase OS=Homo sapiens OX=9606 GN=G6PD PE=1 SV=4	G6PD	1	0.0042847	82.489	LK(1)LEDFFAR	2	0.58294	1	0.988	1.061	0.949	1.03	0.977	1.012	1.007	0.83944
P11413	386	K	Glucose-6-phosphate 1-dehydrogenase OS=Homo sapiens OX=9606 GN=G6PD PE=1 SV=4	G6PD	1	1.83714e-26	152.11	LQFHDVAGDIFHQQCK(1)R	3	-0.84319	2	0.878	0.927	0.958	1.01	1.086	1.076	1.148	0.0155226
P11413	288	K	Glucose-6-phosphate 1-dehydrogenase OS=Homo sapiens OX=9606 GN=G6PD PE=1 SV=4	G6PD	1	6.72931e-05	91.355	PASTNSDDVRDEK(1)VK	3	0.016093	1	0.913	1.107	0.813	1.019	0.929	1.174	1.102	0.42282
P11413	171	K	Glucose-6-phosphate 1-dehydrogenase OS=Homo sapiens OX=9606 GN=G6PD PE=1 SV=4	G6PD	1	0.0180182	68.657	IIVEK(1)PFGR	2	1.4483	1	0.886	0.741	0.896	1.08	1.133	1.127	1.324	0.0109778
P11413	82	K	Glucose-6-phosphate 1-dehydrogenase OS=Homo sapiens OX=9606 GN=G6PD PE=1 SV=4	G6PD	1	0.0227152	76.228	K(1)QSEPFFK	2	-0.17929	1	1.024	0.939	0.975	1.051	1.009	1.004	1.043	0.21708
P11586	21	K	C-1-tetrahydrofolate synthase, cytoplasmic OS=Homo sapiens OX=9606 GN=MTHFD1 PE=1 SV=3	MTHFD1	1	0.0181478	68.536	LK(1)NQVTQLK	2	-0.79325	1	0.932	0.936	0.739	1.177	1.053	1.061	1.262	0.050582
P11586	71	K	C-1-tetrahydrofolate synthase, cytoplasmic OS=Homo sapiens OX=9606 GN=MTHFD1 PE=1 SV=3	MTHFD1	1	0.00187991	91.783	ATHIK(1)LPR	3	-0.16813	1	1.118	1.057	0.882	0.981	1.001	1	0.975	0.8081
P11586	825	K	C-1-tetrahydrofolate synthase, cytoplasmic OS=Homo sapiens OX=9606 GN=MTHFD1 PE=1 SV=3	MTHFD1	1	0.0426285	65.474	LPVEDK(1)IR	2	0.60258	1	1.018	0.989	0.91	1.019	1.009	1.046	1.054	0.20462
P11586	739	K	C-1-tetrahydrofolate synthase, cytoplasmic OS=Homo sapiens OX=9606 GN=MTHFD1 PE=1 SV=3	MTHFD1	1	0.01854	89.355	GFSNLK(1)K	2	0.3705	1	0.874	0.962	1.133	0.926	1.02	1.08	1.019	0.80842
P11586	364	K	C-1-tetrahydrofolate synthase, cytoplasmic OS=Homo sapiens OX=9606 GN=MTHFD1 PE=1 SV=3	MTHFD1	1	0.00143986	100.02	LK(1)HRPDGK	4	0.81669	1	1.097	0.92	0.964	0.96	0.999	1.074	1.017	0.77454
P11586	150	K	C-1-tetrahydrofolate synthase, cytoplasmic OS=Homo sapiens OX=9606 GN=MTHFD1 PE=1 SV=3	MTHFD1	1	5.00971e-08	101.17	GDLNDCFIPCTPK(1)GCLELIK	3	-1.4535	1	1.437	1.458	1.372	0.748	0.746	0.674	0.508	6.1755e-05
P11586	297	K	C-1-tetrahydrofolate synthase, cytoplasmic OS=Homo sapiens OX=9606 GN=MTHFD1 PE=1 SV=3	MTHFD1	0.990603	0.00431591	57.785	FLEK(0.991)FK(0.009)PGK	3	-0.47167	1
P11717	1285	K	Cation-independent mannose-6-phosphate receptor OS=Homo sapiens OX=9606 GN=IGF2R PE=1 SV=3	IGF2R	1	0.0187544	68.657	VVSSCQEK(1)R	2	-1.3987	1	1.571	1.542	1.451	0.618	0.683	0.664	0.431	2.2521e-05
P11766	107	K	Alcohol dehydrogenase class-3 OS=Homo sapiens OX=9606 GN=ADH5 PE=1 SV=4	ADH5	1	1.45045e-06	115.57	FCLNPK(1)TNLCQK	2	0.14803	1	2	1.774	1.804	0.398	0.407	0.482	0.231	3.6245e-05
P11908	194	K	Ribose-phosphate pyrophosphokinase 2 OS=Homo sapiens OX=9606 GN=PRPS2 PE=1 SV=2	PRPS2	1	0.00111083	68.044	LNVEFALIHK(1)ER	3	0.42256	1
P11940	104	K	Polyadenylate-binding protein 1 OS=Homo sapiens OX=9606 GN=PABPC1 PE=1 SV=2	PABPC1	1	0.000498221	70.373	SGVGNIFIK(1)NLDK	3	-0.3679	1	1.18	0.988	1.097	0.892	0.969	0.979	0.87	0.081203
P11940	512	K	Polyadenylate-binding protein 1 OS=Homo sapiens OX=9606 GN=PABPC1 PE=1 SV=2	PABPC1	1	0.000981892	93.345	TVPQYK(1)YAAGVR	2	-0.53509	2	0.877	0.795	0.881	1.121	1.146	1.054	1.301	0.0032433
P11940	95	K	Polyadenylate-binding protein 1 OS=Homo sapiens OX=9606 GN=PABPC1 PE=1 SV=2	PABPC1	1	0.0362645	43.897	K(1)SGVGNIFIK	3	-0.0032435	1	1.074	1.073	1.037	1.06	0.914	0.927	0.911	0.121724
P11940	229	K	Polyadenylate-binding protein 1 OS=Homo sapiens OX=9606 GN=PABPC1 PE=1 SV=2	PABPC1	1	0.000102805	117.79	VMTDESGK(1)SK	2	-0.65745	1	0.937	0.864	0.921	1.087	1.044	1.076	1.178	0.0039232
P11940	213	K	Polyadenylate-binding protein 1 OS=Homo sapiens OX=9606 GN=PABPC1 PE=1 SV=2	PABPC1	1	4.77726e-10	121.99	DLFGK(1)FGPALSVK	2	0.83847	2	0.866	0.954	0.901	1.106	1.021	1.08	1.179	0.0110169
P11940	78	K	Polyadenylate-binding protein 1 OS=Homo sapiens OX=9606 GN=PABPC1 PE=1 SV=2	PABPC1	1	0.00143186	72.891	ALDTMNFDVIK(1)GK	2	-0.31335	2	0.87	0.936	0.971	1.068	1.157	0.945	1.142	0.124938
P11940	606	K	Polyadenylate-binding protein 1 OS=Homo sapiens OX=9606 GN=PABPC1 PE=1 SV=2	PABPC1	1	0.000111767	83.54	SK(1)VDEAVAVLQAHQAK	4	-0.18633	1	1.127	1.251	0.836	1.029	0.85	0.999	0.895	0.49968
P12004	13	K	Proliferating cell nuclear antigen OS=Homo sapiens OX=9606 GN=PCNA PE=1 SV=1	PCNA	1	0.000699548	92.611	LVQGSILK(1)K	2	-0.50582	2	1.038	1.051	1.119	0.899	0.915	1.055	0.894	0.110842
P12004	14	K	Proliferating cell nuclear antigen OS=Homo sapiens OX=9606 GN=PCNA PE=1 SV=1	PCNA	1	0.0440928	74.464	K(1)VLEALK	2	0.1064	1	1.118	1.015	1.097	0.98	0.978	0.91	0.888	0.036399
P12081	403	K	Histidine--tRNA ligase, cytoplasmic OS=Homo sapiens OX=9606 GN=HARS PE=1 SV=2	HARS	1	0.0016584	93.096	LEALEEK(1)IR	2	0.9904	1	0.979	0.915	0.766	1.126	1.124	1.008	1.225	0.064895
P12081	243	K	Histidine--tRNA ligase, cytoplasmic OS=Homo sapiens OX=9606 GN=HARS PE=1 SV=2	HARS	1	4.77131e-05	120.87	LDK(1)VSWEEVK	2	-2.3898	1	1.146	1.24	1.237	0.869	0.822	0.904	0.716	0.0009049
P12081	499	K	Histidine--tRNA ligase, cytoplasmic OS=Homo sapiens OX=9606 GN=HARS PE=1 SV=2	HARS	1	0.00928353	58.476	REDLVEEIK(1)R	3	0.6142	1	0.87	0.945	0.902	1.046	1.067	1.093	1.18	0.0036026
P12235	163	K	ADP/ATP translocase 1 OS=Homo sapiens OX=9606 GN=SLC25A4 PE=1 SV=4	SLC25A4	1	0.000110669	89.231	EFHGLGDCIIK(1)IFK	3	2.9573	1	1.007	0.959	0.939	1.041	0.994	1.048	1.061	0.08812
P12235	166	K	ADP/ATP translocase 1 OS=Homo sapiens OX=9606 GN=SLC25A4 PE=1 SV=4	SLC25A4	1	0.0156531	79.986	IFK(1)SDGLR	2	-0.84505	1	1.032	0.972	0.93	0.986	1.016	1.06	1.044	0.30518
P12235	272	K	ADP/ATP translocase 1 OS=Homo sapiens OX=9606 GN=SLC25A4 PE=1 SV=4	SLC25A4	1	2.61842e-07	123.28	AFFK(1)GAWSNVLR	3	-0.72811	2	0.879	0.94	0.893	1.097	1.081	1.034	1.184	0.003279
P12236	147	K	ADP/ATP translocase 3 OS=Homo sapiens OX=9606 GN=SLC25A6 PE=1 SV=4	SLC25A6	1	0.000989496	86.729	LAADVGK(1)SGTER	3	-0.67444	2	0.921	1.021	1.033	1.012	1.019	1	1.019	0.64298
P12236	272	K	ADP/ATP translocase 3 OS=Homo sapiens OX=9606 GN=SLC25A6 PE=1 SV=4	SLC25A6	1	2.61842e-07	123.28	AFFK(1)GAWSNVLR	3	-0.72811	2	0.879	0.94	0.893	1.097	1.081	1.034	1.184	0.003279
P12236	63	K	ADP/ATP translocase 3 OS=Homo sapiens OX=9606 GN=SLC25A6 PE=1 SV=4	SLC25A6	1	0.00207157	78.541	IPK(1)EQGVLSFWR	2	-1.1123	1	1.055	0.871	1.023	1.066	0.956	1.034	1.036	0.60398
P12236	268	K	ADP/ATP translocase 3 OS=Homo sapiens OX=9606 GN=SLC25A6 PE=1 SV=4	SLC25A6	1	0.00241245	90.05	DEGGK(1)AFFK	2	-1.8451	1	0.996	0.944	0.854	1.038	1.019	1.101	1.13	0.071084
P12236	92	K	ADP/ATP translocase 3 OS=Homo sapiens OX=9606 GN=SLC25A6 PE=1 SV=4	SLC25A6	1	2.11826e-18	154.65	YFPTQALNFAFK(1)DK	2	0.23271	2	1.066	1.045	1.001	0.994	0.999	0.951	0.946	0.084623
P12236	163	K	ADP/ATP translocase 3 OS=Homo sapiens OX=9606 GN=SLC25A6 PE=1 SV=4	SLC25A6	1	0.00114157	88.021	GLGDCLVK(1)ITK	2	-0.44357	2	0.97	1.014	0.995	1.038	0.976	1.019	1.018	0.46986
P12236	23	K	ADP/ATP translocase 3 OS=Homo sapiens OX=9606 GN=SLC25A6 PE=1 SV=4	SLC25A6	1	1.34566e-30	153.36	DFLAGGIAAAISK(1)TAVAPIER	3	-1.0917	3	1.19	1.099	1.146	0.823	0.949	0.95	0.792	0.0114237
P12236	105	K	ADP/ATP translocase 3 OS=Homo sapiens OX=9606 GN=SLC25A6 PE=1 SV=4	SLC25A6	1	1.05873e-17	143.46	QIFLGGVDK(1)HTQFWR	3	-0.36193	1	0.906	0.834	0.852	1.186	1.124	0.992	1.274	0.0147823
P12236	96	K	ADP/ATP translocase 3 OS=Homo sapiens OX=9606 GN=SLC25A6 PE=1 SV=4	SLC25A6	1	3.40253e-08	141.58	YK(1)QIFLGGVDK	2	-0.93563	3	1.013	0.923	0.899	1.048	1.044	1.041	1.105	0.10788
P12268	124	K	Inosine-5'-monophosphate dehydrogenase 2 OS=Homo sapiens OX=9606 GN=IMPDH2 PE=1 SV=2	IMPDH2	1	5.40705e-05	80.236	KYEQGFITDPVVLSPK(1)DR	3	-0.20375	1	0.966	1.034	0.942	1.051	1.017	0.991	1.04	0.29268
P12268	109	K	Inosine-5'-monophosphate dehydrogenase 2 OS=Homo sapiens OX=9606 GN=IMPDH2 PE=1 SV=2	IMPDH2	1	1.06126e-17	139.49	K(1)YEQGFITDPVVLSPK	4	0.70687	2	0.965	0.954	0.997	0.983	1.03	1.057	1.053	0.110081
P12268	436	K	Inosine-5'-monophosphate dehydrogenase 2 OS=Homo sapiens OX=9606 GN=IMPDH2 PE=1 SV=2	IMPDH2	1	0.00394479	83.862	YFSEADK(1)IK	2	0.2796	1	0.906	0.995	1.049	0.982	1.017	1.046	1.032	0.51554
P12268	134	K	Inosine-5'-monophosphate dehydrogenase 2 OS=Homo sapiens OX=9606 GN=IMPDH2 PE=1 SV=2	IMPDH2	1	0.00769784	90.919	DVFEAK(1)AR	2	-0.67741	1	1.133	1.061	0.935	0.989	0.943	1.005	0.939	0.36658
P12268	257	K	Inosine-5'-monophosphate dehydrogenase 2 OS=Homo sapiens OX=9606 GN=IMPDH2 PE=1 SV=2	IMPDH2	1	7.81411e-14	124.68	QLLCGAAIGTHEDDK(1)YR	3	-0.41629	1	1.335	1.358	1.282	0.774	0.799	0.789	0.594	1.57662e-05
P12268	293	K	Inosine-5'-monophosphate dehydrogenase 2 OS=Homo sapiens OX=9606 GN=IMPDH2 PE=1 SV=2	IMPDH2	1	7.58522e-22	141.83	DK(1)YPNLQVIGGNVVTAAQAK	4	1.4437	4	1.146	1.161	1.196	0.881	0.904	0.893	0.764	5.6209e-05
P12268	242	K	Inosine-5'-monophosphate dehydrogenase 2 OS=Homo sapiens OX=9606 GN=IMPDH2 PE=1 SV=2	IMPDH2	1	7.99619e-10	116.13	K(1)QLLCGAAIGTHEDDKYR	4	-0.11491	2	1.559	1.417	1.411	0.705	0.718	0.668	0.477	4.2938e-05
P12270	713	K	Nucleoprotein TPR OS=Homo sapiens OX=9606 GN=TPR PE=1 SV=3	TPR	1	3.21182e-08	107.82	SQNTK(1)ISTQLDFASK	3	0.35468	1	1.127	1.119	1.006	0.953	0.913	0.982	0.876	0.035899
P12270	1561	K	Nucleoprotein TPR OS=Homo sapiens OX=9606 GN=TPR PE=1 SV=3	TPR	1	0.02093	53.968	AIVAAK(1)SK	3	0.53303	1
P12270	852	K	Nucleoprotein TPR OS=Homo sapiens OX=9606 GN=TPR PE=1 SV=3	TPR	1	0.0165081	52.49	LEHEISHLK(1)K	4	-0.46556	1	1.15	1.191	1.021	0.903	0.984	0.888	0.825	0.02776
P12277	304	K	Creatine kinase B-type OS=Homo sapiens OX=9606 GN=CKB PE=1 SV=1	CKB	1	0.00258749	76.282	LPNLGK(1)HEK	3	0.57265	1	1.108	0.983	1.008	0.868	1.117	0.965	0.952	0.54966
P12532	416	K	Creatine kinase U-type, mitochondrial OS=Homo sapiens OX=9606 GN=CKMT1A PE=1 SV=1	CKMT1A	1	0.000266463	97.734	IPTPVIHTK(1)H	2	1.2235	1	0.952	1.054	0.964	0.96	1.095	0.981	1.022	0.70166
P12814	95	K	Alpha-actinin-1 OS=Homo sapiens OX=9606 GN=ACTN1 PE=1 SV=2	ACTN1	1	2.23342e-05	94.487	ISNVNK(1)ALDFIASK	3	1.3517	1	0.929	0.95	0.927	1.04	1.064	1.042	1.121	0.00043794
P12814	492	K	Alpha-actinin-1 OS=Homo sapiens OX=9606 GN=ACTN1 PE=1 SV=2	ACTN1	1	0.000252554	83.37	ICDQWDNLGALTQK(1)R	3	-0.70393	1	0.892	0.914	0.829	1.086	1.084	1.096	1.239	0.0182594
P12830	173	K	Cadherin-1 OS=Homo sapiens OX=9606 GN=CDH1 PE=1 SV=3	CDH1	1	0.0295991	41.164	GPFPK(1)NLVQIK	3	-1.3664	1	1.138	1.161	1.119	0.9	0.923	0.913	0.8	6.331e-05
P12931	203	K	Proto-oncogene tyrosine-protein kinase Src OS=Homo sapiens OX=9606 GN=SRC PE=1 SV=3	SRC	1	0.00700052	73.26	GLNVK(1)HYK	3	0.27287	1	1.033	1.094	1.119	0.961	0.922	0.966	0.878	0.0096836
P12956	468	K	X-ray repair cross-complementing protein 6 OS=Homo sapiens OX=9606 GN=XRCC6 PE=1 SV=2	XRCC6	1	0.00870199	101.41	AIVEK(1)LR	2	1.0052	1	0.895	0.951	0.809	1.064	1.119	1.067	1.224	0.0149796
P12956	207	K	X-ray repair cross-complementing protein 6 OS=Homo sapiens OX=9606 GN=XRCC6 PE=1 SV=2	XRCC6	1	4.32357e-10	141.34	K(1)PGGFDISLFYR	2	-0.34999	1	1.034	1.01	1.032	0.975	1.074	0.919	0.965	0.45824
P12956	206	K	X-ray repair cross-complementing protein 6 OS=Homo sapiens OX=9606 GN=XRCC6 PE=1 SV=2	XRCC6	1	1.63967e-10	122.39	DTGIFLDLMHLK(1)K	3	-0.80696	2	1.021	0.992	0.944	1.015	1.027	1.008	1.031	0.25234
P12956	331	K	X-ray repair cross-complementing protein 6 OS=Homo sapiens OX=9606 GN=XRCC6 PE=1 SV=2	XRCC6	0.995562	0.0014281	56.774	QIILEK(0.996)EETEELK(0.004)R	3	-3.3288	1	0.877	0.843	0.916	1.033	1.177	1.05	1.237	0.011285
P12956	591	K	X-ray repair cross-complementing protein 6 OS=Homo sapiens OX=9606 GN=XRCC6 PE=1 SV=2	XRCC6	1	0.0039431	83.869	AYGLK(1)SGLK	3	-1.3608	4	1.307	1.277	1.403	0.773	0.78	0.797	0.589	5.951e-05
P12956	596	K	X-ray repair cross-complementing protein 6 OS=Homo sapiens OX=9606 GN=XRCC6 PE=1 SV=2	XRCC6	1	9.28199e-05	101.53	K(1)QELLEALTK	3	-1.5035	2	1.096	1.061	1.099	0.935	0.978	0.933	0.874	0.0021192
P12956	317	K	X-ray repair cross-complementing protein 6 OS=Homo sapiens OX=9606 GN=XRCC6 PE=1 SV=2	XRCC6	1	0.00303003	54.103	TFNTSTGGLLLPSDTK(1)R	2	-3.0926	2	0.782	0.692	1.141	1.031	1.13	1.107	1.25	0.183942
P12956	544	K	X-ray repair cross-complementing protein 6 OS=Homo sapiens OX=9606 GN=XRCC6 PE=1 SV=2	XRCC6	1	0.000871556	81.676	K(1)HDNEGSGSK	3	0.19167	1	0.833	0.851	0.864	1.18	1.141	1.006	1.306	0.0059965
P12956	357	K	X-ray repair cross-complementing protein 6 OS=Homo sapiens OX=9606 GN=XRCC6 PE=1 SV=2	XRCC6	1	0.00491552	94.407	PLVLLK(1)K	2	-1.1711	1
P12956	297	K	X-ray repair cross-complementing protein 6 OS=Homo sapiens OX=9606 GN=XRCC6 PE=1 SV=2	XRCC6	1	0.0244444	65.179	ETNEPVK(1)TK	2	-2.0679	1	0.955	0.998	0.865	1.106	0.969	1.068	1.115	0.131958
P13010	274	K	X-ray repair cross-complementing protein 5 OS=Homo sapiens OX=9606 GN=XRCC5 PE=1 SV=3	XRCC5	1	0.00149342	105.03	K(1)TWTVVDAK	2	0.53915	1	1.058	1.16	1.107	0.975	0.909	0.916	0.842	0.0077198
P13010	332	K	X-ray repair cross-complementing protein 5 OS=Homo sapiens OX=9606 GN=XRCC5 PE=1 SV=3	XRCC5	1	0.000746166	120.06	VDEEQMK(1)YK	3	0.22012	2	1.276	1.217	1.268	0.835	0.834	0.838	0.667	0.00135531
P13010	282	K	X-ray repair cross-complementing protein 5 OS=Homo sapiens OX=9606 GN=XRCC5 PE=1 SV=3	XRCC5	1	0.00136922	73.632	TWTVVDAK(1)TLK	3	-0.086142	1	0.967	1.048	0.987	1.126	0.907	0.988	1.006	0.96756
P13010	543	K	X-ray repair cross-complementing protein 5 OS=Homo sapiens OX=9606 GN=XRCC5 PE=1 SV=3	XRCC5	1	0.000121953	105.98	TLFPLIEAK(1)K	2	0.6331	2	0.873	0.921	0.927	1.092	1.099	1.015	1.178	0.00676
P13010	534	K	X-ray repair cross-complementing protein 5 OS=Homo sapiens OX=9606 GN=XRCC5 PE=1 SV=3	XRCC5	1	1.02505e-18	130.2	IK(1)TLFPLIEAK	2	-1.2778	2
P13010	665	K	X-ray repair cross-complementing protein 5 OS=Homo sapiens OX=9606 GN=XRCC5 PE=1 SV=3	XRCC5	1	0.00128049	110.08	ALQEK(1)VEIK	3	0.14246	2	0.928	0.938	0.912	1.08	1.023	1.065	1.14	0.00196221
P13010	265	K	X-ray repair cross-complementing protein 5 OS=Homo sapiens OX=9606 GN=XRCC5 PE=1 SV=3	XRCC5	1	1.30266e-05	108.9	IAAYK(1)SILQER	3	-1.1994	2	0.818	0.867	0.966	1.063	1.108	1.076	1.225	0.0150992
P13010	532	K	X-ray repair cross-complementing protein 5 OS=Homo sapiens OX=9606 GN=XRCC5 PE=1 SV=3	XRCC5	1	0.00336743	73.499	SQIPLSK(1)IK	3	0.72846	1	0.91	0.823	0.926	1.062	1.081	1.105	1.222	0.006385
P13073	159	K	Cytochrome c oxidase subunit 4 isoform 1, mitochondrial OS=Homo sapiens OX=9606 GN=COX4I1 PE=1 SV=1	COX4I1	1	0.000976498	55.097	VNPIQGLASK(1)WDYEK	3	-2.2382	1	1.105	1.118	1.077	0.98	0.91	0.927	0.854	0.0030958
P13073	87	K	Cytochrome c oxidase subunit 4 isoform 1, mitochondrial OS=Homo sapiens OX=9606 GN=COX4I1 PE=1 SV=1	COX4I1	1	0.000762666	91.093	FK(1)ESFAEMNR	2	-2.2643	2	1.102	1.06	1.005	0.983	0.984	0.941	0.918	0.049758
P13073	53	K	Cytochrome c oxidase subunit 4 isoform 1, mitochondrial OS=Homo sapiens OX=9606 GN=COX4I1 PE=1 SV=1	COX4I1	1	0.00188808	49.537	DHPLPEVAHVK(1)HLSASQK	5	-0.54997	1	0.818	0.917	0.852	1.225	1.102	0.977	1.277	0.030215
P13196	211	K	5-aminolevulinate synthase, nonspecific, mitochondrial OS=Homo sapiens OX=9606 GN=ALAS1 PE=1 SV=2	ALAS1	1	0.00116209	113.41	K(1)NDHTYR	3	-0.80736	1	0.461	0.284	0.275	1.49	1.49	1.382	4.276	0.0127581
P13284	125	K	Gamma-interferon-inducible lysosomal thiol reductase OS=Homo sapiens OX=9606 GN=IFI30 PE=1 SV=3	IFI30	1	0.000950049	70.54	CQHGEEECK(1)FNK	3	-0.88891	1	1.225	1.286	1.376	0.931	0.76	0.735	0.624	0.0042249
P13639	32	K	Elongation factor 2 OS=Homo sapiens OX=9606 GN=EEF2 PE=1 SV=4	EEF2	1	0.000910029	50.858	NMSVIAHVDHGK(1)STLTDSLVCK	4	-0.77941	1	0.655	0.728	0.777	1.058	1.229	1.282	1.652	0.0028208
P13639	571	K	Elongation factor 2 OS=Homo sapiens OX=9606 GN=EEF2 PE=1 SV=4	EEF2	1	3.14699e-17	154.28	DLEEDHACIPIK(1)K	2	-0.69618	3	1.467	1.535	1.479	0.652	0.65	0.715	0.45	1.99925e-05
P13639	239	K	Elongation factor 2 OS=Homo sapiens OX=9606 GN=EEF2 PE=1 SV=4	EEF2	1	5.81808e-05	98.508	FAAK(1)GEGQLGPAER	2	-0.10958	1	0.891	0.823	0.851	1.082	1.105	1.122	1.29	0.00054227
P13639	594	K	Elongation factor 2 OS=Homo sapiens OX=9606 GN=EEF2 PE=1 SV=4	EEF2	1	1.69803e-09	110.12	ETVSEESNVLCLSK(1)SPNK	3	-0.52971	1	1.437	1.587	1.307	0.754	0.662	0.709	0.491	0.00046028
P13639	638	K	Elongation factor 2 OS=Homo sapiens OX=9606 GN=EEF2 PE=1 SV=4	EEF2	1	0.00117745	56.514	YLAEK(1)YEWDVAEAR	3	0.3266	1	0.797	0.838	0.954	1.004	1.199	1.081	1.268	0.032779
P13639	322	K	Elongation factor 2 OS=Homo sapiens OX=9606 GN=EEF2 PE=1 SV=4	EEF2	0.999999	9.8251e-05	93.424	LDIK(1)LDSEDKDK	3	-0.31955	1	1.032	1.079	0.998	0.998	0.985	0.962	0.947	0.098043
P13639	407	K	Elongation factor 2 OS=Homo sapiens OX=9606 GN=EEF2 PE=1 SV=4	EEF2	1	0.0228879	58.083	MVPTSDK(1)GR	2	0.76095	1	0.986	1.134	1.051	1.042	0.912	0.949	0.915	0.193475
P13639	445	K	Elongation factor 2 OS=Homo sapiens OX=9606 GN=EEF2 PE=1 SV=4	EEF2	0.999994	0.00168593	73.632	KEDLYLK(1)PIQR	3	1.7704	1	0.94	1.032	0.988	0.987	1.013	1.041	1.027	0.42604
P13639	598	K	Elongation factor 2 OS=Homo sapiens OX=9606 GN=EEF2 PE=1 SV=4	EEF2	1	0.00264743	98.997	SPNK(1)HNR	3	0.56105	1	1.312	1.363	1.338	0.73	0.742	0.857	0.58	0.00046399
P13639	275	K	Elongation factor 2 OS=Homo sapiens OX=9606 GN=EEF2 PE=1 SV=4	EEF2	1	7.23734e-06	121.56	FSK(1)SATSPEGK	2	-0.72447	2	0.916	0.842	0.84	1.107	1.093	1.091	1.267	0.00119593
P13639	235	K	Elongation factor 2 OS=Homo sapiens OX=9606 GN=EEF2 PE=1 SV=4	EEF2	1	3.0626e-15	103.83	QFAEMYVAK(1)FAAK	2	1.8205	2	0.99	0.96	0.936	1.064	0.995	1.038	1.073	0.050276
P13639	572	K	Elongation factor 2 OS=Homo sapiens OX=9606 GN=EEF2 PE=1 SV=4	EEF2	1	2.97502e-05	136.49	K(1)SDPVVSYR	2	0.50487	2	1.144	1.157	1.132	0.891	0.954	0.882	0.794	0.00081876
P13639	512	K	Elongation factor 2 OS=Homo sapiens OX=9606 GN=EEF2 PE=1 SV=4	EEF2	1	0.00914701	48.527	VAVEAK(1)NPADLPK	3	3.4741	1
P13639	426	K	Elongation factor 2 OS=Homo sapiens OX=9606 GN=EEF2 PE=1 SV=4	EEF2	1	4.51555e-07	113.76	VFSGLVSTGLK(1)VR	2	-1.0457	2	1.047	1.037	1.073	0.94	0.965	1.004	0.921	0.0193202
P13639	308	K	Elongation factor 2 OS=Homo sapiens OX=9606 GN=EEF2 PE=1 SV=4	EEF2	1	3.74293e-05	118.28	VFDAIMNFK(1)K	3	-1.1934	5	1.047	1.055	0.987	0.995	0.978	0.987	0.958	0.122605
P13639	439	K	Elongation factor 2 OS=Homo sapiens OX=9606 GN=EEF2 PE=1 SV=4	EEF2	0.999989	0.00470919	62.088	K(1)EDLYLKPIQR	3	-0.4787	1	0.991	1.016	1.059	0.956	1.028	0.987	0.969	0.3315
P13667	533	K	Protein disulfide-isomerase A4 OS=Homo sapiens OX=9606 GN=PDIA4 PE=1 SV=2	PDIA4	1	4.81651e-06	100.11	VVVGK(1)TFDSIVMDPK	3	0.47275	1	0.848	0.88	0.933	1.18	1.015	1.054	1.221	0.020219
P13667	245	K	Protein disulfide-isomerase A4 OS=Homo sapiens OX=9606 GN=PDIA4 PE=1 SV=2	PDIA4	1	4.19305e-10	133.05	VDATAETDLAK(1)R	3	0.10371	1	0.97	1.01	0.822	0.936	0.989	1.217	1.121	0.33328
P13667	163	K	Protein disulfide-isomerase A4 OS=Homo sapiens OX=9606 GN=PDIA4 PE=1 SV=2	PDIA4	1	0.00223549	82.85	TQEEIVAK(1)VR	2	0.15338	1	0.969	0.884	0.958	1.087	1.082	0.982	1.121	0.060543
P13667	362	K	Protein disulfide-isomerase A4 OS=Homo sapiens OX=9606 GN=PDIA4 PE=1 SV=2	PDIA4	1	3.42693e-09	111.77	VSQGQLVVMQPEK(1)FQSK	3	0.15801	2	1.079	1.176	1.218	0.833	0.919	0.94	0.775	0.0078776
P13667	366	K	Protein disulfide-isomerase A4 OS=Homo sapiens OX=9606 GN=PDIA4 PE=1 SV=2	PDIA4	1	0.0134518	81.525	FQSK(1)YEPR	2	-0.89652	1	1.018	1.006	0.85	0.993	1.042	1.067	1.079	0.2702
P13667	141	K	Protein disulfide-isomerase A4 OS=Homo sapiens OX=9606 GN=PDIA4 PE=1 SV=2	PDIA4	1	4.49829e-05	96.745	FDVSGYPTIK(1)ILK	3	0.068504	1	1.004	1.038	0.965	1.106	1.012	0.903	1.005	0.98002
P13667	256	K	Protein disulfide-isomerase A4 OS=Homo sapiens OX=9606 GN=PDIA4 PE=1 SV=2	PDIA4	1	0.00145331	76.01	FDVSGYPTLK(1)IFR	2	0.46895	1	0.806	0.932	0.955	0.99	1.142	1.083	1.194	0.057318
P13667	637	K	Protein disulfide-isomerase A4 OS=Homo sapiens OX=9606 GN=PDIA4 PE=1 SV=2	PDIA4	1	0.0028764	65.179	FIEEHATK(1)LSR	3	0.96679	1	0.975	0.992	1.022	0.992	1.127	0.908	1.013	0.89682
P13667	576	K	Protein disulfide-isomerase A4 OS=Homo sapiens OX=9606 GN=PDIA4 PE=1 SV=2	PDIA4	1	0.0059085	79.986	GQK(1)GLVIAK	2	0.31717	1	0.823	0.753	0.781	1.165	1.128	1.16	1.465	0.000159882
P13667	485	K	Protein disulfide-isomerase A4 OS=Homo sapiens OX=9606 GN=PDIA4 PE=1 SV=2	PDIA4	1	0.0258014	47.441	K(1)FAMEPEEFDSDTLR	2	-1.7388	1
P13674	157	K	Prolyl 4-hydroxylase subunit alpha-1 OS=Homo sapiens OX=9606 GN=P4HA1 PE=1 SV=2	P4HA1	1	0.0160685	52.579	GNLPGVK(1)HK	3	3.0273	1	1.243	1.085	1.124	0.965	0.899	0.859	0.789	0.0110803
P13693	102	K	Translationally-controlled tumor protein OS=Homo sapiens OX=9606 GN=TPT1 PE=1 SV=1	TPT1	1	9.8826e-05	102.52	GK(1)LEEQRPER	3	1.4151	1	0.878	0.979	0.896	1.018	1.094	1.069	1.155	0.021459
P13693	97	K	Translationally-controlled tumor protein OS=Homo sapiens OX=9606 GN=TPT1 PE=1 SV=1	TPT1	1	0.0195115	87.476	DYMK(1)SIK	3	0.35393	2	0.858	0.932	0.843	1.094	1.05	1.118	1.239	0.0039589
P13726	233	K	Tissue factor OS=Homo sapiens OX=9606 GN=F3 PE=1 SV=1	F3	1	2.77667e-05	95.57	K(1)STDSPVECMGQEK	3	2.065	1	0.588	0.527	0.659	1.34	1.252	1.254	2.168	0.00033987
P13797	582	K	Plastin-3 OS=Homo sapiens OX=9606 GN=PLS3 PE=1 SV=4	PLS3	1	0.000230424	82.529	SGNLTEDDK(1)HNNAK	3	0.6884	1	1.151	1.087	1.07	0.98	0.884	0.951	0.851	0.0128374
P13797	459	K	Plastin-3 OS=Homo sapiens OX=9606 GN=PLS3 PE=1 SV=4	PLS3	1	1.38021e-14	145.69	K(1)LENCNYAVELGK	2	1.0384	1	1.869	1.775	1.767	0.46	0.467	0.471	0.258	1.2353e-07
P13797	611	K	Plastin-3 OS=Homo sapiens OX=9606 GN=PLS3 PE=1 SV=4	PLS3	1	0.000197623	84.365	VYALPEDLVEVK(1)PK	3	1.2194	1	0.94	0.989	1.073	1.001	1.046	0.967	1.004	0.917
P13797	91	K	Plastin-3 OS=Homo sapiens OX=9606 GN=PLS3 PE=1 SV=4	PLS3	1	0.00585333	80.037	SSDIAK(1)TFR	2	0.26292	1	1.078	0.995	1.11	0.939	0.984	0.973	0.91	0.058203
P13798	196	K	Acylamino-acid-releasing enzyme OS=Homo sapiens OX=9606 GN=APEH PE=1 SV=4	APEH	1	0.0205476	87.476	K(1)PDQAIK	2	-1.0623	1	1.122	1.084	1.005	1.051	0.902	0.931	0.898	0.128682
P13804	206	K	Electron transfer flavoprotein subunit alpha, mitochondrial OS=Homo sapiens OX=9606 GN=ETFA PE=1 SV=1	ETFA	1	7.31174e-08	118.52	LTK(1)SDRPELTGAK	3	-0.38155	1	1.176	1.135	1.151	0.894	0.929	0.885	0.782	0.000163805
P13804	226	K	Electron transfer flavoprotein subunit alpha, mitochondrial OS=Homo sapiens OX=9606 GN=ETFA PE=1 SV=1	ETFA	1	0.000367891	107.79	GLK(1)SGENFK	3	-0.47172	2	1.236	1.185	1.179	0.837	0.802	0.972	0.725	0.0057222
P13804	62	K	Electron transfer flavoprotein subunit alpha, mitochondrial OS=Homo sapiens OX=9606 GN=ETFA PE=1 SV=1	ETFA	1	2.8427e-05	125.82	CDK(1)VAQDLCK	3	0.23851	2	1.786	1.774	1.719	0.455	0.538	0.49	0.281	1.70295e-05
P13804	331	K	Electron transfer flavoprotein subunit alpha, mitochondrial OS=Homo sapiens OX=9606 GN=ETFA PE=1 SV=1	ETFA	1	0.00405944	64.82	VVPEMTEILK(1)K	3	-1.0095	1	0.676	0.848	0.867	0.85	1.029	1.517	1.42	0.156723
P13861	243	K	cAMP-dependent protein kinase type II-alpha regulatory subunit OS=Homo sapiens OX=9606 GN=PRKAR2A PE=1 SV=2	PRKAR2A	1	0.0266967	73.26	IIVK(1)NNAK	2	0.14542	1
P13861	379	K	cAMP-dependent protein kinase type II-alpha regulatory subunit OS=Homo sapiens OX=9606 GN=PRKAR2A PE=1 SV=2	PRKAR2A	1	0.00222902	71.03	LLGPCMDIMK(1)R	3	-0.51879	2	1.403	1.491	1.483	0.719	0.659	0.711	0.477	2.2538e-05
P13861	122	K	cAMP-dependent protein kinase type II-alpha regulatory subunit OS=Homo sapiens OX=9606 GN=PRKAR2A PE=1 SV=2	PRKAR2A	1	0.00853663	56.043	VIHPK(1)TDEQR	3	-0.56942	1	0.908	0.841	0.943	1.11	1.025	1.093	1.199	0.0118786
P13987	90	K	CD59 glycoprotein OS=Homo sapiens OX=9606 GN=CD59 PE=1 SV=1	CD59	1	3.9152e-08	141.13	ENELTYYCCK(1)K	2	-0.33008	2	0.61	0.612	0.605	1.303	1.29	1.218	2.086	2.1035e-06
P13987	66	K	CD59 glycoprotein OS=Homo sapiens OX=9606 GN=CD59 PE=1 SV=1	CD59	1	4.46545e-17	135.72	CWK(1)FEHCNFNDVTTR	3	-2.6005	1	0.661	0.66	0.756	1.253	1.26	1.128	1.753	0.00061964
P13995	286	K	Bifunctional methylenetetrahydrofolate dehydrogenase/cyclohydrolase, mitochondrial OS=Homo sapiens OX=9606 GN=MTHFD2 PE=1 SV=2	MTHFD2	1	0.000396555	86.898	VHDPVTAK(1)PK	3	0.38004	2	1.021	0.982	1.027	0.975	1.005	1.017	0.989	0.59376
P14174	78	K	Macrophage migration inhibitory factor OS=Homo sapiens OX=9606 GN=MIF PE=1 SV=4	MIF	1	3.83319e-22	158.91	SYSK(1)LLCGLLAER	3	0.1406	8	1.323	1.366	1.333	0.787	0.762	0.78	0.579	1.1579e-06
P14314	149	K	Glucosidase 2 subunit beta OS=Homo sapiens OX=9606 GN=PRKCSH PE=1 SV=2	PRKCSH	1	0.00238819	115.71	ILIEDWK(1)K	3	0.41486	2	0.839	0.886	0.922	1.123	1.065	1.067	1.23	0.0030636
P14314	166	K	Glucosidase 2 subunit beta OS=Homo sapiens OX=9606 GN=PRKCSH PE=1 SV=2	PRKCSH	1	0.0163541	54.982	LIELQAGK(1)K	3	-0.098261	1	0.966	0.834	0.978	0.99	1.161	1.015	1.14	0.139899
P14314	436	K	Glucosidase 2 subunit beta OS=Homo sapiens OX=9606 GN=PRKCSH PE=1 SV=2	PRKCSH	1	0.0248988	82.452	LVSQK(1)PK	3	1.3444	2	1.151	1.066	1.057	0.921	0.978	0.936	0.866	0.0115372
P14314	196	K	Glucosidase 2 subunit beta OS=Homo sapiens OX=9606 GN=PRKCSH PE=1 SV=2	PRKCSH	1	4.96991e-05	91.657	EQHQK(1)LWEEQLAAAK	3	-0.6833	1	0.854	0.88	0.929	1.165	1.039	1.043	1.219	0.0117018
P14314	167	K	Glucosidase 2 subunit beta OS=Homo sapiens OX=9606 GN=PRKCSH PE=1 SV=2	PRKCSH	1	0.000407948	92.939	K(1)SLEDQVEMLR	2	-0.31791	1	0.916	0.87	0.893	1.121	1.014	1.102	1.208	0.005383
P14324	123	K	Farnesyl pyrophosphate synthase OS=Homo sapiens OX=9606 GN=FDPS PE=1 SV=4	FDPS	1	2.60355e-05	103.3	EVLEYNAIGGK(1)YNR	3	-0.69802	2	1.004	0.989	1.082	0.973	1.005	0.987	0.964	0.28994
P14550	85	K	Aldo-keto reductase family 1 member A1 OS=Homo sapiens OX=9606 GN=AKR1A1 PE=1 SV=3	AKR1A1	1	2.23389e-13	131.56	LWNTK(1)HHPEDVEPALR	3	0.13792	2	0.995	0.956	1.055	0.996	1.024	0.995	1.003	0.90762
P14550	263	K	Aldo-keto reductase family 1 member A1 OS=Homo sapiens OX=9606 GN=AKR1A1 PE=1 SV=3	AKR1A1	1	0.00349359	71.208	VICIPK(1)SITPSR	2	0.68724	1	1.122	1.081	1	0.94	1.004	0.94	0.9	0.061299
P14550	257	K	Aldo-keto reductase family 1 member A1 OS=Homo sapiens OX=9606 GN=AKR1A1 PE=1 SV=3	AKR1A1	1	0.0370527	77.282	K(1)VICIPK	2	0.1518	1
P14618	261	K	Pyruvate kinase PKM OS=Homo sapiens OX=9606 GN=PKM PE=1 SV=4	PKM	1	0.0157962	91.318	VLGEK(1)GK	2	-0.4202	1	1.051	1.04	0.964	1.017	1.024	0.944	0.977	0.57264
P14618	206	K	Pyruvate kinase PKM OS=Homo sapiens OX=9606 GN=PKM PE=1 SV=4	PKM	1	1.08588e-14	125.73	GADFLVTEVENGGSLGSK(1)K	3	-1.0495	1	0.902	0.97	0.881	1.031	1.118	1.035	1.157	0.020542
P14618	305	K	Pyruvate kinase PKM OS=Homo sapiens OX=9606 GN=PKM PE=1 SV=4	PKM	1	7.5408e-10	118.19	GDLGIEIPAEK(1)VFLAQK	4	0.35995	2	1.095	1.119	1.142	0.939	0.909	0.929	0.827	0.00025713
P14618	115	K	Pyruvate kinase PKM OS=Homo sapiens OX=9606 GN=PKM PE=1 SV=4	PKM	1	3.47967e-11	130.72	PVAVALDTK(1)GPEIR	2	1.2745	2	1.028	1.027	0.944	0.983	0.981	1.054	1.006	0.86752
P14618	322	K	Pyruvate kinase PKM OS=Homo sapiens OX=9606 GN=PKM PE=1 SV=4	PKM	1	4.11221e-09	110.12	AGK(1)PVICATQMLESMIK	3	0.3365	2	1.583	1.521	1.528	0.626	0.629	0.664	0.414	1.32e-06
P14618	135	K	Pyruvate kinase PKM OS=Homo sapiens OX=9606 GN=PKM PE=1 SV=4	PKM	1	0.000816586	85.813	GSGTAEVELK(1)K	3	0.01579	2	1.137	1.062	1.061	0.92	0.987	0.936	0.872	0.0118035
P14618	166	K	Pyruvate kinase PKM OS=Homo sapiens OX=9606 GN=PKM PE=1 SV=4	PKM	1	6.51336e-05	106.32	NICK(1)VVEVGSK	3	-1.2174	2	0.955	0.968	0.946	1.014	1.02	1.068	1.081	0.0117171
P14618	498	K	Pyruvate kinase PKM OS=Homo sapiens OX=9606 GN=PKM PE=1 SV=4	PKM	1	0.000917	89.561	VNFAMNVGK(1)AR	2	-3.9309	1	1.18	1.28	1.285	0.836	0.828	0.849	0.671	0.000158516
P14618	162	K	Pyruvate kinase PKM OS=Homo sapiens OX=9606 GN=PKM PE=1 SV=4	PKM	1	6.49953e-05	90.725	CDENILWLDYK(1)NICK	3	-0.11353	1	1.459	1.39	1.578	0.656	0.756	0.643	0.464	0.00025908
P14618	89	K	Pyruvate kinase PKM OS=Homo sapiens OX=9606 GN=PKM PE=1 SV=4	PKM	1	2.80479e-21	135.43	LNFSHGTHEYHAETIK(1)NVR	4	-0.082412	2	0.91	0.984	0.953	1.142	1.029	0.956	1.098	0.179144
P14618	433	K	Pyruvate kinase PKM OS=Homo sapiens OX=9606 GN=PKM PE=1 SV=4	PKM	1	5.92702e-11	129.15	CCSGAIIVLTK(1)SGR	2	-1.8755	2	0.986	0.951	0.897	1.029	1.073	1.029	1.105	0.031544
P14618	66	K	Pyruvate kinase PKM OS=Homo sapiens OX=9606 GN=PKM PE=1 SV=4	PKM	1	2.47555e-05	115.57	EMIK(1)SGMNVAR	3	-0.44047	4	1.039	1.067	1.066	1.004	0.953	0.946	0.915	0.0126036
P14618	62	K	Pyruvate kinase PKM OS=Homo sapiens OX=9606 GN=PKM PE=1 SV=4	PKM	1	2.04375e-14	161.99	SVETLK(1)EMIK	3	0.37265	5	1.076	1.117	1.078	0.953	0.922	0.96	0.867	0.00119515
P14618	270	K	Pyruvate kinase PKM OS=Homo sapiens OX=9606 GN=PKM PE=1 SV=4	PKM	1	2.2114e-10	143.46	IISK(1)IENHEGVR	2	-0.4511	3	0.875	0.928	0.874	1.073	1.095	1.067	1.208	0.00087976
P14618	247	K	Pyruvate kinase PKM OS=Homo sapiens OX=9606 GN=PKM PE=1 SV=4	PKM	1	0.00133318	84.687	K(1)ASDVHEVR	2	0.33963	3	0.911	0.989	0.935	1.027	1.056	1.042	1.102	0.0185582
P14625	479	K	Endoplasmin OS=Homo sapiens OX=9606 GN=HSP90B1 PE=1 SV=1	HSP90B1	1	5.67938e-14	156.24	IADDK(1)YNDTFWK	2	-0.16387	2	0.942	0.953	0.925	1.086	1.021	1.034	1.114	0.0065756
P14625	161	K	Endoplasmin OS=Homo sapiens OX=9606 GN=HSP90B1 PE=1 SV=1	HSP90B1	1	7.18036e-07	118.52	EELVK(1)NLGTIAK	2	-0.88686	2	0.871	0.91	0.884	1.117	1.089	1.04	1.218	0.00130443
P14625	95	K	Endoplasmin OS=Homo sapiens OX=9606 GN=HSP90B1 PE=1 SV=1	HSP90B1	1	1.53765e-05	119.68	LIINSLYK(1)NK	2	-0.46181	2	0.755	0.869	0.835	1.15	1.139	1.094	1.376	0.00197879
P14625	142	K	Endoplasmin OS=Homo sapiens OX=9606 GN=HSP90B1 PE=1 SV=1	HSP90B1	1	6.10147e-12	125.51	EK(1)NLLHVTDTGVGMTR	2	-0.63689	4	1.037	1.156	1.224	0.911	0.988	0.835	0.8	0.031538
P14625	168	K	Endoplasmin OS=Homo sapiens OX=9606 GN=HSP90B1 PE=1 SV=1	HSP90B1	1	3.36963e-23	154.46	NLGTIAK(1)SGTSEFLNK	3	-0.29055	1	0.843	0.978	0.916	1.042	1.079	1.07	1.166	0.024723
P14625	682	K	Endoplasmin OS=Homo sapiens OX=9606 GN=HSP90B1 PE=1 SV=1	HSP90B1	1	0.00116695	72.34	DISTNYYASQK(1)K	3	-0.70638	2	1.028	0.99	1.06	0.978	1.029	0.959	0.964	0.26732
P14625	467	K	Endoplasmin OS=Homo sapiens OX=9606 GN=HSP90B1 PE=1 SV=1	HSP90B1	1	0.0260932	82.287	K(1)TLDMIK	2	-1.9897	1	0.517	0.571	0.564	1.316	1.312	1.296	2.375	0.00132479
P14625	623	K	Endoplasmin OS=Homo sapiens OX=9606 GN=HSP90B1 PE=1 SV=1	HSP90B1	1	0.021322	44.511	EFEPLLNWMK(1)DK	3	-2.7525	2	0.99	0.883	0.952	1.055	1.023	1.063	1.112	0.039555
P14625	683	K	Endoplasmin OS=Homo sapiens OX=9606 GN=HSP90B1 PE=1 SV=1	HSP90B1	1	0.00111362	107.57	K(1)TFEINPR	3	-2.094	1	1.005	0.968	1.023	0.963	1.032	1.022	1.007	0.81448
P14625	603	K	Endoplasmin OS=Homo sapiens OX=9606 GN=HSP90B1 PE=1 SV=1	HSP90B1	1	0.0217346	76.282	FDESEK(1)TK	3	-1.079	2	0.875	0.804	0.802	1.123	1.14	1.106	1.358	0.00051584
P14625	473	K	Endoplasmin OS=Homo sapiens OX=9606 GN=HSP90B1 PE=1 SV=1	HSP90B1	1	0.0291692	80.438	TLDMIK(1)K	3	-0.98878	2	0.833	0.741	0.715	1.239	1.084	1.181	1.531	0.0021359
P14625	404	K	Endoplasmin OS=Homo sapiens OX=9606 GN=HSP90B1 PE=1 SV=1	HSP90B1	1	0.000137347	116.55	GLFDEYGSK(1)K	3	-0.058396	3	0.933	0.873	0.947	1.08	1.065	1.041	1.157	0.0057412
P14735	308	K	Insulin-degrading enzyme OS=Homo sapiens OX=9606 GN=IDE PE=1 SV=4	IDE	1	0.0261833	73.573	IVPIK(1)DIR	2	-0.027358	1	0.976	0.948	0.961	0.998	1.08	1.016	1.072	0.051902
P14735	512	K	Insulin-degrading enzyme OS=Homo sapiens OX=9606 GN=IDE PE=1 SV=4	IDE	1	5.19808e-06	89.301	K(1)WQNADLNGK	2	0.761	1
P14735	483	K	Insulin-degrading enzyme OS=Homo sapiens OX=9606 GN=IDE PE=1 SV=4	IDE	1	6.05031e-08	138.24	VAIVSK(1)SFEGK	2	0.019054	1	1.108	0.994	1.084	0.925	0.981	0.986	0.908	0.069164
P14735	217	K	Insulin-degrading enzyme OS=Homo sapiens OX=9606 GN=IDE PE=1 SV=4	IDE	1	0.0203102	43.604	HPFSK(1)FGTGNK	3	1.5604	1
P14735	933	K	Insulin-degrading enzyme OS=Homo sapiens OX=9606 GN=IDE PE=1 SV=4	IDE	1	0.0014312	103.91	TLTK(1)EDIIK	2	-0.33583	1	1.015	1.045	0.972	1.033	1	0.965	0.989	0.71662
P14866	493	K	Heterogeneous nuclear ribonucleoprotein L OS=Homo sapiens OX=9606 GN=HNRNPL PE=1 SV=2	HNRNPL	1	5.8318e-08	138.51	FSTPEQAAK(1)NR	2	-1.0386	1	0.874	0.939	0.92	1.077	1.094	1.028	1.171	0.0051408
P14868	338	K	Aspartate--tRNA ligase, cytoplasmic OS=Homo sapiens OX=9606 GN=DARS PE=1 SV=2	DARS	1	4.60045e-06	100.43	QFPCEPFK(1)FLEPTLR	3	-1.4142	1	1.096	1.285	1.257	0.813	0.934	0.834	0.709	0.0063847
P14868	381	K	Aspartate--tRNA ligase, cytoplasmic OS=Homo sapiens OX=9606 GN=DARS PE=1 SV=2	DARS	1	0.00664832	64.711	LLGHLVK(1)EK	3	0.67595	1	1.06	1.232	1.091	0.892	0.898	0.964	0.814	0.0175245
P14868	451	K	Aspartate--tRNA ligase, cytoplasmic OS=Homo sapiens OX=9606 GN=DARS PE=1 SV=2	DARS	1	0.000281916	82.417	ALHHGIDLEK(1)IK	4	0.2584	1	1.017	1.037	0.916	1.08	0.93	1.031	1.024	0.713
P15121	243	K	Aldo-keto reductase family 1 member B1 OS=Homo sapiens OX=9606 GN=AKR1B1 PE=1 SV=3	AKR1B1	1	5.30223e-05	108.01	HNK(1)TTAQVLIR	2	-4.4837	2	1.004	1.099	0.888	0.979	1.023	1.02	1.01	0.83712
P15121	240	K	Aldo-keto reductase family 1 member B1 OS=Homo sapiens OX=9606 GN=AKR1B1 PE=1 SV=3	AKR1B1	1	0.0034858	81.784	AIAAK(1)HNK	3	0.05299	2	0.966	0.92	0.897	1.008	0.995	1.156	1.135	0.076781
P15121	90	K	Aldo-keto reductase family 1 member B1 OS=Homo sapiens OX=9606 GN=AKR1B1 PE=1 SV=3	AKR1B1	1	0.000416412	126.07	GLVK(1)GACQK	2	-0.5039	1	1.361	1.419	1.285	0.753	0.734	0.813	0.566	0.000176128
P15121	179	K	Aldo-keto reductase family 1 member B1 OS=Homo sapiens OX=9606 GN=AKR1B1 PE=1 SV=3	AKR1B1	1	2.41229e-20	142.26	YK(1)PAVNQIECHPYLTQEK	3	-0.79811	1	1.121	1.217	1.234	0.892	0.884	0.855	0.737	0.00072422
P15121	95	K	Aldo-keto reductase family 1 member B1 OS=Homo sapiens OX=9606 GN=AKR1B1 PE=1 SV=3	AKR1B1	1	6.67229e-06	122.46	GACQK(1)TLSDLK	2	-1.0993	1	1.273	1.303	1.245	0.809	0.797	0.857	0.645	6.451e-05
P15121	263	K	Aldo-keto reductase family 1 member B1 OS=Homo sapiens OX=9606 GN=AKR1B1 PE=1 SV=3	AKR1B1	1	0.000911237	83.243	NLVVIPK(1)SVTPER	3	0.074795	2	0.747	0.861	0.808	1.13	1.156	1.121	1.41	0.00120168
P15121	86	K	Aldo-keto reductase family 1 member B1 OS=Homo sapiens OX=9606 GN=AKR1B1 PE=1 SV=3	AKR1B1	1	7.49529e-06	105.65	LWCTYHEK(1)GLVK	3	0.043897	2	1.301	1.284	1.296	0.831	0.825	0.771	0.625	4.0659e-05
P15170	238	K	Eukaryotic peptide chain release factor GTP-binding subunit ERF3A OS=Homo sapiens OX=9606 GN=GSPT1 PE=1 SV=1	GSPT1	1	0.0233636	83.948	YEECK(1)EK	2	0.36512	1	1.243	1.305	1.29	0.853	0.849	0.753	0.64	0.00049716
P15170	152	K	Eukaryotic peptide chain release factor GTP-binding subunit ERF3A OS=Homo sapiens OX=9606 GN=GSPT1 PE=1 SV=1	GSPT1	1	0.000279526	88.021	K(1)HFTILDAPGHK	4	-0.41372	1	1.175	0.984	1.068	0.932	0.989	0.948	0.889	0.100636
P15170	309	K	Eukaryotic peptide chain release factor GTP-binding subunit ERF3A OS=Homo sapiens OX=9606 GN=GSPT1 PE=1 SV=1	GSPT1	1	0.00620431	83.948	LPIVDK(1)YK	3	-0.07529	2	1.24	1.185	1.202	0.89	0.82	0.887	0.716	0.00036219
P15170	208	K	Eukaryotic peptide chain release factor GTP-binding subunit ERF3A OS=Homo sapiens OX=9606 GN=GSPT1 PE=1 SV=1	GSPT1	1	0.000152978	90.697	EHAMLAK(1)TAGVK	4	-1.8069	2	1.118	1.094	1.1	0.925	0.955	0.927	0.848	0.000175097
P15170	469	K	Eukaryotic peptide chain release factor GTP-binding subunit ERF3A OS=Homo sapiens OX=9606 GN=GSPT1 PE=1 SV=1	GSPT1	1	3.18972e-05	85.362	TAGTICLETFK(1)DFPQMGR	3	-1.8427	1
P15170	254	K	Eukaryotic peptide chain release factor GTP-binding subunit ERF3A OS=Homo sapiens OX=9606 GN=GSPT1 PE=1 SV=1	GSPT1	1	6.93117e-05	68.41	K(1)DIHFMPCSGLTGANLK	3	-0.59719	3	1.192	1.138	1.355	0.786	0.912	0.854	0.693	0.0056216
P15170	151	K	Eukaryotic peptide chain release factor GTP-binding subunit ERF3A OS=Homo sapiens OX=9606 GN=GSPT1 PE=1 SV=1	GSPT1	1	0.00414554	101.65	AYFETEK(1)K	3	1.186	2	1.015	1.056	1.044	1.021	0.996	0.925	0.944	0.143917
P15170	247	K	Eukaryotic peptide chain release factor GTP-binding subunit ERF3A OS=Homo sapiens OX=9606 GN=GSPT1 PE=1 SV=1	GSPT1	1	0.0207116	87.323	K(1)VGFNPK	2	-0.07966	1	1.055	1.062	1.079	0.941	0.999	0.944	0.902	0.0074014
P15260	115	K	Interferon gamma receptor 1 OS=Homo sapiens OX=9606 GN=IFNGR1 PE=1 SV=1	IFNGR1	1	0.00354053	53.3	ESAYAK(1)SEEFAVCR	3	-0.13192	1
P15291	348	K	Beta-1,4-galactosyltransferase 1 OS=Homo sapiens OX=9606 GN=B4GALT1 PE=1 SV=5	B4GALT1	1	0.0295481	72.23	K(1)NEPNPQR	2	0.42742	1	0.751	0.632	0.648	1.279	1.22	1.18	1.811	0.0005237
P15311	357	K	Ezrin OS=Homo sapiens OX=9606 GN=EZR PE=1 SV=4	EZR	1	0.0014171	99.5	LQDYEEK(1)TK	2	0.27852	1	0.931	0.816	0.912	1.068	1.13	1.051	1.222	0.0122792
P15311	458	K	Ezrin OS=Homo sapiens OX=9606 GN=EZR PE=1 SV=4	EZR	1	0.00196489	84.365	EAQDDLVK(1)TK	3	0.33861	2	0.887	0.841	0.868	1.112	1.104	1.077	1.268	0.000199698
P15559	271	K	NAD(P)H dehydrogenase [quinone] 1 OS=Homo sapiens OX=9606 GN=NQO1 PE=1 SV=1	NQO1	1	5.48436e-09	143.24	SIPTDNQIK(1)AR	3	0.023637	3	1.118	1.077	1.1	0.924	0.977	0.919	0.856	0.0022197
P15559	248	K	NAD(P)H dehydrogenase [quinone] 1 OS=Homo sapiens OX=9606 GN=NQO1 PE=1 SV=1	NQO1	1	7.29526e-06	93.096	KEVQDEEK(1)NK	3	4.2467	1
P15559	31	K	NAD(P)H dehydrogenase [quinone] 1 OS=Homo sapiens OX=9606 GN=NQO1 PE=1 SV=1	NQO1	1	0.000797971	119.68	EAAAAALK(1)K	2	-1.1108	2	0.913	0.901	0.846	1.126	1.066	1.059	1.222	0.0027597
P15692	152	K	Vascular endothelial growth factor A OS=Homo sapiens OX=9606 GN=VEGFA PE=1 SV=2	VEGFA	1	0.0158118	68.016	GK(1)GK(1)GQK(1)R	3	0.20842	1	0.619	0.836	0.835	1.054	1.197	1.23	1.52	0.0183197
P15692	149	K	Vascular endothelial growth factor A OS=Homo sapiens OX=9606 GN=VEGFA PE=1 SV=2	VEGFA	1	0.0158118	68.016	GK(1)GK(1)GQK(1)R	3	0.20842	1	0.619	0.836	0.835	1.054	1.197	1.23	1.52	0.0183197
P15692	147	K	Vascular endothelial growth factor A OS=Homo sapiens OX=9606 GN=VEGFA PE=1 SV=2	VEGFA	1	0.0158118	68.016	GK(1)GK(1)GQK(1)R	3	0.20842	1	0.619	0.836	0.835	1.054	1.197	1.23	1.52	0.0183197
P15880	275	K	40S ribosomal protein S2 OS=Homo sapiens OX=9606 GN=RPS2 PE=1 SV=2	RPS2	1	0.00013314	66.289	SPYQEFTDHLVK(1)THTR	4	-0.31731	1		0.19	0.445	1.296	1.113	1.35	3.946	0.020878
P15880	263	K	40S ribosomal protein S2 OS=Homo sapiens OX=9606 GN=RPS2 PE=1 SV=2	RPS2	1	6.82118e-35	167.28	ETVFTK(1)SPYQEFTDHLVK	4	1.4412	2	0.946	0.91	1.008	0.989	1.057	1.06	1.084	0.095084
P15880	65	K	40S ribosomal protein S2 OS=Homo sapiens OX=9606 GN=RPS2 PE=1 SV=2	RPS2	1	1.24909e-11	130.47	AEDKEWMPVTK(1)LGR	3	-0.013822	1	0.923	0.909	0.905	1.084	1.054	1.057	1.167	0.000137324
P15880	211	K	40S ribosomal protein S2 OS=Homo sapiens OX=9606 GN=RPS2 PE=1 SV=2	RPS2	1	0.00102529	86.772	GTGIVSAPVPK(1)K	3	0.90144	2	0.933	0.888	0.853	1.12	1.051	1.071	1.212	0.0038395
P15924	2778	K	Desmoplakin OS=Homo sapiens OX=9606 GN=DSP PE=1 SV=3	DSP	1	0.00540315	95.775	ILTCPK(1)TK	3	0.28722	2	1.629	1.493	1.603	0.599	0.624	0.634	0.393	3.948e-06
P15924	1091	K	Desmoplakin OS=Homo sapiens OX=9606 GN=DSP PE=1 SV=3	DSP	1	0.0097016	72.705	QAELDGK(1)SAK	2	-1.6815	1	1.192	1.057	1.169	0.866	0.922	0.948	0.8	0.0084039
P15924	1144	K	Desmoplakin OS=Homo sapiens OX=9606 GN=DSP PE=1 SV=3	DSP	1	0.00870934	73.881	NDYDQLQK(1)AR	2	0.6607	1	1.452	1.523	1.398	0.634	0.744	0.711	0.478	0.000159996
P15924	1073	K	Desmoplakin OS=Homo sapiens OX=9606 GN=DSP PE=1 SV=3	DSP	1	0.00126733	75.102	YQAECSQFK(1)AK	2	-0.57564	2	1.782	1.777	1.795	0.487	0.466	0.48	0.268	3.1201e-08
P15924	1840	K	Desmoplakin OS=Homo sapiens OX=9606 GN=DSP PE=1 SV=3	DSP	1	0.0302463	57.52	AK(1)STLEAETR	2	2.0926	1
P15924	478	K	Desmoplakin OS=Homo sapiens OX=9606 GN=DSP PE=1 SV=3	DSP	1	0.000142635	91.961	IVHK(1)GDECILK	3	0.58642	1	1.575	1.541	1.528	0.623	0.661	0.627	0.411	9.0198e-07
P15941	1189	K	Mucin-1 OS=Homo sapiens OX=9606 GN=MUC1 PE=1 SV=3	MUC1	1	2.42186e-05	105.95	K(1)NYGQLDIFPAR	2	0.45393	1	0.961	1.003	1.01	1.021	1.019	0.997	1.021	0.2891
P16104	120	K	Histone H2AX OS=Homo sapiens OX=9606 GN=H2AFX PE=1 SV=2	H2AFX	1	0.00149485	105.46	K(1)TSATVGPK	3	0.93438	2	0.886	0.847	0.862	1.084	1.071	1.135	1.268	0.00042018
P16104	134	K	Histone H2AX OS=Homo sapiens OX=9606 GN=H2AFX PE=1 SV=2	H2AFX	1	0.0078107	85.359	APSGGK(1)K	3	-0.041331	1	1.186	1.391	1.219	0.85	0.81	0.818	0.653	0.00117605
P16144	36	K	Integrin beta-4 OS=Homo sapiens OX=9606 GN=ITGB4 PE=1 SV=5	ITGB4	1	0.00512257	73.881	APVK(1)SCTECVR	2	0.39398	2	0.991	0.993	1.073	0.966	0.989	1.022	0.974	0.4453
P16144	834	K	Integrin beta-4 OS=Homo sapiens OX=9606 GN=ITGB4 PE=1 SV=5	ITGB4	1	1.56452e-06	115.12	LCTENLLK(1)PDTR	3	-0.48166	2	1.603	1.662	1.661	0.6	0.55	0.57	0.349	1.481e-06
P16144	1021	K	Integrin beta-4 OS=Homo sapiens OX=9606 GN=ITGB4 PE=1 SV=5	ITGB4	1	0.020632	42.446	VLDGGK(1)SQVSYR	3	1.4006	1	0.927	1.018	0.959	1.01	1.087	0.984	1.061	0.21842
P16144	654	K	Integrin beta-4 OS=Homo sapiens OX=9606 GN=ITGB4 PE=1 SV=5	ITGB4	1	0.00207147	74.841	TCEECNFK(1)VK	3	-0.022736	1	0.844	0.901	0.999	1.041	1.105	1.039	1.161	0.0466
P16152	180	K	Carbonyl reductase [NADPH] 1 OS=Homo sapiens OX=9606 GN=CBR1 PE=1 SV=3	CBR1	1	0.0339708	78.516	FVEDTK(1)K	2	-0.14415	1	0.925	1.028	0.914	1.057	0.972	1.077	1.083	0.174944
P16152	157	K	Carbonyl reductase [NADPH] 1 OS=Homo sapiens OX=9606 GN=CBR1 PE=1 SV=3	CBR1	1	0.00063309	81.676	SCSPELQQK(1)FR	3	0.58195	2	1.181	1.15	1.07	0.893	0.912	0.944	0.808	0.0032232
P16152	148	K	Carbonyl reductase [NADPH] 1 OS=Homo sapiens OX=9606 GN=CBR1 PE=1 SV=3	CBR1	1	1.16643e-09	133.16	ALK(1)SCSPELQQK	2	0.15889	2	1.322	1.372	1.382	0.781	0.749	0.762	0.562	3.0696e-06
P16278	356	K	Beta-galactosidase OS=Homo sapiens OX=9606 GN=GLB1 PE=1 SV=2	GLB1	1	0.00310268	107.79	NIIQK(1)FEK	2	0.44443	1	0.886	0.981	0.868	1.085	1.123	0.99	1.169	0.042724
P16401	35	K	Histone H1.5 OS=Homo sapiens OX=9606 GN=H1-5 PE=1 SV=3	H1-5	1	0.0340792	60.91	AAGAGAAK(1)R	2	0.70227	1	1.133	1.174	1.168	0.991	0.87	0.842	0.778	0.0076239
P16401	88	K	Histone H1.5 OS=Homo sapiens OX=9606 GN=H1-5 PE=1 SV=3	H1-5	1	0.0297174	62.466	LGLK(1)SLVSK	2	0.083519	1	0.945	0.953	0.932	1.051	1.002	1.079	1.107	0.011136
P16401	120	K	Histone H1.5 OS=Homo sapiens OX=9606 GN=H1-5 PE=1 SV=3	H1-5	1	0.00430261	82.417	AASGEAK(1)PK	2	0.48881	1	0.967	0.81	0.886	1.15	1.058	1.046	1.222	0.026959
P16401	49	K	Histone H1.5 OS=Homo sapiens OX=9606 GN=H1-5 PE=1 SV=3	H1-5	1	5.89423e-15	131.45	ATGPPVSELITK(1)AVAASK	3	0.24822	1	0.883	0.923	0.97	1.091	1.033	1.045	1.142	0.0139797
P16401	66	K	Histone H1.5 OS=Homo sapiens OX=9606 GN=H1-5 PE=1 SV=3	H1-5	1	0.00184789	81.017	NGLSLAALK(1)K	3	0.76187	1	0.898	0.703	0.777	1.093	1.185	1.16	1.446	0.0076435
P16401	168	K	Histone H1.5 OS=Homo sapiens OX=9606 GN=H1-5 PE=1 SV=3	H1-5	1	0.00158566	81.95	KPAAAGVK(1)K	3	-0.074268	1
P16401	78	K	Histone H1.5 OS=Homo sapiens OX=9606 GN=H1-5 PE=1 SV=3	H1-5	1	0.000568391	60.657	ALAAGGYDVEK(1)NNSR	3	0.34659	1
P16403	168	K	Histone H1.2 OS=Homo sapiens OX=9606 GN=H1-2 PE=1 SV=2	H1-2	0.999986	0.00282329	50.786	KPAAATVTK(1)K	3	-0.21701	1
P16422	106	K	Epithelial cell adhesion molecule OS=Homo sapiens OX=9606 GN=EPCAM PE=1 SV=2	EPCAM	1	1.06393e-16	97.771	AKPEGALQNNDGLYDPDCDESGLFK(1)AK	4	-0.73346	3	0.778	0.711	0.724	1.211	1.164	1.175	1.604	9.7064e-05
P16422	160	K	Epithelial cell adhesion molecule OS=Homo sapiens OX=9606 GN=EPCAM PE=1 SV=2	EPCAM	1	0.000107872	110.08	EKPYDSK(1)SLR	2	-0.057166	2	0.152	0.147	0.146	1.691	1.532	1.522	10.663	1.6533e-07
P16615	541	K	Sarcoplasmic/endoplasmic reticulum calcium ATPase 2 OS=Homo sapiens OX=9606 GN=ATP2A2 PE=1 SV=1	ATP2A2	1	0.0307874	57.174	VPMTSGVK(1)QK	2	0.027467	1	0.824	0.973	1.09	1.019	0.959	1.107	1.069	0.4793
P16949	128	K	Stathmin OS=Homo sapiens OX=9606 GN=STMN1 PE=1 SV=3	STMN1	0.793663	0.00860165	59.418	EK(0.206)DK(0.794)HIEEVR	4	-1.0953	1	0.696	0.995	0.812	1.134	1.061	1.152	1.337	0.047682
P16949	52	K	Stathmin OS=Homo sapiens OX=9606 GN=STMN1 PE=1 SV=3	STMN1	1	0.000137347	116.55	DLSLEEIQK(1)K	2	0.11186	2	0.899	0.86	0.946	1.089	1.098	1.031	1.19	0.0068176
P16949	43	K	Stathmin OS=Homo sapiens OX=9606 GN=STMN1 PE=1 SV=3	STMN1	1	1.6643e-07	142.83	K(1)DLSLEEIQK	2	0.52346	2	0.826	0.884	0.777	1.103	1.106	1.153	1.352	0.00162227
P16949	62	K	Stathmin OS=Homo sapiens OX=9606 GN=STMN1 PE=1 SV=3	STMN1	1	0.00103582	96.604	K(1)SHEAEVLK	2	0.44467	3	0.818	0.847	0.792	1.171	1.107	1.108	1.378	0.00028083
P16949	41	K	Stathmin OS=Homo sapiens OX=9606 GN=STMN1 PE=1 SV=3	STMN1	1	0.0040994	54.343	ESVPEFPLSPPK(1)K	3	1.0018	1	0.941	0.886	0.916	1.08	1.063	1.05	1.164	0.00138073
P16989	90	K	Y-box-binding protein 3 OS=Homo sapiens OX=9606 GN=YBX3 PE=1 SV=4	YBX3	1	1.06322e-06	92.856	VLATK(1)VLGTVK	2	-1.9225	1
P16989	96	K	Y-box-binding protein 3 OS=Homo sapiens OX=9606 GN=YBX3 PE=1 SV=4	YBX3	1	0.00140097	73.327	VLGTVK(1)WFNVR	3	-3.4432	1	0.742	0.884	0.716	1.136	1.168	1.155	1.477	0.026617
P17096	15	K	High mobility group protein HMG-I/HMG-Y OS=Homo sapiens OX=9606 GN=HMGA1 PE=1 SV=3	HMGA1	1	2.08301e-08	143.25	SSQPLASK(1)QEK	3	-1.125	2	1.219	1.344	1.257	0.827	0.802	0.835	0.645	0.000155598
P17174	214	K	Aspartate aminotransferase, cytoplasmic OS=Homo sapiens OX=9606 GN=GOT1 PE=1 SV=3	GOT1	1	0.0080278	62.005	QIASVMK(1)HR	3	0.18056	1
P17174	97	K	Aspartate aminotransferase, cytoplasmic OS=Homo sapiens OX=9606 GN=GOT1 PE=1 SV=3	GOT1	1	0.000526115	69.03	LALGDDSPALK(1)EK	3	4.0464	1	0.768	0.717	0.76	1.092	1.374	1.06	1.571	0.0062823
P17252	575	K	Protein kinase C alpha type OS=Homo sapiens OX=9606 GN=PRKCA PE=1 SV=4	PRKCA	1	0.00296928	74.92	GLMTK(1)HPAK	3	-0.94664	1	1.458	1.172	1.271	0.802	0.869	0.748	0.62	0.0034987
P17301	261	K	Integrin alpha-2 OS=Homo sapiens OX=9606 GN=ITGA2 PE=1 SV=1	ITGA2	1	5.75495e-08	138.89	K(1)YAYSAASGGR	2	-0.52946	1	0.253	0.307	0.334	1.631	1.406	1.406	4.97	7.7205e-05
P17480	384	K	Nucleolar transcription factor 1 OS=Homo sapiens OX=9606 GN=UBTF PE=1 SV=1	UBTF	1	0.0263718	91.906	MLNINK(1)K	2	-1.1699	1	0.56	0.552	0.558	1.343	1.257	1.315	2.344	9.0789e-07
P17480	284	K	Nucleolar transcription factor 1 OS=Homo sapiens OX=9606 GN=UBTF PE=1 SV=1	UBTF	1	0.00495568	98.044	STLTK(1)AER	2	2.2698	1	0.847	0.752	0.764	1.241	1.044	1.169	1.462	0.0038446
P17612	22	K	cAMP-dependent protein kinase catalytic subunit alpha OS=Homo sapiens OX=9606 GN=PRKACA PE=1 SV=2	PRKACA	1	0.0227988	84.498	EFLAK(1)AK	2	-0.011068	1	1.07	1.083	1.048	0.956	0.978	0.95	0.901	0.00132187
P17612	93	K	cAMP-dependent protein kinase catalytic subunit alpha OS=Homo sapiens OX=9606 GN=PRKACA PE=1 SV=2	PRKACA	1	0.00236743	76.332	QIEHTLNEK(1)R	3	0.54535	1
P17612	318	K	cAMP-dependent protein kinase catalytic subunit alpha OS=Homo sapiens OX=9606 GN=PRKACA PE=1 SV=2	PRKACA	0.999997	0.000101881	63.091	KVEAPFIPK(1)FK	3	0.41776	1
P17676	269	K	CCAAT/enhancer-binding protein beta OS=Homo sapiens OX=9606 GN=CEBPB PE=1 SV=2	CEBPB	1	4.2084e-05	115.33	TVDK(1)HSDEYK	3	-0.2183	1	0.794	0.772	0.754	1.139	1.09	1.244	1.497	0.00064114
P17812	489	K	CTP synthase 1 OS=Homo sapiens OX=9606 GN=CTPS1 PE=1 SV=2	CTPS1	1	0.0419533	43.77	FEVNPVWK(1)K	3	-1.2884	1	1.343	1.211	1.31	0.859	0.72	0.86	0.631	0.002279
P17844	197	K	Probable ATP-dependent RNA helicase DDX5 OS=Homo sapiens OX=9606 GN=DDX5 PE=1 SV=1	DDX5	1	7.68943e-05	102.9	LK(1)STCIYGGAPK	3	-1.9744	2	1.857	1.777	1.81	0.443	0.473	0.458	0.252	2.2599e-07
P17844	33	K	Probable ATP-dependent RNA helicase DDX5 OS=Homo sapiens OX=9606 GN=DDX5 PE=1 SV=1	DDX5	1	0.0114461	85.533	K(1)FGNPGEK	2	0.64993	1	0.756	0.73	0.76	1.172	1.17	1.184	1.57	2.1671e-06
P17844	32	K	Probable ATP-dependent RNA helicase DDX5 OS=Homo sapiens OX=9606 GN=DDX5 PE=1 SV=1	DDX5	1	0.0170745	63.565	AGPLSGK(1)K	3	0.024839	1	0.82	0.87	0.876	1.061	1.154	1.091	1.288	0.00144396
P17844	45	K	Probable ATP-dependent RNA helicase DDX5 OS=Homo sapiens OX=9606 GN=DDX5 PE=1 SV=1	DDX5	1	0.0064221	68.657	K(1)WNLDELPK	3	0.20029	1	0.715	0.73	0.671	1.179	1.31	1.127	1.709	0.00047944
P17844	351	K	Probable ATP-dependent RNA helicase DDX5 OS=Homo sapiens OX=9606 GN=DDX5 PE=1 SV=1	DDX5	1	0.00120581	112.36	TIVFVETK(1)R	2	-0.61373	2	1.629	1.536	1.571	0.611	0.645	0.596	0.391	2.686e-06
P17844	236	K	Probable ATP-dependent RNA helicase DDX5 OS=Homo sapiens OX=9606 GN=DDX5 PE=1 SV=1	DDX5	1	2.70999e-22	162.67	LIDFLECGK(1)TNLR	2	-1.1504	2	1.097	1.039	1.218	0.971	0.893	0.915	0.829	0.024277
P17844	388	K	Probable ATP-dependent RNA helicase DDX5 OS=Homo sapiens OX=9606 GN=DDX5 PE=1 SV=1	DDX5	1	0.000447546	84.479	DWVLNEFK(1)HGK	4	-1.0961	2	1.043	1.028	0.948	1.033	0.966	1.01	0.997	0.94056
P17858	726	K	ATP-dependent 6-phosphofructokinase, liver type OS=Homo sapiens OX=9606 GN=PFKL PE=1 SV=6	PFKL	1	0.00142989	68.536	AVAFSPVTELK(1)K	3	-1.6947	1	1.05	0.985	0.956	1.059	0.961	1.008	1.012	0.7708
P17931	176	K	Galectin-3 OS=Homo sapiens OX=9606 GN=LGALS3 PE=1 SV=5	LGALS3	1	1.88323e-36	185.27	VIVCNTK(1)LDNNWGR	3	-0.86053	2	1.445	1.401	1.326	0.737	0.75	0.744	0.535	1.83783e-05
P17980	70	K	26S proteasome regulatory subunit 6A OS=Homo sapiens OX=9606 GN=PSMC3 PE=1 SV=3	PSMC3	1	0.00224072	67.252	VTHELQAMK(1)DK	3	1.0263	1	0.875	0.905	1.077	0.97	1.052	1.082	1.086	0.29918
P17980	56	K	26S proteasome regulatory subunit 6A OS=Homo sapiens OX=9606 GN=PSMC3 PE=1 SV=3	PSMC3	1	0.0100071	87.149	IMK(1)SEVLR	2	1.1313	1	1.047	0.892	1.014	1.04	0.974	1.04	1.034	0.54384
P17980	125	K	26S proteasome regulatory subunit 6A OS=Homo sapiens OX=9606 GN=PSMC3 PE=1 SV=3	PSMC3	1	0.00143165	104.05	CAVIK(1)TSTR	2	-2.0264	1	1.899	1.947	1.692	0.467	0.463	0.384	0.237	4.4152e-05
P17980	245	K	26S proteasome regulatory subunit 6A OS=Homo sapiens OX=9606 GN=PSMC3 PE=1 SV=3	PSMC3	1	1.931e-13	150.11	ACAAQTK(1)ATFLK	2	0.060852	2	1.561	1.511	1.576	0.622	0.649	0.638	0.411	4.732e-07
P17980	211	K	26S proteasome regulatory subunit 6A OS=Homo sapiens OX=9606 GN=PSMC3 PE=1 SV=3	PSMC3	1	2.71561e-05	101.39	EK(1)FENLGIQPPK	3	0.60515	1	0.921	0.841	0.863	1.051	1.085	1.132	1.245	0.0031551
P17987	109	K	T-complex protein 1 subunit alpha OS=Homo sapiens OX=9606 GN=TCP1 PE=1 SV=1	TCP1	1	0.00144127	107.06	NADELVK(1)QK	2	-0.2172	2	1.234	1.122	1.161	0.908	0.866	0.9	0.76	0.00095842
P17987	365	K	T-complex protein 1 subunit alpha OS=Homo sapiens OX=9606 GN=TCP1 PE=1 SV=1	TCP1	1	2.4956e-13	133.32	ICDDELILIK(1)NTK	3	-0.14546	1	1.156	1.221	1.192	0.867	0.876	0.889	0.737	6.1511e-05
P17987	510	K	T-complex protein 1 subunit alpha OS=Homo sapiens OX=9606 GN=TCP1 PE=1 SV=1	TCP1	1	0.000814654	84.753	QAGVFEPTIVK(1)VK	2	0.85869	2	1.018	1.016	0.963	1.032	0.991	0.999	1.008	0.71964
P17987	484	K	T-complex protein 1 subunit alpha OS=Homo sapiens OX=9606 GN=TCP1 PE=1 SV=1	TCP1	1	1.29121e-08	118.21	NLK(1)WIGLDLSNGKPR	3	-0.68854	2	1.033	1.026	1.089	0.942	1.018	0.956	0.926	0.064658
P17987	400	K	T-complex protein 1 subunit alpha OS=Homo sapiens OX=9606 GN=TCP1 PE=1 SV=1	TCP1	1	1.88427e-06	124.67	SLHDALCVVK(1)R	3	0.29094	2	1.218	1.077	1.254	0.881	0.944	0.825	0.747	0.0086444
P17987	153	K	T-complex protein 1 subunit alpha OS=Homo sapiens OX=9606 GN=TCP1 PE=1 SV=1	TCP1	1	2.8582e-05	69.261	DCLINAAK(1)TSMSSK	3	0.62694	1
P18065	207	K	Insulin-like growth factor-binding protein 2 OS=Homo sapiens OX=9606 GN=IGFBP2 PE=1 SV=2	IGFBP2	1	0.00370776	54.343	GGK(1)HHLGLEEPK	4	0.020273	1	0.27	0.255	0.265	1.49	1.426	1.586	5.699	4.9835e-07
P18065	216	K	Insulin-like growth factor-binding protein 2 OS=Homo sapiens OX=9606 GN=IGFBP2 PE=1 SV=2	IGFBP2	1	0.000564305	85.676	HHLGLEEPK(1)K	4	-0.036363	1	0.289	0.25	0.25	1.503	1.444	1.559	5.711	2.5698e-06
P18077	8	K	60S ribosomal protein L35a OS=Homo sapiens OX=9606 GN=RPL35A PE=1 SV=2	RPL35A	1	0.00191825	68.355	LWSK(1)AIFAGYK	3	-0.14577	1	0.9	0.962	0.941	1.05	1.024	1.072	1.122	0.0081005
P18077	52	K	60S ribosomal protein L35a OS=Homo sapiens OX=9606 GN=RPL35A PE=1 SV=2	RPL35A	1	0.00487401	98.458	CAYVYK(1)AK	2	-1.1318	1	1.079	1.128	1.192	0.886	0.989	0.871	0.808	0.012095
P18077	66	K	60S ribosomal protein L35a OS=Homo sapiens OX=9606 GN=RPL35A PE=1 SV=2	RPL35A	0.998236	1.97203e-07	108.66	NNTVTPGGK(0.002)PNK(0.998)TR	3	-0.56228	1	0.967	0.922	0.925	1.067	1.054	1.026	1.118	0.0043424
P18077	45	K	60S ribosomal protein L35a OS=Homo sapiens OX=9606 GN=RPL35A PE=1 SV=2	RPL35A	1	0.000343614	104.82	DETEFYLGK(1)R	2	0.67148	1	1.314	1.267	1.195	0.841	0.839	0.818	0.662	0.00014131
P18077	29	K	60S ribosomal protein L35a OS=Homo sapiens OX=9606 GN=RPL35A PE=1 SV=2	RPL35A	1	6.45383e-05	91.812	EHTALLK(1)IEGVYAR	3	0.68335	1	0.944	0.903	0.98	1.009	1.073	1.05	1.108	0.025944
P18124	104	K	60S ribosomal protein L7 OS=Homo sapiens OX=9606 GN=RPL7 PE=1 SV=1	RPL7	1	0.00269033	81.017	GINGVSPK(1)VR	2	-0.6358	1	0.816	0.76	0.781	1.211	1.091	1.153	1.466	0.0004774
P18124	161	K	60S ribosomal protein L7 OS=Homo sapiens OX=9606 GN=RPL7 PE=1 SV=1	RPL7	1	0.00640559	105.39	GYGK(1)INK	2	-0.4526	1	1.026	1.062	1.11	1.012	0.95	0.923	0.902	0.043644
P18124	53	K	60S ribosomal protein L7 OS=Homo sapiens OX=9606 GN=RPL7 PE=1 SV=1	RPL7	1	0.0152466	91.853	LIYEK(1)AK	2	0.4928	1	0.827	0.77	0.84	1.151	1.124	1.124	1.395	0.00028114
P18124	156	K	60S ribosomal protein L7 OS=Homo sapiens OX=9606 GN=RPL7 PE=1 SV=1	RPL7	1	0.0370244	60.691	SVNELIYK(1)R	2	-1.0466	1
P18124	202	K	60S ribosomal protein L7 OS=Homo sapiens OX=9606 GN=RPL7 PE=1 SV=1	RPL7	1	0.000554268	78.324	FK(1)EANNFLWPFK	3	-1.337	1	1.042	0.672	0.604	1.227	1.025	1.239	1.506	0.070921
P18124	59	K	60S ribosomal protein L7 OS=Homo sapiens OX=9606 GN=RPL7 PE=1 SV=1	RPL7	1	0.00617906	83.753	HYHK(1)EYR	3	0.3759	2	0.848	0.845	0.837	1.21	1.039	1.091	1.32	0.025715
P18124	19	K	60S ribosomal protein L7 OS=Homo sapiens OX=9606 GN=RPL7 PE=1 SV=1	RPL7	1	0.0033341	66.56	EVPAVPETLK(1)K	2	0.79975	2
P18124	29	K	60S ribosomal protein L7 OS=Homo sapiens OX=9606 GN=RPL7 PE=1 SV=1	RPL7	1	0.0111062	85.355	NFAELK(1)IK	3	1.3167	2	0.885	0.915	0.885	1.06	1.064	1.104	1.202	0.00042004
P18124	223	K	60S ribosomal protein L7 OS=Homo sapiens OX=9606 GN=RPL7 PE=1 SV=1	RPL7	1	2.59475e-29	179.94	K(1)TTHFVEGGDAGNREDQINR	3	-0.098351	4	0.789	0.778	0.693	1.183	1.144	1.19	1.556	0.00049647
P18206	992	K	Vinculin OS=Homo sapiens OX=9606 GN=VCL PE=1 SV=4	VCL	1	0.032044	57.175	GNDIIAAAK(1)R	2	0.6521	1	0.974	0.973	0.963	1.012	1.045	1.02	1.057	0.0056812
P18206	219	K	Vinculin OS=Homo sapiens OX=9606 GN=VCL PE=1 SV=4	VCL	1	0.000126014	100.11	NSK(1)NQGIEEALK	2	-0.040128	1	0.791	0.78	0.767	1.221	1.103	1.144	1.483	0.0002214
P18206	228	K	Vinculin OS=Homo sapiens OX=9606 GN=VCL PE=1 SV=4	VCL	1	9.83382e-05	103.44	NQGIEEALK(1)NR	2	-0.25919	1	1.003	0.961	0.952	1.004	1.049	1.022	1.055	0.06034
P18206	71	K	Vinculin OS=Homo sapiens OX=9606 GN=VCL PE=1 SV=4	VCL	1	1.39634e-05	104.81	ETVQTTEDQILK(1)R	3	0.22381	1	0.856	0.716	0.808	1.16	1.114	1.163	1.444	0.0024429
P18206	496	K	Vinculin OS=Homo sapiens OX=9606 GN=VCL PE=1 SV=4	VCL	1	1.07011e-07	112.42	AAVHLEGK(1)IEQAQR	3	-1.5515	1	1.158	1.177	1.01	0.956	0.916	0.917	0.834	0.023662
P18206	731	K	Vinculin OS=Homo sapiens OX=9606 GN=VCL PE=1 SV=4	VCL	1	3.23241e-10	135.99	SLLDASEEAIK(1)K	3	0.53949	1	1.232	1.098	1.229	0.808	0.936	0.896	0.742	0.006638
P18206	316	K	Vinculin OS=Homo sapiens OX=9606 GN=VCL PE=1 SV=4	VCL	1	0.0100094	72.34	VGELCAGK(1)ER	2	-1.6995	1	1.722	1.618	1.478	0.627	0.582	0.593	0.374	3.9318e-05
P18564	548	K	Integrin beta-6 OS=Homo sapiens OX=9606 GN=ITGB6 PE=1 SV=2	ITGB6	1	9.92231e-07	77.037	HK(1)GLLCGGNGDCDCGECVCR	3	-0.47256	1	0.5	0.688	0.699	1.2	1.299	1.258	1.991	0.0032991
P18583	2055	K	Protein SON OS=Homo sapiens OX=9606 GN=SON PE=1 SV=4	SON	1	1.0778e-22	159.34	LTDLDK(1)AQLLEIAK	2	-0.73162	2	0.955	0.934	0.875	1.072	1.031	1.074	1.149	0.0089834
P18621	27	K	60S ribosomal protein L17 OS=Homo sapiens OX=9606 GN=RPL17 PE=1 SV=3	RPL17	1	0.014601	68.915	VHFK(1)NTR	3	-0.030041	1	1.121	1.044	0.927	0.94	0.941	1.073	0.955	0.5628
P18621	74	K	60S ribosomal protein L17 OS=Homo sapiens OX=9606 GN=RPL17 PE=1 SV=3	RPL17	1	0.00914701	48.527	CAQAK(1)QWGWTQGR	3	0.32756	1
P18621	13	K	60S ribosomal protein L17 OS=Homo sapiens OX=9606 GN=RPL17 PE=1 SV=3	RPL17	1	1.8922e-28	174.24	YSLDPENPTK(1)SCK	2	-0.23348	4	1.479	1.479	1.469	0.697	0.682	0.679	0.465	4.3289e-08
P18621	86	K	60S ribosomal protein L17 OS=Homo sapiens OX=9606 GN=RPL17 PE=1 SV=3	RPL17	1	0.00435077	64.121	K(1)SAEFLLHMLK	3	0.77912	1	0.927	1.044	0.888	1.004	1.054	1.053	1.088	0.164738
P18669	251	K	Phosphoglycerate mutase 1 OS=Homo sapiens OX=9606 GN=PGAM1 PE=1 SV=2	PGAM1	1	2.74131e-06	110.38	AMEAVAAQGK(1)AK	2	-1.348	2	0.875	0.875	0.927	1.115	1.105	1.017	1.209	0.0056614
P18669	106	K	Phosphoglycerate mutase 1 OS=Homo sapiens OX=9606 GN=PGAM1 PE=1 SV=2	PGAM1	1	3.24793e-13	141.59	AETAAK(1)HGEAQVK	4	-0.28204	3	0.903	0.853	0.885	1.118	1.078	1.067	1.236	0.00064016
P18669	100	K	Phosphoglycerate mutase 1 OS=Homo sapiens OX=9606 GN=PGAM1 PE=1 SV=2	PGAM1	1	1.97868e-12	123.76	HYGGLTGLNK(1)AETAAK	4	-0.50082	6	0.457	0.452	0.458	1.395	1.414	1.312	3.015	6.0532e-07
P18669	113	K	Phosphoglycerate mutase 1 OS=Homo sapiens OX=9606 GN=PGAM1 PE=1 SV=2	PGAM1	1	5.77422e-05	94.309	HGEAQVK(1)IWR	3	-1.8949	1	0.782	0.943	1.068	1.014	1.078	1.054	1.126	0.24158
P18754	19	K	Regulator of chromosome condensation OS=Homo sapiens OX=9606 GN=RCC1 PE=1 SV=1	RCC1	1	0.00499437	58.274	SPPADAIPK(1)SK	2	0.2522	2	0.818	0.834	0.853	1.123	1.147	1.08	1.337	0.000175005
P18858	282	K	DNA ligase 1 OS=Homo sapiens OX=9606 GN=LIG1 PE=1 SV=1	LIG1	1	0.0001454	67.326	NNYHPVEDACWK(1)PGQK	3	-1.4027	1	1.469	1.375	1.424	0.714	0.758	0.694	0.507	3.5094e-05
P18859	99	K	ATP synthase-coupling factor 6, mitochondrial OS=Homo sapiens OX=9606 GN=ATP5PF PE=1 SV=1	ATP5PF	0.999985	0.000784576	64.476	FEDPK(1)FEVIEKPQA	3	-2.8447	1	0.871	0.922	0.865	1.129	1.056	1.064	1.222	0.0023603
P18859	41	K	ATP synthase-coupling factor 6, mitochondrial OS=Homo sapiens OX=9606 GN=ATP5PF PE=1 SV=1	ATP5PF	1	0.00266425	60.157	ELDPIQK(1)LFVDK	3	0.11428	1	0.828	1.001	1.006	1.004	1.082	1.036	1.101	0.2136
P18887	298	K	DNA repair protein XRCC1 OS=Homo sapiens OX=9606 GN=XRCC1 PE=1 SV=2	XRCC1	1	0.000293799	101.35	AQGAVTGK(1)PR	2	-0.49374	1	1.192	1.167	1.181	0.894	0.899	0.864	0.751	3.599e-05
P19075	187	K	Tetraspanin-8 OS=Homo sapiens OX=9606 GN=TSPAN8 PE=1 SV=1	TSPAN8	1	0.000435916	70.889	QRPCQSYNGK(1)QVYK	3	0.12505	1	0.819	0.91	0.737	1.152	1.1	1.126	1.37	0.0069551
P19105	163	K	Myosin regulatory light chain 12A OS=Homo sapiens OX=9606 GN=MYL12A PE=1 SV=2	MYL12A	1	0.00684026	81.297	ILK(1)HGAK	3	-1.0636	1	1.138	1.072	1.027	0.945	0.91	1.004	0.883	0.039736
P19224	88	K	UDP-glucuronosyltransferase 1-6 OS=Homo sapiens OX=9606 GN=UGT1A6 PE=1 SV=2	UGT1A6	1	1.59069e-05	104.81	IYPVPYDQEELK(1)NR	3	-2.0388	3	0.949	0.928	0.981	1.102	1.031	0.986	1.091	0.074542
P19224	468	K	UDP-glucuronosyltransferase 1-6 OS=Homo sapiens OX=9606 GN=UGT1A6 PE=1 SV=2	UGT1A6	1	0.0161643	58.596	HK(1)GAPHLR	3	-0.27472	1	0.793	0.856	0.836	1.107	1.156	1.099	1.353	0.00039582
P19338	398	K	Nucleolin OS=Homo sapiens OX=9606 GN=NCL PE=1 SV=3	NCL	1	0.000348885	106.62	TLLAK(1)NLPYK	2	-0.4972	1	0.736	0.784	0.796	1.121	1.155	1.196	1.499	0.000182017
P19338	124	K	Nucleolin OS=Homo sapiens OX=9606 GN=NCL PE=1 SV=3	NCL	1	0.0029645	79.148	ALVATPGK(1)K	2	0.32798	2	1.348	1.279	1.228	0.801	0.82	0.823	0.634	8.3676e-05
P19338	646	K	Nucleolin OS=Homo sapiens OX=9606 GN=NCL PE=1 SV=3	NCL	1	0.00357515	85.355	VTLDWAK(1)PK	2	0.070724	2	1.05	1.079	0.954	0.969	1.004	0.989	0.961	0.3735
P19338	70	K	Nucleolin OS=Homo sapiens OX=9606 GN=NCL PE=1 SV=3	NCL	1	0.0283549	72.928	VVVSPTK(1)K	2	-0.43177	1	0.911	0.838	0.892	1.065	1.122	1.073	1.234	0.0021243
P19338	79	K	Nucleolin OS=Homo sapiens OX=9606 GN=NCL PE=1 SV=3	NCL	1	0.00145772	94.309	VAVATPAK(1)K	3	-0.31754	2	0.976	1.044	0.987	1.04	0.984	0.99	1.002	0.93254
P19338	324	K	Nucleolin OS=Homo sapiens OX=9606 GN=NCL PE=1 SV=3	NCL	1	6.52955e-05	90.707	SAPELK(1)TGISDVFAK	3	1.7062	1	1.072	0.77	0.808	0.964	1.162	1.129	1.228	0.146062
P19338	294	K	Nucleolin OS=Homo sapiens OX=9606 GN=NCL PE=1 SV=3	NCL	1	0.042482	75.109	AAPEAK(1)K	2	0.16638	1	0.94	1.035	0.899	1.091	1.021	0.993	1.08	0.193082
P19338	521	K	Nucleolin OS=Homo sapiens OX=9606 GN=NCL PE=1 SV=3	NCL	1	0.000399298	122.69	VPQNQNGK(1)SK	2	1.6607	1	1.037	0.99	1.033	0.972	1.004	1.002	0.973	0.21102
P19338	513	K	Nucleolin OS=Homo sapiens OX=9606 GN=NCL PE=1 SV=3	NCL	1	0.000256952	88.021	ATFIK(1)VPQNQNGK	4	-0.13444	2	0.976	0.817	0.743	1.16	1.05	1.128	1.316	0.030275
P19338	403	K	Nucleolin OS=Homo sapiens OX=9606 GN=NCL PE=1 SV=3	NCL	1	4.77832e-18	164.53	NLPYK(1)VTQDELK	2	0.24057	2	0.852	0.822	0.85	1.1	1.129	1.11	1.323	3.7763e-05
P19338	572	K	Nucleolin OS=Homo sapiens OX=9606 GN=NCL PE=1 SV=3	NCL	1	0.000245661	96.745	SQPSK(1)TLFVK	3	-2.526	2
P19338	95	K	Nucleolin OS=Homo sapiens OX=9606 GN=NCL PE=1 SV=3	NCL	1	0.0229341	76.1	AAATPAK(1)K	2	-0.76821	1	1.148	1.116	1.19	0.834	0.835	1.035	0.783	0.028085
P19338	577	K	Nucleolin OS=Homo sapiens OX=9606 GN=NCL PE=1 SV=3	NCL	1	2.36474e-26	147.09	TLFVK(1)GLSEDTTEETLK	3	0.64862	1	0.915	0.908	0.812	1.107	1.091	1.07	1.24	0.0055414
P19338	228	K	Nucleolin OS=Homo sapiens OX=9606 GN=NCL PE=1 SV=3	NCL	1	0.016191	84.244	VVPVK(1)AK	3	-0.22022	2	1.186	1.212	1.197	0.899	0.834	0.884	0.728	0.000177611
P19338	429	K	Nucleolin OS=Homo sapiens OX=9606 GN=NCL PE=1 SV=3	NCL	1	0.000221587	94.122	SK(1)GIAYIEFK	2	0.2136	2	0.862	0.916	0.932	1.11	1.047	1.056	1.186	0.0046606
P19338	377	K	Nucleolin OS=Homo sapiens OX=9606 GN=NCL PE=1 SV=3	NCL	0.94808	0.00861415	46.88	VFGNEIK(0.948)LEK(0.052)PK	3	0.63674	1
P19338	545	K	Nucleolin OS=Homo sapiens OX=9606 GN=NCL PE=1 SV=3	NCL	1	4.9615e-05	136.49	EALNSCNK(1)R	3	0.17238	5	1.466	1.461	1.376	0.712	0.722	0.709	0.498	2.6011e-06
P19338	477	K	Nucleolin OS=Homo sapiens OX=9606 GN=NCL PE=1 SV=3	NCL	1	2.25548e-07	124.62	GGK(1)NSTWSGESK	2	0.24609	2	1.05	1.033	1.055	0.966	0.964	0.995	0.932	0.0042955
P19388	15	K	DNA-directed RNA polymerases I, II, and III subunit RPABC1 OS=Homo sapiens OX=9606 GN=POLR2E PE=1 SV=4	POLR2E	1	0.00012843	93.345	K(1)TIMQLCHDR	3	-1.2139	1	1	1.044	1.211	0.851	0.982	1.003	0.871	0.152359
P19404	68	K	NADH dehydrogenase [ubiquinone] flavoprotein 2, mitochondrial OS=Homo sapiens OX=9606 GN=NDUFV2 PE=1 SV=2	NDUFV2	1	0.00024157	83.087	IEAIVK(1)NYPEGHK	4	0.57393	2	0.967	0.869	1.039	0.984	1.161	0.957	1.079	0.39946
P19525	408	K	Interferon-induced, double-stranded RNA-activated protein kinase OS=Homo sapiens OX=9606 GN=EIF2AK2 PE=1 SV=2	EIF2AK2	1	0.0368581	46.001	GVDYIHSK(1)K	3	-0.3369	1	0.959	0.967	0.98	1.072	1.017	0.995	1.061	0.062322
P19525	256	K	Interferon-induced, double-stranded RNA-activated protein kinase OS=Homo sapiens OX=9606 GN=EIF2AK2 PE=1 SV=2	EIF2AK2	1	0.0284367	72.2	ETK(1)YTVDK	2	-2.3304	1	0.723	0.803	0.795	1.143	1.189	1.139	1.495	0.00036388
P19525	299	K	Interferon-induced, double-stranded RNA-activated protein kinase OS=Homo sapiens OX=9606 GN=EIF2AK2 PE=1 SV=2	EIF2AK2	1	0.0188235	88.37	VK(1)YNNEK	2	-0.41744	1	1.067	0.973	0.97	0.938	1.106	0.967	1	0.9839
P20042	216	K	Eukaryotic translation initiation factor 2 subunit 2 OS=Homo sapiens OX=9606 GN=EIF2S2 PE=1 SV=2	EIF2S2	1	0.000218326	90.412	K(1)TSFVNFTDICK	3	0.056856	1	0.87	0.984	1.01	1.006	1.233	0.869	1.085	0.54548
P20042	227	K	Eukaryotic translation initiation factor 2 subunit 2 OS=Homo sapiens OX=9606 GN=EIF2S2 PE=1 SV=2	EIF2S2	1	0.000158926	85.006	TSFVNFTDICK(1)LLHR	3	-1.1166	1	1.043	0.961	0.977	1.048	1.014	0.974	1.018	0.60314
P20042	199	K	Eukaryotic translation initiation factor 2 subunit 2 OS=Homo sapiens OX=9606 GN=EIF2S2 PE=1 SV=2	EIF2S2	1	0.000268168	88.282	EKNPDMVAGEK(1)R	3	0.079908	1	0.949	0.994	0.947	1.007	0.989	1.092	1.069	0.128635
P20618	104	K	Proteasome subunit beta type-1 OS=Homo sapiens OX=9606 GN=PSMB1 PE=1 SV=2	PSMB1	1	0.000520675	118.74	MYK(1)HSNNK	3	-0.42772	3	0.887	0.856	0.89	1.147	1.05	1.071	1.241	0.00187723
P20618	73	K	Proteasome subunit beta type-1 OS=Homo sapiens OX=9606 GN=PSMB1 PE=1 SV=2	PSMB1	1	0.0215894	85.676	CYK(1)LTDK	2	-0.65228	1	1.177	1.256	1.183	0.769	1.174	0.661	0.72	0.174322
P20674	113	K	Cytochrome c oxidase subunit 5A, mitochondrial OS=Homo sapiens OX=9606 GN=COX5A PE=1 SV=2	COX5A	1	0.00310268	107.79	ILEVVK(1)DK	2	0.50735	1	1.068	1.083	0.994	1.055	0.884	0.987	0.93	0.27046
P20700	109	K	Lamin-B1 OS=Homo sapiens OX=9606 GN=LMNB1 PE=1 SV=2	LMNB1	1	0.00277252	88.596	LQIELGK(1)CK	2	0.30683	1	0.864	0.915	0.961	1.049	1.049	1.091	1.164	0.0103022
P20700	271	K	Lamin-B1 OS=Homo sapiens OX=9606 GN=LMNB1 PE=1 SV=2	LMNB1	1	4.47788e-09	118.31	EELEQTYHAK(1)LENAR	3	-0.5496	3	0.906	1.034	0.946	1.022	1.011	1.057	1.071	0.165781
P20700	123	K	Lamin-B1 OS=Homo sapiens OX=9606 GN=LMNB1 PE=1 SV=2	LMNB1	1	3.39644e-05	101.39	AEHDQLLLNYAK(1)K	3	-1.2132	1	0.995	0.96	0.955	0.979	1.094	1.004	1.057	0.20246
P20700	532	K	Lamin-B1 OS=Homo sapiens OX=9606 GN=LMNB1 PE=1 SV=2	LMNB1	1	2.42251e-11	131.4	VILK(1)NSQGEEVAQR	2	-0.12624	1	0.871	0.959	0.896	1.115	1.08	1.01	1.176	0.016584
P20810	64	K	Calpastatin OS=Homo sapiens OX=9606 GN=CAST PE=1 SV=4	CAST	1	0.00144738	77.662	EHTEPK(1)SLPK	3	-1.9388	1	0.95	0.883	0.903	1.048	1.039	1.107	1.167	0.0061979
P20810	250	K	Calpastatin OS=Homo sapiens OX=9606 GN=CAST PE=1 SV=4	CAST	0.936534	0.0139715	49.483	K(0.937)TEK(0.063)EESTEVLK	3	0.25083	1	0.843	0.875	0.867	1.055	1.064	1.173	1.274	0.0025554
P21127	120	K	Cyclin-dependent kinase 11B OS=Homo sapiens OX=9606 GN=CDK11B PE=1 SV=4	CDK11B	1	1.68486e-05	106.4	SHSAEGGK(1)HAR	3	0.68318	1	0.488	1.009	0.555	1.058	1.431	1.151	1.774	0.062619
P21127	225	K	Cyclin-dependent kinase 11B OS=Homo sapiens OX=9606 GN=CDK11B PE=1 SV=4	CDK11B	1	0.0320036	70.028	EDYSDK(1)VK	2	-0.78313	1	0.639	0.669	0.744	1.266	1.248	1.145	1.783	0.00045797
P21127	551	K	Cyclin-dependent kinase 11B OS=Homo sapiens OX=9606 GN=CDK11B PE=1 SV=4	CDK11B	1	0.000477158	67.519	GVK(1)HLHDNWILHR	5	-1.421	1	1.171	0.76	0.949	1.117	0.791	1.201	1.08	0.69324
P21266	54	K	Glutathione S-transferase Mu 3 OS=Homo sapiens OX=9606 GN=GSTM3 PE=1 SV=3	GSTM3	1	0.00312209	87.184	SQWLDVK(1)FK	2	1.6013	2	0.965	1.037	0.958	0.971	1.062	1.009	1.028	0.49314
P21281	109	K	V-type proton ATPase subunit B, brain isoform OS=Homo sapiens OX=9606 GN=ATP6V1B2 PE=1 SV=3	ATP6V1B2	1	0.000924525	87.718	K(1)TSCEFTGDILR	3	-0.37516	3	1.482	1.45	1.439	0.716	0.687	0.694	0.48	5.5611e-07
P21281	64	K	V-type proton ATPase subunit B, brain isoform OS=Homo sapiens OX=9606 GN=ATP6V1B2 PE=1 SV=3	ATP6V1B2	1	2.66387e-08	113.86	TVSGVNGPLVILDHVK(1)FPR	3	-0.37355	1	1.025	1.081	0.982	0.949	1.048	0.961	0.958	0.35928
P21281	108	K	V-type proton ATPase subunit B, brain isoform OS=Homo sapiens OX=9606 GN=ATP6V1B2 PE=1 SV=3	ATP6V1B2	1	1.83584e-08	108.14	AVVQVFEGTSGIDAK(1)K	3	0.31694	1	1.399	1.378	1.407	0.809	0.702	0.715	0.532	0.0050152
P21283	21	K	V-type proton ATPase subunit C 1 OS=Homo sapiens OX=9606 GN=ATP6V1C1 PE=1 SV=4	ATP6V1C1	1	0.00452542	50.178	TCQQTWEK(1)LHAATSK	3	-1.8965	1	1.072	0.96	1.046	1.02	1.072	0.88	0.966	0.6119
P21291	137	K	Cysteine and glycine-rich protein 1 OS=Homo sapiens OX=9606 GN=CSRP1 PE=1 SV=3	CSRP1	1	0.000778058	80.688	VIGAGK(1)SWHK	3	-1.0084	1	0.869	0.841	1.045	0.998	1.129	1.049	1.153	0.129815
P21291	42	K	Cysteine and glycine-rich protein 1 OS=Homo sapiens OX=9606 GN=CSRP1 PE=1 SV=3	CSRP1	1	5.05798e-14	123.55	K(1)NLDSTTVAVHGEEIYCK	3	-1.3832	1	1.011	1.045	0.972	0.967	0.987	1.042	0.989	0.74434
P21291	173	K	Cysteine and glycine-rich protein 1 OS=Homo sapiens OX=9606 GN=CSRP1 PE=1 SV=3	CSRP1	1	0.00053479	83.948	GCYAK(1)NFGPK	3	-0.47449	1	0.873	0.916	0.823	1.072	1.188	1.02	1.256	0.0141838
P21291	91	K	Cysteine and glycine-rich protein 1 OS=Homo sapiens OX=9606 GN=CSRP1 PE=1 SV=3	CSRP1	1	0.00146704	50.783	GESLGIK(1)HEEAPGHRPTTNPNASK	5	-1.2271	1	0.919	0.819	1.035	0.896	1.053	1.209	1.139	0.31148
P21333	578	K	Filamin-A OS=Homo sapiens OX=9606 GN=FLNA PE=1 SV=4	FLNA	1	0.000120036	101.56	VGTECGNQK(1)VR	2	-0.21816	1	1.73	1.815	1.784	0.486	0.476	0.485	0.272	6.0056e-08
P21333	2217	K	Filamin-A OS=Homo sapiens OX=9606 GN=FLNA PE=1 SV=4	FLNA	1	0.00135018	50.271	YK(1)GQHVPGSPFQFTVGPLGEGGAHK	4	-0.74035	1	1.117	0.851	1.037	0.929	0.954	1.129	1.002	0.9632
P21333	1450	K	Filamin-A OS=Homo sapiens OX=9606 GN=FLNA PE=1 SV=4	FLNA	1	0.00011233	90.793	VPVHDVTDASK(1)VK	3	0.48724	1	1.479	1.441	1.393	0.691	0.679	0.764	0.495	6.2437e-05
P21333	2024	K	Filamin-A OS=Homo sapiens OX=9606 GN=FLNA PE=1 SV=4	FLNA	1	2.01287e-05	106.62	ETGEHLVHVK(1)K	4	0.086125	1	0.899	0.783	0.852	1.076	1.058	1.196	1.314	0.0079419
P21333	1294	K	Filamin-A OS=Homo sapiens OX=9606 GN=FLNA PE=1 SV=4	FLNA	1	0.000496864	70.438	ALTQTGGPHVK(1)AR	3	0.0084154	1	0.979	0.908	0.919	1.034	1.032	1.083	1.122	0.0148022
P21333	994	K	Filamin-A OS=Homo sapiens OX=9606 GN=FLNA PE=1 SV=4	FLNA	1	0.00346172	85.813	DQEFTVK(1)SK	3	-0.051795	2	0.786	0.743	0.763	1.155	1.183	1.157	1.525	1.9772e-05
P21333	2000	K	Filamin-A OS=Homo sapiens OX=9606 GN=FLNA PE=1 SV=4	FLNA	1	0.0408648	66.692	EEPCLLK(1)R	2	-0.50213	1	1.675	1.62	1.586	0.582	0.588	0.583	0.359	1.8799e-07
P21333	2607	K	Filamin-A OS=Homo sapiens OX=9606 GN=FLNA PE=1 SV=4	FLNA	1	0.00107128	58.079	TPCEEILVK(1)HVGSR	3	-0.55366	1	0.87	0.892	0.891	1.07	1.086	1.093	1.225	3.9628e-05
P21333	781	K	Filamin-A OS=Homo sapiens OX=9606 GN=FLNA PE=1 SV=4	FLNA	1	0.0177742	44.612	VYGPGVAK(1)TGLK	3	0.064808	1	0.806	0.86	0.841	1.173	1.018	1.159	1.336	0.0042389
P21399	56	K	Cytoplasmic aconitate hydratase OS=Homo sapiens OX=9606 GN=ACO1 PE=1 SV=3	ACO1	1	0.00145925	94.767	NCDEFLVK(1)K	2	-0.80071	1	1.345	1.425	1.377	0.744	0.774	0.726	0.541	1.82554e-05
P21796	109	K	Voltage-dependent anion-selective channel protein 1 OS=Homo sapiens OX=9606 GN=VDAC1 PE=1 SV=2	VDAC1	1	0.000836343	83.633	LTFDSSFSPNTGK(1)K	3	0.68928	2	0.99	0.899	1.037	1.056	1.014	1.001	1.05	0.33038
P21796	34	K	Voltage-dependent anion-selective channel protein 1 OS=Homo sapiens OX=9606 GN=VDAC1 PE=1 SV=2	VDAC1	1	2.57591e-22	135.98	TK(1)SENGLEFTSSGSANTETTK	3	-0.82579	2	0.742	0.766	0.842	1.257	1.08	1.122	1.472	0.0028805
P21796	61	K	Voltage-dependent anion-selective channel protein 1 OS=Homo sapiens OX=9606 GN=VDAC1 PE=1 SV=2	VDAC1	1	0.00011548	117.25	VTGSLETK(1)YR	3	1.0352	3	0.663	0.636	0.677	1.244	1.244	1.221	1.877	2.673e-06
P21796	266	K	Voltage-dependent anion-selective channel protein 1 OS=Homo sapiens OX=9606 GN=VDAC1 PE=1 SV=2	VDAC1	1	2.63788e-05	84.41	LTLSALLDGK(1)NVNAGGHK	4	1.5231	1	0.797	0.979	0.795	1.227	1.109	0.978	1.289	0.055642
P21796	20	K	Voltage-dependent anion-selective channel protein 1 OS=Homo sapiens OX=9606 GN=VDAC1 PE=1 SV=2	VDAC1	1	5.63016e-11	131.66	DVFTK(1)GYGFGLIK	2	0.76596	2	0.765	0.794	0.754	1.198	1.157	1.128	1.506	6.0692e-05
P21912	123	K	Succinate dehydrogenase [ubiquinone] iron-sulfur subunit, mitochondrial OS=Homo sapiens OX=9606 GN=SDHB PE=1 SV=3	SDHB	1	0.0049617	78.324	IDTNLNK(1)VSK	2	-0.098309	1	0.869	0.938	0.869	0.975	1.011	1.238	1.205	0.082179
P21926	170	K	CD9 antigen OS=Homo sapiens OX=9606 GN=CD9 PE=1 SV=4	CD9	1	4.34919e-05	122.39	K(1)DVLETFTVK	2	-0.27494	1	1.026	0.978	0.974	0.944	1.06	1.026	1.017	0.69064
P21926	131	K	CD9 antigen OS=Homo sapiens OX=9606 GN=CD9 PE=1 SV=4	CD9	1	0.0375299	76.478	DTYNK(1)LK	2	-2.4544	1
P21964	159	K	Catechol O-methyltransferase OS=Homo sapiens OX=9606 GN=COMT PE=1 SV=2	COMT	1	0.0239406	45.653	MVDFAGVK(1)DK	3	-0.69478	1	0.942	1.006	0.995	1.033	0.976	1.042	1.037	0.28026
P22087	84	K	rRNA 2'-O-methyltransferase fibrillarin OS=Homo sapiens OX=9606 GN=FBL PE=1 SV=2	FBL	1	1.54279e-07	109.07	GNQSGK(1)NVMVEPHR	3	0.046644	1	0.686	0.867	0.892	1.277	0.999	1.116	1.387	0.039601
P22087	205	K	rRNA 2'-O-methyltransferase fibrillarin OS=Homo sapiens OX=9606 GN=FBL PE=1 SV=2	FBL	1	0.00441888	101.65	DLINLAK(1)K	2	-1.1492	1	0.962	1.061	0.95	0.903	0.92	1.199	1.016	0.9315
P22087	102	K	rRNA 2'-O-methyltransferase fibrillarin OS=Homo sapiens OX=9606 GN=FBL PE=1 SV=2	FBL	1	0.006593	64.82	GK(1)EDALVTK	3	0.56476	1	1.614	1.463	1.488	0.653	0.625	0.69	0.431	3.7804e-05
P22087	121	K	rRNA 2'-O-methyltransferase fibrillarin OS=Homo sapiens OX=9606 GN=FBL PE=1 SV=2	FBL	1	0.000918624	83.692	NLVPGESVYGEK(1)R	3	-0.33313	2	0.843	0.966	0.972	1.072	1.071	1.019	1.137	0.057764
P22102	219	K	Trifunctional purine biosynthetic protein adenosine-3 OS=Homo sapiens OX=9606 GN=GART PE=1 SV=1	GART	1	0.000143354	91.202	TVAPMPPAQDHK(1)R	3	0.082493	1	1.081	1.429	1.05	0.789	0.849	0.989	0.738	0.06568
P22102	162	K	Trifunctional purine biosynthetic protein adenosine-3 OS=Homo sapiens OX=9606 GN=GART PE=1 SV=1	GART	1	0.00700052	87.476	GVIVAK(1)SK	2	-0.25976	2	1.559	1.531	1.49	0.669	0.664	0.624	0.427	2.4813e-06
P22102	164	K	Trifunctional purine biosynthetic protein adenosine-3 OS=Homo sapiens OX=9606 GN=GART PE=1 SV=1	GART	1	0.00633056	105.52	SK(1)EEACK	2	-0.90208	1	1.917	1.882	1.877	0.398	0.392	0.426	0.214	2.5844e-07
P22102	866	K	Trifunctional purine biosynthetic protein adenosine-3 OS=Homo sapiens OX=9606 GN=GART PE=1 SV=1	GART	1	0.0120548	64.265	VINHK(1)LYK	3	0.39201	1	0.954	0.949	0.964	0.994	1.157	0.957	1.084	0.3151
P22102	107	K	Trifunctional purine biosynthetic protein adenosine-3 OS=Homo sapiens OX=9606 GN=GART PE=1 SV=1	GART	1	1.73931e-22	140.95	SAGVQCFGPTAEAAQLESSK(1)R	3	-1.569	1	0.891	1.056	0.948	0.978	0.979	1.123	1.064	0.4091
P22102	404	K	Trifunctional purine biosynthetic protein adenosine-3 OS=Homo sapiens OX=9606 GN=GART PE=1 SV=1	GART	1	7.56257e-18	160.78	ENLISALEEAK(1)K	2	-0.40371	2	0.899	0.871	0.926	1.106	1.028	1.09	1.196	0.0033012
P22234	261	K	Multifunctional protein ADE2 OS=Homo sapiens OX=9606 GN=PAICS PE=1 SV=3	PAICS	1	4.38739e-08	131.35	VELLLK(1)SESQCR	2	0.74767	2	1.211	1.256	1.276	0.819	0.854	0.842	0.672	3.8041e-05
P22234	53	K	Multifunctional protein ADE2 OS=Homo sapiens OX=9606 GN=PAICS PE=1 SV=3	PAICS	1	0.000192329	89.231	NHLEGK(1)AAISNK	3	1.6765	1	1.074	1.034	1.08	0.938	0.998	0.955	0.907	0.0129575
P22234	286	K	Multifunctional protein ADE2 OS=Homo sapiens OX=9606 GN=PAICS PE=1 SV=3	PAICS	1	2.20743e-08	119.87	K(1)ACGNFGIPCELR	2	-2.213	1	1.354	1.511	1.298	0.761	0.735	0.738	0.537	0.000181891
P22234	120	K	Multifunctional protein ADE2 OS=Homo sapiens OX=9606 GN=PAICS PE=1 SV=3	PAICS	1	0.0299455	44.318	EGYK(1)FYPPK	3	1.4105	1
P22234	47	K	Multifunctional protein ADE2 OS=Homo sapiens OX=9606 GN=PAICS PE=1 SV=3	PAICS	1	0.0385605	76.679	K(1)NHLEGK	2	0.64054	1	1.07	1.032	1.104	1.05	0.869	0.966	0.9	0.136355
P22307	453	K	Non-specific lipid-transfer protein OS=Homo sapiens OX=9606 GN=SCP2 PE=1 SV=2	SCP2	1	0.000853719	75.589	KLEEEGEQFVK(1)K	3	0.4853	1	0.883	0.904	0.895	1.022	1.056	1.148	1.203	0.0065029
P22314	296	K	Ubiquitin-like modifier-activating enzyme 1 OS=Homo sapiens OX=9606 GN=UBA1 PE=1 SV=3	UBA1	1	0.000600771	81.017	GGIVSQVK(1)VPK	2	0.16062	2	1.011	0.917	1.026	1.113	0.924	1.02	1.035	0.63852
P22314	526	K	Ubiquitin-like modifier-activating enzyme 1 OS=Homo sapiens OX=9606 GN=UBA1 PE=1 SV=3	UBA1	1	0.00278713	110.88	PWDVTK(1)LK	2	-1.5518	1	1.26	1.234	1.034	0.902	0.767	0.996	0.755	0.045797
P22314	528	K	Ubiquitin-like modifier-activating enzyme 1 OS=Homo sapiens OX=9606 GN=UBA1 PE=1 SV=3	UBA1	1	0.000433641	84.821	LK(1)SDTAAAAVR	3	-0.28807	2	1.068	0.926	0.871	0.99	1.099	1.021	1.086	0.27984
P22314	593	K	Ubiquitin-like modifier-activating enzyme 1 OS=Homo sapiens OX=9606 GN=UBA1 PE=1 SV=3	UBA1	1	0.00199373	79.346	K(1)PLLESGTLGTK	3	1.3268	2	1.393	1.176	1.13	0.816	0.87	0.868	0.69	0.0055643
P22314	980	K	Ubiquitin-like modifier-activating enzyme 1 OS=Homo sapiens OX=9606 GN=UBA1 PE=1 SV=3	UBA1	1	0.000551859	81.92	QFLDYFK(1)TEHK	3	0.21195	1	0.862	0.862	0.846	1.062	1.145	1.098	1.286	0.00037824
P22314	671	K	Ubiquitin-like modifier-activating enzyme 1 OS=Homo sapiens OX=9606 GN=UBA1 PE=1 SV=3	UBA1	1	0.00348959	46.962	QPAENVNQYLTDPK(1)FVER	3	0.30957	1	0.875	0.96	0.949	1.118	1.064	0.982	1.136	0.055922
P22392	124	K	Nucleoside diphosphate kinase B OS=Homo sapiens OX=9606 GN=NME2 PE=1 SV=1	NME2	1	0.000258808	71.879	NIIHGSDSVK(1)SAEK	3	-1.4986	2	0.816	1.009	1.02	1.11	0.964	1.046	1.097	0.3147
P22392	56	K	Nucleoside diphosphate kinase B OS=Homo sapiens OX=9606 GN=NME2 PE=1 SV=1	NME2	1	0.0353512	57.885	QHYIDLK(1)DR	3	-0.39452	2	0.761	0.776	0.805	1.214	1.022	1.225	1.478	0.0031843
P22392	49	K	Nucleoside diphosphate kinase B OS=Homo sapiens OX=9606 GN=NME2 PE=1 SV=1	NME2	1	5.80827e-06	103.88	ASEEHLK(1)QHYIDLK	3	0.29321	4	0.782	0.732	0.823	1.205	1.149	1.114	1.484	0.00064014
P22392	26	K	Nucleoside diphosphate kinase B OS=Homo sapiens OX=9606 GN=NME2 PE=1 SV=1	NME2	1	0.00158358	93.649	GLVGEIIK(1)R	2	-0.62818	2	1.013	0.933	0.987	0.952	1.053	1.055	1.043	0.37272
P22392	12	K	Nucleoside diphosphate kinase B OS=Homo sapiens OX=9606 GN=NME2 PE=1 SV=1	NME2	1	0.000851714	88.075	TFIAIK(1)PDGVQR	3	-1.4628	2	0.966	0.964	1.061	1.003	1.089	0.932	1.011	0.86504
P22392	31	K	Nucleoside diphosphate kinase B OS=Homo sapiens OX=9606 GN=NME2 PE=1 SV=1	NME2	1	0.00813597	87.696	RFEQK(1)GFR	3	-0.13856	2	0.988	0.842	0.955	1.012	1.115	1.036	1.136	0.085776
P22626	112	K	Heterogeneous nuclear ribonucleoproteins A2/B1 OS=Homo sapiens OX=9606 GN=HNRNPA2B1 PE=1 SV=2	HNRNPA2B1	1	0.000195494	86.539	EESGKPGAHVTVK(1)K	3	-0.19787	2	0.814	0.774	0.908	1.157	1.262	0.944	1.347	0.040405
P22626	104	K	Heterogeneous nuclear ribonucleoproteins A2/B1 OS=Homo sapiens OX=9606 GN=HNRNPA2B1 PE=1 SV=2	HNRNPA2B1	1	0.00485391	52.599	EESGK(1)PGAHVTVK	3	0.93241	1	0.703	0.805	0.734	0.913	1.641	0.965	1.57	0.095243
P22626	120	K	Heterogeneous nuclear ribonucleoproteins A2/B1 OS=Homo sapiens OX=9606 GN=HNRNPA2B1 PE=1 SV=2	HNRNPA2B1	1	0.000109254	67.326	LFVGGIK(1)EDTEEHHLR	4	-0.64132	1
P22626	173	K	Heterogeneous nuclear ribonucleoproteins A2/B1 OS=Homo sapiens OX=9606 GN=HNRNPA2B1 PE=1 SV=2	HNRNPA2B1	1	4.21391e-57	205.78	IVLQK(1)YHTINGHNAEVR	3	4.1545	8	0.903	0.944	0.933	1.057	1.074	1.033	1.138	0.00175946
P22626	168	K	Heterogeneous nuclear ribonucleoproteins A2/B1 OS=Homo sapiens OX=9606 GN=HNRNPA2B1 PE=1 SV=2	HNRNPA2B1	1	1.86776e-08	104.88	GFGFVTFDDHDPVDK(1)IVLQK	3	1.5104	1
P22676	141	K	Calretinin OS=Homo sapiens OX=9606 GN=CALB2 PE=2 SV=2	CALB2	1	0.00101512	115.78	GFLSDLLK(1)K	3	-1.1195	2	0.828	0.85	0.779	1.126	1.108	1.149	1.377	0.00032403
P22676	230	K	Calretinin OS=Homo sapiens OX=9606 GN=CALB2 PE=2 SV=2	CALB2	1	0.00468142	99.442	DLYEK(1)NK	3	0.16133	3	1.063	1.113	1.077	0.96	0.949	0.938	0.875	0.0009405
P22695	375	K	Cytochrome b-c1 complex subunit 2, mitochondrial OS=Homo sapiens OX=9606 GN=UQCRC2 PE=1 SV=3	UQCRC2	1	4.33332e-14	122.01	TIAQGNLSNTDVQAAK(1)NK	3	0.0098375	1	1.021	1.022	1.05	0.977	1.034	0.944	0.955	0.174916
P22794	170	K	Protein EVI2A OS=Homo sapiens OX=9606 GN=EVI2A PE=2 SV=2	EVI2A	1	0.0125926	48.284	SK(1)QVGK(1)RQPR	3	3.0827	2	0.525	0.495	0.558	1.346	1.397	1.237	2.522	4.4941e-05
P22794	174	K	Protein EVI2A OS=Homo sapiens OX=9606 GN=EVI2A PE=2 SV=2	EVI2A	1	0.0125926	48.284	SK(1)QVGK(1)RQPR	3	3.0827	2	0.525	0.495	0.558	1.346	1.397	1.237	2.522	4.4941e-05
P23193	269	K	Transcription elongation factor A protein 1 OS=Homo sapiens OX=9606 GN=TCEA1 PE=1 SV=2	TCEA1	1	0.000553616	92.039	K(1)NCTYTQVQTR	2	1.4247	1	0.844	0.892	1.053	1.043	1.078	1.034	1.131	0.13238
P23193	208	K	Transcription elongation factor A protein 1 OS=Homo sapiens OX=9606 GN=TCEA1 PE=1 SV=2	TCEA1	1	2.3151e-05	98.633	K(1)NVLCGNIPPDLFAR	3	-1.1219	2	1.213	1.236	1.162	0.871	0.875	0.861	0.722	6.3298e-05
P23193	19	K	Transcription elongation factor A protein 1 OS=Homo sapiens OX=9606 GN=TCEA1 PE=1 SV=2	TCEA1	1	0.00301439	79.492	K(1)NAAGALDLLK	3	0.39102	2	0.912	0.841	0.881	1.003	1.125	1.133	1.238	0.0098398
P23229	594	K	Integrin alpha-6 OS=Homo sapiens OX=9606 GN=ITGA6 PE=1 SV=5	ITGA6	1	0.0014851	102.53	YTQELTLK(1)R	2	0.55207	2	0.382	0.524	0.521	1.331	1.345	1.394	2.852	0.0097615
P23229	144	K	Integrin alpha-6 OS=Homo sapiens OX=9606 GN=ITGA6 PE=1 SV=5	ITGA6	1	3.1719e-06	130.01	QHVNTK(1)QESR	2	1.0391	2	0.354	0.398	0.382	1.474	1.325	1.474	3.768	1.57151e-05
P23246	559	K	Splicing factor, proline- and glutamine-rich OS=Homo sapiens OX=9606 GN=SFPQ PE=1 SV=2	SFPQ	1	1.15008e-07	121.02	MEELHNQEMQK(1)R	3	-1.0483	1	0.879	0.921	0.898	1.12	1.098	1.007	1.195	0.0073577
P23246	291	K	Splicing factor, proline- and glutamine-rich OS=Homo sapiens OX=9606 GN=SFPQ PE=1 SV=2	SFPQ	1	8.40845e-05	98.156	RPGEK(1)TYTQR	3	-0.73735	1	1.495	1.709	1.664	0.668	0.613	0.48	0.362	0.0006635
P23246	208	K	Splicing factor, proline- and glutamine-rich OS=Homo sapiens OX=9606 GN=SFPQ PE=1 SV=2	SFPQ	1	0.000726298	89.301	QGPGPGGPK(1)GGK	2	1.5512	2	0.933	1.06	1.072	1.125	0.971	0.884	0.972	0.72698
P23246	314	K	Splicing factor, proline- and glutamine-rich OS=Homo sapiens OX=9606 GN=SFPQ PE=1 SV=2	SFPQ	1	1.17108e-33	164.53	LFVGNLPADITEDEFK(1)R	2	0.69924	2	1.419	1.194	1.314	0.835	0.809	0.757	0.611	0.00105561
P23246	703	K	Splicing factor, proline- and glutamine-rich OS=Homo sapiens OX=9606 GN=SFPQ PE=1 SV=2	SFPQ	1	0.00196425	63.816	EEYEGPNK(1)K	3	-0.17098	1
P23246	472	K	Splicing factor, proline- and glutamine-rich OS=Homo sapiens OX=9606 GN=SFPQ PE=1 SV=2	SFPQ	1	0.0202407	77.192	NPMYQK(1)ER	2	-0.67766	1	0.99	1.01	0.949	1.046	0.989	1.02	1.036	0.22198
P23246	319	K	Splicing factor, proline- and glutamine-rich OS=Homo sapiens OX=9606 GN=SFPQ PE=1 SV=2	SFPQ	1	0.000231504	73.834	LFAK(1)YGEPGEVFINK	3	-0.67325	2	1.246	1.206	1.204	0.819	0.897	0.86	0.705	0.00025627
P23246	413	K	Splicing factor, proline- and glutamine-rich OS=Homo sapiens OX=9606 GN=SFPQ PE=1 SV=2	SFPQ	1	0.00185627	79.652	STGK(1)GIVEFASK	2	0.92468	1	0.932	0.888	0.905	1.024	1.097	1.08	1.175	0.003077
P23246	510	K	Splicing factor, proline- and glutamine-rich OS=Homo sapiens OX=9606 GN=SFPQ PE=1 SV=2	SFPQ	1	0.00373762	104.22	EQVEK(1)NMK	2	-0.77395	1	0.87	0.859	0.829	1.118	1.084	1.114	1.296	0.00011912
P23284	67	K	Peptidyl-prolyl cis-trans isomerase B OS=Homo sapiens OX=9606 GN=PPIB PE=1 SV=2	PPIB	1	1.5911e-05	70.942	VIFGLFGK(1)TVPK	3	0.51464	1
P23284	131	K	Peptidyl-prolyl cis-trans isomerase B OS=Homo sapiens OX=9606 GN=PPIB PE=1 SV=2	PPIB	1	1.66404e-12	125.22	LK(1)HYGPGWVSMANAGK	4	0.65462	2	0.86	0.982	0.914	1.103	1.058	1.022	1.155	0.030521
P23284	71	K	Peptidyl-prolyl cis-trans isomerase B OS=Homo sapiens OX=9606 GN=PPIB PE=1 SV=2	PPIB	1	3.1757e-06	100.04	TVPK(1)TVDNFVALATGEK	3	-0.10641	1	0.86	0.884	0.734	1.092	1.242	1.037	1.36	0.0175002
P23284	165	K	Peptidyl-prolyl cis-trans isomerase B OS=Homo sapiens OX=9606 GN=PPIB PE=1 SV=2	PPIB	1	9.64037e-13	133.16	TAWLDGK(1)HVVFGK	4	0.31294	3	0.854	0.865	0.912	1.121	1.08	1.067	1.242	0.00097508
P23284	129	K	Peptidyl-prolyl cis-trans isomerase B OS=Homo sapiens OX=9606 GN=PPIB PE=1 SV=2	PPIB	1	0.0113626	70.942	FPDENFK(1)LK	3	-0.38822	2	0.71	0.703	0.677	1.218	1.193	1.22	1.737	2.1985e-06
P23284	98	K	Peptidyl-prolyl cis-trans isomerase B OS=Homo sapiens OX=9606 GN=PPIB PE=1 SV=2	PPIB	1	0.0011249	57.288	VIK(1)DFMIQGGDFTR	3	-1.1814	1	0.871	0.806	0.886	1.157	1.235	0.927	1.295	0.051283
P23284	209	K	Peptidyl-prolyl cis-trans isomerase B OS=Homo sapiens OX=9606 GN=PPIB PE=1 SV=2	PPIB	1	0.000600771	81.017	IEVEK(1)PFAIAK	3	-0.25795	1	0.961	1.006	1.091	1.091	0.974	0.917	0.975	0.69678
P23284	215	K	Peptidyl-prolyl cis-trans isomerase B OS=Homo sapiens OX=9606 GN=PPIB PE=1 SV=2	PPIB	0.999974	0.00810599	71.531	IEVEKPFAIAK(1)E	2	0.05953	1	0.53	0.45	0.485	1.419	1.275	1.361	2.768	5.7981e-05
P23284	116	K	Peptidyl-prolyl cis-trans isomerase B OS=Homo sapiens OX=9606 GN=PPIB PE=1 SV=2	PPIB	1	6.56928e-13	137.21	GDGTGGK(1)SIYGER	2	0.95429	3	0.82	0.765	0.783	1.17	1.131	1.145	1.455	7.8989e-05
P23284	186	K	Peptidyl-prolyl cis-trans isomerase B OS=Homo sapiens OX=9606 GN=PPIB PE=1 SV=2	PPIB	1	0.00214624	76.326	VESTK(1)TDSR	2	1.0719	2	0.776	0.75	0.668	1.175	1.209	1.177	1.623	0.00046209
P23284	89	K	Peptidyl-prolyl cis-trans isomerase B OS=Homo sapiens OX=9606 GN=PPIB PE=1 SV=2	PPIB	1	0.00424541	101.65	GFGYK(1)NSK	3	3.0033	2	0.995	0.96	0.912	1.07	1.004	1.037	1.085	0.058615
P23284	171	K	Peptidyl-prolyl cis-trans isomerase B OS=Homo sapiens OX=9606 GN=PPIB PE=1 SV=2	PPIB	1	0.000180522	83.692	HVVFGK(1)VLEGMEVVR	3	0.41389	1	0.896	0.872	1.106	0.927	1.125	1.041	1.076	0.46312
P23284	195	K	Peptidyl-prolyl cis-trans isomerase B OS=Homo sapiens OX=9606 GN=PPIB PE=1 SV=2	PPIB	0.999814	5.59879e-11	121.82	DKPLK(1)DVIIADCGK	3	-0.15091	2	1.236	1.154	1.095	0.882	0.9	0.912	0.773	0.0021414
P23368	156	K	NAD-dependent malic enzyme, mitochondrial OS=Homo sapiens OX=9606 GN=ME2 PE=1 SV=1	ME2	1	4.83585e-16	121.25	SIVDNWPENHVK(1)AVVVTDGER	3	0.083795	1	1.008	1.022	1.082	0.946	1.027	0.966	0.944	0.155663
P23381	253	K	Tryptophan--tRNA ligase, cytoplasmic OS=Homo sapiens OX=9606 GN=WARS PE=1 SV=2	WARS	1	0.00684026	98.997	NVVK(1)IQK	3	0.34504	2	1.066	1.035	1	0.968	0.984	0.996	0.951	0.067677
P23381	256	K	Tryptophan--tRNA ligase, cytoplasmic OS=Homo sapiens OX=9606 GN=WARS PE=1 SV=2	WARS	1	8.60127e-07	127.87	IQK(1)HVTFNQVK	3	1.0314	1	0.71	0.666	0.737	1.208	1.203	1.205	1.711	0.0030162
P23381	111	K	Tryptophan--tRNA ligase, cytoplasmic OS=Homo sapiens OX=9606 GN=WARS PE=1 SV=2	WARS	1	0.0126521	82.831	FGSSK(1)IDK	2	-0.11876	1	0.991	1.016	0.943	1.028	1.01	1.014	1.035	0.20154
P23396	75	K	40S ribosomal protein S3 OS=Homo sapiens OX=9606 GN=RPS3 PE=1 SV=2	RPS3	1	0.000501849	107.69	ELTAVVQK(1)R	3	-1.1054	2	1.025	0.948	1.045	0.938	1.077	0.988	0.995	0.91438
P23396	108	K	40S ribosomal protein S3 OS=Homo sapiens OX=9606 GN=RPS3 PE=1 SV=2	RPS3	1	0.000341745	107.58	YK(1)LLGGLAVR	2	-0.88577	1	0.898	0.904	0.916	1.108	1.089	1.013	1.181	0.0041216
P23396	10	K	40S ribosomal protein S3 OS=Homo sapiens OX=9606 GN=RPS3 PE=1 SV=2	RPS3	1	0.00651328	79.659	K(1)FVADGIFK	3	0.64024	2	0.894	0.88	0.825	1.077	1.018	1.191	1.264	0.0110243
P23396	187	K	40S ribosomal protein S3 OS=Homo sapiens OX=9606 GN=RPS3 PE=1 SV=2	RPS3	1	0.00108072	85.837	VK(1)IMLPWDPTGK	3	-1.8469	4	0.924	0.978	0.98	1.049	1.023	1.025	1.075	0.025881
P23396	62	K	40S ribosomal protein S3 OS=Homo sapiens OX=9606 GN=RPS3 PE=1 SV=2	RPS3	1	0.000231786	95.417	TQNVLGEK(1)GR	2	-0.92384	2	0.844	0.867	0.931	1.136	1.023	1.1	1.234	0.0079189
P23497	306	K	Nuclear autoantigen Sp-100 OS=Homo sapiens OX=9606 GN=SP100 PE=1 SV=3	SP100	0.999976	0.000156458	85.176	EKPFSNSK(1)VECQAQAR	3	-0.25067	1	1.369	1.23	1.33	0.801	0.783	0.812	0.61	0.000123111
P23526	408	K	Adenosylhomocysteinase OS=Homo sapiens OX=9606 GN=AHCY PE=1 SV=4	AHCY	1	0.0162197	90.906	LTK(1)LTEK	2	0.20692	1	1.032	0.982	1.018	0.995	1.03	0.973	0.989	0.63684
P23526	426	K	Adenosylhomocysteinase OS=Homo sapiens OX=9606 GN=AHCY PE=1 SV=4	AHCY	1	4.77581e-15	124.63	QAQYLGMSCDGPFK(1)PDHYR	3	-1.1697	5	1.004	0.97	1.015	1.005	0.994	1.025	1.012	0.51232
P23526	186	K	Adenosylhomocysteinase OS=Homo sapiens OX=9606 GN=AHCY PE=1 SV=4	AHCY	1	0.000395245	89.624	VPAINVNDSVTK(1)SK	2	0.095292	2	1.431	1.362	1.258	0.792	0.811	0.715	0.572	0.00048472
P23526	188	K	Adenosylhomocysteinase OS=Homo sapiens OX=9606 GN=AHCY PE=1 SV=4	AHCY	1	3.80199e-07	138.63	SK(1)FDNLYGCR	2	0.58571	2	1.309	1.336	1.401	0.765	0.768	0.779	0.571	1.57556e-05
P23526	405	K	Adenosylhomocysteinase OS=Homo sapiens OX=9606 GN=AHCY PE=1 SV=4	AHCY	1	0.0215894	85.676	LNVK(1)LTK	2	0.47131	1	1.025	0.985	1.022	0.944	1.066	0.985	0.988	0.74134
P23526	388	K	Adenosylhomocysteinase OS=Homo sapiens OX=9606 GN=AHCY PE=1 SV=4	AHCY	1	0.0066114	58.699	YPVGVHFLPK(1)K	3	-0.61325	1	0.948	0.916	0.998	1.048	1.03	1.033	1.087	0.030018
P23526	322	K	Adenosylhomocysteinase OS=Homo sapiens OX=9606 GN=AHCY PE=1 SV=4	AHCY	1	0.0412204	56.548	VNIK(1)PQVDR	2	-1.3224	1	0.97	0.933	0.994	0.988	1.087	1.01	1.065	0.142738
P23527	6	K	Histone H2B type 1-O OS=Homo sapiens OX=9606 GN=HIST1H2BO PE=1 SV=3	HIST1H2BO	1	5.53429e-05	107.39	PDPAK(1)SAPAPK(1)K(1)GSK(1)K	3	-1.8628	7	0.983	0.999	0.851	1.072	0.939	1.119	1.105	0.24656
P23527	13	K	Histone H2B type 1-O OS=Homo sapiens OX=9606 GN=HIST1H2BO PE=1 SV=3	HIST1H2BO	1	3.70898e-13	144.29	SAPAPK(1)K(1)GSK(1)K	4	-0.49371	26	1.042	1.02	0.976	1.033	0.95	1.012	0.986	0.671
P23527	16	K	Histone H2B type 1-O OS=Homo sapiens OX=9606 GN=HIST1H2BO PE=1 SV=3	HIST1H2BO	1	3.70898e-13	144.29	SAPAPK(1)K(1)GSK(1)K	4	-0.49371	31	1.045	1.009	0.971	1.032	0.961	1.012	0.993	0.836
P23527	12	K	Histone H2B type 1-O OS=Homo sapiens OX=9606 GN=HIST1H2BO PE=1 SV=3	HIST1H2BO	1	1.79542e-05	115.12	SAPAPK(1)K(1)GSK(1)K	4	-0.49371	12	0.994	0.985	0.952	1.037	0.997	1.033	1.046	0.066759
P23527	17	K	Histone H2B type 1-O OS=Homo sapiens OX=9606 GN=HIST1H2BO PE=1 SV=3	HIST1H2BO	1	3.70898e-13	144.29	K(1)GSK(1)K(1)AVTK(1)AQK	2	1.0217	32	1.105	1.06	1.011	0.994	0.936	0.974	0.914	0.045858
P23528	114	K	Cofilin-1 OS=Homo sapiens OX=9606 GN=CFL1 PE=1 SV=3	CFL1	1	0.00141264	98.105	SK(1)MIYASSK	3	0.95389	2	1.074	1.071	1.139	0.965	0.944	0.919	0.861	0.0036955
P23528	78	K	Cofilin-1 OS=Homo sapiens OX=9606 GN=CFL1 PE=1 SV=3	CFL1	1	0.0261833	73.573	MLPDK(1)DCR	2	-0.9076	1	1.372	1.381	1.339	0.759	0.838	0.688	0.558	0.00053507
P23528	121	K	Cofilin-1 OS=Homo sapiens OX=9606 GN=CFL1 PE=1 SV=3	CFL1	1	7.66791e-06	120.87	MIYASSK(1)DAIK	3	1.0697	4	0.995	0.984	0.994	1.062	1.008	0.97	1.023	0.50046
P23528	92	K	Cofilin-1 OS=Homo sapiens OX=9606 GN=CFL1 PE=1 SV=3	CFL1	1	1.70741e-10	121.99	YALYDATYETK(1)ESK	2	0.88008	2	0.714	0.743	0.716	1.144	1.227	1.2	1.643	3.7006e-05
P23528	22	K	Cofilin-1 OS=Homo sapiens OX=9606 GN=CFL1 PE=1 SV=3	CFL1	1	0.000127676	131.42	K(1)SSTPEEVK	2	-0.77323	3	0.973	0.97	0.851	1.064	1.054	1.042	1.131	0.107098
P23528	45	K	Cofilin-1 OS=Homo sapiens OX=9606 GN=CFL1 PE=1 SV=3	CFL1	1	0.00127427	101.39	K(1)NIILEEGK	2	0.23308	5	1.734	1.655	1.576	0.555	0.587	0.557	0.342	2.6776e-06
P23528	144	K	Cofilin-1 OS=Homo sapiens OX=9606 GN=CFL1 PE=1 SV=3	CFL1	1	5.44334e-18	156	HELQANCYEEVK(1)DR	3	0.045666	6	1.41	1.416	1.341	0.744	0.751	0.739	0.536	2.1185e-06
P23528	132	K	Cofilin-1 OS=Homo sapiens OX=9606 GN=CFL1 PE=1 SV=3	CFL1	1	4.1293e-20	143.46	LTGIK(1)HELQANCYEEVKDR	4	-0.1787	12	1.02	0.965	1.017	1.006	0.996	1.016	1.005	0.78154
P23528	19	K	Cofilin-1 OS=Homo sapiens OX=9606 GN=CFL1 PE=1 SV=3	CFL1	1	0.00884439	89.047	VFNDMK(1)VR	2	-0.53938	1	1.003	0.882	1.034	1.08	0.969	1.029	1.054	0.40102
P23528	44	K	Cofilin-1 OS=Homo sapiens OX=9606 GN=CFL1 PE=1 SV=3	CFL1	1	4.72599e-11	153.95	AVLFCLSEDK(1)K	2	-0.65835	3	1.595	1.575	1.523	0.642	0.654	0.585	0.401	1.80522e-05
P23588	586	K	Eukaryotic translation initiation factor 4B OS=Homo sapiens OX=9606 GN=EIF4B PE=1 SV=2	EIF4B	1	5.13251e-06	101.05	KPEENPASK(1)FSSASK	3	0.29083	1	1.137	1.148	0.995	0.864	0.969	0.993	0.862	0.077665
P23786	79	K	Carnitine O-palmitoyltransferase 2, mitochondrial OS=Homo sapiens OX=9606 GN=CPT2 PE=1 SV=2	CPT2	1	0.0400965	76.064	K(1)TEQFCK	2	1.2304	1	1.736	1.604	1.461	0.601	0.63	0.581	0.377	6.0259e-05
P23921	414	K	Ribonucleoside-diphosphate reductase large subunit OS=Homo sapiens OX=9606 GN=RRM1 PE=1 SV=1	RRM1	1	3.90941e-15	159.66	K(1)SNQQNLGTIK	2	0.94274	1	1.843	2.011	1.903	0.412	0.374	0.373	0.201	1.3358e-06
P23942	11	K	Peripherin-2 OS=Homo sapiens OX=9606 GN=PRPH2 PE=1 SV=1	PRPH2	1	0.0367717	40.268	VK(1)FDQK(1)K	4	1.0708	1
P23942	7	K	Peripherin-2 OS=Homo sapiens OX=9606 GN=PRPH2 PE=1 SV=1	PRPH2	1	0.0367717	40.268	VK(1)FDQK(1)K	4	1.0708	1
P24043	3092	K	Laminin subunit alpha-2 OS=Homo sapiens OX=9606 GN=LAMA2 PE=1 SV=4	LAMA2	1	0.0350388	67.385	GCIRSLK(1)LTK	2	3.4243	1	0.661	0.626	0.658	1.283	1.221	1.227	1.918	1.50302e-05
P24534	60	K	Elongation factor 1-beta OS=Homo sapiens OX=9606 GN=EEF1B2 PE=1 SV=3	EEF1B2	1	0.00070547	81.017	WYNHIK(1)SYEK	3	-0.91518	3	0.941	0.897	0.92	1.057	1.038	1.086	1.153	0.00170322
P24534	185	K	Elongation factor 1-beta OS=Homo sapiens OX=9606 GN=EEF1B2 PE=1 SV=3	EEF1B2	1	3.95851e-05	123.35	LVPVGYGIK(1)K	3	-0.94887	2	1.129	1.126	1.079	0.94	0.924	0.931	0.838	0.00034067
P24534	73	K	Elongation factor 1-beta OS=Homo sapiens OX=9606 GN=EEF1B2 PE=1 SV=3	EEF1B2	1	0.000683607	119.41	ASLPGVK(1)K	3	0.31554	2	0.966	0.989	1.079	0.988	1.053	0.953	0.987	0.78512
P24534	129	K	Elongation factor 1-beta OS=Homo sapiens OX=9606 GN=EEF1B2 PE=1 SV=3	EEF1B2	1	0.00322946	107.79	LAQYESK(1)K	2	-0.034354	2	0.996	0.949	0.952	0.997	1.024	1.065	1.065	0.063176
P24534	133	K	Elongation factor 1-beta OS=Homo sapiens OX=9606 GN=EEF1B2 PE=1 SV=3	EEF1B2	1	0.0376143	77.058	K(1)PALVAK	2	0.68843	1
P24534	78	K	Elongation factor 1-beta OS=Homo sapiens OX=9606 GN=EEF1B2 PE=1 SV=3	EEF1B2	1	6.67596e-22	97.776	ALGK(1)YGPADVEDTTGSGATDSK	3	-1.914	1
P24539	233	K	ATP synthase F(0) complex subunit B1, mitochondrial OS=Homo sapiens OX=9606 GN=ATP5PB PE=1 SV=2	ATP5PB	1	8.75326e-05	75.376	HVVQSISTQQEK(1)ETIAK	3	0.19459	1	1.046	0.992	1.023	0.9	1.008	1.063	0.971	0.56766
P24539	162	K	ATP synthase F(0) complex subunit B1, mitochondrial OS=Homo sapiens OX=9606 GN=ATP5PB PE=1 SV=2	ATP5PB	1	9.01187e-06	106.4	SQQALVQK(1)R	2	-2.4575	1
P24666	156	K	Low molecular weight phosphotyrosine protein phosphatase OS=Homo sapiens OX=9606 GN=ACP1 PE=1 SV=3	ACP1	1	0.0237059	83.614	AFLEK(1)AH	2	-1.0577	1	1.247	1.273	1.195	0.79	0.879	0.865	0.682	0.00054423
P24666	65	K	Low molecular weight phosphotyrosine protein phosphatase OS=Homo sapiens OX=9606 GN=ACP1 PE=1 SV=3	ACP1	1	0.0362763	46.426	GQSCMK(1)R	2	-0.69206	2	1.722	1.619	1.703	0.516	0.593	0.534	0.326	1.83067e-05
P24666	113	K	Low molecular weight phosphotyrosine protein phosphatase OS=Homo sapiens OX=9606 GN=ACP1 PE=1 SV=3	ACP1	1	0.000278246	80.96	AK(1)IELLGSYDPQK	3	-0.38785	1	1.69	1.581	1.512	0.61	0.588	0.623	0.381	1.60738e-05
P24752	174	K	Acetyl-CoA acetyltransferase, mitochondrial OS=Homo sapiens OX=9606 GN=ACAT1 PE=1 SV=1	ACAT1	1	0.000149298	75.018	GSTPYGGVK(1)LEDLIVK	3	0.042257	1	1.807	1.635	1.755	0.54	0.495	0.509	0.297	3.2579e-06
P24928	226	K	DNA-directed RNA polymerase II subunit RPB1 OS=Homo sapiens OX=9606 GN=POLR2A PE=1 SV=2	POLR2A	1	0.00189359	107.43	VHEIFK(1)R	3	-0.72251	1	1.251	1.116	1.082	0.971	0.864	0.889	0.79	0.0140353
P25205	248	K	DNA replication licensing factor MCM3 OS=Homo sapiens OX=9606 GN=MCM3 PE=1 SV=3	MCM3	1	0.0330592	56.551	K(1)GGYTSGTFR	2	1.0014	1
P25205	570	K	DNA replication licensing factor MCM3 OS=Homo sapiens OX=9606 GN=MCM3 PE=1 SV=3	MCM3	1	0.0346949	57.281	K(1)YIHVAK	3	-0.1295	1	1.058	0.994	0.987	1.026	1.038	0.933	0.986	0.73656
P25398	112	K	40S ribosomal protein S12 OS=Homo sapiens OX=9606 GN=RPS12 PE=1 SV=3	RPS12	1	9.08818e-05	94.09	VVGCSCVVVK(1)DYGK	2	0.26789	2	1.155	1.146	1.153	0.884	0.869	0.957	0.785	0.0146608
P25398	93	K	40S ribosomal protein S12 OS=Homo sapiens OX=9606 GN=RPS12 PE=1 SV=3	RPS12	1	0.00747909	63.727	LGEWVGLCK(1)IDR	2	-1.3348	1	1.126	1.195	1.152	0.897	0.932	0.869	0.777	0.00068485
P25398	116	K	40S ribosomal protein S12 OS=Homo sapiens OX=9606 GN=RPS12 PE=1 SV=3	RPS12	1	0.000122282	117.25	DYGK(1)ESQAK	2	-0.38668	2	1.284	1.156	1.185	0.825	0.94	0.834	0.717	0.0031395
P25398	102	K	40S ribosomal protein S12 OS=Homo sapiens OX=9606 GN=RPS12 PE=1 SV=3	RPS12	1	0.0127055	64.121	K(1)VVGCSCVVVK	2	-0.74264	1
P25398	129	K	40S ribosomal protein S12 OS=Homo sapiens OX=9606 GN=RPS12 PE=1 SV=3	RPS12	1	6.15825e-07	134.13	DVIEEYFK(1)CK	2	-0.40083	2	1.214	1.167	1.298	0.877	0.848	0.838	0.697	0.00044112
P25685	35	K	DnaJ homolog subfamily B member 1 OS=Homo sapiens OX=9606 GN=DNAJB1 PE=1 SV=4	DNAJB1	1	0.0161937	67.032	YHPDK(1)NK	3	3.4717	2	0.753	0.692	0.711	1.223	1.134	1.231	1.664	0.000144468
P25685	181	K	DnaJ homolog subfamily B member 1 OS=Homo sapiens OX=9606 GN=DNAJB1 PE=1 SV=4	DNAJB1	1	0.00235196	57.434	VSLEEIYSGCTK(1)K	3	0.77709	1	1.089	1.279	1.238	0.855	0.896	0.851	0.722	0.0033181
P25685	286	K	DnaJ homolog subfamily B member 1 OS=Homo sapiens OX=9606 GN=DNAJB1 PE=1 SV=4	DNAJB1	1	0.00126733	79.492	TIPVVFK(1)DVIR	3	0.70474	2	1.267	1.292	1.167	0.833	0.862	0.835	0.679	0.00030358
P25685	3	K	DnaJ homolog subfamily B member 1 OS=Homo sapiens OX=9606 GN=DNAJB1 PE=1 SV=4	DNAJB1	1	3.11133e-07	121.45	GK(1)DYYQTLGLAR	2	1.5419	1	0.756	0.693	0.722	1.25	1.15	1.182	1.65	0.000140274
P25705	503	K	ATP synthase subunit alpha, mitochondrial OS=Homo sapiens OX=9606 GN=ATP5F1A PE=1 SV=1	ATP5F1A	1	0.00339187	105.98	LEPSK(1)ITK	2	-0.28204	1	0.992	0.931	0.91	1.07	1.067	0.997	1.106	0.043282
P25705	239	K	ATP synthase subunit alpha, mitochondrial OS=Homo sapiens OX=9606 GN=ATP5F1A PE=1 SV=1	ATP5F1A	1	0.0033202	86.911	RFNDGSDEK(1)K	3	-0.91037	3	1.095	1.059	1.083	0.968	0.924	0.968	0.884	0.002505
P25705	230	K	ATP synthase subunit alpha, mitochondrial OS=Homo sapiens OX=9606 GN=ATP5F1A PE=1 SV=1	ATP5F1A	1	2.7691e-11	131.17	TSIAIDTIINQK(1)R	2	0.68933	2	1.033	0.929	1.01	1.046	1.011	0.984	1.023	0.55512
P25705	305	K	ATP synthase subunit alpha, mitochondrial OS=Homo sapiens OX=9606 GN=ATP5F1A PE=1 SV=1	ATP5F1A	1	0.000169294	84.375	DNGK(1)HALIIYDDLSK	3	0.054994	1	0.945	1	0.987	1.028	1.022	1.013	1.045	0.06708
P25705	218	K	ATP synthase subunit alpha, mitochondrial OS=Homo sapiens OX=9606 GN=ATP5F1A PE=1 SV=1	ATP5F1A	1	1.43623e-17	134.14	QTGK(1)TSIAIDTIINQK	3	-0.089438	1	0.878	0.932	0.929	1.02	1.016	1.15	1.163	0.029176
P25705	531	K	ATP synthase subunit alpha, mitochondrial OS=Homo sapiens OX=9606 GN=ATP5F1A PE=1 SV=1	ATP5F1A	1	1.99188e-06	113.4	ADGK(1)ISEQSDAK	2	-0.37134	2	1.15	1.161	1.189	0.886	0.883	0.91	0.765	4.0645e-05
P25705	498	K	ATP synthase subunit alpha, mitochondrial OS=Homo sapiens OX=9606 GN=ATP5F1A PE=1 SV=1	ATP5F1A	1	0.00207147	74.841	GYLDK(1)LEPSK	3	-0.52692	1	1.057	1.045	1.049	0.928	0.962	1.023	0.924	0.109422
P25705	539	K	ATP synthase subunit alpha, mitochondrial OS=Homo sapiens OX=9606 GN=ATP5F1A PE=1 SV=1	ATP5F1A	1	0.000102805	117.79	ISEQSDAK(1)LK	3	0.1363	2	1.201	1.188	1.175	0.88	0.864	0.893	0.74	1.61993e-05
P25786	39	K	Proteasome subunit alpha type-1 OS=Homo sapiens OX=9606 GN=PSMA1 PE=1 SV=1	PSMA1	1	0.0041244	75.764	QGSATVGLK(1)SK	2	3.9393	2	0.955	0.992	0.995	1.044	1.014	0.999	1.039	0.106678
P25786	61	K	Proteasome subunit alpha type-1 OS=Homo sapiens OX=9606 GN=PSMA1 PE=1 SV=1	PSMA1	1	5.1219e-05	99.5	AQSELAAHQK(1)K	3	-0.53956	1	1.021	0.972	1.07	1.007	1.034	0.937	0.972	0.52352
P25786	115	K	Proteasome subunit alpha type-1 OS=Homo sapiens OX=9606 GN=PSMA1 PE=1 SV=1	PSMA1	1	7.63745e-06	104.21	LVSLIGSK(1)TQIPTQR	2	-0.43334	2	1.037	1.054	0.961	0.961	0.999	1.021	0.977	0.52964
P25787	53	K	Proteasome subunit alpha type-2 OS=Homo sapiens OX=9606 GN=PSMA2 PE=1 SV=2	PSMA2	1	0.0244444	65.179	QK(1)SILYDER	2	1.6414	1
P25788	238	K	Proteasome subunit alpha type-3 OS=Homo sapiens OX=9606 GN=PSMA3 PE=1 SV=2	PSMA3	1	0.00424541	101.65	EEAEK(1)YAK	2	0.93268	1	0.949	0.962	1.067	1.025	1.014	0.993	1.018	0.64014
P25788	174	K	Proteasome subunit alpha type-3 OS=Homo sapiens OX=9606 GN=PSMA3 PE=1 SV=2	PSMA3	1	0.00531184	67.334	QAAK(1)TEIEK	3	0.057762	1	1.013	1.135	1.193	0.97	0.925	0.891	0.834	0.029518
P25788	57	K	Proteasome subunit alpha type-3 OS=Homo sapiens OX=9606 GN=PSMA3 PE=1 SV=2	PSMA3	1	0.000402337	74.987	LVLSK(1)LYEEGSNK	3	0.79871	1	1.026	0.985	1.016	1.004	0.944	1.049	0.99	0.76086
P25788	206	K	Proteasome subunit alpha type-3 OS=Homo sapiens OX=9606 GN=PSMA3 PE=1 SV=2	PSMA3	1	1.19738e-07	128.54	IIYIVHDEVK(1)DK	2	0.25229	2	0.869	0.869	0.862	1.127	1.059	1.103	1.265	0.0061189
P25788	183	K	Proteasome subunit alpha type-3 OS=Homo sapiens OX=9606 GN=PSMA3 PE=1 SV=2	PSMA3	1	0.0318989	61.344	LQMK(1)EMTCR	2	1.2517	1	1.223	1.165	1.175	0.867	0.916	0.857	0.741	0.00029735
P25788	192	K	Proteasome subunit alpha type-3 OS=Homo sapiens OX=9606 GN=PSMA3 PE=1 SV=2	PSMA3	1	3.40535e-06	103.26	DIVK(1)EVAK	2	-1.7235	1
P25788	65	K	Proteasome subunit alpha type-3 OS=Homo sapiens OX=9606 GN=PSMA3 PE=1 SV=2	PSMA3	1	0.00145772	94.309	LYEEGSNK(1)R	2	0.84747	1	1.042	0.914	1.005	1.014	0.979	1.052	1.028	0.54732
P25789	127	K	Proteasome subunit alpha type-4 OS=Homo sapiens OX=9606 GN=PSMA4 PE=1 SV=1	PSMA4	1	0.000214474	113.38	QAYTQFGGK(1)R	2	-0.082336	1	1.046	1.042	1.124	1.004	0.953	0.92	0.896	0.035699
P25789	199	K	Proteasome subunit alpha type-4 OS=Homo sapiens OX=9606 GN=PSMA4 PE=1 SV=1	PSMA4	1	0.000209308	113.24	VLNK(1)TMDVSK	3	0.54064	2	1.028	1.077	1.037	0.981	0.954	0.988	0.93	0.0155599
P25815	34	K	Protein S100-P OS=Homo sapiens OX=9606 GN=S100P PE=1 SV=2	S100P	1	0.00103442	93.345	GELK(1)VLMEK	3	-0.68063	2	0.987	0.923	0.92	1.056	1.016	1.062	1.107	0.0187839
P25815	49	K	Protein S100-P OS=Homo sapiens OX=9606 GN=S100P PE=1 SV=2	S100P	1	8.50278e-10	136.6	ELPGFLQSGK(1)DK	2	0.89268	2	0.892	0.938	0.947	1.065	1.032	1.068	1.14	0.0037162
P25815	30	K	Protein S100-P OS=Homo sapiens OX=9606 GN=S100P PE=1 SV=2	S100P	1	7.90647e-27	154.88	YSGSEGSTQTLTK(1)GELK	3	-0.84661	1	1.013	1.116	0.982	0.997	1.001	0.946	0.946	0.2737
P25815	91	K	Protein S100-P OS=Homo sapiens OX=9606 GN=S100P PE=1 SV=2	S100P	1	0.0091824	88.495	YFEK(1)AGLK	2	0.37664	1	0.988	0.964	1.009	1.007	1.009	1.027	1.028	0.13306
P26196	231	K	Probable ATP-dependent RNA helicase DDX6 OS=Homo sapiens OX=9606 GN=DDX6 PE=1 SV=2	DDX6	1	0.0271518	81.296	ILDLIK(1)K	2	-0.25575	1	0.987	1.033	1.001	1.049	0.993	0.963	0.995	0.84932
P26196	104	K	Probable ATP-dependent RNA helicase DDX6 OS=Homo sapiens OX=9606 GN=DDX6 PE=1 SV=2	DDX6	1	0.00508651	74.475	GNEFEDYCLK(1)R	2	0.40063	1	0.94	0.975	1.04	1.012	1.005	1.028	1.03	0.36642
P26196	86	K	Probable ATP-dependent RNA helicase DDX6 OS=Homo sapiens OX=9606 GN=DDX6 PE=1 SV=2	DDX6	1	0.0246359	61.11	IK(1)TSDVTSTK	2	-0.42102	1	1.165	1.115	1.072	0.957	0.88	0.947	0.831	0.0064848
P26196	236	K	Probable ATP-dependent RNA helicase DDX6 OS=Homo sapiens OX=9606 GN=DDX6 PE=1 SV=2	DDX6	1	7.25596e-06	92.679	GVAK(1)VDHVQMIVLDEADK	3	-0.0076616	1	0.987	0.909	0.931	1.098	1.041	1.003	1.111	0.042319
P26358	1572	K	DNA (cytosine-5)-methyltransferase 1 OS=Homo sapiens OX=9606 GN=DNMT1 PE=1 SV=2	DNMT1	1	0.000244174	90.15	LFGNILDK(1)HR	3	-0.25711	1	1.005	0.949	1.089	0.975	1.034	0.978	0.982	0.71502
P26358	67	K	DNA (cytosine-5)-methyltransferase 1 OS=Homo sapiens OX=9606 GN=DNMT1 PE=1 SV=2	DNMT1	1	0.00767344	67.997	NQLCDLETK(1)LR	2	2.1503	1	1.198	1.228	1.212	0.89	0.89	0.811	0.712	0.00043599
P26358	1004	K	DNA (cytosine-5)-methyltransferase 1 OS=Homo sapiens OX=9606 GN=DNMT1 PE=1 SV=2	DNMT1	1	0.00280758	68.972	K(1)SNGRPNETDIK	3	-1.3658	1	1.492	1.447	1.501	0.685	0.719	0.646	0.462	1.97721e-05
P26368	70	K	Splicing factor U2AF 65 kDa subunit OS=Homo sapiens OX=9606 GN=U2AF2 PE=1 SV=4	U2AF2	1	0.000405071	85.522	GAK(1)EEHGGLIR	2	-0.30709	2	0.743	0.748	0.822	1.07	1.151	1.249	1.5	0.00185874
P26368	462	K	Splicing factor U2AF 65 kDa subunit OS=Homo sapiens OX=9606 GN=U2AF2 PE=1 SV=4	U2AF2	1	0.000151529	86.944	VVVTK(1)YCDPDSYHR	3	-0.73037	2	0.702	0.77	0.809	1.15	1.143	1.203	1.533	0.00065807
P26373	123	K	60S ribosomal protein L13 OS=Homo sapiens OX=9606 GN=RPL13 PE=1 SV=4	RPL13	1	0.00456665	100.02	SK(1)LILFPR	2	-0.50818	1	0.932	1.074	0.893	0.993	1.069	1.02	1.063	0.34542
P26373	11	K	60S ribosomal protein L13 OS=Homo sapiens OX=9606 GN=RPL13 PE=1 SV=4	RPL13	1	0.00286151	62.466	NGMVLK(1)PHFHK	4	-0.52043	1	0.945	0.937	0.924	1.128	1.083	0.944	1.124	0.169536
P26373	174	K	60S ribosomal protein L13 OS=Homo sapiens OX=9606 GN=RPL13 PE=1 SV=4	RPL13	1	0.00494675	78.342	VITEEEK(1)NFK	2	-0.31334	1	1.047	0.951	0.747	1.136	1.061	1.003	1.166	0.2037
P26373	88	K	60S ribosomal protein L13 OS=Homo sapiens OX=9606 GN=RPL13 PE=1 SV=4	RPL13	1	0.0148826	74.717	VAGIHK(1)K	3	0.40195	1	1.051	0.981	0.971	1.031	1.013	0.977	1.006	0.84
P26373	16	K	60S ribosomal protein L13 OS=Homo sapiens OX=9606 GN=RPL13 PE=1 SV=4	RPL13	1	0.000557336	88.37	PHFHK(1)DWQR	4	0.35772	1	1.018	1.138	0.999	1.049	0.919	0.948	0.924	0.23936
P26373	105	K	60S ribosomal protein L13 OS=Homo sapiens OX=9606 GN=RPL13 PE=1 SV=4	RPL13	1	1.82024e-22	165.64	NK(1)STESLQANVQR	2	-0.30415	1	0.899	0.848	0.823	1.033	1.165	1.108	1.286	0.004442
P26440	78	K	Isovaleryl-CoA dehydrogenase, mitochondrial OS=Homo sapiens OX=9606 GN=IVD PE=1 SV=2	IVD	1	0.035974	67.881	SNEFK(1)NLR	2	-1.7822	1	1.206	1.234	1.292	0.823	0.848	0.851	0.676	6.4077e-05
P26447	35	K	Protein S100-A4 OS=Homo sapiens OX=9606 GN=S100A4 PE=1 SV=1	S100A4	1	0.0154232	71.085	SELK(1)ELLTR	2	-0.070637	1	1.015	1.034	1.08	0.96	1.035	0.936	0.937	0.135562
P26447	31	K	Protein S100-A4 OS=Homo sapiens OX=9606 GN=S100A4 PE=1 SV=1	S100A4	1	0.00658615	83.783	LNK(1)SELK	3	0.046814	2	1.112	0.949	0.965	1.053	1.014	0.944	0.995	0.95696
P26447	48	K	Protein S100-A4 OS=Homo sapiens OX=9606 GN=S100A4 PE=1 SV=1	S100A4	1	0.000501136	96.034	ELPSFLGK(1)R	2	0.66184	2	1.047	1.1	1.061	0.904	0.92	1.046	0.895	0.078939
P26583	8	K	High mobility group protein B2 OS=Homo sapiens OX=9606 GN=HMGB2 PE=1 SV=2	HMGB2	1	0.0108931	89.296	GDPNK(1)PR	2	-0.20822	2	0.798	0.804	0.789	1.165	1.084	1.179	1.434	0.000179269
P26583	3	K	High mobility group protein B2 OS=Homo sapiens OX=9606 GN=HMGB2 PE=1 SV=2	HMGB2	0.999989	0.00434355	72.928	GK(1)GDPNKPR	3	-2.3564	2	0.457	0.487	0.444	1.378	1.343	1.382	2.956	1.481e-06
P26583	114	K	High mobility group protein B2 OS=Homo sapiens OX=9606 GN=HMGB2 PE=1 SV=2	HMGB2	1	0.000235222	71.143	IK(1)SEHPGLSIGDTAK	3	0.33304	1	1.004	0.971	0.898	0.995	1.053	1.054	1.08	0.112341
P26583	167	K	High mobility group protein B2 OS=Homo sapiens OX=9606 GN=HMGB2 PE=1 SV=2	HMGB2	1	0.0235329	83.783	GK(1)SEAGK	2	-0.13812	1	0.735	0.811	0.811	1.171	1.082	1.194	1.462	0.00103598
P26583	82	K	High mobility group protein B2 OS=Homo sapiens OX=9606 GN=HMGB2 PE=1 SV=2	HMGB2	1	0.00971274	58.699	NYVPPK(1)GDK	3	0.95445	1	0.724	0.778	0.814	1.017	1.331	1.121	1.498	0.0096399
P26599	402	K	Polypyrimidine tract-binding protein 1 OS=Homo sapiens OX=9606 GN=PTBP1 PE=1 SV=1	PTBP1	1	0.0127523	71.852	LHGK(1)PIR	3	-0.9302	1	1.167	1.048	0.902	1.032	0.937	0.979	0.946	0.5573
P26599	137	K	Polypyrimidine tract-binding protein 1 OS=Homo sapiens OX=9606 GN=PTBP1 PE=1 SV=1	PTBP1	1	1.2178e-06	116.51	ELK(1)TDSSPNQAR	3	-1.6992	2	0.749	0.866	0.909	1.143	1.137	1.056	1.322	0.0113999
P26599	271	K	Polypyrimidine tract-binding protein 1 OS=Homo sapiens OX=9606 GN=PTBP1 PE=1 SV=1	PTBP1	1	0.0165326	90.601	YNNDK(1)SR	2	1.3504	1	0.822	0.816	0.869	1.072	1.173	1.102	1.335	0.00096318
P26599	482	K	Polypyrimidine tract-binding protein 1 OS=Homo sapiens OX=9606 GN=PTBP1 PE=1 SV=1	PTBP1	1	0.00637373	85.909	VLFSSNGGVVK(1)GFK	2	0.50674	1	0.885	0.88	0.874	1.077	1.047	1.136	1.235	0.0129196
P26599	528	K	Polypyrimidine tract-binding protein 1 OS=Homo sapiens OX=9606 GN=PTBP1 PE=1 SV=1	PTBP1	1	0.0176487	78.77	VSFSK(1)STI	2	0.49627	2	0.97	0.894	1.129	1.004	1.034	0.982	1.009	0.85666
P26599	259	K	Polypyrimidine tract-binding protein 1 OS=Homo sapiens OX=9606 GN=PTBP1 PE=1 SV=1	PTBP1	1	7.49998e-08	130.2	IDFSK(1)LTSLNVK	2	0.026903	2	0.869	0.909	0.897	1.066	1.074	1.095	1.209	0.00025865
P26599	266	K	Polypyrimidine tract-binding protein 1 OS=Homo sapiens OX=9606 GN=PTBP1 PE=1 SV=1	PTBP1	1	1.88993e-07	125.97	LTSLNVK(1)YNNDK	2	0.32805	1	0.87	0.921	0.908	1.132	1.04	1.05	1.194	0.0051389
P26599	485	K	Polypyrimidine tract-binding protein 1 OS=Homo sapiens OX=9606 GN=PTBP1 PE=1 SV=1	PTBP1	1	0.0176118	89.55	GFK(1)FFQK	2	-0.77986	1	0.903	0.893	0.941	1.041	1.084	1.068	1.167	0.00147732
P26639	319	K	Threonine--tRNA ligase 1, cytoplasmic OS=Homo sapiens OX=9606 GN=TARS1 PE=1 SV=3	TARS1	1	0.0413599	65.933	FQEEAK(1)NR	2	-0.73812	1	1.109	1.048	1.132	1.005	0.909	0.914	0.86	0.0191602
P26639	636	K	Threonine--tRNA ligase 1, cytoplasmic OS=Homo sapiens OX=9606 GN=TARS1 PE=1 SV=3	TARS1	1	4.29713e-29	145.91	QVMVVPVGPTCDEYAQK(1)VR	3	0.2778	2	1.133	1.145	1.187	0.852	0.969	0.88	0.78	0.0036816
P26639	583	K	Threonine--tRNA ligase 1, cytoplasmic OS=Homo sapiens OX=9606 GN=TARS1 PE=1 SV=3	TARS1	1	3.86402e-18	153.23	FNLTYVSHDGDDK(1)K	3	-0.5197	1	1.022	1.011	1.112	0.972	0.968	0.979	0.928	0.135443
P26639	279	K	Threonine--tRNA ligase 1, cytoplasmic OS=Homo sapiens OX=9606 GN=TARS1 PE=1 SV=3	TARS1	1	0.000861059	72.29	IHK(1)NSSTYWEGK	3	-1.3577	1	0.936	0.922	1.159	0.936	0.98	1.08	0.993	0.97182
P26639	223	K	Threonine--tRNA ligase 1, cytoplasmic OS=Homo sapiens OX=9606 GN=TARS1 PE=1 SV=3	TARS1	1	0.00445977	82.489	K(1)ETLLAMFK	2	-1.103	1	1.164	1.183	1.249	0.907	0.855	0.855	0.728	0.0003974
P26639	313	K	Threonine--tRNA ligase 1, cytoplasmic OS=Homo sapiens OX=9606 GN=TARS1 PE=1 SV=3	TARS1	1	6.85954e-08	144.57	EWEK(1)FQEEAK	2	0.83027	2	1.131	1.157	1.197	0.916	0.89	0.885	0.772	0.000196152
P26640	560	K	Valine--tRNA ligase OS=Homo sapiens OX=9606 GN=VARS PE=1 SV=4	VARS	1	0.0448077	44.395	YQHLK(1)GK	3	-0.18128	1	1.021	1.119	1.101	1.012	0.953	0.893	0.882	0.051161
P26640	1230	K	Valine--tRNA ligase OS=Homo sapiens OX=9606 GN=VARS PE=1 SV=4	VARS	1	1.07827e-06	82.609	AASGYPVK(1)VPLEVQEADEAK	3	1.1782	1	0.984	0.955	0.989	0.973	0.994	1.094	1.045	0.315
P26640	507	K	Valine--tRNA ligase OS=Homo sapiens OX=9606 GN=VARS PE=1 SV=4	VARS	1	8.9072e-05	104.24	TLLSVPGYK(1)EK	2	-0.7353	1	0.925	1.095	1.118	1.012	0.968	0.941	0.931	0.34178
P26641	294	K	Elongation factor 1-gamma OS=Homo sapiens OX=9606 GN=EEF1G PE=1 SV=3	EEF1G	1	2.29957e-08	144.65	STFVLDEFK(1)R	3	0.4116	2	1.02	1.009	1.144	0.933	1.039	0.927	0.914	0.174455
P26641	434	K	Elongation factor 1-gamma OS=Homo sapiens OX=9606 GN=EEF1G PE=1 SV=3	EEF1G	1	4.74196e-07	145.72	AFNQGK(1)IFK	3	-0.085936	4	1.213	1.161	1.142	0.906	0.889	0.879	0.761	0.000163536
P26641	219	K	Elongation factor 1-gamma OS=Homo sapiens OX=9606 GN=EEF1G PE=1 SV=3	EEF1G	1	0.00515729	98.048	MAQFDAK(1)K	2	3.4604	3	1.101	1.11	1.065	0.925	0.953	0.954	0.864	0.00084497
P26641	227	K	Elongation factor 1-gamma OS=Homo sapiens OX=9606 GN=EEF1G PE=1 SV=3	EEF1G	1	0.00581372	94.85	FAETQPK(1)K	2	-0.86111	1	1.081	1.095	1.056	0.892	0.997	0.969	0.884	0.02402
P26641	208	K	Elongation factor 1-gamma OS=Homo sapiens OX=9606 GN=EEF1G PE=1 SV=3	EEF1G	1	3.34773e-05	113.24	AVLGEVK(1)LCEK	2	-0.71656	2	0.982	1.252	1.079	0.874	0.998	0.927	0.845	0.109525
P26641	220	K	Elongation factor 1-gamma OS=Homo sapiens OX=9606 GN=EEF1G PE=1 SV=3	EEF1G	1	0.00303036	109.66	K(1)FAETQPK	3	-0.37032	2	1.147	1.133	1.129	0.932	0.896	0.914	0.804	6.0248e-05
P26641	285	K	Elongation factor 1-gamma OS=Homo sapiens OX=9606 GN=EEF1G PE=1 SV=3	EEF1G	1	0.000263333	57.936	DPFAHLPK(1)STFVLDEFK	3	1.3483	1	0.902	0.912	0.781	1.143	1.177	0.978	1.271	0.034923
P26651	105	K	mRNA decay activator protein ZFP36 OS=Homo sapiens OX=9606 GN=ZFP36 PE=1 SV=1	ZFP36	1	0.0279074	68.224	YK(1)TELCR	2	-0.059912	1
P26885	36	K	Peptidyl-prolyl cis-trans isomerase FKBP2 OS=Homo sapiens OX=9606 GN=FKBP2 PE=1 SV=2	FKBP2	1	0.00979283	100.19	LQIGVK(1)K	2	0.05859	1	1.063	0.966	1.008	1.048	0.973	0.978	0.987	0.75176
P26885	45	K	Peptidyl-prolyl cis-trans isomerase FKBP2 OS=Homo sapiens OX=9606 GN=FKBP2 PE=1 SV=2	FKBP2	1	0.00765264	61.344	RVDHCPIK(1)SR	4	0.83732	1	1.205	1.076	1.234	0.907	0.865	0.902	0.761	0.0037368
P26885	101	K	Peptidyl-prolyl cis-trans isomerase FKBP2 OS=Homo sapiens OX=9606 GN=FKBP2 PE=1 SV=2	FKBP2	1	0.000115557	89.506	GWDQGLLGMCEGEK(1)R	3	-1.1807	1	1.001	0.968	0.888	0.992	1.174	0.95	1.091	0.31948
P27144	179	K	Adenylate kinase 4, mitochondrial OS=Homo sapiens OX=9606 GN=AK4 PE=1 SV=1	AK4	1	0.01377	50.354	DVAK(1)PVIELYK	3	-0.044041	1	0.931	1.213	1.108	0.845	1.033	0.957	0.872	0.23824
P27338	93	K	Amine oxidase [flavin-containing] B OS=Homo sapiens OX=9606 GN=MAOB PE=1 SV=3	MAOB	1	0.00536532	77.058	LIHHVK(1)GK	3	-0.16381	2	0.895	0.966	0.896	1.07	1.04	1.071	1.154	0.0060411
P27338	95	K	Amine oxidase [flavin-containing] B OS=Homo sapiens OX=9606 GN=MAOB PE=1 SV=3	MAOB	1	0.0280241	80.438	GK(1)SYPFR	2	0.45503	1	0.994	0.937	0.902	1.096	1.009	1.032	1.107	0.052885
P27348	120	K	14-3-3 protein theta OS=Homo sapiens OX=9606 GN=YWHAQ PE=1 SV=1	YWHAQ	1	0.00640559	105.39	VFYLK(1)MK	3	-1.34	3	1.116	1.015	1	1.001	0.97	0.964	0.937	0.154662
P27348	49	K	14-3-3 protein theta OS=Homo sapiens OX=9606 GN=YWHAQ PE=1 SV=1	YWHAQ	1	1.51075e-05	98.592	NLLSVAYK(1)NVVGGR	3	-0.12989	3	0.885	0.92	0.971	1.02	1.076	1.068	1.14	0.0143016
P27348	9	K	14-3-3 protein theta OS=Homo sapiens OX=9606 GN=YWHAQ PE=1 SV=1	YWHAQ	1	0.00162434	113.62	TELIQK(1)AK	3	-0.14622	2	0.966	1.033	0.977	1.013	1.015	1.005	1.019	0.4522
P27348	115	K	14-3-3 protein theta OS=Homo sapiens OX=9606 GN=YWHAQ PE=1 SV=1	YWHAQ	1	4.54835e-09	109.07	YLIANATNPESK(1)VFYLK	3	-0.21874	1	0.978	0.959	1.003	1.004	0.988	1.066	1.04	0.21548
P27635	74	K	60S ribosomal protein L10 OS=Homo sapiens OX=9606 GN=RPL10 PE=1 SV=4	RPL10	1	0.0010908	113.62	ICANK(1)YMVK	2	-0.70699	2	1.297	1.279	1.415	0.779	0.794	0.777	0.589	8.0991e-05
P27635	198	K	60S ribosomal protein L10 OS=Homo sapiens OX=9606 GN=RPL10 PE=1 SV=4	RPL10	1	1.06706e-17	153.32	LIPDGCGVK(1)YIPNR	3	0.22348	2	1.635	1.687	1.667	0.596	0.522	0.562	0.337	1.50924e-05
P27635	13	K	60S ribosomal protein L10 OS=Homo sapiens OX=9606 GN=RPL10 PE=1 SV=4	RPL10	0.999589	0.00139961	82.287	YCK(1)NKPYPK	3	-0.19986	2	1.211	1.161	1.214	0.983	0.819	0.83	0.734	0.0066638
P27635	188	K	60S ribosomal protein L10 OS=Homo sapiens OX=9606 GN=RPL10 PE=1 SV=4	RPL10	1	0.0127353	41.088	FNADEFEDMVAEK(1)R	3	0.49367	1	1.231	1.117	1.172	0.914	0.908	0.851	0.759	0.00160082
P27635	78	K	60S ribosomal protein L10 OS=Homo sapiens OX=9606 GN=RPL10 PE=1 SV=4	RPL10	1	0.014499	80.688	YMVK(1)SCGK	3	-0.020588	3	1.309	1.289	1.296	0.83	0.786	0.803	0.621	4.2577e-06
P27694	163	K	Replication protein A 70 kDa DNA-binding subunit OS=Homo sapiens OX=9606 GN=RPA1 PE=1 SV=2	RPA1	1	9.99335e-08	143.97	AYGASK(1)TFGK	3	1.1683	2	0.616	0.618	0.6	1.341	1.243	1.224	2.076	1.81648e-05
P27694	577	K	Replication protein A 70 kDa DNA-binding subunit OS=Homo sapiens OX=9606 GN=RPA1 PE=1 SV=2	RPA1	1	1.00681e-07	133.16	VK(1)VETYNDESR	2	0.84162	1	1.041	1.06	1.071	1.022	0.903	0.979	0.916	0.073984
P27695	63	K	DNA-(apurinic or apyrimidinic site) lyase OS=Homo sapiens OX=9606 GN=APEX1 PE=1 SV=2	APEX1	1	0.000575662	60.489	PATLK(1)ICSWNVDGLR	3	0.3745	1	1.152	1.124	0.988	0.984	0.912	0.948	0.871	0.060456
P27708	1325	K	CAD protein OS=Homo sapiens OX=9606 GN=CAD PE=1 SV=3	CAD	1	0.0215402	63.091	NK(1)SELLPTVR	2	0.31054	1	0.911	0.866	0.924	1.009	1.114	1.093	1.191	0.0085646
P27708	1313	K	CAD protein OS=Homo sapiens OX=9606 GN=CAD PE=1 SV=3	CAD	1	0.00205079	72.29	K(1)NILLTIGSYK	3	0.2588	1
P27708	1961	K	CAD protein OS=Homo sapiens OX=9606 GN=CAD PE=1 SV=3	CAD	1	0.0247191	74.464	SLDILK(1)GK	2	-1.3489	1	1.016	1.078	0.929	1.062	1.009	0.937	0.995	0.94124
P27708	2036	K	CAD protein OS=Homo sapiens OX=9606 GN=CAD PE=1 SV=3	CAD	1	0.000174925	72.898	HPQPGAVELAAK(1)HCR	4	-0.2024	1	1.242	1.003	1.053	0.88	0.971	0.97	0.855	0.102217
P27797	159	K	Calreticulin OS=Homo sapiens OX=9606 GN=CALR PE=1 SV=1	CALR	1	0.00389715	84.054	NVLINK(1)DIR	3	-0.90682	3	1.186	1.207	1.155	0.888	0.894	0.867	0.747	5.5335e-05
P27797	238	K	Calreticulin OS=Homo sapiens OX=9606 GN=CALR PE=1 SV=1	CALR	0.999592	3.66715e-08	74.876	IDDPTDSKPEDWDK(1)PEHIPDPDAK	4	-0.74283	2	0.889	0.892	1.029	0.962	1.155	1.022	1.117	0.20184
P27797	64	K	Calreticulin OS=Homo sapiens OX=9606 GN=CALR PE=1 SV=1	CALR	1	6.2203e-05	106.58	DK(1)GLQTSQDAR	2	1.0836	1	0.927	0.86	0.879	1.197	0.986	1.069	1.22	0.031659
P27797	41	K	Calreticulin OS=Homo sapiens OX=9606 GN=CALR PE=1 SV=1	CALR	1	0.00544681	86.472	WIESK(1)HK	2	-2.2141	2	0.795	0.792	0.801	1.151	1.167	1.113	1.437	1.75283e-05
P27797	48	K	Calreticulin OS=Homo sapiens OX=9606 GN=CALR PE=1 SV=1	CALR	1	4.08038e-05	104.95	SDFGK(1)FVLSSGK	2	-1.5654	1	0.995	0.981	0.987	1.052	1.04	0.955	1.028	0.4723
P27797	153	K	Calreticulin OS=Homo sapiens OX=9606 GN=CALR PE=1 SV=1	CALR	1	0.00290625	109.71	GK(1)NVLINK	3	-0.28283	2	1.029	0.988	0.995	1.04	0.995	0.978	1	0.99482
P27797	151	K	Calreticulin OS=Homo sapiens OX=9606 GN=CALR PE=1 SV=1	CALR	1	4.85382e-06	128.36	VHVIFNYK(1)GK	3	3.4505	1	1.092	1.115	1.082	0.926	0.934	0.961	0.858	0.00042363
P27797	224	K	Calreticulin OS=Homo sapiens OX=9606 GN=CALR PE=1 SV=1	CALR	0.998451	7.75167e-05	55.158	AK(0.998)IDDPTDSK(0.001)PEDWDKPEHIPDPDAK	5	0.47615	1	0.95	0.886	0.876	1.127	1.02	1.07	1.186	0.0112838
P27797	43	K	Calreticulin OS=Homo sapiens OX=9606 GN=CALR PE=1 SV=1	CALR	1	0.00317201	95.531	HK(1)SDFGK	3	0.28281	1	0.826	0.861	0.91	1.122	1.069	1.097	1.266	0.00165616
P27797	62	K	Calreticulin OS=Homo sapiens OX=9606 GN=CALR PE=1 SV=1	CALR	1	0.00513838	80.706	FYGDEEK(1)DK	2	-3.3578	1	1.059	1.158	1.247	0.839	1.029	0.831	0.779	0.040085
P27797	55	K	Calreticulin OS=Homo sapiens OX=9606 GN=CALR PE=1 SV=1	CALR	1	2.60084e-12	123.14	FVLSSGK(1)FYGDEEK	3	-0.046773	3	0.895	0.865	0.953	1.099	1.061	1.053	1.184	0.0055849
P27816	933	K	Microtubule-associated protein 4 OS=Homo sapiens OX=9606 GN=MAP4 PE=1 SV=3	MAP4	1	0.000456705	67.136	LATNTSAPDLK(1)NVR	3	0.90795	1	1.057	0.922	0.947	1.079	1.021	0.976	1.051	0.37364
P27816	946	K	Microtubule-associated protein 4 OS=Homo sapiens OX=9606 GN=MAP4 PE=1 SV=3	MAP4	1	0.000238119	69.045	VGSTENIK(1)HQPGGGR	3	0.5921	1	0.955	1.078	0.964	1.003	1.037	0.978	1.007	0.85578
P27816	1015	K	Microtubule-associated protein 4 OS=Homo sapiens OX=9606 GN=MAP4 PE=1 SV=3	MAP4	1	0.000205688	60.734	DNIK(1)HVPGGGNVQIQNK	3	-2.5631	1	0.908	0.909	0.876	1.135	0.943	1.148	1.198	0.052801
P27824	170	K	Calnexin OS=Homo sapiens OX=9606 GN=CANX PE=1 SV=2	CANX	1	0.000177815	81.346	LLSK(1)TPELNLDQFHDK	3	-1.1632	1	0.873	0.853	0.91	1.081	1.135	1.048	1.238	0.002043
P27824	516	K	Calnexin OS=Homo sapiens OX=9606 GN=CANX PE=1 SV=2	CANX	1	0.0104619	72.29	K(1)TDAPQPDVK	2	0.69677	1	0.938	1.071	1.067	0.905	1.079	0.974	0.962	0.5844
P27824	398	K	Calnexin OS=Homo sapiens OX=9606 GN=CANX PE=1 SV=2	CANX	1	6.44494e-05	75.564	WKPPMIDNPSYQGIWK(1)PR	3	3.2154	1	1.155	1.163	1.272	0.883	0.868	0.868	0.73	0.00057642
P27824	127	K	Calnexin OS=Homo sapiens OX=9606 GN=CANX PE=1 SV=2	CANX	1	0.00141641	99.283	AK(1)HHAISAK	3	-0.35089	6	0.866	0.909	0.852	1.121	1.094	1.056	1.245	0.00109514
P27824	217	K	Calnexin OS=Homo sapiens OX=9606 GN=CANX PE=1 SV=2	CANX	1	0.00443354	67.08	TGIYEEK(1)HAK	4	0.82363	3	0.879	0.944	0.903	1.062	1.054	1.084	1.174	0.0020043
P27824	227	K	Calnexin OS=Homo sapiens OX=9606 GN=CANX PE=1 SV=2	CANX	1	1.13069e-07	117.7	RPDADLK(1)TYFTDK	3	0.20606	1	0.848	0.77	0.71	1.177	1.136	1.162	1.493	0.00153642
P27824	87	K	Calnexin OS=Homo sapiens OX=9606 GN=CANX PE=1 SV=2	CANX	1	0.014782	46.88	GTLSGWILSK(1)AK	3	-0.67335	1	0.807	0.786	0.712	1.226	1.112	1.152	1.514	0.00095527
P27824	380	K	Calnexin OS=Homo sapiens OX=9606 GN=CANX PE=1 SV=2	CANX	1	4.47018e-06	125.97	PVIDNPNYK(1)GK	2	-0.75576	2	0.906	1.098	0.828	1.055	0.951	1.122	1.105	0.34
P27824	233	K	Calnexin OS=Homo sapiens OX=9606 GN=CANX PE=1 SV=2	CANX	1	9.80634e-07	145.04	TYFTDK(1)K	2	-0.45764	2	0.944	0.933	0.935	0.99	1.025	1.124	1.116	0.103996
P27824	210	K	Calnexin OS=Homo sapiens OX=9606 GN=CANX PE=1 SV=2	CANX	1	1.00459e-07	124.12	NPK(1)TGIYEEK	2	0.61299	4	0.864	0.912	0.854	1.121	1.082	1.064	1.242	0.00103649
P27824	283	K	Calnexin OS=Homo sapiens OX=9606 GN=CANX PE=1 SV=2	CANX	1	0.00943694	58.172	K(1)PEDWDERPK	3	-0.057395	1	0.752	0.853	1.155	0.912	1.233	1.019	1.146	0.40096
P27824	458	K	Calnexin OS=Homo sapiens OX=9606 GN=CANX PE=1 SV=2	CANX	1	0.000467442	71.933	IVDDWANDGWGLK(1)K	3	-0.75588	1	1.064	1.012	1.004	0.99	0.975	1	0.963	0.126264
P27824	199	K	Calnexin OS=Homo sapiens OX=9606 GN=CANX PE=1 SV=2	CANX	1	0.00512375	54.199	CGEDYK(1)LHFIFR	3	0.13836	1	1.113	1.117	1.135	0.96	0.928	0.886	0.824	0.00128234
P27824	137	K	Calnexin OS=Homo sapiens OX=9606 GN=CANX PE=1 SV=2	CANX	1	6.55209e-05	119.39	LNK(1)PFLFDTK	2	-0.66305	1	0.911	0.904	0.982	1.053	1.037	1.064	1.128	0.0116633
P27824	103	K	Calnexin OS=Homo sapiens OX=9606 GN=CANX PE=1 SV=2	CANX	1	0.00017866	96.464	YDGK(1)WEVEEMK	2	0.7064	2	0.808	0.8	0.785	1.196	1.096	1.137	1.433	0.000178236
P27824	382	K	Calnexin OS=Homo sapiens OX=9606 GN=CANX PE=1 SV=2	CANX	0.996394	1.29514e-09	113.88	GK(0.996)WK(0.004)PPMIDNPSYQGIWK	3	-1.0396	2	1.215	1.261	1.309	0.858	0.805	0.825	0.657	0.000121315
P28066	192	K	Proteasome subunit alpha type-5 OS=Homo sapiens OX=9606 GN=PSMA5 PE=1 SV=3	PSMA5	1	0.00142316	101.39	SMTLK(1)EAIK	3	-0.61162	2	0.996	1.026	0.938	1.042	0.982	1.022	1.029	0.41068
P28072	67	K	Proteasome subunit beta type-6 OS=Homo sapiens OX=9606 GN=PSMB6 PE=1 SV=4	PSMB6	1	0.024175	43.761	VTDK(1)LTPIHDR	3	1.2353	1	1.196	0.92	0.932	1.07	0.913	1.015	0.984	0.91378
P28288	405	K	ATP-binding cassette sub-family D member 3 OS=Homo sapiens OX=9606 GN=ABCD3 PE=1 SV=1	ABCD3	1	0.000822647	87.123	DLNHGK(1)YER	3	0.36621	2	0.936	0.882	0.924	0.984	1.046	1.155	1.162	0.041764
P28290	308	K	Protein ITPRID2 OS=Homo sapiens OX=9606 GN=ITPRID2 PE=1 SV=3	ITPRID2	1	0.000743272	91.202	LNLCVDK(1)TEK	2	1.1638	1	1.486	1.318	1.355	0.733	0.798	0.712	0.539	0.00024228
P28347	370	K	Transcriptional enhancer factor TEF-1 OS=Homo sapiens OX=9606 GN=TEAD1 PE=1 SV=2	TEAD1	1	0.0292686	54.157	LK(1)HLPEK	3	0.21831	1	1.08	1.119	1.121	1.02	0.947	0.841	0.846	0.041337
P28838	221	K	Cytosol aminopeptidase OS=Homo sapiens OX=9606 GN=LAP3 PE=1 SV=3	LAP3	1	0.00144738	77.662	FAEIIEK(1)NLK	3	0.33326	1
P28838	476	K	Cytosol aminopeptidase OS=Homo sapiens OX=9606 GN=LAP3 PE=1 SV=3	LAP3	1	0.00426403	41.615	EFVTHPK(1)WAHLDIAGVMTNK	4	0.7615	1
P29034	27	K	Protein S100-A2 OS=Homo sapiens OX=9606 GN=S100A2 PE=1 SV=3	S100A2	1	7.54754e-06	131.17	YSCQEGDK(1)FK	2	-1.6461	4	1.529	1.5	1.501	0.671	0.667	0.652	0.439	8.7961e-08
P29083	106	K	General transcription factor IIE subunit 1 OS=Homo sapiens OX=9606 GN=GTF2E1 PE=1 SV=2	GTF2E1	1	0.00439746	90.37	YK(1)LDHMR	3	-0.081918	1	0.891	1.048	0.938	1.099	1.023	0.981	1.079	0.25762
P29144	708	K	Tripeptidyl-peptidase 2 OS=Homo sapiens OX=9606 GN=TPP2 PE=1 SV=4	TPP2	1	0.000507625	69.92	SHEFYK(1)FCSLPEK	3	-0.13717	1	0.886	0.855	0.88	1.152	1.085	1.041	1.251	0.0020759
P29144	1117	K	Tripeptidyl-peptidase 2 OS=Homo sapiens OX=9606 GN=TPP2 PE=1 SV=4	TPP2	1	0.000137121	100.07	QK(1)STLVDALCR	2	2.8883	1	0.965	0.999	0.971	1.029	1.037	0.995	1.043	0.064421
P29279	282	K	CCN family member 2 OS=Homo sapiens OX=9606 GN=CCN2 PE=1 SV=2	CCN2	1	0.0259201	54.772	AK(1)FCGVCTDGR	2	-0.55167	1	0.808	0.763	0.789	1.15	1.149	1.152	1.462	0.0019045
P29401	6	K	Transketolase OS=Homo sapiens OX=9606 GN=TKT PE=1 SV=3	TKT	1	0.000786823	77.744	MESYHK(1)PDQQK	3	-4.0442	2	0.89	0.893	0.915	1.072	1.109	1.038	1.193	0.00110124
P29401	204	K	Transketolase OS=Homo sapiens OX=9606 GN=TKT PE=1 SV=3	TKT	1	5.1096e-15	126.4	LGQSDPAPLQHQMDIYQK(1)R	3	0.61046	3	1.097	1.124	1.18	0.919	0.937	0.889	0.807	0.00125627
P29401	310	K	Transketolase OS=Homo sapiens OX=9606 GN=TKT PE=1 SV=3	TKT	1	3.83886e-07	119.87	MPSLPSYK(1)VGDK	2	0.80482	1	0.864	0.936	0.907	1.104	1.044	1.068	1.188	0.0036976
P29401	283	K	Transketolase OS=Homo sapiens OX=9606 GN=TKT PE=1 SV=3	TKT	1	1.52026e-05	65.887	K(1)ILATPPQEDAPSVDIANIR	3	0.18279	1	0.831	0.619	0.709	1.16	1.07	1.353	1.66	0.0096592
P29401	241	K	Transketolase OS=Homo sapiens OX=9606 GN=TKT PE=1 SV=3	TKT	1	2.6318e-13	146.96	HQPTAIIAK(1)TFK	3	1.4828	5	0.996	1.001	0.966	1.014	1.046	0.984	1.027	0.26838
P29401	465	K	Transketolase OS=Homo sapiens OX=9606 GN=TKT PE=1 SV=3	TKT	1	8.54772e-17	140.77	AVELAANTK(1)GICFIR	2	-0.015525	2	1.381	1.245	1.309	0.783	0.818	0.791	0.608	0.000104734
P29401	59	K	Transketolase OS=Homo sapiens OX=9606 GN=TKT PE=1 SV=3	TKT	1	0.00862696	101.54	YK(1)SQDPR	2	-0.14293	4	0.934	0.936	0.895	1.095	1.03	1.054	1.15	0.0037642
P29401	352	K	Transketolase OS=Homo sapiens OX=9606 GN=TKT PE=1 SV=3	TKT	1	7.58687e-10	147.24	NSTFSEIFK(1)K	2	1.3816	6	0.928	0.96	0.967	1.068	1.031	1.016	1.091	0.0111045
P29401	144	K	Transketolase OS=Homo sapiens OX=9606 GN=TKT PE=1 SV=3	TKT	1	0.00199313	118.67	YFDK(1)ASYR	2	-0.51036	2	1.164	1.132	1.119	0.919	0.888	0.932	0.802	0.00028235
P29401	232	K	Transketolase OS=Homo sapiens OX=9606 GN=TKT PE=1 SV=3	TKT	1	4.53618e-35	182.7	AFGQAK(1)HQPTAIIAK	3	2.1746	7	1.055	1.001	1.014	1.012	0.964	0.997	0.968	0.20782
P29692	17	K	Elongation factor 1-delta OS=Homo sapiens OX=9606 GN=EEF1D PE=1 SV=5	EEF1D	1	0.00724519	91.658	FK(1)YDDAER	2	-0.81221	2	1.02	0.908	0.913	1.057	1.084	0.991	1.102	0.101379
P29692	15	K	Elongation factor 1-delta OS=Homo sapiens OX=9606 GN=EEF1D PE=1 SV=5	EEF1D	1	0.0133438	91.318	IWFDK(1)FK	3	-0.81089	2	0.848	0.951	0.956	1.073	1.035	1.071	1.154	0.024024
P30040	54	K	Endoplasmic reticulum resident protein 29 OS=Homo sapiens OX=9606 GN=ERP29 PE=1 SV=4	ERP29	1	0.0197409	87.476	SK(1)FVLVK	2	0.30137	1	1.024	1.018	0.949	1.043	1.034	0.952	1.013	0.7609
P30040	107	K	Endoplasmic reticulum resident protein 29 OS=Homo sapiens OX=9606 GN=ERP29 PE=1 SV=4	ERP29	1	0.00422694	66.56	LNMELSEK(1)YK	3	0.72322	1
P30041	209	K	Peroxiredoxin-6 OS=Homo sapiens OX=9606 GN=PRDX6 PE=1 SV=3	PRDX6	1	0.0105552	52.391	GVFTK(1)ELPSGK	3	0.41337	1	1.012	0.983	0.983	0.976	1.095	0.961	1.018	0.71882
P30041	215	K	Peroxiredoxin-6 OS=Homo sapiens OX=9606 GN=PRDX6 PE=1 SV=3	PRDX6	1	0.0237747	81.296	ELPSGK(1)K	3	-1.5292	2	0.803	0.738	0.744	1.195	1.168	1.139	1.533	0.000142773
P30041	141	K	Peroxiredoxin-6 OS=Homo sapiens OX=9606 GN=PRDX6 PE=1 SV=3	PRDX6	1	0.00036314	106.62	VVFVFGPDK(1)K	2	-1.0356	2	0.766	0.805	0.775	1.133	1.156	1.166	1.473	2.1617e-05
P30041	125	K	Peroxiredoxin-6 OS=Homo sapiens OX=9606 GN=PRDX6 PE=1 SV=3	PRDX6	1	0.00296572	80.69	DEK(1)GMPVTAR	2	0.21529	1	0.848	0.951	0.901	1.167	1.011	1.046	1.194	0.031679
P30044	116	K	Peroxiredoxin-5, mitochondrial OS=Homo sapiens OX=9606 GN=PRDX5 PE=1 SV=4	PRDX5	1	1.16302e-06	105.28	THLPGFVEQAEALK(1)AK	4	-0.40313	2	1.024	1.121	1.004	1.005	0.939	0.974	0.927	0.126762
P30044	83	K	Peroxiredoxin-5, mitochondrial OS=Homo sapiens OX=9606 GN=PRDX5 PE=1 SV=4	PRDX5	1	0.000283292	110.08	VNLAELFK(1)GK	2	0.26735	2	1.281	1.303	1.236	0.816	0.818	0.833	0.646	1.6579e-05
P30044	142	K	Peroxiredoxin-5, mitochondrial OS=Homo sapiens OX=9606 GN=PRDX5 PE=1 SV=4	PRDX5	1	0.0255254	57.281	AHK(1)AEGK	3	-1.4207	1	1.323	1.52	1.156	0.73	0.752	0.858	0.585	0.004678
P30046	21	K	D-dopachrome decarboxylase OS=Homo sapiens OX=9606 GN=DDT PE=1 SV=3	DDT	1	0.0134101	82.452	VPAGLEK(1)R	2	1.0636	1	1.669	1.629	1.648	0.641	0.566	0.507	0.347	0.0040648
P30048	91	K	Thioredoxin-dependent peroxide reductase, mitochondrial OS=Homo sapiens OX=9606 GN=PRDX3 PE=1 SV=3	PRDX3	1	7.91137e-05	109.29	DLSLDDFK(1)GK	3	1.8597	1	1.057	1.1	1.01	0.994	0.977	0.938	0.919	0.048
P30050	99	K	60S ribosomal protein L12 OS=Homo sapiens OX=9606 GN=RPL12 PE=1 SV=1	RPL12	1	5.98125e-27	150.91	NIK(1)HSGNITFDEIVNIAR	3	-0.31696	1	1.007	0.983	0.961	1.032	1.04	0.981	1.035	0.21128
P30050	40	K	60S ribosomal protein L12 OS=Homo sapiens OX=9606 GN=RPL12 PE=1 SV=1	RPL12	1	0.00152084	87.184	IGPLGLSPK(1)K	2	-0.4598	1	0.963	0.947	0.961	1.036	1.007	1.061	1.081	0.0082395
P30084	127	K	Enoyl-CoA hydratase, mitochondrial OS=Homo sapiens OX=9606 GN=ECHS1 PE=1 SV=4	ECHS1	1	0.00350825	71.451	HWDHLTQVK(1)K	4	-0.13951	1	1.038	1.06	1.016	1.012	0.923	1.008	0.945	0.152543
P30084	118	K	Enoyl-CoA hydratase, mitochondrial OS=Homo sapiens OX=9606 GN=ECHS1 PE=1 SV=4	ECHS1	1	0.00037185	79.492	FLK(1)HWDHLTQVK	4	0.52727	1	1.267	1.193	1.218	0.874	0.811	0.879	0.697	0.00032262
P30085	88	K	UMP-CMP kinase OS=Homo sapiens OX=9606 GN=CMPK1 PE=1 SV=3	CMPK1	1	0.000228405	95.094	NK(1)FLIDGFPR	2	-0.15976	1	1.021	0.881	1.001	1.045	0.982	1.059	1.063	0.2923
P30085	106	K	UMP-CMP kinase OS=Homo sapiens OX=9606 GN=CMPK1 PE=1 SV=3	CMPK1	1	4.60045e-06	100.43	NQDNLQGWNK(1)TMDGK	3	-1.4642	2	0.89	0.928	0.976	1.001	1.139	1.013	1.128	0.07104
P30085	86	K	UMP-CMP kinase OS=Homo sapiens OX=9606 GN=CMPK1 PE=1 SV=3	CMPK1	1	1.25454e-07	111.12	EMDQTMAANAQK(1)NK	3	-1.3604	1	1.164	1.037	0.916	0.955	1.014	0.975	0.944	0.50178
P30086	47	K	Phosphatidylethanolamine-binding protein 1 OS=Homo sapiens OX=9606 GN=PEBP1 PE=1 SV=3	PEBP1	1	7.91062e-05	86.879	VLTPTQVK(1)NRPTSISWDGLDSGK	3	-0.52602	2	0.807	0.836	0.858	1.077	1.133	1.141	1.34	0.00032263
P30101	104	K	Protein disulfide-isomerase A3 OS=Homo sapiens OX=9606 GN=PDIA3 PE=1 SV=4	PDIA3	1	0.000430548	90.759	YGVSGYPTLK(1)IFR	2	2.1037	1	1.135	1.204	1.259	0.915	0.824	0.876	0.727	0.00171789
P30101	274	K	Protein disulfide-isomerase A3 OS=Homo sapiens OX=9606 GN=PDIA3 PE=1 SV=4	PDIA3	1	0.00218613	90.964	NAK(1)GSNYWR	2	0.17799	1	0.84	0.914	0.932	1.08	1.073	1.075	1.202	0.028617
P30101	130	K	Protein disulfide-isomerase A3 OS=Homo sapiens OX=9606 GN=PDIA3 PE=1 SV=4	PDIA3	1	0.000813241	90.434	K(1)QAGPASVPLR	2	0.24064	1	1.029	0.845	0.93	1.099	1.006	1.051	1.126	0.124616
P30101	289	K	Protein disulfide-isomerase A3 OS=Homo sapiens OX=9606 GN=PDIA3 PE=1 SV=4	PDIA3	1	0.00953104	74.841	K(1)FLDAGHK	2	-0.98101	3	0.932	0.985	0.909	1.059	1.011	1.064	1.109	0.022677
P30101	129	K	Protein disulfide-isomerase A3 OS=Homo sapiens OX=9606 GN=PDIA3 PE=1 SV=4	PDIA3	1	4.71426e-05	110.08	TADGIVSHLK(1)K	2	-0.099653	2	0.864	0.953	0.921	1.006	1.096	1.085	1.164	0.0182812
P30101	288	K	Protein disulfide-isomerase A3 OS=Homo sapiens OX=9606 GN=PDIA3 PE=1 SV=4	PDIA3	1	0.0116674	97.068	VMMVAK(1)K	2	-1.0245	1	1.049	1.14	0.981	0.983	0.947	0.974	0.916	0.128181
P30101	460	K	Protein disulfide-isomerase A3 OS=Homo sapiens OX=9606 GN=PDIA3 PE=1 SV=4	PDIA3	1	0.000154865	90.697	GFPTIYFSPANK(1)K	3	-0.20153	1	0.864	0.89	0.842	1.098	1.145	1.047	1.267	0.00147666
P30101	366	K	Protein disulfide-isomerase A3 OS=Homo sapiens OX=9606 GN=PDIA3 PE=1 SV=4	PDIA3	1	2.8449e-06	102.65	YLK(1)SEPIPESNDGPVK	4	0.61017	3	0.976	1.006	0.952	0.956	1.013	1.088	1.042	0.38182
P30101	494	K	Protein disulfide-isomerase A3 OS=Homo sapiens OX=9606 GN=PDIA3 PE=1 SV=4	PDIA3	1	1.11552e-22	158.91	EATNPPVIQEEK(1)PK	2	-0.21724	3	0.713	0.703	0.767	1.119	1.287	1.158	1.633	0.00061616
P30101	82	K	Protein disulfide-isomerase A3 OS=Homo sapiens OX=9606 GN=PDIA3 PE=1 SV=4	PDIA3	1	6.15521e-11	117.18	GIVPLAK(1)VDCTANTNTCNK	3	-0.14257	4	1.365	1.513	1.526	0.693	0.669	0.704	0.469	4.061e-05
P30101	94	K	Protein disulfide-isomerase A3 OS=Homo sapiens OX=9606 GN=PDIA3 PE=1 SV=4	PDIA3	1	3.5914e-41	161.47	VDCTANTNTCNK(1)YGVSGYPTLK	4	-0.65929	5	1.559	1.492	1.558	0.681	0.625	0.63	0.42	4.8366e-06
P30101	305	K	Protein disulfide-isomerase A3 OS=Homo sapiens OX=9606 GN=PDIA3 PE=1 SV=4	PDIA3	1	2.02854e-08	77.445	K(1)TFSHELSDFGLESTAGEIPVVAIR	4	-1.8513	1
P30101	146	K	Protein disulfide-isomerase A3 OS=Homo sapiens OX=9606 GN=PDIA3 PE=1 SV=4	PDIA3	1	0.0236094	65.803	TEEEFK(1)K	3	0.7158	1
P30101	218	K	Protein disulfide-isomerase A3 OS=Homo sapiens OX=9606 GN=PDIA3 PE=1 SV=4	PDIA3	1	8.50278e-10	136.6	FEDK(1)TVAYTEQK	2	0.01875	2	0.856	0.904	0.904	1.097	1.094	1.054	1.218	0.00089884
P30101	417	K	Protein disulfide-isomerase A3 OS=Homo sapiens OX=9606 GN=PDIA3 PE=1 SV=4	PDIA3	1	0.00933469	77.282	YK(1)ELGEK	3	-2.2915	2	0.919	0.966	1.028	1.083	0.993	1.003	1.057	0.25958
P30101	362	K	Protein disulfide-isomerase A3 OS=Homo sapiens OX=9606 GN=PDIA3 PE=1 SV=4	PDIA3	1	7.87476e-10	137.62	FLQDYFDGNLK(1)R	2	-0.42777	1	0.89	1.01	0.949	1.091	1.059	0.971	1.095	0.145158
P30101	335	K	Protein disulfide-isomerase A3 OS=Homo sapiens OX=9606 GN=PDIA3 PE=1 SV=4	PDIA3	1	0.00152995	81.448	GEK(1)FVMQEEFSR	2	-0.75904	1	0.748	0.789	0.946	1.028	1.205	1.123	1.352	0.022855
P30101	415	K	Protein disulfide-isomerase A3 OS=Homo sapiens OX=9606 GN=PDIA3 PE=1 SV=4	PDIA3	1	0.0215894	85.676	NLEPK(1)YK	3	0.15336	4	1.566	1.535	1.386	0.673	0.669	0.679	0.45	0.0022784
P30153	472	K	Serine/threonine-protein phosphatase 2A 65 kDa regulatory subunit A alpha isoform OS=Homo sapiens OX=9606 GN=PPP2R1A PE=1 SV=4	PPP2R1A	1	0.00862696	101.54	LVEK(1)FGK	2	0.33656	1	1.08	1.111	1.027	0.948	0.929	0.992	0.892	0.0189191
P30153	467	K	Serine/threonine-protein phosphatase 2A 65 kDa regulatory subunit A alpha isoform OS=Homo sapiens OX=9606 GN=PPP2R1A PE=1 SV=4	PPP2R1A	1	0.0014794	100.82	EAATSNLK(1)K	2	0.94915	1	1.013	1.028	1.076	0.982	0.924	1.03	0.942	0.171024
P30153	280	K	Serine/threonine-protein phosphatase 2A 65 kDa regulatory subunit A alpha isoform OS=Homo sapiens OX=9606 GN=PPP2R1A PE=1 SV=4	PPP2R1A	1	1.74314e-11	118.72	AVGPEITK(1)TDLVPAFQNLMK	3	-1.4418	2	1.104	1.207	1.167	0.965	0.849	0.884	0.776	0.0051558
P30153	307	K	Serine/threonine-protein phosphatase 2A 65 kDa regulatory subunit A alpha isoform OS=Homo sapiens OX=9606 GN=PPP2R1A PE=1 SV=4	PPP2R1A	1	0.00485391	52.599	VK(1)EFCENLSADCR	3	-1.3727	1
P30405	73	K	Peptidyl-prolyl cis-trans isomerase F, mitochondrial OS=Homo sapiens OX=9606 GN=PPIF PE=1 SV=1	PPIF	1	0.000395052	81.676	ADVVPK(1)TAENFR	3	1.1445	2	0.969	1.004	0.994	1.025	0.948	1.065	1.024	0.5626
P30405	167	K	Peptidyl-prolyl cis-trans isomerase F, mitochondrial OS=Homo sapiens OX=9606 GN=PPIF PE=1 SV=1	PPIF	1	2.3548e-12	128.76	TDWLDGK(1)HVVFGHVK	4	-0.91174	1	1.141	1.055	1.158	1.03	0.903	0.855	0.831	0.039944
P30419	464	K	Glycylpeptide N-tetradecanoyltransferase 1 OS=Homo sapiens OX=9606 GN=NMT1 PE=1 SV=2	NMT1	1	0.0197409	87.476	TFLEK(1)LK	2	0.42487	1	0.959	0.957	0.91	1.051	1.04	1.044	1.109	0.0039429
P30519	133	K	Heme oxygenase 2 OS=Homo sapiens OX=9606 GN=HMOX2 PE=1 SV=2	HMOX2	1	0.017062	79.128	AAQK(1)YVER	2	0.63827	1	1.37	1.485	1.399	0.656	0.859	0.654	0.51	0.00188412
P30520	118	K	Adenylosuccinate synthetase isozyme 2 OS=Homo sapiens OX=9606 GN=ADSS2 PE=1 SV=3	ADSS2	1	0.00379188	84.479	GK(1)GLEGWEK	2	-0.65863	1	1.034	1.033	1.044	1.02	0.984	0.94	0.946	0.144764
P30533	304	K	Alpha-2-macroglobulin receptor-associated protein OS=Homo sapiens OX=9606 GN=LRPAP1 PE=1 SV=1	LRPAP1	1	0.0258028	60.364	QLEIAHEK(1)LR	2	-2.5819	2	0.932	0.928	0.892	1.057	1.036	1.092	1.157	0.0021411
P30533	180	K	Alpha-2-macroglobulin receptor-associated protein OS=Homo sapiens OX=9606 GN=LRPAP1 PE=1 SV=1	LRPAP1	1	0.00214957	85.676	EFLHHK(1)EK	4	-0.43223	1	0.85	0.967	0.891	0.992	1.059	1.154	1.184	0.043775
P30533	225	K	Alpha-2-macroglobulin receptor-associated protein OS=Homo sapiens OX=9606 GN=LRPAP1 PE=1 SV=1	LRPAP1	1	0.026087	55.531	HTELK(1)EK	3	-4.4045	1
P30533	287	K	Alpha-2-macroglobulin receptor-associated protein OS=Homo sapiens OX=9606 GN=LRPAP1 PE=1 SV=1	LRPAP1	1	0.0123799	63.816	HFEAK(1)IEK	3	0.47793	1	0.945	1.007	1.008	0.987	1.088	0.967	1.028	0.56468
P30533	323	K	Alpha-2-macroglobulin receptor-associated protein OS=Homo sapiens OX=9606 GN=LRPAP1 PE=1 SV=1	LRPAP1	1	0.0110662	56.043	EK(1)HALLEGR	3	-0.92662	1	0.709	0.843	0.95	1.219	0.969	1.163	1.339	0.055477
P30533	290	K	Alpha-2-macroglobulin receptor-associated protein OS=Homo sapiens OX=9606 GN=LRPAP1 PE=1 SV=1	LRPAP1	1	0.0148826	50.353	IEK(1)HNHYQK	4	0.84653	1	1.088	0.887	1.012	1.085	0.898	1.05	1.015	0.86208
P30566	402	K	Adenylosuccinate lyase OS=Homo sapiens OX=9606 GN=ADSL PE=1 SV=2	ADSL	1	0.0109968	85.533	QDCHEK(1)IR	2	-0.15072	2	1.721	1.685	1.818	0.519	0.539	0.464	0.291	1.82115e-05
P30622	1026	K	CAP-Gly domain-containing linker protein 1 OS=Homo sapiens OX=9606 GN=CLIP1 PE=1 SV=2	CLIP1	1	0.000529797	66.059	METSHNQCQELK(1)AR	3	-0.9546	1	1.372	1.211	1.279	0.787	0.883	0.772	0.632	0.00115826
P30740	137	K	Leukocyte elastase inhibitor OS=Homo sapiens OX=9606 GN=SERPINB1 PE=1 SV=1	SERPINB1	1	0.00076773	71.08	TINQWVK(1)GQTEGK	3	-0.97144	2	1.137	1.065	1.11	0.929	0.929	0.951	0.848	0.00134227
P30740	130	K	Leukocyte elastase inhibitor OS=Homo sapiens OX=9606 GN=SERPINB1 PE=1 SV=1	SERPINB1	1	0.0055075	96.342	K(1)TINQWVK	2	0.68312	1	0.927	0.91	0.823	1.031	1.107	1.109	1.221	0.0104848
P30740	203	K	Leukocyte elastase inhibitor OS=Homo sapiens OX=9606 GN=SERPINB1 PE=1 SV=1	SERPINB1	1	1.95781e-06	130.1	K(1)FAYGYIEDLK	2	-0.45938	1	0.769	0.925	0.929	1.069	1.066	1.13	1.245	0.026918
P30740	317	K	Leukocyte elastase inhibitor OS=Homo sapiens OX=9606 GN=SERPINB1 PE=1 SV=1	SERPINB1	1	0.000396555	86.898	DIFISK(1)IVHK	3	-1.3473	1	0.995	0.984	1.015	0.977	0.964	1.076	1.008	0.86424
P30740	56	K	Leukocyte elastase inhibitor OS=Homo sapiens OX=9606 GN=SERPINB1 PE=1 SV=1	SERPINB1	1	1.25776e-05	63.979	GNTAAQLSK(1)TFHFNTVEEVHSR	4	-1.3231	1	0.974	1.003	0.921	0.993	1.081	1.012	1.065	0.154998
P30740	213	K	Leukocyte elastase inhibitor OS=Homo sapiens OX=9606 GN=SERPINB1 PE=1 SV=1	SERPINB1	1	0.00178132	64.64	FAYGYIEDLK(1)CR	3	-0.27522	1
P30740	79	K	Leukocyte elastase inhibitor OS=Homo sapiens OX=9606 GN=SERPINB1 PE=1 SV=1	SERPINB1	1	0.00169974	84.954	FQSLNADINK(1)R	2	0.23247	1
P30838	221	K	Aldehyde dehydrogenase, dimeric NADP-preferring OS=Homo sapiens OX=9606 GN=ALDH3A1 PE=1 SV=3	ALDH3A1	1	6.99736e-05	89.484	SPCYVDK(1)NCDLDVACR	2	-0.99734	2	1.099	1.193	1.141	0.887	0.911	0.924	0.793	0.00095699
P30838	277	K	Aldehyde dehydrogenase, dimeric NADP-preferring OS=Homo sapiens OX=9606 GN=ALDH3A1 PE=1 SV=3	ALDH3A1	1	0.000671673	121.9	EFYGEDAK(1)K	2	1.7714	1	0.906	0.955	0.892	1.097	1.013	1.075	1.157	0.0099574
P30876	644	K	DNA-directed RNA polymerase II subunit RPB2 OS=Homo sapiens OX=9606 GN=POLR2B PE=1 SV=1	POLR2B	1	0.0395789	43.308	HIDQLK(1)ER	3	0.89952	1
P31040	547	K	Succinate dehydrogenase [ubiquinone] flavoprotein subunit, mitochondrial OS=Homo sapiens OX=9606 GN=SDHA PE=1 SV=2	SDHA	1	0.00638692	65.224	LYGDLK(1)HLK	3	-0.80225	2	1.243	1.196	1.14	0.965	0.806	0.864	0.736	0.0060568
P31040	179	K	Succinate dehydrogenase [ubiquinone] flavoprotein subunit, mitochondrial OS=Homo sapiens OX=9606 GN=SDHA PE=1 SV=2	SDHA	1	2.47555e-05	115.57	AFGGQSLK(1)FGK	3	-1.7987	2	1.105	1.169	1.09	0.936	0.909	0.927	0.824	0.00111711
P31040	250	K	Succinate dehydrogenase [ubiquinone] flavoprotein subunit, mitochondrial OS=Homo sapiens OX=9606 GN=SDHA PE=1 SV=2	SDHA	1	4.99908e-10	121.48	AK(1)NTVVATGGYGR	2	-0.32717	1	0.651	0.652	0.705	1.211	1.212	1.26	1.834	3.6211e-05
P31040	550	K	Succinate dehydrogenase [ubiquinone] flavoprotein subunit, mitochondrial OS=Homo sapiens OX=9606 GN=SDHA PE=1 SV=2	SDHA	1	0.00617906	83.753	HLK(1)TFDR	3	0.83267	1	1.223	1.085	0.848	0.95	1.036	0.935	0.926	0.58298
P31150	269	K	Rab GDP dissociation inhibitor alpha OS=Homo sapiens OX=9606 GN=GDI1 PE=1 SV=2	GDI1	1	3.07802e-06	109.02	VVGVK(1)SEGEVAR	2	-1.5504	1	1.036	1.138	1.192	0.946	0.911	0.913	0.823	0.0108799
P31153	350	K	S-adenosylmethionine synthase isoform type-2 OS=Homo sapiens OX=9606 GN=MAT2A PE=1 SV=1	MAT2A	1	0.00261026	113.62	ELLEIVK(1)K	3	-0.76109	2	0.895	0.957	0.961	1.039	1.032	1.069	1.116	0.0122837
P31153	88	K	S-adenosylmethionine synthase isoform type-2 OS=Homo sapiens OX=9606 GN=MAT2A PE=1 SV=1	MAT2A	1	0.00021352	84.759	EAVK(1)HIGYDDSSK	3	-1.1497	1	0.963	0.956	1.044	1.06	0.957	1.027	1.027	0.5512
P31153	289	K	S-adenosylmethionine synthase isoform type-2 OS=Homo sapiens OX=9606 GN=MAT2A PE=1 SV=1	MAT2A	1	0.0336053	78.113	DYTK(1)VDR	2	-0.63557	1	0.94	0.944	0.914	1.084	1.06	1.013	1.128	0.0057407
P31153	234	K	S-adenosylmethionine synthase isoform type-2 OS=Homo sapiens OX=9606 GN=MAT2A PE=1 SV=1	MAT2A	1	2.48941e-30	148.75	AVVPAK(1)YLDEDTIYHLQPSGR	3	-1.0954	1	0.882	0.849	0.984	1.073	1.046	1.088	1.181	0.021121
P31153	351	K	S-adenosylmethionine synthase isoform type-2 OS=Homo sapiens OX=9606 GN=MAT2A PE=1 SV=1	MAT2A	1	0.0214334	44.89	K(1)NFDLRPGVIVR	3	-2.2829	1	1.057	0.996	1.055	0.941	1.019	0.982	0.947	0.142097
P31689	32	K	DnaJ homolog subfamily A member 1 OS=Homo sapiens OX=9606 GN=DNAJA1 PE=1 SV=2	DNAJA1	1	0.00641106	62.463	LALK(1)YHPDK	3	-0.81787	2	0.958	0.904	0.92	1.052	1.022	1.092	1.138	0.0073841
P31689	317	K	DnaJ homolog subfamily A member 1 OS=Homo sapiens OX=9606 GN=DNAJA1 PE=1 SV=2	DNAJA1	1	0.0259134	61.962	RPYEK(1)GR	3	-0.3678	1	0.942	0.903	0.964	0.982	1.114	1.048	1.119	0.053238
P31689	136	K	DnaJ homolog subfamily A member 1 OS=Homo sapiens OX=9606 GN=DNAJA1 PE=1 SV=2	DNAJA1	1	0.00210646	83.573	NVICDK(1)CEGR	2	0.43085	1	1.081	1.107	1.1	0.943	0.924	0.956	0.859	0.00023691
P31689	44	K	DnaJ homolog subfamily A member 1 OS=Homo sapiens OX=9606 GN=DNAJA1 PE=1 SV=2	DNAJA1	1	2.63687e-05	94.717	NPNEGEK(1)FK	2	-0.71295	2	0.854	0.866	0.857	1.03	1.164	1.103	1.279	0.020482
P31939	137	K	Bifunctional purine biosynthesis protein PURH OS=Homo sapiens OX=9606 GN=ATIC PE=1 SV=3	ATIC	1	1.91824e-08	147.34	AAAK(1)NHAR	2	-0.52752	2	0.994	1.144	1.026	0.995	0.909	1	0.918	0.182318
P31939	66	K	Bifunctional purine biosynthesis protein PURH OS=Homo sapiens OX=9606 GN=ATIC PE=1 SV=3	ATIC	1	0.000175877	71.98	VK(1)TLHPAVHAGILAR	4	0.46013	1	0.965	0.976	1.033	1.011	1.054	0.971	1.021	0.55264
P31942	76	K	Heterogeneous nuclear ribonucleoprotein H3 OS=Homo sapiens OX=9606 GN=HNRNPH3 PE=1 SV=2	HNRNPH3	1	1.05175e-05	119.39	EIAENALGK(1)HK	4	-0.36196	3	0.887	0.915	0.941	1.085	1.01	1.094	1.163	0.0079552
P31946	159	K	14-3-3 protein beta/alpha OS=Homo sapiens OX=9606 GN=YWHAB PE=1 SV=3	YWHAB	1	1.28864e-06	84.159	QTTVSNSQQAYQEAFEISK(1)K	3	0.41238	1	0.99	1.018	0.952	0.974	1.052	1.018	1.028	0.39982
P31946	11	K	14-3-3 protein beta/alpha OS=Homo sapiens OX=9606 GN=YWHAB PE=1 SV=3	YWHAB	1	0.00387073	103.55	SELVQK(1)AK	3	0.33836	2	0.896	0.92	1.07	0.997	1.071	1.021	1.07	0.29842
P31946	70	K	14-3-3 protein beta/alpha OS=Homo sapiens OX=9606 GN=YWHAB PE=1 SV=3	YWHAB	1	1.60397e-05	106.67	VISSIEQK(1)TER	3	-0.051644	2	0.777	0.814	0.701	1.201	1.131	1.165	1.526	0.0008628
P31946	117	K	14-3-3 protein beta/alpha OS=Homo sapiens OX=9606 GN=YWHAB PE=1 SV=3	YWHAB	1	2.50545e-06	101.53	YLIPNATQPESK(1)VFYLK	3	-0.039151	1	0.91	0.87	1.006	1.056	1.052	1.052	1.134	0.096785
P31946	122	K	14-3-3 protein beta/alpha OS=Homo sapiens OX=9606 GN=YWHAB PE=1 SV=3	YWHAB	1	0.00640559	105.39	VFYLK(1)MK	3	-1.34	3	1.116	1.015	1	1.001	0.97	0.964	0.937	0.154662
P31947	49	K	14-3-3 protein sigma OS=Homo sapiens OX=9606 GN=SFN PE=1 SV=1	SFN	1	0.000226617	77.372	NLLSVAYK(1)NVVGGQR	3	-0.070929	1	0.937	0.882	0.875	1.03	1.08	1.112	1.196	0.0045042
P31947	9	K	14-3-3 protein sigma OS=Homo sapiens OX=9606 GN=SFN PE=1 SV=1	SFN	1	0.00711757	91.867	ASLIQK(1)AK	2	0.42679	2	0.856	0.854	0.929	1.105	1.076	1.08	1.236	0.00182365
P31948	237	K	Stress-induced-phosphoprotein 1 OS=Homo sapiens OX=9606 GN=STIP1 PE=1 SV=1	STIP1	1	0.00140967	108.7	ELGNDAYK(1)K	2	-0.61799	3	0.999	0.981	0.97	1.058	0.996	1	1.035	0.182242
P31948	246	K	Stress-induced-phosphoprotein 1 OS=Homo sapiens OX=9606 GN=STIP1 PE=1 SV=1	STIP1	1	0.00471079	59.198	DFDTALK(1)HYDK	3	-0.96243	1	0.984	0.921	0.977	1.127	0.928	1.047	1.076	0.30596
P31948	373	K	Stress-induced-phosphoprotein 1 OS=Homo sapiens OX=9606 GN=STIP1 PE=1 SV=1	STIP1	1	0.00707341	48.216	GNECFQK(1)GDYPQAMK	3	0.52465	1	1.217	1.116	1.241	0.922	0.925	0.791	0.738	0.0075018
P31948	239	K	Stress-induced-phosphoprotein 1 OS=Homo sapiens OX=9606 GN=STIP1 PE=1 SV=1	STIP1	1	0.0273783	73.499	K(1)DFDTALK	2	-0.1408	1	0.963	0.918	0.935	1.099	1.019	1.027	1.117	0.0165644
P31948	68	K	Stress-induced-phosphoprotein 1 OS=Homo sapiens OX=9606 GN=STIP1 PE=1 SV=1	STIP1	1	0.000106181	102.4	TVDLK(1)PDWGK	2	1.4965	2	1.315	1.301	1.345	0.751	0.826	0.791	0.598	6.0367e-05
P31948	277	K	Stress-induced-phosphoprotein 1 OS=Homo sapiens OX=9606 GN=STIP1 PE=1 SV=1	STIP1	1	0.0118779	95.909	GDYNK(1)CR	2	-0.497	2	1.606	1.612	1.512	0.633	0.624	0.599	0.392	1.934e-06
P31948	317	K	Stress-induced-phosphoprotein 1 OS=Homo sapiens OX=9606 GN=STIP1 PE=1 SV=1	STIP1	1	0.0121099	53.237	YK(1)DAIHFYNK	3	0.0034782	2	1.007	1.016	0.952	0.991	0.977	1.065	1.019	0.60168
P31948	337	K	Stress-induced-phosphoprotein 1 OS=Homo sapiens OX=9606 GN=STIP1 PE=1 SV=1	STIP1	1	0.0271518	81.296	TPDVLK(1)K	2	0.84725	2	1.629	1.601	1.54	0.635	0.641	0.555	0.384	4.0739e-05
P31948	530	K	Stress-induced-phosphoprotein 1 OS=Homo sapiens OX=9606 GN=STIP1 PE=1 SV=1	STIP1	1	0.000193246	113.93	NPVIAQK(1)IQK	2	-0.080862	2	1.071	0.979	0.991	0.996	0.951	1.046	0.984	0.70726
P31948	366	K	Stress-induced-phosphoprotein 1 OS=Homo sapiens OX=9606 GN=STIP1 PE=1 SV=1	STIP1	1	0.000251961	128.81	NK(1)GNECFQK	3	-2.0264	2	1.893	1.814	1.67	0.502	0.462	0.461	0.265	4.3912e-06
P31948	73	K	Stress-induced-phosphoprotein 1 OS=Homo sapiens OX=9606 GN=STIP1 PE=1 SV=1	STIP1	0.999928	0.000350112	78.081	TVDLKPDWGK(1)GYSR	3	0.66477	1	0.923	0.916	0.943	1.109	1.017	1.042	1.139	0.008959
P31948	169	K	Stress-induced-phosphoprotein 1 OS=Homo sapiens OX=9606 GN=STIP1 PE=1 SV=1	STIP1	0.99982	0.000892419	63.185	NKPSDLGTK(1)LQDPR	3	-3.3261	1	0.667	0.685	0.75	1.286	1.154	1.185	1.725	0.00034403
P31948	100	K	Stress-induced-phosphoprotein 1 OS=Homo sapiens OX=9606 GN=STIP1 PE=1 SV=1	STIP1	1	2.13767e-06	102.65	TYEEGLK(1)HEANNPQLK	3	-0.059177	3	1.064	1.017	1.02	0.985	0.959	1.006	0.951	0.068175
P31948	325	K	Stress-induced-phosphoprotein 1 OS=Homo sapiens OX=9606 GN=STIP1 PE=1 SV=1	STIP1	1	0.0105559	44.807	DAIHFYNK(1)SLAEHR	3	0.066022	1	0.731	0.681	0.7	1.215	1.169	1.234	1.713	3.6441e-05
P31948	388	K	Stress-induced-phosphoprotein 1 OS=Homo sapiens OX=9606 GN=STIP1 PE=1 SV=1	STIP1	1	0.00459205	82.452	HYTEAIK(1)R	3	-0.44701	1	0.987	1.01	1.005	1.062	1.006	0.953	1.006	0.87476
P31948	364	K	Stress-induced-phosphoprotein 1 OS=Homo sapiens OX=9606 GN=STIP1 PE=1 SV=1	STIP1	1	3.99735e-06	101.3	LAYINPDLALEEK(1)NK	3	-0.66875	1	1.458	1.193	1.342	0.815	0.767	0.776	0.591	0.0010186
P31949	27	K	Protein S100-A11 OS=Homo sapiens OX=9606 GN=S100A11 PE=1 SV=2	S100A11	1	1.00552e-06	113.4	YAGK(1)DGYNYTLSK	3	-0.26465	3	0.815	0.809	0.802	1.23	1.104	1.076	1.406	0.0144999
P31949	103	K	Protein S100-A11 OS=Homo sapiens OX=9606 GN=S100A11 PE=1 SV=2	S100A11	1	0.000992444	120.62	AVPSQK(1)R	2	-0.30019	1	0.911	0.834	0.913	1.162	1.013	1.079	1.224	0.0152991
P32119	196	K	Peroxiredoxin-2 OS=Homo sapiens OX=9606 GN=PRDX2 PE=1 SV=5	PRDX2	1	0.0230598	84.244	EYFSK(1)HN	2	0.055874	2	0.77	0.843	0.976	1.091	1.129	1.068	1.27	0.026457
P32119	26	K	Peroxiredoxin-2 OS=Homo sapiens OX=9606 GN=PRDX2 PE=1 SV=5	PRDX2	1	0.00163326	58.32	ATAVVDGAFK(1)EVK	3	0.32538	1
P32119	135	K	Peroxiredoxin-2 OS=Homo sapiens OX=9606 GN=PRDX2 PE=1 SV=5	PRDX2	1	0.000156009	98.407	GLFIIDGK(1)GVLR	3	-1.3914	2	0.85	0.881	0.914	1.037	1.092	1.122	1.229	0.0027178
P32320	11	K	Cytidine deaminase OS=Homo sapiens OX=9606 GN=CDA PE=1 SV=2	CDA	1	0.00181243	49.66	RPACTLK(1)PECVQQLLVCSQEAK	4	-0.77634	1	1.07	0.964	0.994	0.982	0.969	1.05	0.991	0.83882
P32322	283	K	Pyrroline-5-carboxylate reductase 1, mitochondrial OS=Homo sapiens OX=9606 GN=PYCR1 PE=1 SV=2	PYCR1	1	3.71094e-05	67.645	ELQSMADQEQVSPAAIK(1)K	3	0.67401	1	0.954	0.964	1.016	1.079	0.999	0.987	1.045	0.2725
P32929	139	K	Cystathionine gamma-lyase OS=Homo sapiens OX=9606 GN=CTH PE=1 SV=3	CTH	1	0.000848405	90.614	ISFVDCSK(1)IK	3	0.71042	2	1.148	1.183	1.158	0.797	0.804	1.075	0.767	0.108218
P32969	174	K	60S ribosomal protein L9 OS=Homo sapiens OX=9606 GN=RPL9 PE=1 SV=1	RPL9	1	0.00519842	71.513	K(1)FLDGIYVSEK	2	0.99709	2	0.811	1.072	0.87	1.098	1.087	0.999	1.157	0.163416
P33176	67	K	Kinesin-1 heavy chain OS=Homo sapiens OX=9606 GN=KIF5B PE=1 SV=1	KIF5B	1	5.88998e-14	122.01	VFQSSTSQEQVYNDCAK(1)K	3	-0.38476	1	1.238	1.369	1.564	0.765	0.715	0.742	0.533	0.00088467
P33176	602	K	Kinesin-1 heavy chain OS=Homo sapiens OX=9606 GN=KIF5B PE=1 SV=1	KIF5B	1	0.0120205	83.862	SEVK(1)TMVK	2	-1.2189	1	1.018	1.05	1.085	1.013	0.989	0.914	0.925	0.094603
P33240	189	K	Cleavage stimulation factor subunit 2 OS=Homo sapiens OX=9606 GN=CSTF2 PE=1 SV=1	CSTF2	1	3.9125e-05	98.105	IVDPEIALK(1)ILHR	3	0.0032245	1	0.924	1.13	1.185	0.867	1.107	0.873	0.879	0.30584
P33991	409	K	DNA replication licensing factor MCM4 OS=Homo sapiens OX=9606 GN=MCM4 PE=1 SV=5	MCM4	1	0.00142638	102.4	VSNVK(1)SVYK	2	-0.95676	1	1.022	0.955	0.994	1.051	1.043	0.948	1.024	0.5845
P33991	490	K	DNA replication licensing factor MCM4 OS=Homo sapiens OX=9606 GN=MCM4 PE=1 SV=5	MCM4	1	0.00354296	87.258	K(1)DFSHTGR	3	-0.16325	1	1.047	1.015	1.022	1.04	0.874	1.05	0.961	0.54946
P33992	350	K	DNA replication licensing factor MCM5 OS=Homo sapiens OX=9606 GN=MCM5 PE=1 SV=5	MCM5	1	6.70466e-08	116.51	SIAPSIFGGTDMK(1)K	3	0.34502	1	1.062	1.067	0.953	0.986	1.132	0.85	0.963	0.65856
P33992	392	K	DNA replication licensing factor MCM5 OS=Homo sapiens OX=9606 GN=MCM5 PE=1 SV=5	MCM5	1	0.00336743	73.499	SQLLK(1)FVEK	3	-0.61924	2	1.063	1.329	1.138	0.899	0.93	0.828	0.753	0.01964
P33992	387	K	DNA replication licensing factor MCM5 OS=Homo sapiens OX=9606 GN=MCM5 PE=1 SV=5	MCM5	1	1.41288e-06	81.016	GDINLLMLGDPGTAK(1)SQLLK	3	-0.36458	1	1.045	1.107	0.93	1.004	0.923	1.037	0.962	0.57598
P33992	141	K	DNA replication licensing factor MCM5 OS=Homo sapiens OX=9606 GN=MCM5 PE=1 SV=5	MCM5	1	0.00131876	66.989	SLK(1)SDMMSHLVK	3	-0.6542	1	0.85	0.826	0.871	1.087	1.057	1.175	1.303	0.00168372
P33993	231	K	DNA replication licensing factor MCM7 OS=Homo sapiens OX=9606 GN=MCM7 PE=1 SV=4	MCM7	1	0.0029114	109.66	FIK(1)FQEMK	2	-1.4032	1	1.096	1.045	0.977	0.973	1.008	0.961	0.944	0.190002
P33993	28	K	DNA replication licensing factor MCM7 OS=Homo sapiens OX=9606 GN=MCM7 PE=1 SV=4	MCM7	1	2.24374e-05	97.797	FLQEFYQDDELGK(1)K	3	-0.45588	1	0.991	0.934	1.045	1.034	1.093	0.914	1.024	0.74166
P34896	386	K	Serine hydroxymethyltransferase, cytosolic OS=Homo sapiens OX=9606 GN=SHMT1 PE=1 SV=1	SHMT1	1	1.82768e-34	159.81	VLEACSIACNK(1)NTCPGDR	3	0.20345	1	1.146	1.146	1.1	0.951	0.828	0.976	0.812	0.0163803
P34897	269	K	Serine hydroxymethyltransferase, mitochondrial OS=Homo sapiens OX=9606 GN=SHMT2 PE=1 SV=3	SHMT2	1	1.32827e-09	109.72	VIPSPFK(1)HADIVTTTTHK	4	-1.2217	1	0.808	0.826	0.747	1.209	1.183	1.049	1.445	0.0023826
P34897	356	K	Serine hydroxymethyltransferase, mitochondrial OS=Homo sapiens OX=9606 GN=SHMT2 PE=1 SV=3	SHMT2	1	0.000118236	101.71	EYSLQVLK(1)NAR	2	-0.19379	2	0.949	0.982	0.892	0.913	0.951	1.259	1.106	0.43308
P34897	200	K	Serine hydroxymethyltransferase, mitochondrial OS=Homo sapiens OX=9606 GN=SHMT2 PE=1 SV=3	SHMT2	1	1.11032e-09	113.54	LNPK(1)TGLIDYNQLALTAR	3	-0.53359	1	0.671	0.753	0.836	1.158	1.146	1.206	1.553	0.0024569
P34897	103	K	Serine hydroxymethyltransferase, mitochondrial OS=Homo sapiens OX=9606 GN=SHMT2 PE=1 SV=3	SHMT2	1	0.00773999	78.556	YSEGYPGK(1)R	2	0.1837	2	0.844	0.833	0.822	1.15	1.052	1.155	1.343	0.00072
P34897	302	K	Serine hydroxymethyltransferase, mitochondrial OS=Homo sapiens OX=9606 GN=SHMT2 PE=1 SV=3	SHMT2	1	0.0286974	72.042	AVDPK(1)TGR	2	-0.32398	1	1.311	1.294	1.179	0.866	0.823	0.807	0.66	0.00046058
P34897	95	K	Serine hydroxymethyltransferase, mitochondrial OS=Homo sapiens OX=9606 GN=SHMT2 PE=1 SV=3	SHMT2	1	7.16981e-08	68.952	AALEALGSCLNNK(1)YSEGYPGK	4	-0.17392	1	1.351	1.338	1.439	0.709	0.741	0.804	0.546	0.000155825
P34897	409	K	Serine hydroxymethyltransferase, mitochondrial OS=Homo sapiens OX=9606 GN=SHMT2 PE=1 SV=3	SHMT2	1	5.23558e-10	116.96	VLELVSITANK(1)NTCPGDR	3	-1.7464	1	1.244	1.174	0.966	0.956	0.872	0.937	0.817	0.072781
P34897	469	K	Serine hydroxymethyltransferase, mitochondrial OS=Homo sapiens OX=9606 GN=SHMT2 PE=1 SV=3	SHMT2	1	3.8949e-07	138.45	LQDFK(1)SFLLK	2	0.30332	1	1.193	1.212	1.203	0.918	0.884	0.81	0.724	0.0129993
P34932	697	K	Heat shock 70 kDa protein 4 OS=Homo sapiens OX=9606 GN=HSPA4 PE=1 SV=4	HSPA4	1	0.000504278	58.712	FQESEERPK(1)LFEELGK	3	2.2462	1	0.925	0.894	0.91	1.035	1.119	1.045	1.172	0.0039191
P34932	272	K	Heat shock 70 kDa protein 4 OS=Homo sapiens OX=9606 GN=HSPA4 PE=1 SV=4	HSPA4	1	0.0101784	57.785	LSQECEK(1)LK	3	-1.3694	1	0.996	1.084	1.203	0.881	0.94	0.996	0.858	0.080697
P34932	53	K	Heat shock 70 kDa protein 4 OS=Homo sapiens OX=9606 GN=HSPA4 PE=1 SV=4	HSPA4	1	1.46132e-11	127.83	SIGAAAK(1)SQVISNAK	2	-0.43078	2	0.929	0.996	0.963	1.049	1.031	1.012	1.071	0.038776
P34932	194	K	Heat shock 70 kDa protein 4 OS=Homo sapiens OX=9606 GN=HSPA4 PE=1 SV=4	HSPA4	1	0.000138049	99.991	QDLPALEEK(1)PR	2	-0.70374	1	1.007	1.215	1.232	0.898	0.939	0.868	0.783	0.025002
P34932	61	K	Heat shock 70 kDa protein 4 OS=Homo sapiens OX=9606 GN=HSPA4 PE=1 SV=4	HSPA4	1	3.07278e-06	102.65	SQVISNAK(1)NTVQGFK	3	-0.67097	1	1.038	0.945	0.976	0.994	1.013	1.04	1.03	0.38248
P34932	305	K	Heat shock 70 kDa protein 4 OS=Homo sapiens OX=9606 GN=HSPA4 PE=1 SV=4	HSPA4	1	0.00433007	62.861	GK(1)FLEMCNDLLAR	2	1.4142	1	0.983	0.996	1.112	0.95	0.992	1.008	0.954	0.34926
P34932	135	K	Heat shock 70 kDa protein 4 OS=Homo sapiens OX=9606 GN=HSPA4 PE=1 SV=4	HSPA4	1	2.22974e-05	65.887	K(1)PVVDCVVSVPCFYTDAER	3	-1.0074	1	1.047	1.177	1.198	0.861	0.967	0.897	0.796	0.0138368
P34932	717	K	Heat shock 70 kDa protein 4 OS=Homo sapiens OX=9606 GN=HSPA4 PE=1 SV=4	HSPA4	1	0.00833086	89.886	IISSFK(1)NK	2	-0.39197	1	0.916	0.92	0.936	1.041	1.083	1.046	1.144	0.00068163
P34932	785	K	Heat shock 70 kDa protein 4 OS=Homo sapiens OX=9606 GN=HSPA4 PE=1 SV=4	HSPA4	1	0.000662467	64.104	ELTSTCSPIISK(1)PK	3	-3.0717	1	0.958	0.977	0.863	1.137	1.029	0.995	1.13	0.093422
P34932	477	K	Heat shock 70 kDa protein 4 OS=Homo sapiens OX=9606 GN=HSPA4 PE=1 SV=4	HSPA4	1	5.33522e-10	120.7	VTPQSDGSSSK(1)VK	2	-0.34209	2	0.845	0.831	0.865	1.071	1.178	1.076	1.309	0.00126201
P34932	329	K	Heat shock 70 kDa protein 4 OS=Homo sapiens OX=9606 GN=HSPA4 PE=1 SV=4	HSPA4	1	2.32305e-05	138.25	SVLEQTK(1)LK	3	2.1166	2	1.008	0.989	1.141	0.943	1.004	0.974	0.931	0.2214
P34932	44	K	Heat shock 70 kDa protein 4 OS=Homo sapiens OX=9606 GN=HSPA4 PE=1 SV=4	HSPA4	1	1.44443e-06	110.51	CTPACISFGPK(1)NR	2	-0.85084	1	1.432	1.475	1.477	0.692	0.682	0.711	0.476	6.1646e-07
P35080	91	K	Profilin-2 OS=Homo sapiens OX=9606 GN=PFN2 PE=1 SV=3	PFN2	1	2.21305e-17	141.13	TK(1)SQGGEPTYNVAVGR	2	-0.6162	4	1.368	1.303	1.383	0.736	0.762	0.809	0.569	6.4911e-05
P35221	881	K	Catenin alpha-1 OS=Homo sapiens OX=9606 GN=CTNNA1 PE=1 SV=1	CTNNA1	1	0.00164808	73.927	EKQDETQTK(1)IK	3	0.98541	1	0.774	0.811	0.723	1.193	1.172	1.122	1.511	0.00040268
P35221	737	K	Catenin alpha-1 OS=Homo sapiens OX=9606 GN=CTNNA1 PE=1 SV=1	CTNNA1	1	1.73402e-10	121.82	GPLK(1)NTSDVISAAK	2	-0.34901	1	0.869	0.922	1.059	0.963	1.144	1.005	1.092	0.32
P35221	120	K	Catenin alpha-1 OS=Homo sapiens OX=9606 GN=CTNNA1 PE=1 SV=1	CTNNA1	1	5.50199e-08	107.82	AAAGEFADDPCSSVK(1)R	2	-0.12176	1	1.365	1.42	1.547	0.7	0.659	0.755	0.488	0.000182432
P35221	842	K	Catenin alpha-1 OS=Homo sapiens OX=9606 GN=CTNNA1 PE=1 SV=1	CTNNA1	1	4.739e-06	125.54	ASYVASTK(1)YQK	2	-0.47126	1	0.907	1.005	0.984	1.113	0.994	0.984	1.067	0.26926
P35221	889	K	Catenin alpha-1 OS=Homo sapiens OX=9606 GN=CTNNA1 PE=1 SV=1	CTNNA1	1	4.45262e-07	111.79	K(1)HVNPVQALSEFK	3	1.8577	1	0.837	0.832	0.879	1.072	1.144	1.103	1.303	0.00049939
P35232	208	K	Prohibitin OS=Homo sapiens OX=9606 GN=PHB PE=1 SV=1	PHB	1	0.00465515	56.295	K(1)AAIISAEGDSK	3	-0.58068	1	0.745	0.793	0.851	1.063	1.264	1.095	1.432	0.0055598
P35232	202	K	Prohibitin OS=Homo sapiens OX=9606 GN=PHB PE=1 SV=1	PHB	1	8.49153e-05	104.22	FVVEK(1)AEQQK	3	1.0761	1	0.727	0.772	0.707	1.186	1.162	1.203	1.61	6.4106e-05
P35237	132	K	Serpin B6 OS=Homo sapiens OX=9606 GN=SERPINB6 PE=1 SV=3	SERPINB6	1	0.00972352	59.418	K(1)HINTWVAEK	3	-0.41741	1	0.929	0.939	0.909	0.991	1.068	1.103	1.139	0.0176566
P35241	237	K	Radixin OS=Homo sapiens OX=9606 GN=RDX PE=1 SV=1	RDX	1	5.44485e-05	103.88	LTPK(1)IGFPWSEIR	2	-1.3658	2	0.865	0.95	0.87	1.026	1.119	1.08	1.201	0.0096197
P35241	296	K	Radixin OS=Homo sapiens OX=9606 GN=RDX PE=1 SV=1	RDX	1	0.000682476	78.324	RK(1)PDTIEVQQMK	3	-0.22481	2	1.024	1.031	1.037	0.983	1.015	0.96	0.957	0.054538
P35241	544	K	Radixin OS=Homo sapiens OX=9606 GN=RDX PE=1 SV=1	RDX	1	0.000381197	80.853	K(1)TQNDVLHAENVK	3	-0.16159	1	1.015	1.033	1.127	0.969	1.039	0.893	0.914	0.169444
P35241	400	K	Radixin OS=Homo sapiens OX=9606 GN=RDX PE=1 SV=1	RDX	1	2.85776e-06	128.54	AAEEAK(1)SAIAK	2	-0.36358	1	0.806	0.788	0.754	1.164	1.154	1.142	1.474	4.2259e-05
P35241	316	K	Radixin OS=Homo sapiens OX=9606 GN=RDX PE=1 SV=1	RDX	1	0.00652908	82.452	HQK(1)QLER	3	0.94292	1	0.982	0.763	0.86	1.179	1.148	0.97	1.266	0.067138
P35241	79	K	Radixin OS=Homo sapiens OX=9606 GN=RDX PE=1 SV=1	RDX	1	8.98662e-06	125.97	KENPLQFK(1)FR	3	0.17714	2	0.848	0.827	0.868	1.123	1.084	1.12	1.308	0.000118675
P35249	13	K	Replication factor C subunit 4 OS=Homo sapiens OX=9606 GN=RFC4 PE=1 SV=2	RFC4	1	0.0114803	45.28	GTSISTK(1)PPLTK	3	-0.058526	1
P35268	84	K	60S ribosomal protein L22 OS=Homo sapiens OX=9606 GN=RPL22 PE=1 SV=2	RPL22	1	0.0385225	76.064	YLK(1)YLTK	2	-0.077775	1	0.839	0.783	0.813	1.162	1.154	1.086	1.397	0.00033895
P35268	69	K	60S ribosomal protein L22 OS=Homo sapiens OX=9606 GN=RPL22 PE=1 SV=2	RPL22	1	0.000186687	95.822	SK(1)ITVTSEVPFSK	2	-0.61069	1	0.9	0.949	1.038	1.005	1.016	1.067	1.07	0.2057
P35268	10	K	60S ribosomal protein L22 OS=Homo sapiens OX=9606 GN=RPL22 PE=1 SV=2	RPL22	1	0.0255853	81.784	LVVK(1)GGK	2	-0.18313	1	1.015	0.979	0.953	0.984	1.05	1.018	1.036	0.25216
P35268	80	K	60S ribosomal protein L22 OS=Homo sapiens OX=9606 GN=RPL22 PE=1 SV=2	RPL22	1	3.48819e-05	101.71	ITVTSEVPFSK(1)R	2	-0.75166	2	0.805	0.81	0.919	1.048	1.174	1.105	1.313	0.0072957
P35579	910	K	Myosin-9 OS=Homo sapiens OX=9606 GN=MYH9 PE=1 SV=4	MYH9	1	7.11594e-11	120.13	K(1)QELEEICHDLEAR	3	-0.10569	1	1.179	1.133	1.191	0.868	0.89	0.919	0.764	0.00027973
P35579	1173	K	Myosin-9 OS=Homo sapiens OX=9606 GN=MYH9 PE=1 SV=4	MYH9	1	0.0131812	73.666	EQEVNILK(1)K	3	-0.90598	2	0.933	0.965	0.936	1.024	1.075	1.03	1.104	0.0061443
P35579	565	K	Myosin-9 OS=Homo sapiens OX=9606 GN=MYH9 PE=1 SV=4	MYH9	1	0.00243053	54.898	DK(1)ADFCIIHYAGK	3	-0.65742	1	1.575	1.478	1.63	0.589	0.674	0.622	0.403	4.3735e-05
P35579	79	K	Myosin-9 OS=Homo sapiens OX=9606 GN=MYH9 PE=1 SV=4	MYH9	1	0.0173824	56.916	MNPPK(1)FSK	3	-1.9563	1	0.89	0.792	0.936	1.07	1.138	1.067	1.251	0.0136759
P35579	1295	K	Myosin-9 OS=Homo sapiens OX=9606 GN=MYH9 PE=1 SV=4	MYH9	1	0.00118875	49.125	LQVELDNVTGLLSQSDSK(1)SSK	3	-1.1489	1	1.102	1.076	0.937	0.899	1.064	0.976	0.943	0.45482
P35579	180	K	Myosin-9 OS=Homo sapiens OX=9606 GN=MYH9 PE=1 SV=4	MYH9	1	5.30441e-22	143.04	EDQSILCTGESGAGK(1)TENTK	3	-0.56027	1	1.567	1.76	1.57	0.594	0.577	0.566	0.355	1.72257e-05
P35579	1193	K	Myosin-9 OS=Homo sapiens OX=9606 GN=MYH9 PE=1 SV=4	MYH9	1	2.02518e-20	142.84	QK(1)HSQAVEELAEQLEQTK	3	0.76506	2	1.079	0.984	0.959	1.005	0.999	1.002	0.995	0.92094
P35579	1441	K	Myosin-9 OS=Homo sapiens OX=9606 GN=MYH9 PE=1 SV=4	MYH9	1	0.00149399	105.2	QSACNLEK(1)K	3	-0.50686	3	1.265	1.327	1.28	0.809	0.807	0.813	0.627	0.00097699
P35579	1249	K	Myosin-9 OS=Homo sapiens OX=9606 GN=MYH9 PE=1 SV=4	MYH9	1	0.000131164	100.11	K(1)VEAQLQELQVK	2	-1.4272	1	0.791	0.811	0.926	1.121	1.07	1.141	1.318	0.0060992
P35579	1724	K	Myosin-9 OS=Homo sapiens OX=9606 GN=MYH9 PE=1 SV=4	MYH9	1	0.00398048	90.906	GALALEEK(1)R	2	0.52531	1
P35579	1775	K	Myosin-9 OS=Homo sapiens OX=9606 GN=MYH9 PE=1 SV=4	MYH9	1	8.6294e-06	124.67	SHAQK(1)NENAR	2	0.85184	2	0.772	0.88	0.704	1.121	1.165	1.162	1.463	0.0042847
P35579	228	K	Myosin-9 OS=Homo sapiens OX=9606 GN=MYH9 PE=1 SV=4	MYH9	1	3.79231e-05	133.42	TVK(1)NDNSSR	2	0.16571	1	0.982	0.94	0.847	1.05	1.061	1.065	1.147	0.0875
P35579	1445	K	Myosin-9 OS=Homo sapiens OX=9606 GN=MYH9 PE=1 SV=4	MYH9	1	0.00247222	82.069	K(1)FDQLLAEEK	2	-2.2843	2	0.723	0.888	0.847	1.137	1.172	1.07	1.375	0.008983
P35579	1802	K	Myosin-9 OS=Homo sapiens OX=9606 GN=MYH9 PE=1 SV=4	MYH9	1	0.0028764	65.179	LQEMEGTVK(1)SK	3	0.1553	1
P35579	540	K	Myosin-9 OS=Homo sapiens OX=9606 GN=MYH9 PE=1 SV=4	MYH9	1	0.00563144	80.245	ATDK(1)SFVEK	2	-0.047939	1	1.058	1.056	1.125	0.972	0.924	0.96	0.882	0.0081978
P35579	555	K	Myosin-9 OS=Homo sapiens OX=9606 GN=MYH9 PE=1 SV=4	MYH9	1	0.000267071	80.632	VMQEQGTHPK(1)FQK	3	-2.2983	2	1.138	1.081	1.039	0.968	0.941	0.94	0.874	0.0088969
P35579	651	K	Myosin-9 OS=Homo sapiens OX=9606 GN=MYH9 PE=1 SV=4	MYH9	1	0.000220944	94.717	TVGQLYK(1)EQLAK	2	0.8147	2	1.009	1.04	0.975	0.944	1.063	0.991	0.991	0.82072
P35579	299	K	Myosin-9 OS=Homo sapiens OX=9606 GN=MYH9 PE=1 SV=4	MYH9	1	0.000689198	89.663	TDLLLEPYNK(1)YR	2	0.88336	1	1.032	1.096	1.04	0.977	0.91	1.015	0.916	0.07618
P35579	38	K	Myosin-9 OS=Homo sapiens OX=9606 GN=MYH9 PE=1 SV=4	MYH9	1	4.77596e-05	89.311	LVWVPSDK(1)SGFEPASLK	3	0.25106	1
P35579	678	K	Myosin-9 OS=Homo sapiens OX=9606 GN=MYH9 PE=1 SV=4	MYH9	1	0.00965679	63.816	CIIPNHEK(1)K	3	-1.4963	1	1.114	1.135	1.223	0.863	0.886	0.946	0.776	0.0030374
P35579	1459	K	Myosin-9 OS=Homo sapiens OX=9606 GN=MYH9 PE=1 SV=4	MYH9	1	0.00199988	84.169	TISAK(1)YAEER	2	0.23699	1	0.731	0.813	0.873	1.169	1.128	1.114	1.411	0.0029243
P35579	1918	K	Myosin-9 OS=Homo sapiens OX=9606 GN=MYH9 PE=1 SV=4	MYH9	1	0.00125025	99.815	EVSSLK(1)NK	3	2.3345	2	0.902	0.942	0.956	1.07	1.089	0.994	1.126	0.022997
P35580	1106	K	Myosin-10 OS=Homo sapiens OX=9606 GN=MYH10 PE=1 SV=3	MYH10	1	4.18887e-05	97.463	GDDETLHK(1)NNALK	3	-2.6759	1	0.929	1.034	0.991	1.055	0.878	1.114	1.031	0.74914
P35580	1782	K	Myosin-10 OS=Homo sapiens OX=9606 GN=MYH10 PE=1 SV=3	MYH10	1	0.000848405	90.614	SAAQK(1)SDNAR	2	-0.18483	1	0.811	0.675	0.713	1.145	1.249	1.164	1.618	0.00133836
P35606	69	K	Coatomer subunit beta' OS=Homo sapiens OX=9606 GN=COPB2 PE=1 SV=2	COPB2	1	0.000620767	67.136	K(1)NWVVTGADDMQIR	3	0.32069	1	1.009	0.954	1.077	0.938	1.025	1.024	0.983	0.72578
P35606	130	K	Coatomer subunit beta' OS=Homo sapiens OX=9606 GN=COPB2 PE=1 SV=2	COPB2	1	0.018173	89.698	LWDWDK(1)K	2	0.44264	1	1.244	1.279	1.279	0.865	0.804	0.809	0.652	6.4909e-05
P35606	413	K	Coatomer subunit beta' OS=Homo sapiens OX=9606 GN=COPB2 PE=1 SV=2	COPB2	1	0.000318693	108.56	ESNSIVK(1)IFK	3	-0.18594	2	1.165	1.182	1.175	0.881	0.919	0.866	0.757	0.000102353
P35658	1892	K	Nuclear pore complex protein Nup214 OS=Homo sapiens OX=9606 GN=NUP214 PE=1 SV=2	NUP214	1	5.10113e-07	92.264	GGGFFSGLGGK(1)PSQDAANK	3	0.53519	1	0.99	1.004	0.963	0.997	1.059	0.993	1.031	0.27718
P35659	367	K	Protein DEK OS=Homo sapiens OX=9606 GN=DEK PE=1 SV=1	DEK	0.999188	0.00624303	53.237	K(0.001)DFIK(0.999)TTVK	3	-1.4463	1
P35659	349	K	Protein DEK OS=Homo sapiens OX=9606 GN=DEK PE=1 SV=1	DEK	1	1.13705e-22	159.18	K(1)VYENYPTYDLTER	2	3.2274	3	1.557	1.532	1.415	0.677	0.719	0.615	0.446	0.000119317
P35659	278	K	Protein DEK OS=Homo sapiens OX=9606 GN=DEK PE=1 SV=1	DEK	1	0.0431707	65.278	SVK(1)SANVK	2	1.7732	1
P35659	318	K	Protein DEK OS=Homo sapiens OX=9606 GN=DEK PE=1 SV=1	DEK	1	0.0133665	73.499	K(1)PPTDEELK	2	-0.105	1	0.861	0.957	1.008	0.972	1.193	0.965	1.108	0.30024
P35659	125	K	Protein DEK OS=Homo sapiens OX=9606 GN=DEK PE=1 SV=1	DEK	1	0.000706222	69.345	K(1)NVGQFSGFPFEK	3	-0.017626	1	0.843	0.752	0.845	1.083	1.157	1.154	1.391	0.00169526
P35659	100	K	Protein DEK OS=Homo sapiens OX=9606 GN=DEK PE=1 SV=1	DEK	1	0.0400315	49.097	IHFFLSK(1)K	3	0.15322	1	0.986	0.936	0.873	1.07	0.983	1.106	1.13	0.069639
P35869	244	K	Aryl hydrocarbon receptor OS=Homo sapiens OX=9606 GN=AHR PE=1 SV=2	AHR	1	0.0426312	41.448	LK(1)YLHGQK	3	-0.61453	1
P35869	303	K	Aryl hydrocarbon receptor OS=Homo sapiens OX=9606 GN=AHR PE=1 SV=2	AHR	1	0.00269	66.784	LDFTPIGCDAK(1)GR	2	-1.3115	1	1.27	1.537	1.393	0.706	0.763	0.733	0.524	0.00041743
P35869	80	K	Aryl hydrocarbon receptor OS=Homo sapiens OX=9606 GN=AHR PE=1 SV=2	AHR	1	0.000309723	102.87	AK(1)SFFDVALK	2	-0.86503	1	1.356	1.285	1.27	0.801	0.844	0.764	0.616	0.00015975
P35914	137	K	Hydroxymethylglutaryl-CoA lyase, mitochondrial OS=Homo sapiens OX=9606 GN=HMGCL PE=1 SV=2	HMGCL	1	1.48048e-28	176.83	K(1)NINCSIEESFQR	3	0.46393	3	1.382	1.441	1.469	0.652	0.7	0.787	0.498	0.00026353
P35914	48	K	Hydroxymethylglutaryl-CoA lyase, mitochondrial OS=Homo sapiens OX=9606 GN=HMGCL PE=1 SV=2	HMGCL	1	8.45526e-28	168.69	DGLQNEK(1)NIVSTPVK	2	-0.42963	3	1.44	1.397	1.407	0.751	0.717	0.715	0.514	1.7386e-06
P35998	415	K	26S proteasome regulatory subunit 7 OS=Homo sapiens OX=9606 GN=PSMC2 PE=1 SV=3	PSMC2	1	0.00219986	67.385	DFLEAVNK(1)VIK	3	-0.78379	1	1.096	0.995	0.988	1.061	0.963	0.949	0.966	0.50824
P35998	100	K	26S proteasome regulatory subunit 7 OS=Homo sapiens OX=9606 GN=PSMC2 PE=1 SV=3	PSMC2	1	0.00148137	59.705	CTK(1)IINADSEDPK	3	-0.53932	1	1.263	1.236	1.232	0.83	0.852	0.843	0.677	1.8048e-06
P36507	88	K	Dual specificity mitogen-activated protein kinase kinase 2 OS=Homo sapiens OX=9606 GN=MAP2K2 PE=1 SV=1	MAP2K2	1	0.000392159	96.183	ISELGAGNGGVVTK(1)VQHR	3	0.96991	1	1.122	0.964	0.948	0.978	1.009	1.012	0.988	0.87998
P36507	108	K	Dual specificity mitogen-activated protein kinase kinase 2 OS=Homo sapiens OX=9606 GN=MAP2K2 PE=1 SV=1	MAP2K2	1	4.9811e-05	95.483	LIHLEIK(1)PAIR	3	-0.84799	1	0.79	0.663	0.705	1.236	1.078	1.275	1.663	0.0022007
P36507	187	K	Dual specificity mitogen-activated protein kinase kinase 2 OS=Homo sapiens OX=9606 GN=MAP2K2 PE=1 SV=1	MAP2K2	1	0.0126679	63.419	EK(1)HQIMHR	3	0.27532	1	1.06	1.183	1.169	0.77	1.058	0.902	0.8	0.078803
P36542	90	K	ATP synthase subunit gamma, mitochondrial OS=Homo sapiens OX=9606 GN=ATP5F1C PE=1 SV=1	ATP5F1C	1	0.00698952	57.792	K(1)HLLIGVSSDR	3	0.060222	1	0.836	0.898	1.132	1.025	1.185	0.897	1.084	0.5338
P36542	115	K	ATP synthase subunit gamma, mitochondrial OS=Homo sapiens OX=9606 GN=ATP5F1C PE=1 SV=1	ATP5F1C	1	0.000350239	71.279	QMK(1)SEVATLTAAGK	3	-0.6972	1
P36542	55	K	ATP synthase subunit gamma, mitochondrial OS=Homo sapiens OX=9606 GN=ATP5F1C PE=1 SV=1	ATP5F1C	1	0.0127635	73.573	MVAAAK(1)YAR	2	-1.3521	1	0.946	0.901	0.856	1.057	1.086	1.076	1.191	0.0042239
P36543	138	K	V-type proton ATPase subunit E 1 OS=Homo sapiens OX=9606 GN=ATP6V1E1 PE=1 SV=1	ATP6V1E1	1	0.01156	85.355	K(1)QDFPLVK	3	0.41354	2	1.333	1.367	1.353	0.748	0.806	0.753	0.569	2.1349e-05
P36578	120	K	60S ribosomal protein L4 OS=Homo sapiens OX=9606 GN=RPL4 PE=1 SV=5	RPL4	1	0.000922154	121.53	VNTTQK(1)R	2	-0.77193	1	1.156	1.094	1.138	0.913	0.851	0.991	0.813	0.0113396
P36578	181	K	60S ribosomal protein L4 OS=Homo sapiens OX=9606 GN=RPL4 PE=1 SV=5	RPL4	1	0.0385605	76.679	AWNDIK(1)K	2	0.94707	1	0.962	1.027	1.044	1.015	1.029	0.952	0.988	0.74186
P36578	165	K	60S ribosomal protein L4 OS=Homo sapiens OX=9606 GN=RPL4 PE=1 SV=5	RPL4	1	0.001401	94.465	TK(1)EAVLLLK	2	0.024889	1	0.963	0.906	0.959	1.061	1.057	1.017	1.109	0.0124173
P36578	20	K	60S ribosomal protein L4 OS=Homo sapiens OX=9606 GN=RPL4 PE=1 SV=5	RPL4	1	7.83742e-05	89.911	GESSGK(1)NVTLPAVFK	3	0.3934	1	0.912	1.056	0.988	1.045	0.95	1.049	1.03	0.60298
P36578	172	K	60S ribosomal protein L4 OS=Homo sapiens OX=9606 GN=RPL4 PE=1 SV=5	RPL4	1	0.00325211	107.57	EAVLLLK(1)K	2	0.21211	1	0.957	0.953	1.017	1.011	1.036	1.019	1.047	0.102796
P36578	353	K	60S ribosomal protein L4 OS=Homo sapiens OX=9606 GN=RPL4 PE=1 SV=5	RPL4	1	0.000246469	81.632	VDK(1)AAAAAAALQAK	3	-0.79043	1	0.763	0.797	1.02	1.146	1.141	1.014	1.279	0.062559
P36578	320	K	60S ribosomal protein L4 OS=Homo sapiens OX=9606 GN=RPL4 PE=1 SV=5	RPL4	0.999784	0.0342316	50.04	KNPLK(1)NLR	3	0.42089	1	0.857	0.838	0.873	1.102	1.043	1.162	1.288	0.00164171
P36578	364	K	60S ribosomal protein L4 OS=Homo sapiens OX=9606 GN=RPL4 PE=1 SV=5	RPL4	1	5.05606e-06	105.19	AAAAAAALQAK(1)SDEK	3	0.81374	2	0.849	0.869	0.842	1.137	1.137	1.042	1.295	0.00108044
P36776	367	K	Lon protease homolog, mitochondrial OS=Homo sapiens OX=9606 GN=LONP1 PE=1 SV=2	LONP1	1	0.0134532	94.114	ALSLLK(1)K	2	0.1015	1	0.679	0.702	0.684	1.21	1.197	1.239	1.766	1.2118e-06
P36776	688	K	Lon protease homolog, mitochondrial OS=Homo sapiens OX=9606 GN=LONP1 PE=1 SV=2	LONP1	1	7.57427e-06	121.02	ALCGLDESK(1)AK	2	-0.065326	2	1.339	1.289	1.514	0.714	0.76	0.77	0.542	0.00034189
P36776	145	K	Lon protease homolog, mitochondrial OS=Homo sapiens OX=9606 GN=LONP1 PE=1 SV=2	LONP1	1	0.00960907	76.847	IIEVK(1)NK	3	-2.0753	1	0.9	1	0.964	1.093	1.034	0.985	1.087	0.126078
P36776	498	K	Lon protease homolog, mitochondrial OS=Homo sapiens OX=9606 GN=LONP1 PE=1 SV=2	LONP1	1	1.14733e-10	119.8	AQAVLEEDHYGMEDVK(1)K	3	0.97684	1	0.849	0.977	0.966	1.097	1.076	0.984	1.131	0.092138
P36776	393	K	Lon protease homolog, mitochondrial OS=Homo sapiens OX=9606 GN=LONP1 PE=1 SV=2	LONP1	1	0.000201503	123.35	K(1)YLLQEQLK	3	0.91671	2	1.041	0.968	1.02	0.992	1.018	0.99	0.99	0.71372
P36776	529	K	Lon protease homolog, mitochondrial OS=Homo sapiens OX=9606 GN=LONP1 PE=1 SV=2	LONP1	1	0.00598664	43.208	ILCFYGPPGVGK(1)TSIAR	3	0.65483	1
P36776	581	K	Lon protease homolog, mitochondrial OS=Homo sapiens OX=9606 GN=LONP1 PE=1 SV=2	LONP1	1	6.52418e-12	124.25	TK(1)TENPLILIDEVDK	3	-0.38663	1	1.328	1.328	1.254	0.784	0.808	0.813	0.615	2.2822e-05
P36871	3	K	Phosphoglucomutase-1 OS=Homo sapiens OX=9606 GN=PGM1 PE=1 SV=3	PGM1	1	0.0137953	93.267	VK(1)IVTVK	2	0.53791	1
P36871	419	K	Phosphoglucomutase-1 OS=Homo sapiens OX=9606 GN=PGM1 PE=1 SV=3	PGM1	1	0.00283553	110.41	DHWQK(1)YGR	2	-1.1813	2	0.889	0.892	0.944	1.139	1.017	1.05	1.177	0.0142046
P36952	189	K	Serpin B5 OS=Homo sapiens OX=9606 GN=SERPINB5 PE=1 SV=2	SERPINB5	1	0.0232251	84.083	VNK(1)TDTK	2	-1.5427	1	1.253	1.296	1.26	0.877	0.776	0.821	0.65	0.00030077
P36952	122	K	Serpin B5 OS=Homo sapiens OX=9606 GN=SERPINB5 PE=1 SV=2	SERPINB5	1	5.5153e-10	150.06	ELETVDFK(1)DK	2	0.24692	2	0.899	0.847	0.919	1.095	1.096	1.054	1.218	0.0020171
P36957	353	K	Dihydrolipoyllysine-residue succinyltransferase component of 2-oxoglutarate dehydrogenase complex, mitochondrial OS=Homo sapiens OX=9606 GN=DLST PE=1 SV=4	DLST	1	0.00021646	81.09	TITELGEK(1)AR	2	-0.16803	1
P36957	267	K	Dihydrolipoyllysine-residue succinyltransferase component of 2-oxoglutarate dehydrogenase complex, mitochondrial OS=Homo sapiens OX=9606 GN=DLST PE=1 SV=4	DLST	1	0.0433107	45.335	HK(1)EAFLK	3	-0.12178	1
P37059	252	K	Estradiol 17-beta-dehydrogenase 2 OS=Homo sapiens OX=9606 GN=HSD17B2 PE=1 SV=1	HSD17B2	1	0.00141145	97.734	LELSK(1)WGIK	3	0.69419	2	0.719	0.755	0.681	1.184	1.062	1.336	1.662	0.0022599
P37198	504	K	Nuclear pore glycoprotein p62 OS=Homo sapiens OX=9606 GN=NUP62 PE=1 SV=3	NUP62	0.999971	0.00303551	61.167	KVEEVTK(1)VCEGR	3	0.24462	1	1.4	1.423	1.33	0.705	0.813	0.724	0.54	0.00021721
P37802	40	K	Transgelin-2 OS=Homo sapiens OX=9606 GN=TAGLN2 PE=1 SV=3	TAGLN2	1	0.000103609	115.91	K(1)DVGRPQPGR	3	0.41102	3	1.643	1.658	1.609	0.563	0.571	0.596	0.352	3.499e-07
P37802	171	K	Transgelin-2 OS=Homo sapiens OX=9606 GN=TAGLN2 PE=1 SV=3	TAGLN2	1	2.05192e-24	142.93	NFSDNQLQEGK(1)NVIGLQMGTNR	3	-1.2656	1	1.003	0.968	0.885	1.138	1.012	0.975	1.094	0.20908
P37802	17	K	Transgelin-2 OS=Homo sapiens OX=9606 GN=TAGLN2 PE=1 SV=3	TAGLN2	1	0.00134118	123.79	EVQQK(1)IEK	3	0.033283	2	0.97	0.892	0.882	1.072	1.071	1.05	1.164	0.007724
P37802	153	K	Transgelin-2 OS=Homo sapiens OX=9606 GN=TAGLN2 PE=1 SV=3	TAGLN2	1	3.89167e-05	92.939	DDGLFSGDPNWFPK(1)K	3	-2.1399	1	1.028	0.979	0.981	1.031	1.01	0.988	1.014	0.5328
P37837	203	K	Transaldolase OS=Homo sapiens OX=9606 GN=TALDO1 PE=1 SV=2	TALDO1	1	0.00987562	52.576	ILDWHVANTDK(1)K	3	-0.071466	1	0.836	0.839	0.916	1.12	1.109	1.066	1.272	0.00197647
P37837	225	K	Transaldolase OS=Homo sapiens OX=9606 GN=TALDO1 PE=1 SV=2	TALDO1	1	0.00979283	100.19	IYNYYK(1)K	2	-0.30533	1	0.937	0.964	0.905	0.993	1.026	1.124	1.12	0.053062
P37837	204	K	Transaldolase OS=Homo sapiens OX=9606 GN=TALDO1 PE=1 SV=2	TALDO1	1	0.00137396	81.185	K(1)SYEPLEDPGVK	2	-0.76782	2	0.774	0.794	0.803	1.18	1.095	1.165	1.451	0.00012459
P37837	286	K	Transaldolase OS=Homo sapiens OX=9606 GN=TALDO1 PE=1 SV=2	TALDO1	1	8.74531e-05	89.358	AAQASDLEK(1)IHLDEK	3	-1.5077	1	0.879	0.769	0.794	1.07	1.132	1.19	1.389	0.0028956
P37837	314	K	Transaldolase OS=Homo sapiens OX=9606 GN=TALDO1 PE=1 SV=2	TALDO1	1	0.0202631	77.662	K(1)FAADAVK	2	-0.70373	1	0.99	0.918	0.842	1.105	1.073	1.015	1.161	0.046501
P37837	215	K	Transaldolase OS=Homo sapiens OX=9606 GN=TALDO1 PE=1 SV=2	TALDO1	1	3.23542e-08	107.74	SYEPLEDPGVK(1)SVTK	3	0.30133	1	0.94	0.928	0.959	1.164	0.951	1.026	1.111	0.163043
P37837	136	K	Transaldolase OS=Homo sapiens OX=9606 GN=TALDO1 PE=1 SV=2	TALDO1	1	0.0122691	83.456	EAGISK(1)DR	2	-0.54939	1	0.822	1.009	0.887	1.079	1.056	1.068	1.178	0.108085
P37837	219	K	Transaldolase OS=Homo sapiens OX=9606 GN=TALDO1 PE=1 SV=2	TALDO1	1	4.05874e-05	122.7	SVTK(1)IYNYYK	2	0.48414	3	1.007	1.018	1.089	1.048	0.964	0.933	0.946	0.25416
P37837	292	K	Transaldolase OS=Homo sapiens OX=9606 GN=TALDO1 PE=1 SV=2	TALDO1	1	0.0092302	59.645	IHLDEK(1)SFR	3	0.064268	1	0.92	1.038	0.938	0.99	1.059	1.035	1.065	0.20546
P37837	321	K	Transaldolase OS=Homo sapiens OX=9606 GN=TALDO1 PE=1 SV=2	TALDO1	1	0.0304371	46.844	FAADAVK(1)LER	2	1.1146	1
P38117	116	K	Electron transfer flavoprotein subunit beta OS=Homo sapiens OX=9606 GN=ETFB PE=1 SV=3	ETFB	1	0.000353207	107.09	EK(1)VDLVLLGK	2	-0.23326	2	1.013	1.102	1.083	0.895	1.019	0.963	0.9	0.079235
P38159	86	K	RNA-binding motif protein, X chromosome OS=Homo sapiens OX=9606 GN=RBMX PE=1 SV=3	RBMX	1	4.34862e-11	131.96	VEQATK(1)PSFESGR	2	-0.33074	1	1.039	0.939	1.054	0.924	1.129	0.943	0.988	0.85018
P38606	132	K	V-type proton ATPase catalytic subunit A OS=Homo sapiens OX=9606 GN=ATP6V1A PE=1 SV=2	ATP6V1A	1	0.000353207	107.09	DIK(1)WDFTPCK	2	-0.13164	2	1.639	1.537	1.502	0.652	0.641	0.6	0.405	1.77762e-05
P38646	468	K	Stress-70 protein, mitochondrial OS=Homo sapiens OX=9606 GN=HSPA9 PE=1 SV=2	HSPA9	1	3.88498e-14	125.73	K(1)SQVFSTAADGQTQVEIK	3	-0.073095	2	1.032	0.998	1.076	1.004	0.929	1.013	0.948	0.20406
P38646	234	K	Stress-70 protein, mitochondrial OS=Homo sapiens OX=9606 GN=HSPA9 PE=1 SV=2	HSPA9	1	9.31687e-39	161.08	VINEPTAAALAYGLDK(1)SEDK	3	-0.18481	1	0.941	0.861	1.011	1.076	1.039	1.031	1.118	0.07778
P38646	138	K	Stress-70 protein, mitochondrial OS=Homo sapiens OX=9606 GN=HSPA9 PE=1 SV=2	HSPA9	1	0.00711757	91.867	DIK(1)NVPFK	2	0.025688	2	1.068	1.09	1.027	0.983	0.951	0.961	0.909	0.0089035
P38646	600	K	Stress-70 protein, mitochondrial OS=Homo sapiens OX=9606 GN=HSPA9 PE=1 SV=2	HSPA9	1	0.000117655	87.519	MEEFK(1)DQLPADECNK	3	-1.5152	1	1.063	1.088	1.106	0.942	0.977	0.925	0.873	0.0023591
P38646	288	K	Stress-70 protein, mitochondrial OS=Homo sapiens OX=9606 GN=HSPA9 PE=1 SV=2	HSPA9	1	0.0125723	81.296	HIVK(1)EFK	2	-0.89067	2	1.117	1.093	1.046	0.936	0.934	0.976	0.874	0.0050219
P38646	135	K	Stress-70 protein, mitochondrial OS=Homo sapiens OX=9606 GN=HSPA9 PE=1 SV=2	HSPA9	1	0.0220499	44.511	RYDDPEVQK(1)DIK	3	1.2251	1	1.188	1.194	1.466	0.811	0.874	0.76	0.635	0.0049409
P38646	121	K	Stress-70 protein, mitochondrial OS=Homo sapiens OX=9606 GN=HSPA9 PE=1 SV=2	HSPA9	1	1.36504e-16	138.05	QAVTNPNNTFYATK(1)R	2	0.77933	1	0.656	0.728	0.995	1.164	1.241	1.027	1.443	0.050281
P38646	567	K	Stress-70 protein, mitochondrial OS=Homo sapiens OX=9606 GN=HSPA9 PE=1 SV=2	HSPA9	1	2.29174e-05	105.65	NAEK(1)YAEEDR	2	0.06958	2	1.066	1.071	0.905	1.075	0.881	1.039	0.985	0.85368
P38646	467	K	Stress-70 protein, mitochondrial OS=Homo sapiens OX=9606 GN=HSPA9 PE=1 SV=2	HSPA9	1	0.00626084	93.667	NTTIPTK(1)K	2	-0.20563	1	0.979	0.972	0.991	1.019	1.033	1.005	1.039	0.0170436
P38646	610	K	Stress-70 protein, mitochondrial OS=Homo sapiens OX=9606 GN=HSPA9 PE=1 SV=2	HSPA9	1	7.21665e-07	118.51	DQLPADECNK(1)LK	2	0.36047	2	1.398	1.32	1.299	0.768	0.756	0.809	0.581	5.8315e-05
P38646	653	K	Stress-70 protein, mitochondrial OS=Homo sapiens OX=9606 GN=HSPA9 PE=1 SV=2	HSPA9	1	0.00627225	93.649	LFEMAYK(1)K	2	-0.45689	1	0.881	0.903	0.801	1.123	1.081	1.097	1.277	0.0030014
P38919	289	K	Eukaryotic initiation factor 4A-III OS=Homo sapiens OX=9606 GN=EIF4A3 PE=1 SV=4	EIF4A3	1	0.00344332	106.4	K(1)VDWLTEK	3	-0.53478	2	1.039	1.046	1.088	0.935	0.994	0.97	0.914	0.0167575
P38919	70	K	Eukaryotic initiation factor 4A-III OS=Homo sapiens OX=9606 GN=EIF4A3 PE=1 SV=4	EIF4A3	1	0.00940839	100.19	AIK(1)QIIK	2	0.5827	1	1.181	1.135	1.117	0.91	0.888	0.929	0.794	0.00040004
P38919	321	K	Eukaryotic initiation factor 4A-III OS=Homo sapiens OX=9606 GN=EIF4A3 PE=1 SV=4	EIF4A3	1	0.0244958	74.6	ESIMK(1)EFR	2	0.81936	1	0.927	0.933	0.846	1.062	1.01	1.143	1.188	0.022842
P39019	38	K	40S ribosomal protein S19 OS=Homo sapiens OX=9606 GN=RPS19 PE=1 SV=2	RPS19	1	0.00944427	61.11	VPEWVDTVK(1)LAK	2	-0.46627	1	0.899	0.965	1.015	1.032	0.994	1.07	1.075	0.148639
P39019	77	K	40S ribosomal protein S19 OS=Homo sapiens OX=9606 GN=RPS19 PE=1 SV=2	RPS19	1	4.99655e-08	115.04	GGAGVGSMTK(1)IYGGR	2	0.53655	1	0.903	0.94	0.902	1.065	1.056	1.067	1.161	0.00042283
P39019	29	K	40S ribosomal protein S19 OS=Homo sapiens OX=9606 GN=RPS19 PE=1 SV=2	RPS19	1	2.12577e-05	116.51	LK(1)VPEWVDTVK	3	0.59172	2	0.915	0.95	0.897	1.045	1.061	1.07	1.15	0.00153977
P39023	155	K	60S ribosomal protein L3 OS=Homo sapiens OX=9606 GN=RPL3 PE=1 SV=2	RPL3	1	0.0383226	76.774	K(1)YCQVIR	2	-0.20345	2	1.428	1.386	1.372	0.71	0.734	0.775	0.53	2.1524e-05
P39023	385	K	60S ribosomal protein L3 OS=Homo sapiens OX=9606 GN=RPL3 PE=1 SV=2	RPL3	1	0.00257796	113.93	FQTMEEK(1)K	2	-0.016139	1	0.949	0.971	0.983	0.97	1.078	1.031	1.061	0.146699
P39023	341	K	60S ribosomal protein L3 OS=Homo sapiens OX=9606 GN=RPL3 PE=1 SV=2	RPL3	1	0.0219442	76.679	GCVVGTK(1)K	3	-1.1525	2	1.633	1.637	1.526	0.635	0.545	0.63	0.377	5.9053e-05
P39023	136	K	60S ribosomal protein L3 OS=Homo sapiens OX=9606 GN=RPL3 PE=1 SV=2	RPL3	1	0.00322946	107.79	K(1)WQDEDGK	2	0.81854	2	1.454	1.503	1.438	0.696	0.723	0.66	0.473	1.7225e-05
P39023	349	K	60S ribosomal protein L3 OS=Homo sapiens OX=9606 GN=RPL3 PE=1 SV=2	RPL3	1	1.68412e-05	104.43	K(1)SLLVQTK	2	3.1283	1
P39023	154	K	60S ribosomal protein L3 OS=Homo sapiens OX=9606 GN=RPL3 PE=1 SV=2	RPL3	1	0.01854	89.355	DFSSMK(1)K	3	0.18564	2	1.407	1.347	1.282	0.773	0.768	0.783	0.576	3.8194e-05
P39023	366	K	60S ribosomal protein L3 OS=Homo sapiens OX=9606 GN=RPL3 PE=1 SV=2	RPL3	1	0.000391933	92.939	IDLK(1)FIDTTSK	3	0.3225	2	0.89	0.984	0.874	1.091	1.045	1.052	1.16	0.0188214
P39023	300	K	60S ribosomal protein L3 OS=Homo sapiens OX=9606 GN=RPL3 PE=1 SV=2	RPL3	1	3.07278e-06	102.65	LIK(1)NNASTDYDLSDK	3	0.075772	1	0.933	0.883	0.915	1.086	1.021	1.093	1.172	0.0042593
P39023	272	K	60S ribosomal protein L3 OS=Homo sapiens OX=9606 GN=RPL3 PE=1 SV=2	RPL3	1	0.000207622	119.21	AGQK(1)GYHHR	3	-0.5871	1	0.652	0.823	0.977	1.07	1.177	1.129	1.377	0.050737
P39023	120	K	60S ribosomal protein L3 OS=Homo sapiens OX=9606 GN=RPL3 PE=1 SV=2	RPL3	1	0.00334202	94.407	FYK(1)NWHK	3	-0.62531	1	0.97	1.007	0.941	1.057	1.031	0.987	1.054	0.134898
P39023	286	K	60S ribosomal protein L3 OS=Homo sapiens OX=9606 GN=RPL3 PE=1 SV=2	RPL3	1	0.00921868	53.237	IYK(1)IGQGYLIK	3	0.42923	1	1.051	0.996	0.949	0.961	1.046	1.012	1.008	0.847
P39023	250	K	60S ribosomal protein L3 OS=Homo sapiens OX=9606 GN=RPL3 PE=1 SV=2	RPL3	1	0.000536967	81.676	K(1)VACIGAWHPAR	3	-1.0488	1	0.923	0.992	1.063	1.054	0.95	1.028	1.018	0.73498
P39023	115	K	60S ribosomal protein L3 OS=Homo sapiens OX=9606 GN=RPL3 PE=1 SV=2	RPL3	1	0.000290809	84.734	TVFAEHISDECK(1)R	3	-0.2477	1	0.682	0.738	0.796	1.244	1.216	1.088	1.601	0.00150122
P39023	393	K	60S ribosomal protein L3 OS=Homo sapiens OX=9606 GN=RPL3 PE=1 SV=2	RPL3	1	0.0371558	67.981	AFMGPLK(1)K	2	1.9825	1	0.967	1.007	0.835	1.044	1.003	1.1	1.12	0.138498
P39023	66	K	60S ribosomal protein L3 OS=Homo sapiens OX=9606 GN=RPL3 PE=1 SV=2	RPL3	1	0.0020035	71.153	EVDRPGSK(1)VNK	3	-0.11062	1	0.705	0.753	0.721	1.174	1.195	1.199	1.637	1.8678e-05
P39023	132	K	60S ribosomal protein L3 OS=Homo sapiens OX=9606 GN=RPL3 PE=1 SV=2	RPL3	1	0.0157962	91.318	AFTK(1)YCK	2	-0.018729	1	0.797	0.746	0.778	1.167	1.184	1.127	1.498	7.7756e-05
P39023	229	K	60S ribosomal protein L3 OS=Homo sapiens OX=9606 GN=RPL3 PE=1 SV=2	RPL3	1	0.0252107	74.165	GYK(1)GVTSR	2	-1.1047	1	1.03	1.006	0.966	0.972	1.034	1.01	1.005	0.86592
P39210	82	K	Protein Mpv17 OS=Homo sapiens OX=9606 GN=MPV17 PE=1 SV=1	MPV17	1	0.0233201	53.448	FIPGTTK(1)VDALK	2	-0.93063	1	0.966	0.981	0.999	1.077	0.93	1.049	1.037	0.49392
P39656	189	K	Dolichyl-diphosphooligosaccharide--protein glycosyltransferase 48 kDa subunit OS=Homo sapiens OX=9606 GN=DDOST PE=1 SV=4	DDOST	1	0.000283775	79.337	APTIVGK(1)SSLNPILFR	3	-1.582	2	1.196	1.162	1.223	0.869	0.928	0.831	0.734	0.0009231
P39656	374	K	Dolichyl-diphosphooligosaccharide--protein glycosyltransferase 48 kDa subunit OS=Homo sapiens OX=9606 GN=DDOST PE=1 SV=4	DDOST	1	0.0014322	104.22	GGK(1)YSVQFK	2	-1.6871	1	0.795	0.782	0.746	1.186	1.145	1.144	1.496	5.8356e-05
P39687	20	K	Acidic leucine-rich nuclear phosphoprotein 32 family member A OS=Homo sapiens OX=9606 GN=ANP32A PE=1 SV=1	ANP32A	1	0.000325487	73.834	TPSDVK(1)ELVLDNSR	3	1.3985	1	0.763	0.99	0.754	1.255	1.08	1.021	1.339	0.052061
P39687	110	K	Acidic leucine-rich nuclear phosphoprotein 32 family member A OS=Homo sapiens OX=9606 GN=ANP32A PE=1 SV=1	ANP32A	1	4.04471e-10	152.64	DLSTIEPLK(1)K	3	0.29352	4	1.034	1.09	1.145	0.975	0.939	0.921	0.867	0.0138174
P39748	252	K	Flap endonuclease 1 OS=Homo sapiens OX=9606 GN=FEN1 PE=1 SV=1	FEN1	1	0.0071046	63.816	AVDLIQK(1)HK	3	1.2859	2	0.996	1.007	0.981	0.974	1.044	1.007	1.014	0.56836
P39748	375	K	Flap endonuclease 1 OS=Homo sapiens OX=9606 GN=FEN1 PE=1 SV=1	FEN1	1	0.00781029	71.379	TGAAGK(1)FK	3	0.36582	1	0.705	0.708	0.735	1.166	1.305	1.121	1.672	0.00041838
P39748	135	K	Flap endonuclease 1 OS=Homo sapiens OX=9606 GN=FEN1 PE=1 SV=1	FEN1	1	5.81792e-05	112.7	VTK(1)QHNDECK	3	-0.11172	1	1.349	1.366	1.33	0.77	0.784	0.76	0.572	6.089e-07
P40121	137	K	Macrophage-capping protein OS=Homo sapiens OX=9606 GN=CAPG PE=1 SV=2	CAPG	1	0.000132421	100.93	TSTGAPAAIK(1)K	2	-0.76429	2	1.049	0.949	0.998	1.026	1	0.998	1.009	0.75628
P40121	253	K	Macrophage-capping protein OS=Homo sapiens OX=9606 GN=CAPG PE=1 SV=2	CAPG	1	9.73326e-12	105.96	ANAQAAALYK(1)VSDATGQMNLTK	3	-0.58816	1	0.952	0.957	0.998	1.067	1.019	0.998	1.061	0.075961
P40121	115	K	Macrophage-capping protein OS=Homo sapiens OX=9606 GN=CAPG PE=1 SV=2	CAPG	1	2.23033e-06	103.88	GLK(1)YQEGGVESAFHK	3	0.72667	1	0.94	0.875	0.908	1.018	1.141	1.046	1.177	0.0155977
P40121	143	K	Macrophage-capping protein OS=Homo sapiens OX=9606 GN=CAPG PE=1 SV=2	CAPG	1	0.0176118	89.55	LYQVK(1)GK	2	1.4992	2	1.018	1.027	1.059	1.007	0.963	0.978	0.95	0.043779
P40121	297	K	Macrophage-capping protein OS=Homo sapiens OX=9606 GN=CAPG PE=1 SV=2	CAPG	1	0.00422099	110.61	IYIWK(1)GR	2	0.56745	1	1.101	1.024	1.178	0.971	0.909	0.936	0.853	0.02406
P40222	240	K	Alpha-taxilin OS=Homo sapiens OX=9606 GN=TXLNA PE=1 SV=3	TXLNA	1	0.0126521	82.831	SK(1)LESLCR	2	-1.4255	1	1.179	1.112	1.135	0.899	0.919	0.913	0.797	0.00024357
P40222	195	K	Alpha-taxilin OS=Homo sapiens OX=9606 GN=TXLNA PE=1 SV=3	TXLNA	1	0.0100516	58.829	K(1)YAELLEEHR	3	1.4328	1	1.185	1.172	1.173	0.852	0.946	0.863	0.754	0.0133794
P40227	251	K	T-complex protein 1 subunit zeta OS=Homo sapiens OX=9606 GN=CCT6A PE=1 SV=3	CCT6A	1	0.000383173	88.565	TEVNSGFFYK(1)SAEER	3	-0.15009	2	1.064	1.045	1.14	0.925	0.979	0.944	0.877	0.0137227
P40227	127	K	T-complex protein 1 subunit zeta OS=Homo sapiens OX=9606 GN=CCT6A PE=1 SV=3	CCT6A	1	0.000190453	89.301	IITEGFEAAK(1)EK	3	0.92055	1	0.837	0.899	0.925	1.135	0.924	1.184	1.219	0.078622
P40227	287	K	T-complex protein 1 subunit zeta OS=Homo sapiens OX=9606 GN=CCT6A PE=1 SV=3	CCT6A	1	1.76708e-06	104.55	VCGDSDK(1)GFVVINQK	3	-0.21642	1	1.491	1.647	1.328	0.635	0.687	0.707	0.454	0.00035906
P40227	381	K	T-complex protein 1 subunit zeta OS=Homo sapiens OX=9606 GN=CCT6A PE=1 SV=3	CCT6A	1	0.00123083	74.962	GPNK(1)HTLTQIK	3	-0.071046	2	1.07	1.034	1.046	0.983	0.991	0.946	0.927	0.0122815
P40227	41	K	T-complex protein 1 subunit zeta OS=Homo sapiens OX=9606 GN=CCT6A PE=1 SV=3	CCT6A	1	0.000262634	98.368	TNLGPK(1)GTMK	3	1.5704	2	0.992	0.975	0.98	1.001	1.007	1.044	1.036	0.068797
P40261	43	K	Nicotinamide N-methyltransferase OS=Homo sapiens OX=9606 GN=NNMT PE=1 SV=1	NNMT	1	0.01336	62.464	HLLK(1)NLFK	3	0.65454	1
P40306	68	K	Proteasome subunit beta type-10 OS=Homo sapiens OX=9606 GN=PSMB10 PE=1 SV=1	PSMB10	1	9.94046e-06	101.53	ATNDSVVADK(1)SCEK	3	-1.1318	1	1.138	1.073	1.232	0.874	0.934	0.908	0.789	0.0060393
P40429	197	K	60S ribosomal protein L13a OS=Homo sapiens OX=9606 GN=RPL13A PE=1 SV=2	RPL13A	1	0.000190453	93.623	YTEVLK(1)THGLLV	3	-0.13998	2	0.929	1.042	1.102	0.933	1.092	0.937	0.964	0.63498
P40429	159	K	60S ribosomal protein L13a OS=Homo sapiens OX=9606 GN=RPL13A PE=1 SV=2	RPL13A	1	0.00105726	83.087	YQAVTATLEEK(1)R	3	0.069075	2	0.942	0.877	0.981	1.046	1.05	1.056	1.126	0.068076
P40429	114	K	60S ribosomal protein L13a OS=Homo sapiens OX=9606 GN=RPL13A PE=1 SV=2	RPL13A	1	0.00831181	53.448	VFDGIPPPYDK(1)K	3	0.19707	1	0.937	1.102	0.901	1.004	1.079	0.974	1.04	0.57444
P40763	383	K	Signal transducer and activator of transcription 3 OS=Homo sapiens OX=9606 GN=STAT3 PE=1 SV=2	STAT3	1	0.00136707	79.659	K(1)FNILGTNTK	3	0.25513	1	1.099	0.994	1.104	0.9	1.007	0.977	0.902	0.098238
P40925	298	K	Malate dehydrogenase, cytoplasmic OS=Homo sapiens OX=9606 GN=MDH1 PE=1 SV=4	MDH1	1	0.000156143	85.176	TWK(1)FVEGLPINDFSR	3	-0.14895	1	0.806	0.853	0.775	1.042	1.531	0.83	1.398	0.23536
P40925	118	K	Malate dehydrogenase, cytoplasmic OS=Homo sapiens OX=9606 GN=MDH1 PE=1 SV=4	MDH1	1	3.15448e-05	113.76	SQGAALDK(1)YAK	2	0.63383	4	1.051	1.001	0.982	0.998	1	0.998	0.987	0.60782
P40925	236	K	Malate dehydrogenase, cytoplasmic OS=Homo sapiens OX=9606 GN=MDH1 PE=1 SV=4	MDH1	1	0.0113751	84.916	GAAVIK(1)AR	2	-0.41522	1	1.041	1.061	1.128	0.968	0.869	1.024	0.886	0.084564
P40925	110	K	Malate dehydrogenase, cytoplasmic OS=Homo sapiens OX=9606 GN=MDH1 PE=1 SV=4	MDH1	1	2.76762e-08	142.38	IFK(1)SQGAALDK	3	0.53471	3	1.018	1.054	0.969	1.033	0.974	0.986	0.984	0.6326
P40925	107	K	Malate dehydrogenase, cytoplasmic OS=Homo sapiens OX=9606 GN=MDH1 PE=1 SV=4	MDH1	1	0.014601	85.212	ANVK(1)IFK	3	0.033758	2	0.957	0.953	0.904	1.055	0.993	1.095	1.117	0.031397
P40926	324	K	Malate dehydrogenase, mitochondrial OS=Homo sapiens OX=9606 GN=MDH2 PE=1 SV=3	MDH2	1	0.00306098	53.3	MISDAIPELK(1)ASIK	3	3.0168	1	1.063	1.085	1.057	1.004	0.948	0.93	0.899	0.0118358
P40926	296	K	Malate dehydrogenase, mitochondrial OS=Homo sapiens OX=9606 GN=MDH2 PE=1 SV=3	MDH2	1	1.26753e-06	101.92	SQETECTYFSTPLLLGK(1)K	3	-0.20431	1	1.005	0.918	0.938	1.112	0.988	1.018	1.09	0.128856
P40926	185	K	Malate dehydrogenase, mitochondrial OS=Homo sapiens OX=9606 GN=MDH2 PE=1 SV=3	MDH2	1	2.00055e-27	164.53	ANTFVAELK(1)GLDPAR	2	-0.67392	2	1.164	1.176	1.185	0.928	0.839	0.898	0.756	0.00074053
P40926	335	K	Malate dehydrogenase, mitochondrial OS=Homo sapiens OX=9606 GN=MDH2 PE=1 SV=3	MDH2	0.999416	0.0255233	47.712	K(0.001)GEDFVK(0.999)TLK	3	0.08156	1	1.141	1.093	1.055	0.925	0.931	0.968	0.859	0.0047161
P40926	239	K	Malate dehydrogenase, mitochondrial OS=Homo sapiens OX=9606 GN=MDH2 PE=1 SV=3	MDH2	1	1.88993e-07	125.97	IQEAGTEVVK(1)AK	2	-3.5338	1	1.025	1.073	1.028	0.976	0.936	1.018	0.937	0.083581
P40926	157	K	Malate dehydrogenase, mitochondrial OS=Homo sapiens OX=9606 GN=MDH2 PE=1 SV=3	MDH2	1	0.000499786	108.57	K(1)HGVYNPNK	3	-0.36942	5	1.116	1.155	1.113	0.939	0.905	0.915	0.815	0.00022345
P40926	307	K	Malate dehydrogenase, mitochondrial OS=Homo sapiens OX=9606 GN=MDH2 PE=1 SV=3	MDH2	1	4.02235e-10	123.72	NLGIGK(1)VSSFEEK	2	-0.70847	1	1.091	1.117	1.158	0.896	0.959	0.914	0.823	0.00182433
P40926	78	K	Malate dehydrogenase, mitochondrial OS=Homo sapiens OX=9606 GN=MDH2 PE=1 SV=3	MDH2	1	0.000106126	82.59	AAVK(1)GYLGPEQLPDCLK	3	0.39481	1	1.144	1.078	1.125	0.966	0.906	0.915	0.833	0.0023434
P40926	301	K	Malate dehydrogenase, mitochondrial OS=Homo sapiens OX=9606 GN=MDH2 PE=1 SV=3	MDH2	1	0.000209668	113.22	GIEK(1)NLGIGK	2	-0.79563	2	1.221	1.15	1.117	0.931	0.913	0.852	0.773	0.0023629
P40939	359	K	Trifunctional enzyme subunit alpha, mitochondrial OS=Homo sapiens OX=9606 GN=HADHA PE=1 SV=2	HADHA	1	0.0263433	46.462	FGAPQK(1)DVK	3	0.04089	1	1.029	0.959	1.175	0.963	0.944	0.998	0.918	0.2559
P40939	386	K	Trifunctional enzyme subunit alpha, mitochondrial OS=Homo sapiens OX=9606 GN=HADHA PE=1 SV=2	HADHA	1	0.0280241	80.438	GLK(1)TILK	2	-0.86368	1	1.339	1.26	1.288	0.844	0.803	0.78	0.624	8.2494e-05
P40939	569	K	Trifunctional enzyme subunit alpha, mitochondrial OS=Homo sapiens OX=9606 GN=HADHA PE=1 SV=2	HADHA	1	0.000824408	82.417	ILQEGVDPK(1)K	2	0.419	2	1.423	1.253	1.347	0.751	0.799	0.782	0.58	0.000183724
P40939	60	K	Trifunctional enzyme subunit alpha, mitochondrial OS=Homo sapiens OX=9606 GN=HADHA PE=1 SV=2	HADHA	1	0.000326831	92.38	INSPNSK(1)VNTLSK	2	1.332	1	1.576	1.647	1.499	0.632	0.583	0.645	0.394	2.1245e-05
P40939	166	K	Trifunctional enzyme subunit alpha, mitochondrial OS=Homo sapiens OX=9606 GN=HADHA PE=1 SV=2	HADHA	1	3.93185e-10	90.475	K(1)TVLGTPEVLLGALPGAGGTQR	3	0.12312	1	1.152	1.067	0.825	0.948	1.094	0.952	0.984	0.9401
P40939	353	K	Trifunctional enzyme subunit alpha, mitochondrial OS=Homo sapiens OX=9606 GN=HADHA PE=1 SV=2	HADHA	1	0.00293526	99.442	NK(1)FGAPQK	3	-0.27395	2	2.008	1.903	1.879	0.398	0.379	0.367	0.198	4.0698e-07
P40939	644	K	Trifunctional enzyme subunit alpha, mitochondrial OS=Homo sapiens OX=9606 GN=HADHA PE=1 SV=2	HADHA	1	4.34993e-05	101.89	GFYIYQEGVK(1)R	2	-1.1374	3	1.474	1.433	1.437	0.671	0.714	0.728	0.486	1.51598e-05
P40939	411	K	Trifunctional enzyme subunit alpha, mitochondrial OS=Homo sapiens OX=9606 GN=HADHA PE=1 SV=2	HADHA	1	0.0197409	87.476	GLNDK(1)VK	2	-0.16327	1	2.009	2.02	1.874	0.359	0.375	0.331	0.18	1.2788e-06
P40939	735	K	Trifunctional enzyme subunit alpha, mitochondrial OS=Homo sapiens OX=9606 GN=HADHA PE=1 SV=2	HADHA	1	0.0095576	88.495	K(1)YEAAYGK	2	0.6585	2	1.358	1.433	1.45	0.712	0.759	0.709	0.514	2.203e-05
P41091	90	K	Eukaryotic translation initiation factor 2 subunit 3 OS=Homo sapiens OX=9606 GN=EIF2S3 PE=1 SV=3	EIF2S3	1	0.000208408	81.992	IYK(1)LDDPSCPRPECYR	3	-0.10429	1	1.176	1.255	1.235	0.905	0.829	0.836	0.701	0.00047896
P41091	183	K	Eukaryotic translation initiation factor 2 subunit 3 OS=Homo sapiens OX=9606 GN=EIF2S3 PE=1 SV=3	EIF2S3	1	2.16288e-08	109.66	LK(1)HILILQNK	3	-0.58194	1
P41091	449	K	Eukaryotic translation initiation factor 2 subunit 3 OS=Homo sapiens OX=9606 GN=EIF2S3 PE=1 SV=3	EIF2S3	1	0.0333208	55.676	RVEK(1)HWR	3	0.2365	1	0.664	0.912	0.895	1.125	1.019	1.218	1.361	0.051764
P41223	42	K	Protein BUD31 homolog OS=Homo sapiens OX=9606 GN=BUD31 PE=1 SV=2	BUD31	1	0.00143101	87.667	K(1)VESLWPIFR	2	0.12943	1	0.879	0.925	0.916	1.032	1.081	1.089	1.177	0.0020782
P41223	56	K	Protein BUD31 homolog OS=Homo sapiens OX=9606 GN=BUD31 PE=1 SV=2	BUD31	1	0.000190515	123.69	IHHQK(1)TR	3	-0.67118	1	1.047	1.177	1.016	0.971	0.904	0.979	0.881	0.071581
P41250	733	K	Glycine--tRNA ligase OS=Homo sapiens OX=9606 GN=GARS1 PE=1 SV=3	GARS1	1	0.0041527	58.172	YPLFEGQETGK(1)K	3	0.76862	1	0.889	0.897	0.897	1.106	1.009	1.116	1.204	0.029277
P41250	197	K	Glycine--tRNA ligase OS=Homo sapiens OX=9606 GN=GARS1 PE=1 SV=3	GARS1	1	0.000334557	72.898	TSGHVDK(1)FADFMVK	3	0.17492	1	1.033	1.063	1.272	0.891	1.019	0.855	0.821	0.080057
P41250	553	K	Glycine--tRNA ligase OS=Homo sapiens OX=9606 GN=GARS1 PE=1 SV=3	GARS1	1	8.80998e-08	120.53	TFQLTK(1)DMINVK	3	0.9602	2	1.127	1.034	1.065	0.907	0.963	0.994	0.888	0.031979
P41250	123	K	Glycine--tRNA ligase OS=Homo sapiens OX=9606 GN=GARS1 PE=1 SV=3	GARS1	1	0.0320036	70.028	AK(1)MEDTLK	2	-0.067133	1	0.955	1.06	1.082	0.961	0.974	1.011	0.951	0.3056
P41250	426	K	Glycine--tRNA ligase OS=Homo sapiens OX=9606 GN=GARS1 PE=1 SV=3	GARS1	1	0.0346902	59.908	VGISPDK(1)LR	2	0.72382	1	0.941	1.054	0.964	1.106	0.924	1.019	1.03	0.67174
P41250	646	K	Glycine--tRNA ligase OS=Homo sapiens OX=9606 GN=GARS1 PE=1 SV=3	GARS1	1	8.35065e-09	112.67	HGVSHK(1)VDDSSGSIGR	3	-0.20454	1	0.848	0.789	0.919	0.995	1.266	1.05	1.295	0.040145
P41250	204	K	Glycine--tRNA ligase OS=Homo sapiens OX=9606 GN=GARS1 PE=1 SV=3	GARS1	1	3.43667e-07	139.32	FADFMVK(1)DVK	2	-0.26143	2	1.558	1.562	1.548	0.646	0.618	0.632	0.406	1.3253e-07
P41250	207	K	Glycine--tRNA ligase OS=Homo sapiens OX=9606 GN=GARS1 PE=1 SV=3	GARS1	1	0.00098637	115.57	DVK(1)NGECFR	2	2.2355	3	1.609	1.537	1.451	0.648	0.625	0.673	0.423	1.99187e-05
P41250	99	K	Glycine--tRNA ligase OS=Homo sapiens OX=9606 GN=GARS1 PE=1 SV=3	GARS1	1	0.0286974	72.042	AVAELK(1)AR	2	1.3052	1	0.861	0.911	0.873	1.161	0.988	1.11	1.232	0.0154183
P41250	506	K	Glycine--tRNA ligase OS=Homo sapiens OX=9606 GN=GARS1 PE=1 SV=3	GARS1	1	0.00337868	106.04	GAIGK(1)AYK	2	0.33371	1	1.017	1.027	0.964	0.982	0.976	1.053	1.001	0.98122
P41250	219	K	Glycine--tRNA ligase OS=Homo sapiens OX=9606 GN=GARS1 PE=1 SV=3	GARS1	1	0.000210223	88.596	ADHLLK(1)AHLQK	4	-0.45564	1	1.112	1.258	1.186	0.91	0.871	0.861	0.743	0.00167969
P41250	477	K	Glycine--tRNA ligase OS=Homo sapiens OX=9606 GN=GARS1 PE=1 SV=3	GARS1	1	0.0180208	61.235	ATK(1)VPLVAEK	3	0.62649	2	1.075	1.031	1.053	0.975	0.974	0.964	0.922	0.0030181
P41250	490	K	Glycine--tRNA ligase OS=Homo sapiens OX=9606 GN=GARS1 PE=1 SV=3	GARS1	1	0.0003402	72.315	EPK(1)TVNVVQFEPSK	3	-0.94798	1
P41252	844	K	Isoleucine--tRNA ligase, cytoplasmic OS=Homo sapiens OX=9606 GN=IARS PE=1 SV=2	IARS	1	0.00515717	80.688	TIPIK(1)YPLK	3	-0.52454	2	1.131	0.908	1.078	0.964	0.984	0.994	0.944	0.5098
P41252	169	K	Isoleucine--tRNA ligase, cytoplasmic OS=Homo sapiens OX=9606 GN=IARS PE=1 SV=2	IARS	1	0.000556627	92.247	QLYDK(1)GLVYR	2	-0.62667	1	1.102	1.055	1.011	1.069	0.936	0.909	0.92	0.199977
P41567	42	K	Eukaryotic translation initiation factor 1 OS=Homo sapiens OX=9606 GN=EIF1 PE=1 SV=1	EIF1	1	7.53345e-06	99.055	K(1)TLTTVQGIADDYDK	3	0.07409	1	1.261	1.32	1.279	0.82	0.852	0.767	0.632	0.000162099
P41567	109	K	Eukaryotic translation initiation factor 1 OS=Homo sapiens OX=9606 GN=EIF1 PE=1 SV=1	EIF1	1	0.00992532	76.228	DDQLK(1)VHGF	2	0.68504	1	1.045	1.084	1.066	0.928	0.979	0.976	0.902	0.0071563
P41567	66	K	Eukaryotic translation initiation factor 1 OS=Homo sapiens OX=9606 GN=EIF1 PE=1 SV=1	EIF1	1	1.09098e-35	151	K(1)FACNGTVIEHPEYGEVIQLQGDQR	3	-0.068649	1	1.685	1.755	2.011	0.448	0.386	0.524	0.249	0.000176697
P42126	61	K	Enoyl-CoA delta isomerase 1, mitochondrial OS=Homo sapiens OX=9606 GN=ECI1 PE=1 SV=1	ECI1	1	0.000191062	61.444	VLVEPDAGAGVAVMK(1)FK	3	-4.2663	1
P42166	334	K	Lamina-associated polypeptide 2, isoform alpha OS=Homo sapiens OX=9606 GN=TMPO PE=1 SV=2	TMPO	1	8.27814e-07	118.08	EK(1)SGIQPLCPER	2	0.52641	2	1.459	1.358	1.508	0.711	0.683	0.732	0.492	4.1488e-05
P42166	17	K	Lamina-associated polypeptide 2, isoform alpha OS=Homo sapiens OX=9606 GN=TMPO PE=1 SV=2	TMPO	1	1.93226e-06	96.391	LK(1)SELVANNVTLPAGEQR	3	0.091781	1	0.906	0.892	0.801	1.041	1.144	1.102	1.265	0.0076817
P42166	665	K	Lamina-associated polypeptide 2, isoform alpha OS=Homo sapiens OX=9606 GN=TMPO PE=1 SV=2	TMPO	1	0.0111062	85.355	INLASK(1)NK	2	-0.43947	1	1.23	1.233	1.174	0.907	0.826	0.86	0.713	0.00042016
P42167	203	K	Lamina-associated polypeptide 2, isoforms beta/gamma OS=Homo sapiens OX=9606 GN=TMPO PE=1 SV=2	TMPO	1	0.0172734	69.825	REPLK(1)GR	3	0.048735	1
P42167	393	K	Lamina-associated polypeptide 2, isoforms beta/gamma OS=Homo sapiens OX=9606 GN=TMPO PE=1 SV=2	TMPO	1	0.000802858	73.435	YVPK(1)YVPLADVK	3	0.8665	1	0.732	0.692	0.843	1.067	1.277	1.16	1.546	0.0051008
P42224	152	K	Signal transducer and activator of transcription 1-alpha/beta OS=Homo sapiens OX=9606 GN=STAT1 PE=1 SV=2	STAT1	1	0.00351683	63.091	DK(1)VMCIEHEIK	3	-0.25958	1	1.219	1.385	1.319	0.803	0.829	0.762	0.61	0.00037983
P42224	413	K	Signal transducer and activator of transcription 1-alpha/beta OS=Homo sapiens OX=9606 GN=STAT1 PE=1 SV=2	STAT1	1	0.0111455	85.29	EQK(1)NAGTR	2	-0.93819	1	0.89	0.85	0.768	1.137	1.142	1.075	1.337	0.0036
P42285	796	K	Exosome RNA helicase MTR4 OS=Homo sapiens OX=9606 GN=MTREX PE=1 SV=3	MTREX	1	0.000393205	85.813	VIQK(1)VEAFEHR	3	0.29969	1	0.982	0.996	1.039	0.986	1.017	1.001	0.996	0.84066
[truncated: 2,959 more rows]

## Sheet: Peptide_quant
ID	Sequence	Length	Modifications	Modified sequence	Protein accession	Protein description	Charge	m/z	Mass error [ppm]	PEP	Score	MS/MS Count	MKN_45C1 intensity	MKN_45C2 intensity	MKN_45C3 intensity	MKN_45S1 intensity	MKN_45S2 intensity	MKN_45S3 intensity
0	AAAAAAALQAKSDEK	15	Acetyl (K)	_AAAAAAALQAK(ac)SDEK_	P36578	60S ribosomal protein L4 OS=Homo sapiens OX=9606 GN=RPL4 PE=1 SV=5	2	729.383	-3.6353	5.0561e-06	105.19	1	4004.6	4796.9	4600.6	9871.2	10170	9323.7
1	AAAAAAALQAKSDEK	15	Acetyl (K)	_AAAAAAALQAK(ac)SDEK_	P36578	60S ribosomal protein L4 OS=Homo sapiens OX=9606 GN=RPL4 PE=1 SV=5	3	486.591	-3.0315	6.4811e-06	97.69	1	3274.1	3225	3199	4683.6	5176.1	5167.7
2	AAAFEQLQKWK	11	Acetyl (K)	_AAAFEQLQK(ac)WK_	O94826	Mitochondrial import receptor subunit TOM70 OS=Homo sapiens OX=9606 GN=TOMM70 PE=1 SV=1	3	454.579	-0.13535	0.0033533	63.624	1	2008.6	2413.4	2344.3	3662.5	3512.7	3752.1
3	AAAGEFADDPCSSVKR	16	Acetyl (K)	_AAAGEFADDPCSSVK(ac)R_	P35221	Catenin alpha-1 OS=Homo sapiens OX=9606 GN=CTNNA1 PE=1 SV=1	2	861.891	-1.2191	5.502e-08	107.82	1	4360.1	4887.6	5335.7	3337	3315.8	3908.5
4	AAAHHYGAQCDKPNK	15	Acetyl (K)	_AAAHHYGAQCDK(ac)PNK_	P51970	NADH dehydrogenase [ubiquinone] 1 alpha subcomplex subunit 8 OS=Homo sapiens OX=9606 GN=NDUFA8 PE=1 SV=3	4	428.201	-0.7974	0.0060558	45.28	1	2104.6	2026.7	2018.3	377.17	559.42	550.18
5	AAAHHYGAQCDKPNK	15	Acetyl (K)	_AAAHHYGAQCDK(ac)PNK_	P51970	NADH dehydrogenase [ubiquinone] 1 alpha subcomplex subunit 8 OS=Homo sapiens OX=9606 GN=NDUFA8 PE=1 SV=3	4	428.201	-0.29054	0.0064727	44.511	1	2393.9	2217.3	2347.1	690.54	1028.8	1024.9
6	AAAHHYGAQCDKPNK	15	Acetyl (K)	_AAAHHYGAQCDK(ac)PNK_	P51970	NADH dehydrogenase [ubiquinone] 1 alpha subcomplex subunit 8 OS=Homo sapiens OX=9606 GN=NDUFA8 PE=1 SV=3	3	570.599	-2.1678	0.0017031	54.09	1	3796.7	4182.9	4539.4	1959	2014.4	1931
7	AAAKHLIER	9	Acetyl (K)	_AAAK(ac)HLIER_	Q05086	Ubiquitin-protein ligase E3A OS=Homo sapiens OX=9606 GN=UBE3A PE=1 SV=4	3	350.873	0.78252	0.0022005	77.662	1	1301.8	1807.7	1298.1	3520.2	3321.5	3267.1
8	AAAKNHAR	8	Acetyl (K)	_AAAK(ac)NHAR_	P31939	Bifunctional purine biosynthesis protein PURH OS=Homo sapiens OX=9606 GN=ATIC PE=1 SV=3	3	294.163	0.55706	1.9182e-08	147.34	1	1676.5	2213.6	2004.9	2677.3	2386.5	2744.4
9	AAAKNHAR	8	Acetyl (K)	_AAAK(ac)NHAR_	P31939	Bifunctional purine biosynthesis protein PURH OS=Homo sapiens OX=9606 GN=ATIC PE=1 SV=3	2	440.741	-0.31367	0.0021238	117.39	1	2896.9	3463.2	3097.8	4163.7	4204.8	4725
10	AAAKSAALQVTK	12	Acetyl (K)	_AAAK(ac)SAALQVTK_	Q92733	Proline-rich protein PRCC OS=Homo sapiens OX=9606 GN=PRCC PE=1 SV=1	2	600.851	-1.9728	1.7835e-10	143.93	1	5551.1	6042.3	6303	11019	11832	12504
11	AAAKSAALQVTK	12	Acetyl (K)	_AAAK(ac)SAALQVTK_	Q92733	Proline-rich protein PRCC OS=Homo sapiens OX=9606 GN=PRCC PE=1 SV=1	3	400.903	-0.30128	0.0024765	61.11	1	0	0	0	0	0	0
12	AAATPAKK	8	Acetyl (K)	_AAATPAK(ac)K_	P19338	Nucleolin OS=Homo sapiens OX=9606 GN=NCL PE=1 SV=3	2	400.237	-1.4908	0.022934	76.1	1	4963.7	5194.7	5556.6	5382.9	5686.4	7258
13	AACAEKLK	8	Acetyl (K)	_AACAEK(ac)LK_	Q9Y520	Protein PRRC2C OS=Homo sapiens OX=9606 GN=PRRC2C PE=1 SV=4	3	311.501	0.67381	0.011343	65.246	1	14044	15859	14985	10194	11052	11483
14	AACAEKLK	8	Acetyl (K)	_AACAEK(ac)LK_	Q9Y520	Protein PRRC2C OS=Homo sapiens OX=9606 GN=PRRC2C PE=1 SV=4	2	466.747	-1.0803	0.0077062	90.906	1	6973.5	6747.2	7235.2	4962.5	5183.2	5249.2
15	AADLKYIEACAR	12	Acetyl (K)	_AADLK(ac)YIEACAR_	O60701	UDP-glucose 6-dehydrogenase OS=Homo sapiens OX=9606 GN=UGDH PE=1 SV=1	3	474.906	0.34007	0.00098446	69.864	1	903.51	1180.1	964.29	1273.5	1237.8	1369.7
16	AADLKYIEACAR	12	Acetyl (K)	_AADLK(ac)YIEACAR_	O60701	UDP-glucose 6-dehydrogenase OS=Homo sapiens OX=9606 GN=UGDH PE=1 SV=1	2	711.856	-1.0015	0.0011916	84.753	1	3114.9	3411.9	3772	4134.7	5103.6	3954
17	AAEEAKSAIAK	11	Acetyl (K)	_AAEEAK(ac)SAIAK_	P35241	Radixin OS=Homo sapiens OX=9606 GN=RDX PE=1 SV=1	2	565.806	-1.0156	2.8578e-06	128.54	1	7333.9	7732.1	7400.8	15820	16536	16849
18	AAEEVEAKFK	10	Acetyl (K)	_AAEEVEAK(ac)FK_	Q9NX63	MICOS complex subunit MIC19 OS=Homo sapiens OX=9606 GN=CHCHD3 PE=1 SV=1	2	582.301	-1.2653	0.00035345	107.06	1	4190.8	4630.5	4998.7	12164	12647	12998
19	AAEEVEAKFK	10	Acetyl (K)	_AAEEVEAK(ac)FK_	Q9NX63	MICOS complex subunit MIC19 OS=Homo sapiens OX=9606 GN=CHCHD3 PE=1 SV=1	3	388.536	-0.21784	0.0034394	68.657	1	2492.4	2689.5	2223.1	3824.8	4284	4723.9
20	AAEPPPPKIPK	11	Acetyl (K)	_AAEPPPPK(ac)IPK_	O75909	Cyclin-K OS=Homo sapiens OX=9606 GN=CCNK PE=1 SV=2	3	396.233	1.2041	0.0059407	55.314	1	0	0	0	0	0	0
21	AAEQYTPKAK	10	Acetyl (K)	_AAEQYTPK(ac)AK_	P49327	Fatty acid synthase OS=Homo sapiens OX=9606 GN=FASN PE=1 SV=3	2	574.801	-1.6712	9.9261e-06	130.56	1	12304	12498	13048	12704	12007	13650
22	AAEQYTPKAK	10	Acetyl (K)	_AAEQYTPK(ac)AK_	P49327	Fatty acid synthase OS=Homo sapiens OX=9606 GN=FASN PE=1 SV=3	3	383.536	0.46803	0.020445	47.894	1	4585	5401.5	4516.6	5360.6	5173.5	6731.2
23	AAEVLNKHSLSGR	13	Acetyl (K)	_AAEVLNK(ac)HSLSGR_	P52272	Heterogeneous nuclear ribonucleoprotein M OS=Homo sapiens OX=9606 GN=HNRNPM PE=1 SV=3	3	475.26	0.75252	0.0049582	52.5	1	0	0	0	0	0	0
24	AAEVLNKHSLSGR	13	Acetyl (K)	_AAEVLNK(ac)HSLSGR_	P52272	Heterogeneous nuclear ribonucleoprotein M OS=Homo sapiens OX=9606 GN=HNRNPM PE=1 SV=3	2	712.386	-0.96597	0.00041024	91.076	1	5842.5	5554.8	5174.7	7366.3	8398.2	9435.9
25	AAFKEPK	7	Acetyl (K)	_AAFK(ac)EPK_	Q03111	Protein ENL OS=Homo sapiens OX=9606 GN=MLLT1 PE=1 SV=2	3	278.157	-0.31145	0.0068403	81.297	1	25365	24761	25034	20426	19994	21321
26	AAGAGAAKR	9	Acetyl (K)	_AAGAGAAK(ac)R_	P16401	Histone H1.5 OS=Homo sapiens OX=9606 GN=H1-5 PE=1 SV=3	2	407.73	-1.0737	0.034079	60.91	1	2306.4	2578.8	2569.8	3016.7	2791.4	2780.2
27	AAGAGKVTKSAQKAQK	16	3 Acetyl (K)	_AAGAGK(ac)VTK(ac)SAQK(ac)AQK_	Q5VTE0	Putative elongation factor 1-alpha-like 3 OS=Homo sapiens OX=9606 GN=EEF1A1P5 PE=5 SV=1	3	557.313	-1.5455	8.8071e-07	101.2	1	5058.3	6494.6	5982.7	9278.1	8091.5	9908.3
28	AAGDGGSGPPEKK	13	Acetyl (K)	_AAGDGGSGPPEK(ac)K_	O75150	E3 ubiquitin-protein ligase BRE1B OS=Homo sapiens OX=9606 GN=RNF40 PE=1 SV=5	2	606.796	-1.925	0.0018534	71.879	1	3897.9	3600.6	3837.2	3539.2	3901.6	3315.3
29	AAGDGGSGPPEKK	13	Acetyl (K)	_AAGDGGSGPPEK(ac)K_	O75150	E3 ubiquitin-protein ligase BRE1B OS=Homo sapiens OX=9606 GN=RNF40 PE=1 SV=5	3	404.867	0.0098813	0.00045264	78.324	1	2577.3	3184.3	2533.4	2726	2447.2	2809.1
30	AALEALGSCLNNKYSEGYPGK	21	Acetyl (K)	_AALEALGSCLNNK(ac)YSEGYPGK_	P34897	Serine hydroxymethyltransferase, mitochondrial OS=Homo sapiens OX=9606 GN=SHMT2 PE=1 SV=3	4	571.778	0.293	7.1698e-08	68.952	1	7736.6	8253.8	8904.2	6068.3	6689.2	7470.6
33	AALNELLKHIK	11	Acetyl (K)	_AALNELLK(ac)HIK_	Q6PGP7	Tetratricopeptide repeat protein 37 OS=Homo sapiens OX=9606 GN=TTC37 PE=1 SV=1	3	431.263		2.1296e-06	87.184	1	0	0	0	0	0	0
34	AALQELLSKGLIK	13	Acetyl (K)	_AALQELLSK(ac)GLIK_	P62851	40S ribosomal protein S25 OS=Homo sapiens OX=9606 GN=RPS25 PE=1 SV=1	3	475.961		3.7943e-05	66.004	1	0	0	0	0	0	0
35	AAMKGLGK	8	Acetyl (K)	_AAMK(ac)GLGK_	Q5VV41	Rho guanine nucleotide exchange factor 16 OS=Homo sapiens OX=9606 GN=ARHGEF16 PE=1 SV=1	2	409.234	-1.047	0.0084459	89.698	1	0	0	0	0	0	0
36	AANDAGYFNDEMAPIEVKTK	20	Acetyl (K)	_AANDAGYFNDEMAPIEVK(ac)TK_	P42765	3-ketoacyl-CoA thiolase, mitochondrial OS=Homo sapiens OX=9606 GN=ACAA2 PE=1 SV=2	3	742.684	-1.0047	2.8633e-05	61.963	1	5231.7	6424.8	5436.3	7309.3	7696	8171.5
44	AAPEAKK	7	Acetyl (K)	_AAPEAK(ac)K_	P19338	Nucleolin OS=Homo sapiens OX=9606 GN=NCL PE=1 SV=3	2	378.716	-0.52978	0.042482	75.109	1	2758.4	3275.5	2853.1	4788.4	4722.5	4729.8
45	AAPGAEFAPNKR	12	Acetyl (K)	_AAPGAEFAPNK(ac)R_	Q15233	Non-POU domain-containing octamer-binding protein OS=Homo sapiens OX=9606 GN=NONO PE=1 SV=4	2	635.831	-1.6273	2.4507e-06	111.94	1	4799.9	5821.3	5390.8	8581.7	9123.3	9561.6
46	AAQASDLEKIHLDEK	15	Acetyl (K)	_AAQASDLEK(ac)IHLDEK_	P37837	Transaldolase OS=Homo sapiens OX=9606 GN=TALDO1 PE=1 SV=2	3	570.628	0.24691	8.7453e-05	89.358	1	6183	5818.4	6018.8	11229	12524	13563
47	AAQEEYVKR	9	Acetyl (K)	_AAQEEYVK(ac)R_	P04075	Fructose-bisphosphate aldolase A OS=Homo sapiens OX=9606 GN=ALDOA PE=1 SV=2	2	568.291	-1.767	0.0012904	110.84	1	7251.8	6937.4	6954.6	5455.8	6337.6	6589.9
48	AAQEEYVKR	9	Acetyl (K)	_AAQEEYVK(ac)R_	P04075	Fructose-bisphosphate aldolase A OS=Homo sapiens OX=9606 GN=ALDOA PE=1 SV=2	2	568.291	-1.4317	0.0013155	110.39	3	12611	13124	12942	11722	12593	12066
49	AAQEEYVKR	9	Acetyl (K)	_AAQEEYVK(ac)R_	P04075	Fructose-bisphosphate aldolase A OS=Homo sapiens OX=9606 GN=ALDOA PE=1 SV=2	3	379.196	-0.27516	3.0867e-06	143.03	1	3727.5	3603	3836.8	4678.5	5229.9	4667.5
50	AAQEEYVKR	9	Acetyl (K)	_AAQEEYVK(ac)R_	P04075	Fructose-bisphosphate aldolase A OS=Homo sapiens OX=9606 GN=ALDOA PE=1 SV=2	2	568.291	-1.9677	3.8418e-05	133.75	1	7518.9	9288.1	8024.3	8598	9094.4	8724.5
51	AAQKYVER	8	Acetyl (K)	_AAQK(ac)YVER_	P30519	Heme oxygenase 2 OS=Homo sapiens OX=9606 GN=HMOX2 PE=1 SV=2	2	503.769	-1.8754	0.017062	79.128	1	12753	14893	14064	9123.5	12603	9874.2
52	AAQLGFKTVCIEK	13	Acetyl (K)	_AAQLGFK(ac)TVCIEK_	P09622	Dihydrolipoyl dehydrogenase, mitochondrial OS=Homo sapiens OX=9606 GN=DLD PE=1 SV=2	3	502.938	-1.0338	2.4366e-05	101.53	1	3398.3	3932.5	3478.4	2525	2660.2	2799.4
53	AAQLGFKTVCIEK	13	Acetyl (K)	_AAQLGFK(ac)TVCIEK_	P09622	Dihydrolipoyl dehydrogenase, mitochondrial OS=Homo sapiens OX=9606 GN=DLD PE=1 SV=2	2	753.903	-1.2134	6.8458e-17	148.57	1	12830	13290	14012	8461.4	7845.9	7918.2
54	AAQPGSGKGK	10	Acetyl (K)	_AAQPGSGK(ac)GK_	P05455	Lupus La protein OS=Homo sapiens OX=9606 GN=SSB PE=1 SV=2	2	471.754	-2.2198	0.00022499	94.767	1	5737.9	6442.2	6036.9	9280.3	10716	9897.9
55	AASGEAKPK	9	Acetyl (K)	_AASGEAK(ac)PK_	P16401	Histone H1.5 OS=Homo sapiens OX=9606 GN=H1-5 PE=1 SV=3	2	450.743	-2.0701	0.0043026	82.417	1	6003.5	5414.5	5935.9	10646	10331	10516
56	AASGYPVKVPLEVQEADEAK	20	Acetyl (K)	_AASGYPVK(ac)VPLEVQEADEAK_	P26640	Valine--tRNA ligase OS=Homo sapiens OX=9606 GN=VARS PE=1 SV=4	3	715.035	-1.2011	1.0783e-06	82.609	1	8192.6	8569.7	8897.1	12091	13036	14777
57	AASVPKVETVK	11	Acetyl (K)	_AASVPK(ac)VETVK_	P55010	Eukaryotic translation initiation factor 5 OS=Homo sapiens OX=9606 GN=EIF5 PE=1 SV=2	2	585.84	-0.96099	3.8132e-06	127.02	1	8880.3	9744.3	9355.8	16002	17025	16921
58	AATSDLEHYDKTR	13	Acetyl (K)	_AATSDLEHYDK(ac)TR_	P80303	Nucleobindin-2 OS=Homo sapiens OX=9606 GN=NUCB2 PE=1 SV=3	3	516.914	-0.82084	0.009147	48.527	1	0	0	0	0	0	0
59	AAVEQEKR	8	Acetyl (K)	_AAVEQEK(ac)R_	Q15075	Early endosome antigen 1 OS=Homo sapiens OX=9606 GN=EEA1 PE=1 SV=2	2	486.759	-0.94994	0.030602	71.614	1	3920.9	4749.6	5810.4	9194.1	10221	8303.1
60	AAVHLEGKIEQAQR	14	Acetyl (K)	_AAVHLEGK(ac)IEQAQR_	P18206	Vinculin OS=Homo sapiens OX=9606 GN=VCL PE=1 SV=4	3	531.29	-0.41549	1.0701e-07	112.42	1	2451.2	2684.3	2310.3	3024.2	3053	3148.5
61	AAVIKHR	7	Acetyl (K)	_AAVIK(ac)HR_	Q96S44	EKC/KEOPS complex subunit TP53RK OS=Homo sapiens OX=9606 GN=TP53RK PE=1 SV=2	3	279.508	-0.063896	0.017495	65.672	1	0	0	0	0	0	0
62	AAVKGYLGPEQLPDCLK	17	Acetyl (K)	_AAVK(ac)GYLGPEQLPDCLK_	P40926	Malate dehydrogenase, mitochondrial OS=Homo sapiens OX=9606 GN=MDH2 PE=1 SV=3	3	634.333	-1.0397	0.00010613	82.59	1	6069.9	6155.9	6447.9	7646.8	7564.4	7873.2
63	AAVPSIKFCLDNGAK	15	Acetyl (K)	_AAVPSIK(ac)FCLDNGAK_	P00558	Phosphoglycerate kinase 1 OS=Homo sapiens OX=9606 GN=PGK1 PE=1 SV=3	3	544.952	-0.20382	1.5282e-22	153.39	1	9251.8	9553.6	10638	10547	13046	11346
64	AAVPSIKFCLDNGAK	15	Acetyl (K)	_AAVPSIK(ac)FCLDNGAK_	P00558	Phosphoglycerate kinase 1 OS=Homo sapiens OX=9606 GN=PGK1 PE=1 SV=3	3	544.952	-0.93927	3.3067e-08	107.46	1	9825.8	10420	10684	11947	12602	12554
65	AAVPSIKFCLDNGAK	15	Acetyl (K)	_AAVPSIK(ac)FCLDNGAK_	P00558	Phosphoglycerate kinase 1 OS=Homo sapiens OX=9606 GN=PGK1 PE=1 SV=3	2	816.924	-1.1001	0.00044066	87.647	1	3944.4	4827.3	4663.2	4635.6	4980.1	4437.3
68	AAVVKFHPIQGHR	13	Acetyl (K)	_AAVVK(ac)FHPIQGHR_	Q13151	Heterogeneous nuclear ribonucleoprotein A0 OS=Homo sapiens OX=9606 GN=HNRNPA0 PE=1 SV=1	4	376.215	1.1262	5.2239e-05	93.345	1	957.49	720.34	806.58	1050.6	940.56	1121.9
70	ACAAQTKATFLK	12	Acetyl (K)	_ACAAQTK(ac)ATFLK_	P17980	26S proteasome regulatory subunit 6A OS=Homo sapiens OX=9606 GN=PSMC3 PE=1 SV=3	3	451.239	-1.2867	0.0030552	58.172	1	4951.4	5095.1	4741.3	4398.3	4829.6	5154.7
71	ACAAQTKATFLK	12	Acetyl (K)	_ACAAQTK(ac)ATFLK_	P17980	26S proteasome regulatory subunit 6A OS=Homo sapiens OX=9606 GN=PSMC3 PE=1 SV=3	2	676.356	-1.8469	1.931e-13	150.11	1	13558	14220	15458	6627.1	7282.6	7111.5
73	ACFYNLDKFR	10	Acetyl (K)	_ACFYNLDK(ac)FR_	Q96I25	Splicing factor 45 OS=Homo sapiens OX=9606 GN=RBM17 PE=1 SV=1	2	688.327		0.0038293	58.511	1	0	0	0	0	0	0
74	ACGKFEISAIR	11	Acetyl (K)	_ACGK(ac)FEISAIR_	Q96G03	Phosphoglucomutase-2 OS=Homo sapiens OX=9606 GN=PGM2 PE=1 SV=4	2	647.335	-1.1309	0.0012154	87.641	1	4700.7	4608	4749.6	4427.3	4621.4	5092.7
75	ACKNCTCGLAEELEK	15	Acetyl (K)	_ACK(ac)NCTCGLAEELEK_	Q6FI81	Anamorsin OS=Homo sapiens OX=9606 GN=CIAPIN1 PE=1 SV=2	3	608.936	-1.7194	0.00039853	64.588	1	11047	11206	11957	11114	12443	12737
76	ACLDTAVENMPSLKMK	16	Acetyl (K),Oxidation (M)	_ACLDTAVENMPSLK(ac)M(ox)K_	P49327	Fatty acid synthase OS=Homo sapiens OX=9606 GN=FASN PE=1 SV=3	3	622.632	-1.1113	0.00015477	71.08	1	7795.4	7843.9	8324.3	15174	15866	16460
77	ACLDTAVENMPSLKMK	16	Acetyl (K)	_ACLDTAVENMPSLK(ac)MK_	P49327	Fatty acid synthase OS=Homo sapiens OX=9606 GN=FASN PE=1 SV=3	3	617.3	-0.74111	8.9133e-09	112.17	1	12162	13890	13208	15244	15742	15381
78	ACLKYPEWK	9	Acetyl (K)	_ACLK(ac)YPEWK_	Q9Y365	START domain-containing protein 10 OS=Homo sapiens OX=9606 GN=STARD10 PE=1 SV=2	2	618.808	-2.074	0.0014322	104.22	1	19289	21682	20568	13111	13624	13303
79	ACLKYPEWK	9	Acetyl (K)	_ACLK(ac)YPEWK_	Q9Y365	START domain-containing protein 10 OS=Homo sapiens OX=9606 GN=STARD10 PE=1 SV=2	3	412.874	-0.30545	0.0026486	76.064	1	3953.9	4489.6	4353.1	3476.1	3620.6	3309.7
80	ACNSHKLR	8	Acetyl (K)	_ACNSHK(ac)LR_	Q7Z2T5	TRMT1-like protein OS=Homo sapiens OX=9606 GN=TRMT1L PE=1 SV=2	3	343.175	-0.21757	0.0057254	76.221	1	2830.3	2871.5	2920.4	5367	5339.6	5564.2
81	ACPEKHFAFK	10	Acetyl (K)	_ACPEK(ac)HFAFK_	Q92520	Protein FAM3C OS=Homo sapiens OX=9606 GN=FAM3C PE=1 SV=1	3	426.21	-0.96142	0.0054013	63.694	1	0	0	0	0	0	0
82	ACTYKGHK	8	Acetyl (K)	_ACTYK(ac)GHK_	Q14435	Polypeptide N-acetylgalactosaminyltransferase 3 OS=Homo sapiens OX=9606 GN=GALNT3 PE=1 SV=2	3	336.164	-0.16096	0.0043249	79.474	1	3790.4	3562.3	4718	3441.2	3714	3716.2
83	ACTYKGHK	8	Acetyl (K)	_ACTYK(ac)GHK_	Q14435	Polypeptide N-acetylgalactosaminyltransferase 3 OS=Homo sapiens OX=9606 GN=GALNT3 PE=1 SV=2	3	336.164	-0.57295	0.01483	60.436	1	2871.8	2885.6	2817.7	2482.5	2769.1	2962.5
84	ACYDEGKR	8	Acetyl (K)	_ACYDEGK(ac)R_	Q8NBZ7	UDP-glucuronic acid decarboxylase 1 OS=Homo sapiens OX=9606 GN=UXS1 PE=1 SV=1	2	520.727	-0.64531	0.022071	76.605	1	9120	9564.7	9452.1	4794.4	5317.7	5303.3
85	ADAISKSELTK	11	Acetyl (K)	_ADAISK(ac)SELTK_	Q14141	Septin-6 OS=Homo sapiens OX=9606 GN=SEPTIN6 PE=1 SV=4	2	602.825	-1.5186	0.00012274	101.32	1	5796.3	6626.3	6238.9	9591.1	9768.3	9599.7
86	ADDGRPFPQVIKSK	14	Acetyl (K)	_ADDGRPFPQVIK(ac)SK_	P04075	Fructose-bisphosphate aldolase A OS=Homo sapiens OX=9606 GN=ALDOA PE=1 SV=2	3	533.954	-0.98792	2.1423e-05	97.291	2	19305	22230	21026	25363	26906	27654
87	ADDGRPFPQVIKSK	14	Acetyl (K)	_ADDGRPFPQVIK(ac)SK_	P04075	Fructose-bisphosphate aldolase A OS=Homo sapiens OX=9606 GN=ALDOA PE=1 SV=2	4	400.718	0.39997	1.4949e-05	100.11	2	11834	12661	12622	14348	15785	15068
88	ADDGRPFPQVIKSK	14	Acetyl (K)	_ADDGRPFPQVIK(ac)SK_	P04075	Fructose-bisphosphate aldolase A OS=Homo sapiens OX=9606 GN=ALDOA PE=1 SV=2	2	800.428	-0.64373	0.0067286	62.861	1	4184.2	4905.7	4668.7	5941.2	7024	5514.8
89	ADDGRPFPQVIKSK	14	Acetyl (K)	_ADDGRPFPQVIK(ac)SK_	P04075	Fructose-bisphosphate aldolase A OS=Homo sapiens OX=9606 GN=ALDOA PE=1 SV=2	3	533.954	-1.7053	0.00026149	83.54	1	7071.7	8116.7	7958.8	12046	11308	11883
90	ADDGRPFPQVIKSK	14	Acetyl (K),Deamidation (NQ)	_ADDGRPFPQ(de)VIK(ac)SK_	P04075	Fructose-bisphosphate aldolase A OS=Homo sapiens OX=9606 GN=ALDOA PE=1 SV=2	3	534.283	-0.76739	0.0015525	61.649	1	11032	11564	11120	16321	18047	18322
96	ADGKISEQSDAK	12	Acetyl (K)	_ADGK(ac)ISEQSDAK_	P25705	ATP synthase subunit alpha, mitochondrial OS=Homo sapiens OX=9606 GN=ATP5F1A PE=1 SV=1	3	430.877	-1.2017	0.00025748	86.803	1	2433.7	3272.5	2774.5	3036.6	3386.8	3453.9
97	ADGKISEQSDAK	12	Acetyl (K)	_ADGK(ac)ISEQSDAK_	P25705	ATP synthase subunit alpha, mitochondrial OS=Homo sapiens OX=9606 GN=ATP5F1A PE=1 SV=1	2	645.812	-2.1334	1.9919e-06	113.4	1	11111	11458	12336	12548	12982	13933
98	ADGYNQPDSKR	11	Acetyl (K)	_ADGYNQPDSK(ac)R_	O60506	Heterogeneous nuclear ribonucleoprotein Q OS=Homo sapiens OX=9606 GN=SYNCRIP PE=1 SV=2	2	646.797	-2.4454	0.0014056	86.772	1	1511.7	1695.8	1472.3	2938.7	3203.2	3572.2
99	ADGYNQPDSKR	11	Acetyl (K)	_ADGYNQPDSK(ac)R_	O60506	Heterogeneous nuclear ribonucleoprotein Q OS=Homo sapiens OX=9606 GN=SYNCRIP PE=1 SV=2	2	646.797	-0.78069	0.00021668	94.122	1	2437.6	3062.8	2716.3	5569.1	5876.3	6800.1
100	ADHGEPIGR	9	Unmodified	_ADHGEPIGR_	P08238	Heat shock protein HSP 90-beta OS=Homo sapiens OX=9606 GN=HSP90AB1 PE=1 SV=4	3	317.826	-0.56741	0.0079076	88.177	1	1183.3	1081.3	1046	1371.1	1518.9	1600.1
101	ADHLLKAHLQK	11	Acetyl (K)	_ADHLLK(ac)AHLQK_	P41250	Glycine--tRNA ligase OS=Homo sapiens OX=9606 GN=GARS1 PE=1 SV=3	4	329.692	0.78607	0.00021022	88.596	1	2184.8	2666.7	2518.4	2671.6	2696.5	2744.6
102	ADILEDKDGK	10	Acetyl (K)	_ADILEDK(ac)DGK_	P52272	Heterogeneous nuclear ribonucleoprotein M OS=Homo sapiens OX=9606 GN=HNRNPM PE=1 SV=3	3	382.528	0.070987	0.010516	54.259	1	3952.9	4117.3	3914.3	4924.4	5674.4	5632.8
103	ADILEDKDGKSR	12	Acetyl (K)	_ADILEDKDGK(ac)SR_	P52272	Heterogeneous nuclear ribonucleoprotein M OS=Homo sapiens OX=9606 GN=HNRNPM PE=1 SV=3	3	463.572	-0.82912	0.012169	50.592	1	4139.2	4819.5	4579.8	7195.9	7639.9	8056.2
104	ADINTKWAATR	11	Acetyl (K)	_ADINTK(ac)WAATR_	P50914	60S ribosomal protein L14 OS=Homo sapiens OX=9606 GN=RPL14 PE=1 SV=4	2	644.836	-0.75856	5.4696e-06	124.38	1	5563	4908.1	5883.8	9097.7	9443.6	9527.2
105	ADINTKWAATR	11	Acetyl (K)	_ADINTK(ac)WAATR_	P50914	60S ribosomal protein L14 OS=Homo sapiens OX=9606 GN=RPL14 PE=1 SV=4	3	430.226	0.15457	0.0011499	75.739	1	2226.4	2611.6	2740.2	4239.9	4576.5	4485.5
106	ADIPKFCHGILTK	13	Acetyl (K)	_ADIPK(ac)FCHGILTK_	Q92896	Golgi apparatus protein 1 OS=Homo sapiens OX=9606 GN=GLG1 PE=1 SV=2	3	514.61	-0.50202	0.00016509	87.647	1	16106	16628	16889	16393	17831	18126
107	ADKDYHFK	8	Acetyl (K)	_ADK(ac)DYHFK_	P06748	Nucleophosmin OS=Homo sapiens OX=9606 GN=NPM1 PE=1 SV=2	3	355.838	-1.5358	0.02336	52.579	1	2631.3	2683.7	2946.5	3061.7	3549.8	3552.8
[truncated: 7,292 more rows]

## Sheet: Statistics
		Number of modification sites per protein	Number of proteins
[truncated: 23 more rows]
