# Supplementary material for: Differential expression of lysine acetylation proteins in gastric cancer treated with a new antitumor agent bioactive peptide chelate selenium
Source: PeerJ. 2023 Jan 17;11:e14384. doi: 10.7717/peerj.14384 (PMC9854375; doi:10.7717/peerj.14384)
Supplement: Table S1 [file peerj-11-14384-s001.xlsx]

## Sheet: Diff distribution
Compared sample name	Type	Up-regulated	Down-regulated
MKN_45S/MKN_45C	Sites	297	665
	Proteins	238	499

## Sheet: MKN_45SvsMKN_45C
Protein accession	Position	MKN_45S/MKN_45C Ratio	Regulated Type	MKN_45S/MKN_45C P value	Amino acid	Protein description	Gene name	Localization probability	PEP	Score	Modified sequence	Charge	Mass error [ppm]	MS/MS Count	MKN_45C1	MKN_45C2	MKN_45C3	MKN_45S1	MKN_45S2	MKN_45S3	Subcellular localization	Biological Process	Cellular Component	Molecular Function	KEGG KO No.	KEGG Gene	KEGG pathway	IPR ID	Domain description
Q9UBE0	32	1.782	Up	0.00021626	K	SUMO-activating enzyme subunit 1 OS=Homo sapiens OX=9606 GN=SAE1 PE=1 SV=1	SAE1	1	0.0171974	70.056	LWGLEAQK(1)R	2	1.3447	1	0.634	0.717	0.701	1.245	1.252	1.16	cytoplasm	GO:0050794 regulation of cellular process; GO:0016925 protein sumoylation; GO:1903955 positive regulation of protein targeting to mitochondrion; GO:0090316 positive regulation of intracellular protein transport; GO:1903829 positive regulation of cellular protein localization; GO:1903533 regulation of protein targeting; GO:0044267 cellular protein metabolic process; GO:0010821 regulation of mitoch…	GO:0043229 intracellular organelle; GO:0044446 intracellular organelle part; GO:0032991 macromolecular complex; GO:0031981 nuclear lumen; GO:0044424 intracellular part; GO:0005623 cell; GO:0044422 organelle part; GO:0043231 intracellular membrane-bounded organelle; GO:0043226 organelle; GO:0031974 membrane-enclosed lumen; GO:1902494 catalytic complex; GO:0005634 nucleus; GO:0005654 nucleoplasm; G…	GO:0008641 small protein activating enzyme activity; GO:0030234 enzyme regulator activity; GO:0046982 protein heterodimerization activity; GO:0043008 ATP-dependent protein binding; GO:0003824 catalytic activity; GO:0005488 binding; GO:0004839 ubiquitin activating enzyme activity; GO:0046983 protein dimerization activity; GO:0016874 ligase activity; GO:0008022 protein C-terminus binding; GO:001687…	K10684	UBLE1A, SAE1; ubiquitin-like 1-activating enzyme E1 A [EC:6.2.1.45]	hsa04120 Ubiquitin mediated proteolysis	IPR000594; IPR016040;	THIF-type NAD/FAD binding fold; NAD(P)-binding domain;
Q9UBE0	210	0.554	Down	7.6738e-05	K	SUMO-activating enzyme subunit 1 OS=Homo sapiens OX=9606 GN=SAE1 PE=1 SV=1	SAE1	1	0.0101033	87.639	K(1)VVFCPVK	2	0.96958	1	1.357	1.417	1.328	0.714	0.782	0.778	cytoplasm	GO:0050794 regulation of cellular process; GO:0016925 protein sumoylation; GO:1903955 positive regulation of protein targeting to mitochondrion; GO:0090316 positive regulation of intracellular protein transport; GO:1903829 positive regulation of cellular protein localization; GO:1903533 regulation of protein targeting; GO:0044267 cellular protein metabolic process; GO:0010821 regulation of mitoch…	GO:0043229 intracellular organelle; GO:0044446 intracellular organelle part; GO:0032991 macromolecular complex; GO:0031981 nuclear lumen; GO:0044424 intracellular part; GO:0005623 cell; GO:0044422 organelle part; GO:0043231 intracellular membrane-bounded organelle; GO:0043226 organelle; GO:0031974 membrane-enclosed lumen; GO:1902494 catalytic complex; GO:0005634 nucleus; GO:0005654 nucleoplasm; G…	GO:0008641 small protein activating enzyme activity; GO:0030234 enzyme regulator activity; GO:0046982 protein heterodimerization activity; GO:0043008 ATP-dependent protein binding; GO:0003824 catalytic activity; GO:0005488 binding; GO:0004839 ubiquitin activating enzyme activity; GO:0046983 protein dimerization activity; GO:0016874 ligase activity; GO:0008022 protein C-terminus binding; GO:001687…	K10684	UBLE1A, SAE1; ubiquitin-like 1-activating enzyme E1 A [EC:6.2.1.45]	hsa04120 Ubiquitin mediated proteolysis	IPR000594; IPR016040;	THIF-type NAD/FAD binding fold; NAD(P)-binding domain;
Q9UBE0	141	0.541	Down	7.8869e-05	K	SUMO-activating enzyme subunit 1 OS=Homo sapiens OX=9606 GN=SAE1 PE=1 SV=1	SAE1	1	0.000322902	84.365	DVIVK(1)VDQICHK	3	1.4358	1	1.404	1.434	1.314	0.786	0.742	0.719	cytoplasm	GO:0050794 regulation of cellular process; GO:0016925 protein sumoylation; GO:1903955 positive regulation of protein targeting to mitochondrion; GO:0090316 positive regulation of intracellular protein transport; GO:1903829 positive regulation of cellular protein localization; GO:1903533 regulation of protein targeting; GO:0044267 cellular protein metabolic process; GO:0010821 regulation of mitoch…	GO:0043229 intracellular organelle; GO:0044446 intracellular organelle part; GO:0032991 macromolecular complex; GO:0031981 nuclear lumen; GO:0044424 intracellular part; GO:0005623 cell; GO:0044422 organelle part; GO:0043231 intracellular membrane-bounded organelle; GO:0043226 organelle; GO:0031974 membrane-enclosed lumen; GO:1902494 catalytic complex; GO:0005634 nucleus; GO:0005654 nucleoplasm; G…	GO:0008641 small protein activating enzyme activity; GO:0030234 enzyme regulator activity; GO:0046982 protein heterodimerization activity; GO:0043008 ATP-dependent protein binding; GO:0003824 catalytic activity; GO:0005488 binding; GO:0004839 ubiquitin activating enzyme activity; GO:0046983 protein dimerization activity; GO:0016874 ligase activity; GO:0008022 protein C-terminus binding; GO:001687…	K10684	UBLE1A, SAE1; ubiquitin-like 1-activating enzyme E1 A [EC:6.2.1.45]	hsa04120 Ubiquitin mediated proteolysis	IPR000594; IPR016040;	THIF-type NAD/FAD binding fold; NAD(P)-binding domain;
Q9UBE0	148	0.414	Down	0.00043594	K	SUMO-activating enzyme subunit 1 OS=Homo sapiens OX=9606 GN=SAE1 PE=1 SV=1	SAE1	1	0.00382454	62.088	VDQICHK(1)NSIK	3	0.26612	1	1.488	1.47	1.678	0.727	0.623	0.57	cytoplasm	GO:0050794 regulation of cellular process; GO:0016925 protein sumoylation; GO:1903955 positive regulation of protein targeting to mitochondrion; GO:0090316 positive regulation of intracellular protein transport; GO:1903829 positive regulation of cellular protein localization; GO:1903533 regulation of protein targeting; GO:0044267 cellular protein metabolic process; GO:0010821 regulation of mitoch…	GO:0043229 intracellular organelle; GO:0044446 intracellular organelle part; GO:0032991 macromolecular complex; GO:0031981 nuclear lumen; GO:0044424 intracellular part; GO:0005623 cell; GO:0044422 organelle part; GO:0043231 intracellular membrane-bounded organelle; GO:0043226 organelle; GO:0031974 membrane-enclosed lumen; GO:1902494 catalytic complex; GO:0005634 nucleus; GO:0005654 nucleoplasm; G…	GO:0008641 small protein activating enzyme activity; GO:0030234 enzyme regulator activity; GO:0046982 protein heterodimerization activity; GO:0043008 ATP-dependent protein binding; GO:0003824 catalytic activity; GO:0005488 binding; GO:0004839 ubiquitin activating enzyme activity; GO:0046983 protein dimerization activity; GO:0016874 ligase activity; GO:0008022 protein C-terminus binding; GO:001687…	K10684	UBLE1A, SAE1; ubiquitin-like 1-activating enzyme E1 A [EC:6.2.1.45]	hsa04120 Ubiquitin mediated proteolysis	IPR000594; IPR016040;	THIF-type NAD/FAD binding fold; NAD(P)-binding domain;
P09651	105	1.515	Up	0.0038216	K	Heterogeneous nuclear ribonucleoprotein A1 OS=Homo sapiens OX=9606 GN=HNRNPA1 PE=1 SV=5	HNRNPA1	1	0.000353752	77.776	EDSQRPGAHLTVK(1)K	3	-0.32852	2	0.768	0.733	0.803	1.186	1.276	1.029	nucleus	GO:0044700 single organism signaling; GO:0050658 RNA transport; GO:0065008 regulation of biological quality; GO:0007166 cell surface receptor signaling pathway; GO:0009891 positive regulation of biosynthetic process; GO:0051169 nuclear transport; GO:0046685 response to arsenic-containing substance; GO:0044237 cellular metabolic process; GO:0032204 regulation of telomere maintenance; GO:1903936 ce…	GO:0043229 intracellular organelle; GO:0016020 membrane; GO:0044421 extracellular region part; GO:0031982 vesicle; GO:0044446 intracellular organelle part; GO:0005737 cytoplasm; GO:0031981 nuclear lumen; GO:0032991 macromolecular complex; GO:0044424 intracellular part; GO:0005681 spliceosomal complex; GO:0005623 cell; GO:0005576 extracellular region; GO:0044422 organelle part; GO:0031974 membrane…	GO:0003677 DNA binding; GO:0003723 RNA binding; GO:1901265 nucleoside phosphate binding; GO:0098847 sequence-specific single stranded DNA binding; GO:0042162 telomeric DNA binding; GO:0003697 single-stranded DNA binding; GO:0005515 protein binding; GO:0000166 nucleotide binding; GO:0043565 sequence-specific DNA binding; GO:0043047 single-stranded telomeric DNA binding; GO:0003727 single-stranded …	K12741	HNRNPA1_3; heterogeneous nuclear ribonucleoprotein A1/A3	hsa03040 Spliceosome	IPR000504; IPR012677;	RNA recognition motif domain; Nucleotide-binding alpha-beta plait domain;
Q8IX12	558	1.66	Up	0.0059585	K	Cell division cycle and apoptosis regulator protein 1 OS=Homo sapiens OX=9606 GN=CCAR1 PE=1 SV=2	CCAR1	1	0.000272495	89.9	YHRPEETHK(1)GR	3	-1.1911	2	0.705	0.609	0.846	1.238	1.172	1.176	mitochondria	GO:0030335 positive regulation of cell migration; GO:0097659 nucleic acid-templated transcription; GO:0040017 positive regulation of locomotion; GO:0044699 single-organism process; GO:0009058 biosynthetic process; GO:0051253 negative regulation of RNA metabolic process; GO:0044237 cellular metabolic process; GO:2001141 regulation of RNA biosynthetic process; GO:0008152 metabolic process; GO:00328…	GO:0043229 intracellular organelle; GO:0044446 intracellular organelle part; GO:0005737 cytoplasm; GO:0031981 nuclear lumen; GO:0044424 intracellular part; GO:0005623 cell; GO:0044422 organelle part; GO:0043226 organelle; GO:0043231 intracellular membrane-bounded organelle; GO:0031974 membrane-enclosed lumen; GO:0005654 nucleoplasm; GO:0005634 nucleus; GO:0070013 intracellular organelle lumen; GO…	GO:0003677 DNA binding; GO:0003723 RNA binding; GO:0003714 transcription corepressor activity; GO:0005515 protein binding; GO:0003712 transcription cofactor activity; GO:0001047 core promoter binding; GO:1901363 heterocyclic compound binding; GO:0097159 organic cyclic compound binding; GO:0000975 regulatory region DNA binding; GO:0001067 regulatory region nucleic acid binding; GO:0030374 ligand-d…				IPR003034; IPR012340; IPR011992; IPR025223; IPR025954;	SAP domain; Nucleic acid-binding, OB-fold; EF-hand domain pair; S1-like RNA binding domain; DBC1/CARP1 catalytically inactive NUDIX hydrolase domain;
Q15631	56	1.728	Up	0.00117994	K	Translin OS=Homo sapiens OX=9606 GN=TSN PE=1 SV=1	TSN	1	2.53093e-08	93.804	EILTLLQGVHQGAGFQDIPK(1)R	3	-0.52906	1	0.696	0.66	0.746	1.349	1.135	1.148	cytoplasm	GO:0006725 cellular aromatic compound metabolic process; GO:0006259 DNA metabolic process; GO:0060255 regulation of macromolecule metabolic process; GO:0044699 single-organism process; GO:0048519 negative regulation of biological process; GO:0044237 cellular metabolic process; GO:0071704 organic substance metabolic process; GO:0008152 metabolic process; GO:0046483 heterocycle metabolic process; G…	GO:0043226 organelle; GO:0043231 intracellular membrane-bounded organelle; GO:0043229 intracellular organelle; GO:0005634 nucleus; GO:0044464 cell part; GO:0005622 intracellular; GO:0005737 cytoplasm; GO:0044424 intracellular part; GO:0043227 membrane-bounded organelle; GO:0005623 cell; GO:0005829 cytosol; GO:0044444 cytoplasmic part;	GO:0003677 DNA binding; GO:0003723 RNA binding; GO:0044877 macromolecular complex binding; GO:0003697 single-stranded DNA binding; GO:0005515 protein binding; GO:0016787 hydrolase activity; GO:0043565 sequence-specific DNA binding; GO:1901363 heterocyclic compound binding; GO:0097159 organic cyclic compound binding; GO:0003729 mRNA binding; GO:0042802 identical protein binding; GO:0003824 catalyt…				IPR016069; IPR016068;	Translin, C-terminal; Translin, N-terminal;
P0C7M7	566	1.915	Up	0.000163329	K	Acyl-coenzyme A synthetase ACSM4, mitochondrial OS=Homo sapiens OX=9606 GN=ACSM4 PE=2 SV=1	ACSM4	1	0.0260859	81.296	TITGK(1)IK	2	0.050763	1	0.69	0.592	0.664	1.211	1.257	1.259	mitochondria	GO:0016053 organic acid biosynthetic process; GO:0044699 single-organism process; GO:0009058 biosynthetic process; GO:0044255 cellular lipid metabolic process; GO:0044237 cellular metabolic process; GO:0008610 lipid biosynthetic process; GO:0071704 organic substance metabolic process; GO:0008152 metabolic process; GO:0032787 monocarboxylic acid metabolic process; GO:0009987 cellular process; GO:0…	GO:0005759 mitochondrial matrix; GO:0043229 intracellular organelle; GO:0044429 mitochondrial part; GO:0005737 cytoplasm; GO:0044446 intracellular organelle part; GO:0044424 intracellular part; GO:0005623 cell; GO:0005739 mitochondrion; GO:0044422 organelle part; GO:0031974 membrane-enclosed lumen; GO:0043226 organelle; GO:0043231 intracellular membrane-bounded organelle; GO:0070013 intracellular…	GO:1901265 nucleoside phosphate binding; GO:0016874 ligase activity; GO:0047760 butyrate-CoA ligase activity; GO:0016877 ligase activity, forming carbon-sulfur bonds; GO:0097159 organic cyclic compound binding; GO:1901363 heterocyclic compound binding; GO:0016746 transferase activity, transferring acyl groups; GO:0003824 catalytic activity; GO:0032553 ribonucleotide binding; GO:0005488 binding; G…	K01896	ACSM; medium-chain acyl-CoA synthetase [EC:6.2.1.2]	hsa00650 Butanoate metabolism; hsa01100 Metabolic pathways	IPR025110; IPR000873;	AMP-binding enzyme C-terminal domain; AMP-dependent synthetase/ligase;
P30101	494	1.633	Up	0.00061616	K	Protein disulfide-isomerase A3 OS=Homo sapiens OX=9606 GN=PDIA3 PE=1 SV=4	PDIA3	1	1.11552e-22	158.91	EATNPPVIQEEK(1)PK	2	-0.21724	3	0.713	0.703	0.767	1.119	1.287	1.158	endoplasmic reticulum	GO:0044700 single organism signaling; GO:0010941 regulation of cell death; GO:0065008 regulation of biological quality; GO:0072594 establishment of protein localization to organelle; GO:0017038 protein import; GO:0023051 regulation of signaling; GO:0044699 single-organism process; GO:0051169 nuclear transport; GO:2001238 positive regulation of extrinsic apoptotic signaling pathway; GO:0015031 pro…	GO:0016020 membrane; GO:0044421 extracellular region part; GO:0005783 endoplasmic reticulum; GO:0031090 organelle membrane; GO:0031410 cytoplasmic vesicle; GO:0030054 cell junction; GO:0031982 vesicle; GO:0005737 cytoplasm; GO:0044433 cytoplasmic vesicle part; GO:0055038 recycling endosome membrane; GO:0044424 intracellular part; GO:0005623 cell; GO:0044422 organelle part; GO:0055037 recycling en…	GO:0003723 RNA binding; GO:0008233 peptidase activity; GO:0004629 phospholipase C activity; GO:0008234 cysteine-type peptidase activity; GO:0005515 protein binding; GO:0016787 hydrolase activity; GO:0003756 protein disulfide isomerase activity; GO:0016298 lipase activity; GO:0016491 oxidoreductase activity; GO:0004175 endopeptidase activity; GO:0015036 disulfide oxidoreductase activity; GO:190136…	K08056	PDIA3, GRP58; protein disulfide isomerase family A, member 3 [EC:5.3.4.1]	hsa04141 Protein processing in endoplasmic reticulum; hsa04612 Antigen processing and presentation; hsa05163 Human cytomegalovirus infection; hsa05168 Herpes simplex virus 1 infection; hsa05169 Epstein-Barr virus infection; hsa05170 Human immunodeficiency virus 1 infection	IPR005788; IPR013766; IPR012336;	Disulphide isomerase; Thioredoxin domain; Thioredoxin-like fold;
P30101	82	0.469	Down	4.061e-05	K	Protein disulfide-isomerase A3 OS=Homo sapiens OX=9606 GN=PDIA3 PE=1 SV=4	PDIA3	1	6.15521e-11	117.18	GIVPLAK(1)VDCTANTNTCNK	3	-0.14257	4	1.365	1.513	1.526	0.693	0.669	0.704	endoplasmic reticulum	GO:0044700 single organism signaling; GO:0010941 regulation of cell death; GO:0065008 regulation of biological quality; GO:0072594 establishment of protein localization to organelle; GO:0017038 protein import; GO:0023051 regulation of signaling; GO:0044699 single-organism process; GO:0051169 nuclear transport; GO:2001238 positive regulation of extrinsic apoptotic signaling pathway; GO:0015031 pro…	GO:0016020 membrane; GO:0044421 extracellular region part; GO:0005783 endoplasmic reticulum; GO:0031090 organelle membrane; GO:0031410 cytoplasmic vesicle; GO:0030054 cell junction; GO:0031982 vesicle; GO:0005737 cytoplasm; GO:0044433 cytoplasmic vesicle part; GO:0055038 recycling endosome membrane; GO:0044424 intracellular part; GO:0005623 cell; GO:0044422 organelle part; GO:0055037 recycling en…	GO:0003723 RNA binding; GO:0008233 peptidase activity; GO:0004629 phospholipase C activity; GO:0008234 cysteine-type peptidase activity; GO:0005515 protein binding; GO:0016787 hydrolase activity; GO:0003756 protein disulfide isomerase activity; GO:0016298 lipase activity; GO:0016491 oxidoreductase activity; GO:0004175 endopeptidase activity; GO:0015036 disulfide oxidoreductase activity; GO:190136…	K08056	PDIA3, GRP58; protein disulfide isomerase family A, member 3 [EC:5.3.4.1]	hsa04141 Protein processing in endoplasmic reticulum; hsa04612 Antigen processing and presentation; hsa05163 Human cytomegalovirus infection; hsa05168 Herpes simplex virus 1 infection; hsa05169 Epstein-Barr virus infection; hsa05170 Human immunodeficiency virus 1 infection	IPR005788; IPR013766; IPR012336;	Disulphide isomerase; Thioredoxin domain; Thioredoxin-like fold;
P30101	94	0.42	Down	4.8366e-06	K	Protein disulfide-isomerase A3 OS=Homo sapiens OX=9606 GN=PDIA3 PE=1 SV=4	PDIA3	1	3.5914e-41	161.47	VDCTANTNTCNK(1)YGVSGYPTLK	4	-0.65929	5	1.559	1.492	1.558	0.681	0.625	0.63	endoplasmic reticulum	GO:0044700 single organism signaling; GO:0010941 regulation of cell death; GO:0065008 regulation of biological quality; GO:0072594 establishment of protein localization to organelle; GO:0017038 protein import; GO:0023051 regulation of signaling; GO:0044699 single-organism process; GO:0051169 nuclear transport; GO:2001238 positive regulation of extrinsic apoptotic signaling pathway; GO:0015031 pro…	GO:0016020 membrane; GO:0044421 extracellular region part; GO:0005783 endoplasmic reticulum; GO:0031090 organelle membrane; GO:0031410 cytoplasmic vesicle; GO:0030054 cell junction; GO:0031982 vesicle; GO:0005737 cytoplasm; GO:0044433 cytoplasmic vesicle part; GO:0055038 recycling endosome membrane; GO:0044424 intracellular part; GO:0005623 cell; GO:0044422 organelle part; GO:0055037 recycling en…	GO:0003723 RNA binding; GO:0008233 peptidase activity; GO:0004629 phospholipase C activity; GO:0008234 cysteine-type peptidase activity; GO:0005515 protein binding; GO:0016787 hydrolase activity; GO:0003756 protein disulfide isomerase activity; GO:0016298 lipase activity; GO:0016491 oxidoreductase activity; GO:0004175 endopeptidase activity; GO:0015036 disulfide oxidoreductase activity; GO:190136…	K08056	PDIA3, GRP58; protein disulfide isomerase family A, member 3 [EC:5.3.4.1]	hsa04141 Protein processing in endoplasmic reticulum; hsa04612 Antigen processing and presentation; hsa05163 Human cytomegalovirus infection; hsa05168 Herpes simplex virus 1 infection; hsa05169 Epstein-Barr virus infection; hsa05170 Human immunodeficiency virus 1 infection	IPR005788; IPR013766; IPR012336;	Disulphide isomerase; Thioredoxin domain; Thioredoxin-like fold;
P30101	415	0.45	Down	0.0022784	K	Protein disulfide-isomerase A3 OS=Homo sapiens OX=9606 GN=PDIA3 PE=1 SV=4	PDIA3	1	0.0215894	85.676	NLEPK(1)YK	3	0.15336	4	1.566	1.535	1.386	0.673	0.669	0.679	endoplasmic reticulum	GO:0044700 single organism signaling; GO:0010941 regulation of cell death; GO:0065008 regulation of biological quality; GO:0072594 establishment of protein localization to organelle; GO:0017038 protein import; GO:0023051 regulation of signaling; GO:0044699 single-organism process; GO:0051169 nuclear transport; GO:2001238 positive regulation of extrinsic apoptotic signaling pathway; GO:0015031 pro…	GO:0016020 membrane; GO:0044421 extracellular region part; GO:0005783 endoplasmic reticulum; GO:0031090 organelle membrane; GO:0031410 cytoplasmic vesicle; GO:0030054 cell junction; GO:0031982 vesicle; GO:0005737 cytoplasm; GO:0044433 cytoplasmic vesicle part; GO:0055038 recycling endosome membrane; GO:0044424 intracellular part; GO:0005623 cell; GO:0044422 organelle part; GO:0055037 recycling en…	GO:0003723 RNA binding; GO:0008233 peptidase activity; GO:0004629 phospholipase C activity; GO:0008234 cysteine-type peptidase activity; GO:0005515 protein binding; GO:0016787 hydrolase activity; GO:0003756 protein disulfide isomerase activity; GO:0016298 lipase activity; GO:0016491 oxidoreductase activity; GO:0004175 endopeptidase activity; GO:0015036 disulfide oxidoreductase activity; GO:190136…	K08056	PDIA3, GRP58; protein disulfide isomerase family A, member 3 [EC:5.3.4.1]	hsa04141 Protein processing in endoplasmic reticulum; hsa04612 Antigen processing and presentation; hsa05163 Human cytomegalovirus infection; hsa05168 Herpes simplex virus 1 infection; hsa05169 Epstein-Barr virus infection; hsa05170 Human immunodeficiency virus 1 infection	IPR005788; IPR013766; IPR012336;	Disulphide isomerase; Thioredoxin domain; Thioredoxin-like fold;
Q13009	564	2.554	Up	2.264e-05	K	T-lymphoma invasion and metastasis-inducing protein 1 OS=Homo sapiens OX=9606 GN=TIAM1 PE=1 SV=2	TIAM1	1	0.00536023	86.794	LLK(1)SEIK	3	-0.69534	1	0.501	0.52	0.54	1.387	1.234	1.366	nucleus	GO:0044700 single organism signaling; GO:0032872 regulation of stress-activated MAPK cascade; GO:1903975 regulation of glial cell migration; GO:0010941 regulation of cell death; GO:0014013 regulation of gliogenesis; GO:0050796 regulation of insulin secretion; GO:0071900 regulation of protein serine/threonine kinase activity; GO:0044093 positive regulation of molecular function; GO:0007160 cell-ma…	GO:0030425 dendrite; GO:0016020 membrane; GO:0019898 extrinsic component of membrane; GO:0032587 ruffle membrane; GO:0005737 cytoplasm; GO:0043025 neuronal cell body; GO:0005623 cell; GO:0099080 supramolecular complex; GO:0009898 cytoplasmic side of plasma membrane; GO:0043197 dendritic spine; GO:0044422 organelle part; GO:0043228 non-membrane-bounded organelle; GO:0098590 plasma membrane region;…	GO:0031267 small GTPase binding; GO:0017048 Rho GTPase binding; GO:0048365 Rac GTPase binding; GO:1990782 protein tyrosine kinase binding; GO:0005102 receptor binding; GO:0005085 guanyl-nucleotide exchange factor activity; GO:0019901 protein kinase binding; GO:0015631 tubulin binding; GO:0005515 protein binding; GO:0019900 kinase binding; GO:0098772 molecular function regulator; GO:0004871 signal…	K05731	TIAM1; T-lymphoma invasion and metastasis-inducing protein 1	hsa04014 Ras signaling pathway; hsa04015 Rap1 signaling pathway; hsa04024 cAMP signaling pathway; hsa04062 Chemokine signaling pathway; hsa04530 Tight junction; hsa04810 Regulation of actin cytoskeleton; hsa05205 Proteoglycans in cancer	IPR003116; IPR011993; IPR001478; IPR000219; IPR001849;	Raf-like Ras-binding; PH domain-like; PDZ domain; Dbl homology (DH) domain; Pleckstrin homology domain;
P13639	32	1.652	Up	0.0028208	K	Elongation factor 2 OS=Homo sapiens OX=9606 GN=EEF2 PE=1 SV=4	EEF2	1	0.000910029	50.858	NMSVIAHVDHGK(1)STLTDSLVCK	4	-0.77941	1	0.655	0.728	0.777	1.058	1.229	1.282	cytoplasm	GO:0045321 leukocyte activation; GO:0032270 positive regulation of cellular protein metabolic process; GO:0006518 peptide metabolic process; GO:0010608 posttranscriptional regulation of gene expression; GO:0009891 positive regulation of biosynthetic process; GO:0044237 cellular metabolic process; GO:0009605 response to external stimulus; GO:0008213 protein alkylation; GO:0008152 metabolic process…	GO:0016020 membrane; GO:0034774 secretory granule lumen; GO:0044421 extracellular region part; GO:0031410 cytoplasmic vesicle; GO:0071944 cell periphery; GO:0098857 membrane microdomain; GO:0031982 vesicle; GO:0005737 cytoplasm; GO:0044433 cytoplasmic vesicle part; GO:0032991 macromolecular complex; GO:0044424 intracellular part; GO:0005623 cell; GO:1904813 ficolin-1-rich granule lumen; GO:004442…	GO:0051015 actin filament binding; GO:1901265 nucleoside phosphate binding; GO:0003746 translation elongation factor activity; GO:0019901 protein kinase binding; GO:0016817 hydrolase activity, acting on acid anhydrides; GO:0016787 hydrolase activity; GO:0005515 protein binding; GO:1901363 heterocyclic compound binding; GO:0097159 organic cyclic compound binding; GO:0016462 pyrophosphatase activit…	K03234	EEF2; elongation factor 2	hsa04152 AMPK signaling pathway; hsa04921 Oxytocin signaling pathway	IPR027417; IPR000795; IPR005517; IPR005225; IPR000640; IPR004161; IPR020568; IPR009022; IPR014721; IPR009000;	P-loop containing nucleoside triphosphate hydrolase; Transcription factor, GTP-binding domain; Translation elongation factor EFG/EF2, domain IV; Small GTP-binding protein domain; Translation elongation factor EFG, V domain; Translation elongation factor EFTu-like, domain 2; Ribosomal protein S5 domain 2-type fold; Elongation factor G, III-V domain; Ribosomal protein S5 domain 2-type fold, subgrou…
P13639	571	0.45	Down	1.99925e-05	K	Elongation factor 2 OS=Homo sapiens OX=9606 GN=EEF2 PE=1 SV=4	EEF2	1	3.14699e-17	154.28	DLEEDHACIPIK(1)K	2	-0.69618	3	1.467	1.535	1.479	0.652	0.65	0.715	cytoplasm	GO:0045321 leukocyte activation; GO:0032270 positive regulation of cellular protein metabolic process; GO:0006518 peptide metabolic process; GO:0010608 posttranscriptional regulation of gene expression; GO:0009891 positive regulation of biosynthetic process; GO:0044237 cellular metabolic process; GO:0009605 response to external stimulus; GO:0008213 protein alkylation; GO:0008152 metabolic process…	GO:0016020 membrane; GO:0034774 secretory granule lumen; GO:0044421 extracellular region part; GO:0031410 cytoplasmic vesicle; GO:0071944 cell periphery; GO:0098857 membrane microdomain; GO:0031982 vesicle; GO:0005737 cytoplasm; GO:0044433 cytoplasmic vesicle part; GO:0032991 macromolecular complex; GO:0044424 intracellular part; GO:0005623 cell; GO:1904813 ficolin-1-rich granule lumen; GO:004442…	GO:0051015 actin filament binding; GO:1901265 nucleoside phosphate binding; GO:0003746 translation elongation factor activity; GO:0019901 protein kinase binding; GO:0016817 hydrolase activity, acting on acid anhydrides; GO:0016787 hydrolase activity; GO:0005515 protein binding; GO:1901363 heterocyclic compound binding; GO:0097159 organic cyclic compound binding; GO:0016462 pyrophosphatase activit…	K03234	EEF2; elongation factor 2	hsa04152 AMPK signaling pathway; hsa04921 Oxytocin signaling pathway	IPR027417; IPR000795; IPR005517; IPR005225; IPR000640; IPR004161; IPR020568; IPR009022; IPR014721; IPR009000;	P-loop containing nucleoside triphosphate hydrolase; Transcription factor, GTP-binding domain; Translation elongation factor EFG/EF2, domain IV; Small GTP-binding protein domain; Translation elongation factor EFG, V domain; Translation elongation factor EFTu-like, domain 2; Ribosomal protein S5 domain 2-type fold; Elongation factor G, III-V domain; Ribosomal protein S5 domain 2-type fold, subgrou…
P13639	594	0.491	Down	0.00046028	K	Elongation factor 2 OS=Homo sapiens OX=9606 GN=EEF2 PE=1 SV=4	EEF2	1	1.69803e-09	110.12	ETVSEESNVLCLSK(1)SPNK	3	-0.52971	1	1.437	1.587	1.307	0.754	0.662	0.709	cytoplasm	GO:0045321 leukocyte activation; GO:0032270 positive regulation of cellular protein metabolic process; GO:0006518 peptide metabolic process; GO:0010608 posttranscriptional regulation of gene expression; GO:0009891 positive regulation of biosynthetic process; GO:0044237 cellular metabolic process; GO:0009605 response to external stimulus; GO:0008213 protein alkylation; GO:0008152 metabolic process…	GO:0016020 membrane; GO:0034774 secretory granule lumen; GO:0044421 extracellular region part; GO:0031410 cytoplasmic vesicle; GO:0071944 cell periphery; GO:0098857 membrane microdomain; GO:0031982 vesicle; GO:0005737 cytoplasm; GO:0044433 cytoplasmic vesicle part; GO:0032991 macromolecular complex; GO:0044424 intracellular part; GO:0005623 cell; GO:1904813 ficolin-1-rich granule lumen; GO:004442…	GO:0051015 actin filament binding; GO:1901265 nucleoside phosphate binding; GO:0003746 translation elongation factor activity; GO:0019901 protein kinase binding; GO:0016817 hydrolase activity, acting on acid anhydrides; GO:0016787 hydrolase activity; GO:0005515 protein binding; GO:1901363 heterocyclic compound binding; GO:0097159 organic cyclic compound binding; GO:0016462 pyrophosphatase activit…	K03234	EEF2; elongation factor 2	hsa04152 AMPK signaling pathway; hsa04921 Oxytocin signaling pathway	IPR027417; IPR000795; IPR005517; IPR005225; IPR000640; IPR004161; IPR020568; IPR009022; IPR014721; IPR009000;	P-loop containing nucleoside triphosphate hydrolase; Transcription factor, GTP-binding domain; Translation elongation factor EFG/EF2, domain IV; Small GTP-binding protein domain; Translation elongation factor EFG, V domain; Translation elongation factor EFTu-like, domain 2; Ribosomal protein S5 domain 2-type fold; Elongation factor G, III-V domain; Ribosomal protein S5 domain 2-type fold, subgrou…
P13639	598	0.58	Down	0.00046399	K	Elongation factor 2 OS=Homo sapiens OX=9606 GN=EEF2 PE=1 SV=4	EEF2	1	0.00264743	98.997	SPNK(1)HNR	3	0.56105	1	1.312	1.363	1.338	0.73	0.742	0.857	cytoplasm	GO:0045321 leukocyte activation; GO:0032270 positive regulation of cellular protein metabolic process; GO:0006518 peptide metabolic process; GO:0010608 posttranscriptional regulation of gene expression; GO:0009891 positive regulation of biosynthetic process; GO:0044237 cellular metabolic process; GO:0009605 response to external stimulus; GO:0008213 protein alkylation; GO:0008152 metabolic process…	GO:0016020 membrane; GO:0034774 secretory granule lumen; GO:0044421 extracellular region part; GO:0031410 cytoplasmic vesicle; GO:0071944 cell periphery; GO:0098857 membrane microdomain; GO:0031982 vesicle; GO:0005737 cytoplasm; GO:0044433 cytoplasmic vesicle part; GO:0032991 macromolecular complex; GO:0044424 intracellular part; GO:0005623 cell; GO:1904813 ficolin-1-rich granule lumen; GO:004442…	GO:0051015 actin filament binding; GO:1901265 nucleoside phosphate binding; GO:0003746 translation elongation factor activity; GO:0019901 protein kinase binding; GO:0016817 hydrolase activity, acting on acid anhydrides; GO:0016787 hydrolase activity; GO:0005515 protein binding; GO:1901363 heterocyclic compound binding; GO:0097159 organic cyclic compound binding; GO:0016462 pyrophosphatase activit…	K03234	EEF2; elongation factor 2	hsa04152 AMPK signaling pathway; hsa04921 Oxytocin signaling pathway	IPR027417; IPR000795; IPR005517; IPR005225; IPR000640; IPR004161; IPR020568; IPR009022; IPR014721; IPR009000;	P-loop containing nucleoside triphosphate hydrolase; Transcription factor, GTP-binding domain; Translation elongation factor EFG/EF2, domain IV; Small GTP-binding protein domain; Translation elongation factor EFG, V domain; Translation elongation factor EFTu-like, domain 2; Ribosomal protein S5 domain 2-type fold; Elongation factor G, III-V domain; Ribosomal protein S5 domain 2-type fold, subgrou…
Q86VP6	1156	0.274	Down	3.721e-05	K	Cullin-associated NEDD8-dissociated protein 1 OS=Homo sapiens OX=9606 GN=CAND1 PE=1 SV=2	CAND1	1	0.0029114	109.66	ATCTTK(1)VK	2	-0.76433	1	1.718	1.882	1.712	0.446	0.471	0.538	cytoplasm	GO:0060260 regulation of transcription initiation from RNA polymerase II promoter; GO:0044085 cellular component biogenesis; GO:0045321 leukocyte activation; GO:0048869 cellular developmental process; GO:0009891 positive regulation of biosynthetic process; GO:0044699 single-organism process; GO:0044237 cellular metabolic process; GO:0051234 establishment of localization; GO:0051130 positive regul…	GO:0016020 membrane; GO:0034774 secretory granule lumen; GO:0044421 extracellular region part; GO:0031410 cytoplasmic vesicle; GO:0031982 vesicle; GO:0005737 cytoplasm; GO:0044433 cytoplasmic vesicle part; GO:0032991 macromolecular complex; GO:0044424 intracellular part; GO:0005623 cell; GO:1904813 ficolin-1-rich granule lumen; GO:0044422 organelle part; GO:0070062 extracellular exosome; GO:01010…	GO:0005515 protein binding; GO:0017025 TBP-class protein binding; GO:0008134 transcription factor binding; GO:0005488 binding;	K17263	CAND1; cullin-associated NEDD8-dissociated protein 1		IPR011989; IPR016024; IPR013932;	Armadillo-like helical; Armadillo-type fold; TATA-binding protein interacting (TIP20);
Q86VP6	574	0.542	Down	1.76329e-05	K	Cullin-associated NEDD8-dissociated protein 1 OS=Homo sapiens OX=9606 GN=CAND1 PE=1 SV=2	CAND1	1	0.00447842	82.417	DLFTCTIK(1)R	2	-0.13578	1	1.332	1.403	1.407	0.723	0.759	0.762	cytoplasm	GO:0060260 regulation of transcription initiation from RNA polymerase II promoter; GO:0044085 cellular component biogenesis; GO:0045321 leukocyte activation; GO:0048869 cellular developmental process; GO:0009891 positive regulation of biosynthetic process; GO:0044699 single-organism process; GO:0044237 cellular metabolic process; GO:0051234 establishment of localization; GO:0051130 positive regul…	GO:0016020 membrane; GO:0034774 secretory granule lumen; GO:0044421 extracellular region part; GO:0031410 cytoplasmic vesicle; GO:0031982 vesicle; GO:0005737 cytoplasm; GO:0044433 cytoplasmic vesicle part; GO:0032991 macromolecular complex; GO:0044424 intracellular part; GO:0005623 cell; GO:1904813 ficolin-1-rich granule lumen; GO:0044422 organelle part; GO:0070062 extracellular exosome; GO:01010…	GO:0005515 protein binding; GO:0017025 TBP-class protein binding; GO:0008134 transcription factor binding; GO:0005488 binding;	K17263	CAND1; cullin-associated NEDD8-dissociated protein 1		IPR011989; IPR016024; IPR013932;	Armadillo-like helical; Armadillo-type fold; TATA-binding protein interacting (TIP20);
O43865	108	0.356	Down	2.2281e-05	K	S-adenosylhomocysteine hydrolase-like protein 1 OS=Homo sapiens OX=9606 GN=AHCYL1 PE=1 SV=2	AHCYL1	1	2.22772e-05	116.24	GSSNFCVK(1)NIK	2	-0.21437	2	1.681	1.607	1.609	0.598	0.531	0.613	cytoplasm	GO:0044700 single organism signaling; GO:0009116 nucleoside metabolic process; GO:1904385 cellular response to angiotensin; GO:0051169 nuclear transport; GO:0044237 cellular metabolic process; GO:0015031 protein transport; GO:0042044 fluid transport; GO:0008152 metabolic process; GO:0046130 purine ribonucleoside catabolic process; GO:0032879 regulation of localization; GO:0031440 regulation of mR…	GO:0016020 membrane; GO:0042175 nuclear outer membrane-endoplasmic reticulum membrane network; GO:0044421 extracellular region part; GO:0005783 endoplasmic reticulum; GO:0016324 apical plasma membrane; GO:0071944 cell periphery; GO:0031982 vesicle; GO:0005737 cytoplasm; GO:0044424 intracellular part; GO:0005623 cell; GO:0044422 organelle part; GO:0070062 extracellular exosome; GO:0098590 plasma m…	GO:0003723 RNA binding; GO:0016801 hydrolase activity, acting on ether bonds; GO:1901265 nucleoside phosphate binding; GO:0016787 hydrolase activity; GO:0005515 protein binding; GO:0000166 nucleotide binding; GO:0048037 cofactor binding; GO:1901363 heterocyclic compound binding; GO:0097159 organic cyclic compound binding; GO:0004013 adenosylhomocysteinase activity; GO:0042802 identical protein bi…	K01251	E3.3.1.1, ahcY; adenosylhomocysteinase [EC:3.3.1.1]	hsa00270 Cysteine and methionine metabolism; hsa01100 Metabolic pathways	IPR016040; IPR015878;	NAD(P)-binding domain; S-adenosyl-L-homocysteine hydrolase, NAD binding domain;
Q6NVY1	42	0.416	Down	1.2496e-06	K	3-hydroxyisobutyryl-CoA hydrolase, mitochondrial OS=Homo sapiens OX=9606 GN=HIBCH PE=1 SV=2	HIBCH	1	3.31192e-05	101.53	HTDAAEEVLLEK(1)K	3	-0.054608	1	1.5	1.553	1.57	0.618	0.652	0.651	mitochondria	GO:1901606 alpha-amino acid catabolic process; GO:0044712 single-organism catabolic process; GO:0044281 small molecule metabolic process; GO:0044763 single-organism cellular process; GO:0006574 valine catabolic process; GO:0006807 nitrogen compound metabolic process; GO:0044699 single-organism process; GO:0044282 small molecule catabolic process; GO:1901605 alpha-amino acid metabolic process; GO:…	GO:0005759 mitochondrial matrix; GO:0043229 intracellular organelle; GO:0044421 extracellular region part; GO:0044429 mitochondrial part; GO:0005737 cytoplasm; GO:0044446 intracellular organelle part; GO:0031982 vesicle; GO:0044424 intracellular part; GO:0005623 cell; GO:0005576 extracellular region; GO:0044422 organelle part; GO:0005739 mitochondrion; GO:0043231 intracellular membrane-bounded or…	GO:0016289 CoA hydrolase activity; GO:0016787 hydrolase activity; GO:0016790 thiolester hydrolase activity; GO:0003824 catalytic activity; GO:0003860 3-hydroxyisobutyryl-CoA hydrolase activity; GO:0016788 hydrolase activity, acting on ester bonds;	K05605	HIBCH; 3-hydroxyisobutyryl-CoA hydrolase [EC:3.1.2.4]	hsa00280 Valine, leucine and isoleucine degradation; hsa00410 beta-Alanine metabolism; hsa00640 Propanoate metabolism; hsa01100 Metabolic pathways; hsa01200 Carbon metabolism	IPR029045; IPR014748;	ClpP/crotonase-like domain; Crontonase, C-terminal;
Q6P996	358	0.642	Down	0.00114466	K	Pyridoxal-dependent decarboxylase domain-containing protein 1 OS=Homo sapiens OX=9606 GN=PDXDC1 PE=1 SV=2	PDXDC1	1	0.00214031	74.53	IK(1)HACQLSQR	3	-0.9615	1	1.253	1.351	1.229	0.886	0.817	0.758	cytoplasm	GO:0008152 metabolic process; GO:0044710 single-organism metabolic process; GO:0044281 small molecule metabolic process; GO:0044763 single-organism cellular process; GO:0019752 carboxylic acid metabolic process; GO:0044699 single-organism process; GO:0006082 organic acid metabolic process; GO:0044237 cellular metabolic process; GO:0009987 cellular process; GO:0043436 oxoacid metabolic process; GO…	GO:0043231 intracellular membrane-bounded organelle; GO:0043226 organelle; GO:0043229 intracellular organelle; GO:0044464 cell part; GO:0005622 intracellular; GO:0005737 cytoplasm; GO:0012505 endomembrane system; GO:0044424 intracellular part; GO:0005794 Golgi apparatus; GO:0043227 membrane-bounded organelle; GO:0005623 cell; GO:0044444 cytoplasmic part;	GO:0097159 organic cyclic compound binding; GO:1901363 heterocyclic compound binding; GO:0050839 cell adhesion molecule binding; GO:0003824 catalytic activity; GO:0005488 binding; GO:0016830 carbon-carbon lyase activity; GO:0045296 cadherin binding; GO:0043167 ion binding; GO:0016831 carboxy-lyase activity; GO:0016829 lyase activity; GO:0005515 protein binding; GO:0043168 anion binding; GO:004803…				IPR015424; IPR015421; IPR015422;	Pyridoxal phosphate-dependent transferase; Pyridoxal phosphate-dependent transferase, major region, subdomain 1; Pyridoxal phosphate-dependent transferase, major region, subdomain 2;
Q9C0B1	469	0.431	Down	1.50745e-05	K	Alpha-ketoglutarate-dependent dioxygenase FTO OS=Homo sapiens OX=9606 GN=FTO PE=1 SV=3	FTO	1	6.61723e-06	122.55	TLPADQK(1)PECR	2	-1.0807	1	1.579	1.476	1.506	0.627	0.677	0.663	cytoplasm	GO:0065008 regulation of biological quality; GO:0070989 oxidative demethylation; GO:0080111 DNA demethylation; GO:0044699 single-organism process; GO:0009451 RNA modification; GO:0044237 cellular metabolic process; GO:0048871 multicellular organismal homeostasis; GO:0035511 oxidative DNA demethylation; GO:0035510 DNA dealkylation; GO:0008152 metabolic process; GO:0035553 oxidative single-stranded…	GO:0043229 intracellular organelle; GO:0044446 intracellular organelle part; GO:0031981 nuclear lumen; GO:0044424 intracellular part; GO:0016604 nuclear body; GO:0005623 cell; GO:0044422 organelle part; GO:0043231 intracellular membrane-bounded organelle; GO:0043226 organelle; GO:0031974 membrane-enclosed lumen; GO:0005634 nucleus; GO:0005654 nucleoplasm; GO:0070013 intracellular organelle lumen;…	GO:0005506 iron ion binding; GO:0035514 DNA demethylase activity; GO:0043167 ion binding; GO:0043734 DNA-N1-methyladenine dioxygenase activity; GO:0016705 oxidoreductase activity, acting on paired donors, with incorporation or reduction of molecular oxygen; GO:0035516 oxidative DNA demethylase activity; GO:0016706 oxidoreductase activity, acting on paired donors, with incorporation or reduction o…	K19469	FTO; mRNA N6-methyladenine demethylase [EC:1.14.11.53]		IPR024366; IPR024367;	Alpha-ketoglutarate-dependent dioxygenase FTO, C-terminal; Alpha-ketoglutarate-dependent dioxygenase FTO, catalytic domain;
P45973	91	1.882	Up	0.000176434	K	Chromobox protein homolog 5 OS=Homo sapiens OX=9606 GN=CBX5 PE=1 SV=1	CBX5	1	6.4636e-18	162.37	K(1)SNFSNSADDIK	2	-0.43997	1	0.616	0.7	0.656	1.302	1.23	1.179	nucleus	GO:0050794 regulation of cellular process; GO:0044707 single-multicellular organism process; GO:0007596 blood coagulation; GO:0065008 regulation of biological quality; GO:0060255 regulation of macromolecule metabolic process; GO:0019219 regulation of nucleobase-containing compound metabolic process; GO:0044699 single-organism process; GO:0044764 multi-organism cellular process; GO:0048519 negativ…	GO:0000784 nuclear chromosome, telomeric region; GO:0000781 chromosome, telomeric region; GO:0032991 macromolecular complex; GO:0017053 transcriptional repressor complex; GO:0044424 intracellular part; GO:0005623 cell; GO:0000792 heterochromatin; GO:0000118 histone deacetylase complex; GO:0044422 organelle part; GO:0044427 chromosomal part; GO:0043228 non-membrane-bounded organelle; GO:0031974 me…	GO:0042393 histone binding; GO:0042802 identical protein binding; GO:0042826 histone deacetylase binding; GO:0030674 protein binding, bridging; GO:0070491 repressing transcription factor binding; GO:0035064 methylated histone binding; GO:0042803 protein homodimerization activity; GO:0005488 binding; GO:0046983 protein dimerization activity; GO:0060090 binding, bridging; GO:0005515 protein binding…	K11587	CBX5, HP1A; chromobox protein 5		IPR017984; IPR008251; IPR023780; IPR016197; IPR000953;	Chromo domain subgroup; Chromo shadow domain; Chromo domain; Chromo domain-like; Chromo/chromo shadow domain;
P09001	235	2.005	Up	0.00074339	K	39S ribosomal protein L3, mitochondrial OS=Homo sapiens OX=9606 GN=MRPL3 PE=1 SV=1	MRPL3	1	7.32746e-11	124.42	GQPATHGQTK(1)THR	3	-0.88038	2	0.604	0.565	0.712	1.324	1.19	1.258	cytoplasm	GO:0016043 cellular component organization; GO:0006518 peptide metabolic process; GO:0044267 cellular protein metabolic process; GO:0044699 single-organism process; GO:0009058 biosynthetic process; GO:1901566 organonitrogen compound biosynthetic process; GO:0044237 cellular metabolic process; GO:0043241 protein complex disassembly; GO:0071704 organic substance metabolic process; GO:0008152 metabo…	GO:0016020 membrane; GO:0031090 organelle membrane; GO:0005737 cytoplasm; GO:0032991 macromolecular complex; GO:0044424 intracellular part; GO:0005762 mitochondrial large ribosomal subunit; GO:0005623 cell; GO:0000313 organellar ribosome; GO:0044422 organelle part; GO:0043228 non-membrane-bounded organelle; GO:0005740 mitochondrial envelope; GO:0031974 membrane-enclosed lumen; GO:0070013 intracel…	GO:0097159 organic cyclic compound binding; GO:1901363 heterocyclic compound binding; GO:0003723 RNA binding; GO:0005488 binding; GO:0003676 nucleic acid binding; GO:0005198 structural molecule activity; GO:0003735 structural constituent of ribosome;	K02906	RP-L3, MRPL3, rplC; large subunit ribosomal protein L3	hsa03010 Ribosome	IPR009000;	Translation protein, beta-barrel domain;
Q01082	1939	0.651	Down	0.00023776	K	Spectrin beta chain, non-erythrocytic 1 OS=Homo sapiens OX=9606 GN=SPTBN1 PE=1 SV=2	SPTBN1	1	0.000969634	115.89	QIEAQEK(1)PR	2	0.21668	1	1.265	1.322	1.215	0.79	0.859	0.826	cytoplasm	GO:0044085 cellular component biogenesis; GO:0044700 single organism signaling; GO:0065008 regulation of biological quality; GO:0007166 cell surface receptor signaling pathway; GO:0032989 cellular component morphogenesis; GO:0090002 establishment of protein localization to plasma membrane; GO:0051169 nuclear transport; GO:0030832 regulation of actin filament length; GO:0044237 cellular metabolic …	GO:0016020 membrane; GO:0044421 extracellular region part; GO:0099568 cytoplasmic region; GO:0005737 cytoplasm; GO:0032991 macromolecular complex; GO:0099080 supramolecular complex; GO:0005623 cell; GO:0044422 organelle part; GO:0032589 neuron projection membrane; GO:0043228 non-membrane-bounded organelle; GO:0070062 extracellular exosome; GO:0098590 plasma membrane region; GO:0031256 leading edg…	GO:0003723 RNA binding; GO:0005085 guanyl-nucleotide exchange factor activity; GO:0044877 macromolecular complex binding; GO:0043167 ion binding; GO:0005515 protein binding; GO:0098772 molecular function regulator; GO:0005516 calmodulin binding; GO:0030506 ankyrin binding; GO:1901363 heterocyclic compound binding; GO:0097159 organic cyclic compound binding; GO:0050839 cell adhesion molecule bindi…	K06115	SPTB; spectrin beta		IPR001605; IPR011993; IPR001715; IPR001849;	Pleckstrin homology domain, spectrin-type; PH domain-like; Calponin homology domain; Pleckstrin homology domain;
Q96T88	546	1.987	Up	0.0040585	K	E3 ubiquitin-protein ligase UHRF1 OS=Homo sapiens OX=9606 GN=UHRF1 PE=1 SV=1	UHRF1	1	0.000183326	96.059	NSK(1)YAPAEGNR	2	0.1761	1	0.675	0.581	0.638	1.244	1.265	1.255	nucleus	GO:0032270 positive regulation of cellular protein metabolic process; GO:0097659 nucleic acid-templated transcription; GO:0009891 positive regulation of biosynthetic process; GO:0051865 protein autoubiquitination; GO:0044237 cellular metabolic process; GO:0008152 metabolic process; GO:0044093 positive regulation of molecular function; GO:0010558 negative regulation of macromolecule biosynthetic p…	GO:0043229 intracellular organelle; GO:0000791 euchromatin; GO:0043232 intracellular non-membrane-bounded organelle; GO:0044446 intracellular organelle part; GO:0031981 nuclear lumen; GO:0044424 intracellular part; GO:0005623 cell; GO:0044422 organelle part; GO:0000792 heterochromatin; GO:0005720 nuclear heterochromatin; GO:0044427 chromosomal part; GO:0043228 non-membrane-bounded organelle; GO:0…	GO:1901265 nucleoside phosphate binding; GO:0035064 methylated histone binding; GO:0003690 double-stranded DNA binding; GO:0008327 methyl-CpG binding; GO:0005515 protein binding; GO:0003682 chromatin binding; GO:0000987 core promoter proximal region sequence-specific DNA binding; GO:0003700 transcription factor activity, sequence-specific DNA binding; GO:1901363 heterocyclic compound binding; GO:…	K10638	UHRF1, NP95; E3 ubiquitin-protein ligase UHRF1 [EC:2.3.2.27]		IPR015947; IPR001841; IPR001965; IPR014722; IPR003105; IPR013083; IPR029071; IPR000626; IPR011011; IPR021991; IPR019787;	PUA-like domain; Zinc finger, RING-type; Zinc finger, PHD-type; Ribosomal protein L2 domain 2; SRA-YDG; Zinc finger, RING/FYVE/PHD-type; Ubiquitin-related domain; Ubiquitin domain; Zinc finger, FYVE/PHD-type; UHRF1, tandem tudor domain; Zinc finger, PHD-finger;
P0DPI2	219	1.607	Up	0.0026612	K	Glutamine amidotransferase-like class 1 domain-containing protein 3A, mitochondrial OS=Homo sapiens OX=9606 GN=GATD3A PE=1 SV=1	GATD3A	1	0.00396169	71.379	ALGAK(1)HCVK	3	-0.43799	1	0.647	0.736	0.824	1.169	1.154	1.223	mitochondria							IPR029062;	Class I glutamine amidotransferase-like;
Q15382	97	1.749	Up	0.000122954	K	GTP-binding protein Rheb OS=Homo sapiens OX=9606 GN=RHEB PE=1 SV=1	RHEB	1	0.0026732	65.842	SFEVIK(1)VIHGK	3	1.1424	1	0.669	0.666	0.743	1.19	1.244	1.201	mitochondria	GO:0044700 single organism signaling; GO:0014013 regulation of gliogenesis; GO:0023051 regulation of signaling; GO:0048869 cellular developmental process; GO:1902533 positive regulation of intracellular signal transduction; GO:0044699 single-organism process; GO:0022008 neurogenesis; GO:0006914 autophagy; GO:0044237 cellular metabolic process; GO:0008152 metabolic process; GO:0007165 signal trans…	GO:0016020 membrane; GO:0042175 nuclear outer membrane-endoplasmic reticulum membrane network; GO:0044421 extracellular region part; GO:0005783 endoplasmic reticulum; GO:0031090 organelle membrane; GO:0031982 vesicle; GO:0005737 cytoplasm; GO:0032991 macromolecular complex; GO:0044424 intracellular part; GO:0005623 cell; GO:0044422 organelle part; GO:0005765 lysosomal membrane; GO:0070062 extrace…	GO:1901265 nucleoside phosphate binding; GO:0019901 protein kinase binding; GO:0016817 hydrolase activity, acting on acid anhydrides; GO:0016787 hydrolase activity; GO:0005515 protein binding; GO:1901363 heterocyclic compound binding; GO:0097159 organic cyclic compound binding; GO:0016462 pyrophosphatase activity; GO:0032553 ribonucleotide binding; GO:0003824 catalytic activity; GO:0005488 bindin…	K07208	RHEB; Ras homolog enriched in brain	hsa04072 Phospholipase D signaling pathway; hsa04140 Autophagy - animal; hsa04150 mTOR signaling pathway; hsa04151 PI3K-Akt signaling pathway; hsa04152 AMPK signaling pathway; hsa04211 Longevity regulating pathway; hsa04218 Cellular senescence; hsa04714 Thermogenesis; hsa04910 Insulin signaling pathway; hsa04919 Thyroid hormone signaling pathway; hsa05163 Human cytomegalovirus infection; hsa05165…	IPR005225; IPR027417;	Small GTP-binding protein domain; P-loop containing nucleoside triphosphate hydrolase;
Q9NQE9	91	0.457	Down	1.70132e-05	K	Histidine triad nucleotide-binding protein 3 OS=Homo sapiens OX=9606 GN=HINT3 PE=1 SV=1	HINT3	1	0.00755873	103.91	K(1)HIGNCR	2	-0.55354	1	1.512	1.546	1.4	0.677	0.687	0.673	extracellular		GO:0043229 intracellular organelle; GO:0044421 extracellular region part; GO:0005737 cytoplasm; GO:0031982 vesicle; GO:0044424 intracellular part; GO:0005623 cell; GO:0005576 extracellular region; GO:0043226 organelle; GO:0070062 extracellular exosome; GO:0043231 intracellular membrane-bounded organelle; GO:0005634 nucleus; GO:0005622 intracellular; GO:0044464 cell part; GO:1903561 extracellular …	GO:0097159 organic cyclic compound binding; GO:1901363 heterocyclic compound binding; GO:0016787 hydrolase activity; GO:0000166 nucleotide binding; GO:1901265 nucleoside phosphate binding; GO:0003824 catalytic activity; GO:0005488 binding; GO:0036094 small molecule binding;				IPR011146;	HIT-like domain;
P49327	1995	0.533	Down	0.0028042	K	Fatty acid synthase OS=Homo sapiens OX=9606 GN=FASN PE=1 SV=3	FASN	1	0.00337403	78.287	PK(1)YSGTLNLDR	2	0.24659	1	1.54	1.495	1.149	0.716	0.763	0.749	cytoplasm	GO:0051188 cofactor biosynthetic process; GO:0001649 osteoblast differentiation; GO:0048732 gland development; GO:0016053 organic acid biosynthetic process; GO:0035337 fatty-acyl-CoA metabolic process; GO:0048869 cellular developmental process; GO:0044699 single-organism process; GO:0044255 cellular lipid metabolic process; GO:0009058 biosynthetic process; GO:0071345 cellular response to cytokine…	GO:0097708 intracellular vesicle; GO:0043229 intracellular organelle; GO:0016020 membrane; GO:0044421 extracellular region part; GO:0031410 cytoplasmic vesicle; GO:0071944 cell periphery; GO:0042470 melanosome; GO:0031982 vesicle; GO:0005737 cytoplasm; GO:0012505 endomembrane system; GO:0044424 intracellular part; GO:0005829 cytosol; GO:0005623 cell; GO:0005576 extracellular region; GO:0005739 mi…	GO:0016417 S-acyltransferase activity; GO:1901265 nucleoside phosphate binding; GO:0004319 enoyl-[acyl-carrier-protein] reductase (NADPH, B-specific) activity; GO:0016628 oxidoreductase activity, acting on the CH-CH group of donors, NAD or NADP as acceptor; GO:0046983 protein dimerization activity; GO:0070402 NADPH binding; GO:0005515 protein binding; GO:0016787 hydrolase activity; GO:0047117 eno…	K00665	FASN; fatty acid synthase, animal type [EC:2.3.1.85]	hsa00061 Fatty acid biosynthesis; hsa01100 Metabolic pathways; hsa01212 Fatty acid metabolism; hsa04152 AMPK signaling pathway; hsa04910 Insulin signaling pathway	IPR016035; IPR020807; IPR013149; IPR020841; IPR011032; IPR020843; IPR013217; IPR013968; IPR016036; IPR032821; IPR029058; IPR014031; IPR029063; IPR014030; IPR014043; IPR020801; IPR016039; IPR020806; IPR023102; IPR016040; IPR009081; IPR001031; IPR001227;	Acyl transferase/acyl hydrolase/lysophospholipase; Polyketide synthase, dehydratase domain; Alcohol dehydrogenase, C-terminal; Polyketide synthase, beta-ketoacyl synthase domain; GroES-like; Polyketide synthase, enoylreductase domain; Methyltransferase type 12; Polyketide synthase, ketoreductase domain; Malonyl-CoA ACP transacylase, ACP-binding; Ketoacyl-synthetase, C-terminal extension; Alpha/Be…
P49327	1993	0.548	Down	0.0055396	K	Fatty acid synthase OS=Homo sapiens OX=9606 GN=FASN PE=1 SV=3	FASN	1	2.1213e-06	79.489	DGLLENQTPEFFQDVCK(1)PK	4	-0.92075	2	1.365	1.363	1.393	0.691	0.761	0.805	cytoplasm	GO:0051188 cofactor biosynthetic process; GO:0001649 osteoblast differentiation; GO:0048732 gland development; GO:0016053 organic acid biosynthetic process; GO:0035337 fatty-acyl-CoA metabolic process; GO:0048869 cellular developmental process; GO:0044699 single-organism process; GO:0044255 cellular lipid metabolic process; GO:0009058 biosynthetic process; GO:0071345 cellular response to cytokine…	GO:0097708 intracellular vesicle; GO:0043229 intracellular organelle; GO:0016020 membrane; GO:0044421 extracellular region part; GO:0031410 cytoplasmic vesicle; GO:0071944 cell periphery; GO:0042470 melanosome; GO:0031982 vesicle; GO:0005737 cytoplasm; GO:0012505 endomembrane system; GO:0044424 intracellular part; GO:0005829 cytosol; GO:0005623 cell; GO:0005576 extracellular region; GO:0005739 mi…	GO:0016417 S-acyltransferase activity; GO:1901265 nucleoside phosphate binding; GO:0004319 enoyl-[acyl-carrier-protein] reductase (NADPH, B-specific) activity; GO:0016628 oxidoreductase activity, acting on the CH-CH group of donors, NAD or NADP as acceptor; GO:0046983 protein dimerization activity; GO:0070402 NADPH binding; GO:0005515 protein binding; GO:0016787 hydrolase activity; GO:0047117 eno…	K00665	FASN; fatty acid synthase, animal type [EC:2.3.1.85]	hsa00061 Fatty acid biosynthesis; hsa01100 Metabolic pathways; hsa01212 Fatty acid metabolism; hsa04152 AMPK signaling pathway; hsa04910 Insulin signaling pathway	IPR016035; IPR020807; IPR013149; IPR020841; IPR011032; IPR020843; IPR013217; IPR013968; IPR016036; IPR032821; IPR029058; IPR014031; IPR029063; IPR014030; IPR014043; IPR020801; IPR016039; IPR020806; IPR023102; IPR016040; IPR009081; IPR001031; IPR001227;	Acyl transferase/acyl hydrolase/lysophospholipase; Polyketide synthase, dehydratase domain; Alcohol dehydrogenase, C-terminal; Polyketide synthase, beta-ketoacyl synthase domain; GroES-like; Polyketide synthase, enoylreductase domain; Methyltransferase type 12; Polyketide synthase, ketoreductase domain; Malonyl-CoA ACP transacylase, ACP-binding; Ketoacyl-synthetase, C-terminal extension; Alpha/Be…
P49327	2449	0.639	Down	0.000163237	K	Fatty acid synthase OS=Homo sapiens OX=9606 GN=FASN PE=1 SV=3	FASN	1	4.31904e-16	118.54	AK(1)TGGAYGEDLGADYNLSQVCDGK	3	-0.48673	2	1.251	1.262	1.326	0.855	0.778	0.821	cytoplasm	GO:0051188 cofactor biosynthetic process; GO:0001649 osteoblast differentiation; GO:0048732 gland development; GO:0016053 organic acid biosynthetic process; GO:0035337 fatty-acyl-CoA metabolic process; GO:0048869 cellular developmental process; GO:0044699 single-organism process; GO:0044255 cellular lipid metabolic process; GO:0009058 biosynthetic process; GO:0071345 cellular response to cytokine…	GO:0097708 intracellular vesicle; GO:0043229 intracellular organelle; GO:0016020 membrane; GO:0044421 extracellular region part; GO:0031410 cytoplasmic vesicle; GO:0071944 cell periphery; GO:0042470 melanosome; GO:0031982 vesicle; GO:0005737 cytoplasm; GO:0012505 endomembrane system; GO:0044424 intracellular part; GO:0005829 cytosol; GO:0005623 cell; GO:0005576 extracellular region; GO:0005739 mi…	GO:0016417 S-acyltransferase activity; GO:1901265 nucleoside phosphate binding; GO:0004319 enoyl-[acyl-carrier-protein] reductase (NADPH, B-specific) activity; GO:0016628 oxidoreductase activity, acting on the CH-CH group of donors, NAD or NADP as acceptor; GO:0046983 protein dimerization activity; GO:0070402 NADPH binding; GO:0005515 protein binding; GO:0016787 hydrolase activity; GO:0047117 eno…	K00665	FASN; fatty acid synthase, animal type [EC:2.3.1.85]	hsa00061 Fatty acid biosynthesis; hsa01100 Metabolic pathways; hsa01212 Fatty acid metabolism; hsa04152 AMPK signaling pathway; hsa04910 Insulin signaling pathway	IPR016035; IPR020807; IPR013149; IPR020841; IPR011032; IPR020843; IPR013217; IPR013968; IPR016036; IPR032821; IPR029058; IPR014031; IPR029063; IPR014030; IPR014043; IPR020801; IPR016039; IPR020806; IPR023102; IPR016040; IPR009081; IPR001031; IPR001227;	Acyl transferase/acyl hydrolase/lysophospholipase; Polyketide synthase, dehydratase domain; Alcohol dehydrogenase, C-terminal; Polyketide synthase, beta-ketoacyl synthase domain; GroES-like; Polyketide synthase, enoylreductase domain; Methyltransferase type 12; Polyketide synthase, ketoreductase domain; Malonyl-CoA ACP transacylase, ACP-binding; Ketoacyl-synthetase, C-terminal extension; Alpha/Be…
P46013	1491	0.29	Down	2.4772e-05	K	Proliferation marker protein Ki-67 OS=Homo sapiens OX=9606 GN=MKI67 PE=1 SV=2	MKI67	1	0.0248988	82.452	TTK(1)IACR	2	-1.0279	1	1.621	1.927	1.681	0.525	0.508	0.481	mitochondria	GO:0031100 animal organ regeneration; GO:0022414 reproductive process; GO:0044699 single-organism process; GO:0010564 regulation of cell cycle process; GO:0044237 cellular metabolic process; GO:0030203 glycosaminoglycan metabolic process; GO:0051783 regulation of nuclear division; GO:0008152 metabolic process; GO:0009408 response to heat; GO:0044702 single organism reproductive process; GO:004317…	GO:0043229 intracellular organelle; GO:0016020 membrane; GO:0043232 intracellular non-membrane-bounded organelle; GO:0044446 intracellular organelle part; GO:0005737 cytoplasm; GO:0031981 nuclear lumen; GO:0044424 intracellular part; GO:0005730 nucleolus; GO:0016604 nuclear body; GO:0005623 cell; GO:0044422 organelle part; GO:0044427 chromosomal part; GO:0043228 non-membrane-bounded organelle; GO…	GO:0003677 DNA binding; GO:0003723 RNA binding; GO:0005524 ATP binding; GO:1901265 nucleoside phosphate binding; GO:0001882 nucleoside binding; GO:0043167 ion binding; GO:0005515 protein binding; GO:0000166 nucleotide binding; GO:1901363 heterocyclic compound binding; GO:0097159 organic cyclic compound binding; GO:0032549 ribonucleoside binding; GO:0097367 carbohydrate derivative binding; GO:0032…	K17582	MKI67; antigen KI-67		IPR008984; IPR000253; IPR029334;	SMAD/FHA domain; Forkhead-associated (FHA) domain; Protein phosphatase 1 binding domain;
P17096	15	0.645	Down	0.000155598	K	High mobility group protein HMG-I/HMG-Y OS=Homo sapiens OX=9606 GN=HMGA1 PE=1 SV=3	HMGA1	1	2.08301e-08	143.25	SSQPLASK(1)QEK	3	-1.125	2	1.219	1.344	1.257	0.827	0.802	0.835	nucleus	GO:0044085 cellular component biogenesis; GO:0019043 establishment of viral latency; GO:0090342 regulation of cell aging; GO:0097659 nucleic acid-templated transcription; GO:0009891 positive regulation of biosynthetic process; GO:0051169 nuclear transport; GO:0044237 cellular metabolic process; GO:0009607 response to biotic stimulus; GO:0008285 negative regulation of cell proliferation; GO:000960…	GO:0030054 cell junction; GO:0005737 cytoplasm; GO:0032991 macromolecular complex; GO:0044424 intracellular part; GO:0005623 cell; GO:0000792 heterochromatin; GO:0044422 organelle part; GO:0044427 chromosomal part; GO:0043228 non-membrane-bounded organelle; GO:0031974 membrane-enclosed lumen; GO:0005654 nucleoplasm; GO:0005925 focal adhesion; GO:0070013 intracellular organelle lumen; GO:0044464 c…	GO:0000981 RNA polymerase II transcription factor activity, sequence-specific DNA binding; GO:0005102 receptor binding; GO:0003690 double-stranded DNA binding; GO:0003705 transcription factor activity, RNA polymerase II distal enhancer sequence-specific binding; GO:0016787 hydrolase activity; GO:0005515 protein binding; GO:0051427 hormone receptor binding; GO:0003682 chromatin binding; GO:0016835…	K09282	HMGA1; high mobility group AT-hook protein 1
P0C0S5	8	2.197	Up	4.9094e-07	K	Histone H2A.Z OS=Homo sapiens OX=9606 GN=H2AZ1 PE=1 SV=2	H2AZ1	1	2.41356e-07	111.64	AGK(1)DSGK(1)AK(1)TK	2	0.79948	12	0.591	0.582	0.583	1.323	1.257	1.278	nucleus	GO:0009891 positive regulation of biosynthetic process; GO:0044699 single-organism process; GO:0051253 negative regulation of RNA metabolic process; GO:2001141 regulation of RNA biosynthetic process; GO:0009893 positive regulation of metabolic process; GO:0051173 positive regulation of nitrogen compound metabolic process; GO:0045944 positive regulation of transcription from RNA polymerase II prom…	GO:0044421 extracellular region part; GO:0031982 vesicle; GO:0032991 macromolecular complex; GO:0044424 intracellular part; GO:0005623 cell; GO:0000792 heterochromatin; GO:0044422 organelle part; GO:0044427 chromosomal part; GO:0043228 non-membrane-bounded organelle; GO:0070062 extracellular exosome; GO:0031974 membrane-enclosed lumen; GO:0070013 intracellular organelle lumen; GO:0044454 nuclear …	GO:0003677 DNA binding; GO:0001158 enhancer sequence-specific DNA binding; GO:0031490 chromatin DNA binding; GO:0046982 protein heterodimerization activity; GO:0000976 transcription regulatory region sequence-specific DNA binding; GO:0003690 double-stranded DNA binding; GO:0044877 macromolecular complex binding; GO:1990837 sequence-specific double-stranded DNA binding; GO:0001012 RNA polymerase I…	K11251	H2A; histone H2A	hsa04217 Necroptosis; hsa05034 Alcoholism; hsa05322 Systemic lupus erythematosus	IPR009072; IPR032454; IPR007125;	Histone-fold; Histone H2A, C-terminal domain; Histone H2A/H2B/H3;
P0C0S5	12	2.225	Up	3.9617e-07	K	Histone H2A.Z OS=Homo sapiens OX=9606 GN=H2AZ1 PE=1 SV=2	H2AZ1	1	2.41356e-07	111.64	AGK(1)DSGK(1)AK(1)TK	2	0.79948	10	0.585	0.579	0.575	1.326	1.264	1.279	nucleus	GO:0009891 positive regulation of biosynthetic process; GO:0044699 single-organism process; GO:0051253 negative regulation of RNA metabolic process; GO:2001141 regulation of RNA biosynthetic process; GO:0009893 positive regulation of metabolic process; GO:0051173 positive regulation of nitrogen compound metabolic process; GO:0045944 positive regulation of transcription from RNA polymerase II prom…	GO:0044421 extracellular region part; GO:0031982 vesicle; GO:0032991 macromolecular complex; GO:0044424 intracellular part; GO:0005623 cell; GO:0000792 heterochromatin; GO:0044422 organelle part; GO:0044427 chromosomal part; GO:0043228 non-membrane-bounded organelle; GO:0070062 extracellular exosome; GO:0031974 membrane-enclosed lumen; GO:0070013 intracellular organelle lumen; GO:0044454 nuclear …	GO:0003677 DNA binding; GO:0001158 enhancer sequence-specific DNA binding; GO:0031490 chromatin DNA binding; GO:0046982 protein heterodimerization activity; GO:0000976 transcription regulatory region sequence-specific DNA binding; GO:0003690 double-stranded DNA binding; GO:0044877 macromolecular complex binding; GO:1990837 sequence-specific double-stranded DNA binding; GO:0001012 RNA polymerase I…	K11251	H2A; histone H2A	hsa04217 Necroptosis; hsa05034 Alcoholism; hsa05322 Systemic lupus erythematosus	IPR009072; IPR032454; IPR007125;	Histone-fold; Histone H2A, C-terminal domain; Histone H2A/H2B/H3;
P0C0S5	14	2.729	Up	2.1717e-06	K	Histone H2A.Z OS=Homo sapiens OX=9606 GN=H2AZ1 PE=1 SV=2	H2AZ1	1	2.41356e-07	106.57	AGK(1)DSGK(1)AK(1)TK	2	0.79948	4	0.511	0.491	0.48	1.402	1.295	1.348	nucleus	GO:0009891 positive regulation of biosynthetic process; GO:0044699 single-organism process; GO:0051253 negative regulation of RNA metabolic process; GO:2001141 regulation of RNA biosynthetic process; GO:0009893 positive regulation of metabolic process; GO:0051173 positive regulation of nitrogen compound metabolic process; GO:0045944 positive regulation of transcription from RNA polymerase II prom…	GO:0044421 extracellular region part; GO:0031982 vesicle; GO:0032991 macromolecular complex; GO:0044424 intracellular part; GO:0005623 cell; GO:0000792 heterochromatin; GO:0044422 organelle part; GO:0044427 chromosomal part; GO:0043228 non-membrane-bounded organelle; GO:0070062 extracellular exosome; GO:0031974 membrane-enclosed lumen; GO:0070013 intracellular organelle lumen; GO:0044454 nuclear …	GO:0003677 DNA binding; GO:0001158 enhancer sequence-specific DNA binding; GO:0031490 chromatin DNA binding; GO:0046982 protein heterodimerization activity; GO:0000976 transcription regulatory region sequence-specific DNA binding; GO:0003690 double-stranded DNA binding; GO:0044877 macromolecular complex binding; GO:1990837 sequence-specific double-stranded DNA binding; GO:0001012 RNA polymerase I…	K11251	H2A; histone H2A	hsa04217 Necroptosis; hsa05034 Alcoholism; hsa05322 Systemic lupus erythematosus	IPR009072; IPR032454; IPR007125;	Histone-fold; Histone H2A, C-terminal domain; Histone H2A/H2B/H3;
P0C0S5	5	1.669	Up	5.8561e-05	K	Histone H2A.Z OS=Homo sapiens OX=9606 GN=H2AZ1 PE=1 SV=2	H2AZ1	1	2.41356e-07	111.64	AGGK(1)AGK(1)DSGK(1)AK(1)TK	2	0.11281	10	0.749	0.714	0.689	1.227	1.164	1.201	nucleus	GO:0009891 positive regulation of biosynthetic process; GO:0044699 single-organism process; GO:0051253 negative regulation of RNA metabolic process; GO:2001141 regulation of RNA biosynthetic process; GO:0009893 positive regulation of metabolic process; GO:0051173 positive regulation of nitrogen compound metabolic process; GO:0045944 positive regulation of transcription from RNA polymerase II prom…	GO:0044421 extracellular region part; GO:0031982 vesicle; GO:0032991 macromolecular complex; GO:0044424 intracellular part; GO:0005623 cell; GO:0000792 heterochromatin; GO:0044422 organelle part; GO:0044427 chromosomal part; GO:0043228 non-membrane-bounded organelle; GO:0070062 extracellular exosome; GO:0031974 membrane-enclosed lumen; GO:0070013 intracellular organelle lumen; GO:0044454 nuclear …	GO:0003677 DNA binding; GO:0001158 enhancer sequence-specific DNA binding; GO:0031490 chromatin DNA binding; GO:0046982 protein heterodimerization activity; GO:0000976 transcription regulatory region sequence-specific DNA binding; GO:0003690 double-stranded DNA binding; GO:0044877 macromolecular complex binding; GO:1990837 sequence-specific double-stranded DNA binding; GO:0001012 RNA polymerase I…	K11251	H2A; histone H2A	hsa04217 Necroptosis; hsa05034 Alcoholism; hsa05322 Systemic lupus erythematosus	IPR009072; IPR032454; IPR007125;	Histone-fold; Histone H2A, C-terminal domain; Histone H2A/H2B/H3;
L0R6Q1	12	1.843	Up	0.00056254	K	SLC35A4 upstream open reading frame protein OS=Homo sapiens OX=9606 GN=SLC35A4 PE=3 SV=1	SLC35A4	1	0.0111062	85.355	LK(1)DLAFLK	2	-0.31419	1	0.685	0.722	0.594	1.218	1.194	1.276	cytoplasm	GO:0050794 regulation of cellular process; GO:0033554 cellular response to stress; GO:0032270 positive regulation of cellular protein metabolic process; GO:0060255 regulation of macromolecule metabolic process; GO:0010608 posttranscriptional regulation of gene expression; GO:0009891 positive regulation of biosynthetic process; GO:0043555 regulation of translation in response to stress; GO:0032056…			K20711	ARHGEF38; Rho guanine nucleotide exchange factor 38
Q8IYS1	24	0.522	Down	1.87608e-05	K	Peptidase M20 domain-containing protein 2 OS=Homo sapiens OX=9606 GN=PM20D2 PE=1 SV=2	PM20D2	1	0.00141861	99.973	SELELLK(1)LR	2	0.90456	1	1.381	1.428	1.404	0.738	0.699	0.762	cytoplasm	GO:0050794 regulation of cellular process; GO:0080090 regulation of primary metabolic process; GO:0060255 regulation of macromolecule metabolic process; GO:0031323 regulation of cellular metabolic process; GO:0044238 primary metabolic process; GO:0071704 organic substance metabolic process; GO:0008152 metabolic process; GO:0050789 regulation of biological process; GO:0032268 regulation of cellula…	GO:0043229 intracellular organelle; GO:0044421 extracellular region part; GO:0044446 intracellular organelle part; GO:0031982 vesicle; GO:0031981 nuclear lumen; GO:0044424 intracellular part; GO:0005623 cell; GO:0005576 extracellular region; GO:0044422 organelle part; GO:0031974 membrane-enclosed lumen; GO:0043226 organelle; GO:0070062 extracellular exosome; GO:0043231 intracellular membrane-boun…	GO:0070011 peptidase activity, acting on L-amino acid peptides; GO:0008233 peptidase activity; GO:0008238 exopeptidase activity; GO:0016787 hydrolase activity; GO:0003824 catalytic activity; GO:0016805 dipeptidase activity;				IPR011650;	Peptidase M20, dimerisation domain;
Q8WW12	152	1.952	Up	1.68205e-05	K	PEST proteolytic signal-containing nuclear protein OS=Homo sapiens OX=9606 GN=PCNP PE=1 SV=2	PCNP	1	1.2012e-05	121.36	GK(1)HGFSDNQK	3	-1.1548	4	0.673	0.625	0.622	1.257	1.255	1.236	cytoplasm	GO:0051603 proteolysis involved in cellular protein catabolic process; GO:0044257 cellular protein catabolic process; GO:0044267 cellular protein metabolic process; GO:0044699 single-organism process; GO:0044237 cellular metabolic process; GO:0010498 proteasomal protein catabolic process; GO:0071704 organic substance metabolic process; GO:0008152 metabolic process; GO:0044248 cellular catabolic p…	GO:0043229 intracellular organelle; GO:0044446 intracellular organelle part; GO:0031981 nuclear lumen; GO:0044424 intracellular part; GO:0016604 nuclear body; GO:0005623 cell; GO:0044422 organelle part; GO:0043231 intracellular membrane-bounded organelle; GO:0043226 organelle; GO:0031974 membrane-enclosed lumen; GO:0005634 nucleus; GO:0005654 nucleoplasm; GO:0070013 intracellular organelle lumen;…	GO:0005515 protein binding; GO:0005488 binding;
Q13813	1630	0.506	Down	5.9223e-05	K	Spectrin alpha chain, non-erythrocytic 1 OS=Homo sapiens OX=9606 GN=SPTAN1 PE=1 SV=3	SPTAN1	1	3.84856e-10	124.12	GACAGSEDAVK(1)AR	3	-0.39358	2	1.487	1.469	1.321	0.722	0.729	0.712	nucleus	GO:0044700 single organism signaling; GO:0065008 regulation of biological quality; GO:0045321 leukocyte activation; GO:0032989 cellular component morphogenesis; GO:0030832 regulation of actin filament length; GO:0044237 cellular metabolic process; GO:0009605 response to external stimulus; GO:0008152 metabolic process; GO:0032535 regulation of cellular component size; GO:0044093 positive regulatio…	GO:0034774 secretory granule lumen; GO:0016020 membrane; GO:1904724 tertiary granule lumen; GO:0044421 extracellular region part; GO:0005938 cell cortex; GO:0031410 cytoplasmic vesicle; GO:0071944 cell periphery; GO:0099568 cytoplasmic region; GO:0005737 cytoplasm; GO:0031982 vesicle; GO:0030863 cortical cytoskeleton; GO:0044433 cytoplasmic vesicle part; GO:0030864 cortical actin cytoskeleton; GO…	GO:0005085 guanyl-nucleotide exchange factor activity; GO:0043167 ion binding; GO:0005515 protein binding; GO:0098772 molecular function regulator; GO:0005516 calmodulin binding; GO:0050839 cell adhesion molecule binding; GO:0008092 cytoskeletal protein binding; GO:0005200 structural constituent of cytoskeleton; GO:0005488 binding; GO:0045296 cadherin binding; GO:0003779 actin binding; GO:0043169…	K06114	SPTA; spectrin alpha	hsa04210 Apoptosis	IPR013315; IPR014837; IPR001452; IPR002048; IPR011992;	Spectrin alpha chain, SH3 domain; EF-hand, Ca insensitive; SH3 domain; EF-hand domain; EF-hand domain pair;
Q13813	1089	0.505	Down	0.0020553	K	Spectrin alpha chain, non-erythrocytic 1 OS=Homo sapiens OX=9606 GN=SPTAN1 PE=1 SV=3	SPTAN1	1	0.00770661	82.287	GMLEK(1)SCK	3	-0.17562	2	1.528	1.358	1.399	0.839	0.614	0.71	nucleus	GO:0044700 single organism signaling; GO:0065008 regulation of biological quality; GO:0045321 leukocyte activation; GO:0032989 cellular component morphogenesis; GO:0030832 regulation of actin filament length; GO:0044237 cellular metabolic process; GO:0009605 response to external stimulus; GO:0008152 metabolic process; GO:0032535 regulation of cellular component size; GO:0044093 positive regulatio…	GO:0034774 secretory granule lumen; GO:0016020 membrane; GO:1904724 tertiary granule lumen; GO:0044421 extracellular region part; GO:0005938 cell cortex; GO:0031410 cytoplasmic vesicle; GO:0071944 cell periphery; GO:0099568 cytoplasmic region; GO:0005737 cytoplasm; GO:0031982 vesicle; GO:0030863 cortical cytoskeleton; GO:0044433 cytoplasmic vesicle part; GO:0030864 cortical actin cytoskeleton; GO…	GO:0005085 guanyl-nucleotide exchange factor activity; GO:0043167 ion binding; GO:0005515 protein binding; GO:0098772 molecular function regulator; GO:0005516 calmodulin binding; GO:0050839 cell adhesion molecule binding; GO:0008092 cytoskeletal protein binding; GO:0005200 structural constituent of cytoskeleton; GO:0005488 binding; GO:0045296 cadherin binding; GO:0003779 actin binding; GO:0043169…	K06114	SPTA; spectrin alpha	hsa04210 Apoptosis	IPR013315; IPR014837; IPR001452; IPR002048; IPR011992;	Spectrin alpha chain, SH3 domain; EF-hand, Ca insensitive; SH3 domain; EF-hand domain; EF-hand domain pair;
Q13813	296	1.717	Up	0.0100175	K	Spectrin alpha chain, non-erythrocytic 1 OS=Homo sapiens OX=9606 GN=SPTAN1 PE=1 SV=3	SPTAN1	1	0.0243338	65.246	K(1)HEGLER	3	1.0588	1	0.744	0.691	0.678	1.258	1.405	0.965	nucleus	GO:0044700 single organism signaling; GO:0065008 regulation of biological quality; GO:0045321 leukocyte activation; GO:0032989 cellular component morphogenesis; GO:0030832 regulation of actin filament length; GO:0044237 cellular metabolic process; GO:0009605 response to external stimulus; GO:0008152 metabolic process; GO:0032535 regulation of cellular component size; GO:0044093 positive regulatio…	GO:0034774 secretory granule lumen; GO:0016020 membrane; GO:1904724 tertiary granule lumen; GO:0044421 extracellular region part; GO:0005938 cell cortex; GO:0031410 cytoplasmic vesicle; GO:0071944 cell periphery; GO:0099568 cytoplasmic region; GO:0005737 cytoplasm; GO:0031982 vesicle; GO:0030863 cortical cytoskeleton; GO:0044433 cytoplasmic vesicle part; GO:0030864 cortical actin cytoskeleton; GO…	GO:0005085 guanyl-nucleotide exchange factor activity; GO:0043167 ion binding; GO:0005515 protein binding; GO:0098772 molecular function regulator; GO:0005516 calmodulin binding; GO:0050839 cell adhesion molecule binding; GO:0008092 cytoskeletal protein binding; GO:0005200 structural constituent of cytoskeleton; GO:0005488 binding; GO:0045296 cadherin binding; GO:0003779 actin binding; GO:0043169…	K06114	SPTA; spectrin alpha	hsa04210 Apoptosis	IPR013315; IPR014837; IPR001452; IPR002048; IPR011992;	Spectrin alpha chain, SH3 domain; EF-hand, Ca insensitive; SH3 domain; EF-hand domain; EF-hand domain pair;
Q16181	208	0.405	Down	1.4162e-07	K	Septin-7 OS=Homo sapiens OX=9606 GN=SEPTIN7 PE=1 SV=2	SEPTIN7	1	6.18208e-46	200.19	ADTLTPEECQQFK(1)K	2	0.48685	5	1.584	1.532	1.557	0.624	0.625	0.642	cytoplasm	GO:0044085 cellular component biogenesis; GO:0065008 regulation of biological quality; GO:0060491 regulation of cell projection assembly; GO:0022414 reproductive process; GO:0048869 cellular developmental process; GO:0007067 mitotic nuclear division; GO:0060271 cilium assembly; GO:0044699 single-organism process; GO:1902115 regulation of organelle assembly; GO:0044782 cilium organization; GO:0051…	GO:0044421 extracellular region part; GO:0099568 cytoplasmic region; GO:0005737 cytoplasm; GO:0032991 macromolecular complex; GO:0097729 9+2 motile cilium; GO:0005623 cell; GO:0032155 cell division site part; GO:0044422 organelle part; GO:0043228 non-membrane-bounded organelle; GO:0070062 extracellular exosome; GO:0000793 condensed chromosome; GO:0005622 intracellular; GO:0043227 membrane-bounded…	GO:1901265 nucleoside phosphate binding; GO:0001882 nucleoside binding; GO:0043167 ion binding; GO:0005515 protein binding; GO:0000166 nucleotide binding; GO:0097159 organic cyclic compound binding; GO:1901363 heterocyclic compound binding; GO:0050839 cell adhesion molecule binding; GO:0032549 ribonucleoside binding; GO:0097367 carbohydrate derivative binding; GO:0042802 identical protein binding…	K16944	SEPT7, CDC3; septin 7	hsa05131 Shigellosis	IPR027417; IPR030379;	P-loop containing nucleoside triphosphate hydrolase; Septin-type guanine nucleotide-binding (G) domain;
Q9NXR1	79	2.652	Up	1.5218e-06	K	Nuclear distribution protein nudE homolog 1 OS=Homo sapiens OX=9606 GN=NDE1 PE=1 SV=3	NDE1	1	0.0414988	56.404	MELETIK(1)EK	2	-1.519	1	0.499	0.53	0.486	1.352	1.333	1.333	cytoplasm,nucleus	GO:0044085 cellular component biogenesis; GO:0000132 establishment of mitotic spindle orientation; GO:0007098 centrosome cycle; GO:0051674 localization of cell; GO:0031109 microtubule polymerization or depolymerization; GO:0007420 brain development; GO:0048869 cellular developmental process; GO:0007067 mitotic nuclear division; GO:0022008 neurogenesis; GO:0060271 cilium assembly; GO:0044699 singl…	GO:0016020 membrane; GO:0005874 microtubule; GO:0005737 cytoplasm; GO:0032991 macromolecular complex; GO:0044424 intracellular part; GO:0099512 supramolecular fiber; GO:0005623 cell; GO:0099080 supramolecular complex; GO:0032155 cell division site part; GO:0000777 condensed chromosome kinetochore; GO:0044422 organelle part; GO:0044427 chromosomal part; GO:0043228 non-membrane-bounded organelle; G…	GO:0008092 cytoskeletal protein binding; GO:0042802 identical protein binding; GO:0008017 microtubule binding; GO:0005488 binding; GO:0015631 tubulin binding; GO:0005515 protein binding; GO:0019904 protein domain specific binding;	K16738	NDE1, NUDE; nuclear distribution protein NudE		IPR006964;	NUDE domain;
Q15365	115	0.41	Down	0.000143537	K	Poly(rC)-binding protein 1 OS=Homo sapiens OX=9606 GN=PCBP1 PE=1 SV=2	PCBP1	1	5.1689e-10	117	LVVPATQCGSLIGK(1)GGCK	3	0.052525	1	1.487	1.646	1.511	0.621	0.582	0.702	cytoskeleton	GO:0019079 viral genome replication; GO:0009891 positive regulation of biosynthetic process; GO:0044764 multi-organism cellular process; GO:0044237 cellular metabolic process; GO:2001141 regulation of RNA biosynthetic process; GO:0008152 metabolic process; GO:0044033 multi-organism metabolic process; GO:0009893 positive regulation of metabolic process; GO:0051173 positive regulation of nitrogen c…	GO:0016020 membrane; GO:0044421 extracellular region part; GO:0031982 vesicle; GO:0000932 P-body; GO:0005737 cytoplasm; GO:0032991 macromolecular complex; GO:0044424 intracellular part; GO:0016604 nuclear body; GO:0005623 cell; GO:0044422 organelle part; GO:0036464 cytoplasmic ribonucleoprotein granule; GO:0043228 non-membrane-bounded organelle; GO:0031974 membrane-enclosed lumen; GO:0070062 extr…	GO:0000981 RNA polymerase II transcription factor activity, sequence-specific DNA binding; GO:0003677 DNA binding; GO:0003723 RNA binding; GO:0098847 sequence-specific single stranded DNA binding; GO:0003697 single-stranded DNA binding; GO:0005515 protein binding; GO:0043565 sequence-specific DNA binding; GO:0003700 transcription factor activity, sequence-specific DNA binding; GO:1901363 heterocy…	K12889	PCBP1; poly(rC)-binding protein 1	hsa03040 Spliceosome; hsa04216 Ferroptosis	IPR004087; IPR004088;	K Homology domain; K Homology domain, type 1;
Q15365	31	1.653	Up	0.0098571	K	Poly(rC)-binding protein 1 OS=Homo sapiens OX=9606 GN=PCBP1 PE=1 SV=2	PCBP1	1	0.00209659	91.658	EVGSIIGK(1)K	2	0.74548	2	0.745	0.741	0.679	1.055	1.447	1.076	cytoskeleton	GO:0019079 viral genome replication; GO:0009891 positive regulation of biosynthetic process; GO:0044764 multi-organism cellular process; GO:0044237 cellular metabolic process; GO:2001141 regulation of RNA biosynthetic process; GO:0008152 metabolic process; GO:0044033 multi-organism metabolic process; GO:0009893 positive regulation of metabolic process; GO:0051173 positive regulation of nitrogen c…	GO:0016020 membrane; GO:0044421 extracellular region part; GO:0031982 vesicle; GO:0000932 P-body; GO:0005737 cytoplasm; GO:0032991 macromolecular complex; GO:0044424 intracellular part; GO:0016604 nuclear body; GO:0005623 cell; GO:0044422 organelle part; GO:0036464 cytoplasmic ribonucleoprotein granule; GO:0043228 non-membrane-bounded organelle; GO:0031974 membrane-enclosed lumen; GO:0070062 extr…	GO:0000981 RNA polymerase II transcription factor activity, sequence-specific DNA binding; GO:0003677 DNA binding; GO:0003723 RNA binding; GO:0098847 sequence-specific single stranded DNA binding; GO:0003697 single-stranded DNA binding; GO:0005515 protein binding; GO:0043565 sequence-specific DNA binding; GO:0003700 transcription factor activity, sequence-specific DNA binding; GO:1901363 heterocy…	K12889	PCBP1; poly(rC)-binding protein 1	hsa03040 Spliceosome; hsa04216 Ferroptosis	IPR004087; IPR004088;	K Homology domain; K Homology domain, type 1;
O60716	448	0.494	Down	1.3007e-06	K	Catenin delta-1 OS=Homo sapiens OX=9606 GN=CTNND1 PE=1 SV=1	CTNND1	1	1.1653e-10	125.47	IAIK(1)NCDGVPALVR	3	1.9491	2	1.454	1.467	1.396	0.71	0.723	0.699	nucleus	GO:0044700 single organism signaling; GO:0044409 entry into host; GO:0009968 negative regulation of signal transduction; GO:0007166 cell surface receptor signaling pathway; GO:0097659 nucleic acid-templated transcription; GO:0007420 brain development; GO:0023051 regulation of signaling; GO:0045216 cell-cell junction organization; GO:0090090 negative regulation of canonical Wnt signaling pathway; …	GO:0030425 dendrite; GO:0016020 membrane; GO:0044421 extracellular region part; GO:0071944 cell periphery; GO:0030054 cell junction; GO:0031982 vesicle; GO:0005737 cytoplasm; GO:0030426 growth cone; GO:0044424 intracellular part; GO:0005913 cell-cell adherens junction; GO:0005911 cell-cell junction; GO:0005623 cell; GO:0043197 dendritic spine; GO:0070062 extracellular exosome; GO:0044309 neuron s…	GO:0050839 cell adhesion molecule binding; GO:0005102 receptor binding; GO:0005488 binding; GO:0045296 cadherin binding; GO:0019901 protein kinase binding; GO:0005515 protein binding; GO:0019900 kinase binding; GO:0019899 enzyme binding;	K05690	CTNND1; catenin (cadherin-associated protein), delta 1	hsa04015 Rap1 signaling pathway; hsa04520 Adherens junction; hsa04670 Leukocyte transendothelial migration	IPR011989; IPR016024;	Armadillo-like helical; Armadillo-type fold;
O60716	846	0.494	Down	1.4922e-06	K	Catenin delta-1 OS=Homo sapiens OX=9606 GN=CTNND1 PE=1 SV=1	CTNND1	1	0.000757674	89.507	K(1)SDFQVNLNNASR	2	4.4664	1	1.431	1.414	1.468	0.7	0.699	0.732	nucleus	GO:0044700 single organism signaling; GO:0044409 entry into host; GO:0009968 negative regulation of signal transduction; GO:0007166 cell surface receptor signaling pathway; GO:0097659 nucleic acid-templated transcription; GO:0007420 brain development; GO:0023051 regulation of signaling; GO:0045216 cell-cell junction organization; GO:0090090 negative regulation of canonical Wnt signaling pathway; …	GO:0030425 dendrite; GO:0016020 membrane; GO:0044421 extracellular region part; GO:0071944 cell periphery; GO:0030054 cell junction; GO:0031982 vesicle; GO:0005737 cytoplasm; GO:0030426 growth cone; GO:0044424 intracellular part; GO:0005913 cell-cell adherens junction; GO:0005911 cell-cell junction; GO:0005623 cell; GO:0043197 dendritic spine; GO:0070062 extracellular exosome; GO:0044309 neuron s…	GO:0050839 cell adhesion molecule binding; GO:0005102 receptor binding; GO:0005488 binding; GO:0045296 cadherin binding; GO:0019901 protein kinase binding; GO:0005515 protein binding; GO:0019900 kinase binding; GO:0019899 enzyme binding;	K05690	CTNND1; catenin (cadherin-associated protein), delta 1	hsa04015 Rap1 signaling pathway; hsa04520 Adherens junction; hsa04670 Leukocyte transendothelial migration	IPR011989; IPR016024;	Armadillo-like helical; Armadillo-type fold;
P49257	463	0.597	Down	7.6305e-07	K	Protein ERGIC-53 OS=Homo sapiens OX=9606 GN=LMAN1 PE=1 SV=2	LMAN1	1	0.00430261	82.417	NMPSNEK(1)PK	3	-0.95461	2	1.335	1.34	1.293	0.787	0.787	0.793	peroxisome	GO:0044085 cellular component biogenesis; GO:0043413 macromolecule glycosylation; GO:0006901 vesicle coating; GO:0010256 endomembrane system organization; GO:0048207 vesicle targeting, rough ER to cis-Golgi; GO:0007596 blood coagulation; GO:0065008 regulation of biological quality; GO:0048208 COPII vesicle coating; GO:0044699 single-organism process; GO:0009058 biosynthetic process; GO:0018196 pe…	GO:0016020 membrane; GO:0044421 extracellular region part; GO:0031090 organelle membrane; GO:0044216 other organism cell; GO:0005737 cytoplasm; GO:0044433 cytoplasmic vesicle part; GO:0099080 supramolecular complex; GO:0005623 cell; GO:0044422 organelle part; GO:0043228 non-membrane-bounded organelle; GO:0043657 host cell; GO:0070062 extracellular exosome; GO:0005622 intracellular; GO:0043227 mem…	GO:0005488 binding; GO:0043167 ion binding; GO:0005537 mannose binding; GO:0046872 metal ion binding; GO:0030246 carbohydrate binding; GO:0043169 cation binding; GO:0005515 protein binding; GO:0051082 unfolded protein binding; GO:0048029 monosaccharide binding; GO:0036094 small molecule binding;	K10080	LMAN1, ERGIC53; lectin, mannose-binding 1	hsa04141 Protein processing in endoplasmic reticulum	IPR005052; IPR013320;	Legume-like lectin; Concanavalin A-like lectin/glucanase domain;
Q14203	77	0.66	Down	2.2783e-05	K	Dynactin subunit 1 OS=Homo sapiens OX=9606 GN=DCTN1 PE=1 SV=3	DCTN1	1	2.21427e-14	143.05	K(1)YFTCDEGHGIFVR	3	0.29115	2	1.261	1.227	1.29	0.83	0.85	0.815	plasma membrane	GO:0044700 single organism signaling; GO:0044085 cellular component biogenesis; GO:0034453 microtubule anchoring; GO:0031116 positive regulation of microtubule polymerization; GO:0060271 cilium assembly; GO:0044782 cilium organization; GO:0051875 pigment granule localization; GO:0035966 response to topologically incorrect protein; GO:0032400 melanosome localization; GO:0044770 cell cycle phase tr…	GO:0016020 membrane; GO:0044450 microtubule organizing center part; GO:0005874 microtubule; GO:0035371 microtubule plus-end; GO:0005737 cytoplasm; GO:0032991 macromolecular complex; GO:0005869 dynactin complex; GO:1990752 microtubule end; GO:0044424 intracellular part; GO:0099512 supramolecular fiber; GO:0005623 cell; GO:0099080 supramolecular complex; GO:0044422 organelle part; GO:0044427 chromo…	GO:0070840 dynein complex binding; GO:0003774 motor activity; GO:0044877 macromolecular complex binding; GO:0015631 tubulin binding; GO:0016817 hydrolase activity, acting on acid anhydrides; GO:0016787 hydrolase activity; GO:0005515 protein binding; GO:0017111 nucleoside-triphosphatase activity; GO:0016462 pyrophosphatase activity; GO:0008092 cytoskeletal protein binding; GO:0003824 catalytic act…	K04648	DCTN1; dynactin 1	hsa04962 Vasopressin-regulated water reabsorption; hsa05016 Huntington disease	IPR000938; IPR022157;	CAP Gly-rich domain; Dynein associated protein;
Q8IY81	233	0.65	Down	0.0002441	K	pre-rRNA 2'-O-ribose RNA methyltransferase FTSJ3 OS=Homo sapiens OX=9606 GN=FTSJ3 PE=1 SV=2	FTSJ3	1	0.000542267	115.57	TVTELVTK(1)K	3	0.017308	2	1.295	1.261	1.248	0.788	0.807	0.879	nucleus	GO:0044085 cellular component biogenesis; GO:0022613 ribonucleoprotein complex biogenesis; GO:0006725 cellular aromatic compound metabolic process; GO:0000154 rRNA modification; GO:0009451 RNA modification; GO:0044237 cellular metabolic process; GO:0032259 methylation; GO:0071704 organic substance metabolic process; GO:0008152 metabolic process; GO:0046483 heterocycle metabolic process; GO:000613…	GO:0043229 intracellular organelle; GO:0043232 intracellular non-membrane-bounded organelle; GO:0044446 intracellular organelle part; GO:0031981 nuclear lumen; GO:0044424 intracellular part; GO:0005730 nucleolus; GO:0005623 cell; GO:0044422 organelle part; GO:0043228 non-membrane-bounded organelle; GO:0043231 intracellular membrane-bounded organelle; GO:0043226 organelle; GO:0031974 membrane-encl…	GO:0097159 organic cyclic compound binding; GO:1901363 heterocyclic compound binding; GO:0008757 S-adenosylmethionine-dependent methyltransferase activity; GO:0003723 RNA binding; GO:0008168 methyltransferase activity; GO:0008173 RNA methyltransferase activity; GO:0003824 catalytic activity; GO:0005488 binding; GO:0003676 nucleic acid binding; GO:0016741 transferase activity, transferring one-car…	K14857	SPB1, FTSJ3; AdoMet-dependent rRNA methyltransferase SPB1 [EC:2.1.1.-]		IPR024576; IPR012920; IPR029063; IPR002877;	Ribosomal RNA methyltransferase Spb1, domain of unknown function DUF3381; Ribosomal RNA methyltransferase, Spb1, C-terminal; S-adenosyl-L-methionine-dependent methyltransferase; Ribosomal RNA methyltransferase FtsJ domain;
Q14160	19	0.607	Down	0.0050796	K	Protein scribble homolog OS=Homo sapiens OX=9606 GN=SCRIB PE=1 SV=4	SCRIB	1	0.0242747	56.258	HVESVDK(1)R	3	1.6165	1	1.369	1.34	1.22	0.675	0.813	0.897	nucleus	GO:0044700 single organism signaling; GO:0046710 GDP metabolic process; GO:0010941 regulation of cell death; GO:0048732 gland development; GO:0035148 tube formation; GO:0043009 chordate embryonic development; GO:0044237 cellular metabolic process; GO:0035315 hair cell differentiation; GO:0009913 epidermal cell differentiation; GO:0099003 vesicle-mediated transport in synapse; GO:0008152 metabolic…	GO:0016323 basolateral plasma membrane; GO:0016020 membrane; GO:0044421 extracellular region part; GO:0044291 cell-cell contact zone; GO:0030054 cell junction; GO:0071944 cell periphery; GO:0031982 vesicle; GO:0005737 cytoplasm; GO:0032991 macromolecular complex; GO:0035748 myelin sheath abaxonal region; GO:0044424 intracellular part; GO:0005913 cell-cell adherens junction; GO:0005911 cell-cell j…	GO:0035254 glutamate receptor binding; GO:0050839 cell adhesion molecule binding; GO:0016301 kinase activity; GO:0003824 catalytic activity; GO:0005102 receptor binding; GO:0004385 guanylate kinase activity; GO:0005488 binding; GO:0019205 nucleobase-containing compound kinase activity; GO:0045296 cadherin binding; GO:0005515 protein binding; GO:0035255 ionotropic glutamate receptor binding; GO:00…	K16175	SCRIB; protein scribble	hsa04390 Hippo signaling pathway; hsa04530 Tight junction; hsa05165 Human papillomavirus infection; hsa05203 Viral carcinogenesis	IPR001478; IPR032675;	PDZ domain; Leucine-rich repeat domain, L domain-like;
Q63HN8	2628	0.479	Down	1.53871e-05	K	E3 ubiquitin-protein ligase RNF213 OS=Homo sapiens OX=9606 GN=RNF213 PE=1 SV=3	RNF213	1	6.62398e-05	103.66	K(1)TEDECSFVSLR	2	0.3945	1	1.498	1.402	1.474	0.703	0.674	0.717	plasma membrane	GO:0044085 cellular component biogenesis; GO:0009968 negative regulation of signal transduction; GO:0001568 blood vessel development; GO:0023051 regulation of signaling; GO:0044699 single-organism process; GO:2000050 regulation of non-canonical Wnt signaling pathway; GO:0051865 protein autoubiquitination; GO:0044237 cellular metabolic process; GO:0001525 angiogenesis; GO:0008152 metabolic process…	GO:0043229 intracellular organelle; GO:0016020 membrane; GO:0043232 intracellular non-membrane-bounded organelle; GO:0044446 intracellular organelle part; GO:0005737 cytoplasm; GO:0031981 nuclear lumen; GO:0044424 intracellular part; GO:0005730 nucleolus; GO:0005829 cytosol; GO:0005623 cell; GO:0044422 organelle part; GO:0043228 non-membrane-bounded organelle; GO:0031974 membrane-enclosed lumen; …	GO:0019787 ubiquitin-like protein transferase activity; GO:0043167 ion binding; GO:0016817 hydrolase activity, acting on acid anhydrides; GO:0016787 hydrolase activity; GO:0005515 protein binding; GO:0017111 nucleoside-triphosphatase activity; GO:0008270 zinc ion binding; GO:0016887 ATPase activity; GO:0016462 pyrophosphatase activity; GO:0046914 transition metal ion binding; GO:0003824 catalytic…	K22754			IPR003593; IPR001841; IPR018957; IPR013083; IPR027417;	AAA+ ATPase domain; Zinc finger, RING-type; Zinc finger, C3HC4 RING-type; Zinc finger, RING/FYVE/PHD-type; P-loop containing nucleoside triphosphate hydrolase;
Q63HN8	316	0.377	Down	0.000142483	K	E3 ubiquitin-protein ligase RNF213 OS=Homo sapiens OX=9606 GN=RNF213 PE=1 SV=3	RNF213	1	0.000318715	87.641	THCQEAETK(1)TK	3	-0.3052	1	1.645	1.616	1.542	0.682	0.587	0.544	plasma membrane	GO:0044085 cellular component biogenesis; GO:0009968 negative regulation of signal transduction; GO:0001568 blood vessel development; GO:0023051 regulation of signaling; GO:0044699 single-organism process; GO:2000050 regulation of non-canonical Wnt signaling pathway; GO:0051865 protein autoubiquitination; GO:0044237 cellular metabolic process; GO:0001525 angiogenesis; GO:0008152 metabolic process…	GO:0043229 intracellular organelle; GO:0016020 membrane; GO:0043232 intracellular non-membrane-bounded organelle; GO:0044446 intracellular organelle part; GO:0005737 cytoplasm; GO:0031981 nuclear lumen; GO:0044424 intracellular part; GO:0005730 nucleolus; GO:0005829 cytosol; GO:0005623 cell; GO:0044422 organelle part; GO:0043228 non-membrane-bounded organelle; GO:0031974 membrane-enclosed lumen; …	GO:0019787 ubiquitin-like protein transferase activity; GO:0043167 ion binding; GO:0016817 hydrolase activity, acting on acid anhydrides; GO:0016787 hydrolase activity; GO:0005515 protein binding; GO:0017111 nucleoside-triphosphatase activity; GO:0008270 zinc ion binding; GO:0016887 ATPase activity; GO:0016462 pyrophosphatase activity; GO:0046914 transition metal ion binding; GO:0003824 catalytic…	K22754			IPR003593; IPR001841; IPR018957; IPR013083; IPR027417;	AAA+ ATPase domain; Zinc finger, RING-type; Zinc finger, C3HC4 RING-type; Zinc finger, RING/FYVE/PHD-type; P-loop containing nucleoside triphosphate hydrolase;
P16144	834	0.349	Down	1.481e-06	K	Integrin beta-4 OS=Homo sapiens OX=9606 GN=ITGB4 PE=1 SV=5	ITGB4	1	1.56452e-06	115.12	LCTENLLK(1)PDTR	3	-0.48166	2	1.603	1.662	1.661	0.6	0.55	0.57	extracellular,plasma membrane	GO:0044085 cellular component biogenesis; GO:0044700 single organism signaling; GO:0051674 localization of cell; GO:0007166 cell surface receptor signaling pathway; GO:0048869 cellular developmental process; GO:0044699 single-organism process; GO:0006914 autophagy; GO:0044237 cellular metabolic process; GO:0009611 response to wounding; GO:0022610 biological adhesion; GO:0048729 tissue morphogenes…	GO:0016020 membrane; GO:0044421 extracellular region part; GO:0098636 protein complex involved in cell adhesion; GO:0071944 cell periphery; GO:0098796 membrane protein complex; GO:0030054 cell junction; GO:0031982 vesicle; GO:0031224 intrinsic component of membrane; GO:0032991 macromolecular complex; GO:0044424 intracellular part; GO:0005887 integral component of plasma membrane; GO:0005623 cell;…	GO:0001664 G-protein coupled receptor binding; GO:0060089 molecular transducer activity; GO:0005515 protein binding; GO:0004872 receptor activity; GO:0005102 receptor binding; GO:0005488 binding;	K06525	ITGB4, CD104; integrin beta 4	hsa04151 PI3K-Akt signaling pathway; hsa04510 Focal adhesion; hsa04512 ECM-receptor interaction; hsa04810 Regulation of actin cytoskeleton; hsa05165 Human papillomavirus infection; hsa05410 Hypertrophic cardiomyopathy (HCM); hsa05412 Arrhythmogenic right ventricular cardiomyopathy (ARVC); hsa05414 Dilated cardiomyopathy (DCM)	IPR033760; IPR002369; IPR016201; IPR012896; IPR003961; IPR013111; IPR013783; IPR003644; IPR002035;	Integrin beta N-terminal; Integrin beta subunit, VWA domain; PSI domain; Integrin beta subunit, tail; Fibronectin type III; EGF-like domain, extracellular; Immunoglobulin-like fold; Na-Ca exchanger/integrin-beta4; von Willebrand factor, type A;
P31040	250	1.834	Up	3.6211e-05	K	Succinate dehydrogenase [ubiquinone] flavoprotein subunit, mitochondrial OS=Homo sapiens OX=9606 GN=SDHA PE=1 SV=2	SDHA	1	4.99908e-10	121.48	AK(1)NTVVATGGYGR	2	-0.32717	1	0.651	0.652	0.705	1.211	1.212	1.26	mitochondria	GO:0009116 nucleoside metabolic process; GO:0042278 purine nucleoside metabolic process; GO:0009167 purine ribonucleoside monophosphate metabolic process; GO:0009117 nucleotide metabolic process; GO:0044699 single-organism process; GO:0009061 anaerobic respiration; GO:0044237 cellular metabolic process; GO:0006796 phosphate-containing compound metabolic process; GO:0008152 metabolic process; GO:0…	GO:0016020 membrane; GO:0098800 inner mitochondrial membrane protein complex; GO:0031090 organelle membrane; GO:0098796 membrane protein complex; GO:0005737 cytoplasm; GO:0032991 macromolecular complex; GO:0045281 succinate dehydrogenase complex; GO:0098798 mitochondrial protein complex; GO:0044424 intracellular part; GO:0005623 cell; GO:0044455 mitochondrial membrane part; GO:0044422 organelle p…	GO:1901265 nucleoside phosphate binding; GO:0050660 flavin adenine dinucleotide binding; GO:0043167 ion binding; GO:0000104 succinate dehydrogenase activity; GO:0005515 protein binding; GO:0000166 nucleotide binding; GO:0048037 cofactor binding; GO:0016491 oxidoreductase activity; GO:0016627 oxidoreductase activity, acting on the CH-CH group of donors; GO:1901363 heterocyclic compound binding; GO…	K00234	SDHA, SDH1; succinate dehydrogenase (ubiquinone) flavoprotein subunit [EC:1.3.5.1]	hsa00020 Citrate cycle (TCA cycle); hsa00190 Oxidative phosphorylation; hsa01100 Metabolic pathways; hsa01200 Carbon metabolism; hsa04714 Thermogenesis; hsa04932 Non-alcoholic fatty liver disease (NAFLD); hsa05010 Alzheimer disease; hsa05012 Parkinson disease; hsa05016 Huntington disease	IPR027477; IPR003953; IPR015939; IPR023753;	Succinate dehydrogenase/fumarate reductase flavoprotein, catalytic domain; FAD-dependent oxidoreductase 2, FAD binding domain; Fumarate reductase/succinate dehydrogenase flavoprotein-like, C-terminal; FAD/NAD(P)-binding domain;
P17174	97	1.571	Up	0.0062823	K	Aspartate aminotransferase, cytoplasmic OS=Homo sapiens OX=9606 GN=GOT1 PE=1 SV=3	GOT1	1	0.000526115	69.03	LALGDDSPALK(1)EK	3	4.0464	1	0.768	0.717	0.76	1.092	1.374	1.06	cytoplasm	GO:0044700 single organism signaling; GO:0019550 glutamate catabolic process to aspartate; GO:1901606 alpha-amino acid catabolic process; GO:0065008 regulation of biological quality; GO:0019319 hexose biosynthetic process; GO:0016053 organic acid biosynthetic process; GO:0007166 cell surface receptor signaling pathway; GO:0006066 alcohol metabolic process; GO:0044699 single-organism process; GO:0…	GO:0044421 extracellular region part; GO:0031982 vesicle; GO:0005737 cytoplasm; GO:0044424 intracellular part; GO:0005623 cell; GO:0044422 organelle part; GO:0043679 axon terminus; GO:0031974 membrane-enclosed lumen; GO:0070062 extracellular exosome; GO:0005654 nucleoplasm; GO:0070013 intracellular organelle lumen; GO:0005622 intracellular; GO:0044464 cell part; GO:0098793 presynapse; GO:0005764 …	GO:0016769 transferase activity, transferring nitrogenous groups; GO:0047801 L-cysteine:2-oxoglutarate aminotransferase activity; GO:0043167 ion binding; GO:0043177 organic acid binding; GO:0016829 lyase activity; GO:0048037 cofactor binding; GO:0030170 pyridoxal phosphate binding; GO:1901363 heterocyclic compound binding; GO:0097159 organic cyclic compound binding; GO:0031406 carboxylic acid bin…	K14454	GOT1; aspartate aminotransferase, cytoplasmic [EC:2.6.1.1]	hsa00220 Arginine biosynthesis; hsa00250 Alanine, aspartate and glutamate metabolism; hsa00270 Cysteine and methionine metabolism; hsa00330 Arginine and proline metabolism; hsa00350 Tyrosine metabolism; hsa00360 Phenylalanine metabolism; hsa00400 Phenylalanine, tyrosine and tryptophan biosynthesis; hsa01100 Metabolic pathways; hsa01200 Carbon metabolism; hsa01210 2-Oxocarboxylic acid metabolism; …	IPR004839; IPR015424; IPR015421;	Aminotransferase, class I/classII; Pyridoxal phosphate-dependent transferase; Pyridoxal phosphate-dependent transferase, major region, subdomain 1;
O76054	257	0.636	Down	0.00067748	K	SEC14-like protein 2 OS=Homo sapiens OX=9606 GN=SEC14L2 PE=1 SV=1	SEC14L2	1	0.00231369	80.96	SK(1)INYGGDIPR	2	-0.60768	1	1.226	1.262	1.362	0.874	0.778	0.795	cytoplasm	GO:0097659 nucleic acid-templated transcription; GO:0009891 positive regulation of biosynthetic process; GO:0009058 biosynthetic process; GO:0019216 regulation of lipid metabolic process; GO:0044237 cellular metabolic process; GO:0051234 establishment of localization; GO:2001141 regulation of RNA biosynthetic process; GO:0008152 metabolic process; GO:0050810 regulation of steroid biosynthetic pro…	GO:0016020 membrane; GO:0043229 intracellular organelle; GO:0044421 extracellular region part; GO:0005737 cytoplasm; GO:0031982 vesicle; GO:0031224 intrinsic component of membrane; GO:0044424 intracellular part; GO:0005829 cytosol; GO:0005623 cell; GO:0016021 integral component of membrane; GO:0005576 extracellular region; GO:0043226 organelle; GO:0070062 extracellular exosome; GO:0043231 intrace…	GO:0097159 organic cyclic compound binding; GO:1901363 heterocyclic compound binding; GO:0019842 vitamin binding; GO:0005488 binding; GO:0005543 phospholipid binding; GO:0043167 ion binding; GO:0008289 lipid binding; GO:0008431 vitamin E binding; GO:0043168 anion binding; GO:0005215 transporter activity; GO:0036094 small molecule binding;				IPR001251; IPR009038; IPR011074;	CRAL-TRIO lipid binding domain; GOLD domain; CRAL/TRIO, N-terminal domain;
Q9BXP5	413	0.638	Down	0.0033957	K	Serrate RNA effector molecule homolog OS=Homo sapiens OX=9606 GN=SRRT PE=1 SV=1	SRRT	1	0.00022499	94.767	DAAGLECK(1)PR	2	-0.55895	2	1.175	1.306	1.358	0.797	0.908	0.745	nucleus	GO:0010608 posttranscriptional regulation of gene expression; GO:0097659 nucleic acid-templated transcription; GO:0046685 response to arsenic-containing substance; GO:0044237 cellular metabolic process; GO:0008152 metabolic process; GO:0051240 positive regulation of multicellular organismal process; GO:0010558 negative regulation of macromolecule biosynthetic process; GO:0043170 macromolecule met…	GO:0043229 intracellular organelle; GO:0044446 intracellular organelle part; GO:0005737 cytoplasm; GO:0031981 nuclear lumen; GO:0044424 intracellular part; GO:0005623 cell; GO:0044422 organelle part; GO:0043231 intracellular membrane-bounded organelle; GO:0043226 organelle; GO:0031974 membrane-enclosed lumen; GO:0005634 nucleus; GO:0005654 nucleoplasm; GO:0070013 intracellular organelle lumen; GO…	GO:0097159 organic cyclic compound binding; GO:1901363 heterocyclic compound binding; GO:0003677 DNA binding; GO:0003723 RNA binding; GO:0005515 protein binding; GO:0005488 binding; GO:0003676 nucleic acid binding;				IPR007042; IPR000504;	Arsenite-resistance protein 2; RNA recognition motif domain;
Q9BXP5	710	0.391	Down	2.1094e-06	K	Serrate RNA effector molecule homolog OS=Homo sapiens OX=9606 GN=SRRT PE=1 SV=1	SRRT	1	2.74936e-17	154.69	FVTSNTQELGK(1)DK	2	0.10858	1	1.62	1.557	1.559	0.589	0.622	0.639	nucleus	GO:0010608 posttranscriptional regulation of gene expression; GO:0097659 nucleic acid-templated transcription; GO:0046685 response to arsenic-containing substance; GO:0044237 cellular metabolic process; GO:0008152 metabolic process; GO:0051240 positive regulation of multicellular organismal process; GO:0010558 negative regulation of macromolecule biosynthetic process; GO:0043170 macromolecule met…	GO:0043229 intracellular organelle; GO:0044446 intracellular organelle part; GO:0005737 cytoplasm; GO:0031981 nuclear lumen; GO:0044424 intracellular part; GO:0005623 cell; GO:0044422 organelle part; GO:0043231 intracellular membrane-bounded organelle; GO:0043226 organelle; GO:0031974 membrane-enclosed lumen; GO:0005634 nucleus; GO:0005654 nucleoplasm; GO:0070013 intracellular organelle lumen; GO…	GO:0097159 organic cyclic compound binding; GO:1901363 heterocyclic compound binding; GO:0003677 DNA binding; GO:0003723 RNA binding; GO:0005515 protein binding; GO:0005488 binding; GO:0003676 nucleic acid binding;				IPR007042; IPR000504;	Arsenite-resistance protein 2; RNA recognition motif domain;
Q9BXP5	712	0.36	Down	0.00016368	K	Serrate RNA effector molecule homolog OS=Homo sapiens OX=9606 GN=SRRT PE=1 SV=1	SRRT	1	0.0177346	49.632	DK(1)WLCPLSGK	3	3.8978	1	1.777	1.693	1.411	0.562	0.613	0.582	nucleus	GO:0010608 posttranscriptional regulation of gene expression; GO:0097659 nucleic acid-templated transcription; GO:0046685 response to arsenic-containing substance; GO:0044237 cellular metabolic process; GO:0008152 metabolic process; GO:0051240 positive regulation of multicellular organismal process; GO:0010558 negative regulation of macromolecule biosynthetic process; GO:0043170 macromolecule met…	GO:0043229 intracellular organelle; GO:0044446 intracellular organelle part; GO:0005737 cytoplasm; GO:0031981 nuclear lumen; GO:0044424 intracellular part; GO:0005623 cell; GO:0044422 organelle part; GO:0043231 intracellular membrane-bounded organelle; GO:0043226 organelle; GO:0031974 membrane-enclosed lumen; GO:0005634 nucleus; GO:0005654 nucleoplasm; GO:0070013 intracellular organelle lumen; GO…	GO:0097159 organic cyclic compound binding; GO:1901363 heterocyclic compound binding; GO:0003677 DNA binding; GO:0003723 RNA binding; GO:0005515 protein binding; GO:0005488 binding; GO:0003676 nucleic acid binding;				IPR007042; IPR000504;	Arsenite-resistance protein 2; RNA recognition motif domain;
Q7Z4S6	1148	0.576	Down	3.6518e-05	K	Kinesin-like protein KIF21A OS=Homo sapiens OX=9606 GN=KIF21A PE=1 SV=2	KIF21A	1	0.0433178	65.224	LCGEVK(1)PK	2	0.17578	1	1.351	1.353	1.33	0.804	0.736	0.784	nucleus	GO:0044763 single-organism cellular process; GO:0007018 microtubule-based movement; GO:0006928 movement of cell or subcellular component; GO:0044699 single-organism process; GO:0009987 cellular process; GO:0007017 microtubule-based process;	GO:0043229 intracellular organelle; GO:0099513 polymeric cytoskeletal fiber; GO:0005874 microtubule; GO:0043232 intracellular non-membrane-bounded organelle; GO:0044430 cytoskeletal part; GO:0005737 cytoplasm; GO:0044446 intracellular organelle part; GO:0032991 macromolecular complex; GO:0099512 supramolecular fiber; GO:0044424 intracellular part; GO:0005875 microtubule associated complex; GO:009…	GO:0003774 motor activity; GO:1901265 nucleoside phosphate binding; GO:0016817 hydrolase activity, acting on acid anhydrides; GO:0016787 hydrolase activity; GO:0005515 protein binding; GO:0016887 ATPase activity; GO:0097159 organic cyclic compound binding; GO:1901363 heterocyclic compound binding; GO:0016462 pyrophosphatase activity; GO:0008092 cytoskeletal protein binding; GO:0003824 catalytic a…	K10395	KIF4_21_27; kinesin family member 4/21/27		IPR017986; IPR015943; IPR027417; IPR001752;	WD40-repeat-containing domain; WD40/YVTN repeat-like-containing domain; P-loop containing nucleoside triphosphate hydrolase; Kinesin motor domain;
Q99460	146	0.512	Down	4.1955e-05	K	26S proteasome non-ATPase regulatory subunit 1 OS=Homo sapiens OX=9606 GN=PSMD1 PE=1 SV=2	PSMD1	1	0.00226986	89.355	CLDDHK(1)YK	3	-0.61566	1	1.408	1.366	1.477	0.703	0.764	0.708	cytoplasm	GO:0044700 single organism signaling; GO:0010608 posttranscriptional regulation of gene expression; GO:0051443 positive regulation of ubiquitin-protein transferase activity; GO:0031347 regulation of defense response; GO:0010564 regulation of cell cycle process; GO:0044237 cellular metabolic process; GO:1903364 positive regulation of cellular protein catabolic process; GO:0008152 metabolic process…	GO:0034774 secretory granule lumen; GO:0016020 membrane; GO:0044421 extracellular region part; GO:0031410 cytoplasmic vesicle; GO:0005838 proteasome regulatory particle; GO:0005737 cytoplasm; GO:0031982 vesicle; GO:0044433 cytoplasmic vesicle part; GO:0032991 macromolecular complex; GO:0044424 intracellular part; GO:0035578 azurophil granule lumen; GO:0005623 cell; GO:0044422 organelle part; GO:0…	GO:0030234 enzyme regulator activity; GO:0098772 molecular function regulator; GO:0005488 binding;	K03032	PSMD1, RPN2; 26S proteasome regulatory subunit N2	hsa03050 Proteasome; hsa05169 Epstein-Barr virus infection	IPR011989; IPR016024;	Armadillo-like helical; Armadillo-type fold;
Q99460	803	0.27	Down	6.2804e-07	K	26S proteasome non-ATPase regulatory subunit 1 OS=Homo sapiens OX=9606 GN=PSMD1 PE=1 SV=2	PSMD1	1	0.00310268	107.79	VQYK(1)SNCK	2	0.97742	1	1.725	1.781	1.835	0.501	0.47	0.469	cytoplasm	GO:0044700 single organism signaling; GO:0010608 posttranscriptional regulation of gene expression; GO:0051443 positive regulation of ubiquitin-protein transferase activity; GO:0031347 regulation of defense response; GO:0010564 regulation of cell cycle process; GO:0044237 cellular metabolic process; GO:1903364 positive regulation of cellular protein catabolic process; GO:0008152 metabolic process…	GO:0034774 secretory granule lumen; GO:0016020 membrane; GO:0044421 extracellular region part; GO:0031410 cytoplasmic vesicle; GO:0005838 proteasome regulatory particle; GO:0005737 cytoplasm; GO:0031982 vesicle; GO:0044433 cytoplasmic vesicle part; GO:0032991 macromolecular complex; GO:0044424 intracellular part; GO:0035578 azurophil granule lumen; GO:0005623 cell; GO:0044422 organelle part; GO:0…	GO:0030234 enzyme regulator activity; GO:0098772 molecular function regulator; GO:0005488 binding;	K03032	PSMD1, RPN2; 26S proteasome regulatory subunit N2	hsa03050 Proteasome; hsa05169 Epstein-Barr virus infection	IPR011989; IPR016024;	Armadillo-like helical; Armadillo-type fold;
O95249	124	1.633	Up	0.0022039	K	Golgi SNAP receptor complex member 1 OS=Homo sapiens OX=9606 GN=GOSR1 PE=1 SV=1	GOSR1	1	2.93662e-06	104.95	DILQDYTHEFHK(1)TK	4	0.62103	1	0.768	0.648	0.771	1.278	1.109	1.185	cytoplasm	GO:0050794 regulation of cellular process; GO:0060627 regulation of vesicle-mediated transport; GO:0016043 cellular component organization; GO:0090174 organelle membrane fusion; GO:0046907 intracellular transport; GO:0044699 single-organism process; GO:0048193 Golgi vesicle transport; GO:0015031 protein transport; GO:0060341 regulation of cellular localization; GO:0051234 establishment of localiz…	GO:0016020 membrane; GO:0031410 cytoplasmic vesicle; GO:0031090 organelle membrane; GO:0098796 membrane protein complex; GO:0031982 vesicle; GO:0005737 cytoplasm; GO:0005801 cis-Golgi network; GO:0005797 Golgi medial cisterna; GO:0032991 macromolecular complex; GO:0031224 intrinsic component of membrane; GO:0044424 intracellular part; GO:0005623 cell; GO:0044422 organelle part; GO:0044425 membran…	GO:0000149 SNARE binding; GO:0005484 SNAP receptor activity; GO:0005515 protein binding; GO:0005488 binding;	K08495	GOSR1, GOS1; golgi SNAP receptor complex member 1	hsa04130 SNARE interactions in vesicular transport
P61247	115	0.399	Down	4.0891e-05	K	40S ribosomal protein S3a OS=Homo sapiens OX=9606 GN=RPS3A PE=1 SV=2	RPS3A	1	0.0142447	93.374	MCSMVK(1)K	2	0.47397	1	1.672	1.489	1.54	0.615	0.596	0.665	nucleus	GO:0044085 cellular component biogenesis; GO:0022613 ribonucleoprotein complex biogenesis; GO:0010941 regulation of cell death; GO:0072594 establishment of protein localization to organelle; GO:0006518 peptide metabolic process; GO:0048869 cellular developmental process; GO:0044699 single-organism process; GO:0009058 biosynthetic process; GO:0044764 multi-organism cellular process; GO:0044237 cel…	GO:0044421 extracellular region part; GO:0005783 endoplasmic reticulum; GO:0030054 cell junction; GO:0015935 small ribosomal subunit; GO:0031982 vesicle; GO:0005737 cytoplasm; GO:0032991 macromolecular complex; GO:0044424 intracellular part; GO:0005623 cell; GO:0044422 organelle part; GO:0043228 non-membrane-bounded organelle; GO:0070062 extracellular exosome; GO:0031974 membrane-enclosed lumen; …	GO:0097159 organic cyclic compound binding; GO:1901363 heterocyclic compound binding; GO:0003723 RNA binding; GO:0005488 binding; GO:0003676 nucleic acid binding; GO:0005515 protein binding; GO:0005198 structural molecule activity; GO:0003735 structural constituent of ribosome;	K02984	RP-S3Ae, RPS3A; small subunit ribosomal protein S3Ae	hsa03010 Ribosome
P61247	195	0.579	Down	0.00179808	K	40S ribosomal protein S3a OS=Homo sapiens OX=9606 GN=RPS3A PE=1 SV=2	RPS3A	1	3.59959e-07	119.96	LIPDSIGK(1)DIEK	2	-1.0771	2	1.495	1.212	1.321	0.739	0.843	0.75	nucleus	GO:0044085 cellular component biogenesis; GO:0022613 ribonucleoprotein complex biogenesis; GO:0010941 regulation of cell death; GO:0072594 establishment of protein localization to organelle; GO:0006518 peptide metabolic process; GO:0048869 cellular developmental process; GO:0044699 single-organism process; GO:0009058 biosynthetic process; GO:0044764 multi-organism cellular process; GO:0044237 cel…	GO:0044421 extracellular region part; GO:0005783 endoplasmic reticulum; GO:0030054 cell junction; GO:0015935 small ribosomal subunit; GO:0031982 vesicle; GO:0005737 cytoplasm; GO:0032991 macromolecular complex; GO:0044424 intracellular part; GO:0005623 cell; GO:0044422 organelle part; GO:0043228 non-membrane-bounded organelle; GO:0070062 extracellular exosome; GO:0031974 membrane-enclosed lumen; …	GO:0097159 organic cyclic compound binding; GO:1901363 heterocyclic compound binding; GO:0003723 RNA binding; GO:0005488 binding; GO:0003676 nucleic acid binding; GO:0005515 protein binding; GO:0005198 structural molecule activity; GO:0003735 structural constituent of ribosome;	K02984	RP-S3Ae, RPS3A; small subunit ribosomal protein S3Ae	hsa03010 Ribosome
O14757	53	0.504	Down	2.4938e-05	K	Serine/threonine-protein kinase Chk1 OS=Homo sapiens OX=9606 GN=CHEK1 PE=1 SV=2	CHEK1	1	0.000367894	107.06	AVDCPENIK(1)K	2	-0.18789	1	1.351	1.44	1.483	0.713	0.7	0.742	cytoplasm	GO:0044700 single organism signaling; GO:0034644 cellular response to UV; GO:0009891 positive regulation of biosynthetic process; GO:0010564 regulation of cell cycle process; GO:0044237 cellular metabolic process; GO:0009605 response to external stimulus; GO:0008152 metabolic process; GO:0051784 negative regulation of nuclear division; GO:0051493 regulation of cytoskeleton organization; GO:001953…	GO:0005615 extracellular space; GO:0044421 extracellular region part; GO:0005737 cytoplasm; GO:0044424 intracellular part; GO:0005623 cell; GO:0044422 organelle part; GO:0044427 chromosomal part; GO:0043228 non-membrane-bounded organelle; GO:0000793 condensed chromosome; GO:0031974 membrane-enclosed lumen; GO:0005856 cytoskeleton; GO:0005815 microtubule organizing center; GO:0005654 nucleoplasm; …	GO:1901265 nucleoside phosphate binding; GO:0016773 phosphotransferase activity, alcohol group as acceptor; GO:0005515 protein binding; GO:0004672 protein kinase activity; GO:0097159 organic cyclic compound binding; GO:1901363 heterocyclic compound binding; GO:0016301 kinase activity; GO:0032553 ribonucleotide binding; GO:0003824 catalytic activity; GO:0005488 binding; GO:0032550 purine ribonucle…	K02216	CHK1; serine/threonine-protein kinase Chk1 [EC:2.7.11.1]	hsa04110 Cell cycle; hsa04115 p53 signaling pathway; hsa04218 Cellular senescence; hsa05166 Human T-cell leukemia virus 1 infection; hsa05170 Human immunodeficiency virus 1 infection; hsa05203 Viral carcinogenesis	IPR000719; IPR011009;	Protein kinase domain; Protein kinase-like domain;
Q9H2U2	157	0.465	Down	0.00026148	K	Inorganic pyrophosphatase 2, mitochondrial OS=Homo sapiens OX=9606 GN=PPA2 PE=1 SV=2	PPA2	1	9.52746e-14	119.94	DK(1)STNCFGDNDPIDVCEIGSK	3	-0.37577	1	1.587	1.465	1.381	0.699	0.738	0.626	mitochondria	GO:0065008 regulation of biological quality; GO:0006518 peptide metabolic process; GO:0006725 cellular aromatic compound metabolic process; GO:0044267 cellular protein metabolic process; GO:0044699 single-organism process; GO:0009058 biosynthetic process; GO:0043039 tRNA aminoacylation; GO:1901566 organonitrogen compound biosynthetic process; GO:0044237 cellular metabolic process; GO:0006796 phos…	GO:0005759 mitochondrial matrix; GO:0043229 intracellular organelle; GO:0044421 extracellular region part; GO:0044429 mitochondrial part; GO:0005737 cytoplasm; GO:0044446 intracellular organelle part; GO:0031982 vesicle; GO:0044424 intracellular part; GO:0005623 cell; GO:0005576 extracellular region; GO:0044422 organelle part; GO:0005739 mitochondrion; GO:0043231 intracellular membrane-bounded or…	GO:0000287 magnesium ion binding; GO:0004427 inorganic diphosphatase activity; GO:0004722 protein serine/threonine phosphatase activity; GO:0016791 phosphatase activity; GO:0043167 ion binding; GO:0016817 hydrolase activity, acting on acid anhydrides; GO:0016787 hydrolase activity; GO:0004721 phosphoprotein phosphatase activity; GO:0016462 pyrophosphatase activity; GO:0003824 catalytic activity; …	K01507	ppa; inorganic pyrophosphatase [EC:3.6.1.1]	hsa00190 Oxidative phosphorylation
Q9UBW7	672	0.35	Down	1.66157e-05	K	Zinc finger MYM-type protein 2 OS=Homo sapiens OX=9606 GN=ZMYM2 PE=1 SV=1	ZMYM2	1	0.0356549	68.657	TCSDDYK(1)K	2	-0.30627	1	1.592	1.658	1.672	0.603	0.588	0.533	cytoplasm	GO:0097659 nucleic acid-templated transcription; GO:0044699 single-organism process; GO:0018212 peptidyl-tyrosine modification; GO:0009058 biosynthetic process; GO:0044237 cellular metabolic process; GO:0006796 phosphate-containing compound metabolic process; GO:2001141 regulation of RNA biosynthetic process; GO:0008152 metabolic process; GO:0043170 macromolecule metabolic process; GO:0019538 pro…	GO:0043229 intracellular organelle; GO:0044446 intracellular organelle part; GO:0005737 cytoplasm; GO:0031981 nuclear lumen; GO:0044424 intracellular part; GO:0016604 nuclear body; GO:0005623 cell; GO:0005829 cytosol; GO:0044422 organelle part; GO:0031974 membrane-enclosed lumen; GO:0043231 intracellular membrane-bounded organelle; GO:0043226 organelle; GO:0016605 PML body; GO:0005654 nucleoplasm…	GO:0000981 RNA polymerase II transcription factor activity, sequence-specific DNA binding; GO:0003677 DNA binding; GO:0016773 phosphotransferase activity, alcohol group as acceptor; GO:0043167 ion binding; GO:0031624 ubiquitin conjugating enzyme binding; GO:0004713 protein tyrosine kinase activity; GO:0005515 protein binding; GO:0004672 protein kinase activity; GO:0008270 zinc ion binding; GO:000…				IPR021893; IPR010507; IPR011017;	Protein of unknown function DUF3504; Zinc finger, MYM-type; TRASH domain;
P49591	57	0.444	Down	1.62408e-05	K	Serine--tRNA ligase, cytoplasmic OS=Homo sapiens OX=9606 GN=SARS PE=1 SV=3	SARS	1	0.0215894	85.676	LK(1)NLCSK	3	-0.033729	2	1.478	1.56	1.469	0.645	0.699	0.657	cytoplasm	GO:0006518 peptide metabolic process; GO:0006725 cellular aromatic compound metabolic process; GO:0044267 cellular protein metabolic process; GO:0044699 single-organism process; GO:0009058 biosynthetic process; GO:0043039 tRNA aminoacylation; GO:1901566 organonitrogen compound biosynthetic process; GO:0044237 cellular metabolic process; GO:0071704 organic substance metabolic process; GO:0008152 m…	GO:0070062 extracellular exosome; GO:0043226 organelle; GO:0044421 extracellular region part; GO:0044464 cell part; GO:0005622 intracellular; GO:0005737 cytoplasm; GO:0031982 vesicle; GO:1903561 extracellular vesicle; GO:0044424 intracellular part; GO:0005829 cytosol; GO:0005623 cell; GO:0043227 membrane-bounded organelle; GO:0005576 extracellular region; GO:0043230 extracellular organelle; GO:00…	GO:0016876 ligase activity, forming aminoacyl-tRNA and related compounds; GO:0003723 RNA binding; GO:0004828 serine-tRNA ligase activity; GO:0005524 ATP binding; GO:1901265 nucleoside phosphate binding; GO:0016875 ligase activity, forming carbon-oxygen bonds; GO:0016874 ligase activity; GO:0001882 nucleoside binding; GO:0043167 ion binding; GO:0098619 selenocysteine-tRNA ligase activity; GO:00001…	K01875	SARS, serS; seryl-tRNA synthetase [EC:6.1.1.11]	hsa00970 Aminoacyl-tRNA biosynthesis	IPR010978; IPR002314; IPR015866; IPR006195; IPR033729;	tRNA-binding arm; Aminoacyl-tRNA synthetase, class II (G/ P/ S/T); Serine-tRNA synthetase, type1, N-terminal; Aminoacyl-tRNA synthetase, class II; Serine-tRNA ligase catalytic core domain;
P49591	62	0.431	Down	1.3747e-06	K	Serine--tRNA ligase, cytoplasmic OS=Homo sapiens OX=9606 GN=SARS PE=1 SV=3	SARS	1	5.52415e-06	131.69	NLCSK(1)TIGEK	2	-0.47793	2	1.508	1.556	1.499	0.672	0.663	0.632	cytoplasm	GO:0006518 peptide metabolic process; GO:0006725 cellular aromatic compound metabolic process; GO:0044267 cellular protein metabolic process; GO:0044699 single-organism process; GO:0009058 biosynthetic process; GO:0043039 tRNA aminoacylation; GO:1901566 organonitrogen compound biosynthetic process; GO:0044237 cellular metabolic process; GO:0071704 organic substance metabolic process; GO:0008152 m…	GO:0070062 extracellular exosome; GO:0043226 organelle; GO:0044421 extracellular region part; GO:0044464 cell part; GO:0005622 intracellular; GO:0005737 cytoplasm; GO:0031982 vesicle; GO:1903561 extracellular vesicle; GO:0044424 intracellular part; GO:0005829 cytosol; GO:0005623 cell; GO:0043227 membrane-bounded organelle; GO:0005576 extracellular region; GO:0043230 extracellular organelle; GO:00…	GO:0016876 ligase activity, forming aminoacyl-tRNA and related compounds; GO:0003723 RNA binding; GO:0004828 serine-tRNA ligase activity; GO:0005524 ATP binding; GO:1901265 nucleoside phosphate binding; GO:0016875 ligase activity, forming carbon-oxygen bonds; GO:0016874 ligase activity; GO:0001882 nucleoside binding; GO:0043167 ion binding; GO:0098619 selenocysteine-tRNA ligase activity; GO:00001…	K01875	SARS, serS; seryl-tRNA synthetase [EC:6.1.1.11]	hsa00970 Aminoacyl-tRNA biosynthesis	IPR010978; IPR002314; IPR015866; IPR006195; IPR033729;	tRNA-binding arm; Aminoacyl-tRNA synthetase, class II (G/ P/ S/T); Serine-tRNA synthetase, type1, N-terminal; Aminoacyl-tRNA synthetase, class II; Serine-tRNA ligase catalytic core domain;
Q9NT62	185	0.432	Down	1.2368e-06	K	Ubiquitin-like-conjugating enzyme ATG3 OS=Homo sapiens OX=9606 GN=ATG3 PE=1 SV=1	ATG3	1	1.2016e-27	167.41	AK(1)TDAGGEDAILQTR	2	0.5084	2	1.529	1.524	1.503	0.63	0.665	0.674	cytoplasm	GO:0044085 cellular component biogenesis; GO:0060627 regulation of vesicle-mediated transport; GO:1905037 autophagosome organization; GO:0060491 regulation of cell projection assembly; GO:0051129 negative regulation of cellular component organization; GO:0000422 mitophagy; GO:0044699 single-organism process; GO:1903008 organelle disassembly; GO:0044804 nucleophagy; GO:0006914 autophagy; GO:004423…	GO:0000153 cytoplasmic ubiquitin ligase complex; GO:1902494 catalytic complex; GO:0044464 cell part; GO:0005622 intracellular; GO:0005737 cytoplasm; GO:0032991 macromolecular complex; GO:0044424 intracellular part; GO:1990234 transferase complex; GO:0005829 cytosol; GO:0005623 cell; GO:0000151 ubiquitin ligase complex; GO:0044444 cytoplasmic part;	GO:0019776 Atg8 ligase activity; GO:0019787 ubiquitin-like protein transferase activity; GO:0003824 catalytic activity; GO:0005488 binding; GO:0016874 ligase activity; GO:0019777 Atg12 transferase activity; GO:0005515 protein binding; GO:0016740 transferase activity; GO:0019899 enzyme binding;	K08343	ATG3; ubiquitin-like-conjugating enzyme ATG3	hsa04136 Autophagy - other; hsa04140 Autophagy - animal; hsa05167 Kaposi sarcoma-associated herpesvirus infection	IPR007135; IPR019461; IPR007134;	Autophagy-related protein 3; Autophagy-related protein 3, C-terminal; Autophagy-related protein 3, N-terminal;
Q9NQC1	32	0.613	Down	0.00021912	K	E3 ubiquitin-protein ligase Jade-2 OS=Homo sapiens OX=9606 GN=JADE2 PE=1 SV=2	JADE2	1	2.92012e-16	142.74	CSK(1)LPSSTK(1)SGWPR	3	0.31246	2	1.315	1.282	1.325	0.852	0.802	0.749	nucleus	GO:0018393 internal peptidyl-lysine acetylation; GO:0016043 cellular component organization; GO:0016570 histone modification; GO:0044267 cellular protein metabolic process; GO:0044237 cellular metabolic process; GO:0071704 organic substance metabolic process; GO:0018205 peptidyl-lysine modification; GO:0008152 metabolic process; GO:0043981 histone H4-K5 acetylation; GO:0043543 protein acylation; …	GO:0043229 intracellular organelle; GO:0044421 extracellular region part; GO:0044446 intracellular organelle part; GO:0031982 vesicle; GO:0032991 macromolecular complex; GO:0031981 nuclear lumen; GO:0044424 intracellular part; GO:1990234 transferase complex; GO:0005623 cell; GO:0005576 extracellular region; GO:0000123 histone acetyltransferase complex; GO:0044422 organelle part; GO:0031974 membra…	GO:0046914 transition metal ion binding; GO:0005488 binding; GO:0043167 ion binding; GO:0043169 cation binding; GO:0046872 metal ion binding; GO:0005515 protein binding; GO:0008270 zinc ion binding;	K22155	JADE2; E3 ubiquitin-protein ligase Jade-2 [EC:2.3.2.27]		IPR001965; IPR013083; IPR011011; IPR019787; IPR019542;	Zinc finger, PHD-type; Zinc finger, RING/FYVE/PHD-type; Zinc finger, FYVE/PHD-type; Zinc finger, PHD-finger; Enhancer of polycomb-like, N-terminal;
P22234	286	0.537	Down	0.000181891	K	Multifunctional protein ADE2 OS=Homo sapiens OX=9606 GN=PAICS PE=1 SV=3	PAICS	1	2.20743e-08	119.87	K(1)ACGNFGIPCELR	2	-2.213	1	1.354	1.511	1.298	0.761	0.735	0.738	cytoplasm	GO:0046148 pigment biosynthetic process; GO:0009167 purine ribonucleoside monophosphate metabolic process; GO:0009117 nucleotide metabolic process; GO:0044699 single-organism process; GO:0009058 biosynthetic process; GO:0009156 ribonucleoside monophosphate biosynthetic process; GO:0046040 IMP metabolic process; GO:0044237 cellular metabolic process; GO:0006796 phosphate-containing compound metabo…	GO:0016020 membrane; GO:0044421 extracellular region part; GO:0031982 vesicle; GO:0005737 cytoplasm; GO:0044424 intracellular part; GO:0005623 cell; GO:0005829 cytosol; GO:0005576 extracellular region; GO:0043226 organelle; GO:0070062 extracellular exosome; GO:0005622 intracellular; GO:0044464 cell part; GO:1903561 extracellular vesicle; GO:0043227 membrane-bounded organelle; GO:0043230 extracell…	GO:1901265 nucleoside phosphate binding; GO:0016874 ligase activity; GO:0005515 protein binding; GO:0097159 organic cyclic compound binding; GO:1901363 heterocyclic compound binding; GO:0042802 identical protein binding; GO:0003824 catalytic activity; GO:0032553 ribonucleotide binding; GO:0016830 carbon-carbon lyase activity; GO:0005488 binding; GO:0045296 cadherin binding; GO:0032550 purine ribo…	K01587	PAICS; phosphoribosylaminoimidazole carboxylase / phosphoribosylaminoimidazole-succinocarboxamide synthase [EC:4.1.1.21 6.3.2.6]	hsa00230 Purine metabolism; hsa01100 Metabolic pathways	IPR033626; IPR028923; IPR000031; IPR013816;	Class II PurE; SAICAR synthetase/ADE2, N-terminal; PurE domain; ATP-grasp fold, subdomain 2;
Q58FF8	332	0.479	Down	1.56421e-05	K	Putative heat shock protein HSP 90-beta 2 OS=Homo sapiens OX=9606 GN=HSP90AB2P PE=1 SV=2	HSP90AB2P	1	0.00072324	111.17	AK(1)FENLCK	3	-0.027707	2	1.508	1.469	1.398	0.714	0.677	0.704	cytoplasm	GO:0006457 protein folding; GO:0006950 response to stress; GO:0050896 response to stimulus; GO:0009987 cellular process;	GO:0070062 extracellular exosome; GO:0043226 organelle; GO:0044421 extracellular region part; GO:0044464 cell part; GO:0005622 intracellular; GO:0005737 cytoplasm; GO:0031982 vesicle; GO:1903561 extracellular vesicle; GO:0044424 intracellular part; GO:0005623 cell; GO:0043227 membrane-bounded organelle; GO:0005576 extracellular region; GO:0043230 extracellular organelle;	GO:0005524 ATP binding; GO:1901265 nucleoside phosphate binding; GO:0001882 nucleoside binding; GO:0043167 ion binding; GO:0005515 protein binding; GO:0000166 nucleotide binding; GO:0097159 organic cyclic compound binding; GO:1901363 heterocyclic compound binding; GO:0032549 ribonucleoside binding; GO:0097367 carbohydrate derivative binding; GO:0032553 ribonucleotide binding; GO:0005488 binding; …	K04079	HSP90A, htpG; molecular chaperone HtpG	hsa04141 Protein processing in endoplasmic reticulum; hsa04151 PI3K-Akt signaling pathway; hsa04217 Necroptosis; hsa04612 Antigen processing and presentation; hsa04621 NOD-like receptor signaling pathway; hsa04657 IL-17 signaling pathway; hsa04659 Th17 cell differentiation; hsa04914 Progesterone-mediated oocyte maturation; hsa04915 Estrogen signaling pathway; hsa05200 Pathways in cancer; hsa05215…	IPR020568; IPR020575; IPR003594;	Ribosomal protein S5 domain 2-type fold; Heat shock protein Hsp90, N-terminal; Histidine kinase-like ATPase, C-terminal domain;
Q01518	412	0.542	Down	1.0061e-06	K	Adenylyl cyclase-associated protein 1 OS=Homo sapiens OX=9606 GN=CAP1 PE=1 SV=5	CAP1	1	4.92775e-06	93.371	VPTISINK(1)TDGCHAYLSK	3	-0.80445	1	1.374	1.386	1.384	0.771	0.736	0.741	cytoplasm	GO:0044700 single organism signaling; GO:0051349 positive regulation of lyase activity; GO:0045321 leukocyte activation; GO:0051674 localization of cell; GO:0048869 cellular developmental process; GO:0009891 positive regulation of biosynthetic process; GO:0032989 cellular component morphogenesis; GO:0044699 single-organism process; GO:0030819 positive regulation of cAMP biosynthetic process; GO:0…	GO:0034774 secretory granule lumen; GO:0016020 membrane; GO:0005615 extracellular space; GO:0044421 extracellular region part; GO:0005938 cell cortex; GO:0031410 cytoplasmic vesicle; GO:0030054 cell junction; GO:0071944 cell periphery; GO:0031982 vesicle; GO:0099568 cytoplasmic region; GO:0005737 cytoplasm; GO:0044433 cytoplasmic vesicle part; GO:0030863 cortical cytoskeleton; GO:0030864 cortical…	GO:0003779 actin binding; GO:0005515 protein binding; GO:0008092 cytoskeletal protein binding; GO:0008179 adenylate cyclase binding; GO:0005488 binding; GO:0019899 enzyme binding;	K17261	CAP1_2, SRV2; adenylyl cyclase-associated protein		IPR006599; IPR013992; IPR016098; IPR013912; IPR017901;	CARP motif; Adenylate cyclase-associated CAP, N-terminal; Cyclase-associated protein CAP/septum formation inhibitor MinC, C-terminal; Adenylate cyclase-associated CAP, C-terminal; C-CAP/cofactor C-like domain;
P55084	201	0.533	Down	8.3563e-05	K	Trifunctional enzyme subunit beta, mitochondrial OS=Homo sapiens OX=9606 GN=HADHB PE=1 SV=3	HADHB	1	0.00334774	106.2	LSLISK(1)FR	2	0.085179	1	1.327	1.423	1.427	0.77	0.759	0.697	nucleus	GO:0034440 lipid oxidation; GO:0046486 glycerolipid metabolic process; GO:0044699 single-organism process; GO:0044255 cellular lipid metabolic process; GO:0044237 cellular metabolic process; GO:0006796 phosphate-containing compound metabolic process; GO:0071704 organic substance metabolic process; GO:0046471 phosphatidylglycerol metabolic process; GO:0008152 metabolic process; GO:0030258 lipid mo…	GO:0016020 membrane; GO:0044421 extracellular region part; GO:0019867 outer membrane; GO:0005783 endoplasmic reticulum; GO:0031090 organelle membrane; GO:0031982 vesicle; GO:0005737 cytoplasm; GO:0044424 intracellular part; GO:0005623 cell; GO:0044422 organelle part; GO:0043228 non-membrane-bounded organelle; GO:0070062 extracellular exosome; GO:0005740 mitochondrial envelope; GO:0031974 membrane…	GO:0003723 RNA binding; GO:0016829 lyase activity; GO:0016836 hydro-lyase activity; GO:0005515 protein binding; GO:0016509 long-chain-3-hydroxyacyl-CoA dehydrogenase activity; GO:0016747 transferase activity, transferring acyl groups other than amino-acyl groups; GO:0016835 carbon-oxygen lyase activity; GO:0004300 enoyl-CoA hydratase activity; GO:0016491 oxidoreductase activity; GO:1901363 hetero…	K07509	HADHB; acetyl-CoA acyltransferase [EC:2.3.1.16]	hsa00062 Fatty acid elongation; hsa00071 Fatty acid degradation; hsa00280 Valine, leucine and isoleucine degradation; hsa01100 Metabolic pathways; hsa01212 Fatty acid metabolism	IPR016039; IPR020616; IPR020617;	Thiolase-like; Thiolase, N-terminal; Thiolase, C-terminal;
P55084	188	0.248	Down	5.8526e-08	K	Trifunctional enzyme subunit beta, mitochondrial OS=Homo sapiens OX=9606 GN=HADHB PE=1 SV=3	HADHB	1	0.000377405	113.93	LMLDLNK(1)AK	3	0.19183	2	1.873	1.814	1.785	0.46	0.448	0.449	nucleus	GO:0034440 lipid oxidation; GO:0046486 glycerolipid metabolic process; GO:0044699 single-organism process; GO:0044255 cellular lipid metabolic process; GO:0044237 cellular metabolic process; GO:0006796 phosphate-containing compound metabolic process; GO:0071704 organic substance metabolic process; GO:0046471 phosphatidylglycerol metabolic process; GO:0008152 metabolic process; GO:0030258 lipid mo…	GO:0016020 membrane; GO:0044421 extracellular region part; GO:0019867 outer membrane; GO:0005783 endoplasmic reticulum; GO:0031090 organelle membrane; GO:0031982 vesicle; GO:0005737 cytoplasm; GO:0044424 intracellular part; GO:0005623 cell; GO:0044422 organelle part; GO:0043228 non-membrane-bounded organelle; GO:0070062 extracellular exosome; GO:0005740 mitochondrial envelope; GO:0031974 membrane…	GO:0003723 RNA binding; GO:0016829 lyase activity; GO:0016836 hydro-lyase activity; GO:0005515 protein binding; GO:0016509 long-chain-3-hydroxyacyl-CoA dehydrogenase activity; GO:0016747 transferase activity, transferring acyl groups other than amino-acyl groups; GO:0016835 carbon-oxygen lyase activity; GO:0004300 enoyl-CoA hydratase activity; GO:0016491 oxidoreductase activity; GO:1901363 hetero…	K07509	HADHB; acetyl-CoA acyltransferase [EC:2.3.1.16]	hsa00062 Fatty acid elongation; hsa00071 Fatty acid degradation; hsa00280 Valine, leucine and isoleucine degradation; hsa01100 Metabolic pathways; hsa01212 Fatty acid metabolism	IPR016039; IPR020616; IPR020617;	Thiolase-like; Thiolase, N-terminal; Thiolase, C-terminal;
P55084	293	0.446	Down	0.00158112	K	Trifunctional enzyme subunit beta, mitochondrial OS=Homo sapiens OX=9606 GN=HADHB PE=1 SV=3	HADHB	1	0.0081807	79.116	LK(1)PAFIK	3	-0.1348	1	1.416	1.582	1.5	0.668	0.666	0.672	nucleus	GO:0034440 lipid oxidation; GO:0046486 glycerolipid metabolic process; GO:0044699 single-organism process; GO:0044255 cellular lipid metabolic process; GO:0044237 cellular metabolic process; GO:0006796 phosphate-containing compound metabolic process; GO:0071704 organic substance metabolic process; GO:0046471 phosphatidylglycerol metabolic process; GO:0008152 metabolic process; GO:0030258 lipid mo…	GO:0016020 membrane; GO:0044421 extracellular region part; GO:0019867 outer membrane; GO:0005783 endoplasmic reticulum; GO:0031090 organelle membrane; GO:0031982 vesicle; GO:0005737 cytoplasm; GO:0044424 intracellular part; GO:0005623 cell; GO:0044422 organelle part; GO:0043228 non-membrane-bounded organelle; GO:0070062 extracellular exosome; GO:0005740 mitochondrial envelope; GO:0031974 membrane…	GO:0003723 RNA binding; GO:0016829 lyase activity; GO:0016836 hydro-lyase activity; GO:0005515 protein binding; GO:0016509 long-chain-3-hydroxyacyl-CoA dehydrogenase activity; GO:0016747 transferase activity, transferring acyl groups other than amino-acyl groups; GO:0016835 carbon-oxygen lyase activity; GO:0004300 enoyl-CoA hydratase activity; GO:0016491 oxidoreductase activity; GO:1901363 hetero…	K07509	HADHB; acetyl-CoA acyltransferase [EC:2.3.1.16]	hsa00062 Fatty acid elongation; hsa00071 Fatty acid degradation; hsa00280 Valine, leucine and isoleucine degradation; hsa01100 Metabolic pathways; hsa01212 Fatty acid metabolism	IPR016039; IPR020616; IPR020617;	Thiolase-like; Thiolase, N-terminal; Thiolase, C-terminal;
P42765	181	0.475	Down	5.6749e-05	K	3-ketoacyl-CoA thiolase, mitochondrial OS=Homo sapiens OX=9606 GN=ACAA2 PE=1 SV=2	ACAA2	1	8.6644e-07	114.31	EECDK(1)YALQSQQR	2	-0.088702	2	1.484	1.524	1.379	0.707	0.721	0.658	mitochondria	GO:0010941 regulation of cell death; GO:0065008 regulation of biological quality; GO:0009968 negative regulation of signal transduction; GO:0006066 alcohol metabolic process; GO:0051129 negative regulation of cellular component organization; GO:0023051 regulation of signaling; GO:0006839 mitochondrial transport; GO:0044699 single-organism process; GO:0009058 biosynthetic process; GO:0044255 cellu…	GO:0016020 membrane; GO:0044421 extracellular region part; GO:0031090 organelle membrane; GO:0031982 vesicle; GO:0005737 cytoplasm; GO:0044424 intracellular part; GO:0005623 cell; GO:0044422 organelle part; GO:0005740 mitochondrial envelope; GO:0070062 extracellular exosome; GO:0031974 membrane-enclosed lumen; GO:0070013 intracellular organelle lumen; GO:0044464 cell part; GO:0005622 intracellula…	GO:0097159 organic cyclic compound binding; GO:1901363 heterocyclic compound binding; GO:0003723 RNA binding; GO:0016746 transferase activity, transferring acyl groups; GO:0003824 catalytic activity; GO:0005488 binding; GO:0003676 nucleic acid binding; GO:0003988 acetyl-CoA C-acyltransferase activity; GO:0005515 protein binding; GO:0016408 C-acyltransferase activity; GO:0016747 transferase activi…	K07508	ACAA2; acetyl-CoA acyltransferase 2 [EC:2.3.1.16]	hsa00062 Fatty acid elongation; hsa00071 Fatty acid degradation; hsa00280 Valine, leucine and isoleucine degradation; hsa01100 Metabolic pathways; hsa01212 Fatty acid metabolism	IPR016039; IPR020616; IPR020617;	Thiolase-like; Thiolase, N-terminal; Thiolase, C-terminal;
Q8IVF2	1932	0.538	Down	2.0959e-05	K	Protein AHNAK2 OS=Homo sapiens OX=9606 GN=AHNAK2 PE=1 SV=2	AHNAK2	1	0.0221961	60.76	GAK(1)LDLK	3	-1.1865	1	1.44	1.364	1.36	0.776	0.735	0.728	nucleus		GO:0016020 membrane; GO:0031090 organelle membrane; GO:0031410 cytoplasmic vesicle; GO:0071944 cell periphery; GO:0030016 myofibril; GO:0031982 vesicle; GO:0005737 cytoplasm; GO:0044433 cytoplasmic vesicle part; GO:0099512 supramolecular fiber; GO:0044424 intracellular part; GO:0030018 Z disc; GO:0099080 supramolecular complex; GO:0005623 cell; GO:0031674 I band; GO:0044422 organelle part; GO:004…	GO:0005515 protein binding; GO:0005488 binding;				IPR001478;	PDZ domain;
Q06830	178	0.453	Down	6.26e-05	K	Peroxiredoxin-1 OS=Homo sapiens OX=9606 GN=PRDX1 PE=1 SV=1	PRDX1	0.999997	5.6436e-11	97.69	HGEVCPAGWK(1)PGSDTIKPDVQK	5	0.01739	4	1.498	1.509	1.469	0.721	0.688	0.619	cytoplasm	GO:0006801 superoxide metabolic process; GO:0000303 response to superoxide; GO:0065008 regulation of biological quality; GO:0032872 regulation of stress-activated MAPK cascade; GO:0002262 myeloid cell homeostasis; GO:1903533 regulation of protein targeting; GO:0023051 regulation of signaling; GO:0044699 single-organism process; GO:0044237 cellular metabolic process; GO:0048871 multicellular organ…	GO:0097708 intracellular vesicle; GO:0043229 intracellular organelle; GO:0005615 extracellular space; GO:0044421 extracellular region part; GO:0031410 cytoplasmic vesicle; GO:0042470 melanosome; GO:0005737 cytoplasm; GO:0031982 vesicle; GO:0044424 intracellular part; GO:0005829 cytosol; GO:0005623 cell; GO:0005576 extracellular region; GO:0005739 mitochondrion; GO:0048770 pigment granule; GO:0031…	GO:0003723 RNA binding; GO:0016209 antioxidant activity; GO:0005515 protein binding; GO:0016491 oxidoreductase activity; GO:1901363 heterocyclic compound binding; GO:0097159 organic cyclic compound binding; GO:0050839 cell adhesion molecule binding; GO:0042802 identical protein binding; GO:0003824 catalytic activity; GO:0005488 binding; GO:0008379 thioredoxin peroxidase activity; GO:0045296 cadhe…	K13279	PRDX1; peroxiredoxin 1 [EC:1.11.1.15]	hsa04146 Peroxisome; hsa05146 Amoebiasis	IPR019479; IPR000866; IPR012336; IPR013766;	Peroxiredoxin, C-terminal; Alkyl hydroperoxide reductase subunit C/ Thiol specific antioxidant; Thioredoxin-like fold; Thioredoxin domain;
Q9UQR1	211	2.294	Up	2.0082e-05	K	Zinc finger protein 148 OS=Homo sapiens OX=9606 GN=ZNF148 PE=1 SV=2	ZNF148	1	0.0270936	63.816	FIQK(1)YLLQR	2	2.8693	1	0.547	0.593	0.555	1.247	1.282	1.36	nucleus	GO:0044085 cellular component biogenesis; GO:0022414 reproductive process; GO:0097659 nucleic acid-templated transcription; GO:0007420 brain development; GO:0009891 positive regulation of biosynthetic process; GO:0044699 single-organism process; GO:0009058 biosynthetic process; GO:0044237 cellular metabolic process; GO:0051253 negative regulation of RNA metabolic process; GO:0048857 neural nucleu…	GO:0043226 organelle; GO:0043231 intracellular membrane-bounded organelle; GO:0043229 intracellular organelle; GO:0005634 nucleus; GO:0044464 cell part; GO:0005622 intracellular; GO:0005737 cytoplasm; GO:0012505 endomembrane system; GO:0044424 intracellular part; GO:0005794 Golgi apparatus; GO:0043227 membrane-bounded organelle; GO:0005623 cell; GO:0044444 cytoplasmic part;	GO:0000981 RNA polymerase II transcription factor activity, sequence-specific DNA binding; GO:0003677 DNA binding; GO:0000976 transcription regulatory region sequence-specific DNA binding; GO:0003690 double-stranded DNA binding; GO:0043167 ion binding; GO:0001012 RNA polymerase II regulatory region DNA binding; GO:1990837 sequence-specific double-stranded DNA binding; GO:0005515 protein binding; …				IPR015880; IPR007087; IPR013087;	Zinc finger, C2H2-like; Zinc finger, C2H2; Zinc finger C2H2-type/integrase DNA-binding domain;
Q6PJ69	354	0.575	Down	0.0084028	K	Tripartite motif-containing protein 65 OS=Homo sapiens OX=9606 GN=TRIM65 PE=1 SV=3	TRIM65	1	0.000105657	126.31	QDQQVK(1)HCR	3	-0.47486	1	1.184	1.591	1.257	0.75	0.876	0.692	nucleus	GO:0050794 regulation of cellular process; GO:0050789 regulation of biological process; GO:0009893 positive regulation of metabolic process; GO:0010508 positive regulation of autophagy; GO:0031329 regulation of cellular catabolic process; GO:0031325 positive regulation of cellular metabolic process; GO:0009896 positive regulation of catabolic process; GO:0009894 regulation of catabolic process; G…	GO:0043229 intracellular organelle; GO:0005737 cytoplasm; GO:0044446 intracellular organelle part; GO:0031981 nuclear lumen; GO:0044424 intracellular part; GO:0005829 cytosol; GO:0005623 cell; GO:0044422 organelle part; GO:0043226 organelle; GO:0043231 intracellular membrane-bounded organelle; GO:0031974 membrane-enclosed lumen; GO:0005654 nucleoplasm; GO:0005634 nucleus; GO:0070013 intracellular…	GO:0046914 transition metal ion binding; GO:0005488 binding; GO:0043167 ion binding; GO:0043169 cation binding; GO:0046872 metal ion binding; GO:0005515 protein binding; GO:0008270 zinc ion binding;	K12031	TRIM65; tripartite motif-containing protein 65		IPR001841; IPR001870; IPR013320; IPR003877; IPR000315; IPR013083; IPR018957; IPR003879;	Zinc finger, RING-type; B30.2/SPRY domain; Concanavalin A-like lectin/glucanase domain; SPRY domain; B-box-type zinc finger; Zinc finger, RING/FYVE/PHD-type; Zinc finger, C3HC4 RING-type; Butyrophylin-like;
Q7L576	516	0.465	Down	0.00060253	K	Cytoplasmic FMR1-interacting protein 1 OS=Homo sapiens OX=9606 GN=CYFIP1 PE=1 SV=1	CYFIP1	1	2.47216e-06	84.107	K(1)TVCDWETGHEPFNDPALR	3	0.46049	1	1.526	1.529	1.372	0.613	0.778	0.666	cytoplasm	GO:0044700 single organism signaling; GO:0044085 cellular component biogenesis; GO:0060627 regulation of vesicle-mediated transport; GO:0065008 regulation of biological quality; GO:0045321 leukocyte activation; GO:0007166 cell surface receptor signaling pathway; GO:0060491 regulation of cell projection assembly; GO:0032989 cellular component morphogenesis; GO:0030832 regulation of actin filament …	GO:0030425 dendrite; GO:0044421 extracellular region part; GO:0060076 excitatory synapse; GO:0005737 cytoplasm; GO:0043025 neuronal cell body; GO:0044433 cytoplasmic vesicle part; GO:0032991 macromolecular complex; GO:0034518 RNA cap binding complex; GO:0098858 actin-based cell projection; GO:0005623 cell; GO:0043197 dendritic spine; GO:0044422 organelle part; GO:0070062 extracellular exosome; GO…	GO:0031267 small GTPase binding; GO:0051015 actin filament binding; GO:0003723 RNA binding; GO:0017048 Rho GTPase binding; GO:0000339 RNA cap binding; GO:0048365 Rac GTPase binding; GO:0000340 RNA 7-methylguanosine cap binding; GO:0044877 macromolecular complex binding; GO:0005515 protein binding; GO:1901363 heterocyclic compound binding; GO:0097159 organic cyclic compound binding; GO:0008092 cyt…	K05749	CYFIP; cytoplasmic FMR1 interacting protein	hsa03013 RNA transport; hsa04810 Regulation of actin cytoskeleton; hsa05130 Pathogenic Escherichia coli infection
Q7L576	1188	1.882	Up	5.6212e-05	K	Cytoplasmic FMR1-interacting protein 1 OS=Homo sapiens OX=9606 GN=CYFIP1 PE=1 SV=1	CYFIP1	0.999952	0.000231257	89.231	VQK(1)HDGKDEIIK	4	-1.3205	2	0.634	0.688	0.65	1.296	1.192	1.224	cytoplasm	GO:0044700 single organism signaling; GO:0044085 cellular component biogenesis; GO:0060627 regulation of vesicle-mediated transport; GO:0065008 regulation of biological quality; GO:0045321 leukocyte activation; GO:0007166 cell surface receptor signaling pathway; GO:0060491 regulation of cell projection assembly; GO:0032989 cellular component morphogenesis; GO:0030832 regulation of actin filament …	GO:0030425 dendrite; GO:0044421 extracellular region part; GO:0060076 excitatory synapse; GO:0005737 cytoplasm; GO:0043025 neuronal cell body; GO:0044433 cytoplasmic vesicle part; GO:0032991 macromolecular complex; GO:0034518 RNA cap binding complex; GO:0098858 actin-based cell projection; GO:0005623 cell; GO:0043197 dendritic spine; GO:0044422 organelle part; GO:0070062 extracellular exosome; GO…	GO:0031267 small GTPase binding; GO:0051015 actin filament binding; GO:0003723 RNA binding; GO:0017048 Rho GTPase binding; GO:0000339 RNA cap binding; GO:0048365 Rac GTPase binding; GO:0000340 RNA 7-methylguanosine cap binding; GO:0044877 macromolecular complex binding; GO:0005515 protein binding; GO:1901363 heterocyclic compound binding; GO:0097159 organic cyclic compound binding; GO:0008092 cyt…	K05749	CYFIP; cytoplasmic FMR1 interacting protein	hsa03013 RNA transport; hsa04810 Regulation of actin cytoskeleton; hsa05130 Pathogenic Escherichia coli infection
Q5SSJ5	365	0.363	Down	0.00086097	K	Heterochromatin protein 1-binding protein 3 OS=Homo sapiens OX=9606 GN=HP1BP3 PE=1 SV=1	HP1BP3	1	0.00080643	119.53	TCSTTALK(1)K	2	-0.20534	1	1.624	1.614	1.624	0.608	0.554	0.603	nucleus	GO:0044085 cellular component biogenesis; GO:0050794 regulation of cellular process; GO:0034728 nucleosome organization; GO:0016043 cellular component organization; GO:0033554 cellular response to stress; GO:0065008 regulation of biological quality; GO:0042127 regulation of cell proliferation; GO:0060255 regulation of macromolecule metabolic process; GO:0009628 response to abiotic stimulus; GO:00…	GO:0043229 intracellular organelle; GO:0043232 intracellular non-membrane-bounded organelle; GO:0044446 intracellular organelle part; GO:0032991 macromolecular complex; GO:0031981 nuclear lumen; GO:0044424 intracellular part; GO:0016604 nuclear body; GO:0005623 cell; GO:0044422 organelle part; GO:0044427 chromosomal part; GO:0000786 nucleosome; GO:0043228 non-membrane-bounded organelle; GO:004323…	GO:0097159 organic cyclic compound binding; GO:1901363 heterocyclic compound binding; GO:0003677 DNA binding; GO:0005488 binding; GO:0044877 macromolecular complex binding; GO:0003676 nucleic acid binding; GO:0031491 nucleosome binding; GO:0005515 protein binding; GO:0003682 chromatin binding;				IPR011991; IPR005818;	Winged helix-turn-helix DNA-binding domain; Linker histone H1/H5, domain H15;
Q07020	97	0.479	Down	0.00020176	K	60S ribosomal protein L18 OS=Homo sapiens OX=9606 GN=RPL18 PE=1 SV=2	RPL18	1	0.00960442	87.806	VQEVPK(1)LK	3	0.91036	2	1.47	1.582	1.32	0.718	0.67	0.706	cytoplasm	GO:0044085 cellular component biogenesis; GO:0022613 ribonucleoprotein complex biogenesis; GO:0072594 establishment of protein localization to organelle; GO:0006518 peptide metabolic process; GO:0009058 biosynthetic process; GO:0044764 multi-organism cellular process; GO:0044237 cellular metabolic process; GO:0015031 protein transport; GO:0051234 establishment of localization; GO:0006605 protein …	GO:0016020 membrane; GO:0005783 endoplasmic reticulum; GO:0030054 cell junction; GO:0005737 cytoplasm; GO:0032991 macromolecular complex; GO:0044424 intracellular part; GO:0005623 cell; GO:0044422 organelle part; GO:0043228 non-membrane-bounded organelle; GO:0031974 membrane-enclosed lumen; GO:0005925 focal adhesion; GO:0070013 intracellular organelle lumen; GO:0044391 ribosomal subunit; GO:00056…	GO:0097159 organic cyclic compound binding; GO:1901363 heterocyclic compound binding; GO:0003723 RNA binding; GO:0005488 binding; GO:0003676 nucleic acid binding; GO:0005198 structural molecule activity; GO:0003735 structural constituent of ribosome;	K02883	RP-L18e, RPL18; large subunit ribosomal protein L18e	hsa03010 Ribosome	IPR021131;	Ribosomal protein L18e/L15P;
P84243	28	0.53	Down	3.3766e-07	K	Histone H3.3 OS=Homo sapiens OX=9606 GN=H3-3A PE=1 SV=2	H3-3A	1	0.000237623	110.98	K(1)SAPSTGGVK(1)K	2	-0.62162	13	1.416	1.375	1.394	0.729	0.742	0.749	nucleus	GO:0044085 cellular component biogenesis; GO:0001649 osteoblast differentiation; GO:0007596 blood coagulation; GO:0065008 regulation of biological quality; GO:0022414 reproductive process; GO:0007420 brain development; GO:0007566 embryo implantation; GO:0008584 male gonad development; GO:0044237 cellular metabolic process; GO:0045927 positive regulation of growth; GO:0001558 regulation of cell gr…	GO:0001740 Barr body; GO:0044421 extracellular region part; GO:0000784 nuclear chromosome, telomeric region; GO:0000781 chromosome, telomeric region; GO:0031982 vesicle; GO:0000803 sex chromosome; GO:0032991 macromolecular complex; GO:0044424 intracellular part; GO:0005623 cell; GO:0044422 organelle part; GO:0044427 chromosomal part; GO:0043228 non-membrane-bounded organelle; GO:0070062 extracell…	GO:0042393 histone binding; GO:0003677 DNA binding; GO:0031490 chromatin DNA binding; GO:0046982 protein heterodimerization activity; GO:0001158 enhancer sequence-specific DNA binding; GO:0000976 transcription regulatory region sequence-specific DNA binding; GO:0003690 double-stranded DNA binding; GO:0044877 macromolecular complex binding; GO:0046983 protein dimerization activity; GO:1990837 sequ…	K11253	H3; histone H3	hsa05034 Alcoholism; hsa05131 Shigellosis; hsa05202 Transcriptional misregulation in cancer; hsa05322 Systemic lupus erythematosus	IPR009072; IPR007125;	Histone-fold; Histone H2A/H2B/H3;
P84243	37	0.422	Down	4.7532e-06	K	Histone H3.3 OS=Homo sapiens OX=9606 GN=H3-3A PE=1 SV=2	H3-3A	1	0.000237623	93.623	K(1)SAPSTGGVK(1)K	2	-0.62162	5	1.579	1.45	1.573	0.637	0.664	0.641	nucleus	GO:0044085 cellular component biogenesis; GO:0001649 osteoblast differentiation; GO:0007596 blood coagulation; GO:0065008 regulation of biological quality; GO:0022414 reproductive process; GO:0007420 brain development; GO:0007566 embryo implantation; GO:0008584 male gonad development; GO:0044237 cellular metabolic process; GO:0045927 positive regulation of growth; GO:0001558 regulation of cell gr…	GO:0001740 Barr body; GO:0044421 extracellular region part; GO:0000784 nuclear chromosome, telomeric region; GO:0000781 chromosome, telomeric region; GO:0031982 vesicle; GO:0000803 sex chromosome; GO:0032991 macromolecular complex; GO:0044424 intracellular part; GO:0005623 cell; GO:0044422 organelle part; GO:0044427 chromosomal part; GO:0043228 non-membrane-bounded organelle; GO:0070062 extracell…	GO:0042393 histone binding; GO:0003677 DNA binding; GO:0031490 chromatin DNA binding; GO:0046982 protein heterodimerization activity; GO:0001158 enhancer sequence-specific DNA binding; GO:0000976 transcription regulatory region sequence-specific DNA binding; GO:0003690 double-stranded DNA binding; GO:0044877 macromolecular complex binding; GO:0046983 protein dimerization activity; GO:1990837 sequ…	K11253	H3; histone H3	hsa05034 Alcoholism; hsa05131 Shigellosis; hsa05202 Transcriptional misregulation in cancer; hsa05322 Systemic lupus erythematosus	IPR009072; IPR007125;	Histone-fold; Histone H2A/H2B/H3;
P29401	283	1.66	Up	0.0096592	K	Transketolase OS=Homo sapiens OX=9606 GN=TKT PE=1 SV=3	TKT	1	1.52026e-05	65.887	K(1)ILATPPQEDAPSVDIANIR	3	0.18279	1	0.831	0.619	0.709	1.16	1.07	1.353	cytoplasm	GO:0006739 NADP metabolic process; GO:0016051 carbohydrate biosynthetic process; GO:0019362 pyridine nucleotide metabolic process; GO:0040008 regulation of growth; GO:0006725 cellular aromatic compound metabolic process; GO:0046496 nicotinamide nucleotide metabolic process; GO:0009117 nucleotide metabolic process; GO:0044699 single-organism process; GO:0009058 biosynthetic process; GO:0046364 mon…	GO:0044421 extracellular region part; GO:0031982 vesicle; GO:0005737 cytoplasm; GO:0044424 intracellular part; GO:0016604 nuclear body; GO:0005623 cell; GO:0044422 organelle part; GO:0070062 extracellular exosome; GO:0031974 membrane-enclosed lumen; GO:0005654 nucleoplasm; GO:0070013 intracellular organelle lumen; GO:0016607 nuclear speck; GO:0043209 myelin sheath; GO:0005622 intracellular; GO:00…	GO:0042802 identical protein binding; GO:0003824 catalytic activity; GO:0042803 protein homodimerization activity; GO:0005488 binding; GO:0016744 transferase activity, transferring aldehyde or ketonic groups; GO:0043167 ion binding; GO:0046983 protein dimerization activity; GO:0043169 cation binding; GO:0046872 metal ion binding; GO:0005515 protein binding; GO:0016740 transferase activity; GO:004…	K00615	E2.2.1.1, tktA, tktB; transketolase [EC:2.2.1.1]	hsa00030 Pentose phosphate pathway; hsa01100 Metabolic pathways; hsa01200 Carbon metabolism; hsa01230 Biosynthesis of amino acids	IPR005474; IPR009014; IPR033248; IPR005475; IPR029061;	Transketolase, N-terminal; Transketolase C-terminal/Pyruvate-ferredoxin oxidoreductase domain II; Transketolase, C-terminal domain; Transketolase-like, pyrimidine-binding domain; Thiamin diphosphate-binding fold;
P29401	465	0.608	Down	0.000104734	K	Transketolase OS=Homo sapiens OX=9606 GN=TKT PE=1 SV=3	TKT	1	8.54772e-17	140.77	AVELAANTK(1)GICFIR	2	-0.015525	2	1.381	1.245	1.309	0.783	0.818	0.791	cytoplasm	GO:0006739 NADP metabolic process; GO:0016051 carbohydrate biosynthetic process; GO:0019362 pyridine nucleotide metabolic process; GO:0040008 regulation of growth; GO:0006725 cellular aromatic compound metabolic process; GO:0046496 nicotinamide nucleotide metabolic process; GO:0009117 nucleotide metabolic process; GO:0044699 single-organism process; GO:0009058 biosynthetic process; GO:0046364 mon…	GO:0044421 extracellular region part; GO:0031982 vesicle; GO:0005737 cytoplasm; GO:0044424 intracellular part; GO:0016604 nuclear body; GO:0005623 cell; GO:0044422 organelle part; GO:0070062 extracellular exosome; GO:0031974 membrane-enclosed lumen; GO:0005654 nucleoplasm; GO:0070013 intracellular organelle lumen; GO:0016607 nuclear speck; GO:0043209 myelin sheath; GO:0005622 intracellular; GO:00…	GO:0042802 identical protein binding; GO:0003824 catalytic activity; GO:0042803 protein homodimerization activity; GO:0005488 binding; GO:0016744 transferase activity, transferring aldehyde or ketonic groups; GO:0043167 ion binding; GO:0046983 protein dimerization activity; GO:0043169 cation binding; GO:0046872 metal ion binding; GO:0005515 protein binding; GO:0016740 transferase activity; GO:004…	K00615	E2.2.1.1, tktA, tktB; transketolase [EC:2.2.1.1]	hsa00030 Pentose phosphate pathway; hsa01100 Metabolic pathways; hsa01200 Carbon metabolism; hsa01230 Biosynthesis of amino acids	IPR005474; IPR009014; IPR033248; IPR005475; IPR029061;	Transketolase, N-terminal; Transketolase C-terminal/Pyruvate-ferredoxin oxidoreductase domain II; Transketolase, C-terminal domain; Transketolase-like, pyrimidine-binding domain; Thiamin diphosphate-binding fold;
P28290	308	0.539	Down	0.00024228	K	Protein ITPRID2 OS=Homo sapiens OX=9606 GN=ITPRID2 PE=1 SV=3	ITPRID2	1	0.000743272	91.202	LNLCVDK(1)TEK	2	1.1638	1	1.486	1.318	1.355	0.733	0.798	0.712	nucleus		GO:0016020 membrane; GO:0043229 intracellular organelle; GO:0071944 cell periphery; GO:0005737 cytoplasm; GO:0044424 intracellular part; GO:0005829 cytosol; GO:0005623 cell; GO:0005886 plasma membrane; GO:0043231 intracellular membrane-bounded organelle; GO:0043226 organelle; GO:0005634 nucleus; GO:0005622 intracellular; GO:0044464 cell part; GO:0043227 membrane-bounded organelle; GO:0044444 cyto…	GO:0051015 actin filament binding; GO:0008092 cytoskeletal protein binding; GO:0005102 receptor binding; GO:0005488 binding; GO:0044877 macromolecular complex binding; GO:0003779 actin binding; GO:0005515 protein binding; GO:0032403 protein complex binding;				IPR029325; IPR029326;	IP3R-interacting domain; Sperm-specific antigen 2, C-terminal;
P63098	91	0.609	Down	2.1079e-05	K	Calcineurin subunit B type 1 OS=Homo sapiens OX=9606 GN=PPP3R1 PE=1 SV=2	PPP3R1	0.992001	0.0310274	51.528	GDK(0.008)EQK(0.992)LR	3	1.0201	1	1.276	1.344	1.307	0.772	0.811	0.808	cytoplasm	GO:0044700 single organism signaling; GO:0065008 regulation of biological quality; GO:0010941 regulation of cell death; GO:0007272 ensheathment of neurons; GO:0007166 cell surface receptor signaling pathway; GO:0030323 respiratory tube development; GO:1903533 regulation of protein targeting; GO:0051532 regulation of NFAT protein import into nucleus; GO:0009891 positive regulation of biosynthetic …	GO:0043229 intracellular organelle; GO:0016020 membrane; GO:0071944 cell periphery; GO:0044446 intracellular organelle part; GO:0005737 cytoplasm; GO:0031981 nuclear lumen; GO:0032991 macromolecular complex; GO:0008287 protein serine/threonine phosphatase complex; GO:0044424 intracellular part; GO:0005623 cell; GO:0005829 cytosol; GO:1903293 phosphatase complex; GO:0044422 organelle part; GO:0005…	GO:0004722 protein serine/threonine phosphatase activity; GO:0016791 phosphatase activity; GO:0043167 ion binding; GO:0005515 protein binding; GO:0016787 hydrolase activity; GO:0004721 phosphoprotein phosphatase activity; GO:0005516 calmodulin binding; GO:0042578 phosphoric ester hydrolase activity; GO:0003824 catalytic activity; GO:0005488 binding; GO:0016788 hydrolase activity, acting on ester …	K06268	PPP3R, CNB; serine/threonine-protein phosphatase 2B regulatory subunit	hsa04010 MAPK signaling pathway; hsa04020 Calcium signaling pathway; hsa04022 cGMP-PKG signaling pathway; hsa04114 Oocyte meiosis; hsa04218 Cellular senescence; hsa04310 Wnt signaling pathway; hsa04360 Axon guidance; hsa04370 VEGF signaling pathway; hsa04380 Osteoclast differentiation; hsa04625 C-type lectin receptor signaling pathway; hsa04650 Natural killer cell mediated cytotoxicity; hsa04658 …	IPR002048; IPR011992;	EF-hand domain; EF-hand domain pair;
Q9Y2W2	13	1.624	Up	2.2721e-05	K	WW domain-binding protein 11 OS=Homo sapiens OX=9606 GN=WBP11 PE=1 SV=1	WBP11	1	0.000655499	89.992	SGK(1)FMNPTDQAR	2	-1.3379	1	0.727	0.724	0.744	1.237	1.168	1.16	nucleus	GO:0044085 cellular component biogenesis; GO:0022613 ribonucleoprotein complex biogenesis; GO:1903955 positive regulation of protein targeting to mitochondrion; GO:1903533 regulation of protein targeting; GO:0010821 regulation of mitochondrion organization; GO:0044237 cellular metabolic process; GO:1903749 positive regulation of establishment of protein localization to mitochondrion; GO:0051130 p…	GO:0043229 intracellular organelle; GO:0044446 intracellular organelle part; GO:0005737 cytoplasm; GO:0031981 nuclear lumen; GO:0032991 macromolecular complex; GO:0044424 intracellular part; GO:0005681 spliceosomal complex; GO:0016604 nuclear body; GO:0005829 cytosol; GO:0005623 cell; GO:0044422 organelle part; GO:0031974 membrane-enclosed lumen; GO:0043226 organelle; GO:0043231 intracellular mem…	GO:0097159 organic cyclic compound binding; GO:1901363 heterocyclic compound binding; GO:0003677 DNA binding; GO:0003723 RNA binding; GO:0030234 enzyme regulator activity; GO:0019888 protein phosphatase regulator activity; GO:0019208 phosphatase regulator activity; GO:0005488 binding; GO:0003676 nucleic acid binding; GO:0003697 single-stranded DNA binding; GO:0050699 WW domain binding; GO:0005515…	K12866	WBP11, NPWBP; WW domain-binding protein 11	hsa03040 Spliceosome
P21127	225	1.783	Up	0.00045797	K	Cyclin-dependent kinase 11B OS=Homo sapiens OX=9606 GN=CDK11B PE=1 SV=4	CDK11B	1	0.0320036	70.028	EDYSDK(1)VK	2	-0.78313	1	0.639	0.669	0.744	1.266	1.248	1.145	nucleus	GO:0050794 regulation of cellular process; GO:0016043 cellular component organization; GO:0016310 phosphorylation; GO:0007346 regulation of mitotic cell cycle; GO:0040008 regulation of growth; GO:0060255 regulation of macromolecule metabolic process; GO:0007067 mitotic nuclear division; GO:0048285 organelle fission; GO:0019219 regulation of nucleobase-containing compound metabolic process; GO:004…	GO:0043226 organelle; GO:0043231 intracellular membrane-bounded organelle; GO:0043229 intracellular organelle; GO:0005634 nucleus; GO:0044464 cell part; GO:0005622 intracellular; GO:0005737 cytoplasm; GO:0044424 intracellular part; GO:0043227 membrane-bounded organelle; GO:0005623 cell;	GO:1901265 nucleoside phosphate binding; GO:0016773 phosphotransferase activity, alcohol group as acceptor; GO:0005515 protein binding; GO:0004693 cyclin-dependent protein serine/threonine kinase activity; GO:0004672 protein kinase activity; GO:1901363 heterocyclic compound binding; GO:0097159 organic cyclic compound binding; GO:0016301 kinase activity; GO:0003824 catalytic activity; GO:0032553 r…	K08818	CDC2L; cell division cycle 2-like [EC:2.7.11.22]		IPR000719; IPR011009;	Protein kinase domain; Protein kinase-like domain;
Q9UQE7	978	0.614	Down	0.00154246	K	Structural maintenance of chromosomes protein 3 OS=Homo sapiens OX=9606 GN=SMC3 PE=1 SV=2	SMC3	1	0.0367824	55.676	K(1)YSHVNK	3	-0.83081	1	1.268	1.23	1.418	0.871	0.742	0.791	cytoplasm	GO:0044700 single organism signaling; GO:0022414 reproductive process; GO:0007067 mitotic nuclear division; GO:0044699 single-organism process; GO:0090329 regulation of DNA-dependent DNA replication; GO:0010564 regulation of cell cycle process; GO:0044237 cellular metabolic process; GO:0008152 metabolic process; GO:0000819 sister chromatid segregation; GO:0007165 signal transduction; GO:0007154 c…	GO:0044421 extracellular region part; GO:0005737 cytoplasm; GO:0032991 macromolecular complex; GO:0044424 intracellular part; GO:0030893 meiotic cohesin complex; GO:0005623 cell; GO:0044420 extracellular matrix component; GO:0044422 organelle part; GO:0005604 basement membrane; GO:0044427 chromosomal part; GO:0043228 non-membrane-bounded organelle; GO:0005856 cytoskeleton; GO:0031974 membrane-enc…	GO:0070840 dynein complex binding; GO:1901265 nucleoside phosphate binding; GO:0003774 motor activity; GO:0046983 protein dimerization activity; GO:0016817 hydrolase activity, acting on acid anhydrides; GO:0016787 hydrolase activity; GO:0005515 protein binding; GO:0003682 chromatin binding; GO:1901363 heterocyclic compound binding; GO:0097159 organic cyclic compound binding; GO:0016462 pyrophosph…	K06669	SMC3, CSPG6; structural maintenance of chromosome 3 (chondroitin sulfate proteoglycan 6)	hsa04110 Cell cycle; hsa04114 Oocyte meiosis	IPR010935; IPR027417; IPR003395;	SMCs flexible hinge; P-loop containing nucleoside triphosphate hydrolase; RecF/RecN/SMC, N-terminal;
Q9UQE7	977	0.44	Down	1.2541e-06	K	Structural maintenance of chromosomes protein 3 OS=Homo sapiens OX=9606 GN=SMC3 PE=1 SV=2	SMC3	0.99997	0.0237068	46.88	KLEQCNTELK(1)K	3	1.6771	1	1.475	1.481	1.565	0.661	0.655	0.674	cytoplasm	GO:0044700 single organism signaling; GO:0022414 reproductive process; GO:0007067 mitotic nuclear division; GO:0044699 single-organism process; GO:0090329 regulation of DNA-dependent DNA replication; GO:0010564 regulation of cell cycle process; GO:0044237 cellular metabolic process; GO:0008152 metabolic process; GO:0000819 sister chromatid segregation; GO:0007165 signal transduction; GO:0007154 c…	GO:0044421 extracellular region part; GO:0005737 cytoplasm; GO:0032991 macromolecular complex; GO:0044424 intracellular part; GO:0030893 meiotic cohesin complex; GO:0005623 cell; GO:0044420 extracellular matrix component; GO:0044422 organelle part; GO:0005604 basement membrane; GO:0044427 chromosomal part; GO:0043228 non-membrane-bounded organelle; GO:0005856 cytoskeleton; GO:0031974 membrane-enc…	GO:0070840 dynein complex binding; GO:1901265 nucleoside phosphate binding; GO:0003774 motor activity; GO:0046983 protein dimerization activity; GO:0016817 hydrolase activity, acting on acid anhydrides; GO:0016787 hydrolase activity; GO:0005515 protein binding; GO:0003682 chromatin binding; GO:1901363 heterocyclic compound binding; GO:0097159 organic cyclic compound binding; GO:0016462 pyrophosph…	K06669	SMC3, CSPG6; structural maintenance of chromosome 3 (chondroitin sulfate proteoglycan 6)	hsa04110 Cell cycle; hsa04114 Oocyte meiosis	IPR010935; IPR027417; IPR003395;	SMCs flexible hinge; P-loop containing nucleoside triphosphate hydrolase; RecF/RecN/SMC, N-terminal;
P42704	1357	1.508	Up	0.00045917	K	Leucine-rich PPR motif-containing protein, mitochondrial OS=Homo sapiens OX=9606 GN=LRPPRC PE=1 SV=3	LRPPRC	1	0.0295481	72.23	LDDLFLK(1)R	2	0.38254	1	0.752	0.803	0.752	1.115	1.129	1.235	mitochondria	GO:0050658 RNA transport; GO:0097659 nucleic acid-templated transcription; GO:0010608 posttranscriptional regulation of gene expression; GO:0044699 single-organism process; GO:0009058 biosynthetic process; GO:0000961 negative regulation of mitochondrial RNA catabolic process; GO:0044237 cellular metabolic process; GO:0009451 RNA modification; GO:0051253 negative regulation of RNA metabolic proces…	GO:0016020 membrane; GO:0019867 outer membrane; GO:0042175 nuclear outer membrane-endoplasmic reticulum membrane network; GO:0005874 microtubule; GO:0031090 organelle membrane; GO:0005737 cytoplasm; GO:0032991 macromolecular complex; GO:0044424 intracellular part; GO:0099512 supramolecular fiber; GO:0005623 cell; GO:0099080 supramolecular complex; GO:0044422 organelle part; GO:0005640 nuclear out…	GO:0003723 RNA binding; GO:0003677 DNA binding; GO:0031625 ubiquitin protein ligase binding; GO:0015631 tubulin binding; GO:0003697 single-stranded DNA binding; GO:0016787 hydrolase activity; GO:0048487 beta-tubulin binding; GO:0005515 protein binding; GO:1901363 heterocyclic compound binding; GO:0097159 organic cyclic compound binding; GO:0008092 cytoskeletal protein binding; GO:0003824 catalyti…	K17964	LRPPRC; leucine-rich PPR motif-containing protein, mitochondrial		IPR011990; IPR033443;	Tetratricopeptide-like helical domain; Pentacotripeptide-repeat region of PROPR;
P42704	726	0.566	Down	5.7138e-05	K	Leucine-rich PPR motif-containing protein, mitochondrial OS=Homo sapiens OX=9606 GN=LRPPRC PE=1 SV=3	LRPPRC	1	5.06845e-08	139.48	HDK(1)VEDALNLK	3	-2.0142	3	1.339	1.322	1.403	0.768	0.732	0.8	mitochondria	GO:0050658 RNA transport; GO:0097659 nucleic acid-templated transcription; GO:0010608 posttranscriptional regulation of gene expression; GO:0044699 single-organism process; GO:0009058 biosynthetic process; GO:0000961 negative regulation of mitochondrial RNA catabolic process; GO:0044237 cellular metabolic process; GO:0009451 RNA modification; GO:0051253 negative regulation of RNA metabolic proces…	GO:0016020 membrane; GO:0019867 outer membrane; GO:0042175 nuclear outer membrane-endoplasmic reticulum membrane network; GO:0005874 microtubule; GO:0031090 organelle membrane; GO:0005737 cytoplasm; GO:0032991 macromolecular complex; GO:0044424 intracellular part; GO:0099512 supramolecular fiber; GO:0005623 cell; GO:0099080 supramolecular complex; GO:0044422 organelle part; GO:0005640 nuclear out…	GO:0003723 RNA binding; GO:0003677 DNA binding; GO:0031625 ubiquitin protein ligase binding; GO:0015631 tubulin binding; GO:0003697 single-stranded DNA binding; GO:0016787 hydrolase activity; GO:0048487 beta-tubulin binding; GO:0005515 protein binding; GO:1901363 heterocyclic compound binding; GO:0097159 organic cyclic compound binding; GO:0008092 cytoskeletal protein binding; GO:0003824 catalyti…	K17964	LRPPRC; leucine-rich PPR motif-containing protein, mitochondrial		IPR011990; IPR033443;	Tetratricopeptide-like helical domain; Pentacotripeptide-repeat region of PROPR;
O95292	45	0.307	Down	0.0003986	K	Vesicle-associated membrane protein-associated protein B/C OS=Homo sapiens OX=9606 GN=VAPB PE=1 SV=3	VAPB	1	0.0183623	88.819	VK(1)TTAPR	2	0.92096	1	1.883	1.543	1.719	0.5	0.456	0.622	cytoplasm	GO:0044700 single organism signaling; GO:0065008 regulation of biological quality; GO:0032270 positive regulation of cellular protein metabolic process; GO:0044827 modulation by host of viral genome replication; GO:0044255 cellular lipid metabolic process; GO:0044237 cellular metabolic process; GO:0008610 lipid biosynthetic process; GO:0008152 metabolic process; GO:0035966 response to topological…	GO:0043229 intracellular organelle; GO:0016020 membrane; GO:0042175 nuclear outer membrane-endoplasmic reticulum membrane network; GO:0005783 endoplasmic reticulum; GO:0098588 bounding membrane of organelle; GO:0031090 organelle membrane; GO:0044446 intracellular organelle part; GO:0005737 cytoplasm; GO:0000139 Golgi membrane; GO:0031224 intrinsic component of membrane; GO:0012505 endomembrane sy…	GO:0050839 cell adhesion molecule binding; GO:0042802 identical protein binding; GO:0008092 cytoskeletal protein binding; GO:0046982 protein heterodimerization activity; GO:0042803 protein homodimerization activity; GO:0008017 microtubule binding; GO:0005488 binding; GO:0033149 FFAT motif binding; GO:0046983 protein dimerization activity; GO:0045296 cadherin binding; GO:0015631 tubulin binding; G…	K10707	VAPB, ALS8; vesicle-associated membrane protein-associated protein B	hsa04979 Cholesterol metabolism	IPR008962; IPR000535;	PapD-like; Major sperm protein (MSP) domain;
O95292	43	0.433	Down	0.000179612	K	Vesicle-associated membrane protein-associated protein B/C OS=Homo sapiens OX=9606 GN=VAPB PE=1 SV=3	VAPB	1	0.0107878	97.798	NVCFK(1)VK	2	-2.8447	1	1.635	1.469	1.454	0.619	0.725	0.63	cytoplasm	GO:0044700 single organism signaling; GO:0065008 regulation of biological quality; GO:0032270 positive regulation of cellular protein metabolic process; GO:0044827 modulation by host of viral genome replication; GO:0044255 cellular lipid metabolic process; GO:0044237 cellular metabolic process; GO:0008610 lipid biosynthetic process; GO:0008152 metabolic process; GO:0035966 response to topological…	GO:0043229 intracellular organelle; GO:0016020 membrane; GO:0042175 nuclear outer membrane-endoplasmic reticulum membrane network; GO:0005783 endoplasmic reticulum; GO:0098588 bounding membrane of organelle; GO:0031090 organelle membrane; GO:0044446 intracellular organelle part; GO:0005737 cytoplasm; GO:0000139 Golgi membrane; GO:0031224 intrinsic component of membrane; GO:0012505 endomembrane sy…	GO:0050839 cell adhesion molecule binding; GO:0042802 identical protein binding; GO:0008092 cytoskeletal protein binding; GO:0046982 protein heterodimerization activity; GO:0042803 protein homodimerization activity; GO:0008017 microtubule binding; GO:0005488 binding; GO:0033149 FFAT motif binding; GO:0046983 protein dimerization activity; GO:0045296 cadherin binding; GO:0015631 tubulin binding; G…	K10707	VAPB, ALS8; vesicle-associated membrane protein-associated protein B	hsa04979 Cholesterol metabolism	IPR008962; IPR000535;	PapD-like; Major sperm protein (MSP) domain;
O94905	287	1.947	Up	0.000141126	K	Erlin-2 OS=Homo sapiens OX=9606 GN=ERLIN2 PE=1 SV=1	ERLIN2	1	0.00766576	78.342	YK(1)AIASNSK	2	0.25171	1	0.588	0.669	0.666	1.295	1.242	1.207	extracellular	GO:0044700 single organism signaling; GO:0006066 alcohol metabolic process; GO:0009891 positive regulation of biosynthetic process; GO:0018212 peptidyl-tyrosine modification; GO:0036503 ERAD pathway; GO:0019216 regulation of lipid metabolic process; GO:0044237 cellular metabolic process; GO:0008152 metabolic process; GO:1902931 negative regulation of alcohol biosynthetic process; GO:0090181 regul…	GO:0016020 membrane; GO:0042175 nuclear outer membrane-endoplasmic reticulum membrane network; GO:0044421 extracellular region part; GO:0005783 endoplasmic reticulum; GO:0098857 membrane microdomain; GO:0071944 cell periphery; GO:0031982 vesicle; GO:0005737 cytoplasm; GO:0032991 macromolecular complex; GO:0031224 intrinsic component of membrane; GO:0044424 intracellular part; GO:0005623 cell; GO:…	GO:0015485 cholesterol binding; GO:0032934 sterol binding; GO:0016773 phosphotransferase activity, alcohol group as acceptor; GO:0031625 ubiquitin protein ligase binding; GO:0004713 protein tyrosine kinase activity; GO:0005515 protein binding; GO:0004672 protein kinase activity; GO:0005496 steroid binding; GO:0097159 organic cyclic compound binding; GO:0016301 kinase activity; GO:0003824 catalyti…	K23341			IPR001107;	Band 7 domain;
P02765	225	2.633	Up	1.9636e-06	K	Alpha-2-HS-glycoprotein OS=Homo sapiens OX=9606 GN=AHSG PE=1 SV=2	AHSG	1	1.71027e-17	156.24	CNLLAEK(1)QYGFCK	3	-0.271	5	0.509	0.493	0.523	1.376	1.357	1.282	extracellular	GO:0060627 regulation of vesicle-mediated transport; GO:0051093 negative regulation of developmental process; GO:0045321 leukocyte activation; GO:0009968 negative regulation of signal transduction; GO:0023051 regulation of signaling; GO:0044699 single-organism process; GO:0051241 negative regulation of multicellular organismal process; GO:0030500 regulation of bone mineralization; GO:0031347 regu…	GO:0034774 secretory granule lumen; GO:0005615 extracellular space; GO:0044421 extracellular region part; GO:0031410 cytoplasmic vesicle; GO:0031982 vesicle; GO:0005737 cytoplasm; GO:0044433 cytoplasmic vesicle part; GO:0044424 intracellular part; GO:0005623 cell; GO:0044422 organelle part; GO:0070062 extracellular exosome; GO:0031974 membrane-enclosed lumen; GO:0031983 vesicle lumen; GO:0070013 …	GO:0030234 enzyme regulator activity; GO:0019210 kinase inhibitor activity; GO:0030414 peptidase inhibitor activity; GO:0061134 peptidase regulator activity; GO:0061135 endopeptidase regulator activity; GO:0019207 kinase regulator activity; GO:0004857 enzyme inhibitor activity; GO:0098772 molecular function regulator; GO:0004866 endopeptidase inhibitor activity; GO:0004869 cysteine-type endopepti…	K23409			IPR000010; IPR025760;	Cystatin domain; Fetuin-A-type cystatin domain;
P55735	192	0.494	Down	1.69329e-05	K	Protein SEC13 homolog OS=Homo sapiens OX=9606 GN=SEC13 PE=1 SV=3	SEC13	1	0.000354026	70.889	FASGGCDNLIK(1)LWK	3	-1.05	1	1.463	1.414	1.438	0.682	0.745	0.705	cytoskeleton	GO:0050658 RNA transport; GO:0044085 cellular component biogenesis; GO:0006901 vesicle coating; GO:0048207 vesicle targeting, rough ER to cis-Golgi; GO:0048208 COPII vesicle coating; GO:0023051 regulation of signaling; GO:1902533 positive regulation of intracellular signal transduction; GO:0044699 single-organism process; GO:0015031 protein transport; GO:0051234 establishment of localization; GO:…	GO:0030658 transport vesicle membrane; GO:0016020 membrane; GO:0042175 nuclear outer membrane-endoplasmic reticulum membrane network; GO:0044421 extracellular region part; GO:0005783 endoplasmic reticulum; GO:0031090 organelle membrane; GO:0031410 cytoplasmic vesicle; GO:0031982 vesicle; GO:0005737 cytoplasm; GO:0044433 cytoplasmic vesicle part; GO:0032991 macromolecular complex; GO:0044424 intra…	GO:0005515 protein binding; GO:0042802 identical protein binding; GO:0005488 binding;	K14004	SEC13; protein transport protein SEC13	hsa03013 RNA transport; hsa04141 Protein processing in endoplasmic reticulum; hsa04150 mTOR signaling pathway	IPR017986; IPR015943;	WD40-repeat-containing domain; WD40/YVTN repeat-like-containing domain;
Q69YQ0	170	0.54	Down	2.0451e-05	K	Cytospin-A OS=Homo sapiens OX=9606 GN=SPECC1L PE=1 SV=2	SPECC1L	1	0.0165778	66.267	SK(1)SDNQISDR	2	-0.56482	1	1.32	1.444	1.383	0.738	0.75	0.753	mitochondria	GO:0050794 regulation of cellular process; GO:0016043 cellular component organization; GO:0016477 cell migration; GO:0065008 regulation of biological quality; GO:0051674 localization of cell; GO:0031111 negative regulation of microtubule polymerization or depolymerization; GO:0030835 negative regulation of actin filament depolymerization; GO:0032956 regulation of actin cytoskeleton organization; …	GO:0043229 intracellular organelle; GO:0099513 polymeric cytoskeletal fiber; GO:0005921 gap junction; GO:0043232 intracellular non-membrane-bounded organelle; GO:0044430 cytoskeletal part; GO:0030054 cell junction; GO:0044446 intracellular organelle part; GO:0005737 cytoplasm; GO:0032991 macromolecular complex; GO:0099512 supramolecular fiber; GO:0044424 intracellular part; GO:0099080 supramolecu…	GO:0005515 protein binding; GO:0005488 binding;	K23028			IPR001715;	Calponin homology domain;
P37059	252	1.662	Up	0.0022599	K	Estradiol 17-beta-dehydrogenase 2 OS=Homo sapiens OX=9606 GN=HSD17B2 PE=1 SV=1	HSD17B2	1	0.00141145	97.734	LELSK(1)WGIK	3	0.69419	2	0.719	0.755	0.681	1.184	1.062	1.336	plasma membrane	GO:0042446 hormone biosynthetic process; GO:0000003 reproduction; GO:0044707 single-multicellular organism process; GO:0065008 regulation of biological quality; GO:0001101 response to acid chemical; GO:0001890 placenta development; GO:0022414 reproductive process; GO:0043009 chordate embryonic development; GO:1901700 response to oxygen-containing compound; GO:0044699 single-organism process; GO:0…	GO:0043229 intracellular organelle; GO:0016020 membrane; GO:0005783 endoplasmic reticulum; GO:0042175 nuclear outer membrane-endoplasmic reticulum membrane network; GO:0005737 cytoplasm; GO:0044446 intracellular organelle part; GO:0012505 endomembrane system; GO:0031224 intrinsic component of membrane; GO:0044424 intracellular part; GO:0005623 cell; GO:0016021 integral component of membrane; GO:0…	GO:0016229 steroid dehydrogenase activity; GO:0016614 oxidoreductase activity, acting on CH-OH group of donors; GO:0016616 oxidoreductase activity, acting on the CH-OH group of donors, NAD or NADP as acceptor; GO:0033764 steroid dehydrogenase activity, acting on the CH-OH group of donors, NAD or NADP as acceptor; GO:0047035 testosterone dehydrogenase (NAD+) activity; GO:0003824 catalytic activity…	K13368	HSD17B2; 17beta-estradiol 17-dehydrogenase / 3alpha(17beta)-hydroxysteroid dehydrogenase (NAD+) [EC:1.1.1.62 1.1.1.239]	hsa00140 Steroid hormone biosynthesis; hsa01100 Metabolic pathways; hsa04913 Ovarian steroidogenesis	IPR016040;	NAD(P)-binding domain;
P04920	893	4.44	Up	4.2628e-05	K	Anion exchange protein 2 OS=Homo sapiens OX=9606 GN=SLC4A2 PE=1 SV=4	SLC4A2	1	2.23352e-06	112.42	SLAGQSGQGK(1)PR	2	-2.3535	1	0.287	0.375	0.323	1.476	1.415	1.482	plasma membrane	GO:0000003 reproduction; GO:0044707 single-multicellular organism process; GO:0065008 regulation of biological quality; GO:0034220 ion transmembrane transport; GO:0006885 regulation of pH; GO:0022414 reproductive process; GO:0030003 cellular cation homeostasis; GO:0030641 regulation of cellular pH; GO:0030004 cellular monovalent inorganic cation homeostasis; GO:0044699 single-organism process; GO…	GO:0016323 basolateral plasma membrane; GO:0016020 membrane; GO:0031226 intrinsic component of plasma membrane; GO:0016324 apical plasma membrane; GO:0030054 cell junction; GO:0071944 cell periphery; GO:0070161 anchoring junction; GO:0031224 intrinsic component of membrane; GO:0005887 integral component of plasma membrane; GO:0005623 cell; GO:0016021 integral component of membrane; GO:0005886 pla…	GO:0022804 active transmembrane transporter activity; GO:0015291 secondary active transmembrane transporter activity; GO:0005452 inorganic anion exchanger activity; GO:0015075 ion transmembrane transporter activity; GO:0015301 anion:anion antiporter activity; GO:0022892 substrate-specific transporter activity; GO:0005515 protein binding; GO:0015297 antiporter activity; GO:0015103 inorganic anion …	K13855	SLC4A2, AE2; solute carrier family 4 (anion exchanger), member 2	hsa04970 Salivary secretion; hsa04971 Gastric acid secretion; hsa04972 Pancreatic secretion; hsa04976 Bile secretion	IPR011531; IPR013769; IPR016152;	Bicarbonate transporter, C-terminal; Band 3 cytoplasmic domain; Phosphotransferase/anion transporter;
O00151	294	0.483	Down	0.00030086	K	PDZ and LIM domain protein 1 OS=Homo sapiens OX=9606 GN=PDLIM1 PE=1 SV=4	PDLIM1	1	9.67413e-05	66.022	HPECYVCTDCGTNLK(1)QK	3	-1.3955	1	1.309	1.579	1.467	0.737	0.699	0.666	cytoplasm	GO:0050794 regulation of cellular process; GO:0010468 regulation of gene expression; GO:0006355 regulation of transcription, DNA-templated; GO:0006950 response to stress; GO:0031326 regulation of cellular biosynthetic process; GO:0080090 regulation of primary metabolic process; GO:0009628 response to abiotic stimulus; GO:0060255 regulation of macromolecule metabolic process; GO:0019219 regulation…	GO:0043229 intracellular organelle; GO:0043232 intracellular non-membrane-bounded organelle; GO:0030054 cell junction; GO:0005737 cytoplasm; GO:0070161 anchoring junction; GO:0032991 macromolecular complex; GO:0044424 intracellular part; GO:0005913 cell-cell adherens junction; GO:0005667 transcription factor complex; GO:0005911 cell-cell junction; GO:0005623 cell; GO:0043228 non-membrane-bounded …	GO:0043167 ion binding; GO:0005515 protein binding; GO:0008270 zinc ion binding; GO:0003712 transcription cofactor activity; GO:0098632 protein binding involved in cell-cell adhesion; GO:0050839 cell adhesion molecule binding; GO:0098641 cadherin binding involved in cell-cell adhesion; GO:0098631 protein binding involved in cell adhesion; GO:0046914 transition metal ion binding; GO:0005488 bindin…	K23353			IPR001781; IPR006643; IPR001478; IPR031847;	Zinc finger, LIM-type; Zasp-like motif; PDZ domain; Domain of unknown function DUF4749;
Q01581	46	0.589	Down	0.00028449	K	Hydroxymethylglutaryl-CoA synthase, cytoplasmic OS=Homo sapiens OX=9606 GN=HMGCS1 PE=1 SV=2	HMGCS1	1	0.000108216	82.349	YDGVDAGK(1)YTIGLGQAK	3	0.48089	1	1.369	1.3	1.32	0.727	0.781	0.841	cytoplasm	GO:0048732 gland development; GO:0022414 reproductive process; GO:0006066 alcohol metabolic process; GO:0007420 brain development; GO:0008584 male gonad development; GO:0044699 single-organism process; GO:0044255 cellular lipid metabolic process; GO:0009058 biosynthetic process; GO:0033197 response to vitamin E; GO:0044237 cellular metabolic process; GO:0008610 lipid biosynthetic process; GO:0008…	GO:0044464 cell part; GO:0005622 intracellular; GO:0005737 cytoplasm; GO:0044424 intracellular part; GO:0005623 cell; GO:0005829 cytosol; GO:0044444 cytoplasmic part;	GO:0004421 hydroxymethylglutaryl-CoA synthase activity; GO:0016746 transferase activity, transferring acyl groups; GO:0042802 identical protein binding; GO:0016853 isomerase activity; GO:0003824 catalytic activity; GO:0046912 transferase activity, transferring acyl groups, acyl groups converted into alkyl on transfer; GO:0042803 protein homodimerization activity; GO:0005488 binding; GO:0046983 pr…	K01641	E2.3.3.10; hydroxymethylglutaryl-CoA synthase [EC:2.3.3.10]	hsa00072 Synthesis and degradation of ketone bodies; hsa00280 Valine, leucine and isoleucine degradation; hsa00650 Butanoate metabolism; hsa00900 Terpenoid backbone biosynthesis; hsa01100 Metabolic pathways; hsa03320 PPAR signaling pathway	IPR016039; IPR013746; IPR013528;	Thiolase-like; Hydroxymethylglutaryl-coenzyme A synthase C-terminal domain; Hydroxymethylglutaryl-coenzyme A synthase, N-terminal;
Q01581	409	0.372	Down	0.00050154	K	Hydroxymethylglutaryl-CoA synthase, cytoplasmic OS=Homo sapiens OX=9606 GN=HMGCS1 PE=1 SV=2	HMGCS1	1	1.88095e-06	130.1	ITASLCDLK(1)SR	3	-0.19613	2	1.635	1.652	1.534	0.555	0.713	0.525	cytoplasm	GO:0048732 gland development; GO:0022414 reproductive process; GO:0006066 alcohol metabolic process; GO:0007420 brain development; GO:0008584 male gonad development; GO:0044699 single-organism process; GO:0044255 cellular lipid metabolic process; GO:0009058 biosynthetic process; GO:0033197 response to vitamin E; GO:0044237 cellular metabolic process; GO:0008610 lipid biosynthetic process; GO:0008…	GO:0044464 cell part; GO:0005622 intracellular; GO:0005737 cytoplasm; GO:0044424 intracellular part; GO:0005623 cell; GO:0005829 cytosol; GO:0044444 cytoplasmic part;	GO:0004421 hydroxymethylglutaryl-CoA synthase activity; GO:0016746 transferase activity, transferring acyl groups; GO:0042802 identical protein binding; GO:0016853 isomerase activity; GO:0003824 catalytic activity; GO:0046912 transferase activity, transferring acyl groups, acyl groups converted into alkyl on transfer; GO:0042803 protein homodimerization activity; GO:0005488 binding; GO:0046983 pr…	K01641	E2.3.3.10; hydroxymethylglutaryl-CoA synthase [EC:2.3.3.10]	hsa00072 Synthesis and degradation of ketone bodies; hsa00280 Valine, leucine and isoleucine degradation; hsa00650 Butanoate metabolism; hsa00900 Terpenoid backbone biosynthesis; hsa01100 Metabolic pathways; hsa03320 PPAR signaling pathway	IPR016039; IPR013746; IPR013528;	Thiolase-like; Hydroxymethylglutaryl-coenzyme A synthase C-terminal domain; Hydroxymethylglutaryl-coenzyme A synthase, N-terminal;
Q01581	239	0.441	Down	1.9395e-06	K	Hydroxymethylglutaryl-CoA synthase, cytoplasmic OS=Homo sapiens OX=9606 GN=HMGCS1 PE=1 SV=2	HMGCS1	1	0.00927854	73.665	K(1)IHAQWQK	3	1.6118	1	1.512	1.486	1.52	0.636	0.684	0.674	cytoplasm	GO:0048732 gland development; GO:0022414 reproductive process; GO:0006066 alcohol metabolic process; GO:0007420 brain development; GO:0008584 male gonad development; GO:0044699 single-organism process; GO:0044255 cellular lipid metabolic process; GO:0009058 biosynthetic process; GO:0033197 response to vitamin E; GO:0044237 cellular metabolic process; GO:0008610 lipid biosynthetic process; GO:0008…	GO:0044464 cell part; GO:0005622 intracellular; GO:0005737 cytoplasm; GO:0044424 intracellular part; GO:0005623 cell; GO:0005829 cytosol; GO:0044444 cytoplasmic part;	GO:0004421 hydroxymethylglutaryl-CoA synthase activity; GO:0016746 transferase activity, transferring acyl groups; GO:0042802 identical protein binding; GO:0016853 isomerase activity; GO:0003824 catalytic activity; GO:0046912 transferase activity, transferring acyl groups, acyl groups converted into alkyl on transfer; GO:0042803 protein homodimerization activity; GO:0005488 binding; GO:0046983 pr…	K01641	E2.3.3.10; hydroxymethylglutaryl-CoA synthase [EC:2.3.3.10]	hsa00072 Synthesis and degradation of ketone bodies; hsa00280 Valine, leucine and isoleucine degradation; hsa00650 Butanoate metabolism; hsa00900 Terpenoid backbone biosynthesis; hsa01100 Metabolic pathways; hsa03320 PPAR signaling pathway	IPR016039; IPR013746; IPR013528;	Thiolase-like; Hydroxymethylglutaryl-coenzyme A synthase C-terminal domain; Hydroxymethylglutaryl-coenzyme A synthase, N-terminal;
Q9ULC4	18	0.608	Down	0.0053442	K	Malignant T-cell-amplified sequence 1 OS=Homo sapiens OX=9606 GN=MCTS1 PE=1 SV=1	MCTS1	1	6.99356e-12	123.63	ENVSNCIQLK(1)TSVIK	3	-1.7706	1	1.21	1.273	1.445	0.733	0.918	0.736	cytoplasm	GO:0044085 cellular component biogenesis; GO:0022613 ribonucleoprotein complex biogenesis; GO:0006518 peptide metabolic process; GO:0022618 ribonucleoprotein complex assembly; GO:0097659 nucleic acid-templated transcription; GO:0044699 single-organism process; GO:1903008 organelle disassembly; GO:0009058 biosynthetic process; GO:0044237 cellular metabolic process; GO:2001141 regulation of RNA bio…	GO:0016020 membrane; GO:0071944 cell periphery; GO:0044464 cell part; GO:0005622 intracellular; GO:0005737 cytoplasm; GO:0044424 intracellular part; GO:0005623 cell; GO:0005829 cytosol; GO:0005886 plasma membrane; GO:0044444 cytoplasmic part;	GO:0097159 organic cyclic compound binding; GO:1901363 heterocyclic compound binding; GO:0008135 translation factor activity, RNA binding; GO:0003723 RNA binding; GO:0005488 binding; GO:0003676 nucleic acid binding; GO:0003743 translation initiation factor activity; GO:0005515 protein binding;	K07575	K07575; PUA domain protein		IPR015947; IPR002478; IPR004521;	PUA-like domain; PUA domain; Uncharacterised domain CHP00451;
Q9ULC4	51	0.492	Down	0.000119273	K	Malignant T-cell-amplified sequence 1 OS=Homo sapiens OX=9606 GN=MCTS1 PE=1 SV=1	MCTS1	0.999995	0.00308356	87.895	KDPVK(1)IVR	3	-0.75939	1	1.543	1.444	1.343	0.732	0.674	0.723	cytoplasm	GO:0044085 cellular component biogenesis; GO:0022613 ribonucleoprotein complex biogenesis; GO:0006518 peptide metabolic process; GO:0022618 ribonucleoprotein complex assembly; GO:0097659 nucleic acid-templated transcription; GO:0044699 single-organism process; GO:1903008 organelle disassembly; GO:0009058 biosynthetic process; GO:0044237 cellular metabolic process; GO:2001141 regulation of RNA bio…	GO:0016020 membrane; GO:0071944 cell periphery; GO:0044464 cell part; GO:0005622 intracellular; GO:0005737 cytoplasm; GO:0044424 intracellular part; GO:0005623 cell; GO:0005829 cytosol; GO:0005886 plasma membrane; GO:0044444 cytoplasmic part;	GO:0097159 organic cyclic compound binding; GO:1901363 heterocyclic compound binding; GO:0008135 translation factor activity, RNA binding; GO:0003723 RNA binding; GO:0005488 binding; GO:0003676 nucleic acid binding; GO:0003743 translation initiation factor activity; GO:0005515 protein binding;	K07575	K07575; PUA domain protein		IPR015947; IPR002478; IPR004521;	PUA-like domain; PUA domain; Uncharacterised domain CHP00451;
P27694	163	2.076	Up	1.81648e-05	K	Replication protein A 70 kDa DNA-binding subunit OS=Homo sapiens OX=9606 GN=RPA1 PE=1 SV=2	RPA1	1	9.99335e-08	143.97	AYGASK(1)TFGK	3	1.1683	2	0.616	0.618	0.6	1.341	1.243	1.224	cytoplasm	GO:0044085 cellular component biogenesis; GO:0065008 regulation of biological quality; GO:0006296 nucleotide-excision repair, DNA incision, 5'-to lesion; GO:0023051 regulation of signaling; GO:0006289 nucleotide-excision repair; GO:0044699 single-organism process; GO:0009058 biosynthetic process; GO:0044237 cellular metabolic process; GO:0051130 positive regulation of cellular component organizat…	GO:0000784 nuclear chromosome, telomeric region; GO:0000781 chromosome, telomeric region; GO:0043601 nuclear replisome; GO:0032991 macromolecular complex; GO:0044424 intracellular part; GO:0016604 nuclear body; GO:0005623 cell; GO:0044422 organelle part; GO:0044427 chromosomal part; GO:0043228 non-membrane-bounded organelle; GO:0031974 membrane-enclosed lumen; GO:0016605 PML body; GO:0005654 nucl…	GO:0097159 organic cyclic compound binding; GO:1901363 heterocyclic compound binding; GO:0003677 DNA binding; GO:0005488 binding; GO:0043167 ion binding; GO:0003676 nucleic acid binding; GO:0046872 metal ion binding; GO:0043169 cation binding; GO:0003697 single-stranded DNA binding; GO:0005515 protein binding; GO:0003684 damaged DNA binding;	K07466	RFA1, RPA1, rpa; replication factor A1	hsa03030 DNA replication; hsa03420 Nucleotide excision repair; hsa03430 Mismatch repair; hsa03440 Homologous recombination; hsa03460 Fanconi anemia pathway	IPR031657; IPR012340; IPR004365; IPR013955; IPR007199;	Replication protein A, OB domain; Nucleic acid-binding, OB-fold; OB-fold nucleic acid binding domain, AA-tRNA synthetase-type; Replication factor A, C-terminal; Replication factor-A protein 1, N-terminal;
Q92499	516	0.599	Down	0.00156233	K	ATP-dependent RNA helicase DDX1 OS=Homo sapiens OX=9606 GN=DDX1 PE=1 SV=2	DDX1	1	1.53069e-16	128.01	TK(1)IDCDNLEQYFIQQGGGPDK	4	-0.037811	1	1.248	1.39	1.32	0.774	0.879	0.716	cytoplasm	GO:0044085 cellular component biogenesis; GO:0022613 ribonucleoprotein complex biogenesis; GO:1903608 protein localization to cytoplasmic stress granule; GO:0022618 ribonucleoprotein complex assembly; GO:0010608 posttranscriptional regulation of gene expression; GO:0097659 nucleic acid-templated transcription; GO:0032392 DNA geometric change; GO:0044699 single-organism process; GO:0009058 biosynt…	GO:0016020 membrane; GO:0005737 cytoplasm; GO:0032991 macromolecular complex; GO:0044424 intracellular part; GO:0016604 nuclear body; GO:0005623 cell; GO:0036464 cytoplasmic ribonucleoprotein granule; GO:0044422 organelle part; GO:0043228 non-membrane-bounded organelle; GO:0031974 membrane-enclosed lumen; GO:0005654 nucleoplasm; GO:0072669 tRNA-splicing ligase complex; GO:0070013 intracellular or…	GO:1901265 nucleoside phosphate binding; GO:0008026 ATP-dependent helicase activity; GO:0016817 hydrolase activity, acting on acid anhydrides; GO:0005515 protein binding; GO:0016787 hydrolase activity; GO:0003682 chromatin binding; GO:0016887 ATPase activity; GO:0097159 organic cyclic compound binding; GO:1901363 heterocyclic compound binding; GO:0016462 pyrophosphatase activity; GO:0032553 ribon…	K13177	DDX1; ATP-dependent RNA helicase DDX1 [EC:3.6.4.13]		IPR011545; IPR001870; IPR027417; IPR013320; IPR003877; IPR014014; IPR014001; IPR001650;	DEAD/DEAH box helicase domain; B30.2/SPRY domain; P-loop containing nucleoside triphosphate hydrolase; Concanavalin A-like lectin/glucanase domain; SPRY domain; RNA helicase, DEAD-box type, Q motif; Helicase superfamily 1/2, ATP-binding domain; Helicase, C-terminal;
Q92499	234	0.498	Down	5.7082e-05	K	ATP-dependent RNA helicase DDX1 OS=Homo sapiens OX=9606 GN=DDX1 PE=1 SV=2	DDX1	1	9.11479e-13	128.71	NQALFPACVLK(1)NAELK	3	0.095706	3	1.391	1.44	1.473	0.764	0.684	0.694	cytoplasm	GO:0044085 cellular component biogenesis; GO:0022613 ribonucleoprotein complex biogenesis; GO:1903608 protein localization to cytoplasmic stress granule; GO:0022618 ribonucleoprotein complex assembly; GO:0010608 posttranscriptional regulation of gene expression; GO:0097659 nucleic acid-templated transcription; GO:0032392 DNA geometric change; GO:0044699 single-organism process; GO:0009058 biosynt…	GO:0016020 membrane; GO:0005737 cytoplasm; GO:0032991 macromolecular complex; GO:0044424 intracellular part; GO:0016604 nuclear body; GO:0005623 cell; GO:0036464 cytoplasmic ribonucleoprotein granule; GO:0044422 organelle part; GO:0043228 non-membrane-bounded organelle; GO:0031974 membrane-enclosed lumen; GO:0005654 nucleoplasm; GO:0072669 tRNA-splicing ligase complex; GO:0070013 intracellular or…	GO:1901265 nucleoside phosphate binding; GO:0008026 ATP-dependent helicase activity; GO:0016817 hydrolase activity, acting on acid anhydrides; GO:0005515 protein binding; GO:0016787 hydrolase activity; GO:0003682 chromatin binding; GO:0016887 ATPase activity; GO:0097159 organic cyclic compound binding; GO:1901363 heterocyclic compound binding; GO:0016462 pyrophosphatase activity; GO:0032553 ribon…	K13177	DDX1; ATP-dependent RNA helicase DDX1 [EC:3.6.4.13]		IPR011545; IPR001870; IPR027417; IPR013320; IPR003877; IPR014014; IPR014001; IPR001650;	DEAD/DEAH box helicase domain; B30.2/SPRY domain; P-loop containing nucleoside triphosphate hydrolase; Concanavalin A-like lectin/glucanase domain; SPRY domain; RNA helicase, DEAD-box type, Q motif; Helicase superfamily 1/2, ATP-binding domain; Helicase, C-terminal;
Q92499	117	0.557	Down	0.00031917	K	ATP-dependent RNA helicase DDX1 OS=Homo sapiens OX=9606 GN=DDX1 PE=1 SV=2	DDX1	1	0.0199015	50.297	EVK(1)EWHGCR	3	-2.7089	1	1.324	1.419	1.344	0.693	0.777	0.808	cytoplasm	GO:0044085 cellular component biogenesis; GO:0022613 ribonucleoprotein complex biogenesis; GO:1903608 protein localization to cytoplasmic stress granule; GO:0022618 ribonucleoprotein complex assembly; GO:0010608 posttranscriptional regulation of gene expression; GO:0097659 nucleic acid-templated transcription; GO:0032392 DNA geometric change; GO:0044699 single-organism process; GO:0009058 biosynt…	GO:0016020 membrane; GO:0005737 cytoplasm; GO:0032991 macromolecular complex; GO:0044424 intracellular part; GO:0016604 nuclear body; GO:0005623 cell; GO:0036464 cytoplasmic ribonucleoprotein granule; GO:0044422 organelle part; GO:0043228 non-membrane-bounded organelle; GO:0031974 membrane-enclosed lumen; GO:0005654 nucleoplasm; GO:0072669 tRNA-splicing ligase complex; GO:0070013 intracellular or…	GO:1901265 nucleoside phosphate binding; GO:0008026 ATP-dependent helicase activity; GO:0016817 hydrolase activity, acting on acid anhydrides; GO:0005515 protein binding; GO:0016787 hydrolase activity; GO:0003682 chromatin binding; GO:0016887 ATPase activity; GO:0097159 organic cyclic compound binding; GO:1901363 heterocyclic compound binding; GO:0016462 pyrophosphatase activity; GO:0032553 ribon…	K13177	DDX1; ATP-dependent RNA helicase DDX1 [EC:3.6.4.13]		IPR011545; IPR001870; IPR027417; IPR013320; IPR003877; IPR014014; IPR014001; IPR001650;	DEAD/DEAH box helicase domain; B30.2/SPRY domain; P-loop containing nucleoside triphosphate hydrolase; Concanavalin A-like lectin/glucanase domain; SPRY domain; RNA helicase, DEAD-box type, Q motif; Helicase superfamily 1/2, ATP-binding domain; Helicase, C-terminal;
Q13564	207	1.787	Up	0.000102642	K	NEDD8-activating enzyme E1 regulatory subunit OS=Homo sapiens OX=9606 GN=NAE1 PE=1 SV=1	NAE1	1	0.000348443	78.505	K(1)DHSHTPWIVIIAK	4	1.716	1	0.714	0.638	0.696	1.222	1.184	1.254	cytoplasm	GO:0044700 single organism signaling; GO:0010941 regulation of cell death; GO:0070997 neuron death; GO:0043523 regulation of neuron apoptotic process; GO:0044699 single-organism process; GO:0010564 regulation of cell cycle process; GO:0044237 cellular metabolic process; GO:0045930 negative regulation of mitotic cell cycle; GO:0007165 signal transduction; GO:0008152 metabolic process; GO:0044774 m…	GO:0016020 membrane; GO:0071944 cell periphery; GO:0044464 cell part; GO:0005622 intracellular; GO:0005737 cytoplasm; GO:0044424 intracellular part; GO:0005623 cell; GO:0005886 plasma membrane;	GO:0008641 small protein activating enzyme activity; GO:0019781 NEDD8 activating enzyme activity; GO:0031625 ubiquitin protein ligase binding; GO:0046982 protein heterodimerization activity; GO:0003824 catalytic activity; GO:0005488 binding; GO:0046983 protein dimerization activity; GO:0016874 ligase activity; GO:0016877 ligase activity, forming carbon-sulfur bonds; GO:0005515 protein binding; GO…	K04532	NAE1, APPBP1; amyloid beta precursor protein binding protein 1	hsa05010 Alzheimer disease	IPR000594; IPR016040;	THIF-type NAD/FAD binding fold; NAD(P)-binding domain;
Q9Y4C1	394	0.051	Down	0.0065788	K	Lysine-specific demethylase 3A OS=Homo sapiens OX=9606 GN=KDM3A PE=1 SV=4	KDM3A	1	2.7563e-08	109.55	GSCTQPK(1)TNTDQENR	2	-0.4553	2	2.311	2.263	2.376	0.069	0.155	0.131	nucleus	GO:0044700 single organism signaling; GO:0022414 reproductive process; GO:0097659 nucleic acid-templated transcription; GO:0016577 histone demethylation; GO:0009891 positive regulation of biosynthetic process; GO:0036123 histone H3-K9 dimethylation; GO:0044237 cellular metabolic process; GO:0008152 metabolic process; GO:0008213 protein alkylation; GO:0007286 spermatid development; GO:0044702 sing…	GO:0043229 intracellular organelle; GO:0016020 membrane; GO:0043232 intracellular non-membrane-bounded organelle; GO:0044446 intracellular organelle part; GO:0005737 cytoplasm; GO:0031981 nuclear lumen; GO:0044424 intracellular part; GO:0005623 cell; GO:0044422 organelle part; GO:0044427 chromosomal part; GO:0043228 non-membrane-bounded organelle; GO:0043226 organelle; GO:0043231 intracellular me…	GO:0031490 chromatin DNA binding; GO:0005102 receptor binding; GO:0003690 double-stranded DNA binding; GO:0005515 protein binding; GO:0050681 androgen receptor binding; GO:0051427 hormone receptor binding; GO:0003682 chromatin binding; GO:0003700 transcription factor activity, sequence-specific DNA binding; GO:0001047 core promoter binding; GO:0000975 regulatory region DNA binding; GO:1901363 het…	K15601	KDM3; lysine-specific demethylase 3 [EC:1.14.11.-]	hsa04714 Thermogenesis	IPR003347;	JmjC domain;
Q05086	30	1.55	Up	0.0156587	K	Ubiquitin-protein ligase E3A OS=Homo sapiens OX=9606 GN=UBE3A PE=1 SV=4	UBE3A	1	0.00220051	77.662	AAAK(1)HLIER	3	0.43631	1	0.706	0.91	0.653	1.279	1.144	1.093	cytoplasm	GO:0044700 single organism signaling; GO:0032270 positive regulation of cellular protein metabolic process; GO:0048732 gland development; GO:0022414 reproductive process; GO:0007420 brain development; GO:0009891 positive regulation of biosynthetic process; GO:0051865 protein autoubiquitination; GO:0044237 cellular metabolic process; GO:0008152 metabolic process; GO:0044702 single organism reprodu…	GO:0043229 intracellular organelle; GO:0000502 proteasome complex; GO:0005737 cytoplasm; GO:0032991 macromolecular complex; GO:0044424 intracellular part; GO:0005829 cytosol; GO:0005623 cell; GO:1905369 endopeptidase complex; GO:0043226 organelle; GO:0043231 intracellular membrane-bounded organelle; GO:0005634 nucleus; GO:1902494 catalytic complex; GO:0005622 intracellular; GO:0044464 cell part; …	GO:0019787 ubiquitin-like protein transferase activity; GO:0043167 ion binding; GO:0005515 protein binding; GO:0061659 ubiquitin-like protein ligase activity; GO:0003712 transcription cofactor activity; GO:0061630 ubiquitin protein ligase activity; GO:0003824 catalytic activity; GO:0005488 binding; GO:0004842 ubiquitin-protein transferase activity; GO:0000989 transcription factor activity, transc…	K10587	UBE3A, E6AP; ubiquitin-protein ligase E3 A [EC:2.3.2.26]	hsa04120 Ubiquitin mediated proteolysis; hsa05165 Human papillomavirus infection; hsa05203 Viral carcinogenesis	IPR032353; IPR000569;	Ubiquitin-protein ligase E3A, N-terminal zinc-binding domain; HECT domain;
Q6NZY4	160	0.612	Down	0.0091042	K	Zinc finger CCHC domain-containing protein 8 OS=Homo sapiens OX=9606 GN=ZCCHC8 PE=1 SV=2	ZCCHC8	1	0.00370852	62.466	VEESCAIK(1)NNK	3	-1.5192	1	1.425	1.257	1.238	0.758	0.689	0.951	nucleus	GO:0006396 RNA processing; GO:0006725 cellular aromatic compound metabolic process; GO:1901360 organic cyclic compound metabolic process; GO:0006807 nitrogen compound metabolic process; GO:0044238 primary metabolic process; GO:0044237 cellular metabolic process; GO:0071704 organic substance metabolic process; GO:0006397 mRNA processing; GO:0016070 RNA metabolic process; GO:0000398 mRNA splicing, …	GO:0043229 intracellular organelle; GO:0044446 intracellular organelle part; GO:0032991 macromolecular complex; GO:0031981 nuclear lumen; GO:0044424 intracellular part; GO:0005681 spliceosomal complex; GO:0016604 nuclear body; GO:0005623 cell; GO:0044422 organelle part; GO:0043226 organelle; GO:0043231 intracellular membrane-bounded organelle; GO:0031974 membrane-enclosed lumen; GO:1902494 cataly…	GO:0097159 organic cyclic compound binding; GO:1901363 heterocyclic compound binding; GO:0003723 RNA binding; GO:0046914 transition metal ion binding; GO:0005488 binding; GO:0043167 ion binding; GO:0003676 nucleic acid binding; GO:0043169 cation binding; GO:0046872 metal ion binding; GO:0005515 protein binding; GO:0008270 zinc ion binding;	K13128	ZCCHC8; zinc finger CCHC domain-containing protein 8		IPR006568; IPR001878;	PSP, proline-rich; Zinc finger, CCHC-type;
Q9NP80	151	0.597	Down	0.0009213	K	Calcium-independent phospholipase A2-gamma OS=Homo sapiens OX=9606 GN=PNPLA8 PE=1 SV=1	PNPLA8	1	0.0190903	54.539	QK(1)NIK(1)QAIK	2	-0.73579	1	1.274	1.379	1.316	0.83	0.832	0.706	mitochondria	GO:0046717 acid secretion; GO:0046470 phosphatidylcholine metabolic process; GO:0046486 glycerolipid metabolic process; GO:0016053 organic acid biosynthetic process; GO:1901568 fatty acid derivative metabolic process; GO:0044699 single-organism process; GO:0009058 biosynthetic process; GO:0044255 cellular lipid metabolic process; GO:0044237 cellular metabolic process; GO:0006796 phosphate-contain…	GO:0016020 membrane; GO:0042175 nuclear outer membrane-endoplasmic reticulum membrane network; GO:0005783 endoplasmic reticulum; GO:0031090 organelle membrane; GO:0005737 cytoplasm; GO:0044438 microbody part; GO:0031224 intrinsic component of membrane; GO:0044424 intracellular part; GO:0005623 cell; GO:0044422 organelle part; GO:0005778 peroxisomal membrane; GO:0044425 membrane part; GO:0005622 i…	GO:0005524 ATP binding; GO:0052689 carboxylic ester hydrolase activity; GO:1901265 nucleoside phosphate binding; GO:0001882 nucleoside binding; GO:0043167 ion binding; GO:0016787 hydrolase activity; GO:0000166 nucleotide binding; GO:0016298 lipase activity; GO:0047499 calcium-independent phospholipase A2 activity; GO:0097159 organic cyclic compound binding; GO:1901363 heterocyclic compound bindin…	K16815	PNPLA8; calcium-independent phospholipase A2-gamma		IPR016035; IPR002641;	Acyl transferase/acyl hydrolase/lysophospholipase; Patatin/Phospholipase A2-related;
Q9NP80	148	0.597	Down	0.0009213	K	Calcium-independent phospholipase A2-gamma OS=Homo sapiens OX=9606 GN=PNPLA8 PE=1 SV=1	PNPLA8	1	0.0190903	54.539	QK(1)NIK(1)QAIK	2	-0.73579	1	1.274	1.379	1.316	0.83	0.832	0.706	mitochondria	GO:0046717 acid secretion; GO:0046470 phosphatidylcholine metabolic process; GO:0046486 glycerolipid metabolic process; GO:0016053 organic acid biosynthetic process; GO:1901568 fatty acid derivative metabolic process; GO:0044699 single-organism process; GO:0009058 biosynthetic process; GO:0044255 cellular lipid metabolic process; GO:0044237 cellular metabolic process; GO:0006796 phosphate-contain…	GO:0016020 membrane; GO:0042175 nuclear outer membrane-endoplasmic reticulum membrane network; GO:0005783 endoplasmic reticulum; GO:0031090 organelle membrane; GO:0005737 cytoplasm; GO:0044438 microbody part; GO:0031224 intrinsic component of membrane; GO:0044424 intracellular part; GO:0005623 cell; GO:0044422 organelle part; GO:0005778 peroxisomal membrane; GO:0044425 membrane part; GO:0005622 i…	GO:0005524 ATP binding; GO:0052689 carboxylic ester hydrolase activity; GO:1901265 nucleoside phosphate binding; GO:0001882 nucleoside binding; GO:0043167 ion binding; GO:0016787 hydrolase activity; GO:0000166 nucleotide binding; GO:0016298 lipase activity; GO:0047499 calcium-independent phospholipase A2 activity; GO:0097159 organic cyclic compound binding; GO:1901363 heterocyclic compound bindin…	K16815	PNPLA8; calcium-independent phospholipase A2-gamma		IPR016035; IPR002641;	Acyl transferase/acyl hydrolase/lysophospholipase; Patatin/Phospholipase A2-related;
Q7Z4G1	57	0.353	Down	0.00067937	K	COMM domain-containing protein 6 OS=Homo sapiens OX=9606 GN=COMMD6 PE=1 SV=1	COMMD6	1	0.00254286	66.267	VADHSGQVK(1)TK	3	-0.37625	1	1.73	1.707	1.482	0.567	0.682	0.485	cytoplasm	GO:0050794 regulation of cellular process; GO:0043433 negative regulation of sequence-specific DNA binding transcription factor activity; GO:0006725 cellular aromatic compound metabolic process; GO:0097659 nucleic acid-templated transcription; GO:0060255 regulation of macromolecule metabolic process; GO:0019219 regulation of nucleobase-containing compound metabolic process; GO:0009058 biosyntheti…	GO:0043226 organelle; GO:0043231 intracellular membrane-bounded organelle; GO:0043229 intracellular organelle; GO:0005634 nucleus; GO:0044464 cell part; GO:0005622 intracellular; GO:0005737 cytoplasm; GO:0044424 intracellular part; GO:0043227 membrane-bounded organelle; GO:0005623 cell;	GO:0051059 NF-kappaB binding; GO:0005515 protein binding; GO:0005488 binding; GO:0008134 transcription factor binding;	K22562			IPR017920;	COMM domain;
Q8N6H7	105	0.393	Down	0.021417	K	ADP-ribosylation factor GTPase-activating protein 2 OS=Homo sapiens OX=9606 GN=ARFGAP2 PE=1 SV=1	ARFGAP2	1	3.36963e-23	154.46	QHGCTANDANTK(1)YNSR	3	-0.86031	1	1.207	1.57	1.931	0.628	0.615	0.605	nucleus	GO:0046907 intracellular transport; GO:0043547 positive regulation of GTPase activity; GO:0016192 vesicle-mediated transport; GO:0048193 Golgi vesicle transport; GO:0071702 organic substance transport; GO:0015031 protein transport; GO:0051641 cellular localization; GO:0043085 positive regulation of catalytic activity; GO:0051234 establishment of localization; GO:0045184 establishment of protein l…	GO:0043229 intracellular organelle; GO:0016020 membrane; GO:0098588 bounding membrane of organelle; GO:0031090 organelle membrane; GO:0071944 cell periphery; GO:0044446 intracellular organelle part; GO:0005737 cytoplasm; GO:0000139 Golgi membrane; GO:0012505 endomembrane system; GO:0044424 intracellular part; GO:0005829 cytosol; GO:0005623 cell; GO:0044422 organelle part; GO:0005886 plasma membra…	GO:0030234 enzyme regulator activity; GO:0060589 nucleoside-triphosphatase regulator activity; GO:0005488 binding; GO:0030695 GTPase regulator activity; GO:0043167 ion binding; GO:0043169 cation binding; GO:0046872 metal ion binding; GO:0098772 molecular function regulator; GO:0008047 enzyme activator activity; GO:0005096 GTPase activator activity;	K12493	ARFGAP2_3; ADP-ribosylation factor GTPase-activating protein 2/3	hsa04144 Endocytosis
P51991	199	0.513	Down	3.0466e-06	K	Heterogeneous nuclear ribonucleoprotein A3 OS=Homo sapiens OX=9606 GN=HNRNPA3 PE=1 SV=2	HNRNPA3	1	8.09419e-15	145.29	YHTINGHNCEVK(1)K	4	-0.83514	8	1.378	1.42	1.449	0.732	0.741	0.704	nucleus	GO:0050658 RNA transport; GO:0006725 cellular aromatic compound metabolic process; GO:0051028 mRNA transport; GO:0044237 cellular metabolic process; GO:0051236 establishment of RNA localization; GO:0071704 organic substance metabolic process; GO:0051234 establishment of localization; GO:0000398 mRNA splicing, via spliceosome; GO:0008152 metabolic process; GO:0000377 RNA splicing, via transesterif…	GO:0005737 cytoplasm; GO:0032991 macromolecular complex; GO:0044424 intracellular part; GO:0005623 cell; GO:0044422 organelle part; GO:0043228 non-membrane-bounded organelle; GO:0031974 membrane-enclosed lumen; GO:1902494 catalytic complex; GO:0005654 nucleoplasm; GO:0070013 intracellular organelle lumen; GO:0005622 intracellular; GO:0044464 cell part; GO:0043005 neuron projection; GO:0043227 mem…	GO:0003723 RNA binding; GO:1901265 nucleoside phosphate binding; GO:0022884 macromolecule transmembrane transporter activity; GO:0051033 RNA transmembrane transporter activity; GO:0022892 substrate-specific transporter activity; GO:0005515 protein binding; GO:0000166 nucleotide binding; GO:0051032 nucleic acid transmembrane transporter activity; GO:0022891 substrate-specific transmembrane transpo…	K12741	HNRNPA1_3; heterogeneous nuclear ribonucleoprotein A1/A3	hsa03040 Spliceosome	IPR000504; IPR012677;	RNA recognition motif domain; Nucleotide-binding alpha-beta plait domain;
Q96GA3	453	3.465	Up	4.4219e-05	K	Protein LTV1 homolog OS=Homo sapiens OX=9606 GN=LTV1 PE=1 SV=1	LTV1	1	0.0151652	64.121	ANK(1)LAFK(1)LEK	2	0.14049	1	0.392	0.458	0.367	1.39	1.44	1.387	nucleus	GO:0051640 organelle localization; GO:0050658 RNA transport; GO:0044085 cellular component biogenesis; GO:0046907 intracellular transport; GO:0022613 ribonucleoprotein complex biogenesis; GO:0033750 ribosome localization; GO:0006725 cellular aromatic compound metabolic process; GO:0033753 establishment of ribosome localization; GO:0051169 nuclear transport; GO:0051168 nuclear export; GO:0071428 r…	GO:0016020 membrane; GO:0031410 cytoplasmic vesicle; GO:0031090 organelle membrane; GO:0098796 membrane protein complex; GO:0005737 cytoplasm; GO:0031982 vesicle; GO:0044433 cytoplasmic vesicle part; GO:0032991 macromolecular complex; GO:0044424 intracellular part; GO:0005623 cell; GO:0030688 preribosome, small subunit precursor; GO:0044422 organelle part; GO:0030684 preribosome; GO:0031974 membr…	GO:0005515 protein binding; GO:0005488 binding;	K14798	LTV1; protein LTV1
Q96GA3	449	3.465	Up	4.4219e-05	K	Protein LTV1 homolog OS=Homo sapiens OX=9606 GN=LTV1 PE=1 SV=1	LTV1	1	0.0151652	64.121	ANK(1)LAFK(1)LEK	2	0.14049	1	0.392	0.458	0.367	1.39	1.44	1.387	nucleus	GO:0051640 organelle localization; GO:0050658 RNA transport; GO:0044085 cellular component biogenesis; GO:0046907 intracellular transport; GO:0022613 ribonucleoprotein complex biogenesis; GO:0033750 ribosome localization; GO:0006725 cellular aromatic compound metabolic process; GO:0033753 establishment of ribosome localization; GO:0051169 nuclear transport; GO:0051168 nuclear export; GO:0071428 r…	GO:0016020 membrane; GO:0031410 cytoplasmic vesicle; GO:0031090 organelle membrane; GO:0098796 membrane protein complex; GO:0005737 cytoplasm; GO:0031982 vesicle; GO:0044433 cytoplasmic vesicle part; GO:0032991 macromolecular complex; GO:0044424 intracellular part; GO:0005623 cell; GO:0030688 preribosome, small subunit precursor; GO:0044422 organelle part; GO:0030684 preribosome; GO:0031974 membr…	GO:0005515 protein binding; GO:0005488 binding;	K14798	LTV1; protein LTV1
P08195	266	1.608	Up	0.00037925	K	4F2 cell-surface antigen heavy chain OS=Homo sapiens OX=9606 GN=SLC3A2 PE=1 SV=3	SLC3A2	1	3.45387e-05	99.788	GLVLGPIHK(1)NQK	3	-0.25361	1	0.772	0.719	0.718	1.155	1.268	1.129	endoplasmic reticulum	GO:1901606 alpha-amino acid catabolic process; GO:0051674 localization of cell; GO:0043090 amino acid import; GO:0044699 single-organism process; GO:0044237 cellular metabolic process; GO:0051234 establishment of localization; GO:0008152 metabolic process; GO:0006520 cellular amino acid metabolic process; GO:0006569 tryptophan catabolic process; GO:0006586 indolalkylamine metabolic process; GO:19…	GO:0016020 membrane; GO:0044421 extracellular region part; GO:0016324 apical plasma membrane; GO:0031410 cytoplasmic vesicle; GO:0071944 cell periphery; GO:0005737 cytoplasm; GO:0031982 vesicle; GO:0031224 intrinsic component of membrane; GO:0044424 intracellular part; GO:0005623 cell; GO:0048770 pigment granule; GO:0070062 extracellular exosome; GO:0098590 plasma membrane region; GO:0044464 cell…	GO:0022892 substrate-specific transporter activity; GO:0015077 monovalent inorganic cation transmembrane transporter activity; GO:0005515 protein binding; GO:0015297 antiporter activity; GO:0022891 substrate-specific transmembrane transporter activity; GO:0099516 ion antiporter activity; GO:1901363 heterocyclic compound binding; GO:0097159 organic cyclic compound binding; GO:0015175 neutral amino…	K06519	SLC3A2, MDU1, CD98; solute carrier family 3, member 2	hsa04150 mTOR signaling pathway; hsa04216 Ferroptosis; hsa04974 Protein digestion and absorption	IPR013780; IPR031984; IPR017853; IPR013781; IPR006047;	Glycosyl hydrolase, all-beta; Solute carrier family 3 member 2, N-terminal domain; Glycoside hydrolase superfamily; Glycoside hydrolase, catalytic domain; Glycosyl hydrolase, family 13, catalytic domain;
Q13907	37	0.507	Down	2.3258e-06	K	Isopentenyl-diphosphate Delta-isomerase 1 OS=Homo sapiens OX=9606 GN=IDI1 PE=1 SV=2	IDI1	1	0.00103222	79.492	K(1)NCHLNENIEK	3	-1.7141	1	1.369	1.431	1.463	0.719	0.716	0.728	cytoplasm	GO:1901615 organic hydroxy compound metabolic process; GO:1902652 secondary alcohol metabolic process; GO:0006066 alcohol metabolic process; GO:1902653 secondary alcohol biosynthetic process; GO:0008654 phospholipid biosynthetic process; GO:0044699 single-organism process; GO:0009058 biosynthetic process; GO:0044255 cellular lipid metabolic process; GO:0016125 sterol metabolic process; GO:0044237…	GO:0043226 organelle; GO:0043231 intracellular membrane-bounded organelle; GO:0043229 intracellular organelle; GO:0044464 cell part; GO:0005622 intracellular; GO:0005777 peroxisome; GO:0042579 microbody; GO:0005737 cytoplasm; GO:0044424 intracellular part; GO:0005829 cytosol; GO:0005623 cell; GO:0043227 membrane-bounded organelle; GO:0044444 cytoplasmic part;	GO:0000287 magnesium ion binding; GO:0004452 isopentenyl-diphosphate delta-isomerase activity; GO:0016853 isomerase activity; GO:0046914 transition metal ion binding; GO:0003824 catalytic activity; GO:0005488 binding; GO:0043167 ion binding; GO:0046872 metal ion binding; GO:0043169 cation binding; GO:0016787 hydrolase activity; GO:0016860 intramolecular oxidoreductase activity; GO:0030145 mangane…	K01823	idi, IDI; isopentenyl-diphosphate Delta-isomerase [EC:5.3.3.2]	hsa00900 Terpenoid backbone biosynthesis; hsa01100 Metabolic pathways	IPR015797; IPR000086;	NUDIX hydrolase domain-like; NUDIX hydrolase domain;
Q12904	296	0.526	Down	1.55142e-05	K	Aminoacyl tRNA synthase complex-interacting multifunctional protein 1 OS=Homo sapiens OX=9606 GN=AIMP1 PE=1 SV=2	AIMP1	1	0.00357515	85.355	GVPFEVK(1)GK	2	-1.2177	2	1.377	1.423	1.399	0.716	0.724	0.768	cytoplasm	GO:0044700 single organism signaling; GO:0006518 peptide metabolic process; GO:0051674 localization of cell; GO:0001568 blood vessel development; GO:0098542 defense response to other organism; GO:0044699 single-organism process; GO:0009058 biosynthetic process; GO:0044764 multi-organism cellular process; GO:0044237 cellular metabolic process; GO:0009607 response to biotic stimulus; GO:0008285 neg…	GO:0097708 intracellular vesicle; GO:0043229 intracellular organelle; GO:0016020 membrane; GO:0005615 extracellular space; GO:0044421 extracellular region part; GO:0005783 endoplasmic reticulum; GO:0031410 cytoplasmic vesicle; GO:0017102 methionyl glutamyl tRNA synthetase complex; GO:0031982 vesicle; GO:0005737 cytoplasm; GO:0032991 macromolecular complex; GO:0012505 endomembrane system; GO:00444…	GO:0097159 organic cyclic compound binding; GO:1901363 heterocyclic compound binding; GO:0003723 RNA binding; GO:0005125 cytokine activity; GO:0042802 identical protein binding; GO:0000049 tRNA binding; GO:0005102 receptor binding; GO:0042803 protein homodimerization activity; GO:0005488 binding; GO:0046983 protein dimerization activity; GO:0003676 nucleic acid binding; GO:0005515 protein binding…	K15437	AIMP1, ARC1; aminoacyl tRNA synthase complex-interacting multifunctional protein 1		IPR012340; IPR002547;	Nucleic acid-binding, OB-fold; tRNA-binding domain;
P43686	212	0.662	Down	0.00103772	K	26S proteasome regulatory subunit 6B OS=Homo sapiens OX=9606 GN=PSMC4 PE=1 SV=2	PSMC4	1	4.25551e-05	89.911	GVLMYGPPGCGK(1)TMLAK	3	0.20065	1	1.173	1.303	1.291	0.774	0.864	0.854	cytoplasm	GO:0044700 single organism signaling; GO:0010608 posttranscriptional regulation of gene expression; GO:0043009 chordate embryonic development; GO:0051443 positive regulation of ubiquitin-protein transferase activity; GO:0009891 positive regulation of biosynthetic process; GO:0031347 regulation of defense response; GO:0010564 regulation of cell cycle process; GO:0044237 cellular metabolic process;…	GO:0016020 membrane; GO:0005838 proteasome regulatory particle; GO:0005737 cytoplasm; GO:0032991 macromolecular complex; GO:0044424 intracellular part; GO:0005623 cell; GO:0044422 organelle part; GO:1905369 endopeptidase complex; GO:0031974 membrane-enclosed lumen; GO:1902494 catalytic complex; GO:0005654 nucleoplasm; GO:0070013 intracellular organelle lumen; GO:0022624 proteasome accessory compl…	GO:1901265 nucleoside phosphate binding; GO:0016817 hydrolase activity, acting on acid anhydrides; GO:0016787 hydrolase activity; GO:0005515 protein binding; GO:0016887 ATPase activity; GO:0097159 organic cyclic compound binding; GO:1901363 heterocyclic compound binding; GO:0016462 pyrophosphatase activity; GO:0032553 ribonucleotide binding; GO:0003824 catalytic activity; GO:0005488 binding; GO:0…	K03063	PSMC4, RPT3; 26S proteasome regulatory subunit T3	hsa03050 Proteasome; hsa05169 Epstein-Barr virus infection	IPR003593; IPR003959; IPR027417;	AAA+ ATPase domain; ATPase, AAA-type, core; P-loop containing nucleoside triphosphate hydrolase;
Q5T200	1640	0.304	Down	0.00036098	K	Zinc finger CCCH domain-containing protein 13 OS=Homo sapiens OX=9606 GN=ZC3H13 PE=1 SV=1	ZC3H13	1	0.00311386	66.393	K(1)TTCHAPGHEK	4	0.045802	1	1.499	1.878	1.763	0.475	0.611	0.479	nucleus		GO:0043229 intracellular organelle; GO:0044446 intracellular organelle part; GO:0031981 nuclear lumen; GO:0044424 intracellular part; GO:0016604 nuclear body; GO:0005623 cell; GO:0044422 organelle part; GO:0043226 organelle; GO:0043231 intracellular membrane-bounded organelle; GO:0031974 membrane-enclosed lumen; GO:0005654 nucleoplasm; GO:0005634 nucleus; GO:0070013 intracellular organelle lumen;…	GO:0097159 organic cyclic compound binding; GO:1901363 heterocyclic compound binding; GO:0003723 RNA binding; GO:0005488 binding; GO:0003676 nucleic acid binding; GO:0043167 ion binding; GO:0043169 cation binding; GO:0046872 metal ion binding; GO:0005515 protein binding;	K22909			IPR000571;	Zinc finger, CCCH-type;
P39023	155	0.53	Down	2.1524e-05	K	60S ribosomal protein L3 OS=Homo sapiens OX=9606 GN=RPL3 PE=1 SV=2	RPL3	1	0.0383226	76.774	K(1)YCQVIR	2	-0.20345	2	1.428	1.386	1.372	0.71	0.734	0.775	cytoplasm	GO:0044085 cellular component biogenesis; GO:0022613 ribonucleoprotein complex biogenesis; GO:0072594 establishment of protein localization to organelle; GO:0006518 peptide metabolic process; GO:0009058 biosynthetic process; GO:0044764 multi-organism cellular process; GO:0044237 cellular metabolic process; GO:0071345 cellular response to cytokine stimulus; GO:0015031 protein transport; GO:0051234…	GO:0044421 extracellular region part; GO:0030054 cell junction; GO:0031982 vesicle; GO:0005737 cytoplasm; GO:0032991 macromolecular complex; GO:0044424 intracellular part; GO:0005623 cell; GO:0044422 organelle part; GO:0043228 non-membrane-bounded organelle; GO:0070062 extracellular exosome; GO:0031974 membrane-enclosed lumen; GO:0005925 focal adhesion; GO:0070013 intracellular organelle lumen; G…	GO:0097159 organic cyclic compound binding; GO:1901363 heterocyclic compound binding; GO:0003723 RNA binding; GO:0008097 5S rRNA binding; GO:0005488 binding; GO:0003676 nucleic acid binding; GO:0005515 protein binding; GO:0005198 structural molecule activity; GO:0003735 structural constituent of ribosome; GO:0019843 rRNA binding;	K02925	RP-L3e, RPL3; large subunit ribosomal protein L3e	hsa03010 Ribosome	IPR009000;	Translation protein, beta-barrel domain;
P39023	341	0.377	Down	5.9053e-05	K	60S ribosomal protein L3 OS=Homo sapiens OX=9606 GN=RPL3 PE=1 SV=2	RPL3	1	0.0219442	76.679	GCVVGTK(1)K	3	-1.1525	2	1.633	1.637	1.526	0.635	0.545	0.63	cytoplasm	GO:0044085 cellular component biogenesis; GO:0022613 ribonucleoprotein complex biogenesis; GO:0072594 establishment of protein localization to organelle; GO:0006518 peptide metabolic process; GO:0009058 biosynthetic process; GO:0044764 multi-organism cellular process; GO:0044237 cellular metabolic process; GO:0071345 cellular response to cytokine stimulus; GO:0015031 protein transport; GO:0051234…	GO:0044421 extracellular region part; GO:0030054 cell junction; GO:0031982 vesicle; GO:0005737 cytoplasm; GO:0032991 macromolecular complex; GO:0044424 intracellular part; GO:0005623 cell; GO:0044422 organelle part; GO:0043228 non-membrane-bounded organelle; GO:0070062 extracellular exosome; GO:0031974 membrane-enclosed lumen; GO:0005925 focal adhesion; GO:0070013 intracellular organelle lumen; G…	GO:0097159 organic cyclic compound binding; GO:1901363 heterocyclic compound binding; GO:0003723 RNA binding; GO:0008097 5S rRNA binding; GO:0005488 binding; GO:0003676 nucleic acid binding; GO:0005515 protein binding; GO:0005198 structural molecule activity; GO:0003735 structural constituent of ribosome; GO:0019843 rRNA binding;	K02925	RP-L3e, RPL3; large subunit ribosomal protein L3e	hsa03010 Ribosome	IPR009000;	Translation protein, beta-barrel domain;
P39023	136	0.473	Down	1.7225e-05	K	60S ribosomal protein L3 OS=Homo sapiens OX=9606 GN=RPL3 PE=1 SV=2	RPL3	1	0.00322946	107.79	K(1)WQDEDGK	2	0.81854	2	1.454	1.503	1.438	0.696	0.723	0.66	cytoplasm	GO:0044085 cellular component biogenesis; GO:0022613 ribonucleoprotein complex biogenesis; GO:0072594 establishment of protein localization to organelle; GO:0006518 peptide metabolic process; GO:0009058 biosynthetic process; GO:0044764 multi-organism cellular process; GO:0044237 cellular metabolic process; GO:0071345 cellular response to cytokine stimulus; GO:0015031 protein transport; GO:0051234…	GO:0044421 extracellular region part; GO:0030054 cell junction; GO:0031982 vesicle; GO:0005737 cytoplasm; GO:0032991 macromolecular complex; GO:0044424 intracellular part; GO:0005623 cell; GO:0044422 organelle part; GO:0043228 non-membrane-bounded organelle; GO:0070062 extracellular exosome; GO:0031974 membrane-enclosed lumen; GO:0005925 focal adhesion; GO:0070013 intracellular organelle lumen; G…	GO:0097159 organic cyclic compound binding; GO:1901363 heterocyclic compound binding; GO:0003723 RNA binding; GO:0008097 5S rRNA binding; GO:0005488 binding; GO:0003676 nucleic acid binding; GO:0005515 protein binding; GO:0005198 structural molecule activity; GO:0003735 structural constituent of ribosome; GO:0019843 rRNA binding;	K02925	RP-L3e, RPL3; large subunit ribosomal protein L3e	hsa03010 Ribosome	IPR009000;	Translation protein, beta-barrel domain;
P39023	154	0.576	Down	3.8194e-05	K	60S ribosomal protein L3 OS=Homo sapiens OX=9606 GN=RPL3 PE=1 SV=2	RPL3	1	0.01854	89.355	DFSSMK(1)K	3	0.18564	2	1.407	1.347	1.282	0.773	0.768	0.783	cytoplasm	GO:0044085 cellular component biogenesis; GO:0022613 ribonucleoprotein complex biogenesis; GO:0072594 establishment of protein localization to organelle; GO:0006518 peptide metabolic process; GO:0009058 biosynthetic process; GO:0044764 multi-organism cellular process; GO:0044237 cellular metabolic process; GO:0071345 cellular response to cytokine stimulus; GO:0015031 protein transport; GO:0051234…	GO:0044421 extracellular region part; GO:0030054 cell junction; GO:0031982 vesicle; GO:0005737 cytoplasm; GO:0032991 macromolecular complex; GO:0044424 intracellular part; GO:0005623 cell; GO:0044422 organelle part; GO:0043228 non-membrane-bounded organelle; GO:0070062 extracellular exosome; GO:0031974 membrane-enclosed lumen; GO:0005925 focal adhesion; GO:0070013 intracellular organelle lumen; G…	GO:0097159 organic cyclic compound binding; GO:1901363 heterocyclic compound binding; GO:0003723 RNA binding; GO:0008097 5S rRNA binding; GO:0005488 binding; GO:0003676 nucleic acid binding; GO:0005515 protein binding; GO:0005198 structural molecule activity; GO:0003735 structural constituent of ribosome; GO:0019843 rRNA binding;	K02925	RP-L3e, RPL3; large subunit ribosomal protein L3e	hsa03010 Ribosome	IPR009000;	Translation protein, beta-barrel domain;
P39023	115	1.601	Up	0.00150122	K	60S ribosomal protein L3 OS=Homo sapiens OX=9606 GN=RPL3 PE=1 SV=2	RPL3	1	0.000290809	84.734	TVFAEHISDECK(1)R	3	-0.2477	1	0.682	0.738	0.796	1.244	1.216	1.088	cytoplasm	GO:0044085 cellular component biogenesis; GO:0022613 ribonucleoprotein complex biogenesis; GO:0072594 establishment of protein localization to organelle; GO:0006518 peptide metabolic process; GO:0009058 biosynthetic process; GO:0044764 multi-organism cellular process; GO:0044237 cellular metabolic process; GO:0071345 cellular response to cytokine stimulus; GO:0015031 protein transport; GO:0051234…	GO:0044421 extracellular region part; GO:0030054 cell junction; GO:0031982 vesicle; GO:0005737 cytoplasm; GO:0032991 macromolecular complex; GO:0044424 intracellular part; GO:0005623 cell; GO:0044422 organelle part; GO:0043228 non-membrane-bounded organelle; GO:0070062 extracellular exosome; GO:0031974 membrane-enclosed lumen; GO:0005925 focal adhesion; GO:0070013 intracellular organelle lumen; G…	GO:0097159 organic cyclic compound binding; GO:1901363 heterocyclic compound binding; GO:0003723 RNA binding; GO:0008097 5S rRNA binding; GO:0005488 binding; GO:0003676 nucleic acid binding; GO:0005515 protein binding; GO:0005198 structural molecule activity; GO:0003735 structural constituent of ribosome; GO:0019843 rRNA binding;	K02925	RP-L3e, RPL3; large subunit ribosomal protein L3e	hsa03010 Ribosome	IPR009000;	Translation protein, beta-barrel domain;
P39023	66	1.637	Up	1.8678e-05	K	60S ribosomal protein L3 OS=Homo sapiens OX=9606 GN=RPL3 PE=1 SV=2	RPL3	1	0.0020035	71.153	EVDRPGSK(1)VNK	3	-0.11062	1	0.705	0.753	0.721	1.174	1.195	1.199	cytoplasm	GO:0044085 cellular component biogenesis; GO:0022613 ribonucleoprotein complex biogenesis; GO:0072594 establishment of protein localization to organelle; GO:0006518 peptide metabolic process; GO:0009058 biosynthetic process; GO:0044764 multi-organism cellular process; GO:0044237 cellular metabolic process; GO:0071345 cellular response to cytokine stimulus; GO:0015031 protein transport; GO:0051234…	GO:0044421 extracellular region part; GO:0030054 cell junction; GO:0031982 vesicle; GO:0005737 cytoplasm; GO:0032991 macromolecular complex; GO:0044424 intracellular part; GO:0005623 cell; GO:0044422 organelle part; GO:0043228 non-membrane-bounded organelle; GO:0070062 extracellular exosome; GO:0031974 membrane-enclosed lumen; GO:0005925 focal adhesion; GO:0070013 intracellular organelle lumen; G…	GO:0097159 organic cyclic compound binding; GO:1901363 heterocyclic compound binding; GO:0003723 RNA binding; GO:0008097 5S rRNA binding; GO:0005488 binding; GO:0003676 nucleic acid binding; GO:0005515 protein binding; GO:0005198 structural molecule activity; GO:0003735 structural constituent of ribosome; GO:0019843 rRNA binding;	K02925	RP-L3e, RPL3; large subunit ribosomal protein L3e	hsa03010 Ribosome	IPR009000;	Translation protein, beta-barrel domain;
P63208	57	0.597	Down	0.00132271	K	S-phase kinase-associated protein 1 OS=Homo sapiens OX=9606 GN=SKP1 PE=1 SV=2	SKP1	1	0.00614248	64.82	K(1)VIQWCTHHK	4	0.12478	1	1.273	1.335	1.362	0.877	0.784	0.708	cytoplasm	GO:0044085 cellular component biogenesis; GO:0044700 single organism signaling; GO:0065008 regulation of biological quality; GO:0032270 positive regulation of cellular protein metabolic process; GO:0002220 innate immune response activating cell surface receptor signaling pathway; GO:0007166 cell surface receptor signaling pathway; GO:0051443 positive regulation of ubiquitin-protein transferase ac…	GO:0044421 extracellular region part; GO:0031982 vesicle; GO:0005737 cytoplasm; GO:0019005 SCF ubiquitin ligase complex; GO:0032991 macromolecular complex; GO:0044424 intracellular part; GO:0005623 cell; GO:0044422 organelle part; GO:0031974 membrane-enclosed lumen; GO:0070062 extracellular exosome; GO:0005654 nucleoplasm; GO:1902494 catalytic complex; GO:0070013 intracellular organelle lumen; GO…	GO:0019787 ubiquitin-like protein transferase activity; GO:0003824 catalytic activity; GO:0005488 binding; GO:0004842 ubiquitin-protein transferase activity; GO:0005515 protein binding; GO:0016740 transferase activity; GO:0097602 cullin family protein binding; GO:0008013 beta-catenin binding;	K03094	SKP1, CBF3D; S-phase kinase-associated protein 1	hsa04110 Cell cycle; hsa04114 Oocyte meiosis; hsa04120 Ubiquitin mediated proteolysis; hsa04141 Protein processing in endoplasmic reticulum; hsa04310 Wnt signaling pathway; hsa04350 TGF-beta signaling pathway; hsa04710 Circadian rhythm; hsa05131 Shigellosis; hsa05170 Human immunodeficiency virus 1 infection; hsa05200 Pathways in cancer	IPR016072; IPR011333; IPR016073;	SKP1 component, dimerisation; SKP1/BTB/POZ domain; SKP1 component, POZ domain;
P63208	66	0.411	Down	3.6657e-05	K	S-phase kinase-associated protein 1 OS=Homo sapiens OX=9606 GN=SKP1 PE=1 SV=2	SKP1	1	2.05841e-10	84.327	VIQWCTHHK(1)DDPPPPEDDENKEK	5	0.029289	1	1.562	1.461	1.627	0.671	0.605	0.633	cytoplasm	GO:0044085 cellular component biogenesis; GO:0044700 single organism signaling; GO:0065008 regulation of biological quality; GO:0032270 positive regulation of cellular protein metabolic process; GO:0002220 innate immune response activating cell surface receptor signaling pathway; GO:0007166 cell surface receptor signaling pathway; GO:0051443 positive regulation of ubiquitin-protein transferase ac…	GO:0044421 extracellular region part; GO:0031982 vesicle; GO:0005737 cytoplasm; GO:0019005 SCF ubiquitin ligase complex; GO:0032991 macromolecular complex; GO:0044424 intracellular part; GO:0005623 cell; GO:0044422 organelle part; GO:0031974 membrane-enclosed lumen; GO:0070062 extracellular exosome; GO:0005654 nucleoplasm; GO:1902494 catalytic complex; GO:0070013 intracellular organelle lumen; GO…	GO:0019787 ubiquitin-like protein transferase activity; GO:0003824 catalytic activity; GO:0005488 binding; GO:0004842 ubiquitin-protein transferase activity; GO:0005515 protein binding; GO:0016740 transferase activity; GO:0097602 cullin family protein binding; GO:0008013 beta-catenin binding;	K03094	SKP1, CBF3D; S-phase kinase-associated protein 1	hsa04110 Cell cycle; hsa04114 Oocyte meiosis; hsa04120 Ubiquitin mediated proteolysis; hsa04141 Protein processing in endoplasmic reticulum; hsa04310 Wnt signaling pathway; hsa04350 TGF-beta signaling pathway; hsa04710 Circadian rhythm; hsa05131 Shigellosis; hsa05170 Human immunodeficiency virus 1 infection; hsa05200 Pathways in cancer	IPR016072; IPR011333; IPR016073;	SKP1 component, dimerisation; SKP1/BTB/POZ domain; SKP1 component, POZ domain;
Q92878	1291	0.388	Down	1.72987e-05	K	DNA repair protein RAD50 OS=Homo sapiens OX=9606 GN=RAD50 PE=1 SV=1	RAD50	1	1.56938e-08	143.98	K(1)NIDQCSEIVK	2	0.59487	1	1.599	1.519	1.629	0.586	0.651	0.605	cytoplasm	GO:0065008 regulation of biological quality; GO:0032270 positive regulation of cellular protein metabolic process; GO:0022414 reproductive process; GO:0016233 telomere capping; GO:0032204 regulation of telomere maintenance; GO:0044237 cellular metabolic process; GO:0008152 metabolic process; GO:0044093 positive regulation of molecular function; GO:0044702 single organism reproductive process; GO:…	GO:0016020 membrane; GO:0000784 nuclear chromosome, telomeric region; GO:0000781 chromosome, telomeric region; GO:0032991 macromolecular complex; GO:0044424 intracellular part; GO:0005623 cell; GO:0044422 organelle part; GO:0044427 chromosomal part; GO:0043228 non-membrane-bounded organelle; GO:0000793 condensed chromosome; GO:0031974 membrane-enclosed lumen; GO:0005654 nucleoplasm; GO:0070013 in…	GO:1901265 nucleoside phosphate binding; GO:0003690 double-stranded DNA binding; GO:0004017 adenylate kinase activity; GO:0019205 nucleobase-containing compound kinase activity; GO:0003697 single-stranded DNA binding; GO:0042162 telomeric DNA binding; GO:0016817 hydrolase activity, acting on acid anhydrides; GO:0005515 protein binding; GO:0016787 hydrolase activity; GO:0019201 nucleotide kinase a…	K10866	RAD50; DNA repair protein RAD50 [EC:3.6.-.-]	hsa03440 Homologous recombination; hsa03450 Non-homologous end-joining; hsa04218 Cellular senescence	IPR013134; IPR027417;	RAD50, zinc hook; P-loop containing nucleoside triphosphate hydrolase;
Q9UPX8	1174	1.904	Up	0.00047943	K	SH3 and multiple ankyrin repeat domains protein 2 OS=Homo sapiens OX=9606 GN=SHANK2 PE=1 SV=3	SHANK2	1	0.0255254	57.281	MK(1)PIIHK	3	-3.76	1	0.718	0.65	0.589	1.296	1.239	1.192	nucleus	GO:0050794 regulation of cellular process; GO:0044085 cellular component biogenesis; GO:0016043 cellular component organization; GO:0044707 single-multicellular organism process; GO:0065008 regulation of biological quality; GO:0023051 regulation of signaling; GO:0060292 long term synaptic depression; GO:0044699 single-organism process; GO:0048519 negative regulation of biological process; GO:0048…	GO:0030425 dendrite; GO:0060170 ciliary membrane; GO:0016020 membrane; GO:0098862 cluster of actin-based cell projections; GO:0005903 brush border; GO:0016324 apical plasma membrane; GO:0031090 organelle membrane; GO:0030054 cell junction; GO:0071944 cell periphery; GO:0005737 cytoplasm; GO:0097730 non-motile cilium; GO:0043025 neuronal cell body; GO:0030426 growth cone; GO:0044424 intracellular …	GO:0035254 glutamate receptor binding; GO:0032947 protein complex scaffold; GO:0005102 receptor binding; GO:0030160 GKAP/Homer scaffold activity; GO:0005488 binding; GO:0030159 receptor signaling complex scaffold activity; GO:0019904 protein domain specific binding; GO:0005515 protein binding; GO:0035255 ionotropic glutamate receptor binding; GO:0017124 SH3 domain binding; GO:0005198 structural m…	K15009	SHANK; SH3 and multiple ankyrin repeat domains protein	hsa04724 Glutamatergic synapse	IPR011511; IPR001452; IPR013761; IPR001660; IPR001478;	Variant SH3 domain; SH3 domain; Sterile alpha motif/pointed domain; Sterile alpha motif domain; PDZ domain;
P47813	56	0.392	Down	0.00122466	K	Eukaryotic translation initiation factor 1A, X-chromosomal OS=Homo sapiens OX=9606 GN=EIF1AX PE=1 SV=2	EIF1AX	1	0.00060676	84.507	LEAMCFDGVK(1)R	2	-0.88273	2	1.781	1.38	1.574	0.548	0.731	0.579	cytoplasm,nucleus	GO:0006518 peptide metabolic process; GO:0043043 peptide biosynthetic process; GO:0044267 cellular protein metabolic process; GO:0006807 nitrogen compound metabolic process; GO:0009058 biosynthetic process; GO:0043603 cellular amide metabolic process; GO:0044238 primary metabolic process; GO:1901566 organonitrogen compound biosynthetic process; GO:0044237 cellular metabolic process; GO:1901576 or…	GO:0044464 cell part; GO:0005622 intracellular; GO:0005737 cytoplasm; GO:0044424 intracellular part; GO:0005829 cytosol; GO:0005623 cell; GO:0044444 cytoplasmic part;	GO:0097159 organic cyclic compound binding; GO:1901363 heterocyclic compound binding; GO:0008135 translation factor activity, RNA binding; GO:0003723 RNA binding; GO:0005488 binding; GO:0003676 nucleic acid binding; GO:0003743 translation initiation factor activity; GO:0005515 protein binding;	K03236	EIF1A; translation initiation factor 1A	hsa03013 RNA transport	IPR012340; IPR006196;	Nucleic acid-binding, OB-fold; RNA-binding domain, S1, IF1 type;
O94979	647	0.456	Down	0.000164778	K	Protein transport protein Sec31A OS=Homo sapiens OX=9606 GN=SEC31A PE=1 SV=3	SEC31A	1	0.00188721	79.492	EIVESCDLK(1)NWR	2	-1.025	1	1.508	1.403	1.547	0.619	0.677	0.736	nucleus	GO:0044700 single organism signaling; GO:0044085 cellular component biogenesis; GO:0006901 vesicle coating; GO:0048207 vesicle targeting, rough ER to cis-Golgi; GO:0048208 COPII vesicle coating; GO:0044699 single-organism process; GO:0015031 protein transport; GO:0030968 endoplasmic reticulum unfolded protein response; GO:0051234 establishment of localization; GO:0007165 signal transduction; GO:0…	GO:0030658 transport vesicle membrane; GO:0016020 membrane; GO:0042175 nuclear outer membrane-endoplasmic reticulum membrane network; GO:0005783 endoplasmic reticulum; GO:0031090 organelle membrane; GO:0031410 cytoplasmic vesicle; GO:0098796 membrane protein complex; GO:0031982 vesicle; GO:0005737 cytoplasm; GO:0044433 cytoplasmic vesicle part; GO:0032991 macromolecular complex; GO:0044424 intrac…	GO:0005515 protein binding; GO:0048306 calcium-dependent protein binding; GO:0005488 binding;	K14005	SEC31; protein transport protein SEC31	hsa04141 Protein processing in endoplasmic reticulum	IPR017986; IPR015943; IPR024298;	WD40-repeat-containing domain; WD40/YVTN repeat-like-containing domain; Ancestral coatomer element 1, Sec16/Sec31;
Q00610	907	0.529	Down	7.9584e-05	K	Clathrin heavy chain 1 OS=Homo sapiens OX=9606 GN=CLTC PE=1 SV=5	CLTC	1	0.00140987	111.61	VVGK(1)YCEK	2	-0.27006	3	1.457	1.43	1.308	0.764	0.714	0.74	cytoplasm	GO:0044700 single organism signaling; GO:0001649 osteoblast differentiation; GO:0032885 regulation of polysaccharide biosynthetic process; GO:0007166 cell surface receptor signaling pathway; GO:0006914 autophagy; GO:0010564 regulation of cell cycle process; GO:0044237 cellular metabolic process; GO:0015031 protein transport; GO:1900126 negative regulation of hyaluronan biosynthetic process; GO:00…	GO:0016020 membrane; GO:0044421 extracellular region part; GO:1990498 mitotic spindle microtubule; GO:0045334 clathrin-coated endocytic vesicle; GO:0031090 organelle membrane; GO:0005737 cytoplasm; GO:0044433 cytoplasmic vesicle part; GO:0032991 macromolecular complex; GO:0032588 trans-Golgi network membrane; GO:0036019 endolysosome; GO:0005623 cell; GO:0099080 supramolecular complex; GO:0044422 …	GO:0097159 organic cyclic compound binding; GO:1901363 heterocyclic compound binding; GO:0003723 RNA binding; GO:0030276 clathrin binding; GO:0003725 double-stranded RNA binding; GO:0005488 binding; GO:0003676 nucleic acid binding; GO:0019901 protein kinase binding; GO:0005515 protein binding; GO:0019900 kinase binding; GO:0005198 structural molecule activity; GO:0019899 enzyme binding; GO:003205…	K04646	CLTC; clathrin heavy chain	hsa04142 Lysosome; hsa04144 Endocytosis; hsa04721 Synaptic vesicle cycle; hsa04961 Endocrine and other factor-regulated calcium reabsorption; hsa05016 Huntington disease; hsa05100 Bacterial invasion of epithelial cells	IPR015348; IPR016025; IPR011990; IPR016024; IPR001473;	Clathrin, heavy chain, linker, core motif; Clathrin, heavy chain, linker/propeller domain; Tetratricopeptide-like helical domain; Armadillo-type fold; Clathrin, heavy chain, propeller, N-terminal;
P12956	591	0.589	Down	5.951e-05	K	X-ray repair cross-complementing protein 6 OS=Homo sapiens OX=9606 GN=XRCC6 PE=1 SV=2	XRCC6	1	0.0039431	83.869	AYGLK(1)SGLK	3	-1.3608	4	1.307	1.277	1.403	0.773	0.78	0.797	cytoplasm	GO:0044085 cellular component biogenesis; GO:0032481 positive regulation of type I interferon production; GO:0065008 regulation of biological quality; GO:0045321 leukocyte activation; GO:0006266 DNA ligation; GO:0019043 establishment of viral latency; GO:0097659 nucleic acid-templated transcription; GO:0007420 brain development; GO:0009891 positive regulation of biosynthetic process; GO:0044237 c…	GO:0016020 membrane; GO:0034774 secretory granule lumen; GO:0070419 nonhomologous end joining complex; GO:0000784 nuclear chromosome, telomeric region; GO:0000781 chromosome, telomeric region; GO:0031410 cytoplasmic vesicle; GO:0000782 telomere cap complex; GO:0031982 vesicle; GO:0005737 cytoplasm; GO:0044433 cytoplasmic vesicle part; GO:0032991 macromolecular complex; GO:0044424 intracellular pa…	GO:1901265 nucleoside phosphate binding; GO:0003690 double-stranded DNA binding; GO:0008026 ATP-dependent helicase activity; GO:0016817 hydrolase activity, acting on acid anhydrides; GO:0042162 telomeric DNA binding; GO:0005515 protein binding; GO:0016787 hydrolase activity; GO:0016835 carbon-oxygen lyase activity; GO:0016887 ATPase activity; GO:0000975 regulatory region DNA binding; GO:1901363 h…	K10884	XRCC6, KU70, G22P1; ATP-dependent DNA helicase 2 subunit 1	hsa03450 Non-homologous end-joining	IPR003034; IPR005161; IPR006164; IPR016194; IPR005160; IPR027388; IPR002035;	SAP domain; Ku70/Ku80, N-terminal alpha/beta; Ku70/Ku80 beta-barrel domain; SPOC-like, C-terminal domain; Ku70/Ku80 C-terminal arm; Ku70, bridge and pillars domain; von Willebrand factor, type A;
Q9BZR9	195	0.528	Down	4.1266e-05	K	E3 ubiquitin-protein ligase TRIM8 OS=Homo sapiens OX=9606 GN=TRIM8 PE=1 SV=2	TRIM8	1	0.0297541	44.377	MLMK(1)QQDR	2	3.8694	1	1.427	1.336	1.43	0.725	0.715	0.774	nucleus	GO:0044700 single organism signaling; GO:0007166 cell surface receptor signaling pathway; GO:0023051 regulation of signaling; GO:0031331 positive regulation of cellular catabolic process; GO:1902533 positive regulation of intracellular signal transduction; GO:0071346 cellular response to interferon-gamma; GO:0044699 single-organism process; GO:0071345 cellular response to cytokine stimulus; GO:00…	GO:0043229 intracellular organelle; GO:0044446 intracellular organelle part; GO:0005737 cytoplasm; GO:0031981 nuclear lumen; GO:0044424 intracellular part; GO:0016604 nuclear body; GO:0005829 cytosol; GO:0005623 cell; GO:0044422 organelle part; GO:0031974 membrane-enclosed lumen; GO:0043231 intracellular membrane-bounded organelle; GO:0043226 organelle; GO:0016605 PML body; GO:0005654 nucleoplasm…	GO:0042802 identical protein binding; GO:0046914 transition metal ion binding; GO:0003824 catalytic activity; GO:0042803 protein homodimerization activity; GO:0005488 binding; GO:0046983 protein dimerization activity; GO:0043167 ion binding; GO:0046872 metal ion binding; GO:0043169 cation binding; GO:0005515 protein binding; GO:0008270 zinc ion binding; GO:0016740 transferase activity;	K12001	TRIM8; tripartite motif-containing protein 8 [EC:2.3.2.27]		IPR001841; IPR013083; IPR000315;	Zinc finger, RING-type; Zinc finger, RING/FYVE/PHD-type; B-box-type zinc finger;
Q8N1W1	979	2.153	Up	2.4419e-05	K	Rho guanine nucleotide exchange factor 28 OS=Homo sapiens OX=9606 GN=ARHGEF28 PE=1 SV=3	ARHGEF28	1	0.026785	64.265	FQNFIK(1)LR	2	-0.53398	1	0.591	0.56	0.631	1.263	1.306	1.268	nucleus	GO:0050794 regulation of cellular process; GO:0044700 single organism signaling; GO:0007166 cell surface receptor signaling pathway; GO:0023051 regulation of signaling; GO:0048869 cellular developmental process; GO:0044699 single-organism process; GO:0046578 regulation of Ras protein signal transduction; GO:0050896 response to stimulus; GO:0030154 cell differentiation; GO:0007165 signal transduct…	GO:0016020 membrane; GO:0071944 cell periphery; GO:0044464 cell part; GO:0005622 intracellular; GO:0005737 cytoplasm; GO:0044424 intracellular part; GO:0005623 cell; GO:0005829 cytosol; GO:0005886 plasma membrane; GO:0044444 cytoplasmic part;	GO:0097159 organic cyclic compound binding; GO:1901363 heterocyclic compound binding; GO:0003723 RNA binding; GO:0005085 guanyl-nucleotide exchange factor activity; GO:0005488 binding; GO:0043167 ion binding; GO:0003676 nucleic acid binding; GO:0046872 metal ion binding; GO:0043169 cation binding; GO:0005088 Ras guanyl-nucleotide exchange factor activity; GO:0098772 molecular function regulator; …	K21072	ARHGEF28; A-kinase anchor protein 28	hsa05135 Yersinia infection	IPR002219; IPR011993; IPR000219; IPR001849;	Protein kinase C-like, phorbol ester/diacylglycerol-binding domain; PH domain-like; Dbl homology (DH) domain; Pleckstrin homology domain;
Q06124	178	0.256	Down	1.83063e-05	K	Tyrosine-protein phosphatase non-receptor type 11 OS=Homo sapiens OX=9606 GN=PTPN11 PE=1 SV=2	PTPN11	1	0.00118893	79.346	CQELK(1)YDVGGGER	2	0.10773	2	1.739	1.852	1.824	0.421	0.505	0.46	cytoplasm	GO:0044700 single organism signaling; GO:0002694 regulation of leukocyte activation; GO:0090130 tissue migration; GO:0048008 platelet-derived growth factor receptor signaling pathway; GO:0022414 reproductive process; GO:0050796 regulation of insulin secretion; GO:0042593 glucose homeostasis; GO:0044255 cellular lipid metabolic process; GO:0031347 regulation of defense response; GO:0044237 cellula…	GO:0043226 organelle; GO:0043231 intracellular membrane-bounded organelle; GO:0043229 intracellular organelle; GO:0005634 nucleus; GO:0044464 cell part; GO:0005622 intracellular; GO:0005737 cytoplasm; GO:0032991 macromolecular complex; GO:0044424 intracellular part; GO:0005829 cytosol; GO:0043234 protein complex; GO:0043227 membrane-bounded organelle; GO:0005623 cell; GO:0005739 mitochondrion; GO…	GO:0043274 phospholipase binding; GO:0016773 phosphotransferase activity, alcohol group as acceptor; GO:1990782 protein tyrosine kinase binding; GO:0005102 receptor binding; GO:0016791 phosphatase activity; GO:0019901 protein kinase binding; GO:0005515 protein binding; GO:0016787 hydrolase activity; GO:0004721 phosphoprotein phosphatase activity; GO:0051427 hormone receptor binding; GO:0050780 do…	K07293	PTPN11; tyrosine-protein phosphatase non-receptor type 11 [EC:3.1.3.48]	hsa04014 Ras signaling pathway; hsa04072 Phospholipase D signaling pathway; hsa04360 Axon guidance; hsa04625 C-type lectin receptor signaling pathway; hsa04630 JAK-STAT signaling pathway; hsa04650 Natural killer cell mediated cytotoxicity; hsa04670 Leukocyte transendothelial migration; hsa04722 Neurotrophin signaling pathway; hsa04920 Adipocytokine signaling pathway; hsa04931 Insulin resistance; …	IPR029021; IPR000387; IPR000980; IPR003595; IPR000242;	Protein-tyrosine phosphatase-like; Tyrosine specific protein phosphatases domain; SH2 domain; Protein-tyrosine phosphatase, catalytic; PTP type protein phosphatase;
Q9BZE4	332	0.15	Down	9.7261e-08	K	Nucleolar GTP-binding protein 1 OS=Homo sapiens OX=9606 GN=GTPBP4 PE=1 SV=3	GTPBP4	1	0.00532492	96.171	VK(1)TEACDR	2	2.2313	1	2.029	2.082	2.009	0.302	0.319	0.295	cytoplasm	GO:0044085 cellular component biogenesis; GO:0001649 osteoblast differentiation; GO:0065008 regulation of biological quality; GO:0022613 ribonucleoprotein complex biogenesis; GO:0048869 cellular developmental process; GO:0044699 single-organism process; GO:0033341 regulation of collagen binding; GO:0032091 negative regulation of protein binding; GO:0044237 cellular metabolic process; GO:0042273 r…	GO:0016020 membrane; GO:0031090 organelle membrane; GO:0005737 cytoplasm; GO:0044424 intracellular part; GO:0005623 cell; GO:0044422 organelle part; GO:0043228 non-membrane-bounded organelle; GO:0031974 membrane-enclosed lumen; GO:0031965 nuclear membrane; GO:0070013 intracellular organelle lumen; GO:0005622 intracellular; GO:0044464 cell part; GO:0048471 perinuclear region of cytoplasm; GO:00432…	GO:0003723 RNA binding; GO:1901265 nucleoside phosphate binding; GO:0001882 nucleoside binding; GO:0043167 ion binding; GO:0016817 hydrolase activity, acting on acid anhydrides; GO:0016787 hydrolase activity; GO:0005515 protein binding; GO:0000166 nucleotide binding; GO:0017111 nucleoside-triphosphatase activity; GO:1901363 heterocyclic compound binding; GO:0097159 organic cyclic compound binding…	K06943	NOG1; nucleolar GTP-binding protein	hsa03008 Ribosome biogenesis in eukaryotes	IPR005225; IPR006073; IPR031167; IPR027417; IPR010674; IPR012973;	Small GTP-binding protein domain; GTP binding domain; OBG-type guanine nucleotide-binding (G) domain; P-loop containing nucleoside triphosphate hydrolase; Nucleolar GTP-binding protein 1, Rossman-fold domain; NOG, C-terminal;
Q4V328	230	1.993	Up	2.4653e-05	K	GRIP1-associated protein 1 OS=Homo sapiens OX=9606 GN=GRIPAP1 PE=1 SV=2	GRIPAP1	1	0.00135038	86.772	LQEELAK(1)LSEK	3	-0.18655	2	0.659	0.631	0.6	1.287	1.212	1.268	cytoplasm	GO:0050794 regulation of cellular process; GO:0016043 cellular component organization; GO:0010256 endomembrane system organization; GO:0065008 regulation of biological quality; GO:0035418 protein localization to synapse; GO:1903539 protein localization to postsynaptic membrane; GO:0044699 single-organism process; GO:0090002 establishment of protein localization to plasma membrane; GO:1905244 regu…	GO:0044421 extracellular region part; GO:0005615 extracellular space; GO:0031410 cytoplasmic vesicle; GO:0005737 cytoplasm; GO:0031982 vesicle; GO:0044424 intracellular part; GO:0005623 cell; GO:0044422 organelle part; GO:0005769 early endosome; GO:0055037 recycling endosome; GO:0031974 membrane-enclosed lumen; GO:0005654 nucleoplasm; GO:0070013 intracellular organelle lumen; GO:0005622 intracell…	GO:0005515 protein binding; GO:0005488 binding;
Q8TD57	2921	0.476	Down	7.733e-05	K	Dynein heavy chain 3, axonemal OS=Homo sapiens OX=9606 GN=DNAH3 PE=2 SV=1	DNAH3	1	0.0106296	49.189	LAAQMQK(1)LNQK	2	-1.4123	1	1.444	1.498	1.439	0.637	0.719	0.728	plasma membrane	GO:0007018 microtubule-based movement; GO:0051674 localization of cell; GO:0001539 cilium or flagellum-dependent cell motility; GO:0044763 single-organism cellular process; GO:0060285 cilium-dependent cell motility; GO:0044699 single-organism process; GO:0006928 movement of cell or subcellular component; GO:0048870 cell motility; GO:0040011 locomotion; GO:0051179 localization; GO:0007017 microtub…	GO:0043229 intracellular organelle; GO:0005929 cilium; GO:0099513 polymeric cytoskeletal fiber; GO:0042995 cell projection; GO:0005874 microtubule; GO:0043232 intracellular non-membrane-bounded organelle; GO:0044430 cytoskeletal part; GO:0097014 ciliary plasm; GO:0005737 cytoplasm; GO:0044446 intracellular organelle part; GO:0005858 axonemal dynein complex; GO:0032991 macromolecular complex; GO:0…	GO:0005524 ATP binding; GO:0003774 motor activity; GO:1901265 nucleoside phosphate binding; GO:0001882 nucleoside binding; GO:0043167 ion binding; GO:0016817 hydrolase activity, acting on acid anhydrides; GO:0016787 hydrolase activity; GO:0000166 nucleotide binding; GO:0017111 nucleoside-triphosphatase activity; GO:0097159 organic cyclic compound binding; GO:1901363 heterocyclic compound binding;…	K10408	DNAH; dynein heavy chain, axonemal	hsa05016 Huntington disease	IPR024317; IPR004273; IPR003593; IPR013602; IPR024743; IPR027417;	Dynein heavy chain, P-loop containing D4 domain; Dynein heavy chain domain; AAA+ ATPase domain; Dynein heavy chain, domain-2; Dynein heavy chain, coiled coil stalk; P-loop containing nucleoside triphosphate hydrolase;
O75874	66	0.522	Down	5.5091e-05	K	Isocitrate dehydrogenase [NADP] cytoplasmic OS=Homo sapiens OX=9606 GN=IDH1 PE=1 SV=2	IDH1	1	0.0112286	97.798	K(1)HNVGVK	2	0.40383	1	1.436	1.413	1.369	0.765	0.688	0.748	cytoplasm	GO:0019362 pyridine nucleotide metabolic process; GO:0045321 leukocyte activation; GO:0006518 peptide metabolic process; GO:0022414 reproductive process; GO:0019216 regulation of lipid metabolic process; GO:0044237 cellular metabolic process; GO:0008152 metabolic process; GO:0006091 generation of precursor metabolites and energy; GO:0044262 cellular carbohydrate metabolic process; GO:0044702 sing…	GO:0034774 secretory granule lumen; GO:1904724 tertiary granule lumen; GO:0044421 extracellular region part; GO:0031410 cytoplasmic vesicle; GO:0005737 cytoplasm; GO:0031982 vesicle; GO:0044433 cytoplasmic vesicle part; GO:0044438 microbody part; GO:0044424 intracellular part; GO:0005623 cell; GO:1904813 ficolin-1-rich granule lumen; GO:0044422 organelle part; GO:0070062 extracellular exosome; GO…	GO:0000287 magnesium ion binding; GO:1901265 nucleoside phosphate binding; GO:0005102 receptor binding; GO:0046983 protein dimerization activity; GO:0043167 ion binding; GO:0004448 isocitrate dehydrogenase activity; GO:0005515 protein binding; GO:0000166 nucleotide binding; GO:0048037 cofactor binding; GO:0016491 oxidoreductase activity; GO:0097159 organic cyclic compound binding; GO:1901363 hete…	K00031	IDH1, IDH2, icd; isocitrate dehydrogenase [EC:1.1.1.42]	hsa00020 Citrate cycle (TCA cycle); hsa00480 Glutathione metabolism; hsa01100 Metabolic pathways; hsa01200 Carbon metabolism; hsa01210 2-Oxocarboxylic acid metabolism; hsa01230 Biosynthesis of amino acids; hsa04146 Peroxisome	IPR024084;	Isopropylmalate dehydrogenase-like domain;
P43034	360	0.433	Down	0.0023609	K	Platelet-activating factor acetylhydrolase IB subunit alpha OS=Homo sapiens OX=9606 GN=PAFAH1B1 PE=1 SV=2	PAFAH1B1	1	0.00320332	72.705	FILSCADDK(1)TLR	2	0.75147	1	1.351	1.606	1.584	0.52	0.74	0.704	cytoplasm,nucleus	GO:0044700 single organism signaling; GO:0044085 cellular component biogenesis; GO:0032872 regulation of stress-activated MAPK cascade; GO:0021766 hippocampus development; GO:0022414 reproductive process; GO:0044255 cellular lipid metabolic process; GO:0044237 cellular metabolic process; GO:0044782 cilium organization; GO:0045927 positive regulation of growth; GO:0007097 nuclear migration; GO:003…	GO:0016020 membrane; GO:0098862 cluster of actin-based cell projections; GO:0044421 extracellular region part; GO:0031090 organelle membrane; GO:0099568 cytoplasmic region; GO:0005737 cytoplasm; GO:0032838 cell projection cytoplasm; GO:0043025 neuronal cell body; GO:0032991 macromolecular complex; GO:0099080 supramolecular complex; GO:0098858 actin-based cell projection; GO:0005623 cell; GO:00444…	GO:0070840 dynein complex binding; GO:0034452 dynactin binding; GO:0052689 carboxylic ester hydrolase activity; GO:0043274 phospholipase binding; GO:0044877 macromolecular complex binding; GO:0046983 protein dimerization activity; GO:0043167 ion binding; GO:0015631 tubulin binding; GO:0016787 hydrolase activity; GO:0005515 protein binding; GO:0016298 lipase activity; GO:0008201 heparin binding; G…	K16794	PAFAH1B1, LIS1; platelet-activating factor acetylhydrolase IB subunit alpha	hsa00565 Ether lipid metabolism; hsa01100 Metabolic pathways	IPR017986; IPR015943; IPR006594;	WD40-repeat-containing domain; WD40/YVTN repeat-like-containing domain; LIS1 homology motif;
Q9UQ35	2602	2.195	Up	9.6664e-05	K	Serine/arginine repetitive matrix protein 2 OS=Homo sapiens OX=9606 GN=SRRM2 PE=1 SV=2	SRRM2	1	0.00254731	63.181	EGRPPEPTPAK(1)R	3	-0.1196	1	0.56	0.596	0.6	1.258	1.396	1.201	nucleus	GO:0006396 RNA processing; GO:0006725 cellular aromatic compound metabolic process; GO:1901360 organic cyclic compound metabolic process; GO:0006807 nitrogen compound metabolic process; GO:0044238 primary metabolic process; GO:0044237 cellular metabolic process; GO:0071704 organic substance metabolic process; GO:0006397 mRNA processing; GO:0016070 RNA metabolic process; GO:0000398 mRNA splicing, …	GO:0043229 intracellular organelle; GO:0044446 intracellular organelle part; GO:0032991 macromolecular complex; GO:0031981 nuclear lumen; GO:0044424 intracellular part; GO:0005681 spliceosomal complex; GO:0016604 nuclear body; GO:0005623 cell; GO:0015030 Cajal body; GO:0044422 organelle part; GO:0043226 organelle; GO:0043231 intracellular membrane-bounded organelle; GO:0031974 membrane-enclosed l…	GO:0097159 organic cyclic compound binding; GO:1901363 heterocyclic compound binding; GO:0003723 RNA binding; GO:0047485 protein N-terminus binding; GO:0005488 binding; GO:0003676 nucleic acid binding; GO:0070742 C2H2 zinc finger domain binding; GO:0005515 protein binding; GO:0019904 protein domain specific binding;	K13172	SRRM2, SRM300; serine/arginine repetitive matrix protein 2		IPR024945; IPR013170;	Spt5 C-terminal domain; mRNA splicing factor Cwf21 domain;
Q16531	191	1.804	Up	3.8213e-05	K	DNA damage-binding protein 1 OS=Homo sapiens OX=9606 GN=DDB1 PE=1 SV=1	DDB1	1	5.7889e-05	94.363	HVK(1)TYEVSLR	3	-1.2231	2	0.644	0.677	0.712	1.233	1.223	1.211	cytoplasm	GO:0044085 cellular component biogenesis; GO:0044700 single organism signaling; GO:0065008 regulation of biological quality; GO:0010941 regulation of cell death; GO:0007166 cell surface receptor signaling pathway; GO:0006296 nucleotide-excision repair, DNA incision, 5'-to lesion; GO:0006289 nucleotide-excision repair; GO:0034644 cellular response to UV; GO:0010564 regulation of cell cycle process…	GO:0080008 Cul4-RING E3 ubiquitin ligase complex; GO:0000784 nuclear chromosome, telomeric region; GO:0000781 chromosome, telomeric region; GO:0005615 extracellular space; GO:0044421 extracellular region part; GO:0031982 vesicle; GO:0005737 cytoplasm; GO:0032991 macromolecular complex; GO:0044424 intracellular part; GO:0005623 cell; GO:0044422 organelle part; GO:0044427 chromosomal part; GO:00432…	GO:0097159 organic cyclic compound binding; GO:1901363 heterocyclic compound binding; GO:0003677 DNA binding; GO:0003684 damaged DNA binding; GO:0005515 protein binding; GO:0005488 binding; GO:0003676 nucleic acid binding;	K10610	DDB1; DNA damage-binding protein 1	hsa03420 Nucleotide excision repair; hsa04120 Ubiquitin mediated proteolysis; hsa05161 Hepatitis B; hsa05170 Human immunodeficiency virus 1 infection; hsa05203 Viral carcinogenesis	IPR017986; IPR015943; IPR004871;	WD40-repeat-containing domain; WD40/YVTN repeat-like-containing domain; Cleavage/polyadenylation specificity factor, A subunit, C-terminal;
P50897	165	0.565	Down	1.84014e-05	K	Palmitoyl-protein thioesterase 1 OS=Homo sapiens OX=9606 GN=PPT1 PE=1 SV=1	PPT1	1	0.00182747	85.536	K(1)TLNAGAYSK	2	-0.12283	1	1.372	1.389	1.309	0.749	0.788	0.762	extracellular	GO:0060627 regulation of vesicle-mediated transport; GO:0044700 single organism signaling; GO:0010941 regulation of cell death; GO:0065008 regulation of biological quality; GO:0007601 visual perception; GO:0007420 brain development; GO:0035337 fatty-acyl-CoA metabolic process; GO:0043523 regulation of neuron apoptotic process; GO:0098734 macromolecule depalmitoylation; GO:0030641 regulation of ce…	GO:0016020 membrane; GO:0030425 dendrite; GO:0005615 extracellular space; GO:0044421 extracellular region part; GO:0031410 cytoplasmic vesicle; GO:0098857 membrane microdomain; GO:0005737 cytoplasm; GO:0031982 vesicle; GO:0043025 neuronal cell body; GO:0044424 intracellular part; GO:0005623 cell; GO:0044422 organelle part; GO:0005775 vacuolar lumen; GO:0031974 membrane-enclosed lumen; GO:0070382 …	GO:0098599 palmitoyl hydrolase activity; GO:0003824 catalytic activity; GO:0005488 binding; GO:0016788 hydrolase activity, acting on ester bonds; GO:0047617 acyl-CoA hydrolase activity; GO:0016289 CoA hydrolase activity; GO:0016787 hydrolase activity; GO:0005515 protein binding; GO:0016790 thiolester hydrolase activity; GO:0008474 palmitoyl-(protein) hydrolase activity; GO:0016290 palmitoyl-CoA h…	K01074	PPT; palmitoyl-protein thioesterase [EC:3.1.2.22]	hsa00062 Fatty acid elongation; hsa01100 Metabolic pathways; hsa01212 Fatty acid metabolism; hsa04142 Lysosome	IPR029058;	Alpha/Beta hydrolase fold;
P11172	314	3.176	Up	6.5206e-07	K	Uridine 5'-monophosphate synthase OS=Homo sapiens OX=9606 GN=UMPS PE=1 SV=1	UMPS	1	0.000819799	82.489	K(1)FADIGNTVK	3	1.6372	2	0.43	0.446	0.433	1.439	1.332	1.387	mitochondria	GO:0046132 pyrimidine ribonucleoside biosynthetic process; GO:0009116 nucleoside metabolic process; GO:0065008 regulation of biological quality; GO:0048732 gland development; GO:0022414 reproductive process; GO:0009130 pyrimidine nucleoside monophosphate biosynthetic process; GO:0009117 nucleotide metabolic process; GO:0044699 single-organism process; GO:0009058 biosynthetic process; GO:0009163 n…	GO:0043226 organelle; GO:0043231 intracellular membrane-bounded organelle; GO:0043229 intracellular organelle; GO:0005634 nucleus; GO:0044464 cell part; GO:0005622 intracellular; GO:0005737 cytoplasm; GO:0044424 intracellular part; GO:0043227 membrane-bounded organelle; GO:0005623 cell; GO:0005829 cytosol; GO:0044444 cytoplasmic part;	GO:0016763 transferase activity, transferring pentosyl groups; GO:0004590 orotidine-5'-phosphate decarboxylase activity; GO:0003824 catalytic activity; GO:0016830 carbon-carbon lyase activity; GO:0016831 carboxy-lyase activity; GO:0016829 lyase activity; GO:0016757 transferase activity, transferring glycosyl groups; GO:0016740 transferase activity; GO:0004588 orotate phosphoribosyltransferase act…	K13421	UMPS; uridine monophosphate synthetase [EC:2.4.2.10 4.1.1.23]	hsa00240 Pyrimidine metabolism; hsa00983 Drug metabolism - other enzymes; hsa01100 Metabolic pathways	IPR013785; IPR000836; IPR004467; IPR011060; IPR001754; IPR029057;	Aldolase-type TIM barrel; Phosphoribosyltransferase domain; Orotate phosphoribosyl transferase domain; Ribulose-phosphate binding barrel; Orotidine 5'-phosphate decarboxylase domain; Phosphoribosyltransferase-like;
Q14376	176	0.596	Down	0.0041432	K	UDP-glucose 4-epimerase OS=Homo sapiens OX=9606 GN=GALE PE=1 SV=2	GALE	1	0.000222453	80.387	DLCQADK(1)TWNAVLLR	3	-0.17253	1	1.218	1.39	1.353	0.696	0.909	0.757	cytoplasm	GO:0046365 monosaccharide catabolic process; GO:0044724 single-organism carbohydrate catabolic process; GO:0044712 single-organism catabolic process; GO:0044281 small molecule metabolic process; GO:0044699 single-organism process; GO:0044282 small molecule catabolic process; GO:0005975 carbohydrate metabolic process; GO:0044238 primary metabolic process; GO:0071704 organic substance metabolic pro…	GO:0070062 extracellular exosome; GO:0043226 organelle; GO:0044421 extracellular region part; GO:0044464 cell part; GO:0005622 intracellular; GO:0005737 cytoplasm; GO:0031982 vesicle; GO:1903561 extracellular vesicle; GO:0044424 intracellular part; GO:0005623 cell; GO:0005829 cytosol; GO:0043227 membrane-bounded organelle; GO:0005576 extracellular region; GO:0043230 extracellular organelle; GO:00…	GO:0016853 isomerase activity; GO:0042802 identical protein binding; GO:0003974 UDP-N-acetylglucosamine 4-epimerase activity; GO:0016854 racemase and epimerase activity; GO:0016857 racemase and epimerase activity, acting on carbohydrates and derivatives; GO:0003824 catalytic activity; GO:0042803 protein homodimerization activity; GO:0005488 binding; GO:0046983 protein dimerization activity; GO:00…	K01784	galE, GALE; UDP-glucose 4-epimerase [EC:5.1.3.2]	hsa00052 Galactose metabolism; hsa00520 Amino sugar and nucleotide sugar metabolism; hsa01100 Metabolic pathways	IPR016040;	NAD(P)-binding domain;
P08559	83	0.501	Down	1.87116e-05	K	Pyruvate dehydrogenase E1 component subunit alpha, somatic form, mitochondrial OS=Homo sapiens OX=9606 GN=PDHA1 PE=1 SV=3	PDHA1	1	0.0168939	57.59	ADQLYK(1)QK	3	0.32031	1	1.467	1.39	1.435	0.751	0.695	0.704	mitochondria	GO:0051188 cofactor biosynthetic process; GO:0019362 pyridine nucleotide metabolic process; GO:0010510 regulation of acetyl-CoA biosynthetic process from pyruvate; GO:0009117 nucleotide metabolic process; GO:0044699 single-organism process; GO:0009058 biosynthetic process; GO:0019216 regulation of lipid metabolic process; GO:0072524 pyridine-containing compound metabolic process; GO:0044237 cellu…	GO:0005759 mitochondrial matrix; GO:0043229 intracellular organelle; GO:0044429 mitochondrial part; GO:0043232 intracellular non-membrane-bounded organelle; GO:0005737 cytoplasm; GO:0044446 intracellular organelle part; GO:0031981 nuclear lumen; GO:0032991 macromolecular complex; GO:0044424 intracellular part; GO:0005730 nucleolus; GO:0045254 pyruvate dehydrogenase complex; GO:0005623 cell; GO:00…	GO:0016620 oxidoreductase activity, acting on the aldehyde or oxo group of donors, NAD or NADP as acceptor; GO:0034603 pyruvate dehydrogenase [NAD(P)+] activity; GO:0034604 pyruvate dehydrogenase (NAD+) activity; GO:0003824 catalytic activity; GO:0016903 oxidoreductase activity, acting on the aldehyde or oxo group of donors; GO:0004738 pyruvate dehydrogenase activity; GO:0004739 pyruvate dehydrog…	K00161	PDHA, pdhA; pyruvate dehydrogenase E1 component alpha subunit [EC:1.2.4.1]	hsa00010 Glycolysis / Gluconeogenesis; hsa00020 Citrate cycle (TCA cycle); hsa00620 Pyruvate metabolism; hsa01100 Metabolic pathways; hsa01200 Carbon metabolism; hsa04066 HIF-1 signaling pathway; hsa04922 Glucagon signaling pathway; hsa05230 Central carbon metabolism in cancer	IPR001017; IPR029061;	Dehydrogenase, E1 component; Thiamin diphosphate-binding fold;
P08559	321	0.477	Down	3.5027e-05	K	Pyruvate dehydrogenase E1 component subunit alpha, somatic form, mitochondrial OS=Homo sapiens OX=9606 GN=PDHA1 PE=1 SV=3	PDHA1	1	0.000127501	116.74	SDPIMLLK(1)DR	3	-0.61511	3	1.475	1.483	1.42	0.691	0.66	0.738	mitochondria	GO:0051188 cofactor biosynthetic process; GO:0019362 pyridine nucleotide metabolic process; GO:0010510 regulation of acetyl-CoA biosynthetic process from pyruvate; GO:0009117 nucleotide metabolic process; GO:0044699 single-organism process; GO:0009058 biosynthetic process; GO:0019216 regulation of lipid metabolic process; GO:0072524 pyridine-containing compound metabolic process; GO:0044237 cellu…	GO:0005759 mitochondrial matrix; GO:0043229 intracellular organelle; GO:0044429 mitochondrial part; GO:0043232 intracellular non-membrane-bounded organelle; GO:0005737 cytoplasm; GO:0044446 intracellular organelle part; GO:0031981 nuclear lumen; GO:0032991 macromolecular complex; GO:0044424 intracellular part; GO:0005730 nucleolus; GO:0045254 pyruvate dehydrogenase complex; GO:0005623 cell; GO:00…	GO:0016620 oxidoreductase activity, acting on the aldehyde or oxo group of donors, NAD or NADP as acceptor; GO:0034603 pyruvate dehydrogenase [NAD(P)+] activity; GO:0034604 pyruvate dehydrogenase (NAD+) activity; GO:0003824 catalytic activity; GO:0016903 oxidoreductase activity, acting on the aldehyde or oxo group of donors; GO:0004738 pyruvate dehydrogenase activity; GO:0004739 pyruvate dehydrog…	K00161	PDHA, pdhA; pyruvate dehydrogenase E1 component alpha subunit [EC:1.2.4.1]	hsa00010 Glycolysis / Gluconeogenesis; hsa00020 Citrate cycle (TCA cycle); hsa00620 Pyruvate metabolism; hsa01100 Metabolic pathways; hsa01200 Carbon metabolism; hsa04066 HIF-1 signaling pathway; hsa04922 Glucagon signaling pathway; hsa05230 Central carbon metabolism in cancer	IPR001017; IPR029061;	Dehydrogenase, E1 component; Thiamin diphosphate-binding fold;
P08559	313	0.443	Down	2.0296e-05	K	Pyruvate dehydrogenase E1 component subunit alpha, somatic form, mitochondrial OS=Homo sapiens OX=9606 GN=PDHA1 PE=1 SV=3	PDHA1	1	0.000353207	107.09	SK(1)SDPIMLLK	2	-0.43555	2	1.553	1.469	1.495	0.707	0.659	0.636	mitochondria	GO:0051188 cofactor biosynthetic process; GO:0019362 pyridine nucleotide metabolic process; GO:0010510 regulation of acetyl-CoA biosynthetic process from pyruvate; GO:0009117 nucleotide metabolic process; GO:0044699 single-organism process; GO:0009058 biosynthetic process; GO:0019216 regulation of lipid metabolic process; GO:0072524 pyridine-containing compound metabolic process; GO:0044237 cellu…	GO:0005759 mitochondrial matrix; GO:0043229 intracellular organelle; GO:0044429 mitochondrial part; GO:0043232 intracellular non-membrane-bounded organelle; GO:0005737 cytoplasm; GO:0044446 intracellular organelle part; GO:0031981 nuclear lumen; GO:0032991 macromolecular complex; GO:0044424 intracellular part; GO:0005730 nucleolus; GO:0045254 pyruvate dehydrogenase complex; GO:0005623 cell; GO:00…	GO:0016620 oxidoreductase activity, acting on the aldehyde or oxo group of donors, NAD or NADP as acceptor; GO:0034603 pyruvate dehydrogenase [NAD(P)+] activity; GO:0034604 pyruvate dehydrogenase (NAD+) activity; GO:0003824 catalytic activity; GO:0016903 oxidoreductase activity, acting on the aldehyde or oxo group of donors; GO:0004738 pyruvate dehydrogenase activity; GO:0004739 pyruvate dehydrog…	K00161	PDHA, pdhA; pyruvate dehydrogenase E1 component alpha subunit [EC:1.2.4.1]	hsa00010 Glycolysis / Gluconeogenesis; hsa00020 Citrate cycle (TCA cycle); hsa00620 Pyruvate metabolism; hsa01100 Metabolic pathways; hsa01200 Carbon metabolism; hsa04066 HIF-1 signaling pathway; hsa04922 Glucagon signaling pathway; hsa05230 Central carbon metabolism in cancer	IPR001017; IPR029061;	Dehydrogenase, E1 component; Thiamin diphosphate-binding fold;
O00273	45	0.601	Down	0.00179555	K	DNA fragmentation factor subunit alpha OS=Homo sapiens OX=9606 GN=DFFA PE=1 SV=1	DFFA	1	0.000391933	92.939	SK(1)ACDILAIDK	2	-0.32823	1	1.34	1.395	1.215	0.712	0.862	0.8	nucleus	GO:0010941 regulation of cell death; GO:0006308 DNA catabolic process; GO:0051129 negative regulation of cellular component organization; GO:0044699 single-organism process; GO:0044237 cellular metabolic process; GO:0008152 metabolic process; GO:0030262 apoptotic nuclear changes; GO:0006915 apoptotic process; GO:1901361 organic cyclic compound catabolic process; GO:1902511 negative regulation of …	GO:0016020 membrane; GO:0043229 intracellular organelle; GO:0043232 intracellular non-membrane-bounded organelle; GO:0071944 cell periphery; GO:0005737 cytoplasm; GO:0044446 intracellular organelle part; GO:0031981 nuclear lumen; GO:0044424 intracellular part; GO:0005829 cytosol; GO:0005623 cell; GO:0044422 organelle part; GO:0005886 plasma membrane; GO:0044427 chromosomal part; GO:0043228 non-me…	GO:0005515 protein binding; GO:0005488 binding;	K02310	DFFA, DFF45; DNA fragmentation factor, 45 kD, alpha subunit	hsa04210 Apoptosis	IPR027296; IPR015121; IPR003508;	DNA fragmentation factor 45kDa C-terminal domain; DNA fragmentation factor 45kDa, middle domain; CIDE-N domain;
O75367	304	0.372	Down	4.0974e-05	K	Core histone macro-H2A.1 OS=Homo sapiens OX=9606 GN=H2AFY PE=1 SV=4	H2AFY	1	0.000144859	116.24	NCLALADDK(1)K	2	0.39339	2	1.634	1.692	1.494	0.556	0.613	0.622	mitochondria	GO:0044085 cellular component biogenesis; GO:0034093 positive regulation of maintenance of sister chromatid cohesion; GO:0030858 positive regulation of epithelial cell differentiation; GO:0019216 regulation of lipid metabolic process; GO:0010564 regulation of cell cycle process; GO:0033127 regulation of histone phosphorylation; GO:0071900 regulation of protein serine/threonine kinase activity; GO…	GO:0001740 Barr body; GO:0044421 extracellular region part; GO:0000784 nuclear chromosome, telomeric region; GO:0000781 chromosome, telomeric region; GO:0031982 vesicle; GO:0000803 sex chromosome; GO:0032991 macromolecular complex; GO:0044424 intracellular part; GO:0005623 cell; GO:0000792 heterochromatin; GO:0044422 organelle part; GO:0044427 chromosomal part; GO:0043228 non-membrane-bounded org…	GO:0030291 protein serine/threonine kinase inhibitor activity; GO:0000182 rDNA binding; GO:0031490 chromatin DNA binding; GO:0003690 double-stranded DNA binding; GO:0046983 protein dimerization activity; GO:0019901 protein kinase binding; GO:0005515 protein binding; GO:0004860 protein kinase inhibitor activity; GO:0003682 chromatin binding; GO:0019207 kinase regulator activity; GO:0004857 enzyme …	K11251	H2A; histone H2A	hsa04217 Necroptosis; hsa05034 Alcoholism; hsa05322 Systemic lupus erythematosus	IPR002589; IPR032454; IPR009072; IPR007125;	Macro domain; Histone H2A, C-terminal domain; Histone-fold; Histone H2A/H2B/H3;
O75367	295	0.546	Down	2.6924e-06	K	Core histone macro-H2A.1 OS=Homo sapiens OX=9606 GN=H2AFY PE=1 SV=4	H2AFY	1	5.52362e-05	96.773	TVK(1)NCLALADDKK	3	-0.98776	1	1.421	1.369	1.343	0.754	0.74	0.762	mitochondria	GO:0044085 cellular component biogenesis; GO:0034093 positive regulation of maintenance of sister chromatid cohesion; GO:0030858 positive regulation of epithelial cell differentiation; GO:0019216 regulation of lipid metabolic process; GO:0010564 regulation of cell cycle process; GO:0033127 regulation of histone phosphorylation; GO:0071900 regulation of protein serine/threonine kinase activity; GO…	GO:0001740 Barr body; GO:0044421 extracellular region part; GO:0000784 nuclear chromosome, telomeric region; GO:0000781 chromosome, telomeric region; GO:0031982 vesicle; GO:0000803 sex chromosome; GO:0032991 macromolecular complex; GO:0044424 intracellular part; GO:0005623 cell; GO:0000792 heterochromatin; GO:0044422 organelle part; GO:0044427 chromosomal part; GO:0043228 non-membrane-bounded org…	GO:0030291 protein serine/threonine kinase inhibitor activity; GO:0000182 rDNA binding; GO:0031490 chromatin DNA binding; GO:0003690 double-stranded DNA binding; GO:0046983 protein dimerization activity; GO:0019901 protein kinase binding; GO:0005515 protein binding; GO:0004860 protein kinase inhibitor activity; GO:0003682 chromatin binding; GO:0019207 kinase regulator activity; GO:0004857 enzyme …	K11251	H2A; histone H2A	hsa04217 Necroptosis; hsa05034 Alcoholism; hsa05322 Systemic lupus erythematosus	IPR002589; IPR032454; IPR009072; IPR007125;	Macro domain; Histone H2A, C-terminal domain; Histone-fold; Histone H2A/H2B/H3;
P37802	40	0.352	Down	3.499e-07	K	Transgelin-2 OS=Homo sapiens OX=9606 GN=TAGLN2 PE=1 SV=3	TAGLN2	1	0.000103609	115.91	K(1)DVGRPQPGR	3	0.41102	3	1.643	1.658	1.609	0.563	0.571	0.596	cytoplasm,nucleus	GO:0032502 developmental process; GO:0060429 epithelium development; GO:0009888 tissue development; GO:0048869 cellular developmental process; GO:0016192 vesicle-mediated transport; GO:0044763 single-organism cellular process; GO:0044699 single-organism process; GO:0002576 platelet degranulation; GO:0051234 establishment of localization; GO:0006810 transport; GO:0030154 cell differentiation; GO:0…	GO:0070062 extracellular exosome; GO:0043226 organelle; GO:0044421 extracellular region part; GO:0044464 cell part; GO:0005622 intracellular; GO:0005737 cytoplasm; GO:0031982 vesicle; GO:1903561 extracellular vesicle; GO:0044424 intracellular part; GO:0005623 cell; GO:0005829 cytosol; GO:0043227 membrane-bounded organelle; GO:0005576 extracellular region; GO:0043230 extracellular organelle; GO:00…	GO:0050839 cell adhesion molecule binding; GO:0005515 protein binding; GO:0005488 binding; GO:0045296 cadherin binding;	K20526	TAGLN; transgelin		IPR001715;	Calponin homology domain;
O75369	2530	0.633	Down	0.0030407	K	Filamin-B OS=Homo sapiens OX=9606 GN=FLNB PE=1 SV=2	FLNB	1	3.33764e-08	107.35	AFVGQK(1)SSFLVDCSK	3	-1.854	1	1.148	1.351	1.348	0.758	0.791	0.886	cytoplasm,nucleus	GO:0044700 single organism signaling; GO:0065008 regulation of biological quality; GO:0048869 cellular developmental process; GO:0032989 cellular component morphogenesis; GO:0044699 single-organism process; GO:0009913 epidermal cell differentiation; GO:0007165 signal transduction; GO:0030036 actin cytoskeleton organization; GO:0007154 cell communication; GO:0008544 epidermis development; GO:00516…	GO:0016020 membrane; GO:0044421 extracellular region part; GO:0098862 cluster of actin-based cell projections; GO:0005903 brush border; GO:0005938 cell cortex; GO:0030054 cell junction; GO:0071944 cell periphery; GO:0030016 myofibril; GO:0031982 vesicle; GO:0005737 cytoplasm; GO:0099568 cytoplasmic region; GO:0031224 intrinsic component of membrane; GO:0099512 supramolecular fiber; GO:0044424 int…	GO:0097159 organic cyclic compound binding; GO:1901363 heterocyclic compound binding; GO:0050839 cell adhesion molecule binding; GO:0003723 RNA binding; GO:0008092 cytoskeletal protein binding; GO:0042802 identical protein binding; GO:0005488 binding; GO:0045296 cadherin binding; GO:0003676 nucleic acid binding; GO:0003779 actin binding; GO:0005515 protein binding;	K04437	FLNA; filamin	hsa04010 MAPK signaling pathway; hsa04510 Focal adhesion; hsa05132 Salmonella infection; hsa05205 Proteoglycans in cancer	IPR013783; IPR014756; IPR001715;	Immunoglobulin-like fold; Immunoglobulin E-set; Calponin homology domain;
Q9HAU5	655	2.502	Up	0.00068041	K	Regulator of nonsense transcripts 2 OS=Homo sapiens OX=9606 GN=UPF2 PE=1 SV=1	UPF2	1	0.0107852	75.819	K(1)DQINIETK	2	0.6534	1	0.517	0.515	0.554	1.314	1.325	1.329	cytoplasm,nucleus	GO:0050658 RNA transport; GO:0031100 animal organ regeneration; GO:0048732 gland development; GO:0044699 single-organism process; GO:0051169 nuclear transport; GO:0051168 nuclear export; GO:0044237 cellular metabolic process; GO:0015031 protein transport; GO:0051234 establishment of localization; GO:0008152 metabolic process; GO:0071427 mRNA-containing ribonucleoprotein complex export from nucleu…	GO:0043229 intracellular organelle; GO:0043232 intracellular non-membrane-bounded organelle; GO:0044446 intracellular organelle part; GO:0000932 P-body; GO:0005737 cytoplasm; GO:0032991 macromolecular complex; GO:0044424 intracellular part; GO:0005829 cytosol; GO:0005623 cell; GO:0044422 organelle part; GO:0036464 cytoplasmic ribonucleoprotein granule; GO:0043228 non-membrane-bounded organelle; G…	GO:0097159 organic cyclic compound binding; GO:1901363 heterocyclic compound binding; GO:0003677 DNA binding; GO:0003723 RNA binding; GO:0005488 binding; GO:0003676 nucleic acid binding; GO:0042162 telomeric DNA binding; GO:0005515 protein binding; GO:0043565 sequence-specific DNA binding;	K14327	UPF2, RENT2; regulator of nonsense transcripts 2	hsa03013 RNA transport; hsa03015 mRNA surveillance pathway	IPR003890; IPR016024; IPR007193; IPR016021;	MIF4G-like, type 3; Armadillo-type fold; Up-frameshift suppressor 2; MIF4G-like domain;
Q8TCD5	112	0.502	Down	0.00010081	K	5'(3')-deoxyribonucleotidase, cytosolic type OS=Homo sapiens OX=9606 GN=NT5C PE=1 SV=2	NT5C	1	0.000397329	86.882	YHHCVGEK(1)YR	3	-1.1466	4	1.441	1.4	1.446	0.68	0.78	0.69	extracellular	GO:0046135 pyrimidine nucleoside catabolic process; GO:0009116 nucleoside metabolic process; GO:0006725 cellular aromatic compound metabolic process; GO:0046434 organophosphate catabolic process; GO:0009117 nucleotide metabolic process; GO:0044699 single-organism process; GO:0072523 purine-containing compound catabolic process; GO:0009262 deoxyribonucleotide metabolic process; GO:0009394 2'-deoxy…	GO:0043229 intracellular organelle; GO:0044421 extracellular region part; GO:0031982 vesicle; GO:0005737 cytoplasm; GO:0044424 intracellular part; GO:0005623 cell; GO:0005829 cytosol; GO:0005576 extracellular region; GO:0005739 mitochondrion; GO:0043231 intracellular membrane-bounded organelle; GO:0043226 organelle; GO:0070062 extracellular exosome; GO:0005634 nucleus; GO:0005622 intracellular; G…	GO:1901265 nucleoside phosphate binding; GO:0008252 nucleotidase activity; GO:0016791 phosphatase activity; GO:0043167 ion binding; GO:0016787 hydrolase activity; GO:0000166 nucleotide binding; GO:1901363 heterocyclic compound binding; GO:0097159 organic cyclic compound binding; GO:0008253 5'-nucleotidase activity; GO:0042578 phosphoric ester hydrolase activity; GO:0003824 catalytic activity; GO:…	K01081	E3.1.3.5; 5'-nucleotidase [EC:3.1.3.5]	hsa00230 Purine metabolism; hsa00240 Pyrimidine metabolism; hsa00760 Nicotinate and nicotinamide metabolism; hsa01100 Metabolic pathways	IPR023214;	HAD-like domain;
P62987	88	0.603	Down	2.4753e-05	K	Ubiquitin-60S ribosomal protein L40 OS=Homo sapiens OX=9606 GN=UBA52 PE=1 SV=2	UBA52	1	7.06338e-11	157.68	QLAQK(1)YNCDK	3	0.21313	3	1.377	1.277	1.297	0.802	0.784	0.795	extracellular	GO:0044700 single organism signaling; GO:0036508 protein alpha-1,2-demannosylation; GO:0010608 posttranscriptional regulation of gene expression; GO:1901185 negative regulation of ERBB signaling pathway; GO:0051443 positive regulation of ubiquitin-protein transferase activity; GO:0010564 regulation of cell cycle process; GO:0044237 cellular metabolic process; GO:0044264 cellular polysaccharide me…	GO:0016020 membrane; GO:0019867 outer membrane; GO:0044421 extracellular region part; GO:0031090 organelle membrane; GO:0005737 cytoplasm; GO:0044433 cytoplasmic vesicle part; GO:0032991 macromolecular complex; GO:0005623 cell; GO:0044422 organelle part; GO:0043228 non-membrane-bounded organelle; GO:0005765 lysosomal membrane; GO:0070062 extracellular exosome; GO:0005654 nucleoplasm; GO:0005622 i…	GO:0005515 protein binding; GO:0003735 structural constituent of ribosome; GO:0005198 structural molecule activity; GO:0005488 binding;	K02927	RP-L40e, RPL40; large subunit ribosomal protein L40e	hsa03010 Ribosome	IPR029071; IPR000626;	Ubiquitin-related domain; Ubiquitin domain;
P11021	553	1.584	Up	0.00051646	K	Endoplasmic reticulum chaperone BiP OS=Homo sapiens OX=9606 GN=HSPA5 PE=1 SV=2	HSPA5	1	0.0198462	68.915	FAEEDK(1)K	3	0.25072	1	0.739	0.758	0.737	1.273	1.094	1.171	endoplasmic reticulum	GO:0044700 single organism signaling; GO:0010941 regulation of cell death; GO:0009891 positive regulation of biosynthetic process; GO:0046683 response to organophosphorus; GO:0032091 negative regulation of protein binding; GO:1905897 regulation of response to endoplasmic reticulum stress; GO:0044237 cellular metabolic process; GO:0009607 response to biotic stimulus; GO:0021762 substantia nigra de…	GO:0005790 smooth endoplasmic reticulum; GO:0016020 membrane; GO:0005783 endoplasmic reticulum; GO:0042175 nuclear outer membrane-endoplasmic reticulum membrane network; GO:0044421 extracellular region part; GO:0031410 cytoplasmic vesicle; GO:0071944 cell periphery; GO:0030054 cell junction; GO:0031982 vesicle; GO:0005737 cytoplasm; GO:0032991 macromolecular complex; GO:0031224 intrinsic componen…	GO:1901265 nucleoside phosphate binding; GO:0031625 ubiquitin protein ligase binding; GO:0016817 hydrolase activity, acting on acid anhydrides; GO:0016787 hydrolase activity; GO:0005515 protein binding; GO:0016887 ATPase activity; GO:0097159 organic cyclic compound binding; GO:1901363 heterocyclic compound binding; GO:0016462 pyrophosphatase activity; GO:0003824 catalytic activity; GO:0032553 rib…	K09490	HSPA5, BIP; heat shock 70kDa protein 5	hsa03060 Protein export; hsa04141 Protein processing in endoplasmic reticulum; hsa04612 Antigen processing and presentation; hsa04918 Thyroid hormone synthesis; hsa05020 Prion diseases	IPR029048; IPR029047;	Heat shock protein 70kD, C-terminal domain; Heat shock protein 70kD, peptide-binding domain;
P11021	352	1.593	Up	7.6558e-05	K	Endoplasmic reticulum chaperone BiP OS=Homo sapiens OX=9606 GN=HSPA5 PE=1 SV=2	HSPA5	1	0.000769989	104.22	VLEDSDLK(1)K	3	2.7364	2	0.731	0.73	0.76	1.123	1.214	1.2	endoplasmic reticulum	GO:0044700 single organism signaling; GO:0010941 regulation of cell death; GO:0009891 positive regulation of biosynthetic process; GO:0046683 response to organophosphorus; GO:0032091 negative regulation of protein binding; GO:1905897 regulation of response to endoplasmic reticulum stress; GO:0044237 cellular metabolic process; GO:0009607 response to biotic stimulus; GO:0021762 substantia nigra de…	GO:0005790 smooth endoplasmic reticulum; GO:0016020 membrane; GO:0005783 endoplasmic reticulum; GO:0042175 nuclear outer membrane-endoplasmic reticulum membrane network; GO:0044421 extracellular region part; GO:0031410 cytoplasmic vesicle; GO:0071944 cell periphery; GO:0030054 cell junction; GO:0031982 vesicle; GO:0005737 cytoplasm; GO:0032991 macromolecular complex; GO:0031224 intrinsic componen…	GO:1901265 nucleoside phosphate binding; GO:0031625 ubiquitin protein ligase binding; GO:0016817 hydrolase activity, acting on acid anhydrides; GO:0016787 hydrolase activity; GO:0005515 protein binding; GO:0016887 ATPase activity; GO:0097159 organic cyclic compound binding; GO:1901363 heterocyclic compound binding; GO:0016462 pyrophosphatase activity; GO:0003824 catalytic activity; GO:0032553 rib…	K09490	HSPA5, BIP; heat shock 70kDa protein 5	hsa03060 Protein export; hsa04141 Protein processing in endoplasmic reticulum; hsa04612 Antigen processing and presentation; hsa04918 Thyroid hormone synthesis; hsa05020 Prion diseases	IPR029048; IPR029047;	Heat shock protein 70kD, C-terminal domain; Heat shock protein 70kD, peptide-binding domain;
Q92598	135	1.659	Up	0.00020381	K	Heat shock protein 105 kDa OS=Homo sapiens OX=9606 GN=HSPH1 PE=1 SV=1	HSPH1	1	1.99598e-06	72.585	K(1)PVTDCVISVPSFFTDAER	3	0.53078	1	0.698	0.742	0.722	1.273	1.184	1.129	cytoplasm	GO:0002694 regulation of leukocyte activation; GO:0032872 regulation of stress-activated MAPK cascade; GO:0010941 regulation of cell death; GO:0032270 positive regulation of cellular protein metabolic process; GO:0009891 positive regulation of biosynthetic process; GO:1901298 regulation of hydrogen peroxide-mediated programmed cell death; GO:0006458 'de novo' protein folding; GO:0035966 response …	GO:0044421 extracellular region part; GO:0005874 microtubule; GO:0031410 cytoplasmic vesicle; GO:0031982 vesicle; GO:0005737 cytoplasm; GO:0044433 cytoplasmic vesicle part; GO:0099512 supramolecular fiber; GO:0044424 intracellular part; GO:0005623 cell; GO:0099080 supramolecular complex; GO:0044422 organelle part; GO:0043228 non-membrane-bounded organelle; GO:0031974 membrane-enclosed lumen; GO:0…	GO:0005524 ATP binding; GO:1901265 nucleoside phosphate binding; GO:0060589 nucleoside-triphosphatase regulator activity; GO:0001882 nucleoside binding; GO:0043167 ion binding; GO:0015631 tubulin binding; GO:0005515 protein binding; GO:0043014 alpha-tubulin binding; GO:0000166 nucleotide binding; GO:0098772 molecular function regulator; GO:0097159 organic cyclic compound binding; GO:1901363 heter…	K09485	HSP110; heat shock protein 110kDa	hsa04141 Protein processing in endoplasmic reticulum	IPR029048; IPR029047;	Heat shock protein 70kD, C-terminal domain; Heat shock protein 70kD, peptide-binding domain;
Q9Y3F4	148	0.441	Down	3.7532e-05	K	Serine-threonine kinase receptor-associated protein OS=Homo sapiens OX=9606 GN=STRAP PE=1 SV=1	STRAP	1	0.00146412	96.229	K(1)ALWCSEDK	2	-0.98203	1	1.605	1.444	1.478	0.651	0.646	0.698	mitochondria	GO:0044085 cellular component biogenesis; GO:0022613 ribonucleoprotein complex biogenesis; GO:0065008 regulation of biological quality; GO:0010717 regulation of epithelial to mesenchymal transition; GO:0007586 digestion; GO:0022618 ribonucleoprotein complex assembly; GO:1903845 negative regulation of cellular response to transforming growth factor beta stimulus; GO:0044237 cellular metabolic proc…	GO:0043229 intracellular organelle; GO:0032797 SMN complex; GO:0044446 intracellular organelle part; GO:0005737 cytoplasm; GO:0031981 nuclear lumen; GO:0032991 macromolecular complex; GO:0044424 intracellular part; GO:0005829 cytosol; GO:0005623 cell; GO:0044422 organelle part; GO:0031974 membrane-enclosed lumen; GO:0043231 intracellular membrane-bounded organelle; GO:0043226 organelle; GO:000565…	GO:0097159 organic cyclic compound binding; GO:1901363 heterocyclic compound binding; GO:0003723 RNA binding; GO:0005515 protein binding; GO:0005102 receptor binding; GO:0005488 binding; GO:0003676 nucleic acid binding;	K13137	STRAP, UNRIP; serine-threonine kinase receptor-associated protein	hsa03013 RNA transport	IPR017986; IPR015943;	WD40-repeat-containing domain; WD40/YVTN repeat-like-containing domain;
Q9NRD5	88	2.812	Up	3.5799e-06	K	PRKCA-binding protein OS=Homo sapiens OX=9606 GN=PICK1 PE=1 SV=2	PICK1	1	0.0229749	55.261	VEVAK(1)MIQEVK	2	0.85616	1	0.484	0.504	0.458	1.401	1.307	1.358	cytoplasm	GO:0060627 regulation of vesicle-mediated transport; GO:0044700 single organism signaling; GO:0007205 protein kinase C-activating G-protein coupled receptor signaling pathway; GO:0021700 developmental maturation; GO:0065008 regulation of biological quality; GO:0022414 reproductive process; GO:0045161 neuronal ion channel clustering; GO:0030832 regulation of actin filament length; GO:0044237 cellu…	GO:0016020 membrane; GO:0031090 organelle membrane; GO:0031410 cytoplasmic vesicle; GO:0071944 cell periphery; GO:0030054 cell junction; GO:0031982 vesicle; GO:0005737 cytoplasm; GO:0044433 cytoplasmic vesicle part; GO:0044424 intracellular part; GO:0005623 cell; GO:0042734 presynaptic membrane; GO:0044422 organelle part; GO:0032279 asymmetric synapse; GO:0043228 non-membrane-bounded organelle; G…	GO:0051015 actin filament binding; GO:0005102 receptor binding; GO:0071933 Arp2/3 complex binding; GO:0019901 protein kinase binding; GO:0043167 ion binding; GO:0044877 macromolecular complex binding; GO:0016817 hydrolase activity, acting on acid anhydrides; GO:0016787 hydrolase activity; GO:0005515 protein binding; GO:0019900 kinase binding; GO:0017111 nucleoside-triphosphatase activity; GO:0016…				IPR010504; IPR027267; IPR001478;	Arfaptin homology (AH) domain; Arfaptin homology (AH) domain/BAR domain; PDZ domain;
P60981	132	0.502	Down	2.0415e-05	K	Destrin OS=Homo sapiens OX=9606 GN=DSTN PE=1 SV=3	DSTN	1	5.83098e-35	167.93	FQGIK(1)HECQANGPEDLNR	2	0.40928	8	1.452	1.424	1.416	0.742	0.734	0.677	mitochondria	GO:0050794 regulation of cellular process; GO:0016043 cellular component organization; GO:0065008 regulation of biological quality; GO:0032956 regulation of actin cytoskeleton organization; GO:0043243 positive regulation of protein complex disassembly; GO:0007015 actin filament organization; GO:0044699 single-organism process; GO:0030832 regulation of actin filament length; GO:0043241 protein com…	GO:0043229 intracellular organelle; GO:0044421 extracellular region part; GO:0005938 cell cortex; GO:0043232 intracellular non-membrane-bounded organelle; GO:0071944 cell periphery; GO:0044430 cytoskeletal part; GO:0099568 cytoplasmic region; GO:0044446 intracellular organelle part; GO:0005737 cytoplasm; GO:0031982 vesicle; GO:0030863 cortical cytoskeleton; GO:0030864 cortical actin cytoskeleton;…	GO:0051015 actin filament binding; GO:0008092 cytoskeletal protein binding; GO:0005488 binding; GO:0044877 macromolecular complex binding; GO:0003779 actin binding; GO:0005515 protein binding; GO:0032403 protein complex binding;	K10363	DSTN; destrin (actin-depolymerizing factor)		IPR029006; IPR002108;	ADF-H/Gelsolin-like domain; Actin-depolymerising factor homology domain;
P60981	30	0.396	Down	1.6318e-06	K	Destrin OS=Homo sapiens OX=9606 GN=DSTN PE=1 SV=3	DSTN	1	0.00172616	93.096	CSTPEEIK(1)K	3	-1.0849	3	1.589	1.587	1.536	0.613	0.602	0.649	mitochondria	GO:0050794 regulation of cellular process; GO:0016043 cellular component organization; GO:0065008 regulation of biological quality; GO:0032956 regulation of actin cytoskeleton organization; GO:0043243 positive regulation of protein complex disassembly; GO:0007015 actin filament organization; GO:0044699 single-organism process; GO:0030832 regulation of actin filament length; GO:0043241 protein com…	GO:0043229 intracellular organelle; GO:0044421 extracellular region part; GO:0005938 cell cortex; GO:0043232 intracellular non-membrane-bounded organelle; GO:0071944 cell periphery; GO:0044430 cytoskeletal part; GO:0099568 cytoplasmic region; GO:0044446 intracellular organelle part; GO:0005737 cytoplasm; GO:0031982 vesicle; GO:0030863 cortical cytoskeleton; GO:0030864 cortical actin cytoskeleton;…	GO:0051015 actin filament binding; GO:0008092 cytoskeletal protein binding; GO:0005488 binding; GO:0044877 macromolecular complex binding; GO:0003779 actin binding; GO:0005515 protein binding; GO:0032403 protein complex binding;	K10363	DSTN; destrin (actin-depolymerizing factor)		IPR029006; IPR002108;	ADF-H/Gelsolin-like domain; Actin-depolymerising factor homology domain;
A6NHR9	569	0.401	Down	5.6202e-05	K	Structural maintenance of chromosomes flexible hinge domain-containing protein 1 OS=Homo sapiens OX=9606 GN=SMCHD1 PE=1 SV=2	SMCHD1	1	0.00714345	72.928	DCHEK(1)YDK	3	3.8917	1	1.61	1.654	1.43	0.645	0.636	0.6	cytoplasm	GO:0010468 regulation of gene expression; GO:0040029 regulation of gene expression, epigenetic; GO:0016043 cellular component organization; GO:0050789 regulation of biological process; GO:0051276 chromosome organization; GO:0009048 dosage compensation by inactivation of X chromosome; GO:0007549 dosage compensation; GO:0060255 regulation of macromolecule metabolic process; GO:0006996 organelle org…	GO:0001740 Barr body; GO:0043229 intracellular organelle; GO:0043232 intracellular non-membrane-bounded organelle; GO:0000805 X chromosome; GO:0044446 intracellular organelle part; GO:0000803 sex chromosome; GO:0031981 nuclear lumen; GO:0044424 intracellular part; GO:0005623 cell; GO:0044422 organelle part; GO:0043228 non-membrane-bounded organelle; GO:0031974 membrane-enclosed lumen; GO:0043231 …	GO:0005524 ATP binding; GO:1901265 nucleoside phosphate binding; GO:0001882 nucleoside binding; GO:0043167 ion binding; GO:0005515 protein binding; GO:0000166 nucleotide binding; GO:0097159 organic cyclic compound binding; GO:1901363 heterocyclic compound binding; GO:0032549 ribonucleoside binding; GO:0097367 carbohydrate derivative binding; GO:0032553 ribonucleotide binding; GO:0005488 binding; …	K23113			IPR010935; IPR003594;	SMCs flexible hinge; Histidine kinase-like ATPase, C-terminal domain;
O75323	75	7.133	Up	3.9428e-07	K	Protein NipSnap homolog 2 OS=Homo sapiens OX=9606 GN=NIPSNAP2 PE=1 SV=1	NIPSNAP2	1	7.14122e-32	147.11	ETSNLYK(1)LQFHNVKPECLEAYNK	4	-0.2199	7	0.215	0.206	0.225	1.621	1.5	1.487	mitochondria	GO:0009116 nucleoside metabolic process; GO:0042278 purine nucleoside metabolic process; GO:0009167 purine ribonucleoside monophosphate metabolic process; GO:0009117 nucleotide metabolic process; GO:0044699 single-organism process; GO:0009058 biosynthetic process; GO:0009163 nucleoside biosynthetic process; GO:0046129 purine ribonucleoside biosynthetic process; GO:0009156 ribonucleoside monophosp…	GO:0043229 intracellular organelle; GO:0016020 membrane; GO:0031226 intrinsic component of plasma membrane; GO:0071944 cell periphery; GO:0005737 cytoplasm; GO:0031224 intrinsic component of membrane; GO:0044424 intracellular part; GO:0005887 integral component of plasma membrane; GO:0005623 cell; GO:0016021 integral component of membrane; GO:0005739 mitochondrion; GO:0005886 plasma membrane; GO:…	GO:0005515 protein binding; GO:0005488 binding;				IPR012577; IPR011008;	NIPSNAP; Dimeric alpha-beta barrel;
O75323	82	0.445	Down	1.4785e-06	K	Protein NipSnap homolog 2 OS=Homo sapiens OX=9606 GN=NIPSNAP2 PE=1 SV=1	NIPSNAP2	1	0.000148743	83.54	LQFHNVK(1)PECLEAYNK	3	-0.63134	2	1.546	1.481	1.482	0.69	0.659	0.656	mitochondria	GO:0009116 nucleoside metabolic process; GO:0042278 purine nucleoside metabolic process; GO:0009167 purine ribonucleoside monophosphate metabolic process; GO:0009117 nucleotide metabolic process; GO:0044699 single-organism process; GO:0009058 biosynthetic process; GO:0009163 nucleoside biosynthetic process; GO:0046129 purine ribonucleoside biosynthetic process; GO:0009156 ribonucleoside monophosp…	GO:0043229 intracellular organelle; GO:0016020 membrane; GO:0031226 intrinsic component of plasma membrane; GO:0071944 cell periphery; GO:0005737 cytoplasm; GO:0031224 intrinsic component of membrane; GO:0044424 intracellular part; GO:0005887 integral component of plasma membrane; GO:0005623 cell; GO:0016021 integral component of membrane; GO:0005739 mitochondrion; GO:0005886 plasma membrane; GO:…	GO:0005515 protein binding; GO:0005488 binding;				IPR012577; IPR011008;	NIPSNAP; Dimeric alpha-beta barrel;
Q6ZMY6	411	2.482	Up	0.000120911	K	WD repeat-containing protein 88 OS=Homo sapiens OX=9606 GN=WDR88 PE=2 SV=2	WDR88	1	0.0282668	54.787	AVGLK(1)LK	3	-0.41763	1	0.587	0.516	0.495	1.387	1.237	1.343	cytoplasm,nucleus			GO:0005515 protein binding; GO:0005488 binding;				IPR017986; IPR015943; IPR011047;	WD40-repeat-containing domain; WD40/YVTN repeat-like-containing domain; Quinoprotein alcohol dehydrogenase-like superfamily;
Q99611	391	0.546	Down	0.00020436	K	Selenide, water dikinase 2 OS=Homo sapiens OX=9606 GN=SEPHS2 PE=1 SV=3	SEPHS2	1	0.00629535	65.404	FCSEIK(1)SSK	3	0.27675	1	1.322	1.396	1.409	0.713	0.724	0.816	cytoplasm	GO:0016310 phosphorylation; GO:0016053 organic acid biosynthetic process; GO:0044699 single-organism process; GO:0009058 biosynthetic process; GO:1901566 organonitrogen compound biosynthetic process; GO:0044237 cellular metabolic process; GO:0006796 phosphate-containing compound metabolic process; GO:0071704 organic substance metabolic process; GO:0008152 metabolic process; GO:0006520 cellular am…		GO:0005524 ATP binding; GO:1901265 nucleoside phosphate binding; GO:0016781 phosphotransferase activity, paired acceptors; GO:0001882 nucleoside binding; GO:0043167 ion binding; GO:0000166 nucleotide binding; GO:0097159 organic cyclic compound binding; GO:1901363 heterocyclic compound binding; GO:0032549 ribonucleoside binding; GO:0097367 carbohydrate derivative binding; GO:0016301 kinase activit…	K01008	selD, SEPHS; selenide, water dikinase [EC:2.7.9.3]	hsa00450 Selenocompound metabolism; hsa01100 Metabolic pathways	IPR016188; IPR010918;	PurM-like, N-terminal domain; AIR synthase-related protein, C-terminal domain;
P36952	189	0.65	Down	0.00030077	K	Serpin B5 OS=Homo sapiens OX=9606 GN=SERPINB5 PE=1 SV=2	SERPINB5	1	0.0232251	84.083	VNK(1)TDTK	2	-1.5427	1	1.253	1.296	1.26	0.877	0.776	0.821	cytoplasm	GO:0048732 gland development; GO:0022414 reproductive process; GO:0044699 single-organism process; GO:0010466 negative regulation of peptidase activity; GO:0048729 tissue morphogenesis; GO:0050678 regulation of epithelial cell proliferation; GO:0044702 single organism reproductive process; GO:0030198 extracellular matrix organization; GO:0032502 developmental process; GO:0052548 regulation of end…	GO:0070062 extracellular exosome; GO:0043226 organelle; GO:0005615 extracellular space; GO:0044421 extracellular region part; GO:0044464 cell part; GO:0005622 intracellular; GO:0005737 cytoplasm; GO:0031982 vesicle; GO:1903561 extracellular vesicle; GO:0044424 intracellular part; GO:0005623 cell; GO:0043227 membrane-bounded organelle; GO:0005576 extracellular region; GO:0043230 extracellular orga…	GO:0004867 serine-type endopeptidase inhibitor activity; GO:0030234 enzyme regulator activity; GO:0005488 binding; GO:0030414 peptidase inhibitor activity; GO:0061134 peptidase regulator activity; GO:0005515 protein binding; GO:0061135 endopeptidase regulator activity; GO:0098772 molecular function regulator; GO:0004857 enzyme inhibitor activity; GO:0004866 endopeptidase inhibitor activity;	K10139	SERPINB5; serpin B5	hsa04115 p53 signaling pathway; hsa05206 MicroRNAs in cancer	IPR033836; IPR023796;	Maspin; Serpin domain;
Q9GZR7	17	0.492	Down	7.9084e-05	K	ATP-dependent RNA helicase DDX24 OS=Homo sapiens OX=9606 GN=DDX24 PE=1 SV=1	DDX24	1	0.00026351	110.92	QSSCGK(1)FQTK	3	0.27018	2	1.411	1.52	1.394	0.754	0.673	0.7	nucleus	GO:0006725 cellular aromatic compound metabolic process; GO:1901360 organic cyclic compound metabolic process; GO:0006807 nitrogen compound metabolic process; GO:0044238 primary metabolic process; GO:0044237 cellular metabolic process; GO:0071704 organic substance metabolic process; GO:0016070 RNA metabolic process; GO:0008152 metabolic process; GO:0090304 nucleic acid metabolic process; GO:00464…	GO:0043229 intracellular organelle; GO:0016020 membrane; GO:0043232 intracellular non-membrane-bounded organelle; GO:0044446 intracellular organelle part; GO:0031981 nuclear lumen; GO:0044424 intracellular part; GO:0005730 nucleolus; GO:0005623 cell; GO:0044422 organelle part; GO:0043228 non-membrane-bounded organelle; GO:0043226 organelle; GO:0043231 intracellular membrane-bounded organelle; GO:…	GO:1901265 nucleoside phosphate binding; GO:0008026 ATP-dependent helicase activity; GO:0016817 hydrolase activity, acting on acid anhydrides; GO:0016787 hydrolase activity; GO:0016887 ATPase activity; GO:1901363 heterocyclic compound binding; GO:0097159 organic cyclic compound binding; GO:0016462 pyrophosphatase activity; GO:0003824 catalytic activity; GO:0032553 ribonucleotide binding; GO:00054…	K14805	DDX24, MAK5; ATP-dependent RNA helicase DDX24/MAK5 [EC:3.6.4.13]		IPR011545; IPR014014; IPR027417; IPR014001; IPR001650;	DEAD/DEAH box helicase domain; RNA helicase, DEAD-box type, Q motif; P-loop containing nucleoside triphosphate hydrolase; Helicase superfamily 1/2, ATP-binding domain; Helicase, C-terminal;
P35080	91	0.569	Down	6.4911e-05	K	Profilin-2 OS=Homo sapiens OX=9606 GN=PFN2 PE=1 SV=3	PFN2	1	2.21305e-17	141.13	TK(1)SQGGEPTYNVAVGR	2	-0.6162	4	1.368	1.303	1.383	0.736	0.762	0.809	extracellular	GO:0060627 regulation of vesicle-mediated transport; GO:0030833 regulation of actin filament polymerization; GO:0001505 regulation of neurotransmitter levels; GO:0065008 regulation of biological quality; GO:0032270 positive regulation of cellular protein metabolic process; GO:0032273 positive regulation of protein polymerization; GO:0060491 regulation of cell projection assembly; GO:0010633 negat…	GO:0043229 intracellular organelle; GO:0042995 cell projection; GO:0044421 extracellular region part; GO:0043232 intracellular non-membrane-bounded organelle; GO:0031982 vesicle; GO:0005737 cytoplasm; GO:0044424 intracellular part; GO:0044463 cell projection part; GO:0005623 cell; GO:0005576 extracellular region; GO:0033267 axon part; GO:0043679 axon terminus; GO:0045202 synapse; GO:0043228 non-m…	GO:1901981 phosphatidylinositol phosphate binding; GO:1901265 nucleoside phosphate binding; GO:0060589 nucleoside-triphosphatase regulator activity; GO:0043167 ion binding; GO:0005515 protein binding; GO:0000166 nucleotide binding; GO:0098772 molecular function regulator; GO:1902936 phosphatidylinositol bisphosphate binding; GO:1901363 heterocyclic compound binding; GO:0097159 organic cyclic comp…	K05759	PFN; profilin	hsa04015 Rap1 signaling pathway; hsa04810 Regulation of actin cytoskeleton; hsa05131 Shigellosis; hsa05132 Salmonella infection
Q12797	646	0.392	Down	2.7434e-08	K	Aspartyl/asparaginyl beta-hydroxylase OS=Homo sapiens OX=9606 GN=ASPH PE=1 SV=3	ASPH	1	0.000150126	98.942	GAPK(1)TCTLLEK	3	0.49951	2	1.584	1.579	1.567	0.626	0.608	0.62	plasma membrane	GO:0044700 single organism signaling; GO:0050850 positive regulation of calcium-mediated signaling; GO:2000273 positive regulation of receptor activity; GO:0009593 detection of chemical stimulus; GO:0065008 regulation of biological quality; GO:0032270 positive regulation of cellular protein metabolic process; GO:0009891 positive regulation of biosynthetic process; GO:0046683 response to organopho…	GO:0016020 membrane; GO:0042175 nuclear outer membrane-endoplasmic reticulum membrane network; GO:0005783 endoplasmic reticulum; GO:0005938 cell cortex; GO:0031090 organelle membrane; GO:0071944 cell periphery; GO:0099568 cytoplasmic region; GO:0014701 junctional sarcoplasmic reticulum membrane; GO:0005737 cytoplasm; GO:0032991 macromolecular complex; GO:0031224 intrinsic component of membrane; G…	GO:0043167 ion binding; GO:0016705 oxidoreductase activity, acting on paired donors, with incorporation or reduction of molecular oxygen; GO:0005515 protein binding; GO:0016706 oxidoreductase activity, acting on paired donors, with incorporation or reduction of molecular oxygen, 2-oxoglutarate as one donor, and incorporation of one atom each of oxygen into both donors; GO:0008307 structural const…	K00476	ASPH; aspartate beta-hydroxylase [EC:1.14.11.16]	hsa04020 Calcium signaling pathway; hsa04260 Cardiac muscle contraction	IPR007943; IPR007803; IPR027443; IPR011990; IPR013026;	Aspartyl beta-hydroxylase/Triadin domain; Aspartyl/asparaginy/proline hydroxylase; Isopenicillin N synthase-like; Tetratricopeptide-like helical domain; Tetratricopeptide repeat-containing domain;
Q12797	336	1.771	Up	0.0099388	K	Aspartyl/asparaginyl beta-hydroxylase OS=Homo sapiens OX=9606 GN=ASPH PE=1 SV=3	ASPH	1	0.0197409	87.476	LLNK(1)FDK	2	2.2137	1	0.759	0.622	0.682	1.221	1.227	1.206	plasma membrane	GO:0044700 single organism signaling; GO:0050850 positive regulation of calcium-mediated signaling; GO:2000273 positive regulation of receptor activity; GO:0009593 detection of chemical stimulus; GO:0065008 regulation of biological quality; GO:0032270 positive regulation of cellular protein metabolic process; GO:0009891 positive regulation of biosynthetic process; GO:0046683 response to organopho…	GO:0016020 membrane; GO:0042175 nuclear outer membrane-endoplasmic reticulum membrane network; GO:0005783 endoplasmic reticulum; GO:0005938 cell cortex; GO:0031090 organelle membrane; GO:0071944 cell periphery; GO:0099568 cytoplasmic region; GO:0014701 junctional sarcoplasmic reticulum membrane; GO:0005737 cytoplasm; GO:0032991 macromolecular complex; GO:0031224 intrinsic component of membrane; G…	GO:0043167 ion binding; GO:0016705 oxidoreductase activity, acting on paired donors, with incorporation or reduction of molecular oxygen; GO:0005515 protein binding; GO:0016706 oxidoreductase activity, acting on paired donors, with incorporation or reduction of molecular oxygen, 2-oxoglutarate as one donor, and incorporation of one atom each of oxygen into both donors; GO:0008307 structural const…	K00476	ASPH; aspartate beta-hydroxylase [EC:1.14.11.16]	hsa04020 Calcium signaling pathway; hsa04260 Cardiac muscle contraction	IPR007943; IPR007803; IPR027443; IPR011990; IPR013026;	Aspartyl beta-hydroxylase/Triadin domain; Aspartyl/asparaginy/proline hydroxylase; Isopenicillin N synthase-like; Tetratricopeptide-like helical domain; Tetratricopeptide repeat-containing domain;
P18206	316	0.374	Down	3.9318e-05	K	Vinculin OS=Homo sapiens OX=9606 GN=VCL PE=1 SV=4	VCL	1	0.0100094	72.34	VGELCAGK(1)ER	2	-1.6995	1	1.722	1.618	1.478	0.627	0.582	0.593	cytoplasm	GO:0044085 cellular component biogenesis; GO:0097581 lamellipodium organization; GO:0065008 regulation of biological quality; GO:0007596 blood coagulation; GO:0003012 muscle system process; GO:0045321 leukocyte activation; GO:0048869 cellular developmental process; GO:0048666 neuron development; GO:0045216 cell-cell junction organization; GO:0032989 cellular component morphogenesis; GO:0022008 ne…	GO:0016020 membrane; GO:0044421 extracellular region part; GO:0098862 cluster of actin-based cell projections; GO:0098857 membrane microdomain; GO:1990357 terminal web; GO:0099568 cytoplasmic region; GO:0005737 cytoplasm; GO:0044433 cytoplasmic vesicle part; GO:0032991 macromolecular complex; GO:0005913 cell-cell adherens junction; GO:0099080 supramolecular complex; GO:0005623 cell; GO:1904813 fi…	GO:0051015 actin filament binding; GO:0031625 ubiquitin protein ligase binding; GO:0002162 dystroglycan binding; GO:0044877 macromolecular complex binding; GO:0005515 protein binding; GO:0045294 alpha-catenin binding; GO:0050839 cell adhesion molecule binding; GO:0097367 carbohydrate derivative binding; GO:0008092 cytoskeletal protein binding; GO:0005488 binding; GO:0045296 cadherin binding; GO:0…	K05700	VCL; vinculin	hsa04510 Focal adhesion; hsa04520 Adherens junction; hsa04670 Leukocyte transendothelial migration; hsa04810 Regulation of actin cytoskeleton; hsa05100 Bacterial invasion of epithelial cells; hsa05131 Shigellosis; hsa05146 Amoebiasis
P49207	43	0.605	Down	0.000135244	K	60S ribosomal protein L34 OS=Homo sapiens OX=9606 GN=RPL34 PE=1 SV=3	RPL34	1	0.000554268	78.324	APK(1)SACGVCPGR	3	0.12032	4	1.343	1.359	1.238	0.774	0.788	0.823	nucleus	GO:0044085 cellular component biogenesis; GO:0022613 ribonucleoprotein complex biogenesis; GO:0072594 establishment of protein localization to organelle; GO:0006518 peptide metabolic process; GO:0009058 biosynthetic process; GO:0044764 multi-organism cellular process; GO:0044237 cellular metabolic process; GO:0015031 protein transport; GO:0051234 establishment of localization; GO:0006605 protein …	GO:0044421 extracellular region part; GO:0031982 vesicle; GO:0005737 cytoplasm; GO:0032991 macromolecular complex; GO:0044424 intracellular part; GO:0005623 cell; GO:0044422 organelle part; GO:0043228 non-membrane-bounded organelle; GO:0070062 extracellular exosome; GO:0044391 ribosomal subunit; GO:0005622 intracellular; GO:0044464 cell part; GO:1903561 extracellular vesicle; GO:0044445 cytosolic…	GO:0097159 organic cyclic compound binding; GO:1901363 heterocyclic compound binding; GO:0050839 cell adhesion molecule binding; GO:0003723 RNA binding; GO:0005488 binding; GO:0045296 cadherin binding; GO:0003676 nucleic acid binding; GO:0005515 protein binding; GO:0005198 structural molecule activity; GO:0003735 structural constituent of ribosome;	K02915	RP-L34e, RPL34; large subunit ribosomal protein L34e	hsa03010 Ribosome
Q96DV4	148	2.049	Up	0.00029983	K	39S ribosomal protein L38, mitochondrial OS=Homo sapiens OX=9606 GN=MRPL38 PE=1 SV=2	MRPL38	1	0.00102008	84.083	TCGPYHK(1)QR	3	-0.20609	2	0.652	0.598	0.604	1.37	1.29	1.139	mitochondria	GO:0016043 cellular component organization; GO:0006518 peptide metabolic process; GO:0044267 cellular protein metabolic process; GO:0044699 single-organism process; GO:0009058 biosynthetic process; GO:1901566 organonitrogen compound biosynthetic process; GO:0044237 cellular metabolic process; GO:0071704 organic substance metabolic process; GO:0043241 protein complex disassembly; GO:0008152 metabo…	GO:0016020 membrane; GO:0031090 organelle membrane; GO:0005737 cytoplasm; GO:0032991 macromolecular complex; GO:0044424 intracellular part; GO:0005762 mitochondrial large ribosomal subunit; GO:0005623 cell; GO:0000313 organellar ribosome; GO:0044422 organelle part; GO:0043228 non-membrane-bounded organelle; GO:0005740 mitochondrial envelope; GO:0031974 membrane-enclosed lumen; GO:0070013 intracel…		K17419	MRPL38; large subunit ribosomal protein L38
Q8TDD1	667	1.501	Up	0.0015366	K	ATP-dependent RNA helicase DDX54 OS=Homo sapiens OX=9606 GN=DDX54 PE=1 SV=2	DDX54	1	0.0262812	46.643	RQRSGPNRGAK(1)R	2	3.8716	1	0.722	0.767	0.829	1.238	1.103	1.138	nucleus	GO:0044700 single organism signaling; GO:0097659 nucleic acid-templated transcription; GO:0044699 single-organism process; GO:0009058 biosynthetic process; GO:0051253 negative regulation of RNA metabolic process; GO:0071383 cellular response to steroid hormone stimulus; GO:0044237 cellular metabolic process; GO:0030520 intracellular estrogen receptor signaling pathway; GO:2001141 regulation of RN…	GO:0043229 intracellular organelle; GO:0016020 membrane; GO:0043232 intracellular non-membrane-bounded organelle; GO:0005737 cytoplasm; GO:0044446 intracellular organelle part; GO:0012505 endomembrane system; GO:0031981 nuclear lumen; GO:0044424 intracellular part; GO:0005730 nucleolus; GO:0005623 cell; GO:0044422 organelle part; GO:0043228 non-membrane-bounded organelle; GO:0043226 organelle; GO…	GO:1901265 nucleoside phosphate binding; GO:0005102 receptor binding; GO:0008026 ATP-dependent helicase activity; GO:0016817 hydrolase activity, acting on acid anhydrides; GO:0016787 hydrolase activity; GO:0005515 protein binding; GO:0051427 hormone receptor binding; GO:0016887 ATPase activity; GO:1901363 heterocyclic compound binding; GO:0097159 organic cyclic compound binding; GO:0016462 pyroph…	K14808	DDX54, DBP10; ATP-dependent RNA helicase DDX54/DBP10 [EC:3.6.4.13]		IPR014014; IPR011545; IPR012541; IPR027417; IPR014001; IPR001650;	RNA helicase, DEAD-box type, Q motif; DEAD/DEAH box helicase domain; DBP10, C-terminal; P-loop containing nucleoside triphosphate hydrolase; Helicase superfamily 1/2, ATP-binding domain; Helicase, C-terminal;
P17980	125	0.237	Down	4.4152e-05	K	26S proteasome regulatory subunit 6A OS=Homo sapiens OX=9606 GN=PSMC3 PE=1 SV=3	PSMC3	1	0.00143165	104.05	CAVIK(1)TSTR	2	-2.0264	1	1.899	1.947	1.692	0.467	0.463	0.384	cytoplasm	GO:0044700 single organism signaling; GO:0010608 posttranscriptional regulation of gene expression; GO:0043009 chordate embryonic development; GO:0051443 positive regulation of ubiquitin-protein transferase activity; GO:0009891 positive regulation of biosynthetic process; GO:0031347 regulation of defense response; GO:0010564 regulation of cell cycle process; GO:0044237 cellular metabolic process;…	GO:0016020 membrane; GO:0034774 secretory granule lumen; GO:0031410 cytoplasmic vesicle; GO:0005838 proteasome regulatory particle; GO:0000932 P-body; GO:0031982 vesicle; GO:0005737 cytoplasm; GO:0044433 cytoplasmic vesicle part; GO:0032991 macromolecular complex; GO:0044424 intracellular part; GO:0005623 cell; GO:1904813 ficolin-1-rich granule lumen; GO:0036464 cytoplasmic ribonucleoprotein gran…	GO:1901265 nucleoside phosphate binding; GO:0016817 hydrolase activity, acting on acid anhydrides; GO:0016787 hydrolase activity; GO:0005515 protein binding; GO:0016887 ATPase activity; GO:1901363 heterocyclic compound binding; GO:0097159 organic cyclic compound binding; GO:0016462 pyrophosphatase activity; GO:0042802 identical protein binding; GO:0032553 ribonucleotide binding; GO:0003824 cataly…	K03065	PSMC3, RPT5; 26S proteasome regulatory subunit T5	hsa03050 Proteasome; hsa05169 Epstein-Barr virus infection	IPR003593; IPR003959; IPR027417;	AAA+ ATPase domain; ATPase, AAA-type, core; P-loop containing nucleoside triphosphate hydrolase;
P17980	245	0.411	Down	4.732e-07	K	26S proteasome regulatory subunit 6A OS=Homo sapiens OX=9606 GN=PSMC3 PE=1 SV=3	PSMC3	1	1.931e-13	150.11	ACAAQTK(1)ATFLK	2	0.060852	2	1.561	1.511	1.576	0.622	0.649	0.638	cytoplasm	GO:0044700 single organism signaling; GO:0010608 posttranscriptional regulation of gene expression; GO:0043009 chordate embryonic development; GO:0051443 positive regulation of ubiquitin-protein transferase activity; GO:0009891 positive regulation of biosynthetic process; GO:0031347 regulation of defense response; GO:0010564 regulation of cell cycle process; GO:0044237 cellular metabolic process;…	GO:0016020 membrane; GO:0034774 secretory granule lumen; GO:0031410 cytoplasmic vesicle; GO:0005838 proteasome regulatory particle; GO:0000932 P-body; GO:0031982 vesicle; GO:0005737 cytoplasm; GO:0044433 cytoplasmic vesicle part; GO:0032991 macromolecular complex; GO:0044424 intracellular part; GO:0005623 cell; GO:1904813 ficolin-1-rich granule lumen; GO:0036464 cytoplasmic ribonucleoprotein gran…	GO:1901265 nucleoside phosphate binding; GO:0016817 hydrolase activity, acting on acid anhydrides; GO:0016787 hydrolase activity; GO:0005515 protein binding; GO:0016887 ATPase activity; GO:1901363 heterocyclic compound binding; GO:0097159 organic cyclic compound binding; GO:0016462 pyrophosphatase activity; GO:0042802 identical protein binding; GO:0032553 ribonucleotide binding; GO:0003824 cataly…	K03065	PSMC3, RPT5; 26S proteasome regulatory subunit T5	hsa03050 Proteasome; hsa05169 Epstein-Barr virus infection	IPR003593; IPR003959; IPR027417;	AAA+ ATPase domain; ATPase, AAA-type, core; P-loop containing nucleoside triphosphate hydrolase;
O94808	17	8.073	Up	1.7576e-06	K	Glutamine--fructose-6-phosphate aminotransferase [isomerizing] 2 OS=Homo sapiens OX=9606 GN=GFPT2 PE=1 SV=3	GFPT2	1	0.00410597	83.862	K(1)EIFETLIK	2	-0.77241	3	0.206	0.199	0.171	1.548	1.576	1.526	mitochondria	GO:0009226 nucleotide-sugar biosynthetic process; GO:0006725 cellular aromatic compound metabolic process; GO:0006541 glutamine metabolic process; GO:0044699 single-organism process; GO:0006002 fructose 6-phosphate metabolic process; GO:0009058 biosynthetic process; GO:0006112 energy reserve metabolic process; GO:0044237 cellular metabolic process; GO:0006796 phosphate-containing compound metabol…	GO:0044464 cell part; GO:0005622 intracellular; GO:0005737 cytoplasm; GO:0044424 intracellular part; GO:0005829 cytosol; GO:0005623 cell; GO:0044444 cytoplasmic part;	GO:0016769 transferase activity, transferring nitrogenous groups; GO:0097367 carbohydrate derivative binding; GO:0070548 L-glutamine aminotransferase activity; GO:0003824 catalytic activity; GO:0005488 binding; GO:0030246 carbohydrate binding; GO:0005515 protein binding; GO:0008483 transaminase activity; GO:0016740 transferase activity; GO:0004360 glutamine-fructose-6-phosphate transaminase (isom…	K00820	glmS, GFPT; glucosamine---fructose-6-phosphate aminotransferase (isomerizing) [EC:2.6.1.16]	hsa00250 Alanine, aspartate and glutamate metabolism; hsa00520 Amino sugar and nucleotide sugar metabolism; hsa01100 Metabolic pathways; hsa04931 Insulin resistance	IPR001347; IPR029055; IPR017932;	Sugar isomerase (SIS); Nucleophile aminohydrolases, N-terminal; Glutamine amidotransferase type 2 domain;
Q7Z6Z7	476	0.494	Down	0.00024261	K	E3 ubiquitin-protein ligase HUWE1 OS=Homo sapiens OX=9606 GN=HUWE1 PE=1 SV=3	HUWE1	1	0.00238767	90.15	ECPFVIK(1)PK	3	-0.18576	2	1.503	1.397	1.415	0.66	0.686	0.785	plasma membrane	GO:0045321 leukocyte activation; GO:1903955 positive regulation of protein targeting to mitochondrion; GO:1903533 regulation of protein targeting; GO:0048869 cellular developmental process; GO:0044699 single-organism process; GO:0010821 regulation of mitochondrion organization; GO:0044237 cellular metabolic process; GO:1903749 positive regulation of establishment of protein localization to mitoch…	GO:0016020 membrane; GO:0034774 secretory granule lumen; GO:0044421 extracellular region part; GO:0031410 cytoplasmic vesicle; GO:0031982 vesicle; GO:0005737 cytoplasm; GO:0044433 cytoplasmic vesicle part; GO:0044424 intracellular part; GO:0005623 cell; GO:1904813 ficolin-1-rich granule lumen; GO:0044422 organelle part; GO:0070062 extracellular exosome; GO:0101002 ficolin-1-rich granule; GO:00319…	GO:0097159 organic cyclic compound binding; GO:1901363 heterocyclic compound binding; GO:0003677 DNA binding; GO:0003723 RNA binding; GO:0019787 ubiquitin-like protein transferase activity; GO:0003824 catalytic activity; GO:0005488 binding; GO:0004842 ubiquitin-protein transferase activity; GO:0003676 nucleic acid binding; GO:0005515 protein binding; GO:0016740 transferase activity;	K10592	HUWE1, MULE, ARF-BP1; E3 ubiquitin-protein ligase HUWE1 [EC:2.3.2.26]	hsa04120 Ubiquitin mediated proteolysis	IPR025527; IPR004170; IPR015940; IPR010314; IPR000569; IPR010309; IPR016024; IPR009060;	Domain of unknown function DUF4414; WWE domain; Ubiquitin-associated domain; E3 ubiquitin ligase, domain of unknown function DUF913; HECT domain; E3 ubiquitin ligase, domain of unknown function DUF908; Armadillo-type fold; UBA-like;
P47985	101	1.523	Up	0.031261	K	Cytochrome b-c1 complex subunit Rieske, mitochondrial OS=Homo sapiens OX=9606 GN=UQCRFS1 PE=1 SV=2	UQCRFS1	1	0.00038399	92.99	LEVLDSTK(1)SSR	2	-1.559	1	0.714	0.657	0.922	1.111	1.353	1.029	mitochondria	GO:0009116 nucleoside metabolic process; GO:0042278 purine nucleoside metabolic process; GO:0009167 purine ribonucleoside monophosphate metabolic process; GO:0009117 nucleotide metabolic process; GO:0044699 single-organism process; GO:0044237 cellular metabolic process; GO:0006796 phosphate-containing compound metabolic process; GO:0051234 establishment of localization; GO:0006122 mitochondrial e…	GO:0016020 membrane; GO:0098800 inner mitochondrial membrane protein complex; GO:0031090 organelle membrane; GO:0098796 membrane protein complex; GO:0005737 cytoplasm; GO:0032991 macromolecular complex; GO:0031224 intrinsic component of membrane; GO:0098798 mitochondrial protein complex; GO:0044424 intracellular part; GO:0044455 mitochondrial membrane part; GO:0005623 cell; GO:0044422 organelle p…	GO:0051537 2 iron, 2 sulfur cluster binding; GO:0008121 ubiquinol-cytochrome-c reductase activity; GO:0015075 ion transmembrane transporter activity; GO:0016679 oxidoreductase activity, acting on diphenols and related substances as donors; GO:0044877 macromolecular complex binding; GO:0043167 ion binding; GO:0022892 substrate-specific transporter activity; GO:0005515 protein binding; GO:0015077 m…	K00411	UQCRFS1, RIP1, petA; ubiquinol-cytochrome c reductase iron-sulfur subunit [EC:1.10.2.2]	hsa00190 Oxidative phosphorylation; hsa01100 Metabolic pathways; hsa04260 Cardiac muscle contraction; hsa04714 Thermogenesis; hsa04932 Non-alcoholic fatty liver disease (NAFLD); hsa05010 Alzheimer disease; hsa05012 Parkinson disease; hsa05016 Huntington disease	IPR006317; IPR017941; IPR015248; IPR005805; IPR011070; IPR004192;	Ubiquinol-cytochrome c reductase, iron-sulphur subunit; Rieske [2Fe-2S] iron-sulphur domain; Ubiquinol-cytochrome c reductase 8kDa, N-terminal; Rieske iron-sulphur protein, C-terminal; Globular protein, non-globular alpha/beta subunit; Ubiquinol cytochrome reductase, transmembrane domain;
P55072	651	1.786	Up	0.0026628	K	Transitional endoplasmic reticulum ATPase OS=Homo sapiens OX=9606 GN=VCP PE=1 SV=4	VCP	1	0.0111412	42.095	LDQLIYIPLPDEK(1)SR	3	-0.55872	1	0.764	0.576	0.709	1.167	1.218	1.275	cytoplasm,nucleus	GO:0044085 cellular component biogenesis; GO:0044700 single organism signaling; GO:0010941 regulation of cell death; GO:0032436 positive regulation of proteasomal ubiquitin-dependent protein catabolic process; GO:0009891 positive regulation of biosynthetic process; GO:0018196 peptidyl-asparagine modification; GO:0006914 autophagy; GO:0044237 cellular metabolic process; GO:1903364 positive regulat…	GO:0016020 membrane; GO:0044421 extracellular region part; GO:0005737 cytoplasm; GO:0044433 cytoplasmic vesicle part; GO:0032991 macromolecular complex; GO:0035578 azurophil granule lumen; GO:0005623 cell; GO:1904813 ficolin-1-rich granule lumen; GO:0044422 organelle part; GO:0043228 non-membrane-bounded organelle; GO:0005775 vacuolar lumen; GO:0070062 extracellular exosome; GO:0101002 ficolin-1-…	GO:1901265 nucleoside phosphate binding; GO:0019903 protein phosphatase binding; GO:0031625 ubiquitin protein ligase binding; GO:0005102 receptor binding; GO:0061134 peptidase regulator activity; GO:0016504 peptidase activator activity; GO:0016817 hydrolase activity, acting on acid anhydrides; GO:0035800 deubiquitinase activator activity; GO:0016787 hydrolase activity; GO:0005515 protein binding;…	K13525	VCP, CDC48; transitional endoplasmic reticulum ATPase	hsa04141 Protein processing in endoplasmic reticulum; hsa05134 Legionellosis	IPR029067; IPR003959; IPR015415; IPR004201; IPR027417; IPR003593; IPR009010; IPR003338;	CDC48 domain 2-like; ATPase, AAA-type, core; Vps4 oligomerisation, C-terminal; CDC48, domain 2; P-loop containing nucleoside triphosphate hydrolase; AAA+ ATPase domain; Aspartate decarboxylase-like domain; CDC48, N-terminal subdomain;
P02753	107	1.841	Up	6.0848e-05	K	Retinol-binding protein 4 OS=Homo sapiens OX=9606 GN=RBP4 PE=1 SV=3	RBP4	1	0.000780174	73.881	MK(1)YWGVASFLQK	3	-0.60003	1	0.627	0.685	0.692	1.249	1.248	1.193	extracellular	GO:0065008 regulation of biological quality; GO:0007586 digestion; GO:0060042 retina morphogenesis in camera-type eye; GO:0007601 visual perception; GO:0022414 reproductive process; GO:0006066 alcohol metabolic process; GO:0030323 respiratory tube development; GO:0043009 chordate embryonic development; GO:0050796 regulation of insulin secretion; GO:0042593 glucose homeostasis; GO:1901862 negative…	GO:0005615 extracellular space; GO:0044421 extracellular region part; GO:0005737 cytoplasm; GO:0031982 vesicle; GO:0032991 macromolecular complex; GO:0044424 intracellular part; GO:0005623 cell; GO:0005829 cytosol; GO:0005576 extracellular region; GO:0043226 organelle; GO:0070062 extracellular exosome; GO:0005622 intracellular; GO:0044464 cell part; GO:1903561 extracellular vesicle; GO:0043234 pr…	GO:0019842 vitamin binding; GO:0046982 protein heterodimerization activity; GO:0019841 retinol binding; GO:0046983 protein dimerization activity; GO:0005501 retinoid binding; GO:0005319 lipid transporter activity; GO:0022892 substrate-specific transporter activity; GO:0051183 vitamin transporter activity; GO:0005515 protein binding; GO:0019840 isoprenoid binding; GO:0034632 retinol transporter ac…	K18271	RBP4; retinol-binding protein 4		IPR012674; IPR000566; IPR011038;	Calycin; Lipocalin/cytosolic fatty-acid binding domain; Calycin-like;
O75531	6	1.971	Up	0.00055745	K	Barrier-to-autointegration factor OS=Homo sapiens OX=9606 GN=BANF1 PE=1 SV=1	BANF1	1	0.0231461	58.119	TTSQK(1)HR	2	-0.95945	1	0.693	0.598	0.613	1.202	1.173	1.377	extracellular	GO:0046907 intracellular transport; GO:0016043 cellular component organization; GO:0006997 nucleus organization; GO:0010256 endomembrane system organization; GO:0019043 establishment of viral latency; GO:0006725 cellular aromatic compound metabolic process; GO:0006259 DNA metabolic process; GO:0044699 single-organism process; GO:0051169 nuclear transport; GO:0043207 response to external biotic st…	GO:0043229 intracellular organelle; GO:0044421 extracellular region part; GO:0043232 intracellular non-membrane-bounded organelle; GO:0044446 intracellular organelle part; GO:0031982 vesicle; GO:0005737 cytoplasm; GO:0031981 nuclear lumen; GO:0044424 intracellular part; GO:0005623 cell; GO:0005829 cytosol; GO:0005576 extracellular region; GO:0044422 organelle part; GO:0043228 non-membrane-bounded…	GO:0097159 organic cyclic compound binding; GO:1901363 heterocyclic compound binding; GO:0003677 DNA binding; GO:0042802 identical protein binding; GO:0047485 protein N-terminus binding; GO:0097726 LEM domain binding; GO:0042803 protein homodimerization activity; GO:0005488 binding; GO:0046983 protein dimerization activity; GO:0003676 nucleic acid binding; GO:0008022 protein C-terminus binding; G…	K21870	BANF1; barrier-to-autointegration factor
Q9UHD1	215	0.358	Down	0.00153592	K	Cysteine and histidine-rich domain-containing protein 1 OS=Homo sapiens OX=9606 GN=CHORDC1 PE=1 SV=2	CHORDC1	1	0.0322207	55.676	GK(1)HMWTK	3	-1.3379	1	1.634	1.62	1.626	0.538	0.614	0.597	cytoplasm	GO:0045859 regulation of protein kinase activity; GO:0050794 regulation of cellular process; GO:2000298 regulation of Rho-dependent protein serine/threonine kinase activity; GO:0060255 regulation of macromolecule metabolic process; GO:0061077 chaperone-mediated protein folding; GO:0031399 regulation of protein modification process; GO:0080134 regulation of response to stress; GO:0031324 negative …		GO:0005524 ATP binding; GO:0031072 heat shock protein binding; GO:1901265 nucleoside phosphate binding; GO:0001882 nucleoside binding; GO:0043167 ion binding; GO:0051879 Hsp90 protein binding; GO:0005515 protein binding; GO:0000166 nucleotide binding; GO:0008270 zinc ion binding; GO:0097159 organic cyclic compound binding; GO:1901363 heterocyclic compound binding; GO:0032549 ribonucleoside bindin…	K16729	CHORDC1, CHP1; cysteine and histidine-rich domain-containing protein 1		IPR007052; IPR007051; IPR008978;	CS domain; CHORD domain; HSP20-like chaperone;
Q9UHD1	89	0.477	Down	9.4199e-08	K	Cysteine and histidine-rich domain-containing protein 1 OS=Homo sapiens OX=9606 GN=CHORDC1 PE=1 SV=2	CHORDC1	1	0.0122898	66.568	ELCELK(1)PK	3	0.27689	5	1.478	1.456	1.447	0.707	0.689	0.695	cytoplasm	GO:0045859 regulation of protein kinase activity; GO:0050794 regulation of cellular process; GO:2000298 regulation of Rho-dependent protein serine/threonine kinase activity; GO:0060255 regulation of macromolecule metabolic process; GO:0061077 chaperone-mediated protein folding; GO:0031399 regulation of protein modification process; GO:0080134 regulation of response to stress; GO:0031324 negative …		GO:0005524 ATP binding; GO:0031072 heat shock protein binding; GO:1901265 nucleoside phosphate binding; GO:0001882 nucleoside binding; GO:0043167 ion binding; GO:0051879 Hsp90 protein binding; GO:0005515 protein binding; GO:0000166 nucleotide binding; GO:0008270 zinc ion binding; GO:0097159 organic cyclic compound binding; GO:1901363 heterocyclic compound binding; GO:0032549 ribonucleoside bindin…	K16729	CHORDC1, CHP1; cysteine and histidine-rich domain-containing protein 1		IPR007052; IPR007051; IPR008978;	CS domain; CHORD domain; HSP20-like chaperone;
P62136	41	0.561	Down	0.000119643	K	Serine/threonine-protein phosphatase PP1-alpha catalytic subunit OS=Homo sapiens OX=9606 GN=PPP1CA PE=1 SV=1	PPP1CA	1	0.0182236	88.954	GLCLK(1)SR	2	0.99693	1	1.421	1.279	1.382	0.769	0.732	0.791	cytoplasm	GO:0044700 single organism signaling; GO:0010941 regulation of cell death; GO:0065008 regulation of biological quality; GO:0005981 regulation of glycogen catabolic process; GO:0032885 regulation of polysaccharide biosynthetic process; GO:0007166 cell surface receptor signaling pathway; GO:0030323 respiratory tube development; GO:0010608 posttranscriptional regulation of gene expression; GO:004355…	GO:0016020 membrane; GO:0030425 dendrite; GO:0044421 extracellular region part; GO:0071944 cell periphery; GO:0030054 cell junction; GO:0031982 vesicle; GO:0005737 cytoplasm; GO:0043025 neuronal cell body; GO:0032991 macromolecular complex; GO:0008287 protein serine/threonine phosphatase complex; GO:0044424 intracellular part; GO:0005913 cell-cell adherens junction; GO:0072357 PTW/PP1 phosphatase…	GO:0019903 protein phosphatase binding; GO:0004722 protein serine/threonine phosphatase activity; GO:0016791 phosphatase activity; GO:0044877 macromolecular complex binding; GO:0043167 ion binding; GO:0005515 protein binding; GO:0016787 hydrolase activity; GO:0004721 phosphoprotein phosphatase activity; GO:0098632 protein binding involved in cell-cell adhesion; GO:0050839 cell adhesion molecule b…	K06269	PPP1C; serine/threonine-protein phosphatase PP1 catalytic subunit [EC:3.1.3.16]	hsa03015 mRNA surveillance pathway; hsa04022 cGMP-PKG signaling pathway; hsa04024 cAMP signaling pathway; hsa04114 Oocyte meiosis; hsa04218 Cellular senescence; hsa04261 Adrenergic signaling in cardiomyocytes; hsa04270 Vascular smooth muscle contraction; hsa04390 Hippo signaling pathway; hsa04510 Focal adhesion; hsa04611 Platelet activation; hsa04720 Long-term potentiation; hsa04728 Dopaminergic …	IPR029052; IPR004843; IPR031675; IPR006186;	Metallo-dependent phosphatase-like; Calcineurin-like phosphoesterase domain, ApaH type; Serine-threonine protein phosphatase, N-terminal; Serine/threonine-specific protein phosphatase/bis(5-nucleosyl)-tetraphosphatase;
Q99497	62	0.381	Down	2.1387e-05	K	Protein/nucleic acid deglycase DJ-1 OS=Homo sapiens OX=9606 GN=PARK7 PE=1 SV=2	PARK7	1	2.72946e-27	162.29	DVVICPDASLEDAK(1)K	2	-0.16613	1	1.505	1.635	1.635	0.609	0.57	0.638	cytoplasm	GO:0044700 single organism signaling; GO:1905258 regulation of nitrosative stress-induced intrinsic apoptotic signaling pathway; GO:0051349 positive regulation of lyase activity; GO:0022414 reproductive process; GO:0006066 alcohol metabolic process; GO:0032091 negative regulation of protein binding; GO:0044237 cellular metabolic process; GO:0098869 cellular oxidant detoxification; GO:0018158 prot…	GO:0016020 membrane; GO:0044421 extracellular region part; GO:0098857 membrane microdomain; GO:0005737 cytoplasm; GO:0005913 cell-cell adherens junction; GO:0005623 cell; GO:0044422 organelle part; GO:0043228 non-membrane-bounded organelle; GO:0070062 extracellular exosome; GO:0016605 PML body; GO:0005654 nucleoplasm; GO:0005622 intracellular; GO:0098589 membrane region; GO:0043005 neuron project…	GO:0008233 peptidase activity; GO:0005102 receptor binding; GO:0044388 small protein activating enzyme binding; GO:0046983 protein dimerization activity; GO:0097110 scaffold protein binding; GO:0050681 androgen receptor binding; GO:0016787 hydrolase activity; GO:0005515 protein binding; GO:0051427 hormone receptor binding; GO:0005507 copper ion binding; GO:0098772 molecular function regulator; GO…	K05687	PARK7; protein DJ-1 [EC:3.5.1.124]	hsa05012 Parkinson disease	IPR029062; IPR002818;	Class I glutamine amidotransferase-like; DJ-1/PfpI;
Q7L014	363	0.502	Down	1.5775e-05	K	Probable ATP-dependent RNA helicase DDX46 OS=Homo sapiens OX=9606 GN=DDX46 PE=1 SV=2	DDX46	1	0.000508415	92.19	LEMEGITVK(1)GK	2	1.3083	1	1.441	1.439	1.407	0.686	0.717	0.747	nucleus	GO:0006396 RNA processing; GO:0010468 regulation of gene expression; GO:0006725 cellular aromatic compound metabolic process; GO:0060255 regulation of macromolecule metabolic process; GO:0006807 nitrogen compound metabolic process; GO:1901360 organic cyclic compound metabolic process; GO:0044238 primary metabolic process; GO:0044237 cellular metabolic process; GO:0071704 organic substance metabol…	GO:0043229 intracellular organelle; GO:0016020 membrane; GO:0043232 intracellular non-membrane-bounded organelle; GO:0044446 intracellular organelle part; GO:0031981 nuclear lumen; GO:0044424 intracellular part; GO:0044452 nucleolar part; GO:0005730 nucleolus; GO:0016604 nuclear body; GO:0005623 cell; GO:0001650 fibrillar center; GO:0015030 Cajal body; GO:0044422 organelle part; GO:0043228 non-me…	GO:1901265 nucleoside phosphate binding; GO:0008026 ATP-dependent helicase activity; GO:0016817 hydrolase activity, acting on acid anhydrides; GO:0016787 hydrolase activity; GO:0016887 ATPase activity; GO:1901363 heterocyclic compound binding; GO:0097159 organic cyclic compound binding; GO:0016462 pyrophosphatase activity; GO:0003824 catalytic activity; GO:0032553 ribonucleotide binding; GO:00054…	K12811	DDX46, PRP5; ATP-dependent RNA helicase DDX46/PRP5 [EC:3.6.4.13]	hsa03040 Spliceosome	IPR011545; IPR014014; IPR014001; IPR027417; IPR001650;	DEAD/DEAH box helicase domain; RNA helicase, DEAD-box type, Q motif; Helicase superfamily 1/2, ATP-binding domain; P-loop containing nucleoside triphosphate hydrolase; Helicase, C-terminal;
Q7L014	776	2.162	Up	1.93599e-05	K	Probable ATP-dependent RNA helicase DDX46 OS=Homo sapiens OX=9606 GN=DDX46 PE=1 SV=2	DDX46	1	0.0024018	81.92	SSGFSGK(1)GFK	2	-0.073836	1	0.567	0.629	0.581	1.291	1.292	1.258	nucleus	GO:0006396 RNA processing; GO:0010468 regulation of gene expression; GO:0006725 cellular aromatic compound metabolic process; GO:0060255 regulation of macromolecule metabolic process; GO:0006807 nitrogen compound metabolic process; GO:1901360 organic cyclic compound metabolic process; GO:0044238 primary metabolic process; GO:0044237 cellular metabolic process; GO:0071704 organic substance metabol…	GO:0043229 intracellular organelle; GO:0016020 membrane; GO:0043232 intracellular non-membrane-bounded organelle; GO:0044446 intracellular organelle part; GO:0031981 nuclear lumen; GO:0044424 intracellular part; GO:0044452 nucleolar part; GO:0005730 nucleolus; GO:0016604 nuclear body; GO:0005623 cell; GO:0001650 fibrillar center; GO:0015030 Cajal body; GO:0044422 organelle part; GO:0043228 non-me…	GO:1901265 nucleoside phosphate binding; GO:0008026 ATP-dependent helicase activity; GO:0016817 hydrolase activity, acting on acid anhydrides; GO:0016787 hydrolase activity; GO:0016887 ATPase activity; GO:1901363 heterocyclic compound binding; GO:0097159 organic cyclic compound binding; GO:0016462 pyrophosphatase activity; GO:0003824 catalytic activity; GO:0032553 ribonucleotide binding; GO:00054…	K12811	DDX46, PRP5; ATP-dependent RNA helicase DDX46/PRP5 [EC:3.6.4.13]	hsa03040 Spliceosome	IPR011545; IPR014014; IPR014001; IPR027417; IPR001650;	DEAD/DEAH box helicase domain; RNA helicase, DEAD-box type, Q motif; Helicase superfamily 1/2, ATP-binding domain; P-loop containing nucleoside triphosphate hydrolase; Helicase, C-terminal;
P16152	148	0.562	Down	3.0696e-06	K	Carbonyl reductase [NADPH] 1 OS=Homo sapiens OX=9606 GN=CBR1 PE=1 SV=3	CBR1	1	1.16643e-09	133.16	ALK(1)SCSPELQQK	2	0.15889	2	1.322	1.372	1.382	0.781	0.749	0.762	cytoplasm	GO:0019371 cyclooxygenase pathway; GO:0033559 unsaturated fatty acid metabolic process; GO:0019369 arachidonic acid metabolic process; GO:0016053 organic acid biosynthetic process; GO:0048869 cellular developmental process; GO:1901568 fatty acid derivative metabolic process; GO:0044699 single-organism process; GO:0009058 biosynthetic process; GO:0044255 cellular lipid metabolic process; GO:004423…	GO:0070062 extracellular exosome; GO:0043226 organelle; GO:0044421 extracellular region part; GO:0044464 cell part; GO:0005622 intracellular; GO:0005737 cytoplasm; GO:0031982 vesicle; GO:1903561 extracellular vesicle; GO:0044424 intracellular part; GO:0005829 cytosol; GO:0005623 cell; GO:0043227 membrane-bounded organelle; GO:0005576 extracellular region; GO:0043230 extracellular organelle; GO:00…	GO:0016614 oxidoreductase activity, acting on CH-OH group of donors; GO:0016651 oxidoreductase activity, acting on NAD(P)H; GO:0016616 oxidoreductase activity, acting on the CH-OH group of donors, NAD or NADP as acceptor; GO:0003824 catalytic activity; GO:0004090 carbonyl reductase (NADPH) activity; GO:0050221 prostaglandin-E2 9-reductase activity; GO:0047021 15-hydroxyprostaglandin dehydrogenase…	K00079	CBR1; carbonyl reductase 1 [EC:1.1.1.184 1.1.1.189 1.1.1.197]	hsa00590 Arachidonic acid metabolism; hsa00790 Folate biosynthesis; hsa00980 Metabolism of xenobiotics by cytochrome P450; hsa01100 Metabolic pathways; hsa05204 Chemical carcinogenesis	IPR016040;	NAD(P)-binding domain;
Q8WUM4	234	0.284	Down	9.0293e-07	K	Programmed cell death 6-interacting protein OS=Homo sapiens OX=9606 GN=PDCD6IP PE=1 SV=1	PDCD6IP	1	4.05874e-05	122.7	QCQYK(1)DTLPK	2	-2.2661	2	1.797	1.8	1.665	0.489	0.513	0.495	cytoplasm	GO:0060627 regulation of vesicle-mediated transport; GO:0044085 cellular component biogenesis; GO:0065008 regulation of biological quality; GO:0010256 endomembrane system organization; GO:0035088 establishment or maintenance of apical/basal cell polarity; GO:0045216 cell-cell junction organization; GO:0051046 regulation of secretion; GO:0044699 single-organism process; GO:0032506 cytokinetic proc…	GO:0016020 membrane; GO:0005783 endoplasmic reticulum; GO:0044421 extracellular region part; GO:0031410 cytoplasmic vesicle; GO:0071944 cell periphery; GO:0030054 cell junction; GO:0031982 vesicle; GO:0005737 cytoplasm; GO:0044424 intracellular part; GO:0005623 cell; GO:0044422 organelle part; GO:0048770 pigment granule; GO:0043228 non-membrane-bounded organelle; GO:0005856 cytoskeleton; GO:00700…	GO:0042802 identical protein binding; GO:0005102 receptor binding; GO:0042803 protein homodimerization activity; GO:0005488 binding; GO:0046983 protein dimerization activity; GO:0005515 protein binding; GO:0001664 G-protein coupled receptor binding; GO:0048306 calcium-dependent protein binding; GO:0031871 proteinase activated receptor binding;	K12200	PDCD6IP, ALIX, RIM20; programmed cell death 6-interacting protein	hsa04144 Endocytosis	IPR025304; IPR004328;	ALIX V-shaped domain; BRO1 domain;
Q13404	74	0.415	Down	2.4772e-06	K	Ubiquitin-conjugating enzyme E2 variant 1 OS=Homo sapiens OX=9606 GN=UBE2V1 PE=1 SV=2	UBE2V1	1	9.06432e-22	150.39	IECGPK(1)YPEAPPFVR	2	0.05563	2	1.479	1.531	1.616	0.639	0.633	0.647	cytoplasm	GO:0044700 single organism signaling; GO:0032270 positive regulation of cellular protein metabolic process; GO:0002220 innate immune response activating cell surface receptor signaling pathway; GO:0007166 cell surface receptor signaling pathway; GO:0009891 positive regulation of biosynthetic process; GO:0035872 nucleotide-binding domain, leucine rich repeat containing receptor signaling pathway; …	GO:0044421 extracellular region part; GO:0031982 vesicle; GO:0005737 cytoplasm; GO:0032991 macromolecular complex; GO:0044424 intracellular part; GO:0005623 cell; GO:0044422 organelle part; GO:0031974 membrane-enclosed lumen; GO:0035370 UBC13-UEV1A complex; GO:0070062 extracellular exosome; GO:0005654 nucleoplasm; GO:1902494 catalytic complex; GO:0070013 intracellular organelle lumen; GO:0005622 …	GO:0061630 ubiquitin protein ligase activity; GO:0019787 ubiquitin-like protein transferase activity; GO:0031625 ubiquitin protein ligase binding; GO:0003824 catalytic activity; GO:0005488 binding; GO:0004842 ubiquitin-protein transferase activity; GO:0005515 protein binding; GO:0061659 ubiquitin-like protein ligase activity; GO:0044389 ubiquitin-like protein ligase binding; GO:0016740 transferas…	K10704	UBE2V; ubiquitin-conjugating enzyme E2 variant	hsa05131 Shigellosis	IPR016135; IPR000608;	Ubiquitin-conjugating enzyme/RWD-like; Ubiquitin-conjugating enzyme E2;
Q13404	68	0.374	Down	0.00131879	K	Ubiquitin-conjugating enzyme E2 variant 1 OS=Homo sapiens OX=9606 GN=UBE2V1 PE=1 SV=2	UBE2V1	1	1.94405e-08	143.42	IYSLK(1)IECGPK	2	-0.073126	2	1.601	1.602	1.612	0.636	0.601	0.562	cytoplasm	GO:0044700 single organism signaling; GO:0032270 positive regulation of cellular protein metabolic process; GO:0002220 innate immune response activating cell surface receptor signaling pathway; GO:0007166 cell surface receptor signaling pathway; GO:0009891 positive regulation of biosynthetic process; GO:0035872 nucleotide-binding domain, leucine rich repeat containing receptor signaling pathway; …	GO:0044421 extracellular region part; GO:0031982 vesicle; GO:0005737 cytoplasm; GO:0032991 macromolecular complex; GO:0044424 intracellular part; GO:0005623 cell; GO:0044422 organelle part; GO:0031974 membrane-enclosed lumen; GO:0035370 UBC13-UEV1A complex; GO:0070062 extracellular exosome; GO:0005654 nucleoplasm; GO:1902494 catalytic complex; GO:0070013 intracellular organelle lumen; GO:0005622 …	GO:0061630 ubiquitin protein ligase activity; GO:0019787 ubiquitin-like protein transferase activity; GO:0031625 ubiquitin protein ligase binding; GO:0003824 catalytic activity; GO:0005488 binding; GO:0004842 ubiquitin-protein transferase activity; GO:0005515 protein binding; GO:0061659 ubiquitin-like protein ligase activity; GO:0044389 ubiquitin-like protein ligase binding; GO:0016740 transferas…	K10704	UBE2V; ubiquitin-conjugating enzyme E2 variant	hsa05131 Shigellosis	IPR016135; IPR000608;	Ubiquitin-conjugating enzyme/RWD-like; Ubiquitin-conjugating enzyme E2;
Q14738	121	0.585	Down	1.5816e-07	K	Serine/threonine-protein phosphatase 2A 56 kDa regulatory subunit delta isoform OS=Homo sapiens OX=9606 GN=PPP2R5D PE=1 SV=1	PPP2R5D	1	0.00140172	94.692	EELFIQK(1)LR	2	0.12183	1	1.336	1.341	1.325	0.77	0.784	0.789	nucleus	GO:0050794 regulation of cellular process; GO:0044700 single organism signaling; GO:0044707 single-multicellular organism process; GO:0044267 cellular protein metabolic process; GO:0044699 single-organism process; GO:0050896 response to stimulus; GO:0044237 cellular metabolic process; GO:0006796 phosphate-containing compound metabolic process; GO:0071704 organic substance metabolic process; GO:00…	GO:0043229 intracellular organelle; GO:0005737 cytoplasm; GO:0044446 intracellular organelle part; GO:0032991 macromolecular complex; GO:0008287 protein serine/threonine phosphatase complex; GO:0031981 nuclear lumen; GO:0044424 intracellular part; GO:0005829 cytosol; GO:0005623 cell; GO:1903293 phosphatase complex; GO:0044422 organelle part; GO:0000159 protein phosphatase type 2A complex; GO:0043…	GO:0030234 enzyme regulator activity; GO:0003824 catalytic activity; GO:0042578 phosphoric ester hydrolase activity; GO:0004722 protein serine/threonine phosphatase activity; GO:0016791 phosphatase activity; GO:0019888 protein phosphatase regulator activity; GO:0019208 phosphatase regulator activity; GO:0005488 binding; GO:0016788 hydrolase activity, acting on ester bonds; GO:0005515 protein bind…	K11584	PPP2R5; serine/threonine-protein phosphatase 2A regulatory subunit B'	hsa03015 mRNA surveillance pathway; hsa04071 Sphingolipid signaling pathway; hsa04114 Oocyte meiosis; hsa04151 PI3K-Akt signaling pathway; hsa04152 AMPK signaling pathway; hsa04261 Adrenergic signaling in cardiomyocytes; hsa04728 Dopaminergic synapse; hsa05165 Human papillomavirus infection	IPR016024;	Armadillo-type fold;
Q03154	129	1.551	Up	0.0089411	K	Aminoacylase-1 OS=Homo sapiens OX=9606 GN=ACY1 PE=1 SV=1	ACY1	1	0.0222707	60.682	LK(1)VEGHR	3	0.064875	1	0.786	0.786	0.693	1.171	1.171	1.172	cytoplasm	GO:0071466 cellular response to xenobiotic stimulus; GO:0051716 cellular response to stimulus; GO:0044281 small molecule metabolic process; GO:0044763 single-organism cellular process; GO:0006807 nitrogen compound metabolic process; GO:0044699 single-organism process; GO:0050896 response to stimulus; GO:0044238 primary metabolic process; GO:0044237 cellular metabolic process; GO:0071704 organic s…	GO:0070062 extracellular exosome; GO:0043226 organelle; GO:0044421 extracellular region part; GO:0044464 cell part; GO:0005622 intracellular; GO:0005737 cytoplasm; GO:0031982 vesicle; GO:1903561 extracellular vesicle; GO:0044424 intracellular part; GO:0005829 cytosol; GO:0005623 cell; GO:0043227 membrane-bounded organelle; GO:0005576 extracellular region; GO:0043230 extracellular organelle; GO:00…	GO:0008233 peptidase activity; GO:0042802 identical protein binding; GO:0003824 catalytic activity; GO:0005488 binding; GO:0043167 ion binding; GO:0070011 peptidase activity, acting on L-amino acid peptides; GO:0043169 cation binding; GO:0046872 metal ion binding; GO:0008237 metallopeptidase activity; GO:0005515 protein binding; GO:0016787 hydrolase activity; GO:0004046 aminoacylase activity; GO:…	K14677	ACY1; aminoacylase [EC:3.5.1.14]	hsa00220 Arginine biosynthesis; hsa01100 Metabolic pathways; hsa01210 2-Oxocarboxylic acid metabolism; hsa01230 Biosynthesis of amino acids	IPR011650;	Peptidase M20, dimerisation domain;
O94916	259	7.661	Up	1.5626e-06	K	Nuclear factor of activated T-cells 5 OS=Homo sapiens OX=9606 GN=NFAT5 PE=1 SV=1	NFAT5	1	0.038802	41.695	AGNGTLENQK(1)GTGVK(1)K	3	2.9694	1	0.192	0.214	0.198	1.463	1.681	1.483	nucleus	GO:0044700 single organism signaling; GO:0097659 nucleic acid-templated transcription; GO:0023051 regulation of signaling; GO:0009891 positive regulation of biosynthetic process; GO:0044699 single-organism process; GO:0009058 biosynthetic process; GO:0044237 cellular metabolic process; GO:2001141 regulation of RNA biosynthetic process; GO:0008152 metabolic process; GO:0007165 signal transduction;…	GO:0043229 intracellular organelle; GO:0044446 intracellular organelle part; GO:0005737 cytoplasm; GO:0031981 nuclear lumen; GO:0044424 intracellular part; GO:0005623 cell; GO:0005829 cytosol; GO:0044422 organelle part; GO:0043231 intracellular membrane-bounded organelle; GO:0043226 organelle; GO:0031974 membrane-enclosed lumen; GO:0005654 nucleoplasm; GO:0005634 nucleus; GO:0070013 intracellular…	GO:0000981 RNA polymerase II transcription factor activity, sequence-specific DNA binding; GO:0001228 transcriptional activator activity, RNA polymerase II transcription regulatory region sequence-specific binding; GO:0003677 DNA binding; GO:0000976 transcription regulatory region sequence-specific DNA binding; GO:0001077 transcriptional activator activity, RNA polymerase II core promoter proxima…	K17335	NFAT5; nuclear factor of activated T-cells 5		IPR013783; IPR014756; IPR008967; IPR032397; IPR011539; IPR002909;	Immunoglobulin-like fold; Immunoglobulin E-set; p53-like transcription factor, DNA-binding; Rel homology dimerisation domain; Rel homology domain (RHD), DNA-binding domain; IPT domain;
O94916	264	7.661	Up	1.5626e-06	K	Nuclear factor of activated T-cells 5 OS=Homo sapiens OX=9606 GN=NFAT5 PE=1 SV=1	NFAT5	1	0.038802	41.695	AGNGTLENQK(1)GTGVK(1)K	3	2.9694	1	0.192	0.214	0.198	1.463	1.681	1.483	nucleus	GO:0044700 single organism signaling; GO:0097659 nucleic acid-templated transcription; GO:0023051 regulation of signaling; GO:0009891 positive regulation of biosynthetic process; GO:0044699 single-organism process; GO:0009058 biosynthetic process; GO:0044237 cellular metabolic process; GO:2001141 regulation of RNA biosynthetic process; GO:0008152 metabolic process; GO:0007165 signal transduction;…	GO:0043229 intracellular organelle; GO:0044446 intracellular organelle part; GO:0005737 cytoplasm; GO:0031981 nuclear lumen; GO:0044424 intracellular part; GO:0005623 cell; GO:0005829 cytosol; GO:0044422 organelle part; GO:0043231 intracellular membrane-bounded organelle; GO:0043226 organelle; GO:0031974 membrane-enclosed lumen; GO:0005654 nucleoplasm; GO:0005634 nucleus; GO:0070013 intracellular…	GO:0000981 RNA polymerase II transcription factor activity, sequence-specific DNA binding; GO:0001228 transcriptional activator activity, RNA polymerase II transcription regulatory region sequence-specific binding; GO:0003677 DNA binding; GO:0000976 transcription regulatory region sequence-specific DNA binding; GO:0001077 transcriptional activator activity, RNA polymerase II core promoter proxima…	K17335	NFAT5; nuclear factor of activated T-cells 5		IPR013783; IPR014756; IPR008967; IPR032397; IPR011539; IPR002909;	Immunoglobulin-like fold; Immunoglobulin E-set; p53-like transcription factor, DNA-binding; Rel homology dimerisation domain; Rel homology domain (RHD), DNA-binding domain; IPT domain;
P83111	266	1.614	Up	0.0147762	K	Serine beta-lactamase-like protein LACTB, mitochondrial OS=Homo sapiens OX=9606 GN=LACTB PE=1 SV=2	LACTB	1	0.00175241	85.554	FK(1)TEQENEAK	2	0.41908	1	0.728	0.738	0.732	1.056	1.204	1.288	cytoplasm		GO:0043226 organelle; GO:0043231 intracellular membrane-bounded organelle; GO:0043229 intracellular organelle; GO:0044464 cell part; GO:0005622 intracellular; GO:0005737 cytoplasm; GO:0044424 intracellular part; GO:0043227 membrane-bounded organelle; GO:0005829 cytosol; GO:0005623 cell; GO:0005739 mitochondrion; GO:0044444 cytoplasmic part;	GO:0016787 hydrolase activity; GO:0003824 catalytic activity;	K17382	LACTB; serine beta-lactamase-like protein LACTB, mitochondrial		IPR012338; IPR001466;	Beta-lactamase/transpeptidase-like; Beta-lactamase-related;
Q92520	188	0.645	Down	0.020121	K	Protein FAM3C OS=Homo sapiens OX=9606 GN=FAM3C PE=1 SV=1	FAM3C	1	0.0188968	43.761	DNWVFCGGK(1)GIK	3	-0.0121	1	1.353	1.217	1.254	0.713	1.023	0.73	extracellular	GO:0032502 developmental process; GO:0044707 single-multicellular organism process; GO:0016192 vesicle-mediated transport; GO:0044763 single-organism cellular process; GO:0044699 single-organism process; GO:0002576 platelet degranulation; GO:0032501 multicellular organismal process; GO:0051234 establishment of localization; GO:0006810 transport; GO:0045055 regulated exocytosis; GO:1902578 single-…	GO:0034774 secretory granule lumen; GO:0042827 platelet dense granule; GO:0005615 extracellular space; GO:0044421 extracellular region part; GO:0031410 cytoplasmic vesicle; GO:0005737 cytoplasm; GO:0031982 vesicle; GO:0044433 cytoplasmic vesicle part; GO:0044424 intracellular part; GO:0005623 cell; GO:0044422 organelle part; GO:0031974 membrane-enclosed lumen; GO:0070062 extracellular exosome; GO…	GO:0005125 cytokine activity; GO:0005515 protein binding; GO:0005102 receptor binding; GO:0005488 binding;
P02749	303	21.341	Up	4.0011e-06	K	Beta-2-glycoprotein 1 OS=Homo sapiens OX=9606 GN=APOH PE=1 SV=3	APOH	1	7.12912e-09	145.31	VSFFCK(1)NK(1)EK	2	-0.45882	1	0.064	0.074	0.091	1.696	1.57	1.621	extracellular	GO:0065008 regulation of biological quality; GO:0007596 blood coagulation; GO:0010941 regulation of cell death; GO:0044255 cellular lipid metabolic process; GO:0044237 cellular metabolic process; GO:0010594 regulation of endothelial cell migration; GO:0008285 negative regulation of cell proliferation; GO:0034391 regulation of smooth muscle cell apoptotic process; GO:0008152 metabolic process; GO:…	GO:0034774 secretory granule lumen; GO:0042827 platelet dense granule; GO:0005615 extracellular space; GO:0044421 extracellular region part; GO:0031410 cytoplasmic vesicle; GO:0005737 cytoplasm; GO:0031982 vesicle; GO:0034358 plasma lipoprotein particle; GO:0044433 cytoplasmic vesicle part; GO:0034385 triglyceride-rich plasma lipoprotein particle; GO:0032991 macromolecular complex; GO:0044424 int…	GO:0043167 ion binding; GO:0005515 protein binding; GO:0098772 molecular function regulator; GO:0008201 heparin binding; GO:1901681 sulfur compound binding; GO:0097367 carbohydrate derivative binding; GO:0042802 identical protein binding; GO:0030234 enzyme regulator activity; GO:0005488 binding; GO:0005543 phospholipid binding; GO:0008289 lipid binding; GO:0060229 lipase activator activity; GO:00…	K17305	APOH, B2G1; beta-2-glycoprotein 1	hsa04979 Cholesterol metabolism	IPR000436; IPR015104;	Sushi/SCR/CCP domain; Beta-2-glycoprotein-1 fifth domain;
P02749	301	6.988	Up	4.3035e-08	K	Beta-2-glycoprotein 1 OS=Homo sapiens OX=9606 GN=APOH PE=1 SV=3	APOH	1	7.12912e-09	145.31	VSFFCK(1)NK(1)EK	2	-0.45882	7	0.214	0.222	0.222	1.585	1.496	1.517	extracellular	GO:0065008 regulation of biological quality; GO:0007596 blood coagulation; GO:0010941 regulation of cell death; GO:0044255 cellular lipid metabolic process; GO:0044237 cellular metabolic process; GO:0010594 regulation of endothelial cell migration; GO:0008285 negative regulation of cell proliferation; GO:0034391 regulation of smooth muscle cell apoptotic process; GO:0008152 metabolic process; GO:…	GO:0034774 secretory granule lumen; GO:0042827 platelet dense granule; GO:0005615 extracellular space; GO:0044421 extracellular region part; GO:0031410 cytoplasmic vesicle; GO:0005737 cytoplasm; GO:0031982 vesicle; GO:0034358 plasma lipoprotein particle; GO:0044433 cytoplasmic vesicle part; GO:0034385 triglyceride-rich plasma lipoprotein particle; GO:0032991 macromolecular complex; GO:0044424 int…	GO:0043167 ion binding; GO:0005515 protein binding; GO:0098772 molecular function regulator; GO:0008201 heparin binding; GO:1901681 sulfur compound binding; GO:0097367 carbohydrate derivative binding; GO:0042802 identical protein binding; GO:0030234 enzyme regulator activity; GO:0005488 binding; GO:0005543 phospholipid binding; GO:0008289 lipid binding; GO:0060229 lipase activator activity; GO:00…	K17305	APOH, B2G1; beta-2-glycoprotein 1	hsa04979 Cholesterol metabolism	IPR000436; IPR015104;	Sushi/SCR/CCP domain; Beta-2-glycoprotein-1 fifth domain;
O43399	78	0.639	Down	0.00100127	K	Tumor protein D54 OS=Homo sapiens OX=9606 GN=TPD52L2 PE=1 SV=2	TPD52L2	1	4.08789e-14	169.37	HCGELK(1)R	3	0.063369	2	1.368	1.285	1.19	0.862	0.77	0.824	cytoplasm,nucleus	GO:0050794 regulation of cellular process; GO:0050789 regulation of biological process; GO:0042127 regulation of cell proliferation; GO:0065007 biological regulation;	GO:0044464 cell part; GO:0005622 intracellular; GO:0005737 cytoplasm; GO:0048471 perinuclear region of cytoplasm; GO:0044424 intracellular part; GO:0005623 cell; GO:0044444 cytoplasmic part;	GO:0097159 organic cyclic compound binding; GO:1901363 heterocyclic compound binding; GO:0003723 RNA binding; GO:0042802 identical protein binding; GO:0046982 protein heterodimerization activity; GO:0042803 protein homodimerization activity; GO:0005488 binding; GO:0046983 protein dimerization activity; GO:0003676 nucleic acid binding; GO:0005515 protein binding;
P60903	57	0.515	Down	9.78e-09	K	Protein S100-A10 OS=Homo sapiens OX=9606 GN=S100A10 PE=1 SV=2	S100A10	1	0.00160735	88.948	IMK(1)DLDQCR	3	0.049713	3	1.423	1.413	1.404	0.732	0.724	0.728	cytoplasm	GO:0044085 cellular component biogenesis; GO:0010256 endomembrane system organization; GO:1903391 regulation of adherens junction organization; GO:0090109 regulation of cell-substrate junction assembly; GO:0044699 single-organism process; GO:0090002 establishment of protein localization to plasma membrane; GO:0051234 establishment of localization; GO:0051130 positive regulation of cellular compon…	GO:0016020 membrane; GO:0043229 intracellular organelle; GO:0044421 extracellular region part; GO:0005783 endoplasmic reticulum; GO:0019898 extrinsic component of membrane; GO:0071944 cell periphery; GO:0031982 vesicle; GO:0005737 cytoplasm; GO:0019897 extrinsic component of plasma membrane; GO:0012505 endomembrane system; GO:0044424 intracellular part; GO:0005623 cell; GO:0005576 extracellular r…	GO:0042802 identical protein binding; GO:0042803 protein homodimerization activity; GO:0005488 binding; GO:0043167 ion binding; GO:0046983 protein dimerization activity; GO:0043169 cation binding; GO:0044325 ion channel binding; GO:0046872 metal ion binding; GO:0005515 protein binding; GO:0005509 calcium ion binding;	K17274	S100A10; calpactin-1 light chain		IPR011992; IPR013787;	EF-hand domain pair; S100/CaBP-9k-type, calcium binding, subdomain;
Q13951	28	0.33	Down	6.6881e-07	K	Core-binding factor subunit beta OS=Homo sapiens OX=9606 GN=CBFB PE=1 SV=2	CBFB	1	0.00707431	75.819	ECEIK(1)YTGFR	2	2.5877	1	1.681	1.698	1.646	0.577	0.543	0.537	nucleus	GO:0001649 osteoblast differentiation; GO:0021700 developmental maturation; GO:0045321 leukocyte activation; GO:0097659 nucleic acid-templated transcription; GO:0048869 cellular developmental process; GO:0009891 positive regulation of biosynthetic process; GO:0044699 single-organism process; GO:0009058 biosynthetic process; GO:0044237 cellular metabolic process; GO:2001141 regulation of RNA biosy…	GO:0043226 organelle; GO:0043231 intracellular membrane-bounded organelle; GO:0043229 intracellular organelle; GO:0016020 membrane; GO:0005634 nucleus; GO:0044464 cell part; GO:0005622 intracellular; GO:0044424 intracellular part; GO:0043227 membrane-bounded organelle; GO:0005623 cell;	GO:0097159 organic cyclic compound binding; GO:1901363 heterocyclic compound binding; GO:0003677 DNA binding; GO:0005488 binding; GO:0001071 nucleic acid binding transcription factor activity; GO:0003676 nucleic acid binding; GO:0000989 transcription factor activity, transcription factor binding; GO:0003713 transcription coactivator activity; GO:0005515 protein binding; GO:0003712 transcription c…
Q9P2R7	88	0.517	Down	0.0002586	K	Succinate--CoA ligase [ADP-forming] subunit beta, mitochondrial OS=Homo sapiens OX=9606 GN=SUCLA2 PE=1 SV=3	SUCLA2	1	0.000813241	90.434	SPDEAYAIAK(1)K	2	0.66219	1	1.34	1.43	1.461	0.742	0.781	0.665	mitochondria	GO:0051188 cofactor biosynthetic process; GO:0043648 dicarboxylic acid metabolic process; GO:0006725 cellular aromatic compound metabolic process; GO:0016053 organic acid biosynthetic process; GO:0044699 single-organism process; GO:0009058 biosynthetic process; GO:1901566 organonitrogen compound biosynthetic process; GO:0046502 uroporphyrinogen III metabolic process; GO:0044237 cellular metabolic…	GO:0005759 mitochondrial matrix; GO:0043229 intracellular organelle; GO:0044421 extracellular region part; GO:0044429 mitochondrial part; GO:0031982 vesicle; GO:0005737 cytoplasm; GO:0044446 intracellular organelle part; GO:0044424 intracellular part; GO:0005623 cell; GO:0005576 extracellular region; GO:0005739 mitochondrion; GO:0044422 organelle part; GO:0070062 extracellular exosome; GO:0031974…	GO:0005524 ATP binding; GO:1901265 nucleoside phosphate binding; GO:0016405 CoA-ligase activity; GO:0016874 ligase activity; GO:0001882 nucleoside binding; GO:0043167 ion binding; GO:0016877 ligase activity, forming carbon-sulfur bonds; GO:0005515 protein binding; GO:0000166 nucleotide binding; GO:0004775 succinate-CoA ligase (ADP-forming) activity; GO:0097159 organic cyclic compound binding; GO:…	K01900	LSC2; succinyl-CoA synthetase beta subunit [EC:6.2.1.4 6.2.1.5]	hsa00020 Citrate cycle (TCA cycle); hsa00640 Propanoate metabolism; hsa01100 Metabolic pathways; hsa01200 Carbon metabolism	IPR005811; IPR011761; IPR013816; IPR013650; IPR013815; IPR016102;	ATP-citrate lyase/succinyl-CoA ligase; ATP-grasp fold; ATP-grasp fold, subdomain 2; ATP-grasp fold, succinyl-CoA synthetase-type; ATP-grasp fold, subdomain 1; Succinyl-CoA synthetase-like;
Q9P2R7	108	0.665	Down	3.8622e-05	K	Succinate--CoA ligase [ADP-forming] subunit beta, mitochondrial OS=Homo sapiens OX=9606 GN=SUCLA2 PE=1 SV=3	SUCLA2	1	0.00296572	80.69	GK(1)GTFESGLK	2	0.88315	1	1.253	1.247	1.263	0.823	0.868	0.813	mitochondria	GO:0051188 cofactor biosynthetic process; GO:0043648 dicarboxylic acid metabolic process; GO:0006725 cellular aromatic compound metabolic process; GO:0016053 organic acid biosynthetic process; GO:0044699 single-organism process; GO:0009058 biosynthetic process; GO:1901566 organonitrogen compound biosynthetic process; GO:0046502 uroporphyrinogen III metabolic process; GO:0044237 cellular metabolic…	GO:0005759 mitochondrial matrix; GO:0043229 intracellular organelle; GO:0044421 extracellular region part; GO:0044429 mitochondrial part; GO:0031982 vesicle; GO:0005737 cytoplasm; GO:0044446 intracellular organelle part; GO:0044424 intracellular part; GO:0005623 cell; GO:0005576 extracellular region; GO:0005739 mitochondrion; GO:0044422 organelle part; GO:0070062 extracellular exosome; GO:0031974…	GO:0005524 ATP binding; GO:1901265 nucleoside phosphate binding; GO:0016405 CoA-ligase activity; GO:0016874 ligase activity; GO:0001882 nucleoside binding; GO:0043167 ion binding; GO:0016877 ligase activity, forming carbon-sulfur bonds; GO:0005515 protein binding; GO:0000166 nucleotide binding; GO:0004775 succinate-CoA ligase (ADP-forming) activity; GO:0097159 organic cyclic compound binding; GO:…	K01900	LSC2; succinyl-CoA synthetase beta subunit [EC:6.2.1.4 6.2.1.5]	hsa00020 Citrate cycle (TCA cycle); hsa00640 Propanoate metabolism; hsa01100 Metabolic pathways; hsa01200 Carbon metabolism	IPR005811; IPR011761; IPR013816; IPR013650; IPR013815; IPR016102;	ATP-citrate lyase/succinyl-CoA ligase; ATP-grasp fold; ATP-grasp fold, subdomain 2; ATP-grasp fold, succinyl-CoA synthetase-type; ATP-grasp fold, subdomain 1; Succinyl-CoA synthetase-like;
Q96FW1	84	0.632	Down	0.00047901	K	Ubiquitin thioesterase OTUB1 OS=Homo sapiens OX=9606 GN=OTUB1 PE=1 SV=2	OTUB1	1	0.000908833	79.697	K(1)TRPDGNCFYR	3	0.13296	1	1.268	1.282	1.313	0.885	0.776	0.78	cytoplasm	GO:0070646 protein modification by small protein removal; GO:0051129 negative regulation of cellular component organization; GO:0070555 response to interleukin-1; GO:0071345 cellular response to cytokine stimulus; GO:0044237 cellular metabolic process; GO:0031400 negative regulation of protein modification process; GO:0006282 regulation of DNA repair; GO:0031396 regulation of protein ubiquitinati…	GO:0043229 intracellular organelle; GO:0044421 extracellular region part; GO:0044446 intracellular organelle part; GO:0031982 vesicle; GO:0005737 cytoplasm; GO:0031981 nuclear lumen; GO:0044424 intracellular part; GO:0005623 cell; GO:0005829 cytosol; GO:0005576 extracellular region; GO:0044422 organelle part; GO:0031974 membrane-enclosed lumen; GO:0043231 intracellular membrane-bounded organelle;…	GO:0004843 thiol-dependent ubiquitin-specific protease activity; GO:0008233 peptidase activity; GO:0031625 ubiquitin protein ligase binding; GO:0019783 ubiquitin-like protein-specific protease activity; GO:0005515 protein binding; GO:0008234 cysteine-type peptidase activity; GO:0016787 hydrolase activity; GO:0032182 ubiquitin-like protein binding; GO:0019784 NEDD8-specific protease activity; GO:0…	K09602	OTUB1; ubiquitin thioesterase protein OTUB1 [EC:3.4.19.12]		IPR003323;	OTU domain;
P18124	223	1.556	Up	0.00049647	K	60S ribosomal protein L7 OS=Homo sapiens OX=9606 GN=RPL7 PE=1 SV=1	RPL7	1	2.59475e-29	179.94	K(1)TTHFVEGGDAGNREDQINR	3	-0.098351	4	0.789	0.778	0.693	1.183	1.144	1.19	cytoplasm	GO:0044085 cellular component biogenesis; GO:0022613 ribonucleoprotein complex biogenesis; GO:0072594 establishment of protein localization to organelle; GO:0006518 peptide metabolic process; GO:0009058 biosynthetic process; GO:0044764 multi-organism cellular process; GO:0044237 cellular metabolic process; GO:0015031 protein transport; GO:0042273 ribosomal large subunit biogenesis; GO:0051234 est…	GO:0016020 membrane; GO:0044421 extracellular region part; GO:0030054 cell junction; GO:0031982 vesicle; GO:0005737 cytoplasm; GO:0032991 macromolecular complex; GO:0044424 intracellular part; GO:0005623 cell; GO:0044422 organelle part; GO:0043228 non-membrane-bounded organelle; GO:0070062 extracellular exosome; GO:0031974 membrane-enclosed lumen; GO:0005925 focal adhesion; GO:0070013 intracellul…	GO:0097159 organic cyclic compound binding; GO:1901363 heterocyclic compound binding; GO:0003729 mRNA binding; GO:0003677 DNA binding; GO:0003723 RNA binding; GO:0042802 identical protein binding; GO:0042803 protein homodimerization activity; GO:0005488 binding; GO:0046983 protein dimerization activity; GO:0003676 nucleic acid binding; GO:0005515 protein binding; GO:0005198 structural molecule ac…	K02937	RP-L7e, RPL7; large subunit ribosomal protein L7e	hsa03010 Ribosome	IPR012988; IPR016082;	Ribosomal protein L30, N-terminal; Ribosomal protein L30, ferredoxin-like fold domain;
Q9Y2X3	444	0.551	Down	0.000139718	K	Nucleolar protein 58 OS=Homo sapiens OX=9606 GN=NOP58 PE=1 SV=1	NOP58	0.999998	1.52763e-05	100.13	K(1)IEQVDKEDEITEK	3	-0.10353	1	1.403	1.352	1.361	0.724	0.818	0.726	cytoplasm	GO:0050658 RNA transport; GO:0044085 cellular component biogenesis; GO:0022613 ribonucleoprotein complex biogenesis; GO:0072594 establishment of protein localization to organelle; GO:0017038 protein import; GO:0044699 single-organism process; GO:0051169 nuclear transport; GO:0044237 cellular metabolic process; GO:0009451 RNA modification; GO:0015031 protein transport; GO:0051234 establishment of …	GO:0016020 membrane; GO:0005737 cytoplasm; GO:0032991 macromolecular complex; GO:0044424 intracellular part; GO:0016604 nuclear body; GO:0005623 cell; GO:0015030 Cajal body; GO:0044422 organelle part; GO:0030684 preribosome; GO:0043228 non-membrane-bounded organelle; GO:0031974 membrane-enclosed lumen; GO:0005654 nucleoplasm; GO:0070013 intracellular organelle lumen; GO:0044464 cell part; GO:0005…	GO:0030515 snoRNA binding; GO:0097159 organic cyclic compound binding; GO:1901363 heterocyclic compound binding; GO:0003723 RNA binding; GO:0001099 basal RNA polymerase II transcription machinery binding; GO:0001098 basal transcription machinery binding; GO:0051117 ATPase binding; GO:0001085 RNA polymerase II transcription factor binding; GO:0005488 binding; GO:0003676 nucleic acid binding; GO:00…	K14565	NOP58; nucleolar protein 58	hsa03008 Ribosome biogenesis in eukaryotes	IPR002687; IPR012974; IPR012976;	Nop domain; NOP5, N-terminal; NOSIC;
P18077	45	0.662	Down	0.00014131	K	60S ribosomal protein L35a OS=Homo sapiens OX=9606 GN=RPL35A PE=1 SV=2	RPL35A	1	0.000343614	104.82	DETEFYLGK(1)R	2	0.67148	1	1.314	1.267	1.195	0.841	0.839	0.818	cytoplasm	GO:0044085 cellular component biogenesis; GO:0022613 ribonucleoprotein complex biogenesis; GO:0072594 establishment of protein localization to organelle; GO:0006518 peptide metabolic process; GO:0009058 biosynthetic process; GO:0044764 multi-organism cellular process; GO:0044237 cellular metabolic process; GO:0015031 protein transport; GO:0042273 ribosomal large subunit biogenesis; GO:0051234 est…	GO:0016020 membrane; GO:0044421 extracellular region part; GO:0031982 vesicle; GO:0005737 cytoplasm; GO:0032991 macromolecular complex; GO:0044424 intracellular part; GO:0005623 cell; GO:0044422 organelle part; GO:0043228 non-membrane-bounded organelle; GO:0070062 extracellular exosome; GO:0044391 ribosomal subunit; GO:0005622 intracellular; GO:0044464 cell part; GO:1903561 extracellular vesicle;…	GO:0097159 organic cyclic compound binding; GO:1901363 heterocyclic compound binding; GO:0003723 RNA binding; GO:0000049 tRNA binding; GO:0005488 binding; GO:0003676 nucleic acid binding; GO:0005515 protein binding; GO:0005198 structural molecule activity; GO:0003735 structural constituent of ribosome;	K02917	RP-L35Ae, RPL35A; large subunit ribosomal protein L35Ae	hsa03010 Ribosome	IPR009000;	Translation protein, beta-barrel domain;
P18564	548	1.991	Up	0.0032991	K	Integrin beta-6 OS=Homo sapiens OX=9606 GN=ITGB6 PE=1 SV=2	ITGB6	1	9.92231e-07	77.037	HK(1)GLLCGGNGDCDCGECVCR	3	-0.47256	1	0.5	0.688	0.699	1.2	1.299	1.258	extracellular	GO:0044409 entry into host; GO:0050794 regulation of cellular process; GO:0044700 single organism signaling; GO:0016043 cellular component organization; GO:0007166 cell surface receptor signaling pathway; GO:0033627 cell adhesion mediated by integrin; GO:0051806 entry into cell of other organism involved in symbiotic interaction; GO:0019058 viral life cycle; GO:0044699 single-organism process; GO…	GO:0016020 membrane; GO:0044421 extracellular region part; GO:0098636 protein complex involved in cell adhesion; GO:0009897 external side of plasma membrane; GO:0098796 membrane protein complex; GO:0030054 cell junction; GO:0071944 cell periphery; GO:0031982 vesicle; GO:0031224 intrinsic component of membrane; GO:0032991 macromolecular complex; GO:0005887 integral component of plasma membrane; GO…	GO:0050839 cell adhesion molecule binding; GO:0060089 molecular transducer activity; GO:0004872 receptor activity; GO:0005102 receptor binding; GO:0005488 binding; GO:0044877 macromolecular complex binding; GO:0005515 protein binding; GO:0005178 integrin binding; GO:0001618 virus receptor activity; GO:0032403 protein complex binding;	K06589	ITGB6; integrin beta 6	hsa04151 PI3K-Akt signaling pathway; hsa04510 Focal adhesion; hsa04512 ECM-receptor interaction; hsa04810 Regulation of actin cytoskeleton; hsa05165 Human papillomavirus infection; hsa05410 Hypertrophic cardiomyopathy (HCM); hsa05412 Arrhythmogenic right ventricular cardiomyopathy (ARVC); hsa05414 Dilated cardiomyopathy (DCM)	IPR033760; IPR002369; IPR016201; IPR012896; IPR032695; IPR013111; IPR002035; IPR014836;	Integrin beta N-terminal; Integrin beta subunit, VWA domain; PSI domain; Integrin beta subunit, tail; Integrin domain; EGF-like domain, extracellular; von Willebrand factor, type A; Integrin beta subunit, cytoplasmic domain;
Q15008	130	1.786	Up	0.0002359	K	26S proteasome non-ATPase regulatory subunit 6 OS=Homo sapiens OX=9606 GN=PSMD6 PE=1 SV=1	PSMD6	1	0.00511348	57.885	TYDK(1)TVALGHR	3	-1.9991	1	0.682	0.722	0.643	1.2	1.162	1.294	cytoplasm	GO:0044700 single organism signaling; GO:0010608 posttranscriptional regulation of gene expression; GO:0051443 positive regulation of ubiquitin-protein transferase activity; GO:0031347 regulation of defense response; GO:0010564 regulation of cell cycle process; GO:0044237 cellular metabolic process; GO:1903364 positive regulation of cellular protein catabolic process; GO:0008152 metabolic process…	GO:0034774 secretory granule lumen; GO:0044421 extracellular region part; GO:0031410 cytoplasmic vesicle; GO:0005838 proteasome regulatory particle; GO:0031982 vesicle; GO:0005737 cytoplasm; GO:0044433 cytoplasmic vesicle part; GO:0032991 macromolecular complex; GO:0044424 intracellular part; GO:0005623 cell; GO:1904813 ficolin-1-rich granule lumen; GO:0044422 organelle part; GO:1905369 endopepti…	GO:0016462 pyrophosphatase activity; GO:0003824 catalytic activity; GO:0005488 binding; GO:0016817 hydrolase activity, acting on acid anhydrides; GO:0005515 protein binding; GO:0016787 hydrolase activity; GO:0016818 hydrolase activity, acting on acid anhydrides, in phosphorus-containing anhydrides; GO:0017111 nucleoside-triphosphatase activity; GO:0016887 ATPase activity;	K03037	PSMD6, RPN7; 26S proteasome regulatory subunit N7	hsa03050 Proteasome; hsa05169 Epstein-Barr virus infection	IPR011991; IPR000717; IPR011990;	Winged helix-turn-helix DNA-binding domain; Proteasome component (PCI) domain; Tetratricopeptide-like helical domain;
Q15008	349	0.366	Down	1.2631e-07	K	26S proteasome non-ATPase regulatory subunit 6 OS=Homo sapiens OX=9606 GN=PSMD6 PE=1 SV=1	PSMD6	1	2.45272e-05	93.226	IDK(1)VNEIVETNRPDSK	4	0.090022	2	1.596	1.624	1.626	0.576	0.6	0.598	cytoplasm	GO:0044700 single organism signaling; GO:0010608 posttranscriptional regulation of gene expression; GO:0051443 positive regulation of ubiquitin-protein transferase activity; GO:0031347 regulation of defense response; GO:0010564 regulation of cell cycle process; GO:0044237 cellular metabolic process; GO:1903364 positive regulation of cellular protein catabolic process; GO:0008152 metabolic process…	GO:0034774 secretory granule lumen; GO:0044421 extracellular region part; GO:0031410 cytoplasmic vesicle; GO:0005838 proteasome regulatory particle; GO:0031982 vesicle; GO:0005737 cytoplasm; GO:0044433 cytoplasmic vesicle part; GO:0032991 macromolecular complex; GO:0044424 intracellular part; GO:0005623 cell; GO:1904813 ficolin-1-rich granule lumen; GO:0044422 organelle part; GO:1905369 endopepti…	GO:0016462 pyrophosphatase activity; GO:0003824 catalytic activity; GO:0005488 binding; GO:0016817 hydrolase activity, acting on acid anhydrides; GO:0005515 protein binding; GO:0016787 hydrolase activity; GO:0016818 hydrolase activity, acting on acid anhydrides, in phosphorus-containing anhydrides; GO:0017111 nucleoside-triphosphatase activity; GO:0016887 ATPase activity;	K03037	PSMD6, RPN7; 26S proteasome regulatory subunit N7	hsa03050 Proteasome; hsa05169 Epstein-Barr virus infection	IPR011991; IPR000717; IPR011990;	Winged helix-turn-helix DNA-binding domain; Proteasome component (PCI) domain; Tetratricopeptide-like helical domain;
P36543	138	0.569	Down	2.1349e-05	K	V-type proton ATPase subunit E 1 OS=Homo sapiens OX=9606 GN=ATP6V1E1 PE=1 SV=1	ATP6V1E1	1	0.01156	85.355	K(1)QDFPLVK	3	0.41354	2	1.333	1.367	1.353	0.748	0.806	0.753	cytoplasm	GO:0044700 single organism signaling; GO:0065008 regulation of biological quality; GO:0008286 insulin receptor signaling pathway; GO:0007166 cell surface receptor signaling pathway; GO:0090662 ATP hydrolysis coupled transmembrane transport; GO:0015988 energy coupled proton transmembrane transport, against electrochemical gradient; GO:0030641 regulation of cellular pH; GO:0030004 cellular monovale…	GO:0016020 membrane; GO:0044421 extracellular region part; GO:0016324 apical plasma membrane; GO:0031410 cytoplasmic vesicle; GO:0031090 organelle membrane; GO:0098796 membrane protein complex; GO:0071944 cell periphery; GO:0031982 vesicle; GO:0005737 cytoplasm; GO:0032991 macromolecular complex; GO:0044424 intracellular part; GO:0098858 actin-based cell projection; GO:0005623 cell; GO:0044422 or…	GO:0042625 ATPase coupled ion transmembrane transporter activity; GO:0015399 primary active transmembrane transporter activity; GO:0022892 substrate-specific transporter activity; GO:0016817 hydrolase activity, acting on acid anhydrides; GO:0044769 ATPase activity, coupled to transmembrane movement of ions, rotational mechanism; GO:0015077 monovalent inorganic cation transmembrane transporter act…	K02150	ATPeV1E, ATP6E; V-type H+-transporting ATPase subunit E	hsa00190 Oxidative phosphorylation; hsa01100 Metabolic pathways; hsa04145 Phagosome; hsa04150 mTOR signaling pathway; hsa04721 Synaptic vesicle cycle; hsa04966 Collecting duct acid secretion; hsa05110 Vibrio cholerae infection; hsa05120 Epithelial cell signaling in Helicobacter pylori infection; hsa05165 Human papillomavirus infection; hsa05323 Rheumatoid arthritis
P50851	2742	0.435	Down	7.5371e-05	K	Lipopolysaccharide-responsive and beige-like anchor protein OS=Homo sapiens OX=9606 GN=LRBA PE=1 SV=4	LRBA	1	0.00017262	97.463	TLEGPENCLK(1)PK	2	-0.45811	1	1.558	1.448	1.539	0.606	0.665	0.704	plasma membrane		GO:0043229 intracellular organelle; GO:0016020 membrane; GO:0005783 endoplasmic reticulum; GO:0071944 cell periphery; GO:0005737 cytoplasm; GO:0031224 intrinsic component of membrane; GO:0012505 endomembrane system; GO:0044424 intracellular part; GO:0005623 cell; GO:0016021 integral component of membrane; GO:0005886 plasma membrane; GO:0043231 intracellular membrane-bounded organelle; GO:0043226 …	GO:0005515 protein binding; GO:0005488 binding;				IPR000409; IPR011989; IPR013320; IPR031570; IPR017986; IPR011993; IPR015943; IPR016024; IPR023362; IPR010508;	BEACH domain; Armadillo-like helical; Concanavalin A-like lectin/glucanase domain; Domain of unknown function DUF4704; WD40-repeat-containing domain; PH domain-like; WD40/YVTN repeat-like-containing domain; Armadillo-type fold; PH-BEACH domain; Domain of unknown function DUF1088;
Q16204	81	0.338	Down	4.3748e-06	K	Coiled-coil domain-containing protein 6 OS=Homo sapiens OX=9606 GN=CCDC6 PE=1 SV=2	CCDC6	1	0.00126388	110.39	IELETYK(1)LK	3	0.58578	2	1.704	1.576	1.702	0.556	0.538	0.591	nucleus	GO:0016043 cellular component organization; GO:0007010 cytoskeleton organization; GO:0009987 cellular process; GO:0006996 organelle organization; GO:0071840 cellular component organization or biogenesis;	GO:0005856 cytoskeleton; GO:0043226 organelle; GO:0043229 intracellular organelle; GO:0043232 intracellular non-membrane-bounded organelle; GO:0044464 cell part; GO:0005622 intracellular; GO:0005737 cytoplasm; GO:0044424 intracellular part; GO:0005829 cytosol; GO:0005623 cell; GO:0044444 cytoplasmic part; GO:0043228 non-membrane-bounded organelle;	GO:0019904 protein domain specific binding; GO:0005515 protein binding; GO:0017124 SH3 domain binding; GO:0005200 structural constituent of cytoskeleton; GO:0005198 structural molecule activity; GO:0005488 binding;	K09288	CCDC6, PTC; coiled-coil domain-containing protein 6	hsa05200 Pathways in cancer; hsa05216 Thyroid cancer
Q8TEQ6	860	0.481	Down	0.00165687	K	Gem-associated protein 5 OS=Homo sapiens OX=9606 GN=GEMIN5 PE=1 SV=3	GEMIN5	1	1.41616e-06	104.88	SK(1)EELHQDCLVLATAK	3	-0.75026	1	1.465	1.457	1.445	0.692	0.739	0.668	nucleus	GO:0044085 cellular component biogenesis; GO:0022613 ribonucleoprotein complex biogenesis; GO:0006518 peptide metabolic process; GO:0022618 ribonucleoprotein complex assembly; GO:0010608 posttranscriptional regulation of gene expression; GO:0009058 biosynthetic process; GO:0051169 nuclear transport; GO:0044237 cellular metabolic process; GO:0051234 establishment of localization; GO:0008152 metabo…	GO:0043229 intracellular organelle; GO:0016020 membrane; GO:0032797 SMN complex; GO:0044446 intracellular organelle part; GO:0005737 cytoplasm; GO:0031981 nuclear lumen; GO:0032991 macromolecular complex; GO:0044424 intracellular part; GO:0005829 cytosol; GO:0016604 nuclear body; GO:0005623 cell; GO:0044422 organelle part; GO:0043231 intracellular membrane-bounded organelle; GO:0043226 organelle;…	GO:0003723 RNA binding; GO:0000339 RNA cap binding; GO:0000340 RNA 7-methylguanosine cap binding; GO:0003730 mRNA 3'-UTR binding; GO:0044877 macromolecular complex binding; GO:0005515 protein binding; GO:0030619 U1 snRNA binding; GO:1901363 heterocyclic compound binding; GO:0097159 organic cyclic compound binding; GO:0043022 ribosome binding; GO:0003729 mRNA binding; GO:0030622 U4atac snRNA bindi…	K13133	GEMIN5; gem associated protein 5	hsa03013 RNA transport	IPR017986; IPR015943; IPR024977; IPR011047;	WD40-repeat-containing domain; WD40/YVTN repeat-like-containing domain; Anaphase-promoting complex subunit 4, WD40 domain; Quinoprotein alcohol dehydrogenase-like superfamily;
Q8TEQ6	1390	0.329	Down	3.6375e-06	K	Gem-associated protein 5 OS=Homo sapiens OX=9606 GN=GEMIN5 PE=1 SV=3	GEMIN5	1	0.000373398	101.65	QHQK(1)SQLCK	3	-1.7575	1	1.637	1.637	1.75	0.557	0.576	0.521	nucleus	GO:0044085 cellular component biogenesis; GO:0022613 ribonucleoprotein complex biogenesis; GO:0006518 peptide metabolic process; GO:0022618 ribonucleoprotein complex assembly; GO:0010608 posttranscriptional regulation of gene expression; GO:0009058 biosynthetic process; GO:0051169 nuclear transport; GO:0044237 cellular metabolic process; GO:0051234 establishment of localization; GO:0008152 metabo…	GO:0043229 intracellular organelle; GO:0016020 membrane; GO:0032797 SMN complex; GO:0044446 intracellular organelle part; GO:0005737 cytoplasm; GO:0031981 nuclear lumen; GO:0032991 macromolecular complex; GO:0044424 intracellular part; GO:0005829 cytosol; GO:0016604 nuclear body; GO:0005623 cell; GO:0044422 organelle part; GO:0043231 intracellular membrane-bounded organelle; GO:0043226 organelle;…	GO:0003723 RNA binding; GO:0000339 RNA cap binding; GO:0000340 RNA 7-methylguanosine cap binding; GO:0003730 mRNA 3'-UTR binding; GO:0044877 macromolecular complex binding; GO:0005515 protein binding; GO:0030619 U1 snRNA binding; GO:1901363 heterocyclic compound binding; GO:0097159 organic cyclic compound binding; GO:0043022 ribosome binding; GO:0003729 mRNA binding; GO:0030622 U4atac snRNA bindi…	K13133	GEMIN5; gem associated protein 5	hsa03013 RNA transport	IPR017986; IPR015943; IPR024977; IPR011047;	WD40-repeat-containing domain; WD40/YVTN repeat-like-containing domain; Anaphase-promoting complex subunit 4, WD40 domain; Quinoprotein alcohol dehydrogenase-like superfamily;
Q96NC0	55	1.581	Up	0.0039606	K	Zinc finger matrin-type protein 2 OS=Homo sapiens OX=9606 GN=ZMAT2 PE=1 SV=1	ZMAT2	1	0.00903316	77.062	DYK(1)VDLESK	2	1.2036	1	0.711	0.841	0.682	1.157	1.275	1.101	nucleus	GO:0006396 RNA processing; GO:0006725 cellular aromatic compound metabolic process; GO:1901360 organic cyclic compound metabolic process; GO:0006807 nitrogen compound metabolic process; GO:0044238 primary metabolic process; GO:0044237 cellular metabolic process; GO:0071704 organic substance metabolic process; GO:0006397 mRNA processing; GO:0016070 RNA metabolic process; GO:0000398 mRNA splicing, …	GO:0043229 intracellular organelle; GO:0044446 intracellular organelle part; GO:0046540 U4/U6 x U5 tri-snRNP complex; GO:0032991 macromolecular complex; GO:0044424 intracellular part; GO:0005623 cell; GO:0044422 organelle part; GO:0097525 spliceosomal snRNP complex; GO:0043231 intracellular membrane-bounded organelle; GO:0043226 organelle; GO:0097526 spliceosomal tri-snRNP complex; GO:0005634 nuc…	GO:0097159 organic cyclic compound binding; GO:1901363 heterocyclic compound binding; GO:0003677 DNA binding; GO:0003723 RNA binding; GO:0046914 transition metal ion binding; GO:0005488 binding; GO:0043167 ion binding; GO:0003676 nucleic acid binding; GO:0046872 metal ion binding; GO:0043169 cation binding; GO:0005515 protein binding; GO:0008270 zinc ion binding;	K12848	SNU23; U4/U6.U5 tri-snRNP component SNU23	hsa03040 Spliceosome	IPR003604; IPR022755;	Zinc finger, U1-type; Zinc finger, double-stranded RNA binding;
P61586	104	0.588	Down	4.1025e-05	K	Transforming protein RhoA OS=Homo sapiens OX=9606 GN=RHOA PE=1 SV=1	RHOA	1	5.97999e-08	100.02	WTPEVK(1)HFCPNVPIILVGNK	4	0.21964	2	1.315	1.323	1.356	0.779	0.749	0.819	cytoplasm	GO:0044085 cellular component biogenesis; GO:0044700 single organism signaling; GO:0021700 developmental maturation; GO:0090130 tissue migration; GO:0030038 contractile actin filament bundle assembly; GO:0010564 regulation of cell cycle process; GO:0044237 cellular metabolic process; GO:0010594 regulation of endothelial cell migration; GO:0090049 regulation of cell migration involved in sprouting…	GO:0030425 dendrite; GO:0016020 membrane; GO:0044421 extracellular region part; GO:0019898 extrinsic component of membrane; GO:0031090 organelle membrane; GO:0099568 cytoplasmic region; GO:0005737 cytoplasm; GO:0044433 cytoplasmic vesicle part; GO:0005623 cell; GO:0009898 cytoplasmic side of plasma membrane; GO:0032155 cell division site part; GO:0044422 organelle part; GO:0043197 dendritic spine…	GO:1901265 nucleoside phosphate binding; GO:0001882 nucleoside binding; GO:0043167 ion binding; GO:0016817 hydrolase activity, acting on acid anhydrides; GO:0005515 protein binding; GO:0016787 hydrolase activity; GO:0000166 nucleotide binding; GO:0017111 nucleoside-triphosphatase activity; GO:1901363 heterocyclic compound binding; GO:0097159 organic cyclic compound binding; GO:0032549 ribonucleos…	K04513	RHOA; Ras homolog gene family, member A	hsa04014 Ras signaling pathway; hsa04015 Rap1 signaling pathway; hsa04022 cGMP-PKG signaling pathway; hsa04024 cAMP signaling pathway; hsa04062 Chemokine signaling pathway; hsa04071 Sphingolipid signaling pathway; hsa04072 Phospholipase D signaling pathway; hsa04144 Endocytosis; hsa04150 mTOR signaling pathway; hsa04270 Vascular smooth muscle contraction; hsa04310 Wnt signaling pathway; hsa04350 …	IPR005225; IPR027417;	Small GTP-binding protein domain; P-loop containing nucleoside triphosphate hydrolase;
Q8NBS9	118	0.608	Down	0.0044169	K	Thioredoxin domain-containing protein 5 OS=Homo sapiens OX=9606 GN=TXNDC5 PE=1 SV=2	TXNDC5	1	1.78408e-22	139.02	VYVAK(1)VDCTAHSDVCSAQGVR	3	0.34245	2	1.432	1.361	1.146	0.837	0.716	0.841	extracellular	GO:0050794 regulation of cellular process; GO:0033554 cellular response to stress; GO:0065008 regulation of biological quality; GO:0010941 regulation of cell death; GO:0045321 leukocyte activation; GO:0002283 neutrophil activation involved in immune response; GO:0043069 negative regulation of programmed cell death; GO:0034976 response to endoplasmic reticulum stress; GO:0002252 immune effector pr…	GO:0034774 secretory granule lumen; GO:0005783 endoplasmic reticulum; GO:0044421 extracellular region part; GO:0031410 cytoplasmic vesicle; GO:0005737 cytoplasm; GO:0031982 vesicle; GO:0044433 cytoplasmic vesicle part; GO:0044424 intracellular part; GO:0035578 azurophil granule lumen; GO:0005623 cell; GO:0044422 organelle part; GO:0005775 vacuolar lumen; GO:0031974 membrane-enclosed lumen; GO:007…	GO:0016864 intramolecular oxidoreductase activity, transposing S-S bonds; GO:0005515 protein binding; GO:0016860 intramolecular oxidoreductase activity; GO:0016853 isomerase activity; GO:0003756 protein disulfide isomerase activity; GO:0003824 catalytic activity; GO:0005488 binding;	K13984	TXNDC5, ERP46; thioredoxin domain-containing protein 5	hsa04141 Protein processing in endoplasmic reticulum	IPR005788; IPR012336; IPR013766;	Disulphide isomerase; Thioredoxin-like fold; Thioredoxin domain;
Q8NBS9	390	0.569	Down	0.00045659	K	Thioredoxin domain-containing protein 5 OS=Homo sapiens OX=9606 GN=TXNDC5 PE=1 SV=2	TXNDC5	1	0.0142304	72.2	NICSK(1)YSVR	2	-1.5639	1	1.257	1.373	1.423	0.825	0.723	0.76	extracellular	GO:0050794 regulation of cellular process; GO:0033554 cellular response to stress; GO:0065008 regulation of biological quality; GO:0010941 regulation of cell death; GO:0045321 leukocyte activation; GO:0002283 neutrophil activation involved in immune response; GO:0043069 negative regulation of programmed cell death; GO:0034976 response to endoplasmic reticulum stress; GO:0002252 immune effector pr…	GO:0034774 secretory granule lumen; GO:0005783 endoplasmic reticulum; GO:0044421 extracellular region part; GO:0031410 cytoplasmic vesicle; GO:0005737 cytoplasm; GO:0031982 vesicle; GO:0044433 cytoplasmic vesicle part; GO:0044424 intracellular part; GO:0035578 azurophil granule lumen; GO:0005623 cell; GO:0044422 organelle part; GO:0005775 vacuolar lumen; GO:0031974 membrane-enclosed lumen; GO:007…	GO:0016864 intramolecular oxidoreductase activity, transposing S-S bonds; GO:0005515 protein binding; GO:0016860 intramolecular oxidoreductase activity; GO:0016853 isomerase activity; GO:0003756 protein disulfide isomerase activity; GO:0003824 catalytic activity; GO:0005488 binding;	K13984	TXNDC5, ERP46; thioredoxin domain-containing protein 5	hsa04141 Protein processing in endoplasmic reticulum	IPR005788; IPR012336; IPR013766;	Disulphide isomerase; Thioredoxin-like fold; Thioredoxin domain;
Q9NUQ6	189	0.621	Down	9.6065e-05	K	SPATS2-like protein OS=Homo sapiens OX=9606 GN=SPATS2L PE=1 SV=2	SPATS2L	1	3.64923e-05	66.893	SDGLQWSAEQPCNPSK(1)PK	3	0.29058	1	1.318	1.312	1.264	0.835	0.764	0.819	nucleus		GO:0043229 intracellular organelle; GO:0043232 intracellular non-membrane-bounded organelle; GO:0005737 cytoplasm; GO:0044446 intracellular organelle part; GO:0032991 macromolecular complex; GO:0031981 nuclear lumen; GO:0044424 intracellular part; GO:0005730 nucleolus; GO:0005829 cytosol; GO:0005623 cell; GO:0044422 organelle part; GO:0043228 non-membrane-bounded organelle; GO:0043231 intracellul…	GO:0097159 organic cyclic compound binding; GO:1901363 heterocyclic compound binding; GO:0003723 RNA binding; GO:0005515 protein binding; GO:0005488 binding; GO:0003676 nucleic acid binding;				IPR009060;	UBA-like;
O95816	9	0.609	Down	0.00082062	K	BAG family molecular chaperone regulator 2 OS=Homo sapiens OX=9606 GN=BAG2 PE=1 SV=1	BAG2	1	0.00341182	86.014	INAK(1)ANEGR	2	-0.71526	1	1.386	1.268	1.281	0.813	0.854	0.728	cytoplasm	GO:0050794 regulation of cellular process; GO:0080134 regulation of response to stress; GO:0044238 primary metabolic process; GO:0071704 organic substance metabolic process; GO:0006457 protein folding; GO:0008152 metabolic process; GO:0050789 regulation of biological process; GO:0080135 regulation of cellular response to stress; GO:0050790 regulation of catalytic activity; GO:0048583 regulation o…	GO:0044464 cell part; GO:0005622 intracellular; GO:0005737 cytoplasm; GO:0044424 intracellular part; GO:0005829 cytosol; GO:0005623 cell; GO:0044444 cytoplasmic part;	GO:1901265 nucleoside phosphate binding; GO:0051087 chaperone binding; GO:0060589 nucleoside-triphosphatase regulator activity; GO:0005515 protein binding; GO:0000166 nucleotide binding; GO:0098772 molecular function regulator; GO:1901363 heterocyclic compound binding; GO:0097159 organic cyclic compound binding; GO:0042802 identical protein binding; GO:0030234 enzyme regulator activity; GO:000548…	K09556	BAG2; BCL2-associated athanogene 2	hsa04141 Protein processing in endoplasmic reticulum	IPR003103;	BAG domain;
Q8NI27	1156	0.16	Down	0.000102576	K	THO complex subunit 2 OS=Homo sapiens OX=9606 GN=THOC2 PE=1 SV=2	THOC2	1	0.0045753	99.973	ICQEEK(1)EK	3	-1.0392	2	2.091	1.986	1.971	0.322	0.323	0.325	cytoplasm	GO:0050658 RNA transport; GO:0097659 nucleic acid-templated transcription; GO:0048666 neuron development; GO:0048869 cellular developmental process; GO:0044699 single-organism process; GO:0022008 neurogenesis; GO:0009058 biosynthetic process; GO:1902581 multi-organism cellular localization; GO:0051168 nuclear export; GO:0051169 nuclear transport; GO:0044764 multi-organism cellular process; GO:004…	GO:0043229 intracellular organelle; GO:0044446 intracellular organelle part; GO:0031981 nuclear lumen; GO:0032991 macromolecular complex; GO:0044424 intracellular part; GO:0000347 THO complex; GO:0016604 nuclear body; GO:0000445 THO complex part of transcription export complex; GO:0005623 cell; GO:0044422 organelle part; GO:0031974 membrane-enclosed lumen; GO:0043231 intracellular membrane-bounde…	GO:0097159 organic cyclic compound binding; GO:1901363 heterocyclic compound binding; GO:0003729 mRNA binding; GO:0003723 RNA binding; GO:0005488 binding; GO:0003676 nucleic acid binding; GO:0005515 protein binding;	K12879	THOC2; THO complex subunit 2	hsa03013 RNA transport; hsa03040 Spliceosome	IPR021418; IPR032302; IPR021726;	THO complex, subunitTHOC2, C-terminal; THO complex subunit 2, N-terminal domain; THO complex, subunitTHOC2, N-terminal;
Q9Y3I0	492	0.44	Down	4.3542e-05	K	tRNA-splicing ligase RtcB homolog OS=Homo sapiens OX=9606 GN=RTCB PE=1 SV=1	RTCB	1	5.61267e-20	143.46	NVTDVVNTCHDAGISK(1)K	3	0.34213	1	1.513	1.461	1.548	0.612	0.7	0.677	cytoplasm	GO:0000003 reproduction; GO:0044707 single-multicellular organism process; GO:0006725 cellular aromatic compound metabolic process; GO:0001890 placenta development; GO:0022414 reproductive process; GO:0043009 chordate embryonic development; GO:0044699 single-organism process; GO:0044237 cellular metabolic process; GO:0071704 organic substance metabolic process; GO:0008152 metabolic process; GO:00…	GO:0016020 membrane; GO:0005783 endoplasmic reticulum; GO:0042175 nuclear outer membrane-endoplasmic reticulum membrane network; GO:0005737 cytoplasm; GO:0032991 macromolecular complex; GO:0044424 intracellular part; GO:0005623 cell; GO:0044422 organelle part; GO:0031974 membrane-enclosed lumen; GO:0005654 nucleoplasm; GO:0072669 tRNA-splicing ligase complex; GO:0070013 intracellular organelle lu…	GO:1901265 nucleoside phosphate binding; GO:0016874 ligase activity; GO:0005515 protein binding; GO:1901363 heterocyclic compound binding; GO:0097159 organic cyclic compound binding; GO:0008092 cytoskeletal protein binding; GO:0003824 catalytic activity; GO:0032553 ribonucleotide binding; GO:0005488 binding; GO:0032550 purine ribonucleoside binding; GO:0043169 cation binding; GO:0043168 anion bin…	K14415	RTCB, rtcB; tRNA-splicing ligase RtcB [EC:6.5.1.3]
Q71DI3	28	0.443	Down	1.6986e-06	K	Histone H3.2 OS=Homo sapiens OX=9606 GN=HIST2H3A PE=1 SV=3	HIST2H3A	1	1.40381e-05	123.01	K(1)SAPATGGVK(0.953)K(0.047)PHR	3	-0.37205	17	1.551	1.487	1.475	0.667	0.648	0.685	nucleus	GO:0044085 cellular component biogenesis; GO:0007596 blood coagulation; GO:0065008 regulation of biological quality; GO:0044699 single-organism process; GO:0051253 negative regulation of RNA metabolic process; GO:0044237 cellular metabolic process; GO:0009611 response to wounding; GO:2001141 regulation of RNA biosynthetic process; GO:0008152 metabolic process; GO:0006334 nucleosome assembly; GO:0…	GO:0043229 intracellular organelle; GO:0044421 extracellular region part; GO:0043232 intracellular non-membrane-bounded organelle; GO:0031982 vesicle; GO:0044446 intracellular organelle part; GO:0031981 nuclear lumen; GO:0032991 macromolecular complex; GO:0044424 intracellular part; GO:0005623 cell; GO:0005576 extracellular region; GO:0044422 organelle part; GO:0044427 chromosomal part; GO:000078…	GO:0097159 organic cyclic compound binding; GO:1901363 heterocyclic compound binding; GO:0042393 histone binding; GO:0003677 DNA binding; GO:0046982 protein heterodimerization activity; GO:0005488 binding; GO:0046983 protein dimerization activity; GO:0003676 nucleic acid binding; GO:0005515 protein binding; GO:0003682 chromatin binding;	K11253	H3; histone H3	hsa05034 Alcoholism; hsa05131 Shigellosis; hsa05202 Transcriptional misregulation in cancer; hsa05322 Systemic lupus erythematosus	IPR009072; IPR007125;	Histone-fold; Histone H2A/H2B/H3;
Q71DI3	37	0.365	Down	1.5266e-07	K	Histone H3.2 OS=Homo sapiens OX=9606 GN=HIST2H3A PE=1 SV=3	HIST2H3A	1	2.2779e-05	124.42	SAPATGGVK(1)K	2	-0.35007	6	1.664	1.609	1.582	0.587	0.593	0.591	nucleus	GO:0044085 cellular component biogenesis; GO:0007596 blood coagulation; GO:0065008 regulation of biological quality; GO:0044699 single-organism process; GO:0051253 negative regulation of RNA metabolic process; GO:0044237 cellular metabolic process; GO:0009611 response to wounding; GO:2001141 regulation of RNA biosynthetic process; GO:0008152 metabolic process; GO:0006334 nucleosome assembly; GO:0…	GO:0043229 intracellular organelle; GO:0044421 extracellular region part; GO:0043232 intracellular non-membrane-bounded organelle; GO:0031982 vesicle; GO:0044446 intracellular organelle part; GO:0031981 nuclear lumen; GO:0032991 macromolecular complex; GO:0044424 intracellular part; GO:0005623 cell; GO:0005576 extracellular region; GO:0044422 organelle part; GO:0044427 chromosomal part; GO:000078…	GO:0097159 organic cyclic compound binding; GO:1901363 heterocyclic compound binding; GO:0042393 histone binding; GO:0003677 DNA binding; GO:0046982 protein heterodimerization activity; GO:0005488 binding; GO:0046983 protein dimerization activity; GO:0003676 nucleic acid binding; GO:0005515 protein binding; GO:0003682 chromatin binding;	K11253	H3; histone H3	hsa05034 Alcoholism; hsa05131 Shigellosis; hsa05202 Transcriptional misregulation in cancer; hsa05322 Systemic lupus erythematosus	IPR009072; IPR007125;	Histone-fold; Histone H2A/H2B/H3;
Q71DI3	10	1.777	Up	3.3362e-06	K	Histone H3.2 OS=Homo sapiens OX=9606 GN=HIST2H3A PE=1 SV=3	HIST2H3A	1	0.00024356	111.61	QTARK(1)STGGK(1)APR	2	0.94869	19	0.696	0.688	0.673	1.253	1.186	1.216	nucleus	GO:0044085 cellular component biogenesis; GO:0007596 blood coagulation; GO:0065008 regulation of biological quality; GO:0044699 single-organism process; GO:0051253 negative regulation of RNA metabolic process; GO:0044237 cellular metabolic process; GO:0009611 response to wounding; GO:2001141 regulation of RNA biosynthetic process; GO:0008152 metabolic process; GO:0006334 nucleosome assembly; GO:0…	GO:0043229 intracellular organelle; GO:0044421 extracellular region part; GO:0043232 intracellular non-membrane-bounded organelle; GO:0031982 vesicle; GO:0044446 intracellular organelle part; GO:0031981 nuclear lumen; GO:0032991 macromolecular complex; GO:0044424 intracellular part; GO:0005623 cell; GO:0005576 extracellular region; GO:0044422 organelle part; GO:0044427 chromosomal part; GO:000078…	GO:0097159 organic cyclic compound binding; GO:1901363 heterocyclic compound binding; GO:0042393 histone binding; GO:0003677 DNA binding; GO:0046982 protein heterodimerization activity; GO:0005488 binding; GO:0046983 protein dimerization activity; GO:0003676 nucleic acid binding; GO:0005515 protein binding; GO:0003682 chromatin binding;	K11253	H3; histone H3	hsa05034 Alcoholism; hsa05131 Shigellosis; hsa05202 Transcriptional misregulation in cancer; hsa05322 Systemic lupus erythematosus	IPR009072; IPR007125;	Histone-fold; Histone H2A/H2B/H3;
Q71DI3	19	1.533	Up	0.034541	K	Histone H3.2 OS=Homo sapiens OX=9606 GN=HIST2H3A PE=1 SV=3	HIST2H3A	1	2.45577e-18	167.09	STGGK(1)APRK(1)QLATK(1)AAR	2	0.22427	41	0.669	0.886	0.726	1.238	0.937	1.322	nucleus	GO:0044085 cellular component biogenesis; GO:0007596 blood coagulation; GO:0065008 regulation of biological quality; GO:0044699 single-organism process; GO:0051253 negative regulation of RNA metabolic process; GO:0044237 cellular metabolic process; GO:0009611 response to wounding; GO:2001141 regulation of RNA biosynthetic process; GO:0008152 metabolic process; GO:0006334 nucleosome assembly; GO:0…	GO:0043229 intracellular organelle; GO:0044421 extracellular region part; GO:0043232 intracellular non-membrane-bounded organelle; GO:0031982 vesicle; GO:0044446 intracellular organelle part; GO:0031981 nuclear lumen; GO:0032991 macromolecular complex; GO:0044424 intracellular part; GO:0005623 cell; GO:0005576 extracellular region; GO:0044422 organelle part; GO:0044427 chromosomal part; GO:000078…	GO:0097159 organic cyclic compound binding; GO:1901363 heterocyclic compound binding; GO:0042393 histone binding; GO:0003677 DNA binding; GO:0046982 protein heterodimerization activity; GO:0005488 binding; GO:0046983 protein dimerization activity; GO:0003676 nucleic acid binding; GO:0005515 protein binding; GO:0003682 chromatin binding;	K11253	H3; histone H3	hsa05034 Alcoholism; hsa05131 Shigellosis; hsa05202 Transcriptional misregulation in cancer; hsa05322 Systemic lupus erythematosus	IPR009072; IPR007125;	Histone-fold; Histone H2A/H2B/H3;
[truncated: 710 more rows]
