# Supplementary material for: Differential expression of lysine acetylation proteins in gastric cancer treated with a new antitumor agent bioactive peptide chelate selenium
Source: PeerJ. 2023 Jan 17;11:e14384. doi: 10.7717/peerj.14384 (PMC9854375; doi:10.7717/peerj.14384)
Supplement: Table S2 [file peerj-11-14384-s002.xlsx]

## Sheet: Up
GO Terms Level 1	GO Terms Description	GO Terms Level	GO Terms ID	Mapping	Background	All Mapping	All Background	Fold Enrichment	Fisher' exact test P value	-log10(p value)	Related Protein
Cellular Component	extracellular matrix	4	GO:0031012	26	95	229	1894	2.26	2.53041e-05	4.6	P04843 P48047 P23229 O75487 P62263 P63261 P78527 P02458 P15692 P21333 Q07065 P13639 P14625 P23528 P13726 P02765 P62805 P17844 Q15063 P27824 P62249 P62277 P24043 P62269 Q16787 P11021
	cell surface	4	GO:0009986	22	76	229	1894	2.39	4.33412e-05	4.36	P23229 O75487 Q4VCS5 P09429 P30101 Q99623 P08174 P17301 P08195 Q9NXR1 P35232 P15692 Q9Y696 P18564 P35580 P13726 P02749 P15291 P13987 P16422 P11021 O95858
	endoplasmic reticulum chaperone complex	10	GO:0034663	5	7	229	1894	5.91	0.000424087	3.37	P14625 Q15084 P23284 Q9Y4L1 P11021
	side of membrane	4	GO:0098552	13	44	229	1894	2.44	0.00138653	2.86	P18564 P06703 P36507 P23229 P13726 P15291 O75487 P13987 Q4VCS5 Q9H444 P27824 Q13009 P17301
	external side of plasma membrane	7	GO:0009897	8	20	229	1894	3.31	0.00139009	2.86	P18564 P23229 P13726 P15291 O75487 P13987 Q4VCS5 P17301
	dendritic spine	7	GO:0043197	8	20	229	1894	3.31	0.00139009	2.86	Q9UPX8 P27824 P35580 P23528 Q13009 Q7L576 P24043 Q14247
	anchored component of membrane	5	GO:0031225	3	3	229	1894	8.27	0.00174721	2.76	O75487 P13987 P08174
	extracellular space	4	GO:0005615	28	134	229	1894	1.73	0.00181019	2.74	P04075 Q5T655 Q16531 O75487 O43707 P02766 P53621 P02753 P30041 P09429 P63261 P02458 P53634 P15692 P23528 P00740 P13726 P02765 P02749 P62195 P15291 Q14520 P13987 Q15063 P26583 Q4V328 P18065 P24043
Molecular Function	single-stranded DNA binding	6	GO:0003697	11	27	230	1880	3.33	0.000158069	3.8	P36776 P09651 Q15365 Q15631 Q14566 P26583 P09429 P27694 Q9Y2W2 P53999 P42704
	rRNA binding	6	GO:0019843	9	27	230	1880	2.72	0.00336274	2.47	P13639 Q9Y2R5 P62263 P62917 P39023 Q92979 P46777 P62277 P62269
	damaged DNA binding	6	GO:0003684	7	18	230	1880	3.18	0.00362403	2.44	Q09472 P26583 P09429 P39748 Q16531 P27694 Q92793
	structural molecule activity	2	GO:0005198	31	161	230	1880	1.57	0.00488437	2.31	Q9NX63 P18124 Q9UPX8 Q12797 P09001 P61254 P15880 Q03135 P62263 P62917 P53621 P62753 Q13813 Q02878 P07196 P46777 P63261 P78559 P02458 Q9Y2R5 P61313 P46778 P39023 P62249 Q9BYC8 P62277 P24043 P62269 P35221 Q16787 P59998
	protein heterodimerization activity	5	GO:0046982	17	74	230	1880	1.88	0.0061386	2.21	Q9UBE0 Q9H4I2 Q03135 P55327 P02766 P02753 P07196 Q96KK5 Q71DI3 P17301 P15692 Q13564 P62805 Q71UI9 Q99525 P0C0S5 P35221
	core promoter proximal region DNA binding	8	GO:0001159	8	25	230	1880	2.62	0.0074701	2.13	P07910 P17480 Q8NI51 Q9UQR1 Q92793 P0C0S5 Q96T88 O94916
	serine-type endopeptidase activity	7	GO:0004252	5	12	230	1880	3.41	0.010057	2	P53634 Q9NRS4 P36776 P00740 Q14520
	alcohol binding	4	GO:0043178	4	8	230	1880	4.09	0.0102439	1.99	O75477 O94905 P02753 Q03135
Biological Process	positive regulation of cell motility	7	GO:2000147	15	47	223	1855	2.65	0.000216261	3.67	P21333 P15692 P23528 P23229 Q8IX12 P13726 O43707 Q4VCS5 Q15063 P09429 P16422 Q14185 Q13009 P11021 P17301
	regulation of programmed cell death	6	GO:0043067	43	215	223	1855	1.66	0.000232945	3.63	Q9NVI7 P23229 Q16531 P62753 P52565 P30101 Q13009 Q9Y4L1 P02458 Q14247 P53634 P15692 P35232 P23528 P13726 P02749 O75197 P15291 P13987 P47895 P16422 Q9BZZ5 P35221 P11021 O76021 P00338 P55072 Q92598 Q03135 O43707 P09429 P07196 Q99623 P78527 P21333 P14625 P62195 Q13557 Q13564 P31946 O95831 P26583 Q92793
	regulation of apoptotic process	7	GO:0042981	42	211	223	1855	1.66	0.000312414	3.51	Q9NVI7 P23229 Q16531 P62753 P52565 P30101 Q13009 Q9Y4L1 P02458 Q14247 P53634 P15692 P35232 P23528 P13726 P02749 O75197 P15291 P13987 P47895 P16422 Q9BZZ5 P35221 P11021 O76021 P00338 P55072 Q92598 Q03135 O43707 P09429 P07196 Q99623 P78527 P21333 P14625 Q13557 Q13564 P31946 O95831 P26583 Q92793
	positive regulation of cellular component movement	6	GO:0051272	15	49	223	1855	2.55	0.000362578	3.44	P21333 P15692 P23528 P23229 Q8IX12 P13726 O43707 Q4VCS5 Q15063 P09429 P16422 Q14185 Q13009 P11021 P17301
	regulation of cell motility	6	GO:2000145	20	80	223	1855	2.08	0.000783415	3.11	P23229 Q8IX12 O43707 Q4VCS5 P09429 Q13009 Q14185 P17301 P15692 P21333 Q9Y696 P23528 P02749 P13726 Q15063 P16422 P24043 P35221 Q16787 P11021
	ERAD pathway	7	GO:0036503	8	19	223	1855	3.5	0.000892551	3.05	O94905 P62333 P55072 P14625 P62195 Q8TCJ2 O75477 P11021
	cytoplasmic sequestering of protein	7	GO:0051220	4	5	223	1855	6.65	0.000923185	3.03	P21333 P30101 P31946 P11021
	protein activation cascade	6	GO:0072376	4	5	223	1855	6.65	0.000923185	3.03	P00740 P13726 P02749 P08174
	regulation of humoral immune response	6	GO:0002920	3	3	223	1855	8.32	0.00171681	2.77	P35232 P13987 P08174
	regulation of protein activation cascade	7	GO:2000257	3	3	223	1855	8.32	0.00171681	2.77	P35232 P13987 P08174
	positive regulation of chemotaxis	7	GO:0050921	5	9	223	1855	4.62	0.0020143	2.7	P15692 P13726 P09429 Q13009 P17301
	regulation of stem cell proliferation	6	GO:0072091	4	6	223	1855	5.55	0.00250844	2.6	P15692 P26583 P16422 P35221
	cellular response to calcium ion	7	GO:0071277	5	10	223	1855	4.16	0.00363737	2.44	Q9Y696 Q12797 Q13557 Q6NUK1 P11021
	terpenoid metabolic process	7	GO:0006721	5	10	223	1855	4.16	0.00363737	2.44	P02766 P02753 O75487 Q04828 P47895

## Sheet: Up GO2Protein
GO Terms Level 1	GO Terms ID	GO Terms Level	GO Terms Description	Fisher's exact test P value	Protein accession	Position	Ratio	Regulated Type	P value	Amino acid	Protein description	Gene name	Localization probability	PEP	Score	Modified sequence	Charge	Mass error [ppm]	MS/MS Count	MKN_45C1	MKN_45C2	MKN_45C3	MKN_45S1	MKN_45S2	MKN_45S3
Cellular Component	GO:0030425	6	dendrite	0.107914	P21333	994	1.525	Up	1.9772e-05	K	Filamin-A OS=Homo sapiens OX=9606 GN=FLNA PE=1 SV=4	FLNA	1	0.00346172	85.813	DQEFTVK(1)SK	3	-0.051795	2	0.786	0.743	0.763	1.155	1.183	1.157
Cellular Component	GO:0030425	6	dendrite	0.107914	Q9UPX8	1174	1.904	Up	0.00047943	K	SH3 and multiple ankyrin repeat domains protein 2 OS=Homo sapiens OX=9606 GN=SHANK2 PE=1 SV=3	SHANK2	1	0.0255254	57.281	MK(1)PIIHK	3	-3.76	1	0.718	0.65	0.589	1.296	1.239	1.192
Cellular Component	GO:0030425	6	dendrite	0.107914	P35580	1782	1.618	Up	0.00133836	K	Myosin-10 OS=Homo sapiens OX=9606 GN=MYH10 PE=1 SV=3	MYH10	1	0.000848405	90.614	SAAQK(1)SDNAR	2	-0.18483	1	0.811	0.675	0.713	1.145	1.249	1.164
Cellular Component	GO:0030425	6	dendrite	0.107914	P23528	92	1.643	Up	3.7006e-05	K	Cofilin-1 OS=Homo sapiens OX=9606 GN=CFL1 PE=1 SV=3	CFL1	1	1.70741e-10	121.99	YALYDATYETK(1)ESK	2	0.88008	2	0.714	0.743	0.716	1.144	1.227	1.2
Cellular Component	GO:0030425	6	dendrite	0.107914	Q7L576	1188	1.882	Up	5.6212e-05	K	Cytoplasmic FMR1-interacting protein 1 OS=Homo sapiens OX=9606 GN=CYFIP1 PE=1 SV=1	CYFIP1	0.999952	0.000231257	89.231	VQK(1)HDGKDEIIK	4	-1.3205	2	0.634	0.688	0.65	1.296	1.192	1.224
Cellular Component	GO:0030425	6	dendrite	0.107914	P62753	243	1.631	Up	0.000121433	K	40S ribosomal protein S6 OS=Homo sapiens OX=9606 GN=RPS6 PE=1 SV=1	RPS6	1	1.94239e-06	121.29	ASTSK(1)SESSQK	2	0.72863	2	0.736	0.685	0.766	1.194	1.197	1.175
Cellular Component	GO:0030425	6	dendrite	0.107914	P27824	87	1.514	Up	0.00095527	K	Calnexin OS=Homo sapiens OX=9606 GN=CANX PE=1 SV=2	CANX	1	0.014782	46.88	GTLSGWILSK(1)AK	3	-0.67335	1	0.807	0.786	0.712	1.226	1.112	1.152
Cellular Component	GO:0030425	6	dendrite	0.107914	Q13009	564	2.554	Up	2.264e-05	K	T-lymphoma invasion and metastasis-inducing protein 1 OS=Homo sapiens OX=9606 GN=TIAM1 PE=1 SV=2	TIAM1	1	0.00536023	86.794	LLK(1)SEIK	3	-0.69534	1	0.501	0.52	0.54	1.387	1.234	1.366
Cellular Component	GO:0030425	6	dendrite	0.107914	P24043	3092	1.918	Up	1.50302e-05	K	Laminin subunit alpha-2 OS=Homo sapiens OX=9606 GN=LAMA2 PE=1 SV=4	LAMA2	1	0.0350388	67.385	GCIRSLK(1)LTK	2	3.4243	1	0.661	0.626	0.658	1.283	1.221	1.227
Cellular Component	GO:0030425	6	dendrite	0.107914	Q14247	161	1.788	Up	3.79e-05	K	Src substrate cortactin OS=Homo sapiens OX=9606 GN=CTTN PE=1 SV=2	CTTN	1	5.64477e-17	133.78	DYSSGFGGK(1)YGVQADR	2	0.1629	2	0.677	0.659	0.712	1.252	1.23	1.179
Cellular Component	GO:0030425	6	dendrite	0.107914	Q14247	198	1.588	Up	0.00024373	K	Src substrate cortactin OS=Homo sapiens OX=9606 GN=CTTN PE=1 SV=2	CTTN	1	6.55628e-07	113.24	GFGGK(1)YGIDK	3	-0.15514	2	0.734	0.77	0.724	1.251	1.119	1.169
Cellular Component	GO:0009897	7	external side of plasma membrane	0.00139009	P18564	548	1.991	Up	0.0032991	K	Integrin beta-6 OS=Homo sapiens OX=9606 GN=ITGB6 PE=1 SV=2	ITGB6	1	9.92231e-07	77.037	HK(1)GLLCGGNGDCDCGECVCR	3	-0.47256	1	0.5	0.688	0.699	1.2	1.299	1.258
Cellular Component	GO:0009897	7	external side of plasma membrane	0.00139009	P23229	144	3.768	Up	1.57151e-05	K	Integrin alpha-6 OS=Homo sapiens OX=9606 GN=ITGA6 PE=1 SV=5	ITGA6	1	3.1719e-06	130.01	QHVNTK(1)QESR	2	1.0391	2	0.354	0.398	0.382	1.474	1.325	1.474
Cellular Component	GO:0009897	7	external side of plasma membrane	0.00139009	P23229	594	2.852	Up	0.0097615	K	Integrin alpha-6 OS=Homo sapiens OX=9606 GN=ITGA6 PE=1 SV=5	ITGA6	1	0.0014851	102.53	YTQELTLK(1)R	2	0.55207	2	0.382	0.524	0.521	1.331	1.345	1.394
Cellular Component	GO:0009897	7	external side of plasma membrane	0.00139009	P13726	233	2.168	Up	0.00033987	K	Tissue factor OS=Homo sapiens OX=9606 GN=F3 PE=1 SV=1	F3	1	2.77667e-05	95.57	K(1)STDSPVECMGQEK	3	2.065	1	0.588	0.527	0.659	1.34	1.252	1.254
Cellular Component	GO:0009897	7	external side of plasma membrane	0.00139009	P15291	348	1.811	Up	0.0005237	K	Beta-1,4-galactosyltransferase 1 OS=Homo sapiens OX=9606 GN=B4GALT1 PE=1 SV=5	B4GALT1	1	0.0295481	72.23	K(1)NEPNPQR	2	0.42742	1	0.751	0.632	0.648	1.279	1.22	1.18
Cellular Component	GO:0009897	7	external side of plasma membrane	0.00139009	O75487	44	1.652	Up	4.6607e-06	K	Glypican-4 OS=Homo sapiens OX=9606 GN=GPC4 PE=1 SV=4	GPC4	1	1.65724e-10	118.72	GFNK(1)NDAPLHEINGDHLK	4	0.22408	2	0.727	0.708	0.733	1.228	1.179	1.174
Cellular Component	GO:0009897	7	external side of plasma membrane	0.00139009	P13987	90	2.086	Up	2.1035e-06	K	CD59 glycoprotein OS=Homo sapiens OX=9606 GN=CD59 PE=1 SV=1	CD59	1	3.9152e-08	141.13	ENELTYYCCK(1)K	2	-0.33008	2	0.61	0.612	0.605	1.303	1.29	1.218
Cellular Component	GO:0009897	7	external side of plasma membrane	0.00139009	P13987	66	1.753	Up	0.00061964	K	CD59 glycoprotein OS=Homo sapiens OX=9606 GN=CD59 PE=1 SV=1	CD59	1	4.46545e-17	135.72	CWK(1)FEHCNFNDVTTR	3	-2.6005	1	0.661	0.66	0.756	1.253	1.26	1.128
Cellular Component	GO:0009897	7	external side of plasma membrane	0.00139009	Q4VCS5	585	2.51	Up	9.7814e-08	K	Angiomotin OS=Homo sapiens OX=9606 GN=AMOT PE=1 SV=1	AMOT	1	0.0447623	40.941	DQALSNAQAK(1)VVK	2	0.43599	1	0.537	0.526	0.519	1.311	1.317	1.343
Cellular Component	GO:0009897	7	external side of plasma membrane	0.00139009	P17301	261	4.97	Up	7.7205e-05	K	Integrin alpha-2 OS=Homo sapiens OX=9606 GN=ITGA2 PE=1 SV=1	ITGA2	1	5.75495e-08	138.89	K(1)YAYSAASGGR	2	-0.52946	1	0.253	0.307	0.334	1.631	1.406	1.406
Cellular Component	GO:0045177	4	apical part of cell	0.150547	P08195	266	1.608	Up	0.00037925	K	4F2 cell-surface antigen heavy chain OS=Homo sapiens OX=9606 GN=SLC3A2 PE=1 SV=3	SLC3A2	1	3.45387e-05	99.788	GLVLGPIHK(1)NQK	3	-0.25361	1	0.772	0.719	0.718	1.155	1.268	1.129
Cellular Component	GO:0045177	4	apical part of cell	0.150547	Q9Y696	146	1.747	Up	0.000158095	K	Chloride intracellular channel protein 4 OS=Homo sapiens OX=9606 GN=CLIC4 PE=1 SV=4	CLIC4	1	0.00711757	91.867	GLLK(1)TLQK	2	0.55617	1	0.693	0.685	0.705	1.273	1.121	1.245
Cellular Component	GO:0045177	4	apical part of cell	0.150547	Q9UPX8	1174	1.904	Up	0.00047943	K	SH3 and multiple ankyrin repeat domains protein 2 OS=Homo sapiens OX=9606 GN=SHANK2 PE=1 SV=3	SHANK2	1	0.0255254	57.281	MK(1)PIIHK	3	-3.76	1	0.718	0.65	0.589	1.296	1.239	1.192
Cellular Component	GO:0045177	4	apical part of cell	0.150547	P18065	207	5.699	Up	4.9835e-07	K	Insulin-like growth factor-binding protein 2 OS=Homo sapiens OX=9606 GN=IGFBP2 PE=1 SV=2	IGFBP2	1	0.00370776	54.343	GGK(1)HHLGLEEPK	4	0.020273	1	0.27	0.255	0.265	1.49	1.426	1.586
Cellular Component	GO:0045177	4	apical part of cell	0.150547	P18065	216	5.711	Up	2.5698e-06	K	Insulin-like growth factor-binding protein 2 OS=Homo sapiens OX=9606 GN=IGFBP2 PE=1 SV=2	IGFBP2	1	0.000564305	85.676	HHLGLEEPK(1)K	4	-0.036363	1	0.289	0.25	0.25	1.503	1.444	1.559
Cellular Component	GO:0045177	4	apical part of cell	0.150547	P16422	106	1.604	Up	9.7064e-05	K	Epithelial cell adhesion molecule OS=Homo sapiens OX=9606 GN=EPCAM PE=1 SV=2	EPCAM	1	1.06393e-16	97.771	AKPEGALQNNDGLYDPDCDESGLFK(1)AK	4	-0.73346	3	0.778	0.711	0.724	1.211	1.164	1.175
Cellular Component	GO:0045177	4	apical part of cell	0.150547	P16422	160	10.663	Up	1.6533e-07	K	Epithelial cell adhesion molecule OS=Homo sapiens OX=9606 GN=EPCAM PE=1 SV=2	EPCAM	1	0.000107872	110.08	EKPYDSK(1)SLR	2	-0.057166	2	0.152	0.147	0.146	1.691	1.532	1.522
Cellular Component	GO:0045177	4	apical part of cell	0.150547	Q03135	57	1.523	Up	0.0012176	K	Caveolin-1 OS=Homo sapiens OX=9606 GN=CAV1 PE=1 SV=4	CAV1	1	0.00201216	67.997	DPK(1)HLNDDVVK	3	1.0261	1	0.694	0.781	0.816	1.145	1.139	1.206
Cellular Component	GO:0045177	4	apical part of cell	0.150547	P04920	893	4.44	Up	4.2628e-05	K	Anion exchange protein 2 OS=Homo sapiens OX=9606 GN=SLC4A2 PE=1 SV=4	SLC4A2	1	2.23352e-06	112.42	SLAGQSGQGK(1)PR	2	-2.3535	1	0.287	0.375	0.323	1.476	1.415	1.482
Cellular Component	GO:0005924	5	cell-substrate adherens junction	0.00184201	P18124	223	1.556	Up	0.00049647	K	60S ribosomal protein L7 OS=Homo sapiens OX=9606 GN=RPL7 PE=1 SV=1	RPL7	1	2.59475e-29	179.94	K(1)TTHFVEGGDAGNREDQINR	3	-0.098351	4	0.789	0.778	0.693	1.183	1.144	1.19
Cellular Component	GO:0005924	5	cell-substrate adherens junction	0.00184201	P23229	144	3.768	Up	1.57151e-05	K	Integrin alpha-6 OS=Homo sapiens OX=9606 GN=ITGA6 PE=1 SV=5	ITGA6	1	3.1719e-06	130.01	QHVNTK(1)QESR	2	1.0391	2	0.354	0.398	0.382	1.474	1.325	1.474
Cellular Component	GO:0005924	5	cell-substrate adherens junction	0.00184201	P23229	594	2.852	Up	0.0097615	K	Integrin alpha-6 OS=Homo sapiens OX=9606 GN=ITGA6 PE=1 SV=5	ITGA6	1	0.0014851	102.53	YTQELTLK(1)R	2	0.55207	2	0.382	0.524	0.521	1.331	1.345	1.394
Cellular Component	GO:0005924	5	cell-substrate adherens junction	0.00184201	Q7L576	1188	1.882	Up	5.6212e-05	K	Cytoplasmic FMR1-interacting protein 1 OS=Homo sapiens OX=9606 GN=CYFIP1 PE=1 SV=1	CYFIP1	0.999952	0.000231257	89.231	VQK(1)HDGKDEIIK	4	-1.3205	2	0.634	0.688	0.65	1.296	1.192	1.224
Cellular Component	GO:0005924	5	cell-substrate adherens junction	0.00184201	P15880	275	3.946	Up	0.020878	K	40S ribosomal protein S2 OS=Homo sapiens OX=9606 GN=RPS2 PE=1 SV=2	RPS2	1	0.00013314	66.289	SPYQEFTDHLVK(1)THTR	4	-0.31731	1		0.19	0.445	1.296	1.113	1.35
Cellular Component	GO:0005924	5	cell-substrate adherens junction	0.00184201	Q03135	57	1.523	Up	0.0012176	K	Caveolin-1 OS=Homo sapiens OX=9606 GN=CAV1 PE=1 SV=4	CAV1	1	0.00201216	67.997	DPK(1)HLNDDVVK	3	1.0261	1	0.694	0.781	0.816	1.145	1.139	1.206
Cellular Component	GO:0005924	5	cell-substrate adherens junction	0.00184201	P62263	106	4.268	Up	8.5519e-07	K	40S ribosomal protein S14 OS=Homo sapiens OX=9606 GN=RPS14 PE=1 SV=3	RPS14	1	0.000851749	84.173	TK(1)TPGPGAQSALR	2	-2.5539	1	0.322	0.351	0.346	1.465	1.393	1.491
Cellular Component	GO:0005924	5	cell-substrate adherens junction	0.00184201	P62263	96	1.537	Up	0.0272	K	40S ribosomal protein S14 OS=Homo sapiens OX=9606 GN=RPS14 PE=1 SV=3	RPS14	1	7.38528e-07	110.08	ELGITALHIK(1)LR	3	0.52572	2	0.692	0.795	0.788	0.974	1.432	1.09
Cellular Component	GO:0005924	5	cell-substrate adherens junction	0.00184201	P04920	893	4.44	Up	4.2628e-05	K	Anion exchange protein 2 OS=Homo sapiens OX=9606 GN=SLC4A2 PE=1 SV=4	SLC4A2	1	2.23352e-06	112.42	SLAGQSGQGK(1)PR	2	-2.3535	1	0.287	0.375	0.323	1.476	1.415	1.482
Cellular Component	GO:0005924	5	cell-substrate adherens junction	0.00184201	P62917	46	1.894	Up	1.75293e-05	K	60S ribosomal protein L8 OS=Homo sapiens OX=9606 GN=RPL8 PE=1 SV=2	RPL8	1	0.000128202	96.464	GIVK(1)DIIHDPGR	2	-0.25301	2	0.668	0.643	0.653	1.287	1.189	1.244
Cellular Component	GO:0005924	5	cell-substrate adherens junction	0.00184201	O43707	779	1.506	Up	4.621e-06	K	Alpha-actinin-4 OS=Homo sapiens OX=9606 GN=ACTN4 PE=1 SV=2	ACTN4	1	2.1119e-07	92.098	ASFNHFDK(1)DHGGALGPEEFK	4	-0.48137	1	0.769	0.755	0.788	1.156	1.148	1.177
Cellular Component	GO:0005924	5	cell-substrate adherens junction	0.00184201	Q02878	192	1.535	Up	0.00026491	K	60S ribosomal protein L6 OS=Homo sapiens OX=9606 GN=RPL6 PE=1 SV=3	RPL6	1	0.000693341	75.589	THQK(1)FVIATSTK	3	-0.46954	1	0.74	0.814	0.728	1.184	1.162	1.156
Cellular Component	GO:0005924	5	cell-substrate adherens junction	0.00184201	P46777	27	1.597	Up	0.00119775	K	60S ribosomal protein L5 OS=Homo sapiens OX=9606 GN=RPL5 PE=1 SV=3	RPL5	1	0.0161426	70.412	EGK(1)TDYYAR	2	-0.47447	2	0.68	0.764	0.777	1.268	1.167	1.111
Cellular Component	GO:0005924	5	cell-substrate adherens junction	0.00184201	P30101	494	1.633	Up	0.00061616	K	Protein disulfide-isomerase A3 OS=Homo sapiens OX=9606 GN=PDIA3 PE=1 SV=4	PDIA3	1	1.11552e-22	158.91	EATNPPVIQEEK(1)PK	2	-0.21724	3	0.713	0.703	0.767	1.119	1.287	1.158
Cellular Component	GO:0005924	5	cell-substrate adherens junction	0.00184201	P63261	50	2.044	Up	0.00151871	K	Actin, cytoplasmic 2 OS=Homo sapiens OX=9606 GN=ACTG1 PE=1 SV=1	ACTG1	1	1.73645e-08	74.364	HQGVMVGMGQK(1)DSYVGDEAQSK	3	-0.91047	1	0.53	0.605	0.719	1.328	1.267	1.194
Cellular Component	GO:0005924	5	cell-substrate adherens junction	0.00184201	Q9Y4L1	991	1.814	Up	0.00105528	K	Hypoxia up-regulated protein 1 OS=Homo sapiens OX=9606 GN=HYOU1 PE=1 SV=1	HYOU1	1	0.0356549	68.657	EQSTGQK(1)R	2	-0.21595	1	0.705	0.586	0.734	1.194	1.25	1.23
Cellular Component	GO:0005924	5	cell-substrate adherens junction	0.00184201	Q9Y4L1	537	1.679	Up	0.00189553	K	Hypoxia up-regulated protein 1 OS=Homo sapiens OX=9606 GN=HYOU1 PE=1 SV=1	HYOU1	1	2.35366e-05	105.65	KYPDYESK(1)GIK	3	1.7955	1	0.728	0.644	0.773	1.297	1.201	1.103
Cellular Component	GO:0005924	5	cell-substrate adherens junction	0.00184201	Q14247	161	1.788	Up	3.79e-05	K	Src substrate cortactin OS=Homo sapiens OX=9606 GN=CTTN PE=1 SV=2	CTTN	1	5.64477e-17	133.78	DYSSGFGGK(1)YGVQADR	2	0.1629	2	0.677	0.659	0.712	1.252	1.23	1.179
Cellular Component	GO:0005924	5	cell-substrate adherens junction	0.00184201	Q14247	198	1.588	Up	0.00024373	K	Src substrate cortactin OS=Homo sapiens OX=9606 GN=CTTN PE=1 SV=2	CTTN	1	6.55628e-07	113.24	GFGGK(1)YGIDK	3	-0.15514	2	0.734	0.77	0.724	1.251	1.119	1.169
Cellular Component	GO:0005924	5	cell-substrate adherens junction	0.00184201	P17301	261	4.97	Up	7.7205e-05	K	Integrin alpha-2 OS=Homo sapiens OX=9606 GN=ITGA2 PE=1 SV=1	ITGA2	1	5.75495e-08	138.89	K(1)YAYSAASGGR	2	-0.52946	1	0.253	0.307	0.334	1.631	1.406	1.406
Cellular Component	GO:0005924	5	cell-substrate adherens junction	0.00184201	P21333	994	1.525	Up	1.9772e-05	K	Filamin-A OS=Homo sapiens OX=9606 GN=FLNA PE=1 SV=4	FLNA	1	0.00346172	85.813	DQEFTVK(1)SK	3	-0.051795	2	0.786	0.743	0.763	1.155	1.183	1.157
Cellular Component	GO:0005924	5	cell-substrate adherens junction	0.00184201	P18564	548	1.991	Up	0.0032991	K	Integrin beta-6 OS=Homo sapiens OX=9606 GN=ITGB6 PE=1 SV=2	ITGB6	1	9.92231e-07	77.037	HK(1)GLLCGGNGDCDCGECVCR	3	-0.47256	1	0.5	0.688	0.699	1.2	1.299	1.258
Cellular Component	GO:0005924	5	cell-substrate adherens junction	0.00184201	P36507	108	1.663	Up	0.0022007	K	Dual specificity mitogen-activated protein kinase kinase 2 OS=Homo sapiens OX=9606 GN=MAP2K2 PE=1 SV=1	MAP2K2	1	4.9811e-05	95.483	LIHLEIK(1)PAIR	3	-0.84799	1	0.79	0.663	0.705	1.236	1.078	1.275
Cellular Component	GO:0005924	5	cell-substrate adherens junction	0.00184201	P14625	467	2.375	Up	0.00132479	K	Endoplasmin OS=Homo sapiens OX=9606 GN=HSP90B1 PE=1 SV=1	HSP90B1	1	0.0260932	82.287	K(1)TLDMIK	2	-1.9897	1	0.517	0.571	0.564	1.316	1.312	1.296
Cellular Component	GO:0005924	5	cell-substrate adherens junction	0.00184201	P14625	473	1.531	Up	0.0021359	K	Endoplasmin OS=Homo sapiens OX=9606 GN=HSP90B1 PE=1 SV=1	HSP90B1	1	0.0291692	80.438	TLDMIK(1)K	3	-0.98878	2	0.833	0.741	0.715	1.239	1.084	1.181
Cellular Component	GO:0005924	5	cell-substrate adherens junction	0.00184201	P23528	92	1.643	Up	3.7006e-05	K	Cofilin-1 OS=Homo sapiens OX=9606 GN=CFL1 PE=1 SV=3	CFL1	1	1.70741e-10	121.99	YALYDATYETK(1)ESK	2	0.88008	2	0.714	0.743	0.716	1.144	1.227	1.2
Cellular Component	GO:0005924	5	cell-substrate adherens junction	0.00184201	P31946	70	1.526	Up	0.0008628	K	14-3-3 protein beta/alpha OS=Homo sapiens OX=9606 GN=YWHAB PE=1 SV=3	YWHAB	1	1.60397e-05	106.67	VISSIEQK(1)TER	3	-0.051644	2	0.777	0.814	0.701	1.201	1.131	1.165
Cellular Component	GO:0005924	5	cell-substrate adherens junction	0.00184201	P23284	215	2.768	Up	5.7981e-05	K	Peptidyl-prolyl cis-trans isomerase B OS=Homo sapiens OX=9606 GN=PPIB PE=1 SV=2	PPIB	0.999974	0.00810599	71.531	IEVEKPFAIAK(1)E	2	0.05953	1	0.53	0.45	0.485	1.419	1.275	1.361
Cellular Component	GO:0005924	5	cell-substrate adherens junction	0.00184201	P23284	186	1.623	Up	0.00046209	K	Peptidyl-prolyl cis-trans isomerase B OS=Homo sapiens OX=9606 GN=PPIB PE=1 SV=2	PPIB	1	0.00214624	76.326	VESTK(1)TDSR	2	1.0719	2	0.776	0.75	0.668	1.175	1.209	1.177
Cellular Component	GO:0005924	5	cell-substrate adherens junction	0.00184201	P23284	129	1.737	Up	2.1985e-06	K	Peptidyl-prolyl cis-trans isomerase B OS=Homo sapiens OX=9606 GN=PPIB PE=1 SV=2	PPIB	1	0.0113626	70.942	FPDENFK(1)LK	3	-0.38822	2	0.71	0.703	0.677	1.218	1.193	1.22
Cellular Component	GO:0005924	5	cell-substrate adherens junction	0.00184201	P13987	90	2.086	Up	2.1035e-06	K	CD59 glycoprotein OS=Homo sapiens OX=9606 GN=CD59 PE=1 SV=1	CD59	1	3.9152e-08	141.13	ENELTYYCCK(1)K	2	-0.33008	2	0.61	0.612	0.605	1.303	1.29	1.218
Cellular Component	GO:0005924	5	cell-substrate adherens junction	0.00184201	P13987	66	1.753	Up	0.00061964	K	CD59 glycoprotein OS=Homo sapiens OX=9606 GN=CD59 PE=1 SV=1	CD59	1	4.46545e-17	135.72	CWK(1)FEHCNFNDVTTR	3	-2.6005	1	0.661	0.66	0.756	1.253	1.26	1.128
Cellular Component	GO:0005924	5	cell-substrate adherens junction	0.00184201	P39023	66	1.637	Up	1.8678e-05	K	60S ribosomal protein L3 OS=Homo sapiens OX=9606 GN=RPL3 PE=1 SV=2	RPL3	1	0.0020035	71.153	EVDRPGSK(1)VNK	3	-0.11062	1	0.705	0.753	0.721	1.174	1.195	1.199
Cellular Component	GO:0005924	5	cell-substrate adherens junction	0.00184201	P39023	115	1.601	Up	0.00150122	K	60S ribosomal protein L3 OS=Homo sapiens OX=9606 GN=RPL3 PE=1 SV=2	RPL3	1	0.000290809	84.734	TVFAEHISDECK(1)R	3	-0.2477	1	0.682	0.738	0.796	1.244	1.216	1.088
Cellular Component	GO:0005924	5	cell-substrate adherens junction	0.00184201	P62249	26	1.879	Up	0.0027232	K	40S ribosomal protein S16 OS=Homo sapiens OX=9606 GN=RPS16 PE=1 SV=2	RPS16	1	0.0195879	51.762	TATAVAHCK(1)R	3	-0.38563	1	0.581	0.604	0.786	1.233	1.194	1.277
Cellular Component	GO:0005924	5	cell-substrate adherens junction	0.00184201	P62277	34	1.54	Up	5.7354e-05	K	40S ribosomal protein S13 OS=Homo sapiens OX=9606 GN=RPS13 PE=1 SV=2	RPS13	1	4.38739e-08	131.35	LTSDDVK(1)EQIYK	2	0.23715	1	0.761	0.744	0.773	1.215	1.163	1.13
Cellular Component	GO:0005924	5	cell-substrate adherens junction	0.00184201	P62269	137	1.73	Up	2.4191e-06	K	40S ribosomal protein S18 OS=Homo sapiens OX=9606 GN=RPS18 PE=1 SV=3	RPS18	1	0.00404982	83.438	GQHTK(1)TTGR	2	0.13381	2	0.682	0.709	0.705	1.22	1.182	1.224
Cellular Component	GO:0005924	5	cell-substrate adherens junction	0.00184201	P35221	881	1.511	Up	0.00040268	K	Catenin alpha-1 OS=Homo sapiens OX=9606 GN=CTNNA1 PE=1 SV=1	CTNNA1	1	0.00164808	73.927	EKQDETQTK(1)IK	3	0.98541	1	0.774	0.811	0.723	1.193	1.172	1.122
Cellular Component	GO:0005924	5	cell-substrate adherens junction	0.00184201	P11021	553	1.584	Up	0.00051646	K	Endoplasmic reticulum chaperone BiP OS=Homo sapiens OX=9606 GN=HSPA5 PE=1 SV=2	HSPA5	1	0.0198462	68.915	FAEEDK(1)K	3	0.25072	1	0.739	0.758	0.737	1.273	1.094	1.171
Cellular Component	GO:0005924	5	cell-substrate adherens junction	0.00184201	P11021	352	1.593	Up	7.6558e-05	K	Endoplasmic reticulum chaperone BiP OS=Homo sapiens OX=9606 GN=HSPA5 PE=1 SV=2	HSPA5	1	0.000769989	104.22	VLEDSDLK(1)K	3	2.7364	2	0.731	0.73	0.76	1.123	1.214	1.2
Cellular Component	GO:0000786	11	nucleosome	0.0438012	Q99525	17	1.747	Up	0.020535	K	Histone H4-like protein type G OS=Homo sapiens OX=9606 GN=HIST1H4G PE=1 SV=1	HIST1H4G	1	0.00152844	84.31	GLGK(1)GGAK(1)CHR	3	1.0158	1	0.68	0.775	0.62	1.094	0.996	1.535
Cellular Component	GO:0000786	11	nucleosome	0.0438012	P10412	63	1.615	Up	2.6726e-09	K	Histone H1.4 OS=Homo sapiens OX=9606 GN=H1-4 PE=1 SV=2	H1-4	1	0.000637306	85.355	SGVSLAALK(1)K	3	0.16261	1	0.734	0.735	0.733	1.191	1.181	1.184
Cellular Component	GO:0000786	11	nucleosome	0.0438012	P62805	92	2.182	Up	1.6411e-05	K	Histone H4 OS=Homo sapiens OX=9606 GN=H4C1 PE=1 SV=2	H4C1	1	6.24962e-36	186.16	TVTAMDVVYALK(1)R	2	-0.23684	16	0.562	0.581	0.621	1.289	1.292	1.268
Cellular Component	GO:0000786	11	nucleosome	0.0438012	P62805	32	1.653	Up	0.0134408	K	Histone H4 OS=Homo sapiens OX=9606 GN=H4C1 PE=1 SV=2	H4C1	1	3.04485e-08	128.68	DNIQGITK(1)PAIR	2	0.4573	2	0.677	0.679	0.809	1.203	1.199	1.177
Cellular Component	GO:0000786	11	nucleosome	0.0438012	P62805	80	2.391	Up	2.114e-07	K	Histone H4 OS=Homo sapiens OX=9606 GN=H4C1 PE=1 SV=2	H4C1	1	3.87738e-17	153.23	K(1)TVTAMDVVYALK(1)R	3	-0.75923	21	0.556	0.541	0.548	1.342	1.293	1.298
Cellular Component	GO:0000786	11	nucleosome	0.0438012	P62805	78	1.846	Up	1.73873e-05	K	Histone H4 OS=Homo sapiens OX=9606 GN=H4C1 PE=1 SV=2	H4C1	1	3.72767e-11	151.98	DAVTYTEHAK(1)R	2	0.33428	3	0.693	0.658	0.65	1.26	1.199	1.235
Cellular Component	GO:0000786	11	nucleosome	0.0438012	P62805	17	1.611	Up	2.4396e-05	K	Histone H4 OS=Homo sapiens OX=9606 GN=H4C1 PE=1 SV=2	H4C1	1	1.37446e-45	190.24	GLGK(1)GGAK(1)R	2	-1.3239	136	0.728	0.747	0.73	1.202	1.136	1.215
Cellular Component	GO:0000786	11	nucleosome	0.0438012	Q96KK5	37	1.556	Up	0.00027896	K	Histone H2A type 1-H OS=Homo sapiens OX=9606 GN=HIST1H2AH PE=1 SV=3	HIST1H2AH	1	0.012122	96.311	K(1)GNYAER	2	0.80708	1	0.728	0.743	0.79	1.238	1.142	1.138
Cellular Component	GO:0000786	11	nucleosome	0.0438012	Q96KK5	96	1.532	Up	0.000135907	K	Histone H2A type 1-H OS=Homo sapiens OX=9606 GN=HIST1H2AH PE=1 SV=3	HIST1H2AH	1	3.40253e-08	141.58	NDEELNK(1)LLGK	2	-0.23047	2	0.728	0.792	0.764	1.153	1.204	1.141
Cellular Component	GO:0000786	11	nucleosome	0.0438012	Q96KK5	126	1.639	Up	7.7928e-05	K	Histone H2A type 1-H OS=Homo sapiens OX=9606 GN=HIST1H2AH PE=1 SV=3	HIST1H2AH	1	0.00072571	91.318	TESHHK(1)AK	3	0.69454	6	0.726	0.693	0.76	1.222	1.176	1.174
Cellular Component	GO:0000786	11	nucleosome	0.0438012	Q71DI3	19	1.533	Up	0.034541	K	Histone H3.2 OS=Homo sapiens OX=9606 GN=HIST2H3A PE=1 SV=3	HIST2H3A	1	2.45577e-18	167.09	STGGK(1)APRK(1)QLATK(1)AAR	2	0.22427	41	0.669	0.886	0.726	1.238	0.937	1.322
Cellular Component	GO:0000786	11	nucleosome	0.0438012	Q71DI3	10	1.777	Up	3.3362e-06	K	Histone H3.2 OS=Homo sapiens OX=9606 GN=HIST2H3A PE=1 SV=3	HIST2H3A	1	0.00024356	111.61	QTARK(1)STGGK(1)APR	2	0.94869	19	0.696	0.688	0.673	1.253	1.186	1.216
Cellular Component	GO:0000786	11	nucleosome	0.0438012	P0C0S5	8	2.197	Up	4.9094e-07	K	Histone H2A.Z OS=Homo sapiens OX=9606 GN=H2AZ1 PE=1 SV=2	H2AZ1	1	2.41356e-07	111.64	AGK(1)DSGK(1)AK(1)TK	2	0.79948	12	0.591	0.582	0.583	1.323	1.257	1.278
Cellular Component	GO:0000786	11	nucleosome	0.0438012	P0C0S5	12	2.225	Up	3.9617e-07	K	Histone H2A.Z OS=Homo sapiens OX=9606 GN=H2AZ1 PE=1 SV=2	H2AZ1	1	2.41356e-07	111.64	AGK(1)DSGK(1)AK(1)TK	2	0.79948	10	0.585	0.579	0.575	1.326	1.264	1.279
Cellular Component	GO:0000786	11	nucleosome	0.0438012	P0C0S5	5	1.669	Up	5.8561e-05	K	Histone H2A.Z OS=Homo sapiens OX=9606 GN=H2AZ1 PE=1 SV=2	H2AZ1	1	2.41356e-07	111.64	AGGK(1)AGK(1)DSGK(1)AK(1)TK	2	0.11281	10	0.749	0.714	0.689	1.227	1.164	1.201
Cellular Component	GO:0000786	11	nucleosome	0.0438012	P0C0S5	14	2.729	Up	2.1717e-06	K	Histone H2A.Z OS=Homo sapiens OX=9606 GN=H2AZ1 PE=1 SV=2	H2AZ1	1	2.41356e-07	106.57	AGK(1)DSGK(1)AK(1)TK	2	0.79948	4	0.511	0.491	0.48	1.402	1.295	1.348
Cellular Component	GO:0000786	11	nucleosome	0.0438012	Q71UI9	8	1.776	Up	7.1996e-08	K	Histone H2A.V OS=Homo sapiens OX=9606 GN=H2AFV PE=1 SV=3	H2AFV	1	5.25348e-06	111.64	AGK(1)DSGK(1)AK(1)AK	2	0.56256	10	0.682	0.683	0.692	1.231	1.214	1.209
Cellular Component	GO:0000786	11	nucleosome	0.0438012	Q71UI9	12	1.771	Up	4.7604e-08	K	Histone H2A.V OS=Homo sapiens OX=9606 GN=H2AFV PE=1 SV=3	H2AFV	1	5.25348e-06	111.64	AGK(1)DSGK(1)AK(1)AK	2	0.56256	8	0.684	0.688	0.689	1.228	1.219	1.203
Cellular Component	GO:0000786	11	nucleosome	0.0438012	Q71UI9	14	1.84	Up	6.056e-07	K	Histone H2A.V OS=Homo sapiens OX=9606 GN=H2AFV PE=1 SV=3	H2AFV	1	0.00142022	96.464	AGK(1)DSGK(1)AK(1)AK	2	0.56256	2	0.675	0.674	0.655	1.23	1.211	1.247
Cellular Component	GO:0097223	4	sperm part	0.243116	Q3KNS1	681	2.794	Up	4.0467e-05	K	Patched domain-containing protein 3 OS=Homo sapiens OX=9606 GN=PTCHD3 PE=1 SV=3	PTCHD3	1	0.0336516	40.496	LENCTK(1)IFEK	3	3.9422	1	0.52	0.493	0.44	1.312	1.401	1.346
Cellular Component	GO:0097223	4	sperm part	0.243116	Q15643	819	1.941	Up	0.000179346	K	Thyroid receptor-interacting protein 11 OS=Homo sapiens OX=9606 GN=TRIP11 PE=1 SV=3	TRIP11	1	0.025517	51.346	EIFIEK(1)LK	3	0.83552	1	0.602	0.698	0.625	1.244	1.199	1.294
Cellular Component	GO:0097223	4	sperm part	0.243116	P35221	881	1.511	Up	0.00040268	K	Catenin alpha-1 OS=Homo sapiens OX=9606 GN=CTNNA1 PE=1 SV=1	CTNNA1	1	0.00164808	73.927	EKQDETQTK(1)IK	3	0.98541	1	0.774	0.811	0.723	1.193	1.172	1.122
Cellular Component	GO:0097223	4	sperm part	0.243116	Q03135	57	1.523	Up	0.0012176	K	Caveolin-1 OS=Homo sapiens OX=9606 GN=CAV1 PE=1 SV=4	CAV1	1	0.00201216	67.997	DPK(1)HLNDDVVK	3	1.0261	1	0.694	0.781	0.816	1.145	1.139	1.206
Cellular Component	GO:0048770	9	pigment granule	0.08444	P08195	266	1.608	Up	0.00037925	K	4F2 cell-surface antigen heavy chain OS=Homo sapiens OX=9606 GN=SLC3A2 PE=1 SV=3	SLC3A2	1	3.45387e-05	99.788	GLVLGPIHK(1)NQK	3	-0.25361	1	0.772	0.719	0.718	1.155	1.268	1.129
Cellular Component	GO:0048770	9	pigment granule	0.08444	P04843	187	2.143	Up	1.58621e-05	K	Dolichyl-diphosphooligosaccharide--protein glycosyltransferase subunit 1 OS=Homo sapiens OX=9606 GN=RPN1 PE=1 SV=1	RPN1	1	1.75673e-17	156.17	NVESYTK(1)LGNPTR	2	-0.077266	1	0.57	0.614	0.604	1.244	1.32	1.267
Cellular Component	GO:0048770	9	pigment granule	0.08444	P14625	467	2.375	Up	0.00132479	K	Endoplasmin OS=Homo sapiens OX=9606 GN=HSP90B1 PE=1 SV=1	HSP90B1	1	0.0260932	82.287	K(1)TLDMIK	2	-1.9897	1	0.517	0.571	0.564	1.316	1.312	1.296
Cellular Component	GO:0048770	9	pigment granule	0.08444	P14625	473	1.531	Up	0.0021359	K	Endoplasmin OS=Homo sapiens OX=9606 GN=HSP90B1 PE=1 SV=1	HSP90B1	1	0.0291692	80.438	TLDMIK(1)K	3	-0.98878	2	0.833	0.741	0.715	1.239	1.084	1.181
Cellular Component	GO:0048770	9	pigment granule	0.08444	Q15084	368	1.539	Up	1.70414e-05	K	Protein disulfide-isomerase A6 OS=Homo sapiens OX=9606 GN=PDIA6 PE=1 SV=1	PDIA6	1	0.0107878	97.798	MK(1)FALLK	2	-0.72228	1	0.752	0.78	0.746	1.188	1.148	1.169
Cellular Component	GO:0048770	9	pigment granule	0.08444	P31946	70	1.526	Up	0.0008628	K	14-3-3 protein beta/alpha OS=Homo sapiens OX=9606 GN=YWHAB PE=1 SV=3	YWHAB	1	1.60397e-05	106.67	VISSIEQK(1)TER	3	-0.051644	2	0.777	0.814	0.701	1.201	1.131	1.165
Cellular Component	GO:0048770	9	pigment granule	0.08444	P23284	215	2.768	Up	5.7981e-05	K	Peptidyl-prolyl cis-trans isomerase B OS=Homo sapiens OX=9606 GN=PPIB PE=1 SV=2	PPIB	0.999974	0.00810599	71.531	IEVEKPFAIAK(1)E	2	0.05953	1	0.53	0.45	0.485	1.419	1.275	1.361
Cellular Component	GO:0048770	9	pigment granule	0.08444	P23284	186	1.623	Up	0.00046209	K	Peptidyl-prolyl cis-trans isomerase B OS=Homo sapiens OX=9606 GN=PPIB PE=1 SV=2	PPIB	1	0.00214624	76.326	VESTK(1)TDSR	2	1.0719	2	0.776	0.75	0.668	1.175	1.209	1.177
Cellular Component	GO:0048770	9	pigment granule	0.08444	P23284	129	1.737	Up	2.1985e-06	K	Peptidyl-prolyl cis-trans isomerase B OS=Homo sapiens OX=9606 GN=PPIB PE=1 SV=2	PPIB	1	0.0113626	70.942	FPDENFK(1)LK	3	-0.38822	2	0.71	0.703	0.677	1.218	1.193	1.22
Cellular Component	GO:0048770	9	pigment granule	0.08444	P27824	87	1.514	Up	0.00095527	K	Calnexin OS=Homo sapiens OX=9606 GN=CANX PE=1 SV=2	CANX	1	0.014782	46.88	GTLSGWILSK(1)AK	3	-0.67335	1	0.807	0.786	0.712	1.226	1.112	1.152
Cellular Component	GO:0048770	9	pigment granule	0.08444	P30101	494	1.633	Up	0.00061616	K	Protein disulfide-isomerase A3 OS=Homo sapiens OX=9606 GN=PDIA3 PE=1 SV=4	PDIA3	1	1.11552e-22	158.91	EATNPPVIQEEK(1)PK	2	-0.21724	3	0.713	0.703	0.767	1.119	1.287	1.158
Cellular Component	GO:0048770	9	pigment granule	0.08444	P11021	553	1.584	Up	0.00051646	K	Endoplasmic reticulum chaperone BiP OS=Homo sapiens OX=9606 GN=HSPA5 PE=1 SV=2	HSPA5	1	0.0198462	68.915	FAEEDK(1)K	3	0.25072	1	0.739	0.758	0.737	1.273	1.094	1.171
Cellular Component	GO:0048770	9	pigment granule	0.08444	P11021	352	1.593	Up	7.6558e-05	K	Endoplasmic reticulum chaperone BiP OS=Homo sapiens OX=9606 GN=HSPA5 PE=1 SV=2	HSPA5	1	0.000769989	104.22	VLEDSDLK(1)K	3	2.7364	2	0.731	0.73	0.76	1.123	1.214	1.2
Cellular Component	GO:1990351	3	transporter complex	0.0971656	Q9Y696	146	1.747	Up	0.000158095	K	Chloride intracellular channel protein 4 OS=Homo sapiens OX=9606 GN=CLIC4 PE=1 SV=4	CLIC4	1	0.00711757	91.867	GLLK(1)TLQK	2	0.55617	1	0.693	0.685	0.705	1.273	1.121	1.245
Cellular Component	GO:1990351	3	transporter complex	0.0971656	Q12797	336	1.771	Up	0.0099388	K	Aspartyl/asparaginyl beta-hydroxylase OS=Homo sapiens OX=9606 GN=ASPH PE=1 SV=3	ASPH	1	0.0197409	87.476	LLNK(1)FDK	2	2.2137	1	0.759	0.622	0.682	1.221	1.227	1.206
Cellular Component	GO:1990351	3	transporter complex	0.0971656	P47985	101	1.523	Up	0.031261	K	Cytochrome b-c1 complex subunit Rieske, mitochondrial OS=Homo sapiens OX=9606 GN=UQCRFS1 PE=1 SV=2	UQCRFS1	1	0.00038399	92.99	LEVLDSTK(1)SSR	2	-1.559	1	0.714	0.657	0.922	1.111	1.353	1.029
Cellular Component	GO:1990351	3	transporter complex	0.0971656	Q14247	161	1.788	Up	3.79e-05	K	Src substrate cortactin OS=Homo sapiens OX=9606 GN=CTTN PE=1 SV=2	CTTN	1	5.64477e-17	133.78	DYSSGFGGK(1)YGVQADR	2	0.1629	2	0.677	0.659	0.712	1.252	1.23	1.179
Cellular Component	GO:1990351	3	transporter complex	0.0971656	Q14247	198	1.588	Up	0.00024373	K	Src substrate cortactin OS=Homo sapiens OX=9606 GN=CTTN PE=1 SV=2	CTTN	1	6.55628e-07	113.24	GFGGK(1)YGIDK	3	-0.15514	2	0.734	0.77	0.724	1.251	1.119	1.169
Cellular Component	GO:0045121	6	membrane raft	0.1206	O94905	287	1.947	Up	0.000141126	K	Erlin-2 OS=Homo sapiens OX=9606 GN=ERLIN2 PE=1 SV=1	ERLIN2	1	0.00766576	78.342	YK(1)AIASNSK	2	0.25171	1	0.588	0.669	0.666	1.295	1.242	1.207
Cellular Component	GO:0045121	6	membrane raft	0.1206	P13639	32	1.652	Up	0.0028208	K	Elongation factor 2 OS=Homo sapiens OX=9606 GN=EEF2 PE=1 SV=4	EEF2	1	0.000910029	50.858	NMSVIAHVDHGK(1)STLTDSLVCK	4	-0.77941	1	0.655	0.728	0.777	1.058	1.229	1.282
Cellular Component	GO:0045121	6	membrane raft	0.1206	Q96C19	191	1.511	Up	0.0064243	K	EF-hand domain-containing protein D2 OS=Homo sapiens OX=9606 GN=EFHD2 PE=1 SV=1	EFHD2	1	0.00480638	81.017	GAK(1)SFFEAK	2	-0.24747	1	0.812	0.771	0.724	1.17	1.159	1.157
Cellular Component	GO:0045121	6	membrane raft	0.1206	Q96C19	226	1.801	Up	1.50441e-05	K	EF-hand domain-containing protein D2 OS=Homo sapiens OX=9606 GN=EFHD2 PE=1 SV=1	EFHD2	1	0.0342552	68.657	QAEEMK(1)QR	2	-1.2691	1	0.651	0.697	0.687	1.213	1.221	1.232
Cellular Component	GO:0045121	6	membrane raft	0.1206	P21796	61	1.877	Up	2.673e-06	K	Voltage-dependent anion-selective channel protein 1 OS=Homo sapiens OX=9606 GN=VDAC1 PE=1 SV=2	VDAC1	1	0.00011548	117.25	VTGSLETK(1)YR	3	1.0352	3	0.663	0.636	0.677	1.244	1.244	1.221
Cellular Component	GO:0045121	6	membrane raft	0.1206	P21796	20	1.506	Up	6.0692e-05	K	Voltage-dependent anion-selective channel protein 1 OS=Homo sapiens OX=9606 GN=VDAC1 PE=1 SV=2	VDAC1	1	5.63016e-11	131.66	DVFTK(1)GYGFGLIK	2	0.76596	2	0.765	0.794	0.754	1.198	1.157	1.128
Cellular Component	GO:0045121	6	membrane raft	0.1206	P35221	881	1.511	Up	0.00040268	K	Catenin alpha-1 OS=Homo sapiens OX=9606 GN=CTNNA1 PE=1 SV=1	CTNNA1	1	0.00164808	73.927	EKQDETQTK(1)IK	3	0.98541	1	0.774	0.811	0.723	1.193	1.172	1.122
Cellular Component	GO:0045121	6	membrane raft	0.1206	Q03135	57	1.523	Up	0.0012176	K	Caveolin-1 OS=Homo sapiens OX=9606 GN=CAV1 PE=1 SV=4	CAV1	1	0.00201216	67.997	DPK(1)HLNDDVVK	3	1.0261	1	0.694	0.781	0.816	1.145	1.139	1.206
Cellular Component	GO:0045121	6	membrane raft	0.1206	P08174	161	4.927	Up	1.8954e-06	K	Complement decay-accelerating factor OS=Homo sapiens OX=9606 GN=CD55 PE=1 SV=4	CD55	1	0.000511591	92.611	K(1)SCPNPGEIR	2	-0.92109	3	0.289	0.285	0.326	1.505	1.493	1.436
Cellular Component	GO:0005793	8	endoplasmic reticulum-Golgi intermediate compartment	0.14518	P53634	162	3.108	Up	0.00042277	K	Dipeptidyl peptidase 1 OS=Homo sapiens OX=9606 GN=CTSC PE=1 SV=2	CTSC	1	0.0014128	98.156	NSQEK(1)YSNR	2	-0.30772	1	0.369	0.439	0.525	1.453	1.385	1.305
Cellular Component	GO:0005793	8	endoplasmic reticulum-Golgi intermediate compartment	0.14518	Q15084	368	1.539	Up	1.70414e-05	K	Protein disulfide-isomerase A6 OS=Homo sapiens OX=9606 GN=PDIA6 PE=1 SV=1	PDIA6	1	0.0107878	97.798	MK(1)FALLK	2	-0.72228	1	0.752	0.78	0.746	1.188	1.148	1.169
Cellular Component	GO:0005793	8	endoplasmic reticulum-Golgi intermediate compartment	0.14518	P09429	90	1.761	Up	0.000121985	K	High mobility group protein B1 OS=Homo sapiens OX=9606 GN=HMGB1 PE=1 SV=3	HMGB1	1	0.014499	80.688	FK(1)DPNAPK	2	-0.291	2	0.677	0.691	0.704	1.289	1.223	1.136
Cellular Component	GO:0005793	8	endoplasmic reticulum-Golgi intermediate compartment	0.14518	P13987	90	2.086	Up	2.1035e-06	K	CD59 glycoprotein OS=Homo sapiens OX=9606 GN=CD59 PE=1 SV=1	CD59	1	3.9152e-08	141.13	ENELTYYCCK(1)K	2	-0.33008	2	0.61	0.612	0.605	1.303	1.29	1.218
Cellular Component	GO:0005793	8	endoplasmic reticulum-Golgi intermediate compartment	0.14518	P13987	66	1.753	Up	0.00061964	K	CD59 glycoprotein OS=Homo sapiens OX=9606 GN=CD59 PE=1 SV=1	CD59	1	4.46545e-17	135.72	CWK(1)FEHCNFNDVTTR	3	-2.6005	1	0.661	0.66	0.756	1.253	1.26	1.128
Cellular Component	GO:0005793	8	endoplasmic reticulum-Golgi intermediate compartment	0.14518	P11021	553	1.584	Up	0.00051646	K	Endoplasmic reticulum chaperone BiP OS=Homo sapiens OX=9606 GN=HSPA5 PE=1 SV=2	HSPA5	1	0.0198462	68.915	FAEEDK(1)K	3	0.25072	1	0.739	0.758	0.737	1.273	1.094	1.171
Cellular Component	GO:0005793	8	endoplasmic reticulum-Golgi intermediate compartment	0.14518	P11021	352	1.593	Up	7.6558e-05	K	Endoplasmic reticulum chaperone BiP OS=Homo sapiens OX=9606 GN=HSPA5 PE=1 SV=2	HSPA5	1	0.000769989	104.22	VLEDSDLK(1)K	3	2.7364	2	0.731	0.73	0.76	1.123	1.214	1.2
Cellular Component	GO:0005793	8	endoplasmic reticulum-Golgi intermediate compartment	0.14518	P08174	161	4.927	Up	1.8954e-06	K	Complement decay-accelerating factor OS=Homo sapiens OX=9606 GN=CD55 PE=1 SV=4	CD55	1	0.000511591	92.611	K(1)SCPNPGEIR	2	-0.92109	3	0.289	0.285	0.326	1.505	1.493	1.436
Cellular Component	GO:0000788	14	nuclear nucleosome	0.0401935	Q99525	17	1.747	Up	0.020535	K	Histone H4-like protein type G OS=Homo sapiens OX=9606 GN=HIST1H4G PE=1 SV=1	HIST1H4G	1	0.00152844	84.31	GLGK(1)GGAK(1)CHR	3	1.0158	1	0.68	0.775	0.62	1.094	0.996	1.535
Cellular Component	GO:0000788	14	nuclear nucleosome	0.0401935	P62805	92	2.182	Up	1.6411e-05	K	Histone H4 OS=Homo sapiens OX=9606 GN=H4C1 PE=1 SV=2	H4C1	1	6.24962e-36	186.16	TVTAMDVVYALK(1)R	2	-0.23684	16	0.562	0.581	0.621	1.289	1.292	1.268
Cellular Component	GO:0000788	14	nuclear nucleosome	0.0401935	P62805	32	1.653	Up	0.0134408	K	Histone H4 OS=Homo sapiens OX=9606 GN=H4C1 PE=1 SV=2	H4C1	1	3.04485e-08	128.68	DNIQGITK(1)PAIR	2	0.4573	2	0.677	0.679	0.809	1.203	1.199	1.177
Cellular Component	GO:0000788	14	nuclear nucleosome	0.0401935	P62805	80	2.391	Up	2.114e-07	K	Histone H4 OS=Homo sapiens OX=9606 GN=H4C1 PE=1 SV=2	H4C1	1	3.87738e-17	153.23	K(1)TVTAMDVVYALK(1)R	3	-0.75923	21	0.556	0.541	0.548	1.342	1.293	1.298
Cellular Component	GO:0000788	14	nuclear nucleosome	0.0401935	P62805	78	1.846	Up	1.73873e-05	K	Histone H4 OS=Homo sapiens OX=9606 GN=H4C1 PE=1 SV=2	H4C1	1	3.72767e-11	151.98	DAVTYTEHAK(1)R	2	0.33428	3	0.693	0.658	0.65	1.26	1.199	1.235
Cellular Component	GO:0000788	14	nuclear nucleosome	0.0401935	P62805	17	1.611	Up	2.4396e-05	K	Histone H4 OS=Homo sapiens OX=9606 GN=H4C1 PE=1 SV=2	H4C1	1	1.37446e-45	190.24	GLGK(1)GGAK(1)R	2	-1.3239	136	0.728	0.747	0.73	1.202	1.136	1.215
Cellular Component	GO:0098857	5	membrane microdomain	0.1206	O94905	287	1.947	Up	0.000141126	K	Erlin-2 OS=Homo sapiens OX=9606 GN=ERLIN2 PE=1 SV=1	ERLIN2	1	0.00766576	78.342	YK(1)AIASNSK	2	0.25171	1	0.588	0.669	0.666	1.295	1.242	1.207
Cellular Component	GO:0098857	5	membrane microdomain	0.1206	P13639	32	1.652	Up	0.0028208	K	Elongation factor 2 OS=Homo sapiens OX=9606 GN=EEF2 PE=1 SV=4	EEF2	1	0.000910029	50.858	NMSVIAHVDHGK(1)STLTDSLVCK	4	-0.77941	1	0.655	0.728	0.777	1.058	1.229	1.282
Cellular Component	GO:0098857	5	membrane microdomain	0.1206	Q96C19	191	1.511	Up	0.0064243	K	EF-hand domain-containing protein D2 OS=Homo sapiens OX=9606 GN=EFHD2 PE=1 SV=1	EFHD2	1	0.00480638	81.017	GAK(1)SFFEAK	2	-0.24747	1	0.812	0.771	0.724	1.17	1.159	1.157
Cellular Component	GO:0098857	5	membrane microdomain	0.1206	Q96C19	226	1.801	Up	1.50441e-05	K	EF-hand domain-containing protein D2 OS=Homo sapiens OX=9606 GN=EFHD2 PE=1 SV=1	EFHD2	1	0.0342552	68.657	QAEEMK(1)QR	2	-1.2691	1	0.651	0.697	0.687	1.213	1.221	1.232
Cellular Component	GO:0098857	5	membrane microdomain	0.1206	P21796	61	1.877	Up	2.673e-06	K	Voltage-dependent anion-selective channel protein 1 OS=Homo sapiens OX=9606 GN=VDAC1 PE=1 SV=2	VDAC1	1	0.00011548	117.25	VTGSLETK(1)YR	3	1.0352	3	0.663	0.636	0.677	1.244	1.244	1.221
Cellular Component	GO:0098857	5	membrane microdomain	0.1206	P21796	20	1.506	Up	6.0692e-05	K	Voltage-dependent anion-selective channel protein 1 OS=Homo sapiens OX=9606 GN=VDAC1 PE=1 SV=2	VDAC1	1	5.63016e-11	131.66	DVFTK(1)GYGFGLIK	2	0.76596	2	0.765	0.794	0.754	1.198	1.157	1.128
Cellular Component	GO:0098857	5	membrane microdomain	0.1206	P35221	881	1.511	Up	0.00040268	K	Catenin alpha-1 OS=Homo sapiens OX=9606 GN=CTNNA1 PE=1 SV=1	CTNNA1	1	0.00164808	73.927	EKQDETQTK(1)IK	3	0.98541	1	0.774	0.811	0.723	1.193	1.172	1.122
Cellular Component	GO:0098857	5	membrane microdomain	0.1206	Q03135	57	1.523	Up	0.0012176	K	Caveolin-1 OS=Homo sapiens OX=9606 GN=CAV1 PE=1 SV=4	CAV1	1	0.00201216	67.997	DPK(1)HLNDDVVK	3	1.0261	1	0.694	0.781	0.816	1.145	1.139	1.206
Cellular Component	GO:0098857	5	membrane microdomain	0.1206	P08174	161	4.927	Up	1.8954e-06	K	Complement decay-accelerating factor OS=Homo sapiens OX=9606 GN=CD55 PE=1 SV=4	CD55	1	0.000511591	92.611	K(1)SCPNPGEIR	2	-0.92109	3	0.289	0.285	0.326	1.505	1.493	1.436
Cellular Component	GO:0043235	3	receptor complex	0.117826	P18564	548	1.991	Up	0.0032991	K	Integrin beta-6 OS=Homo sapiens OX=9606 GN=ITGB6 PE=1 SV=2	ITGB6	1	9.92231e-07	77.037	HK(1)GLLCGGNGDCDCGECVCR	3	-0.47256	1	0.5	0.688	0.699	1.2	1.299	1.258
Cellular Component	GO:0043235	3	receptor complex	0.117826	P23229	144	3.768	Up	1.57151e-05	K	Integrin alpha-6 OS=Homo sapiens OX=9606 GN=ITGA6 PE=1 SV=5	ITGA6	1	3.1719e-06	130.01	QHVNTK(1)QESR	2	1.0391	2	0.354	0.398	0.382	1.474	1.325	1.474
Cellular Component	GO:0043235	3	receptor complex	0.117826	P23229	594	2.852	Up	0.0097615	K	Integrin alpha-6 OS=Homo sapiens OX=9606 GN=ITGA6 PE=1 SV=5	ITGA6	1	0.0014851	102.53	YTQELTLK(1)R	2	0.55207	2	0.382	0.524	0.521	1.331	1.345	1.394
Cellular Component	GO:0043235	3	receptor complex	0.117826	O75197	526	6.771	Up	0.0093419	K	Low-density lipoprotein receptor-related protein 5 OS=Homo sapiens OX=9606 GN=LRP5 PE=1 SV=2	LRP5	1	0.0142367	76.073	TDK(1)IEVINVDGTK	2	2.3659	1	0.196	0.27	0.207	1.517	0.67	2.37
Cellular Component	GO:0043235	3	receptor complex	0.117826	P17301	261	4.97	Up	7.7205e-05	K	Integrin alpha-2 OS=Homo sapiens OX=9606 GN=ITGA2 PE=1 SV=1	ITGA2	1	5.75495e-08	138.89	K(1)YAYSAASGGR	2	-0.52946	1	0.253	0.307	0.334	1.631	1.406	1.406
Cellular Component	GO:0005901	9	caveola	0.345341	P35221	881	1.511	Up	0.00040268	K	Catenin alpha-1 OS=Homo sapiens OX=9606 GN=CTNNA1 PE=1 SV=1	CTNNA1	1	0.00164808	73.927	EKQDETQTK(1)IK	3	0.98541	1	0.774	0.811	0.723	1.193	1.172	1.122
Cellular Component	GO:0005901	9	caveola	0.345341	Q03135	57	1.523	Up	0.0012176	K	Caveolin-1 OS=Homo sapiens OX=9606 GN=CAV1 PE=1 SV=4	CAV1	1	0.00201216	67.997	DPK(1)HLNDDVVK	3	1.0261	1	0.694	0.781	0.816	1.145	1.139	1.206
Cellular Component	GO:0098636	3	protein complex involved in cell adhesion	0.0421578	P18564	548	1.991	Up	0.0032991	K	Integrin beta-6 OS=Homo sapiens OX=9606 GN=ITGB6 PE=1 SV=2	ITGB6	1	9.92231e-07	77.037	HK(1)GLLCGGNGDCDCGECVCR	3	-0.47256	1	0.5	0.688	0.699	1.2	1.299	1.258
Cellular Component	GO:0098636	3	protein complex involved in cell adhesion	0.0421578	P23229	144	3.768	Up	1.57151e-05	K	Integrin alpha-6 OS=Homo sapiens OX=9606 GN=ITGA6 PE=1 SV=5	ITGA6	1	3.1719e-06	130.01	QHVNTK(1)QESR	2	1.0391	2	0.354	0.398	0.382	1.474	1.325	1.474
Cellular Component	GO:0098636	3	protein complex involved in cell adhesion	0.0421578	P23229	594	2.852	Up	0.0097615	K	Integrin alpha-6 OS=Homo sapiens OX=9606 GN=ITGA6 PE=1 SV=5	ITGA6	1	0.0014851	102.53	YTQELTLK(1)R	2	0.55207	2	0.382	0.524	0.521	1.331	1.345	1.394
Cellular Component	GO:0098636	3	protein complex involved in cell adhesion	0.0421578	P17301	261	4.97	Up	7.7205e-05	K	Integrin alpha-2 OS=Homo sapiens OX=9606 GN=ITGA2 PE=1 SV=1	ITGA2	1	5.75495e-08	138.89	K(1)YAYSAASGGR	2	-0.52946	1	0.253	0.307	0.334	1.631	1.406	1.406
Cellular Component	GO:0005615	4	extracellular space	0.00181019	P04075	200	1.909	Up	0.00039957	K	Fructose-bisphosphate aldolase A OS=Homo sapiens OX=9606 GN=ALDOA PE=1 SV=2	ALDOA	1	1.06057e-28	125	YASICQQNGIVPIVEPEILPDGDHDLK(1)R	3	-1.6772	8	0.693	0.577	0.681	1.214	1.249	1.262
Cellular Component	GO:0005615	4	extracellular space	0.00181019	P04075	108	1.531	Up	0.00098334	K	Fructose-bisphosphate aldolase A OS=Homo sapiens OX=9606 GN=ALDOA PE=1 SV=2	ALDOA	1	0.000445929	92.866	GGVVGIK(1)VDK	2	0.15856	1	0.727	0.722	0.837	1.193	1.157	1.149
Cellular Component	GO:0005615	4	extracellular space	0.00181019	Q5T655	464	2.834	Up	4.2798e-05	K	Cilia- and flagella-associated protein 58 OS=Homo sapiens OX=9606 GN=CFAP58 PE=1 SV=1	CFAP58	1	0.0200535	42.976	VLMNMEDIK(1)VR	2	-3.7947	1	0.503	0.48	0.456	1.456	1.381	1.241
Cellular Component	GO:0005615	4	extracellular space	0.00181019	Q16531	191	1.804	Up	3.8213e-05	K	DNA damage-binding protein 1 OS=Homo sapiens OX=9606 GN=DDB1 PE=1 SV=1	DDB1	1	5.7889e-05	94.363	HVK(1)TYEVSLR	3	-1.2231	2	0.644	0.677	0.712	1.233	1.223	1.211
Cellular Component	GO:0005615	4	extracellular space	0.00181019	O75487	44	1.652	Up	4.6607e-06	K	Glypican-4 OS=Homo sapiens OX=9606 GN=GPC4 PE=1 SV=4	GPC4	1	1.65724e-10	118.72	GFNK(1)NDAPLHEINGDHLK	4	0.22408	2	0.727	0.708	0.733	1.228	1.179	1.174
Cellular Component	GO:0005615	4	extracellular space	0.00181019	O43707	779	1.506	Up	4.621e-06	K	Alpha-actinin-4 OS=Homo sapiens OX=9606 GN=ACTN4 PE=1 SV=2	ACTN4	1	2.1119e-07	92.098	ASFNHFDK(1)DHGGALGPEEFK	4	-0.48137	1	0.769	0.755	0.788	1.156	1.148	1.177
Cellular Component	GO:0005615	4	extracellular space	0.00181019	P02766	96	4.64	Up	1.0218e-07	K	Transthyretin OS=Homo sapiens OX=9606 GN=TTR PE=1 SV=1	TTR	1	9.62145e-21	174.24	VEIDTK(1)SYWK	2	0.52001	2	0.318	0.326	0.304	1.477	1.456	1.466
Cellular Component	GO:0005615	4	extracellular space	0.00181019	P53621	825	1.699	Up	0.00089537	K	Coatomer subunit alpha OS=Homo sapiens OX=9606 GN=COPA PE=1 SV=2	COPA	1	0.000275955	86.114	GFFEGTIASK(1)GK	3	-0.25695	1	0.74	0.742	0.642	1.245	1.118	1.246
Cellular Component	GO:0005615	4	extracellular space	0.00181019	P02753	107	1.841	Up	6.0848e-05	K	Retinol-binding protein 4 OS=Homo sapiens OX=9606 GN=RBP4 PE=1 SV=3	RBP4	1	0.000780174	73.881	MK(1)YWGVASFLQK	3	-0.60003	1	0.627	0.685	0.692	1.249	1.248	1.193
Cellular Component	GO:0005615	4	extracellular space	0.00181019	P30041	215	1.533	Up	0.000142773	K	Peroxiredoxin-6 OS=Homo sapiens OX=9606 GN=PRDX6 PE=1 SV=3	PRDX6	1	0.0237747	81.296	ELPSGK(1)K	3	-1.5292	2	0.803	0.738	0.744	1.195	1.168	1.139
Cellular Component	GO:0005615	4	extracellular space	0.00181019	P09429	90	1.761	Up	0.000121985	K	High mobility group protein B1 OS=Homo sapiens OX=9606 GN=HMGB1 PE=1 SV=3	HMGB1	1	0.014499	80.688	FK(1)DPNAPK	2	-0.291	2	0.677	0.691	0.704	1.289	1.223	1.136
Cellular Component	GO:0005615	4	extracellular space	0.00181019	P63261	50	2.044	Up	0.00151871	K	Actin, cytoplasmic 2 OS=Homo sapiens OX=9606 GN=ACTG1 PE=1 SV=1	ACTG1	1	1.73645e-08	74.364	HQGVMVGMGQK(1)DSYVGDEAQSK	3	-0.91047	1	0.53	0.605	0.719	1.328	1.267	1.194
Cellular Component	GO:0005615	4	extracellular space	0.00181019	P02458	1444	3.469	Up	1.93387e-05	K	Collagen alpha-1(II) chain OS=Homo sapiens OX=9606 GN=COL2A1 PE=1 SV=3	COL2A1	1	0.014601	68.915	HTGK(1)WGK	3	-0.79413	1	0.434	0.395	0.388	1.483	1.302	1.437
Cellular Component	GO:0005615	4	extracellular space	0.00181019	P53634	162	3.108	Up	0.00042277	K	Dipeptidyl peptidase 1 OS=Homo sapiens OX=9606 GN=CTSC PE=1 SV=2	CTSC	1	0.0014128	98.156	NSQEK(1)YSNR	2	-0.30772	1	0.369	0.439	0.525	1.453	1.385	1.305
Cellular Component	GO:0005615	4	extracellular space	0.00181019	P15692	149	1.52	Up	0.0183197	K	Vascular endothelial growth factor A OS=Homo sapiens OX=9606 GN=VEGFA PE=1 SV=2	VEGFA	1	0.0158118	68.016	GK(1)GK(1)GQK(1)R	3	0.20842	1	0.619	0.836	0.835	1.054	1.197	1.23
Cellular Component	GO:0005615	4	extracellular space	0.00181019	P15692	147	1.52	Up	0.0183197	K	Vascular endothelial growth factor A OS=Homo sapiens OX=9606 GN=VEGFA PE=1 SV=2	VEGFA	1	0.0158118	68.016	GK(1)GK(1)GQK(1)R	3	0.20842	1	0.619	0.836	0.835	1.054	1.197	1.23
Cellular Component	GO:0005615	4	extracellular space	0.00181019	P15692	152	1.52	Up	0.0183197	K	Vascular endothelial growth factor A OS=Homo sapiens OX=9606 GN=VEGFA PE=1 SV=2	VEGFA	1	0.0158118	68.016	GK(1)GK(1)GQK(1)R	3	0.20842	1	0.619	0.836	0.835	1.054	1.197	1.23
Cellular Component	GO:0005615	4	extracellular space	0.00181019	P23528	92	1.643	Up	3.7006e-05	K	Cofilin-1 OS=Homo sapiens OX=9606 GN=CFL1 PE=1 SV=3	CFL1	1	1.70741e-10	121.99	YALYDATYETK(1)ESK	2	0.88008	2	0.714	0.743	0.716	1.144	1.227	1.2
Cellular Component	GO:0005615	4	extracellular space	0.00181019	P00740	446	2.291	Up	0.0032782	K	Coagulation factor IX OS=Homo sapiens OX=9606 GN=F9 PE=1 SV=2	F9	1	0.00440376	82.008	YGIYTK(1)VSR	2	-0.90947	1	0.619	0.527	0.554	1.289	1.3	1.305
Cellular Component	GO:0005615	4	extracellular space	0.00181019	P13726	233	2.168	Up	0.00033987	K	Tissue factor OS=Homo sapiens OX=9606 GN=F3 PE=1 SV=1	F3	1	2.77667e-05	95.57	K(1)STDSPVECMGQEK	3	2.065	1	0.588	0.527	0.659	1.34	1.252	1.254
Cellular Component	GO:0005615	4	extracellular space	0.00181019	P02765	225	2.633	Up	1.9636e-06	K	Alpha-2-HS-glycoprotein OS=Homo sapiens OX=9606 GN=AHSG PE=1 SV=2	AHSG	1	1.71027e-17	156.24	CNLLAEK(1)QYGFCK	3	-0.271	5	0.509	0.493	0.523	1.376	1.357	1.282
Cellular Component	GO:0005615	4	extracellular space	0.00181019	P02749	303	21.341	Up	4.0011e-06	K	Beta-2-glycoprotein 1 OS=Homo sapiens OX=9606 GN=APOH PE=1 SV=3	APOH	1	7.12912e-09	145.31	VSFFCK(1)NK(1)EK	2	-0.45882	1	0.064	0.074	0.091	1.696	1.57	1.621
Cellular Component	GO:0005615	4	extracellular space	0.00181019	P02749	301	6.988	Up	4.3035e-08	K	Beta-2-glycoprotein 1 OS=Homo sapiens OX=9606 GN=APOH PE=1 SV=3	APOH	1	7.12912e-09	145.31	VSFFCK(1)NK(1)EK	2	-0.45882	7	0.214	0.222	0.222	1.585	1.496	1.517
Cellular Component	GO:0005615	4	extracellular space	0.00181019	P62195	330	2.306	Up	0.0105445	K	26S proteasome regulatory subunit 8 OS=Homo sapiens OX=9606 GN=PSMC5 PE=1 SV=1	PSMC5	1	0.006593	64.82	LDILK(1)IHSR	3	-0.7783	1	0.602	0.591	0.492	0.932	1.66	1.293
Cellular Component	GO:0005615	4	extracellular space	0.00181019	P15291	348	1.811	Up	0.0005237	K	Beta-1,4-galactosyltransferase 1 OS=Homo sapiens OX=9606 GN=B4GALT1 PE=1 SV=5	B4GALT1	1	0.0295481	72.23	K(1)NEPNPQR	2	0.42742	1	0.751	0.632	0.648	1.279	1.22	1.18
Cellular Component	GO:0005615	4	extracellular space	0.00181019	Q14520	173	6.547	Up	3.9393e-06	K	Hyaluronan-binding protein 2 OS=Homo sapiens OX=9606 GN=HABP2 PE=1 SV=1	HABP2	1	4.04891e-11	145.43	SK(1)FTCACPDQFK	3	0.39348	2	0.211	0.229	0.258	1.592	1.456	1.522
Cellular Component	GO:0005615	4	extracellular space	0.00181019	P13987	90	2.086	Up	2.1035e-06	K	CD59 glycoprotein OS=Homo sapiens OX=9606 GN=CD59 PE=1 SV=1	CD59	1	3.9152e-08	141.13	ENELTYYCCK(1)K	2	-0.33008	2	0.61	0.612	0.605	1.303	1.29	1.218
Cellular Component	GO:0005615	4	extracellular space	0.00181019	P13987	66	1.753	Up	0.00061964	K	CD59 glycoprotein OS=Homo sapiens OX=9606 GN=CD59 PE=1 SV=1	CD59	1	4.46545e-17	135.72	CWK(1)FEHCNFNDVTTR	3	-2.6005	1	0.661	0.66	0.756	1.253	1.26	1.128
Cellular Component	GO:0005615	4	extracellular space	0.00181019	Q15063	676	1.528	Up	0.00066247	K	Periostin OS=Homo sapiens OX=9606 GN=POSTN PE=1 SV=2	POSTN	1	0.00277252	88.596	IITK(1)VVEPK	2	-0.2033	1	0.802	0.784	0.702	1.127	1.19	1.178
Cellular Component	GO:0005615	4	extracellular space	0.00181019	P26583	3	2.956	Up	1.481e-06	K	High mobility group protein B2 OS=Homo sapiens OX=9606 GN=HMGB2 PE=1 SV=2	HMGB2	0.999989	0.00434355	72.928	GK(1)GDPNKPR	3	-2.3564	2	0.457	0.487	0.444	1.378	1.343	1.382
Cellular Component	GO:0005615	4	extracellular space	0.00181019	Q4V328	230	1.993	Up	2.4653e-05	K	GRIP1-associated protein 1 OS=Homo sapiens OX=9606 GN=GRIPAP1 PE=1 SV=2	GRIPAP1	1	0.00135038	86.772	LQEELAK(1)LSEK	3	-0.18655	2	0.659	0.631	0.6	1.287	1.212	1.268
Cellular Component	GO:0005615	4	extracellular space	0.00181019	P18065	207	5.699	Up	4.9835e-07	K	Insulin-like growth factor-binding protein 2 OS=Homo sapiens OX=9606 GN=IGFBP2 PE=1 SV=2	IGFBP2	1	0.00370776	54.343	GGK(1)HHLGLEEPK	4	0.020273	1	0.27	0.255	0.265	1.49	1.426	1.586
Cellular Component	GO:0005615	4	extracellular space	0.00181019	P18065	216	5.711	Up	2.5698e-06	K	Insulin-like growth factor-binding protein 2 OS=Homo sapiens OX=9606 GN=IGFBP2 PE=1 SV=2	IGFBP2	1	0.000564305	85.676	HHLGLEEPK(1)K	4	-0.036363	1	0.289	0.25	0.25	1.503	1.444	1.559
Cellular Component	GO:0005615	4	extracellular space	0.00181019	P24043	3092	1.918	Up	1.50302e-05	K	Laminin subunit alpha-2 OS=Homo sapiens OX=9606 GN=LAMA2 PE=1 SV=4	LAMA2	1	0.0350388	67.385	GCIRSLK(1)LTK	2	3.4243	1	0.661	0.626	0.658	1.283	1.221	1.227
Cellular Component	GO:0030426	6	growth cone	0.112577	Q9UPX8	1174	1.904	Up	0.00047943	K	SH3 and multiple ankyrin repeat domains protein 2 OS=Homo sapiens OX=9606 GN=SHANK2 PE=1 SV=3	SHANK2	1	0.0255254	57.281	MK(1)PIIHK	3	-3.76	1	0.718	0.65	0.589	1.296	1.239	1.192
Cellular Component	GO:0030426	6	growth cone	0.112577	P35580	1782	1.618	Up	0.00133836	K	Myosin-10 OS=Homo sapiens OX=9606 GN=MYH10 PE=1 SV=3	MYH10	1	0.000848405	90.614	SAAQK(1)SDNAR	2	-0.18483	1	0.811	0.675	0.713	1.145	1.249	1.164
Cellular Component	GO:0030426	6	growth cone	0.112577	P23528	92	1.643	Up	3.7006e-05	K	Cofilin-1 OS=Homo sapiens OX=9606 GN=CFL1 PE=1 SV=3	CFL1	1	1.70741e-10	121.99	YALYDATYETK(1)ESK	2	0.88008	2	0.714	0.743	0.716	1.144	1.227	1.2
Cellular Component	GO:0030426	6	growth cone	0.112577	P07196	128	1.516	Up	0.0130616	K	Neurofilament light polypeptide OS=Homo sapiens OX=9606 GN=NEFL PE=1 SV=3	NEFL	1	0.0426312	41.448	QK(1)HSEPSR	3	0.068112	1	0.63	0.85	0.819	1.199	1.198	1.089
Cellular Component	GO:0030426	6	growth cone	0.112577	Q13009	564	2.554	Up	2.264e-05	K	T-lymphoma invasion and metastasis-inducing protein 1 OS=Homo sapiens OX=9606 GN=TIAM1 PE=1 SV=2	TIAM1	1	0.00536023	86.794	LLK(1)SEIK	3	-0.69534	1	0.501	0.52	0.54	1.387	1.234	1.366
Cellular Component	GO:0030426	6	growth cone	0.112577	Q7L576	1188	1.882	Up	5.6212e-05	K	Cytoplasmic FMR1-interacting protein 1 OS=Homo sapiens OX=9606 GN=CYFIP1 PE=1 SV=1	CYFIP1	0.999952	0.000231257	89.231	VQK(1)HDGKDEIIK	4	-1.3205	2	0.634	0.688	0.65	1.296	1.192	1.224
Cellular Component	GO:0031233	8	intrinsic component of external side of plasma membrane	0.0401935	P13726	233	2.168	Up	0.00033987	K	Tissue factor OS=Homo sapiens OX=9606 GN=F3 PE=1 SV=1	F3	1	2.77667e-05	95.57	K(1)STDSPVECMGQEK	3	2.065	1	0.588	0.527	0.659	1.34	1.252	1.254
Cellular Component	GO:0031233	8	intrinsic component of external side of plasma membrane	0.0401935	P13987	90	2.086	Up	2.1035e-06	K	CD59 glycoprotein OS=Homo sapiens OX=9606 GN=CD59 PE=1 SV=1	CD59	1	3.9152e-08	141.13	ENELTYYCCK(1)K	2	-0.33008	2	0.61	0.612	0.605	1.303	1.29	1.218
Cellular Component	GO:0031233	8	intrinsic component of external side of plasma membrane	0.0401935	P13987	66	1.753	Up	0.00061964	K	CD59 glycoprotein OS=Homo sapiens OX=9606 GN=CD59 PE=1 SV=1	CD59	1	4.46545e-17	135.72	CWK(1)FEHCNFNDVTTR	3	-2.6005	1	0.661	0.66	0.756	1.253	1.26	1.128
Cellular Component	GO:0044456	3	synapse part	0.0174181	P17174	97	1.571	Up	0.0062823	K	Aspartate aminotransferase, cytoplasmic OS=Homo sapiens OX=9606 GN=GOT1 PE=1 SV=3	GOT1	1	0.000526115	69.03	LALGDDSPALK(1)EK	3	4.0464	1	0.768	0.717	0.76	1.092	1.374	1.06
Cellular Component	GO:0044456	3	synapse part	0.0174181	Q9UPX8	1174	1.904	Up	0.00047943	K	SH3 and multiple ankyrin repeat domains protein 2 OS=Homo sapiens OX=9606 GN=SHANK2 PE=1 SV=3	SHANK2	1	0.0255254	57.281	MK(1)PIIHK	3	-3.76	1	0.718	0.65	0.589	1.296	1.239	1.192
Cellular Component	GO:0044456	3	synapse part	0.0174181	P35580	1782	1.618	Up	0.00133836	K	Myosin-10 OS=Homo sapiens OX=9606 GN=MYH10 PE=1 SV=3	MYH10	1	0.000848405	90.614	SAAQK(1)SDNAR	2	-0.18483	1	0.811	0.675	0.713	1.145	1.249	1.164
Cellular Component	GO:0044456	3	synapse part	0.0174181	P23528	92	1.643	Up	3.7006e-05	K	Cofilin-1 OS=Homo sapiens OX=9606 GN=CFL1 PE=1 SV=3	CFL1	1	1.70741e-10	121.99	YALYDATYETK(1)ESK	2	0.88008	2	0.714	0.743	0.716	1.144	1.227	1.2
Cellular Component	GO:0044456	3	synapse part	0.0174181	P62195	330	2.306	Up	0.0105445	K	26S proteasome regulatory subunit 8 OS=Homo sapiens OX=9606 GN=PSMC5 PE=1 SV=1	PSMC5	1	0.006593	64.82	LDILK(1)IHSR	3	-0.7783	1	0.602	0.591	0.492	0.932	1.66	1.293
Cellular Component	GO:0044456	3	synapse part	0.0174181	P21796	61	1.877	Up	2.673e-06	K	Voltage-dependent anion-selective channel protein 1 OS=Homo sapiens OX=9606 GN=VDAC1 PE=1 SV=2	VDAC1	1	0.00011548	117.25	VTGSLETK(1)YR	3	1.0352	3	0.663	0.636	0.677	1.244	1.244	1.221
Cellular Component	GO:0044456	3	synapse part	0.0174181	P21796	20	1.506	Up	6.0692e-05	K	Voltage-dependent anion-selective channel protein 1 OS=Homo sapiens OX=9606 GN=VDAC1 PE=1 SV=2	VDAC1	1	5.63016e-11	131.66	DVFTK(1)GYGFGLIK	2	0.76596	2	0.765	0.794	0.754	1.198	1.157	1.128
Cellular Component	GO:0044456	3	synapse part	0.0174181	Q7L576	1188	1.882	Up	5.6212e-05	K	Cytoplasmic FMR1-interacting protein 1 OS=Homo sapiens OX=9606 GN=CYFIP1 PE=1 SV=1	CYFIP1	0.999952	0.000231257	89.231	VQK(1)HDGKDEIIK	4	-1.3205	2	0.634	0.688	0.65	1.296	1.192	1.224
Cellular Component	GO:0044456	3	synapse part	0.0174181	Q9NRD5	88	2.812	Up	3.5799e-06	K	PRKCA-binding protein OS=Homo sapiens OX=9606 GN=PICK1 PE=1 SV=2	PICK1	1	0.0229749	55.261	VEVAK(1)MIQEVK	2	0.85616	1	0.484	0.504	0.458	1.401	1.307	1.358
Cellular Component	GO:0044456	3	synapse part	0.0174181	P27824	87	1.514	Up	0.00095527	K	Calnexin OS=Homo sapiens OX=9606 GN=CANX PE=1 SV=2	CANX	1	0.014782	46.88	GTLSGWILSK(1)AK	3	-0.67335	1	0.807	0.786	0.712	1.226	1.112	1.152
Cellular Component	GO:0044456	3	synapse part	0.0174181	Q4V328	230	1.993	Up	2.4653e-05	K	GRIP1-associated protein 1 OS=Homo sapiens OX=9606 GN=GRIPAP1 PE=1 SV=2	GRIPAP1	1	0.00135038	86.772	LQEELAK(1)LSEK	3	-0.18655	2	0.659	0.631	0.6	1.287	1.212	1.268
Cellular Component	GO:0044456	3	synapse part	0.0174181	Q13009	564	2.554	Up	2.264e-05	K	T-lymphoma invasion and metastasis-inducing protein 1 OS=Homo sapiens OX=9606 GN=TIAM1 PE=1 SV=2	TIAM1	1	0.00536023	86.794	LLK(1)SEIK	3	-0.69534	1	0.501	0.52	0.54	1.387	1.234	1.366
Cellular Component	GO:0044456	3	synapse part	0.0174181	P24043	3092	1.918	Up	1.50302e-05	K	Laminin subunit alpha-2 OS=Homo sapiens OX=9606 GN=LAMA2 PE=1 SV=4	LAMA2	1	0.0350388	67.385	GCIRSLK(1)LTK	2	3.4243	1	0.661	0.626	0.658	1.283	1.221	1.227
Cellular Component	GO:0044456	3	synapse part	0.0174181	Q14247	161	1.788	Up	3.79e-05	K	Src substrate cortactin OS=Homo sapiens OX=9606 GN=CTTN PE=1 SV=2	CTTN	1	5.64477e-17	133.78	DYSSGFGGK(1)YGVQADR	2	0.1629	2	0.677	0.659	0.712	1.252	1.23	1.179
Cellular Component	GO:0044456	3	synapse part	0.0174181	Q14247	198	1.588	Up	0.00024373	K	Src substrate cortactin OS=Homo sapiens OX=9606 GN=CTTN PE=1 SV=2	CTTN	1	6.55628e-07	113.24	GFGGK(1)YGIDK	3	-0.15514	2	0.734	0.77	0.724	1.251	1.119	1.169
Cellular Component	GO:0044456	3	synapse part	0.0174181	P17301	261	4.97	Up	7.7205e-05	K	Integrin alpha-2 OS=Homo sapiens OX=9606 GN=ITGA2 PE=1 SV=1	ITGA2	1	5.75495e-08	138.89	K(1)YAYSAASGGR	2	-0.52946	1	0.253	0.307	0.334	1.631	1.406	1.406
Cellular Component	GO:0098573	13	intrinsic component of mitochondrial membrane	0.138441	Q9NX63	173	1.607	Up	2.6912e-07	K	MICOS complex subunit MIC19 OS=Homo sapiens OX=9606 GN=CHCHD3 PE=1 SV=1	CHCHD3	1	0.000353452	107.06	AAEEVEAK(1)FK	3	0.05199	2	0.732	0.744	0.733	1.173	1.179	1.198
Cellular Component	GO:0098573	13	intrinsic component of mitochondrial membrane	0.138441	Q9NX63	45	7.858	Up	1.602e-05	K	MICOS complex subunit MIC19 OS=Homo sapiens OX=9606 GN=CHCHD3 PE=1 SV=1	CHCHD3	1	3.73343e-07	132.5	ESSPSGSK(1)SQR	2	0.84753	1	0.18	0.184	0.227	1.612	1.552	1.48
Cellular Component	GO:0098573	13	intrinsic component of mitochondrial membrane	0.138441	Q16891	102	2.142	Up	0.000164333	K	MICOS complex subunit MIC60 OS=Homo sapiens OX=9606 GN=IMMT PE=1 SV=1	IMMT	1	0.00406596	74.841	K(1)SIQSGPLK	3	0.37176	2	0.589	0.646	0.554	1.229	1.365	1.238
Cellular Component	GO:0098573	13	intrinsic component of mitochondrial membrane	0.138441	Q9BRQ6	114	2.999	Up	0.00020123	K	MICOS complex subunit MIC25 OS=Homo sapiens OX=9606 GN=CHCHD6 PE=1 SV=1	CHCHD6	1	0.00655234	74.301	EAATK(1)HSK	3	1.3693	1	0.495	0.401	0.479	1.488	1.397	1.239
Cellular Component	GO:0033116	9	endoplasmic reticulum-Golgi intermediate compartment membrane	0.138441	P53634	162	3.108	Up	0.00042277	K	Dipeptidyl peptidase 1 OS=Homo sapiens OX=9606 GN=CTSC PE=1 SV=2	CTSC	1	0.0014128	98.156	NSQEK(1)YSNR	2	-0.30772	1	0.369	0.439	0.525	1.453	1.385	1.305
Cellular Component	GO:0033116	9	endoplasmic reticulum-Golgi intermediate compartment membrane	0.138441	P13987	90	2.086	Up	2.1035e-06	K	CD59 glycoprotein OS=Homo sapiens OX=9606 GN=CD59 PE=1 SV=1	CD59	1	3.9152e-08	141.13	ENELTYYCCK(1)K	2	-0.33008	2	0.61	0.612	0.605	1.303	1.29	1.218
Cellular Component	GO:0033116	9	endoplasmic reticulum-Golgi intermediate compartment membrane	0.138441	P13987	66	1.753	Up	0.00061964	K	CD59 glycoprotein OS=Homo sapiens OX=9606 GN=CD59 PE=1 SV=1	CD59	1	4.46545e-17	135.72	CWK(1)FEHCNFNDVTTR	3	-2.6005	1	0.661	0.66	0.756	1.253	1.26	1.128
Cellular Component	GO:0033116	9	endoplasmic reticulum-Golgi intermediate compartment membrane	0.138441	P08174	161	4.927	Up	1.8954e-06	K	Complement decay-accelerating factor OS=Homo sapiens OX=9606 GN=CD55 PE=1 SV=4	CD55	1	0.000511591	92.611	K(1)SCPNPGEIR	2	-0.92109	3	0.289	0.285	0.326	1.505	1.493	1.436
Cellular Component	GO:1902495	6	transmembrane transporter complex	0.0971656	Q9Y696	146	1.747	Up	0.000158095	K	Chloride intracellular channel protein 4 OS=Homo sapiens OX=9606 GN=CLIC4 PE=1 SV=4	CLIC4	1	0.00711757	91.867	GLLK(1)TLQK	2	0.55617	1	0.693	0.685	0.705	1.273	1.121	1.245
Cellular Component	GO:1902495	6	transmembrane transporter complex	0.0971656	Q12797	336	1.771	Up	0.0099388	K	Aspartyl/asparaginyl beta-hydroxylase OS=Homo sapiens OX=9606 GN=ASPH PE=1 SV=3	ASPH	1	0.0197409	87.476	LLNK(1)FDK	2	2.2137	1	0.759	0.622	0.682	1.221	1.227	1.206
Cellular Component	GO:1902495	6	transmembrane transporter complex	0.0971656	P47985	101	1.523	Up	0.031261	K	Cytochrome b-c1 complex subunit Rieske, mitochondrial OS=Homo sapiens OX=9606 GN=UQCRFS1 PE=1 SV=2	UQCRFS1	1	0.00038399	92.99	LEVLDSTK(1)SSR	2	-1.559	1	0.714	0.657	0.922	1.111	1.353	1.029
Cellular Component	GO:1902495	6	transmembrane transporter complex	0.0971656	Q14247	161	1.788	Up	3.79e-05	K	Src substrate cortactin OS=Homo sapiens OX=9606 GN=CTTN PE=1 SV=2	CTTN	1	5.64477e-17	133.78	DYSSGFGGK(1)YGVQADR	2	0.1629	2	0.677	0.659	0.712	1.252	1.23	1.179
Cellular Component	GO:1902495	6	transmembrane transporter complex	0.0971656	Q14247	198	1.588	Up	0.00024373	K	Src substrate cortactin OS=Homo sapiens OX=9606 GN=CTTN PE=1 SV=2	CTTN	1	6.55628e-07	113.24	GFGGK(1)YGIDK	3	-0.15514	2	0.734	0.77	0.724	1.251	1.119	1.169
Cellular Component	GO:0005604	6	basement membrane	0.02421	P23229	144	3.768	Up	1.57151e-05	K	Integrin alpha-6 OS=Homo sapiens OX=9606 GN=ITGA6 PE=1 SV=5	ITGA6	1	3.1719e-06	130.01	QHVNTK(1)QESR	2	1.0391	2	0.354	0.398	0.382	1.474	1.325	1.474
Cellular Component	GO:0005604	6	basement membrane	0.02421	P23229	594	2.852	Up	0.0097615	K	Integrin alpha-6 OS=Homo sapiens OX=9606 GN=ITGA6 PE=1 SV=5	ITGA6	1	0.0014851	102.53	YTQELTLK(1)R	2	0.55207	2	0.382	0.524	0.521	1.331	1.345	1.394
Cellular Component	GO:0005604	6	basement membrane	0.02421	P24043	3092	1.918	Up	1.50302e-05	K	Laminin subunit alpha-2 OS=Homo sapiens OX=9606 GN=LAMA2 PE=1 SV=4	LAMA2	1	0.0350388	67.385	GCIRSLK(1)LTK	2	3.4243	1	0.661	0.626	0.658	1.283	1.221	1.227
Cellular Component	GO:0005604	6	basement membrane	0.02421	Q16787	2135	1.622	Up	3.461e-06	K	Laminin subunit alpha-3 OS=Homo sapiens OX=9606 GN=LAMA3 PE=1 SV=2	LAMA3	1	0.000133898	89.507	SAGK(1)TSLVEEAEK	2	-0.15811	2	0.721	0.727	0.746	1.166	1.178	1.214
Cellular Component	GO:0005604	6	basement membrane	0.02421	P02458	1444	3.469	Up	1.93387e-05	K	Collagen alpha-1(II) chain OS=Homo sapiens OX=9606 GN=COL2A1 PE=1 SV=3	COL2A1	1	0.014601	68.915	HTGK(1)WGK	3	-0.79413	1	0.434	0.395	0.388	1.483	1.302	1.437
Cellular Component	GO:0031902	12	late endosome membrane	0.110097	Q9H444	14	1.582	Up	0.0041192	K	Charged multivesicular body protein 4b OS=Homo sapiens OX=9606 GN=CHMP4B PE=1 SV=1	CHMP4B	1	3.09123e-05	113.93	LFGAGGGK(1)AGK	3	-0.24622	2	0.803	0.777	0.655	1.145	1.286	1.105
Cellular Component	GO:0031902	12	late endosome membrane	0.110097	O95858	150	3.044	Up	4.4605e-08	K	Tetraspanin-15 OS=Homo sapiens OX=9606 GN=TSPAN15 PE=1 SV=1	TSPAN15	1	0.000671673	121.9	NIMDFVQK(1)K	2	-0.46164	1	0.453	0.46	0.442	1.365	1.376	1.384
Cellular Component	GO:0031902	12	late endosome membrane	0.110097	Q96GA3	453	3.465	Up	4.4219e-05	K	Protein LTV1 homolog OS=Homo sapiens OX=9606 GN=LTV1 PE=1 SV=1	LTV1	1	0.0151652	64.121	ANK(1)LAFK(1)LEK	2	0.14049	1	0.392	0.458	0.367	1.39	1.44	1.387
Cellular Component	GO:0031902	12	late endosome membrane	0.110097	Q96GA3	449	3.465	Up	4.4219e-05	K	Protein LTV1 homolog OS=Homo sapiens OX=9606 GN=LTV1 PE=1 SV=1	LTV1	1	0.0151652	64.121	ANK(1)LAFK(1)LEK	2	0.14049	1	0.392	0.458	0.367	1.39	1.44	1.387
Cellular Component	GO:0030175	6	filopodium	0.243116	P23528	92	1.643	Up	3.7006e-05	K	Cofilin-1 OS=Homo sapiens OX=9606 GN=CFL1 PE=1 SV=3	CFL1	1	1.70741e-10	121.99	YALYDATYETK(1)ESK	2	0.88008	2	0.714	0.743	0.716	1.144	1.227	1.2
Cellular Component	GO:0030175	6	filopodium	0.243116	P23229	144	3.768	Up	1.57151e-05	K	Integrin alpha-6 OS=Homo sapiens OX=9606 GN=ITGA6 PE=1 SV=5	ITGA6	1	3.1719e-06	130.01	QHVNTK(1)QESR	2	1.0391	2	0.354	0.398	0.382	1.474	1.325	1.474
Cellular Component	GO:0030175	6	filopodium	0.243116	P23229	594	2.852	Up	0.0097615	K	Integrin alpha-6 OS=Homo sapiens OX=9606 GN=ITGA6 PE=1 SV=5	ITGA6	1	0.0014851	102.53	YTQELTLK(1)R	2	0.55207	2	0.382	0.524	0.521	1.331	1.345	1.394
Cellular Component	GO:0030175	6	filopodium	0.243116	P15291	348	1.811	Up	0.0005237	K	Beta-1,4-galactosyltransferase 1 OS=Homo sapiens OX=9606 GN=B4GALT1 PE=1 SV=5	B4GALT1	1	0.0295481	72.23	K(1)NEPNPQR	2	0.42742	1	0.751	0.632	0.648	1.279	1.22	1.18
Cellular Component	GO:0030175	6	filopodium	0.243116	Q7L576	1188	1.882	Up	5.6212e-05	K	Cytoplasmic FMR1-interacting protein 1 OS=Homo sapiens OX=9606 GN=CYFIP1 PE=1 SV=1	CYFIP1	0.999952	0.000231257	89.231	VQK(1)HDGKDEIIK	4	-1.3205	2	0.634	0.688	0.65	1.296	1.192	1.224
Cellular Component	GO:0030055	3	cell-substrate junction	0.00206293	P18124	223	1.556	Up	0.00049647	K	60S ribosomal protein L7 OS=Homo sapiens OX=9606 GN=RPL7 PE=1 SV=1	RPL7	1	2.59475e-29	179.94	K(1)TTHFVEGGDAGNREDQINR	3	-0.098351	4	0.789	0.778	0.693	1.183	1.144	1.19
Cellular Component	GO:0030055	3	cell-substrate junction	0.00206293	P23229	144	3.768	Up	1.57151e-05	K	Integrin alpha-6 OS=Homo sapiens OX=9606 GN=ITGA6 PE=1 SV=5	ITGA6	1	3.1719e-06	130.01	QHVNTK(1)QESR	2	1.0391	2	0.354	0.398	0.382	1.474	1.325	1.474
Cellular Component	GO:0030055	3	cell-substrate junction	0.00206293	P23229	594	2.852	Up	0.0097615	K	Integrin alpha-6 OS=Homo sapiens OX=9606 GN=ITGA6 PE=1 SV=5	ITGA6	1	0.0014851	102.53	YTQELTLK(1)R	2	0.55207	2	0.382	0.524	0.521	1.331	1.345	1.394
Cellular Component	GO:0030055	3	cell-substrate junction	0.00206293	Q7L576	1188	1.882	Up	5.6212e-05	K	Cytoplasmic FMR1-interacting protein 1 OS=Homo sapiens OX=9606 GN=CYFIP1 PE=1 SV=1	CYFIP1	0.999952	0.000231257	89.231	VQK(1)HDGKDEIIK	4	-1.3205	2	0.634	0.688	0.65	1.296	1.192	1.224
Cellular Component	GO:0030055	3	cell-substrate junction	0.00206293	P15880	275	3.946	Up	0.020878	K	40S ribosomal protein S2 OS=Homo sapiens OX=9606 GN=RPS2 PE=1 SV=2	RPS2	1	0.00013314	66.289	SPYQEFTDHLVK(1)THTR	4	-0.31731	1		0.19	0.445	1.296	1.113	1.35
Cellular Component	GO:0030055	3	cell-substrate junction	0.00206293	Q03135	57	1.523	Up	0.0012176	K	Caveolin-1 OS=Homo sapiens OX=9606 GN=CAV1 PE=1 SV=4	CAV1	1	0.00201216	67.997	DPK(1)HLNDDVVK	3	1.0261	1	0.694	0.781	0.816	1.145	1.139	1.206
Cellular Component	GO:0030055	3	cell-substrate junction	0.00206293	P62263	106	4.268	Up	8.5519e-07	K	40S ribosomal protein S14 OS=Homo sapiens OX=9606 GN=RPS14 PE=1 SV=3	RPS14	1	0.000851749	84.173	TK(1)TPGPGAQSALR	2	-2.5539	1	0.322	0.351	0.346	1.465	1.393	1.491
Cellular Component	GO:0030055	3	cell-substrate junction	0.00206293	P62263	96	1.537	Up	0.0272	K	40S ribosomal protein S14 OS=Homo sapiens OX=9606 GN=RPS14 PE=1 SV=3	RPS14	1	7.38528e-07	110.08	ELGITALHIK(1)LR	3	0.52572	2	0.692	0.795	0.788	0.974	1.432	1.09
Cellular Component	GO:0030055	3	cell-substrate junction	0.00206293	P04920	893	4.44	Up	4.2628e-05	K	Anion exchange protein 2 OS=Homo sapiens OX=9606 GN=SLC4A2 PE=1 SV=4	SLC4A2	1	2.23352e-06	112.42	SLAGQSGQGK(1)PR	2	-2.3535	1	0.287	0.375	0.323	1.476	1.415	1.482
Cellular Component	GO:0030055	3	cell-substrate junction	0.00206293	P62917	46	1.894	Up	1.75293e-05	K	60S ribosomal protein L8 OS=Homo sapiens OX=9606 GN=RPL8 PE=1 SV=2	RPL8	1	0.000128202	96.464	GIVK(1)DIIHDPGR	2	-0.25301	2	0.668	0.643	0.653	1.287	1.189	1.244
Cellular Component	GO:0030055	3	cell-substrate junction	0.00206293	O43707	779	1.506	Up	4.621e-06	K	Alpha-actinin-4 OS=Homo sapiens OX=9606 GN=ACTN4 PE=1 SV=2	ACTN4	1	2.1119e-07	92.098	ASFNHFDK(1)DHGGALGPEEFK	4	-0.48137	1	0.769	0.755	0.788	1.156	1.148	1.177
Cellular Component	GO:0030055	3	cell-substrate junction	0.00206293	Q02878	192	1.535	Up	0.00026491	K	60S ribosomal protein L6 OS=Homo sapiens OX=9606 GN=RPL6 PE=1 SV=3	RPL6	1	0.000693341	75.589	THQK(1)FVIATSTK	3	-0.46954	1	0.74	0.814	0.728	1.184	1.162	1.156
Cellular Component	GO:0030055	3	cell-substrate junction	0.00206293	P46777	27	1.597	Up	0.00119775	K	60S ribosomal protein L5 OS=Homo sapiens OX=9606 GN=RPL5 PE=1 SV=3	RPL5	1	0.0161426	70.412	EGK(1)TDYYAR	2	-0.47447	2	0.68	0.764	0.777	1.268	1.167	1.111
Cellular Component	GO:0030055	3	cell-substrate junction	0.00206293	P30101	494	1.633	Up	0.00061616	K	Protein disulfide-isomerase A3 OS=Homo sapiens OX=9606 GN=PDIA3 PE=1 SV=4	PDIA3	1	1.11552e-22	158.91	EATNPPVIQEEK(1)PK	2	-0.21724	3	0.713	0.703	0.767	1.119	1.287	1.158
Cellular Component	GO:0030055	3	cell-substrate junction	0.00206293	P63261	50	2.044	Up	0.00151871	K	Actin, cytoplasmic 2 OS=Homo sapiens OX=9606 GN=ACTG1 PE=1 SV=1	ACTG1	1	1.73645e-08	74.364	HQGVMVGMGQK(1)DSYVGDEAQSK	3	-0.91047	1	0.53	0.605	0.719	1.328	1.267	1.194
Cellular Component	GO:0030055	3	cell-substrate junction	0.00206293	Q9Y4L1	991	1.814	Up	0.00105528	K	Hypoxia up-regulated protein 1 OS=Homo sapiens OX=9606 GN=HYOU1 PE=1 SV=1	HYOU1	1	0.0356549	68.657	EQSTGQK(1)R	2	-0.21595	1	0.705	0.586	0.734	1.194	1.25	1.23
Cellular Component	GO:0030055	3	cell-substrate junction	0.00206293	Q9Y4L1	537	1.679	Up	0.00189553	K	Hypoxia up-regulated protein 1 OS=Homo sapiens OX=9606 GN=HYOU1 PE=1 SV=1	HYOU1	1	2.35366e-05	105.65	KYPDYESK(1)GIK	3	1.7955	1	0.728	0.644	0.773	1.297	1.201	1.103
Cellular Component	GO:0030055	3	cell-substrate junction	0.00206293	Q14247	161	1.788	Up	3.79e-05	K	Src substrate cortactin OS=Homo sapiens OX=9606 GN=CTTN PE=1 SV=2	CTTN	1	5.64477e-17	133.78	DYSSGFGGK(1)YGVQADR	2	0.1629	2	0.677	0.659	0.712	1.252	1.23	1.179
Cellular Component	GO:0030055	3	cell-substrate junction	0.00206293	Q14247	198	1.588	Up	0.00024373	K	Src substrate cortactin OS=Homo sapiens OX=9606 GN=CTTN PE=1 SV=2	CTTN	1	6.55628e-07	113.24	GFGGK(1)YGIDK	3	-0.15514	2	0.734	0.77	0.724	1.251	1.119	1.169
Cellular Component	GO:0030055	3	cell-substrate junction	0.00206293	P17301	261	4.97	Up	7.7205e-05	K	Integrin alpha-2 OS=Homo sapiens OX=9606 GN=ITGA2 PE=1 SV=1	ITGA2	1	5.75495e-08	138.89	K(1)YAYSAASGGR	2	-0.52946	1	0.253	0.307	0.334	1.631	1.406	1.406
Cellular Component	GO:0030055	3	cell-substrate junction	0.00206293	P21333	994	1.525	Up	1.9772e-05	K	Filamin-A OS=Homo sapiens OX=9606 GN=FLNA PE=1 SV=4	FLNA	1	0.00346172	85.813	DQEFTVK(1)SK	3	-0.051795	2	0.786	0.743	0.763	1.155	1.183	1.157
Cellular Component	GO:0030055	3	cell-substrate junction	0.00206293	P18564	548	1.991	Up	0.0032991	K	Integrin beta-6 OS=Homo sapiens OX=9606 GN=ITGB6 PE=1 SV=2	ITGB6	1	9.92231e-07	77.037	HK(1)GLLCGGNGDCDCGECVCR	3	-0.47256	1	0.5	0.688	0.699	1.2	1.299	1.258
Cellular Component	GO:0030055	3	cell-substrate junction	0.00206293	P36507	108	1.663	Up	0.0022007	K	Dual specificity mitogen-activated protein kinase kinase 2 OS=Homo sapiens OX=9606 GN=MAP2K2 PE=1 SV=1	MAP2K2	1	4.9811e-05	95.483	LIHLEIK(1)PAIR	3	-0.84799	1	0.79	0.663	0.705	1.236	1.078	1.275
Cellular Component	GO:0030055	3	cell-substrate junction	0.00206293	P14625	467	2.375	Up	0.00132479	K	Endoplasmin OS=Homo sapiens OX=9606 GN=HSP90B1 PE=1 SV=1	HSP90B1	1	0.0260932	82.287	K(1)TLDMIK	2	-1.9897	1	0.517	0.571	0.564	1.316	1.312	1.296
Cellular Component	GO:0030055	3	cell-substrate junction	0.00206293	P14625	473	1.531	Up	0.0021359	K	Endoplasmin OS=Homo sapiens OX=9606 GN=HSP90B1 PE=1 SV=1	HSP90B1	1	0.0291692	80.438	TLDMIK(1)K	3	-0.98878	2	0.833	0.741	0.715	1.239	1.084	1.181
Cellular Component	GO:0030055	3	cell-substrate junction	0.00206293	P23528	92	1.643	Up	3.7006e-05	K	Cofilin-1 OS=Homo sapiens OX=9606 GN=CFL1 PE=1 SV=3	CFL1	1	1.70741e-10	121.99	YALYDATYETK(1)ESK	2	0.88008	2	0.714	0.743	0.716	1.144	1.227	1.2
Cellular Component	GO:0030055	3	cell-substrate junction	0.00206293	P31946	70	1.526	Up	0.0008628	K	14-3-3 protein beta/alpha OS=Homo sapiens OX=9606 GN=YWHAB PE=1 SV=3	YWHAB	1	1.60397e-05	106.67	VISSIEQK(1)TER	3	-0.051644	2	0.777	0.814	0.701	1.201	1.131	1.165
Cellular Component	GO:0030055	3	cell-substrate junction	0.00206293	P23284	215	2.768	Up	5.7981e-05	K	Peptidyl-prolyl cis-trans isomerase B OS=Homo sapiens OX=9606 GN=PPIB PE=1 SV=2	PPIB	0.999974	0.00810599	71.531	IEVEKPFAIAK(1)E	2	0.05953	1	0.53	0.45	0.485	1.419	1.275	1.361
Cellular Component	GO:0030055	3	cell-substrate junction	0.00206293	P23284	186	1.623	Up	0.00046209	K	Peptidyl-prolyl cis-trans isomerase B OS=Homo sapiens OX=9606 GN=PPIB PE=1 SV=2	PPIB	1	0.00214624	76.326	VESTK(1)TDSR	2	1.0719	2	0.776	0.75	0.668	1.175	1.209	1.177
Cellular Component	GO:0030055	3	cell-substrate junction	0.00206293	P23284	129	1.737	Up	2.1985e-06	K	Peptidyl-prolyl cis-trans isomerase B OS=Homo sapiens OX=9606 GN=PPIB PE=1 SV=2	PPIB	1	0.0113626	70.942	FPDENFK(1)LK	3	-0.38822	2	0.71	0.703	0.677	1.218	1.193	1.22
Cellular Component	GO:0030055	3	cell-substrate junction	0.00206293	P13987	90	2.086	Up	2.1035e-06	K	CD59 glycoprotein OS=Homo sapiens OX=9606 GN=CD59 PE=1 SV=1	CD59	1	3.9152e-08	141.13	ENELTYYCCK(1)K	2	-0.33008	2	0.61	0.612	0.605	1.303	1.29	1.218
Cellular Component	GO:0030055	3	cell-substrate junction	0.00206293	P13987	66	1.753	Up	0.00061964	K	CD59 glycoprotein OS=Homo sapiens OX=9606 GN=CD59 PE=1 SV=1	CD59	1	4.46545e-17	135.72	CWK(1)FEHCNFNDVTTR	3	-2.6005	1	0.661	0.66	0.756	1.253	1.26	1.128
Cellular Component	GO:0030055	3	cell-substrate junction	0.00206293	P39023	66	1.637	Up	1.8678e-05	K	60S ribosomal protein L3 OS=Homo sapiens OX=9606 GN=RPL3 PE=1 SV=2	RPL3	1	0.0020035	71.153	EVDRPGSK(1)VNK	3	-0.11062	1	0.705	0.753	0.721	1.174	1.195	1.199
Cellular Component	GO:0030055	3	cell-substrate junction	0.00206293	P39023	115	1.601	Up	0.00150122	K	60S ribosomal protein L3 OS=Homo sapiens OX=9606 GN=RPL3 PE=1 SV=2	RPL3	1	0.000290809	84.734	TVFAEHISDECK(1)R	3	-0.2477	1	0.682	0.738	0.796	1.244	1.216	1.088
Cellular Component	GO:0030055	3	cell-substrate junction	0.00206293	P62249	26	1.879	Up	0.0027232	K	40S ribosomal protein S16 OS=Homo sapiens OX=9606 GN=RPS16 PE=1 SV=2	RPS16	1	0.0195879	51.762	TATAVAHCK(1)R	3	-0.38563	1	0.581	0.604	0.786	1.233	1.194	1.277
Cellular Component	GO:0030055	3	cell-substrate junction	0.00206293	P62277	34	1.54	Up	5.7354e-05	K	40S ribosomal protein S13 OS=Homo sapiens OX=9606 GN=RPS13 PE=1 SV=2	RPS13	1	4.38739e-08	131.35	LTSDDVK(1)EQIYK	2	0.23715	1	0.761	0.744	0.773	1.215	1.163	1.13
Cellular Component	GO:0030055	3	cell-substrate junction	0.00206293	P62269	137	1.73	Up	2.4191e-06	K	40S ribosomal protein S18 OS=Homo sapiens OX=9606 GN=RPS18 PE=1 SV=3	RPS18	1	0.00404982	83.438	GQHTK(1)TTGR	2	0.13381	2	0.682	0.709	0.705	1.22	1.182	1.224
Cellular Component	GO:0030055	3	cell-substrate junction	0.00206293	P35221	881	1.511	Up	0.00040268	K	Catenin alpha-1 OS=Homo sapiens OX=9606 GN=CTNNA1 PE=1 SV=1	CTNNA1	1	0.00164808	73.927	EKQDETQTK(1)IK	3	0.98541	1	0.774	0.811	0.723	1.193	1.172	1.122
Cellular Component	GO:0030055	3	cell-substrate junction	0.00206293	P11021	553	1.584	Up	0.00051646	K	Endoplasmic reticulum chaperone BiP OS=Homo sapiens OX=9606 GN=HSPA5 PE=1 SV=2	HSPA5	1	0.0198462	68.915	FAEEDK(1)K	3	0.25072	1	0.739	0.758	0.737	1.273	1.094	1.171
Cellular Component	GO:0030055	3	cell-substrate junction	0.00206293	P11021	352	1.593	Up	7.6558e-05	K	Endoplasmic reticulum chaperone BiP OS=Homo sapiens OX=9606 GN=HSPA5 PE=1 SV=2	HSPA5	1	0.000769989	104.22	VLEDSDLK(1)K	3	2.7364	2	0.731	0.73	0.76	1.123	1.214	1.2
Cellular Component	GO:0034703	8	cation channel complex	0.157366	Q12797	336	1.771	Up	0.0099388	K	Aspartyl/asparaginyl beta-hydroxylase OS=Homo sapiens OX=9606 GN=ASPH PE=1 SV=3	ASPH	1	0.0197409	87.476	LLNK(1)FDK	2	2.2137	1	0.759	0.622	0.682	1.221	1.227	1.206
Cellular Component	GO:0034703	8	cation channel complex	0.157366	Q14247	161	1.788	Up	3.79e-05	K	Src substrate cortactin OS=Homo sapiens OX=9606 GN=CTTN PE=1 SV=2	CTTN	1	5.64477e-17	133.78	DYSSGFGGK(1)YGVQADR	2	0.1629	2	0.677	0.659	0.712	1.252	1.23	1.179
Cellular Component	GO:0034703	8	cation channel complex	0.157366	Q14247	198	1.588	Up	0.00024373	K	Src substrate cortactin OS=Homo sapiens OX=9606 GN=CTTN PE=1 SV=2	CTTN	1	6.55628e-07	113.24	GFGGK(1)YGIDK	3	-0.15514	2	0.734	0.77	0.724	1.251	1.119	1.169
Cellular Component	GO:0030427	4	site of polarized growth	0.112577	Q9UPX8	1174	1.904	Up	0.00047943	K	SH3 and multiple ankyrin repeat domains protein 2 OS=Homo sapiens OX=9606 GN=SHANK2 PE=1 SV=3	SHANK2	1	0.0255254	57.281	MK(1)PIIHK	3	-3.76	1	0.718	0.65	0.589	1.296	1.239	1.192
Cellular Component	GO:0030427	4	site of polarized growth	0.112577	P35580	1782	1.618	Up	0.00133836	K	Myosin-10 OS=Homo sapiens OX=9606 GN=MYH10 PE=1 SV=3	MYH10	1	0.000848405	90.614	SAAQK(1)SDNAR	2	-0.18483	1	0.811	0.675	0.713	1.145	1.249	1.164
Cellular Component	GO:0030427	4	site of polarized growth	0.112577	P23528	92	1.643	Up	3.7006e-05	K	Cofilin-1 OS=Homo sapiens OX=9606 GN=CFL1 PE=1 SV=3	CFL1	1	1.70741e-10	121.99	YALYDATYETK(1)ESK	2	0.88008	2	0.714	0.743	0.716	1.144	1.227	1.2
Cellular Component	GO:0030427	4	site of polarized growth	0.112577	P07196	128	1.516	Up	0.0130616	K	Neurofilament light polypeptide OS=Homo sapiens OX=9606 GN=NEFL PE=1 SV=3	NEFL	1	0.0426312	41.448	QK(1)HSEPSR	3	0.068112	1	0.63	0.85	0.819	1.199	1.198	1.089
Cellular Component	GO:0030427	4	site of polarized growth	0.112577	Q13009	564	2.554	Up	2.264e-05	K	T-lymphoma invasion and metastasis-inducing protein 1 OS=Homo sapiens OX=9606 GN=TIAM1 PE=1 SV=2	TIAM1	1	0.00536023	86.794	LLK(1)SEIK	3	-0.69534	1	0.501	0.52	0.54	1.387	1.234	1.366
Cellular Component	GO:0030427	4	site of polarized growth	0.112577	Q7L576	1188	1.882	Up	5.6212e-05	K	Cytoplasmic FMR1-interacting protein 1 OS=Homo sapiens OX=9606 GN=CYFIP1 PE=1 SV=1	CYFIP1	0.999952	0.000231257	89.231	VQK(1)HDGKDEIIK	4	-1.3205	2	0.634	0.688	0.65	1.296	1.192	1.224
Cellular Component	GO:0031012	4	extracellular matrix	2.53041e-05	P04843	187	2.143	Up	1.58621e-05	K	Dolichyl-diphosphooligosaccharide--protein glycosyltransferase subunit 1 OS=Homo sapiens OX=9606 GN=RPN1 PE=1 SV=1	RPN1	1	1.75673e-17	156.17	NVESYTK(1)LGNPTR	2	-0.077266	1	0.57	0.614	0.604	1.244	1.32	1.267
Cellular Component	GO:0031012	4	extracellular matrix	2.53041e-05	P48047	90	1.539	Up	3.6942e-05	K	ATP synthase subunit O, mitochondrial OS=Homo sapiens OX=9606 GN=ATP5PO PE=1 SV=1	ATP5PO	1	4.77131e-05	120.87	VK(1)SLNDITAK	3	-0.097512	2	0.786	0.739	0.752	1.171	1.146	1.188
Cellular Component	GO:0031012	4	extracellular matrix	2.53041e-05	P23229	144	3.768	Up	1.57151e-05	K	Integrin alpha-6 OS=Homo sapiens OX=9606 GN=ITGA6 PE=1 SV=5	ITGA6	1	3.1719e-06	130.01	QHVNTK(1)QESR	2	1.0391	2	0.354	0.398	0.382	1.474	1.325	1.474
Cellular Component	GO:0031012	4	extracellular matrix	2.53041e-05	P23229	594	2.852	Up	0.0097615	K	Integrin alpha-6 OS=Homo sapiens OX=9606 GN=ITGA6 PE=1 SV=5	ITGA6	1	0.0014851	102.53	YTQELTLK(1)R	2	0.55207	2	0.382	0.524	0.521	1.331	1.345	1.394
Cellular Component	GO:0031012	4	extracellular matrix	2.53041e-05	O75487	44	1.652	Up	4.6607e-06	K	Glypican-4 OS=Homo sapiens OX=9606 GN=GPC4 PE=1 SV=4	GPC4	1	1.65724e-10	118.72	GFNK(1)NDAPLHEINGDHLK	4	0.22408	2	0.727	0.708	0.733	1.228	1.179	1.174
Cellular Component	GO:0031012	4	extracellular matrix	2.53041e-05	P62263	106	4.268	Up	8.5519e-07	K	40S ribosomal protein S14 OS=Homo sapiens OX=9606 GN=RPS14 PE=1 SV=3	RPS14	1	0.000851749	84.173	TK(1)TPGPGAQSALR	2	-2.5539	1	0.322	0.351	0.346	1.465	1.393	1.491
Cellular Component	GO:0031012	4	extracellular matrix	2.53041e-05	P62263	96	1.537	Up	0.0272	K	40S ribosomal protein S14 OS=Homo sapiens OX=9606 GN=RPS14 PE=1 SV=3	RPS14	1	7.38528e-07	110.08	ELGITALHIK(1)LR	3	0.52572	2	0.692	0.795	0.788	0.974	1.432	1.09
Cellular Component	GO:0031012	4	extracellular matrix	2.53041e-05	P63261	50	2.044	Up	0.00151871	K	Actin, cytoplasmic 2 OS=Homo sapiens OX=9606 GN=ACTG1 PE=1 SV=1	ACTG1	1	1.73645e-08	74.364	HQGVMVGMGQK(1)DSYVGDEAQSK	3	-0.91047	1	0.53	0.605	0.719	1.328	1.267	1.194
Cellular Component	GO:0031012	4	extracellular matrix	2.53041e-05	P78527	3642	1.51	Up	2.3019e-05	K	DNA-dependent protein kinase catalytic subunit OS=Homo sapiens OX=9606 GN=PRKDC PE=1 SV=3	PRKDC	1	0.0283698	49.715	EFDK(1)HFGK	3	0.53551	1	0.784	0.759	0.766	1.191	1.169	1.127
Cellular Component	GO:0031012	4	extracellular matrix	2.53041e-05	P02458	1444	3.469	Up	1.93387e-05	K	Collagen alpha-1(II) chain OS=Homo sapiens OX=9606 GN=COL2A1 PE=1 SV=3	COL2A1	1	0.014601	68.915	HTGK(1)WGK	3	-0.79413	1	0.434	0.395	0.388	1.483	1.302	1.437
Cellular Component	GO:0031012	4	extracellular matrix	2.53041e-05	P15692	149	1.52	Up	0.0183197	K	Vascular endothelial growth factor A OS=Homo sapiens OX=9606 GN=VEGFA PE=1 SV=2	VEGFA	1	0.0158118	68.016	GK(1)GK(1)GQK(1)R	3	0.20842	1	0.619	0.836	0.835	1.054	1.197	1.23
Cellular Component	GO:0031012	4	extracellular matrix	2.53041e-05	P15692	147	1.52	Up	0.0183197	K	Vascular endothelial growth factor A OS=Homo sapiens OX=9606 GN=VEGFA PE=1 SV=2	VEGFA	1	0.0158118	68.016	GK(1)GK(1)GQK(1)R	3	0.20842	1	0.619	0.836	0.835	1.054	1.197	1.23
Cellular Component	GO:0031012	4	extracellular matrix	2.53041e-05	P15692	152	1.52	Up	0.0183197	K	Vascular endothelial growth factor A OS=Homo sapiens OX=9606 GN=VEGFA PE=1 SV=2	VEGFA	1	0.0158118	68.016	GK(1)GK(1)GQK(1)R	3	0.20842	1	0.619	0.836	0.835	1.054	1.197	1.23
Cellular Component	GO:0031012	4	extracellular matrix	2.53041e-05	P21333	994	1.525	Up	1.9772e-05	K	Filamin-A OS=Homo sapiens OX=9606 GN=FLNA PE=1 SV=4	FLNA	1	0.00346172	85.813	DQEFTVK(1)SK	3	-0.051795	2	0.786	0.743	0.763	1.155	1.183	1.157
Cellular Component	GO:0031012	4	extracellular matrix	2.53041e-05	Q07065	301	1.726	Up	0.0034984	K	Cytoskeleton-associated protein 4 OS=Homo sapiens OX=9606 GN=CKAP4 PE=1 SV=2	CKAP4	1	0.00142164	100.92	EIQTSAK(1)SR	2	-1.0848	1	0.759	0.586	0.755	1.211	1.151	1.262
Cellular Component	GO:0031012	4	extracellular matrix	2.53041e-05	P13639	32	1.652	Up	0.0028208	K	Elongation factor 2 OS=Homo sapiens OX=9606 GN=EEF2 PE=1 SV=4	EEF2	1	0.000910029	50.858	NMSVIAHVDHGK(1)STLTDSLVCK	4	-0.77941	1	0.655	0.728	0.777	1.058	1.229	1.282
Cellular Component	GO:0031012	4	extracellular matrix	2.53041e-05	P14625	467	2.375	Up	0.00132479	K	Endoplasmin OS=Homo sapiens OX=9606 GN=HSP90B1 PE=1 SV=1	HSP90B1	1	0.0260932	82.287	K(1)TLDMIK	2	-1.9897	1	0.517	0.571	0.564	1.316	1.312	1.296
Cellular Component	GO:0031012	4	extracellular matrix	2.53041e-05	P14625	473	1.531	Up	0.0021359	K	Endoplasmin OS=Homo sapiens OX=9606 GN=HSP90B1 PE=1 SV=1	HSP90B1	1	0.0291692	80.438	TLDMIK(1)K	3	-0.98878	2	0.833	0.741	0.715	1.239	1.084	1.181
Cellular Component	GO:0031012	4	extracellular matrix	2.53041e-05	P23528	92	1.643	Up	3.7006e-05	K	Cofilin-1 OS=Homo sapiens OX=9606 GN=CFL1 PE=1 SV=3	CFL1	1	1.70741e-10	121.99	YALYDATYETK(1)ESK	2	0.88008	2	0.714	0.743	0.716	1.144	1.227	1.2
Cellular Component	GO:0031012	4	extracellular matrix	2.53041e-05	P13726	233	2.168	Up	0.00033987	K	Tissue factor OS=Homo sapiens OX=9606 GN=F3 PE=1 SV=1	F3	1	2.77667e-05	95.57	K(1)STDSPVECMGQEK	3	2.065	1	0.588	0.527	0.659	1.34	1.252	1.254
Cellular Component	GO:0031012	4	extracellular matrix	2.53041e-05	P02765	225	2.633	Up	1.9636e-06	K	Alpha-2-HS-glycoprotein OS=Homo sapiens OX=9606 GN=AHSG PE=1 SV=2	AHSG	1	1.71027e-17	156.24	CNLLAEK(1)QYGFCK	3	-0.271	5	0.509	0.493	0.523	1.376	1.357	1.282
Cellular Component	GO:0031012	4	extracellular matrix	2.53041e-05	P62805	92	2.182	Up	1.6411e-05	K	Histone H4 OS=Homo sapiens OX=9606 GN=H4C1 PE=1 SV=2	H4C1	1	6.24962e-36	186.16	TVTAMDVVYALK(1)R	2	-0.23684	16	0.562	0.581	0.621	1.289	1.292	1.268
Cellular Component	GO:0031012	4	extracellular matrix	2.53041e-05	P62805	32	1.653	Up	0.0134408	K	Histone H4 OS=Homo sapiens OX=9606 GN=H4C1 PE=1 SV=2	H4C1	1	3.04485e-08	128.68	DNIQGITK(1)PAIR	2	0.4573	2	0.677	0.679	0.809	1.203	1.199	1.177
Cellular Component	GO:0031012	4	extracellular matrix	2.53041e-05	P62805	80	2.391	Up	2.114e-07	K	Histone H4 OS=Homo sapiens OX=9606 GN=H4C1 PE=1 SV=2	H4C1	1	3.87738e-17	153.23	K(1)TVTAMDVVYALK(1)R	3	-0.75923	21	0.556	0.541	0.548	1.342	1.293	1.298
Cellular Component	GO:0031012	4	extracellular matrix	2.53041e-05	P62805	78	1.846	Up	1.73873e-05	K	Histone H4 OS=Homo sapiens OX=9606 GN=H4C1 PE=1 SV=2	H4C1	1	3.72767e-11	151.98	DAVTYTEHAK(1)R	2	0.33428	3	0.693	0.658	0.65	1.26	1.199	1.235
Cellular Component	GO:0031012	4	extracellular matrix	2.53041e-05	P62805	17	1.611	Up	2.4396e-05	K	Histone H4 OS=Homo sapiens OX=9606 GN=H4C1 PE=1 SV=2	H4C1	1	1.37446e-45	190.24	GLGK(1)GGAK(1)R	2	-1.3239	136	0.728	0.747	0.73	1.202	1.136	1.215
Cellular Component	GO:0031012	4	extracellular matrix	2.53041e-05	P17844	33	1.57	Up	2.1671e-06	K	Probable ATP-dependent RNA helicase DDX5 OS=Homo sapiens OX=9606 GN=DDX5 PE=1 SV=1	DDX5	1	0.0114461	85.533	K(1)FGNPGEK	2	0.64993	1	0.756	0.73	0.76	1.172	1.17	1.184
Cellular Component	GO:0031012	4	extracellular matrix	2.53041e-05	P17844	45	1.709	Up	0.00047944	K	Probable ATP-dependent RNA helicase DDX5 OS=Homo sapiens OX=9606 GN=DDX5 PE=1 SV=1	DDX5	1	0.0064221	68.657	K(1)WNLDELPK	3	0.20029	1	0.715	0.73	0.671	1.179	1.31	1.127
Cellular Component	GO:0031012	4	extracellular matrix	2.53041e-05	Q15063	676	1.528	Up	0.00066247	K	Periostin OS=Homo sapiens OX=9606 GN=POSTN PE=1 SV=2	POSTN	1	0.00277252	88.596	IITK(1)VVEPK	2	-0.2033	1	0.802	0.784	0.702	1.127	1.19	1.178
Cellular Component	GO:0031012	4	extracellular matrix	2.53041e-05	P27824	87	1.514	Up	0.00095527	K	Calnexin OS=Homo sapiens OX=9606 GN=CANX PE=1 SV=2	CANX	1	0.014782	46.88	GTLSGWILSK(1)AK	3	-0.67335	1	0.807	0.786	0.712	1.226	1.112	1.152
Cellular Component	GO:0031012	4	extracellular matrix	2.53041e-05	P62249	26	1.879	Up	0.0027232	K	40S ribosomal protein S16 OS=Homo sapiens OX=9606 GN=RPS16 PE=1 SV=2	RPS16	1	0.0195879	51.762	TATAVAHCK(1)R	3	-0.38563	1	0.581	0.604	0.786	1.233	1.194	1.277
Cellular Component	GO:0031012	4	extracellular matrix	2.53041e-05	P62277	34	1.54	Up	5.7354e-05	K	40S ribosomal protein S13 OS=Homo sapiens OX=9606 GN=RPS13 PE=1 SV=2	RPS13	1	4.38739e-08	131.35	LTSDDVK(1)EQIYK	2	0.23715	1	0.761	0.744	0.773	1.215	1.163	1.13
Cellular Component	GO:0031012	4	extracellular matrix	2.53041e-05	P24043	3092	1.918	Up	1.50302e-05	K	Laminin subunit alpha-2 OS=Homo sapiens OX=9606 GN=LAMA2 PE=1 SV=4	LAMA2	1	0.0350388	67.385	GCIRSLK(1)LTK	2	3.4243	1	0.661	0.626	0.658	1.283	1.221	1.227
Cellular Component	GO:0031012	4	extracellular matrix	2.53041e-05	P62269	137	1.73	Up	2.4191e-06	K	40S ribosomal protein S18 OS=Homo sapiens OX=9606 GN=RPS18 PE=1 SV=3	RPS18	1	0.00404982	83.438	GQHTK(1)TTGR	2	0.13381	2	0.682	0.709	0.705	1.22	1.182	1.224
Cellular Component	GO:0031012	4	extracellular matrix	2.53041e-05	Q16787	2135	1.622	Up	3.461e-06	K	Laminin subunit alpha-3 OS=Homo sapiens OX=9606 GN=LAMA3 PE=1 SV=2	LAMA3	1	0.000133898	89.507	SAGK(1)TSLVEEAEK	2	-0.15811	2	0.721	0.727	0.746	1.166	1.178	1.214
Cellular Component	GO:0031012	4	extracellular matrix	2.53041e-05	P11021	553	1.584	Up	0.00051646	K	Endoplasmic reticulum chaperone BiP OS=Homo sapiens OX=9606 GN=HSPA5 PE=1 SV=2	HSPA5	1	0.0198462	68.915	FAEEDK(1)K	3	0.25072	1	0.739	0.758	0.737	1.273	1.094	1.171
Cellular Component	GO:0031012	4	extracellular matrix	2.53041e-05	P11021	352	1.593	Up	7.6558e-05	K	Endoplasmic reticulum chaperone BiP OS=Homo sapiens OX=9606 GN=HSPA5 PE=1 SV=2	HSPA5	1	0.000769989	104.22	VLEDSDLK(1)K	3	2.7364	2	0.731	0.73	0.76	1.123	1.214	1.2
Cellular Component	GO:0005684	11	U2-type spliceosomal complex	0.234586	Q15428	10	1.614	Up	0.0156602	K	Splicing factor 3A subunit 2 OS=Homo sapiens OX=9606 GN=SF3A2 PE=1 SV=2	SF3A2	1	1.3659e-26	154.07	PGGK(1)TGSGGVASSSESNR	2	0.58071	2	0.71	0.876	0.616	1.25	1.04	1.265
Cellular Component	GO:0005684	11	U2-type spliceosomal complex	0.234586	P26368	462	1.533	Up	0.00065807	K	Splicing factor U2AF 65 kDa subunit OS=Homo sapiens OX=9606 GN=U2AF2 PE=1 SV=4	U2AF2	1	0.000151529	86.944	VVVTK(1)YCDPDSYHR	3	-0.73037	2	0.702	0.77	0.809	1.15	1.143	1.203
Cellular Component	GO:0005684	11	U2-type spliceosomal complex	0.234586	Q15459	754	1.678	Up	0.0092791	K	Splicing factor 3A subunit 1 OS=Homo sapiens OX=9606 GN=SF3A1 PE=1 SV=1	SF3A1	1	0.000115335	90.614	IHEATGMPAGK(1)QK	3	1.5095	1	0.66	0.661	0.823	1.204	1.365	1.029
Cellular Component	GO:0001725	12	stress fiber	0.303814	Q4VCS5	585	2.51	Up	9.7814e-08	K	Angiomotin OS=Homo sapiens OX=9606 GN=AMOT PE=1 SV=1	AMOT	1	0.0447623	40.941	DQALSNAQAK(1)VVK	2	0.43599	1	0.537	0.526	0.519	1.311	1.317	1.343
Cellular Component	GO:0001725	12	stress fiber	0.303814	P35580	1782	1.618	Up	0.00133836	K	Myosin-10 OS=Homo sapiens OX=9606 GN=MYH10 PE=1 SV=3	MYH10	1	0.000848405	90.614	SAAQK(1)SDNAR	2	-0.18483	1	0.811	0.675	0.713	1.145	1.249	1.164
Cellular Component	GO:0001725	12	stress fiber	0.303814	O43707	779	1.506	Up	4.621e-06	K	Alpha-actinin-4 OS=Homo sapiens OX=9606 GN=ACTN4 PE=1 SV=2	ACTN4	1	2.1119e-07	92.098	ASFNHFDK(1)DHGGALGPEEFK	4	-0.48137	1	0.769	0.755	0.788	1.156	1.148	1.177
Cellular Component	GO:0016529	9	sarcoplasmic reticulum	0.250745	Q12797	336	1.771	Up	0.0099388	K	Aspartyl/asparaginyl beta-hydroxylase OS=Homo sapiens OX=9606 GN=ASPH PE=1 SV=3	ASPH	1	0.0197409	87.476	LLNK(1)FDK	2	2.2137	1	0.759	0.622	0.682	1.221	1.227	1.206
Cellular Component	GO:0016529	9	sarcoplasmic reticulum	0.250745	Q13557	268	2.448	Up	0.00064196	K	Calcium/calmodulin-dependent protein kinase type II subunit delta OS=Homo sapiens OX=9606 GN=CAMK2D PE=1 SV=3	CAMK2D	1	9.73432e-06	94.09	ITASEALK(1)HPWICQR	3	-2.1026	1	0.448	0.594	0.572	1.394	1.259	1.298
Cellular Component	GO:0097517	11	contractile actin filament bundle	0.303814	Q4VCS5	585	2.51	Up	9.7814e-08	K	Angiomotin OS=Homo sapiens OX=9606 GN=AMOT PE=1 SV=1	AMOT	1	0.0447623	40.941	DQALSNAQAK(1)VVK	2	0.43599	1	0.537	0.526	0.519	1.311	1.317	1.343
Cellular Component	GO:0097517	11	contractile actin filament bundle	0.303814	P35580	1782	1.618	Up	0.00133836	K	Myosin-10 OS=Homo sapiens OX=9606 GN=MYH10 PE=1 SV=3	MYH10	1	0.000848405	90.614	SAAQK(1)SDNAR	2	-0.18483	1	0.811	0.675	0.713	1.145	1.249	1.164
Cellular Component	GO:0097517	11	contractile actin filament bundle	0.303814	O43707	779	1.506	Up	4.621e-06	K	Alpha-actinin-4 OS=Homo sapiens OX=9606 GN=ACTN4 PE=1 SV=2	ACTN4	1	2.1119e-07	92.098	ASFNHFDK(1)DHGGALGPEEFK	4	-0.48137	1	0.769	0.755	0.788	1.156	1.148	1.177
Cellular Component	GO:0043596	13	nuclear replication fork	0.203449	P11387	252	1.611	Up	0.0086001	K	DNA topoisomerase 1 OS=Homo sapiens OX=9606 GN=TOP1 PE=1 SV=2	TOP1	1	0.00441055	51.771	LSPK(1)AEEVATFFAK	3	-3.501	1	0.684	0.692	0.831	1.198	1.332	1.025
Cellular Component	GO:0043596	13	nuclear replication fork	0.203449	P11387	218	1.572	Up	0.0049752	K	DNA topoisomerase 1 OS=Homo sapiens OX=9606 GN=TOP1 PE=1 SV=2	TOP1	1	0.00578621	85.212	WK(1)FLEHK	3	-0.5485	1	0.654	0.728	0.858	1.154	1.144	1.224
Cellular Component	GO:0043596	13	nuclear replication fork	0.203449	P27694	163	2.076	Up	1.81648e-05	K	Replication protein A 70 kDa DNA-binding subunit OS=Homo sapiens OX=9606 GN=RPA1 PE=1 SV=2	RPA1	1	9.99335e-08	143.97	AYGASK(1)TFGK	3	1.1683	2	0.616	0.618	0.6	1.341	1.243	1.224
Cellular Component	GO:0072562	5	blood microparticle	0.0971656	Q4V328	230	1.993	Up	2.4653e-05	K	GRIP1-associated protein 1 OS=Homo sapiens OX=9606 GN=GRIPAP1 PE=1 SV=2	GRIPAP1	1	0.00135038	86.772	LQEELAK(1)LSEK	3	-0.18655	2	0.659	0.631	0.6	1.287	1.212	1.268
Cellular Component	GO:0072562	5	blood microparticle	0.0971656	P02765	225	2.633	Up	1.9636e-06	K	Alpha-2-HS-glycoprotein OS=Homo sapiens OX=9606 GN=AHSG PE=1 SV=2	AHSG	1	1.71027e-17	156.24	CNLLAEK(1)QYGFCK	3	-0.271	5	0.509	0.493	0.523	1.376	1.357	1.282
Cellular Component	GO:0072562	5	blood microparticle	0.0971656	P62195	330	2.306	Up	0.0105445	K	26S proteasome regulatory subunit 8 OS=Homo sapiens OX=9606 GN=PSMC5 PE=1 SV=1	PSMC5	1	0.006593	64.82	LDILK(1)IHSR	3	-0.7783	1	0.602	0.591	0.492	0.932	1.66	1.293
Cellular Component	GO:0072562	5	blood microparticle	0.0971656	P63261	50	2.044	Up	0.00151871	K	Actin, cytoplasmic 2 OS=Homo sapiens OX=9606 GN=ACTG1 PE=1 SV=1	ACTG1	1	1.73645e-08	74.364	HQGVMVGMGQK(1)DSYVGDEAQSK	3	-0.91047	1	0.53	0.605	0.719	1.328	1.267	1.194
Cellular Component	GO:0009898	7	cytoplasmic side of plasma membrane	0.18939	P06703	26	2.219	Up	4.3761e-07	K	Protein S100-A6 OS=Homo sapiens OX=9606 GN=S100A6 PE=1 SV=1	S100A6	1	0.000547997	123.67	EGDK(1)HTLSK	3	0.31653	4	0.577	0.586	0.58	1.326	1.28	1.261
Cellular Component	GO:0009898	7	cytoplasmic side of plasma membrane	0.18939	P36507	108	1.663	Up	0.0022007	K	Dual specificity mitogen-activated protein kinase kinase 2 OS=Homo sapiens OX=9606 GN=MAP2K2 PE=1 SV=1	MAP2K2	1	4.9811e-05	95.483	LIHLEIK(1)PAIR	3	-0.84799	1	0.79	0.663	0.705	1.236	1.078	1.275
Cellular Component	GO:0009898	7	cytoplasmic side of plasma membrane	0.18939	Q9H444	14	1.582	Up	0.0041192	K	Charged multivesicular body protein 4b OS=Homo sapiens OX=9606 GN=CHMP4B PE=1 SV=1	CHMP4B	1	3.09123e-05	113.93	LFGAGGGK(1)AGK	3	-0.24622	2	0.803	0.777	0.655	1.145	1.286	1.105
Cellular Component	GO:0009898	7	cytoplasmic side of plasma membrane	0.18939	Q13009	564	2.554	Up	2.264e-05	K	T-lymphoma invasion and metastasis-inducing protein 1 OS=Homo sapiens OX=9606 GN=TIAM1 PE=1 SV=2	TIAM1	1	0.00536023	86.794	LLK(1)SEIK	3	-0.69534	1	0.501	0.52	0.54	1.387	1.234	1.366
Cellular Component	GO:0044306	6	neuron projection terminus	0.168926	P17174	97	1.571	Up	0.0062823	K	Aspartate aminotransferase, cytoplasmic OS=Homo sapiens OX=9606 GN=GOT1 PE=1 SV=3	GOT1	1	0.000526115	69.03	LALGDDSPALK(1)EK	3	4.0464	1	0.768	0.717	0.76	1.092	1.374	1.06
Cellular Component	GO:0044306	6	neuron projection terminus	0.168926	Q7L576	1188	1.882	Up	5.6212e-05	K	Cytoplasmic FMR1-interacting protein 1 OS=Homo sapiens OX=9606 GN=CYFIP1 PE=1 SV=1	CYFIP1	0.999952	0.000231257	89.231	VQK(1)HDGKDEIIK	4	-1.3205	2	0.634	0.688	0.65	1.296	1.192	1.224
Cellular Component	GO:0044306	6	neuron projection terminus	0.168926	P17301	261	4.97	Up	7.7205e-05	K	Integrin alpha-2 OS=Homo sapiens OX=9606 GN=ITGA2 PE=1 SV=1	ITGA2	1	5.75495e-08	138.89	K(1)YAYSAASGGR	2	-0.52946	1	0.253	0.307	0.334	1.631	1.406	1.406
Cellular Component	GO:0098552	4	side of membrane	0.00138653	P18564	548	1.991	Up	0.0032991	K	Integrin beta-6 OS=Homo sapiens OX=9606 GN=ITGB6 PE=1 SV=2	ITGB6	1	9.92231e-07	77.037	HK(1)GLLCGGNGDCDCGECVCR	3	-0.47256	1	0.5	0.688	0.699	1.2	1.299	1.258
Cellular Component	GO:0098552	4	side of membrane	0.00138653	P06703	26	2.219	Up	4.3761e-07	K	Protein S100-A6 OS=Homo sapiens OX=9606 GN=S100A6 PE=1 SV=1	S100A6	1	0.000547997	123.67	EGDK(1)HTLSK	3	0.31653	4	0.577	0.586	0.58	1.326	1.28	1.261
Cellular Component	GO:0098552	4	side of membrane	0.00138653	P36507	108	1.663	Up	0.0022007	K	Dual specificity mitogen-activated protein kinase kinase 2 OS=Homo sapiens OX=9606 GN=MAP2K2 PE=1 SV=1	MAP2K2	1	4.9811e-05	95.483	LIHLEIK(1)PAIR	3	-0.84799	1	0.79	0.663	0.705	1.236	1.078	1.275
Cellular Component	GO:0098552	4	side of membrane	0.00138653	P23229	144	3.768	Up	1.57151e-05	K	Integrin alpha-6 OS=Homo sapiens OX=9606 GN=ITGA6 PE=1 SV=5	ITGA6	1	3.1719e-06	130.01	QHVNTK(1)QESR	2	1.0391	2	0.354	0.398	0.382	1.474	1.325	1.474
Cellular Component	GO:0098552	4	side of membrane	0.00138653	P23229	594	2.852	Up	0.0097615	K	Integrin alpha-6 OS=Homo sapiens OX=9606 GN=ITGA6 PE=1 SV=5	ITGA6	1	0.0014851	102.53	YTQELTLK(1)R	2	0.55207	2	0.382	0.524	0.521	1.331	1.345	1.394
Cellular Component	GO:0098552	4	side of membrane	0.00138653	P13726	233	2.168	Up	0.00033987	K	Tissue factor OS=Homo sapiens OX=9606 GN=F3 PE=1 SV=1	F3	1	2.77667e-05	95.57	K(1)STDSPVECMGQEK	3	2.065	1	0.588	0.527	0.659	1.34	1.252	1.254
Cellular Component	GO:0098552	4	side of membrane	0.00138653	P15291	348	1.811	Up	0.0005237	K	Beta-1,4-galactosyltransferase 1 OS=Homo sapiens OX=9606 GN=B4GALT1 PE=1 SV=5	B4GALT1	1	0.0295481	72.23	K(1)NEPNPQR	2	0.42742	1	0.751	0.632	0.648	1.279	1.22	1.18
Cellular Component	GO:0098552	4	side of membrane	0.00138653	O75487	44	1.652	Up	4.6607e-06	K	Glypican-4 OS=Homo sapiens OX=9606 GN=GPC4 PE=1 SV=4	GPC4	1	1.65724e-10	118.72	GFNK(1)NDAPLHEINGDHLK	4	0.22408	2	0.727	0.708	0.733	1.228	1.179	1.174
Cellular Component	GO:0098552	4	side of membrane	0.00138653	P13987	90	2.086	Up	2.1035e-06	K	CD59 glycoprotein OS=Homo sapiens OX=9606 GN=CD59 PE=1 SV=1	CD59	1	3.9152e-08	141.13	ENELTYYCCK(1)K	2	-0.33008	2	0.61	0.612	0.605	1.303	1.29	1.218
Cellular Component	GO:0098552	4	side of membrane	0.00138653	P13987	66	1.753	Up	0.00061964	K	CD59 glycoprotein OS=Homo sapiens OX=9606 GN=CD59 PE=1 SV=1	CD59	1	4.46545e-17	135.72	CWK(1)FEHCNFNDVTTR	3	-2.6005	1	0.661	0.66	0.756	1.253	1.26	1.128
Cellular Component	GO:0098552	4	side of membrane	0.00138653	Q4VCS5	585	2.51	Up	9.7814e-08	K	Angiomotin OS=Homo sapiens OX=9606 GN=AMOT PE=1 SV=1	AMOT	1	0.0447623	40.941	DQALSNAQAK(1)VVK	2	0.43599	1	0.537	0.526	0.519	1.311	1.317	1.343
Cellular Component	GO:0098552	4	side of membrane	0.00138653	Q9H444	14	1.582	Up	0.0041192	K	Charged multivesicular body protein 4b OS=Homo sapiens OX=9606 GN=CHMP4B PE=1 SV=1	CHMP4B	1	3.09123e-05	113.93	LFGAGGGK(1)AGK	3	-0.24622	2	0.803	0.777	0.655	1.145	1.286	1.105
Cellular Component	GO:0098552	4	side of membrane	0.00138653	P27824	87	1.514	Up	0.00095527	K	Calnexin OS=Homo sapiens OX=9606 GN=CANX PE=1 SV=2	CANX	1	0.014782	46.88	GTLSGWILSK(1)AK	3	-0.67335	1	0.807	0.786	0.712	1.226	1.112	1.152
Cellular Component	GO:0098552	4	side of membrane	0.00138653	Q13009	564	2.554	Up	2.264e-05	K	T-lymphoma invasion and metastasis-inducing protein 1 OS=Homo sapiens OX=9606 GN=TIAM1 PE=1 SV=2	TIAM1	1	0.00536023	86.794	LLK(1)SEIK	3	-0.69534	1	0.501	0.52	0.54	1.387	1.234	1.366
Cellular Component	GO:0098552	4	side of membrane	0.00138653	P17301	261	4.97	Up	7.7205e-05	K	Integrin alpha-2 OS=Homo sapiens OX=9606 GN=ITGA2 PE=1 SV=1	ITGA2	1	5.75495e-08	138.89	K(1)YAYSAASGGR	2	-0.52946	1	0.253	0.307	0.334	1.631	1.406	1.406
Cellular Component	GO:0031226	7	intrinsic component of plasma membrane	0.00610441	P35232	202	1.61	Up	6.4106e-05	K	Prohibitin OS=Homo sapiens OX=9606 GN=PHB PE=1 SV=1	PHB	1	8.49153e-05	104.22	FVVEK(1)AEQQK	3	1.0761	1	0.727	0.772	0.707	1.186	1.162	1.203
Cellular Component	GO:0031226	7	intrinsic component of plasma membrane	0.00610441	P18564	548	1.991	Up	0.0032991	K	Integrin beta-6 OS=Homo sapiens OX=9606 GN=ITGB6 PE=1 SV=2	ITGB6	1	9.92231e-07	77.037	HK(1)GLLCGGNGDCDCGECVCR	3	-0.47256	1	0.5	0.688	0.699	1.2	1.299	1.258
Cellular Component	GO:0031226	7	intrinsic component of plasma membrane	0.00610441	P23229	144	3.768	Up	1.57151e-05	K	Integrin alpha-6 OS=Homo sapiens OX=9606 GN=ITGA6 PE=1 SV=5	ITGA6	1	3.1719e-06	130.01	QHVNTK(1)QESR	2	1.0391	2	0.354	0.398	0.382	1.474	1.325	1.474
Cellular Component	GO:0031226	7	intrinsic component of plasma membrane	0.00610441	P23229	594	2.852	Up	0.0097615	K	Integrin alpha-6 OS=Homo sapiens OX=9606 GN=ITGA6 PE=1 SV=5	ITGA6	1	0.0014851	102.53	YTQELTLK(1)R	2	0.55207	2	0.382	0.524	0.521	1.331	1.345	1.394
Cellular Component	GO:0031226	7	intrinsic component of plasma membrane	0.00610441	P13726	233	2.168	Up	0.00033987	K	Tissue factor OS=Homo sapiens OX=9606 GN=F3 PE=1 SV=1	F3	1	2.77667e-05	95.57	K(1)STDSPVECMGQEK	3	2.065	1	0.588	0.527	0.659	1.34	1.252	1.254
Cellular Component	GO:0031226	7	intrinsic component of plasma membrane	0.00610441	O75487	44	1.652	Up	4.6607e-06	K	Glypican-4 OS=Homo sapiens OX=9606 GN=GPC4 PE=1 SV=4	GPC4	1	1.65724e-10	118.72	GFNK(1)NDAPLHEINGDHLK	4	0.22408	2	0.727	0.708	0.733	1.228	1.179	1.174
Cellular Component	GO:0031226	7	intrinsic component of plasma membrane	0.00610441	P13987	90	2.086	Up	2.1035e-06	K	CD59 glycoprotein OS=Homo sapiens OX=9606 GN=CD59 PE=1 SV=1	CD59	1	3.9152e-08	141.13	ENELTYYCCK(1)K	2	-0.33008	2	0.61	0.612	0.605	1.303	1.29	1.218
Cellular Component	GO:0031226	7	intrinsic component of plasma membrane	0.00610441	P13987	66	1.753	Up	0.00061964	K	CD59 glycoprotein OS=Homo sapiens OX=9606 GN=CD59 PE=1 SV=1	CD59	1	4.46545e-17	135.72	CWK(1)FEHCNFNDVTTR	3	-2.6005	1	0.661	0.66	0.756	1.253	1.26	1.128
Cellular Component	GO:0031226	7	intrinsic component of plasma membrane	0.00610441	Q03135	57	1.523	Up	0.0012176	K	Caveolin-1 OS=Homo sapiens OX=9606 GN=CAV1 PE=1 SV=4	CAV1	1	0.00201216	67.997	DPK(1)HLNDDVVK	3	1.0261	1	0.694	0.781	0.816	1.145	1.139	1.206
Cellular Component	GO:0031226	7	intrinsic component of plasma membrane	0.00610441	P04920	893	4.44	Up	4.2628e-05	K	Anion exchange protein 2 OS=Homo sapiens OX=9606 GN=SLC4A2 PE=1 SV=4	SLC4A2	1	2.23352e-06	112.42	SLAGQSGQGK(1)PR	2	-2.3535	1	0.287	0.375	0.323	1.476	1.415	1.482
Cellular Component	GO:0031226	7	intrinsic component of plasma membrane	0.00610441	P16422	106	1.604	Up	9.7064e-05	K	Epithelial cell adhesion molecule OS=Homo sapiens OX=9606 GN=EPCAM PE=1 SV=2	EPCAM	1	1.06393e-16	97.771	AKPEGALQNNDGLYDPDCDESGLFK(1)AK	4	-0.73346	3	0.778	0.711	0.724	1.211	1.164	1.175
Cellular Component	GO:0031226	7	intrinsic component of plasma membrane	0.00610441	P16422	160	10.663	Up	1.6533e-07	K	Epithelial cell adhesion molecule OS=Homo sapiens OX=9606 GN=EPCAM PE=1 SV=2	EPCAM	1	0.000107872	110.08	EKPYDSK(1)SLR	2	-0.057166	2	0.152	0.147	0.146	1.691	1.532	1.522
Cellular Component	GO:0031226	7	intrinsic component of plasma membrane	0.00610441	O75323	75	7.133	Up	3.9428e-07	K	Protein NipSnap homolog 2 OS=Homo sapiens OX=9606 GN=NIPSNAP2 PE=1 SV=1	NIPSNAP2	1	7.14122e-32	147.11	ETSNLYK(1)LQFHNVKPECLEAYNK	4	-0.2199	7	0.215	0.206	0.225	1.621	1.5	1.487
Cellular Component	GO:0031226	7	intrinsic component of plasma membrane	0.00610441	Q14247	161	1.788	Up	3.79e-05	K	Src substrate cortactin OS=Homo sapiens OX=9606 GN=CTTN PE=1 SV=2	CTTN	1	5.64477e-17	133.78	DYSSGFGGK(1)YGVQADR	2	0.1629	2	0.677	0.659	0.712	1.252	1.23	1.179
Cellular Component	GO:0031226	7	intrinsic component of plasma membrane	0.00610441	Q14247	198	1.588	Up	0.00024373	K	Src substrate cortactin OS=Homo sapiens OX=9606 GN=CTTN PE=1 SV=2	CTTN	1	6.55628e-07	113.24	GFGGK(1)YGIDK	3	-0.15514	2	0.734	0.77	0.724	1.251	1.119	1.169
Cellular Component	GO:0031226	7	intrinsic component of plasma membrane	0.00610441	P08174	161	4.927	Up	1.8954e-06	K	Complement decay-accelerating factor OS=Homo sapiens OX=9606 GN=CD55 PE=1 SV=4	CD55	1	0.000511591	92.611	K(1)SCPNPGEIR	2	-0.92109	3	0.289	0.285	0.326	1.505	1.493	1.436
Cellular Component	GO:0031226	7	intrinsic component of plasma membrane	0.00610441	O95858	150	3.044	Up	4.4605e-08	K	Tetraspanin-15 OS=Homo sapiens OX=9606 GN=TSPAN15 PE=1 SV=1	TSPAN15	1	0.000671673	121.9	NIMDFVQK(1)K	2	-0.46164	1	0.453	0.46	0.442	1.365	1.376	1.384
Cellular Component	GO:0031226	7	intrinsic component of plasma membrane	0.00610441	P17301	261	4.97	Up	7.7205e-05	K	Integrin alpha-2 OS=Homo sapiens OX=9606 GN=ITGA2 PE=1 SV=1	ITGA2	1	5.75495e-08	138.89	K(1)YAYSAASGGR	2	-0.52946	1	0.253	0.307	0.334	1.631	1.406	1.406
Cellular Component	GO:0005791	9	rough endoplasmic reticulum	0.234586	P27824	87	1.514	Up	0.00095527	K	Calnexin OS=Homo sapiens OX=9606 GN=CANX PE=1 SV=2	CANX	1	0.014782	46.88	GTLSGWILSK(1)AK	3	-0.67335	1	0.807	0.786	0.712	1.226	1.112	1.152
Cellular Component	GO:0005791	9	rough endoplasmic reticulum	0.234586	P04843	187	2.143	Up	1.58621e-05	K	Dolichyl-diphosphooligosaccharide--protein glycosyltransferase subunit 1 OS=Homo sapiens OX=9606 GN=RPN1 PE=1 SV=1	RPN1	1	1.75673e-17	156.17	NVESYTK(1)LGNPTR	2	-0.077266	1	0.57	0.614	0.604	1.244	1.32	1.267
Cellular Component	GO:0005791	9	rough endoplasmic reticulum	0.234586	P04844	442	1.522	Up	0.0020441	K	Dolichyl-diphosphooligosaccharide--protein glycosyltransferase subunit 2 OS=Homo sapiens OX=9606 GN=RPN2 PE=1 SV=3	RPN2	1	9.65183e-11	115.57	LHNQK(1)TGQEVVFVAEPDNK	3	-0.45133	1	0.74	0.848	0.707	1.198	1.112	1.182
Cellular Component	GO:0005791	9	rough endoplasmic reticulum	0.234586	P04844	311	1.701	Up	0.00068179	K	Dolichyl-diphosphooligosaccharide--protein glycosyltransferase subunit 2 OS=Homo sapiens OX=9606 GN=RPN2 PE=1 SV=3	RPN2	1	3.52812e-05	124.06	LEHAK(1)SVASR	2	-0.83563	2	0.647	0.769	0.706	1.219	1.246	1.144
Cellular Component	GO:0071010	11	prespliceosome	0.110097	Q15428	10	1.614	Up	0.0156602	K	Splicing factor 3A subunit 2 OS=Homo sapiens OX=9606 GN=SF3A2 PE=1 SV=2	SF3A2	1	1.3659e-26	154.07	PGGK(1)TGSGGVASSSESNR	2	0.58071	2	0.71	0.876	0.616	1.25	1.04	1.265
Cellular Component	GO:0071010	11	prespliceosome	0.110097	P26368	462	1.533	Up	0.00065807	K	Splicing factor U2AF 65 kDa subunit OS=Homo sapiens OX=9606 GN=U2AF2 PE=1 SV=4	U2AF2	1	0.000151529	86.944	VVVTK(1)YCDPDSYHR	3	-0.73037	2	0.702	0.77	0.809	1.15	1.143	1.203
Cellular Component	GO:0071010	11	prespliceosome	0.110097	Q15459	754	1.678	Up	0.0092791	K	Splicing factor 3A subunit 1 OS=Homo sapiens OX=9606 GN=SF3A1 PE=1 SV=1	SF3A1	1	0.000115335	90.614	IHEATGMPAGK(1)QK	3	1.5095	1	0.66	0.661	0.823	1.204	1.365	1.029
Cellular Component	GO:0005776	9	autophagosome	0.250745	P04844	442	1.522	Up	0.0020441	K	Dolichyl-diphosphooligosaccharide--protein glycosyltransferase subunit 2 OS=Homo sapiens OX=9606 GN=RPN2 PE=1 SV=3	RPN2	1	9.65183e-11	115.57	LHNQK(1)TGQEVVFVAEPDNK	3	-0.45133	1	0.74	0.848	0.707	1.198	1.112	1.182
Cellular Component	GO:0005776	9	autophagosome	0.250745	P04844	311	1.701	Up	0.00068179	K	Dolichyl-diphosphooligosaccharide--protein glycosyltransferase subunit 2 OS=Homo sapiens OX=9606 GN=RPN2 PE=1 SV=3	RPN2	1	3.52812e-05	124.06	LEHAK(1)SVASR	2	-0.83563	2	0.647	0.769	0.706	1.219	1.246	1.144
Cellular Component	GO:0005776	9	autophagosome	0.250745	Q8TBX8	99	1.512	Up	0.0178419	K	Phosphatidylinositol 5-phosphate 4-kinase type-2 gamma OS=Homo sapiens OX=9606 GN=PIP4K2C PE=1 SV=3	PIP4K2C	1	6.30063e-05	96.229	ENLPSHFK(1)FK	3	1.5003	1	0.766	0.805	0.732	1.171	0.957	1.353
Cellular Component	GO:0005657	10	replication fork	0.201115	P11387	252	1.611	Up	0.0086001	K	DNA topoisomerase 1 OS=Homo sapiens OX=9606 GN=TOP1 PE=1 SV=2	TOP1	1	0.00441055	51.771	LSPK(1)AEEVATFFAK	3	-3.501	1	0.684	0.692	0.831	1.198	1.332	1.025
Cellular Component	GO:0005657	10	replication fork	0.201115	P11387	218	1.572	Up	0.0049752	K	DNA topoisomerase 1 OS=Homo sapiens OX=9606 GN=TOP1 PE=1 SV=2	TOP1	1	0.00578621	85.212	WK(1)FLEHK	3	-0.5485	1	0.654	0.728	0.858	1.154	1.144	1.224
Cellular Component	GO:0005657	10	replication fork	0.201115	P27694	163	2.076	Up	1.81648e-05	K	Replication protein A 70 kDa DNA-binding subunit OS=Homo sapiens OX=9606 GN=RPA1 PE=1 SV=2	RPA1	1	9.99335e-08	143.97	AYGASK(1)TFGK	3	1.1683	2	0.616	0.618	0.6	1.341	1.243	1.224
Cellular Component	GO:0005657	10	replication fork	0.201115	Q96T88	546	1.987	Up	0.0040585	K	E3 ubiquitin-protein ligase UHRF1 OS=Homo sapiens OX=9606 GN=UHRF1 PE=1 SV=1	UHRF1	1	0.000183326	96.059	NSK(1)YAPAEGNR	2	0.1761	1	0.675	0.581	0.638	1.244	1.265	1.255
Cellular Component	GO:0031225	5	anchored component of membrane	0.00174721	O75487	44	1.652	Up	4.6607e-06	K	Glypican-4 OS=Homo sapiens OX=9606 GN=GPC4 PE=1 SV=4	GPC4	1	1.65724e-10	118.72	GFNK(1)NDAPLHEINGDHLK	4	0.22408	2	0.727	0.708	0.733	1.228	1.179	1.174
Cellular Component	GO:0031225	5	anchored component of membrane	0.00174721	P13987	90	2.086	Up	2.1035e-06	K	CD59 glycoprotein OS=Homo sapiens OX=9606 GN=CD59 PE=1 SV=1	CD59	1	3.9152e-08	141.13	ENELTYYCCK(1)K	2	-0.33008	2	0.61	0.612	0.605	1.303	1.29	1.218
Cellular Component	GO:0031225	5	anchored component of membrane	0.00174721	P13987	66	1.753	Up	0.00061964	K	CD59 glycoprotein OS=Homo sapiens OX=9606 GN=CD59 PE=1 SV=1	CD59	1	4.46545e-17	135.72	CWK(1)FEHCNFNDVTTR	3	-2.6005	1	0.661	0.66	0.756	1.253	1.26	1.128
Cellular Component	GO:0031225	5	anchored component of membrane	0.00174721	P08174	161	4.927	Up	1.8954e-06	K	Complement decay-accelerating factor OS=Homo sapiens OX=9606 GN=CD55 PE=1 SV=4	CD55	1	0.000511591	92.611	K(1)SCPNPGEIR	2	-0.92109	3	0.289	0.285	0.326	1.505	1.493	1.436
Cellular Component	GO:0008305	9	integrin complex	0.0421578	P18564	548	1.991	Up	0.0032991	K	Integrin beta-6 OS=Homo sapiens OX=9606 GN=ITGB6 PE=1 SV=2	ITGB6	1	9.92231e-07	77.037	HK(1)GLLCGGNGDCDCGECVCR	3	-0.47256	1	0.5	0.688	0.699	1.2	1.299	1.258
Cellular Component	GO:0008305	9	integrin complex	0.0421578	P23229	144	3.768	Up	1.57151e-05	K	Integrin alpha-6 OS=Homo sapiens OX=9606 GN=ITGA6 PE=1 SV=5	ITGA6	1	3.1719e-06	130.01	QHVNTK(1)QESR	2	1.0391	2	0.354	0.398	0.382	1.474	1.325	1.474
Cellular Component	GO:0008305	9	integrin complex	0.0421578	P23229	594	2.852	Up	0.0097615	K	Integrin alpha-6 OS=Homo sapiens OX=9606 GN=ITGA6 PE=1 SV=5	ITGA6	1	0.0014851	102.53	YTQELTLK(1)R	2	0.55207	2	0.382	0.524	0.521	1.331	1.345	1.394
Cellular Component	GO:0008305	9	integrin complex	0.0421578	P17301	261	4.97	Up	7.7205e-05	K	Integrin alpha-2 OS=Homo sapiens OX=9606 GN=ITGA2 PE=1 SV=1	ITGA2	1	5.75495e-08	138.89	K(1)YAYSAASGGR	2	-0.52946	1	0.253	0.307	0.334	1.631	1.406	1.406
Cellular Component	GO:0016235	7	aggresome	0.157366	Q9NRD5	88	2.812	Up	3.5799e-06	K	PRKCA-binding protein OS=Homo sapiens OX=9606 GN=PICK1 PE=1 SV=2	PICK1	1	0.0229749	55.261	VEVAK(1)MIQEVK	2	0.85616	1	0.484	0.504	0.458	1.401	1.307	1.358
Cellular Component	GO:0016235	7	aggresome	0.157366	P13639	32	1.652	Up	0.0028208	K	Elongation factor 2 OS=Homo sapiens OX=9606 GN=EEF2 PE=1 SV=4	EEF2	1	0.000910029	50.858	NMSVIAHVDHGK(1)STLTDSLVCK	4	-0.77941	1	0.655	0.728	0.777	1.058	1.229	1.282
Cellular Component	GO:0042581	11	specific granule	0.243116	Q07065	301	1.726	Up	0.0034984	K	Cytoskeleton-associated protein 4 OS=Homo sapiens OX=9606 GN=CKAP4 PE=1 SV=2	CKAP4	1	0.00142164	100.92	EIQTSAK(1)SR	2	-1.0848	1	0.759	0.586	0.755	1.211	1.151	1.262
Cellular Component	GO:0042581	11	specific granule	0.243116	Q13813	296	1.717	Up	0.0100175	K	Spectrin alpha chain, non-erythrocytic 1 OS=Homo sapiens OX=9606 GN=SPTAN1 PE=1 SV=3	SPTAN1	1	0.0243338	65.246	K(1)HEGLER	3	1.0588	1	0.744	0.691	0.678	1.258	1.405	0.965
Cellular Component	GO:0042581	11	specific granule	0.243116	Q7L576	1188	1.882	Up	5.6212e-05	K	Cytoplasmic FMR1-interacting protein 1 OS=Homo sapiens OX=9606 GN=CYFIP1 PE=1 SV=1	CYFIP1	0.999952	0.000231257	89.231	VQK(1)HDGKDEIIK	4	-1.3205	2	0.634	0.688	0.65	1.296	1.192	1.224
Cellular Component	GO:0042581	11	specific granule	0.243116	P13987	90	2.086	Up	2.1035e-06	K	CD59 glycoprotein OS=Homo sapiens OX=9606 GN=CD59 PE=1 SV=1	CD59	1	3.9152e-08	141.13	ENELTYYCCK(1)K	2	-0.33008	2	0.61	0.612	0.605	1.303	1.29	1.218
Cellular Component	GO:0042581	11	specific granule	0.243116	P13987	66	1.753	Up	0.00061964	K	CD59 glycoprotein OS=Homo sapiens OX=9606 GN=CD59 PE=1 SV=1	CD59	1	4.46545e-17	135.72	CWK(1)FEHCNFNDVTTR	3	-2.6005	1	0.661	0.66	0.756	1.253	1.26	1.128
Cellular Component	GO:0005686	12	U2 snRNP	0.345341	Q15428	10	1.614	Up	0.0156602	K	Splicing factor 3A subunit 2 OS=Homo sapiens OX=9606 GN=SF3A2 PE=1 SV=2	SF3A2	1	1.3659e-26	154.07	PGGK(1)TGSGGVASSSESNR	2	0.58071	2	0.71	0.876	0.616	1.25	1.04	1.265
Cellular Component	GO:0005686	12	U2 snRNP	0.345341	Q15459	754	1.678	Up	0.0092791	K	Splicing factor 3A subunit 1 OS=Homo sapiens OX=9606 GN=SF3A1 PE=1 SV=1	SF3A1	1	0.000115335	90.614	IHEATGMPAGK(1)QK	3	1.5095	1	0.66	0.661	0.823	1.204	1.365	1.029
Cellular Component	GO:0016528	7	sarcoplasm	0.345341	Q12797	336	1.771	Up	0.0099388	K	Aspartyl/asparaginyl beta-hydroxylase OS=Homo sapiens OX=9606 GN=ASPH PE=1 SV=3	ASPH	1	0.0197409	87.476	LLNK(1)FDK	2	2.2137	1	0.759	0.622	0.682	1.221	1.227	1.206
Cellular Component	GO:0016528	7	sarcoplasm	0.345341	Q13557	268	2.448	Up	0.00064196	K	Calcium/calmodulin-dependent protein kinase type II subunit delta OS=Homo sapiens OX=9606 GN=CAMK2D PE=1 SV=3	CAMK2D	1	9.73432e-06	94.09	ITASEALK(1)HPWICQR	3	-2.1026	1	0.448	0.594	0.572	1.394	1.259	1.298
Cellular Component	GO:0031674	11	I band	0.234586	P21333	994	1.525	Up	1.9772e-05	K	Filamin-A OS=Homo sapiens OX=9606 GN=FLNA PE=1 SV=4	FLNA	1	0.00346172	85.813	DQEFTVK(1)SK	3	-0.051795	2	0.786	0.743	0.763	1.155	1.183	1.157
Cellular Component	GO:0031674	11	I band	0.234586	P04075	200	1.909	Up	0.00039957	K	Fructose-bisphosphate aldolase A OS=Homo sapiens OX=9606 GN=ALDOA PE=1 SV=2	ALDOA	1	1.06057e-28	125	YASICQQNGIVPIVEPEILPDGDHDLK(1)R	3	-1.6772	8	0.693	0.577	0.681	1.214	1.249	1.262
Cellular Component	GO:0031674	11	I band	0.234586	P04075	108	1.531	Up	0.00098334	K	Fructose-bisphosphate aldolase A OS=Homo sapiens OX=9606 GN=ALDOA PE=1 SV=2	ALDOA	1	0.000445929	92.866	GGVVGIK(1)VDK	2	0.15856	1	0.727	0.722	0.837	1.193	1.157	1.149
Cellular Component	GO:0031674	11	I band	0.234586	O43707	779	1.506	Up	4.621e-06	K	Alpha-actinin-4 OS=Homo sapiens OX=9606 GN=ACTN4 PE=1 SV=2	ACTN4	1	2.1119e-07	92.098	ASFNHFDK(1)DHGGALGPEEFK	4	-0.48137	1	0.769	0.755	0.788	1.156	1.148	1.177
Cellular Component	GO:0031304	14	intrinsic component of mitochondrial inner membrane	0.0615606	Q9NX63	173	1.607	Up	2.6912e-07	K	MICOS complex subunit MIC19 OS=Homo sapiens OX=9606 GN=CHCHD3 PE=1 SV=1	CHCHD3	1	0.000353452	107.06	AAEEVEAK(1)FK	3	0.05199	2	0.732	0.744	0.733	1.173	1.179	1.198
Cellular Component	GO:0031304	14	intrinsic component of mitochondrial inner membrane	0.0615606	Q9NX63	45	7.858	Up	1.602e-05	K	MICOS complex subunit MIC19 OS=Homo sapiens OX=9606 GN=CHCHD3 PE=1 SV=1	CHCHD3	1	3.73343e-07	132.5	ESSPSGSK(1)SQR	2	0.84753	1	0.18	0.184	0.227	1.612	1.552	1.48
Cellular Component	GO:0031304	14	intrinsic component of mitochondrial inner membrane	0.0615606	Q16891	102	2.142	Up	0.000164333	K	MICOS complex subunit MIC60 OS=Homo sapiens OX=9606 GN=IMMT PE=1 SV=1	IMMT	1	0.00406596	74.841	K(1)SIQSGPLK	3	0.37176	2	0.589	0.646	0.554	1.229	1.365	1.238
Cellular Component	GO:0031304	14	intrinsic component of mitochondrial inner membrane	0.0615606	Q9BRQ6	114	2.999	Up	0.00020123	K	MICOS complex subunit MIC25 OS=Homo sapiens OX=9606 GN=CHCHD6 PE=1 SV=1	CHCHD6	1	0.00655234	74.301	EAATK(1)HSK	3	1.3693	1	0.495	0.401	0.479	1.488	1.397	1.239
Cellular Component	GO:0061617	16	MICOS complex	0.00636239	Q9NX63	173	1.607	Up	2.6912e-07	K	MICOS complex subunit MIC19 OS=Homo sapiens OX=9606 GN=CHCHD3 PE=1 SV=1	CHCHD3	1	0.000353452	107.06	AAEEVEAK(1)FK	3	0.05199	2	0.732	0.744	0.733	1.173	1.179	1.198
Cellular Component	GO:0061617	16	MICOS complex	0.00636239	Q9NX63	45	7.858	Up	1.602e-05	K	MICOS complex subunit MIC19 OS=Homo sapiens OX=9606 GN=CHCHD3 PE=1 SV=1	CHCHD3	1	3.73343e-07	132.5	ESSPSGSK(1)SQR	2	0.84753	1	0.18	0.184	0.227	1.612	1.552	1.48
Cellular Component	GO:0061617	16	MICOS complex	0.00636239	Q16891	102	2.142	Up	0.000164333	K	MICOS complex subunit MIC60 OS=Homo sapiens OX=9606 GN=IMMT PE=1 SV=1	IMMT	1	0.00406596	74.841	K(1)SIQSGPLK	3	0.37176	2	0.589	0.646	0.554	1.229	1.365	1.238
Cellular Component	GO:0061617	16	MICOS complex	0.00636239	Q9BRQ6	114	2.999	Up	0.00020123	K	MICOS complex subunit MIC25 OS=Homo sapiens OX=9606 GN=CHCHD6 PE=1 SV=1	CHCHD6	1	0.00655234	74.301	EAATK(1)HSK	3	1.3693	1	0.495	0.401	0.479	1.488	1.397	1.239
Cellular Component	GO:0044815	3	DNA packaging complex	0.0520204	Q99525	17	1.747	Up	0.020535	K	Histone H4-like protein type G OS=Homo sapiens OX=9606 GN=HIST1H4G PE=1 SV=1	HIST1H4G	1	0.00152844	84.31	GLGK(1)GGAK(1)CHR	3	1.0158	1	0.68	0.775	0.62	1.094	0.996	1.535
Cellular Component	GO:0044815	3	DNA packaging complex	0.0520204	P10412	63	1.615	Up	2.6726e-09	K	Histone H1.4 OS=Homo sapiens OX=9606 GN=H1-4 PE=1 SV=2	H1-4	1	0.000637306	85.355	SGVSLAALK(1)K	3	0.16261	1	0.734	0.735	0.733	1.191	1.181	1.184
Cellular Component	GO:0044815	3	DNA packaging complex	0.0520204	P62805	92	2.182	Up	1.6411e-05	K	Histone H4 OS=Homo sapiens OX=9606 GN=H4C1 PE=1 SV=2	H4C1	1	6.24962e-36	186.16	TVTAMDVVYALK(1)R	2	-0.23684	16	0.562	0.581	0.621	1.289	1.292	1.268
Cellular Component	GO:0044815	3	DNA packaging complex	0.0520204	P62805	32	1.653	Up	0.0134408	K	Histone H4 OS=Homo sapiens OX=9606 GN=H4C1 PE=1 SV=2	H4C1	1	3.04485e-08	128.68	DNIQGITK(1)PAIR	2	0.4573	2	0.677	0.679	0.809	1.203	1.199	1.177
Cellular Component	GO:0044815	3	DNA packaging complex	0.0520204	P62805	80	2.391	Up	2.114e-07	K	Histone H4 OS=Homo sapiens OX=9606 GN=H4C1 PE=1 SV=2	H4C1	1	3.87738e-17	153.23	K(1)TVTAMDVVYALK(1)R	3	-0.75923	21	0.556	0.541	0.548	1.342	1.293	1.298
Cellular Component	GO:0044815	3	DNA packaging complex	0.0520204	P62805	78	1.846	Up	1.73873e-05	K	Histone H4 OS=Homo sapiens OX=9606 GN=H4C1 PE=1 SV=2	H4C1	1	3.72767e-11	151.98	DAVTYTEHAK(1)R	2	0.33428	3	0.693	0.658	0.65	1.26	1.199	1.235
Cellular Component	GO:0044815	3	DNA packaging complex	0.0520204	P62805	17	1.611	Up	2.4396e-05	K	Histone H4 OS=Homo sapiens OX=9606 GN=H4C1 PE=1 SV=2	H4C1	1	1.37446e-45	190.24	GLGK(1)GGAK(1)R	2	-1.3239	136	0.728	0.747	0.73	1.202	1.136	1.215
Cellular Component	GO:0044815	3	DNA packaging complex	0.0520204	Q96KK5	37	1.556	Up	0.00027896	K	Histone H2A type 1-H OS=Homo sapiens OX=9606 GN=HIST1H2AH PE=1 SV=3	HIST1H2AH	1	0.012122	96.311	K(1)GNYAER	2	0.80708	1	0.728	0.743	0.79	1.238	1.142	1.138
Cellular Component	GO:0044815	3	DNA packaging complex	0.0520204	Q96KK5	96	1.532	Up	0.000135907	K	Histone H2A type 1-H OS=Homo sapiens OX=9606 GN=HIST1H2AH PE=1 SV=3	HIST1H2AH	1	3.40253e-08	141.58	NDEELNK(1)LLGK	2	-0.23047	2	0.728	0.792	0.764	1.153	1.204	1.141
Cellular Component	GO:0044815	3	DNA packaging complex	0.0520204	Q96KK5	126	1.639	Up	7.7928e-05	K	Histone H2A type 1-H OS=Homo sapiens OX=9606 GN=HIST1H2AH PE=1 SV=3	HIST1H2AH	1	0.00072571	91.318	TESHHK(1)AK	3	0.69454	6	0.726	0.693	0.76	1.222	1.176	1.174
Cellular Component	GO:0044815	3	DNA packaging complex	0.0520204	Q71DI3	19	1.533	Up	0.034541	K	Histone H3.2 OS=Homo sapiens OX=9606 GN=HIST2H3A PE=1 SV=3	HIST2H3A	1	2.45577e-18	167.09	STGGK(1)APRK(1)QLATK(1)AAR	2	0.22427	41	0.669	0.886	0.726	1.238	0.937	1.322
Cellular Component	GO:0044815	3	DNA packaging complex	0.0520204	Q71DI3	10	1.777	Up	3.3362e-06	K	Histone H3.2 OS=Homo sapiens OX=9606 GN=HIST2H3A PE=1 SV=3	HIST2H3A	1	0.00024356	111.61	QTARK(1)STGGK(1)APR	2	0.94869	19	0.696	0.688	0.673	1.253	1.186	1.216
Cellular Component	GO:0044815	3	DNA packaging complex	0.0520204	P0C0S5	8	2.197	Up	4.9094e-07	K	Histone H2A.Z OS=Homo sapiens OX=9606 GN=H2AZ1 PE=1 SV=2	H2AZ1	1	2.41356e-07	111.64	AGK(1)DSGK(1)AK(1)TK	2	0.79948	12	0.591	0.582	0.583	1.323	1.257	1.278
Cellular Component	GO:0044815	3	DNA packaging complex	0.0520204	P0C0S5	12	2.225	Up	3.9617e-07	K	Histone H2A.Z OS=Homo sapiens OX=9606 GN=H2AZ1 PE=1 SV=2	H2AZ1	1	2.41356e-07	111.64	AGK(1)DSGK(1)AK(1)TK	2	0.79948	10	0.585	0.579	0.575	1.326	1.264	1.279
Cellular Component	GO:0044815	3	DNA packaging complex	0.0520204	P0C0S5	5	1.669	Up	5.8561e-05	K	Histone H2A.Z OS=Homo sapiens OX=9606 GN=H2AZ1 PE=1 SV=2	H2AZ1	1	2.41356e-07	111.64	AGGK(1)AGK(1)DSGK(1)AK(1)TK	2	0.11281	10	0.749	0.714	0.689	1.227	1.164	1.201
Cellular Component	GO:0044815	3	DNA packaging complex	0.0520204	P0C0S5	14	2.729	Up	2.1717e-06	K	Histone H2A.Z OS=Homo sapiens OX=9606 GN=H2AZ1 PE=1 SV=2	H2AZ1	1	2.41356e-07	106.57	AGK(1)DSGK(1)AK(1)TK	2	0.79948	4	0.511	0.491	0.48	1.402	1.295	1.348
Cellular Component	GO:0044815	3	DNA packaging complex	0.0520204	Q71UI9	8	1.776	Up	7.1996e-08	K	Histone H2A.V OS=Homo sapiens OX=9606 GN=H2AFV PE=1 SV=3	H2AFV	1	5.25348e-06	111.64	AGK(1)DSGK(1)AK(1)AK	2	0.56256	10	0.682	0.683	0.692	1.231	1.214	1.209
Cellular Component	GO:0044815	3	DNA packaging complex	0.0520204	Q71UI9	12	1.771	Up	4.7604e-08	K	Histone H2A.V OS=Homo sapiens OX=9606 GN=H2AFV PE=1 SV=3	H2AFV	1	5.25348e-06	111.64	AGK(1)DSGK(1)AK(1)AK	2	0.56256	8	0.684	0.688	0.689	1.228	1.219	1.203
Cellular Component	GO:0044815	3	DNA packaging complex	0.0520204	Q71UI9	14	1.84	Up	6.056e-07	K	Histone H2A.V OS=Homo sapiens OX=9606 GN=H2AFV PE=1 SV=3	H2AFV	1	0.00142022	96.464	AGK(1)DSGK(1)AK(1)AK	2	0.56256	2	0.675	0.674	0.655	1.23	1.211	1.247
Cellular Component	GO:0000791	11	euchromatin	0.250745	P0C0S5	8	2.197	Up	4.9094e-07	K	Histone H2A.Z OS=Homo sapiens OX=9606 GN=H2AZ1 PE=1 SV=2	H2AZ1	1	2.41356e-07	111.64	AGK(1)DSGK(1)AK(1)TK	2	0.79948	12	0.591	0.582	0.583	1.323	1.257	1.278
Cellular Component	GO:0000791	11	euchromatin	0.250745	P0C0S5	12	2.225	Up	3.9617e-07	K	Histone H2A.Z OS=Homo sapiens OX=9606 GN=H2AZ1 PE=1 SV=2	H2AZ1	1	2.41356e-07	111.64	AGK(1)DSGK(1)AK(1)TK	2	0.79948	10	0.585	0.579	0.575	1.326	1.264	1.279
Cellular Component	GO:0000791	11	euchromatin	0.250745	P0C0S5	5	1.669	Up	5.8561e-05	K	Histone H2A.Z OS=Homo sapiens OX=9606 GN=H2AZ1 PE=1 SV=2	H2AZ1	1	2.41356e-07	111.64	AGGK(1)AGK(1)DSGK(1)AK(1)TK	2	0.11281	10	0.749	0.714	0.689	1.227	1.164	1.201
Cellular Component	GO:0000791	11	euchromatin	0.250745	P0C0S5	14	2.729	Up	2.1717e-06	K	Histone H2A.Z OS=Homo sapiens OX=9606 GN=H2AZ1 PE=1 SV=2	H2AZ1	1	2.41356e-07	106.57	AGK(1)DSGK(1)AK(1)TK	2	0.79948	4	0.511	0.491	0.48	1.402	1.295	1.348
Cellular Component	GO:0000791	11	euchromatin	0.250745	Q96T88	546	1.987	Up	0.0040585	K	E3 ubiquitin-protein ligase UHRF1 OS=Homo sapiens OX=9606 GN=UHRF1 PE=1 SV=1	UHRF1	1	0.000183326	96.059	NSK(1)YAPAEGNR	2	0.1761	1	0.675	0.581	0.638	1.244	1.265	1.255
Cellular Component	GO:0070161	3	anchoring junction	0.00863695	P18124	223	1.556	Up	0.00049647	K	60S ribosomal protein L7 OS=Homo sapiens OX=9606 GN=RPL7 PE=1 SV=1	RPL7	1	2.59475e-29	179.94	K(1)TTHFVEGGDAGNREDQINR	3	-0.098351	4	0.789	0.778	0.693	1.183	1.144	1.19
Cellular Component	GO:0070161	3	anchoring junction	0.00863695	P23229	144	3.768	Up	1.57151e-05	K	Integrin alpha-6 OS=Homo sapiens OX=9606 GN=ITGA6 PE=1 SV=5	ITGA6	1	3.1719e-06	130.01	QHVNTK(1)QESR	2	1.0391	2	0.354	0.398	0.382	1.474	1.325	1.474
Cellular Component	GO:0070161	3	anchoring junction	0.00863695	P23229	594	2.852	Up	0.0097615	K	Integrin alpha-6 OS=Homo sapiens OX=9606 GN=ITGA6 PE=1 SV=5	ITGA6	1	0.0014851	102.53	YTQELTLK(1)R	2	0.55207	2	0.382	0.524	0.521	1.331	1.345	1.394
Cellular Component	GO:0070161	3	anchoring junction	0.00863695	Q7L576	1188	1.882	Up	5.6212e-05	K	Cytoplasmic FMR1-interacting protein 1 OS=Homo sapiens OX=9606 GN=CYFIP1 PE=1 SV=1	CYFIP1	0.999952	0.000231257	89.231	VQK(1)HDGKDEIIK	4	-1.3205	2	0.634	0.688	0.65	1.296	1.192	1.224
Cellular Component	GO:0070161	3	anchoring junction	0.00863695	P15880	275	3.946	Up	0.020878	K	40S ribosomal protein S2 OS=Homo sapiens OX=9606 GN=RPS2 PE=1 SV=2	RPS2	1	0.00013314	66.289	SPYQEFTDHLVK(1)THTR	4	-0.31731	1		0.19	0.445	1.296	1.113	1.35
Cellular Component	GO:0070161	3	anchoring junction	0.00863695	Q03135	57	1.523	Up	0.0012176	K	Caveolin-1 OS=Homo sapiens OX=9606 GN=CAV1 PE=1 SV=4	CAV1	1	0.00201216	67.997	DPK(1)HLNDDVVK	3	1.0261	1	0.694	0.781	0.816	1.145	1.139	1.206
Cellular Component	GO:0070161	3	anchoring junction	0.00863695	P62263	106	4.268	Up	8.5519e-07	K	40S ribosomal protein S14 OS=Homo sapiens OX=9606 GN=RPS14 PE=1 SV=3	RPS14	1	0.000851749	84.173	TK(1)TPGPGAQSALR	2	-2.5539	1	0.322	0.351	0.346	1.465	1.393	1.491
Cellular Component	GO:0070161	3	anchoring junction	0.00863695	P62263	96	1.537	Up	0.0272	K	40S ribosomal protein S14 OS=Homo sapiens OX=9606 GN=RPS14 PE=1 SV=3	RPS14	1	7.38528e-07	110.08	ELGITALHIK(1)LR	3	0.52572	2	0.692	0.795	0.788	0.974	1.432	1.09
Cellular Component	GO:0070161	3	anchoring junction	0.00863695	P04920	893	4.44	Up	4.2628e-05	K	Anion exchange protein 2 OS=Homo sapiens OX=9606 GN=SLC4A2 PE=1 SV=4	SLC4A2	1	2.23352e-06	112.42	SLAGQSGQGK(1)PR	2	-2.3535	1	0.287	0.375	0.323	1.476	1.415	1.482
Cellular Component	GO:0070161	3	anchoring junction	0.00863695	P62917	46	1.894	Up	1.75293e-05	K	60S ribosomal protein L8 OS=Homo sapiens OX=9606 GN=RPL8 PE=1 SV=2	RPL8	1	0.000128202	96.464	GIVK(1)DIIHDPGR	2	-0.25301	2	0.668	0.643	0.653	1.287	1.189	1.244
Cellular Component	GO:0070161	3	anchoring junction	0.00863695	O43707	779	1.506	Up	4.621e-06	K	Alpha-actinin-4 OS=Homo sapiens OX=9606 GN=ACTN4 PE=1 SV=2	ACTN4	1	2.1119e-07	92.098	ASFNHFDK(1)DHGGALGPEEFK	4	-0.48137	1	0.769	0.755	0.788	1.156	1.148	1.177
Cellular Component	GO:0070161	3	anchoring junction	0.00863695	Q02878	192	1.535	Up	0.00026491	K	60S ribosomal protein L6 OS=Homo sapiens OX=9606 GN=RPL6 PE=1 SV=3	RPL6	1	0.000693341	75.589	THQK(1)FVIATSTK	3	-0.46954	1	0.74	0.814	0.728	1.184	1.162	1.156
Cellular Component	GO:0070161	3	anchoring junction	0.00863695	P46777	27	1.597	Up	0.00119775	K	60S ribosomal protein L5 OS=Homo sapiens OX=9606 GN=RPL5 PE=1 SV=3	RPL5	1	0.0161426	70.412	EGK(1)TDYYAR	2	-0.47447	2	0.68	0.764	0.777	1.268	1.167	1.111
Cellular Component	GO:0070161	3	anchoring junction	0.00863695	P30101	494	1.633	Up	0.00061616	K	Protein disulfide-isomerase A3 OS=Homo sapiens OX=9606 GN=PDIA3 PE=1 SV=4	PDIA3	1	1.11552e-22	158.91	EATNPPVIQEEK(1)PK	2	-0.21724	3	0.713	0.703	0.767	1.119	1.287	1.158
Cellular Component	GO:0070161	3	anchoring junction	0.00863695	P63261	50	2.044	Up	0.00151871	K	Actin, cytoplasmic 2 OS=Homo sapiens OX=9606 GN=ACTG1 PE=1 SV=1	ACTG1	1	1.73645e-08	74.364	HQGVMVGMGQK(1)DSYVGDEAQSK	3	-0.91047	1	0.53	0.605	0.719	1.328	1.267	1.194
Cellular Component	GO:0070161	3	anchoring junction	0.00863695	Q9Y4L1	991	1.814	Up	0.00105528	K	Hypoxia up-regulated protein 1 OS=Homo sapiens OX=9606 GN=HYOU1 PE=1 SV=1	HYOU1	1	0.0356549	68.657	EQSTGQK(1)R	2	-0.21595	1	0.705	0.586	0.734	1.194	1.25	1.23
Cellular Component	GO:0070161	3	anchoring junction	0.00863695	Q9Y4L1	537	1.679	Up	0.00189553	K	Hypoxia up-regulated protein 1 OS=Homo sapiens OX=9606 GN=HYOU1 PE=1 SV=1	HYOU1	1	2.35366e-05	105.65	KYPDYESK(1)GIK	3	1.7955	1	0.728	0.644	0.773	1.297	1.201	1.103
Cellular Component	GO:0070161	3	anchoring junction	0.00863695	Q14247	161	1.788	Up	3.79e-05	K	Src substrate cortactin OS=Homo sapiens OX=9606 GN=CTTN PE=1 SV=2	CTTN	1	5.64477e-17	133.78	DYSSGFGGK(1)YGVQADR	2	0.1629	2	0.677	0.659	0.712	1.252	1.23	1.179
Cellular Component	GO:0070161	3	anchoring junction	0.00863695	Q14247	198	1.588	Up	0.00024373	K	Src substrate cortactin OS=Homo sapiens OX=9606 GN=CTTN PE=1 SV=2	CTTN	1	6.55628e-07	113.24	GFGGK(1)YGIDK	3	-0.15514	2	0.734	0.77	0.724	1.251	1.119	1.169
Cellular Component	GO:0070161	3	anchoring junction	0.00863695	P17301	261	4.97	Up	7.7205e-05	K	Integrin alpha-2 OS=Homo sapiens OX=9606 GN=ITGA2 PE=1 SV=1	ITGA2	1	5.75495e-08	138.89	K(1)YAYSAASGGR	2	-0.52946	1	0.253	0.307	0.334	1.631	1.406	1.406
Cellular Component	GO:0070161	3	anchoring junction	0.00863695	P21333	994	1.525	Up	1.9772e-05	K	Filamin-A OS=Homo sapiens OX=9606 GN=FLNA PE=1 SV=4	FLNA	1	0.00346172	85.813	DQEFTVK(1)SK	3	-0.051795	2	0.786	0.743	0.763	1.155	1.183	1.157
Cellular Component	GO:0070161	3	anchoring junction	0.00863695	P18564	548	1.991	Up	0.0032991	K	Integrin beta-6 OS=Homo sapiens OX=9606 GN=ITGB6 PE=1 SV=2	ITGB6	1	9.92231e-07	77.037	HK(1)GLLCGGNGDCDCGECVCR	3	-0.47256	1	0.5	0.688	0.699	1.2	1.299	1.258
Cellular Component	GO:0070161	3	anchoring junction	0.00863695	P36507	108	1.663	Up	0.0022007	K	Dual specificity mitogen-activated protein kinase kinase 2 OS=Homo sapiens OX=9606 GN=MAP2K2 PE=1 SV=1	MAP2K2	1	4.9811e-05	95.483	LIHLEIK(1)PAIR	3	-0.84799	1	0.79	0.663	0.705	1.236	1.078	1.275
Cellular Component	GO:0070161	3	anchoring junction	0.00863695	P23528	92	1.643	Up	3.7006e-05	K	Cofilin-1 OS=Homo sapiens OX=9606 GN=CFL1 PE=1 SV=3	CFL1	1	1.70741e-10	121.99	YALYDATYETK(1)ESK	2	0.88008	2	0.714	0.743	0.716	1.144	1.227	1.2
Cellular Component	GO:0070161	3	anchoring junction	0.00863695	P14625	467	2.375	Up	0.00132479	K	Endoplasmin OS=Homo sapiens OX=9606 GN=HSP90B1 PE=1 SV=1	HSP90B1	1	0.0260932	82.287	K(1)TLDMIK	2	-1.9897	1	0.517	0.571	0.564	1.316	1.312	1.296
Cellular Component	GO:0070161	3	anchoring junction	0.00863695	P14625	473	1.531	Up	0.0021359	K	Endoplasmin OS=Homo sapiens OX=9606 GN=HSP90B1 PE=1 SV=1	HSP90B1	1	0.0291692	80.438	TLDMIK(1)K	3	-0.98878	2	0.833	0.741	0.715	1.239	1.084	1.181
Cellular Component	GO:0070161	3	anchoring junction	0.00863695	P15291	348	1.811	Up	0.0005237	K	Beta-1,4-galactosyltransferase 1 OS=Homo sapiens OX=9606 GN=B4GALT1 PE=1 SV=5	B4GALT1	1	0.0295481	72.23	K(1)NEPNPQR	2	0.42742	1	0.751	0.632	0.648	1.279	1.22	1.18
Cellular Component	GO:0070161	3	anchoring junction	0.00863695	P31946	70	1.526	Up	0.0008628	K	14-3-3 protein beta/alpha OS=Homo sapiens OX=9606 GN=YWHAB PE=1 SV=3	YWHAB	1	1.60397e-05	106.67	VISSIEQK(1)TER	3	-0.051644	2	0.777	0.814	0.701	1.201	1.131	1.165
Cellular Component	GO:0070161	3	anchoring junction	0.00863695	P23284	215	2.768	Up	5.7981e-05	K	Peptidyl-prolyl cis-trans isomerase B OS=Homo sapiens OX=9606 GN=PPIB PE=1 SV=2	PPIB	0.999974	0.00810599	71.531	IEVEKPFAIAK(1)E	2	0.05953	1	0.53	0.45	0.485	1.419	1.275	1.361
Cellular Component	GO:0070161	3	anchoring junction	0.00863695	P23284	186	1.623	Up	0.00046209	K	Peptidyl-prolyl cis-trans isomerase B OS=Homo sapiens OX=9606 GN=PPIB PE=1 SV=2	PPIB	1	0.00214624	76.326	VESTK(1)TDSR	2	1.0719	2	0.776	0.75	0.668	1.175	1.209	1.177
Cellular Component	GO:0070161	3	anchoring junction	0.00863695	P23284	129	1.737	Up	2.1985e-06	K	Peptidyl-prolyl cis-trans isomerase B OS=Homo sapiens OX=9606 GN=PPIB PE=1 SV=2	PPIB	1	0.0113626	70.942	FPDENFK(1)LK	3	-0.38822	2	0.71	0.703	0.677	1.218	1.193	1.22
Cellular Component	GO:0070161	3	anchoring junction	0.00863695	P13987	90	2.086	Up	2.1035e-06	K	CD59 glycoprotein OS=Homo sapiens OX=9606 GN=CD59 PE=1 SV=1	CD59	1	3.9152e-08	141.13	ENELTYYCCK(1)K	2	-0.33008	2	0.61	0.612	0.605	1.303	1.29	1.218
Cellular Component	GO:0070161	3	anchoring junction	0.00863695	P13987	66	1.753	Up	0.00061964	K	CD59 glycoprotein OS=Homo sapiens OX=9606 GN=CD59 PE=1 SV=1	CD59	1	4.46545e-17	135.72	CWK(1)FEHCNFNDVTTR	3	-2.6005	1	0.661	0.66	0.756	1.253	1.26	1.128
Cellular Component	GO:0070161	3	anchoring junction	0.00863695	P39023	66	1.637	Up	1.8678e-05	K	60S ribosomal protein L3 OS=Homo sapiens OX=9606 GN=RPL3 PE=1 SV=2	RPL3	1	0.0020035	71.153	EVDRPGSK(1)VNK	3	-0.11062	1	0.705	0.753	0.721	1.174	1.195	1.199
Cellular Component	GO:0070161	3	anchoring junction	0.00863695	P39023	115	1.601	Up	0.00150122	K	60S ribosomal protein L3 OS=Homo sapiens OX=9606 GN=RPL3 PE=1 SV=2	RPL3	1	0.000290809	84.734	TVFAEHISDECK(1)R	3	-0.2477	1	0.682	0.738	0.796	1.244	1.216	1.088
Cellular Component	GO:0070161	3	anchoring junction	0.00863695	P62249	26	1.879	Up	0.0027232	K	40S ribosomal protein S16 OS=Homo sapiens OX=9606 GN=RPS16 PE=1 SV=2	RPS16	1	0.0195879	51.762	TATAVAHCK(1)R	3	-0.38563	1	0.581	0.604	0.786	1.233	1.194	1.277
Cellular Component	GO:0070161	3	anchoring junction	0.00863695	P62277	34	1.54	Up	5.7354e-05	K	40S ribosomal protein S13 OS=Homo sapiens OX=9606 GN=RPS13 PE=1 SV=2	RPS13	1	4.38739e-08	131.35	LTSDDVK(1)EQIYK	2	0.23715	1	0.761	0.744	0.773	1.215	1.163	1.13
Cellular Component	GO:0070161	3	anchoring junction	0.00863695	P62269	137	1.73	Up	2.4191e-06	K	40S ribosomal protein S18 OS=Homo sapiens OX=9606 GN=RPS18 PE=1 SV=3	RPS18	1	0.00404982	83.438	GQHTK(1)TTGR	2	0.13381	2	0.682	0.709	0.705	1.22	1.182	1.224
Cellular Component	GO:0070161	3	anchoring junction	0.00863695	P35221	881	1.511	Up	0.00040268	K	Catenin alpha-1 OS=Homo sapiens OX=9606 GN=CTNNA1 PE=1 SV=1	CTNNA1	1	0.00164808	73.927	EKQDETQTK(1)IK	3	0.98541	1	0.774	0.811	0.723	1.193	1.172	1.122
Cellular Component	GO:0070161	3	anchoring junction	0.00863695	P11021	553	1.584	Up	0.00051646	K	Endoplasmic reticulum chaperone BiP OS=Homo sapiens OX=9606 GN=HSPA5 PE=1 SV=2	HSPA5	1	0.0198462	68.915	FAEEDK(1)K	3	0.25072	1	0.739	0.758	0.737	1.273	1.094	1.171
Cellular Component	GO:0070161	3	anchoring junction	0.00863695	P11021	352	1.593	Up	7.6558e-05	K	Endoplasmic reticulum chaperone BiP OS=Homo sapiens OX=9606 GN=HSPA5 PE=1 SV=2	HSPA5	1	0.000769989	104.22	VLEDSDLK(1)K	3	2.7364	2	0.731	0.73	0.76	1.123	1.214	1.2
Cellular Component	GO:0002080	12	acrosomal membrane	0.0401935	Q15643	819	1.941	Up	0.000179346	K	Thyroid receptor-interacting protein 11 OS=Homo sapiens OX=9606 GN=TRIP11 PE=1 SV=3	TRIP11	1	0.025517	51.346	EIFIEK(1)LK	3	0.83552	1	0.602	0.698	0.625	1.244	1.199	1.294
Cellular Component	GO:0002080	12	acrosomal membrane	0.0401935	Q03135	57	1.523	Up	0.0012176	K	Caveolin-1 OS=Homo sapiens OX=9606 GN=CAV1 PE=1 SV=4	CAV1	1	0.00201216	67.997	DPK(1)HLNDDVVK	3	1.0261	1	0.694	0.781	0.816	1.145	1.139	1.206
Cellular Component	GO:0005790	9	smooth endoplasmic reticulum	0.0160199	P27824	87	1.514	Up	0.00095527	K	Calnexin OS=Homo sapiens OX=9606 GN=CANX PE=1 SV=2	CANX	1	0.014782	46.88	GTLSGWILSK(1)AK	3	-0.67335	1	0.807	0.786	0.712	1.226	1.112	1.152
Cellular Component	GO:0005790	9	smooth endoplasmic reticulum	0.0160199	P23284	215	2.768	Up	5.7981e-05	K	Peptidyl-prolyl cis-trans isomerase B OS=Homo sapiens OX=9606 GN=PPIB PE=1 SV=2	PPIB	0.999974	0.00810599	71.531	IEVEKPFAIAK(1)E	2	0.05953	1	0.53	0.45	0.485	1.419	1.275	1.361
Cellular Component	GO:0005790	9	smooth endoplasmic reticulum	0.0160199	P23284	186	1.623	Up	0.00046209	K	Peptidyl-prolyl cis-trans isomerase B OS=Homo sapiens OX=9606 GN=PPIB PE=1 SV=2	PPIB	1	0.00214624	76.326	VESTK(1)TDSR	2	1.0719	2	0.776	0.75	0.668	1.175	1.209	1.177
Cellular Component	GO:0005790	9	smooth endoplasmic reticulum	0.0160199	P23284	129	1.737	Up	2.1985e-06	K	Peptidyl-prolyl cis-trans isomerase B OS=Homo sapiens OX=9606 GN=PPIB PE=1 SV=2	PPIB	1	0.0113626	70.942	FPDENFK(1)LK	3	-0.38822	2	0.71	0.703	0.677	1.218	1.193	1.22
Cellular Component	GO:0005790	9	smooth endoplasmic reticulum	0.0160199	Q9Y4L1	991	1.814	Up	0.00105528	K	Hypoxia up-regulated protein 1 OS=Homo sapiens OX=9606 GN=HYOU1 PE=1 SV=1	HYOU1	1	0.0356549	68.657	EQSTGQK(1)R	2	-0.21595	1	0.705	0.586	0.734	1.194	1.25	1.23
Cellular Component	GO:0005790	9	smooth endoplasmic reticulum	0.0160199	Q9Y4L1	537	1.679	Up	0.00189553	K	Hypoxia up-regulated protein 1 OS=Homo sapiens OX=9606 GN=HYOU1 PE=1 SV=1	HYOU1	1	2.35366e-05	105.65	KYPDYESK(1)GIK	3	1.7955	1	0.728	0.644	0.773	1.297	1.201	1.103
Cellular Component	GO:0005790	9	smooth endoplasmic reticulum	0.0160199	P11021	553	1.584	Up	0.00051646	K	Endoplasmic reticulum chaperone BiP OS=Homo sapiens OX=9606 GN=HSPA5 PE=1 SV=2	HSPA5	1	0.0198462	68.915	FAEEDK(1)K	3	0.25072	1	0.739	0.758	0.737	1.273	1.094	1.171
Cellular Component	GO:0005790	9	smooth endoplasmic reticulum	0.0160199	P11021	352	1.593	Up	7.6558e-05	K	Endoplasmic reticulum chaperone BiP OS=Homo sapiens OX=9606 GN=HSPA5 PE=1 SV=2	HSPA5	1	0.000769989	104.22	VLEDSDLK(1)K	3	2.7364	2	0.731	0.73	0.76	1.123	1.214	1.2
Cellular Component	GO:0016324	8	apical plasma membrane	0.0842019	P08195	266	1.608	Up	0.00037925	K	4F2 cell-surface antigen heavy chain OS=Homo sapiens OX=9606 GN=SLC3A2 PE=1 SV=3	SLC3A2	1	3.45387e-05	99.788	GLVLGPIHK(1)NQK	3	-0.25361	1	0.772	0.719	0.718	1.155	1.268	1.129
Cellular Component	GO:0016324	8	apical plasma membrane	0.0842019	Q9UPX8	1174	1.904	Up	0.00047943	K	SH3 and multiple ankyrin repeat domains protein 2 OS=Homo sapiens OX=9606 GN=SHANK2 PE=1 SV=3	SHANK2	1	0.0255254	57.281	MK(1)PIIHK	3	-3.76	1	0.718	0.65	0.589	1.296	1.239	1.192
Cellular Component	GO:0016324	8	apical plasma membrane	0.0842019	P18065	207	5.699	Up	4.9835e-07	K	Insulin-like growth factor-binding protein 2 OS=Homo sapiens OX=9606 GN=IGFBP2 PE=1 SV=2	IGFBP2	1	0.00370776	54.343	GGK(1)HHLGLEEPK	4	0.020273	1	0.27	0.255	0.265	1.49	1.426	1.586
Cellular Component	GO:0016324	8	apical plasma membrane	0.0842019	P18065	216	5.711	Up	2.5698e-06	K	Insulin-like growth factor-binding protein 2 OS=Homo sapiens OX=9606 GN=IGFBP2 PE=1 SV=2	IGFBP2	1	0.000564305	85.676	HHLGLEEPK(1)K	4	-0.036363	1	0.289	0.25	0.25	1.503	1.444	1.559
Cellular Component	GO:0016324	8	apical plasma membrane	0.0842019	P16422	106	1.604	Up	9.7064e-05	K	Epithelial cell adhesion molecule OS=Homo sapiens OX=9606 GN=EPCAM PE=1 SV=2	EPCAM	1	1.06393e-16	97.771	AKPEGALQNNDGLYDPDCDESGLFK(1)AK	4	-0.73346	3	0.778	0.711	0.724	1.211	1.164	1.175
Cellular Component	GO:0016324	8	apical plasma membrane	0.0842019	P16422	160	10.663	Up	1.6533e-07	K	Epithelial cell adhesion molecule OS=Homo sapiens OX=9606 GN=EPCAM PE=1 SV=2	EPCAM	1	0.000107872	110.08	EKPYDSK(1)SLR	2	-0.057166	2	0.152	0.147	0.146	1.691	1.532	1.522
Cellular Component	GO:0016324	8	apical plasma membrane	0.0842019	Q03135	57	1.523	Up	0.0012176	K	Caveolin-1 OS=Homo sapiens OX=9606 GN=CAV1 PE=1 SV=4	CAV1	1	0.00201216	67.997	DPK(1)HLNDDVVK	3	1.0261	1	0.694	0.781	0.816	1.145	1.139	1.206
Cellular Component	GO:0016324	8	apical plasma membrane	0.0842019	P04920	893	4.44	Up	4.2628e-05	K	Anion exchange protein 2 OS=Homo sapiens OX=9606 GN=SLC4A2 PE=1 SV=4	SLC4A2	1	2.23352e-06	112.42	SLAGQSGQGK(1)PR	2	-2.3535	1	0.287	0.375	0.323	1.476	1.415	1.482
Cellular Component	GO:0071004	12	U2-type prespliceosome	0.0615606	Q15428	10	1.614	Up	0.0156602	K	Splicing factor 3A subunit 2 OS=Homo sapiens OX=9606 GN=SF3A2 PE=1 SV=2	SF3A2	1	1.3659e-26	154.07	PGGK(1)TGSGGVASSSESNR	2	0.58071	2	0.71	0.876	0.616	1.25	1.04	1.265
Cellular Component	GO:0071004	12	U2-type prespliceosome	0.0615606	P26368	462	1.533	Up	0.00065807	K	Splicing factor U2AF 65 kDa subunit OS=Homo sapiens OX=9606 GN=U2AF2 PE=1 SV=4	U2AF2	1	0.000151529	86.944	VVVTK(1)YCDPDSYHR	3	-0.73037	2	0.702	0.77	0.809	1.15	1.143	1.203
Cellular Component	GO:0071004	12	U2-type prespliceosome	0.0615606	Q15459	754	1.678	Up	0.0092791	K	Splicing factor 3A subunit 1 OS=Homo sapiens OX=9606 GN=SF3A1 PE=1 SV=1	SF3A1	1	0.000115335	90.614	IHEATGMPAGK(1)QK	3	1.5095	1	0.66	0.661	0.823	1.204	1.365	1.029
Cellular Component	GO:0005788	10	endoplasmic reticulum lumen	0.00386644	P53634	162	3.108	Up	0.00042277	K	Dipeptidyl peptidase 1 OS=Homo sapiens OX=9606 GN=CTSC PE=1 SV=2	CTSC	1	0.0014128	98.156	NSQEK(1)YSNR	2	-0.30772	1	0.369	0.439	0.525	1.453	1.385	1.305
Cellular Component	GO:0005788	10	endoplasmic reticulum lumen	0.00386644	Q12797	336	1.771	Up	0.0099388	K	Aspartyl/asparaginyl beta-hydroxylase OS=Homo sapiens OX=9606 GN=ASPH PE=1 SV=3	ASPH	1	0.0197409	87.476	LLNK(1)FDK	2	2.2137	1	0.759	0.622	0.682	1.221	1.227	1.206
Cellular Component	GO:0005788	10	endoplasmic reticulum lumen	0.00386644	P14625	467	2.375	Up	0.00132479	K	Endoplasmin OS=Homo sapiens OX=9606 GN=HSP90B1 PE=1 SV=1	HSP90B1	1	0.0260932	82.287	K(1)TLDMIK	2	-1.9897	1	0.517	0.571	0.564	1.316	1.312	1.296
Cellular Component	GO:0005788	10	endoplasmic reticulum lumen	0.00386644	P14625	473	1.531	Up	0.0021359	K	Endoplasmin OS=Homo sapiens OX=9606 GN=HSP90B1 PE=1 SV=1	HSP90B1	1	0.0291692	80.438	TLDMIK(1)K	3	-0.98878	2	0.833	0.741	0.715	1.239	1.084	1.181
Cellular Component	GO:0005788	10	endoplasmic reticulum lumen	0.00386644	P00740	446	2.291	Up	0.0032782	K	Coagulation factor IX OS=Homo sapiens OX=9606 GN=F9 PE=1 SV=2	F9	1	0.00440376	82.008	YGIYTK(1)VSR	2	-0.90947	1	0.619	0.527	0.554	1.289	1.3	1.305
Cellular Component	GO:0005788	10	endoplasmic reticulum lumen	0.00386644	Q15084	368	1.539	Up	1.70414e-05	K	Protein disulfide-isomerase A6 OS=Homo sapiens OX=9606 GN=PDIA6 PE=1 SV=1	PDIA6	1	0.0107878	97.798	MK(1)FALLK	2	-0.72228	1	0.752	0.78	0.746	1.188	1.148	1.169
Cellular Component	GO:0005788	10	endoplasmic reticulum lumen	0.00386644	P23284	215	2.768	Up	5.7981e-05	K	Peptidyl-prolyl cis-trans isomerase B OS=Homo sapiens OX=9606 GN=PPIB PE=1 SV=2	PPIB	0.999974	0.00810599	71.531	IEVEKPFAIAK(1)E	2	0.05953	1	0.53	0.45	0.485	1.419	1.275	1.361
Cellular Component	GO:0005788	10	endoplasmic reticulum lumen	0.00386644	P23284	186	1.623	Up	0.00046209	K	Peptidyl-prolyl cis-trans isomerase B OS=Homo sapiens OX=9606 GN=PPIB PE=1 SV=2	PPIB	1	0.00214624	76.326	VESTK(1)TDSR	2	1.0719	2	0.776	0.75	0.668	1.175	1.209	1.177
Cellular Component	GO:0005788	10	endoplasmic reticulum lumen	0.00386644	P23284	129	1.737	Up	2.1985e-06	K	Peptidyl-prolyl cis-trans isomerase B OS=Homo sapiens OX=9606 GN=PPIB PE=1 SV=2	PPIB	1	0.0113626	70.942	FPDENFK(1)LK	3	-0.38822	2	0.71	0.703	0.677	1.218	1.193	1.22
Cellular Component	GO:0005788	10	endoplasmic reticulum lumen	0.00386644	P27824	87	1.514	Up	0.00095527	K	Calnexin OS=Homo sapiens OX=9606 GN=CANX PE=1 SV=2	CANX	1	0.014782	46.88	GTLSGWILSK(1)AK	3	-0.67335	1	0.807	0.786	0.712	1.226	1.112	1.152
Cellular Component	GO:0005788	10	endoplasmic reticulum lumen	0.00386644	P30101	494	1.633	Up	0.00061616	K	Protein disulfide-isomerase A3 OS=Homo sapiens OX=9606 GN=PDIA3 PE=1 SV=4	PDIA3	1	1.11552e-22	158.91	EATNPPVIQEEK(1)PK	2	-0.21724	3	0.713	0.703	0.767	1.119	1.287	1.158
Cellular Component	GO:0005788	10	endoplasmic reticulum lumen	0.00386644	P11021	553	1.584	Up	0.00051646	K	Endoplasmic reticulum chaperone BiP OS=Homo sapiens OX=9606 GN=HSPA5 PE=1 SV=2	HSPA5	1	0.0198462	68.915	FAEEDK(1)K	3	0.25072	1	0.739	0.758	0.737	1.273	1.094	1.171
Cellular Component	GO:0005788	10	endoplasmic reticulum lumen	0.00386644	P11021	352	1.593	Up	7.6558e-05	K	Endoplasmic reticulum chaperone BiP OS=Homo sapiens OX=9606 GN=HSPA5 PE=1 SV=2	HSPA5	1	0.000769989	104.22	VLEDSDLK(1)K	3	2.7364	2	0.731	0.73	0.76	1.123	1.214	1.2
Cellular Component	GO:0005788	10	endoplasmic reticulum lumen	0.00386644	P02458	1444	3.469	Up	1.93387e-05	K	Collagen alpha-1(II) chain OS=Homo sapiens OX=9606 GN=COL2A1 PE=1 SV=3	COL2A1	1	0.014601	68.915	HTGK(1)WGK	3	-0.79413	1	0.434	0.395	0.388	1.483	1.302	1.437
Cellular Component	GO:0005788	10	endoplasmic reticulum lumen	0.00386644	Q9Y4L1	991	1.814	Up	0.00105528	K	Hypoxia up-regulated protein 1 OS=Homo sapiens OX=9606 GN=HYOU1 PE=1 SV=1	HYOU1	1	0.0356549	68.657	EQSTGQK(1)R	2	-0.21595	1	0.705	0.586	0.734	1.194	1.25	1.23
Cellular Component	GO:0005788	10	endoplasmic reticulum lumen	0.00386644	Q9Y4L1	537	1.679	Up	0.00189553	K	Hypoxia up-regulated protein 1 OS=Homo sapiens OX=9606 GN=HYOU1 PE=1 SV=1	HYOU1	1	2.35366e-05	105.65	KYPDYESK(1)GIK	3	1.7955	1	0.728	0.644	0.773	1.297	1.201	1.103
Cellular Component	GO:0031597	10	cytosolic proteasome complex	0.298292	P62333	206	2.136	Up	0.00048094	K	26S proteasome regulatory subunit 10B OS=Homo sapiens OX=9606 GN=PSMC6 PE=1 SV=1	PSMC6	1	0.000150997	83.37	VVSSSIVDK(1)YIGESAR	3	-0.50553	1	0.626	0.649	0.518	1.227	1.325	1.278
Cellular Component	GO:0031597	10	cytosolic proteasome complex	0.298292	P62333	322	1.784	Up	0.040963	K	26S proteasome regulatory subunit 10B OS=Homo sapiens OX=9606 GN=PSMC6 PE=1 SV=1	PSMC6	1	3.68076e-07	92.39	IHAGPITK(1)HGEIDYEAIVK	4	0.89264	1	0.667	0.664	0.727	1.374	1.471	0.826
Cellular Component	GO:0031597	10	cytosolic proteasome complex	0.298292	P62195	330	2.306	Up	0.0105445	K	26S proteasome regulatory subunit 8 OS=Homo sapiens OX=9606 GN=PSMC5 PE=1 SV=1	PSMC5	1	0.006593	64.82	LDILK(1)IHSR	3	-0.7783	1	0.602	0.591	0.492	0.932	1.66	1.293
Cellular Component	GO:0031093	12	platelet alpha granule lumen	0.00981975	P15692	149	1.52	Up	0.0183197	K	Vascular endothelial growth factor A OS=Homo sapiens OX=9606 GN=VEGFA PE=1 SV=2	VEGFA	1	0.0158118	68.016	GK(1)GK(1)GQK(1)R	3	0.20842	1	0.619	0.836	0.835	1.054	1.197	1.23
Cellular Component	GO:0031093	12	platelet alpha granule lumen	0.00981975	P15692	147	1.52	Up	0.0183197	K	Vascular endothelial growth factor A OS=Homo sapiens OX=9606 GN=VEGFA PE=1 SV=2	VEGFA	1	0.0158118	68.016	GK(1)GK(1)GQK(1)R	3	0.20842	1	0.619	0.836	0.835	1.054	1.197	1.23
Cellular Component	GO:0031093	12	platelet alpha granule lumen	0.00981975	P15692	152	1.52	Up	0.0183197	K	Vascular endothelial growth factor A OS=Homo sapiens OX=9606 GN=VEGFA PE=1 SV=2	VEGFA	1	0.0158118	68.016	GK(1)GK(1)GQK(1)R	3	0.20842	1	0.619	0.836	0.835	1.054	1.197	1.23
Cellular Component	GO:0031093	12	platelet alpha granule lumen	0.00981975	P04075	200	1.909	Up	0.00039957	K	Fructose-bisphosphate aldolase A OS=Homo sapiens OX=9606 GN=ALDOA PE=1 SV=2	ALDOA	1	1.06057e-28	125	YASICQQNGIVPIVEPEILPDGDHDLK(1)R	3	-1.6772	8	0.693	0.577	0.681	1.214	1.249	1.262
Cellular Component	GO:0031093	12	platelet alpha granule lumen	0.00981975	P04075	108	1.531	Up	0.00098334	K	Fructose-bisphosphate aldolase A OS=Homo sapiens OX=9606 GN=ALDOA PE=1 SV=2	ALDOA	1	0.000445929	92.866	GGVVGIK(1)VDK	2	0.15856	1	0.727	0.722	0.837	1.193	1.157	1.149
Cellular Component	GO:0031093	12	platelet alpha granule lumen	0.00981975	P02765	225	2.633	Up	1.9636e-06	K	Alpha-2-HS-glycoprotein OS=Homo sapiens OX=9606 GN=AHSG PE=1 SV=2	AHSG	1	1.71027e-17	156.24	CNLLAEK(1)QYGFCK	3	-0.271	5	0.509	0.493	0.523	1.376	1.357	1.282
Cellular Component	GO:0031093	12	platelet alpha granule lumen	0.00981975	O43707	779	1.506	Up	4.621e-06	K	Alpha-actinin-4 OS=Homo sapiens OX=9606 GN=ACTN4 PE=1 SV=2	ACTN4	1	2.1119e-07	92.098	ASFNHFDK(1)DHGGALGPEEFK	4	-0.48137	1	0.769	0.755	0.788	1.156	1.148	1.177
Cellular Component	GO:0015935	10	small ribosomal subunit	0.166715	P62753	243	1.631	Up	0.000121433	K	40S ribosomal protein S6 OS=Homo sapiens OX=9606 GN=RPS6 PE=1 SV=1	RPS6	1	1.94239e-06	121.29	ASTSK(1)SESSQK	2	0.72863	2	0.736	0.685	0.766	1.194	1.197	1.175
Cellular Component	GO:0015935	10	small ribosomal subunit	0.166715	Q9Y2R5	78	1.614	Up	0.0103974	K	28S ribosomal protein S17, mitochondrial OS=Homo sapiens OX=9606 GN=MRPS17 PE=1 SV=1	MRPS17	1	0.0111073	46.88	HVK(1)HELAEIVFK	4	-0.81694	1	0.698	0.883	0.619	1.135	1.24	1.176
Cellular Component	GO:0015935	10	small ribosomal subunit	0.166715	P62249	26	1.879	Up	0.0027232	K	40S ribosomal protein S16 OS=Homo sapiens OX=9606 GN=RPS16 PE=1 SV=2	RPS16	1	0.0195879	51.762	TATAVAHCK(1)R	3	-0.38563	1	0.581	0.604	0.786	1.233	1.194	1.277
Cellular Component	GO:0015935	10	small ribosomal subunit	0.166715	P62277	34	1.54	Up	5.7354e-05	K	40S ribosomal protein S13 OS=Homo sapiens OX=9606 GN=RPS13 PE=1 SV=2	RPS13	1	4.38739e-08	131.35	LTSDDVK(1)EQIYK	2	0.23715	1	0.761	0.744	0.773	1.215	1.163	1.13
Cellular Component	GO:0015935	10	small ribosomal subunit	0.166715	P62269	137	1.73	Up	2.4191e-06	K	40S ribosomal protein S18 OS=Homo sapiens OX=9606 GN=RPS18 PE=1 SV=3	RPS18	1	0.00404982	83.438	GQHTK(1)TTGR	2	0.13381	2	0.682	0.709	0.705	1.22	1.182	1.224
Cellular Component	GO:0015935	10	small ribosomal subunit	0.166715	P15880	275	3.946	Up	0.020878	K	40S ribosomal protein S2 OS=Homo sapiens OX=9606 GN=RPS2 PE=1 SV=2	RPS2	1	0.00013314	66.289	SPYQEFTDHLVK(1)THTR	4	-0.31731	1		0.19	0.445	1.296	1.113	1.35
Cellular Component	GO:0015935	10	small ribosomal subunit	0.166715	P62263	106	4.268	Up	8.5519e-07	K	40S ribosomal protein S14 OS=Homo sapiens OX=9606 GN=RPS14 PE=1 SV=3	RPS14	1	0.000851749	84.173	TK(1)TPGPGAQSALR	2	-2.5539	1	0.322	0.351	0.346	1.465	1.393	1.491
Cellular Component	GO:0015935	10	small ribosomal subunit	0.166715	P62263	96	1.537	Up	0.0272	K	40S ribosomal protein S14 OS=Homo sapiens OX=9606 GN=RPS14 PE=1 SV=3	RPS14	1	7.38528e-07	110.08	ELGITALHIK(1)LR	3	0.52572	2	0.692	0.795	0.788	0.974	1.432	1.09
Cellular Component	GO:0031305	15	integral component of mitochondrial inner membrane	0.0615606	Q9NX63	173	1.607	Up	2.6912e-07	K	MICOS complex subunit MIC19 OS=Homo sapiens OX=9606 GN=CHCHD3 PE=1 SV=1	CHCHD3	1	0.000353452	107.06	AAEEVEAK(1)FK	3	0.05199	2	0.732	0.744	0.733	1.173	1.179	1.198
Cellular Component	GO:0031305	15	integral component of mitochondrial inner membrane	0.0615606	Q9NX63	45	7.858	Up	1.602e-05	K	MICOS complex subunit MIC19 OS=Homo sapiens OX=9606 GN=CHCHD3 PE=1 SV=1	CHCHD3	1	3.73343e-07	132.5	ESSPSGSK(1)SQR	2	0.84753	1	0.18	0.184	0.227	1.612	1.552	1.48
Cellular Component	GO:0031305	15	integral component of mitochondrial inner membrane	0.0615606	Q16891	102	2.142	Up	0.000164333	K	MICOS complex subunit MIC60 OS=Homo sapiens OX=9606 GN=IMMT PE=1 SV=1	IMMT	1	0.00406596	74.841	K(1)SIQSGPLK	3	0.37176	2	0.589	0.646	0.554	1.229	1.365	1.238
Cellular Component	GO:0031305	15	integral component of mitochondrial inner membrane	0.0615606	Q9BRQ6	114	2.999	Up	0.00020123	K	MICOS complex subunit MIC25 OS=Homo sapiens OX=9606 GN=CHCHD6 PE=1 SV=1	CHCHD6	1	0.00655234	74.301	EAATK(1)HSK	3	1.3693	1	0.495	0.401	0.479	1.488	1.397	1.239
Cellular Component	GO:0000792	11	heterochromatin	0.243116	P45973	91	1.882	Up	0.000176434	K	Chromobox protein homolog 5 OS=Homo sapiens OX=9606 GN=CBX5 PE=1 SV=1	CBX5	1	6.4636e-18	162.37	K(1)SNFSNSADDIK	2	-0.43997	1	0.616	0.7	0.656	1.302	1.23	1.179
Cellular Component	GO:0000792	11	heterochromatin	0.243116	P10412	63	1.615	Up	2.6726e-09	K	Histone H1.4 OS=Homo sapiens OX=9606 GN=H1-4 PE=1 SV=2	H1-4	1	0.000637306	85.355	SGVSLAALK(1)K	3	0.16261	1	0.734	0.735	0.733	1.191	1.181	1.184
Cellular Component	GO:0000792	11	heterochromatin	0.243116	P0C0S5	8	2.197	Up	4.9094e-07	K	Histone H2A.Z OS=Homo sapiens OX=9606 GN=H2AZ1 PE=1 SV=2	H2AZ1	1	2.41356e-07	111.64	AGK(1)DSGK(1)AK(1)TK	2	0.79948	12	0.591	0.582	0.583	1.323	1.257	1.278
Cellular Component	GO:0000792	11	heterochromatin	0.243116	P0C0S5	12	2.225	Up	3.9617e-07	K	Histone H2A.Z OS=Homo sapiens OX=9606 GN=H2AZ1 PE=1 SV=2	H2AZ1	1	2.41356e-07	111.64	AGK(1)DSGK(1)AK(1)TK	2	0.79948	10	0.585	0.579	0.575	1.326	1.264	1.279
Cellular Component	GO:0000792	11	heterochromatin	0.243116	P0C0S5	5	1.669	Up	5.8561e-05	K	Histone H2A.Z OS=Homo sapiens OX=9606 GN=H2AZ1 PE=1 SV=2	H2AZ1	1	2.41356e-07	111.64	AGGK(1)AGK(1)DSGK(1)AK(1)TK	2	0.11281	10	0.749	0.714	0.689	1.227	1.164	1.201
Cellular Component	GO:0000792	11	heterochromatin	0.243116	P0C0S5	14	2.729	Up	2.1717e-06	K	Histone H2A.Z OS=Homo sapiens OX=9606 GN=H2AZ1 PE=1 SV=2	H2AZ1	1	2.41356e-07	106.57	AGK(1)DSGK(1)AK(1)TK	2	0.79948	4	0.511	0.491	0.48	1.402	1.295	1.348
Cellular Component	GO:0000792	11	heterochromatin	0.243116	Q96T88	546	1.987	Up	0.0040585	K	E3 ubiquitin-protein ligase UHRF1 OS=Homo sapiens OX=9606 GN=UHRF1 PE=1 SV=1	UHRF1	1	0.000183326	96.059	NSK(1)YAPAEGNR	2	0.1761	1	0.675	0.581	0.638	1.244	1.265	1.255
Cellular Component	GO:0034702	7	ion channel complex	0.0615606	Q9Y696	146	1.747	Up	0.000158095	K	Chloride intracellular channel protein 4 OS=Homo sapiens OX=9606 GN=CLIC4 PE=1 SV=4	CLIC4	1	0.00711757	91.867	GLLK(1)TLQK	2	0.55617	1	0.693	0.685	0.705	1.273	1.121	1.245
Cellular Component	GO:0034702	7	ion channel complex	0.0615606	Q12797	336	1.771	Up	0.0099388	K	Aspartyl/asparaginyl beta-hydroxylase OS=Homo sapiens OX=9606 GN=ASPH PE=1 SV=3	ASPH	1	0.0197409	87.476	LLNK(1)FDK	2	2.2137	1	0.759	0.622	0.682	1.221	1.227	1.206
Cellular Component	GO:0034702	7	ion channel complex	0.0615606	Q14247	161	1.788	Up	3.79e-05	K	Src substrate cortactin OS=Homo sapiens OX=9606 GN=CTTN PE=1 SV=2	CTTN	1	5.64477e-17	133.78	DYSSGFGGK(1)YGVQADR	2	0.1629	2	0.677	0.659	0.712	1.252	1.23	1.179
Cellular Component	GO:0034702	7	ion channel complex	0.0615606	Q14247	198	1.588	Up	0.00024373	K	Src substrate cortactin OS=Homo sapiens OX=9606 GN=CTTN PE=1 SV=2	CTTN	1	6.55628e-07	113.24	GFGGK(1)YGIDK	3	-0.15514	2	0.734	0.77	0.724	1.251	1.119	1.169
Cellular Component	GO:0005720	14	nuclear heterochromatin	0.0345128	P45973	91	1.882	Up	0.000176434	K	Chromobox protein homolog 5 OS=Homo sapiens OX=9606 GN=CBX5 PE=1 SV=1	CBX5	1	6.4636e-18	162.37	K(1)SNFSNSADDIK	2	-0.43997	1	0.616	0.7	0.656	1.302	1.23	1.179
Cellular Component	GO:0005720	14	nuclear heterochromatin	0.0345128	P10412	63	1.615	Up	2.6726e-09	K	Histone H1.4 OS=Homo sapiens OX=9606 GN=H1-4 PE=1 SV=2	H1-4	1	0.000637306	85.355	SGVSLAALK(1)K	3	0.16261	1	0.734	0.735	0.733	1.191	1.181	1.184
Cellular Component	GO:0005720	14	nuclear heterochromatin	0.0345128	P0C0S5	8	2.197	Up	4.9094e-07	K	Histone H2A.Z OS=Homo sapiens OX=9606 GN=H2AZ1 PE=1 SV=2	H2AZ1	1	2.41356e-07	111.64	AGK(1)DSGK(1)AK(1)TK	2	0.79948	12	0.591	0.582	0.583	1.323	1.257	1.278
Cellular Component	GO:0005720	14	nuclear heterochromatin	0.0345128	P0C0S5	12	2.225	Up	3.9617e-07	K	Histone H2A.Z OS=Homo sapiens OX=9606 GN=H2AZ1 PE=1 SV=2	H2AZ1	1	2.41356e-07	111.64	AGK(1)DSGK(1)AK(1)TK	2	0.79948	10	0.585	0.579	0.575	1.326	1.264	1.279
Cellular Component	GO:0005720	14	nuclear heterochromatin	0.0345128	P0C0S5	5	1.669	Up	5.8561e-05	K	Histone H2A.Z OS=Homo sapiens OX=9606 GN=H2AZ1 PE=1 SV=2	H2AZ1	1	2.41356e-07	111.64	AGGK(1)AGK(1)DSGK(1)AK(1)TK	2	0.11281	10	0.749	0.714	0.689	1.227	1.164	1.201
Cellular Component	GO:0005720	14	nuclear heterochromatin	0.0345128	P0C0S5	14	2.729	Up	2.1717e-06	K	Histone H2A.Z OS=Homo sapiens OX=9606 GN=H2AZ1 PE=1 SV=2	H2AZ1	1	2.41356e-07	106.57	AGK(1)DSGK(1)AK(1)TK	2	0.79948	4	0.511	0.491	0.48	1.402	1.295	1.348
Cellular Component	GO:0005720	14	nuclear heterochromatin	0.0345128	Q96T88	546	1.987	Up	0.0040585	K	E3 ubiquitin-protein ligase UHRF1 OS=Homo sapiens OX=9606 GN=UHRF1 PE=1 SV=1	UHRF1	1	0.000183326	96.059	NSK(1)YAPAEGNR	2	0.1761	1	0.675	0.581	0.638	1.244	1.265	1.255
Cellular Component	GO:0042383	6	sarcolemma	0.303814	Q13557	268	2.448	Up	0.00064196	K	Calcium/calmodulin-dependent protein kinase type II subunit delta OS=Homo sapiens OX=9606 GN=CAMK2D PE=1 SV=3	CAMK2D	1	9.73432e-06	94.09	ITASEALK(1)HPWICQR	3	-2.1026	1	0.448	0.594	0.572	1.394	1.259	1.298
Cellular Component	GO:0042383	6	sarcolemma	0.303814	P24043	3092	1.918	Up	1.50302e-05	K	Laminin subunit alpha-2 OS=Homo sapiens OX=9606 GN=LAMA2 PE=1 SV=4	LAMA2	1	0.0350388	67.385	GCIRSLK(1)LTK	2	3.4243	1	0.661	0.626	0.658	1.283	1.221	1.227
Cellular Component	GO:0042383	6	sarcolemma	0.303814	P13987	90	2.086	Up	2.1035e-06	K	CD59 glycoprotein OS=Homo sapiens OX=9606 GN=CD59 PE=1 SV=1	CD59	1	3.9152e-08	141.13	ENELTYYCCK(1)K	2	-0.33008	2	0.61	0.612	0.605	1.303	1.29	1.218
Cellular Component	GO:0042383	6	sarcolemma	0.303814	P13987	66	1.753	Up	0.00061964	K	CD59 glycoprotein OS=Homo sapiens OX=9606 GN=CD59 PE=1 SV=1	CD59	1	4.46545e-17	135.72	CWK(1)FEHCNFNDVTTR	3	-2.6005	1	0.661	0.66	0.756	1.253	1.26	1.128
Cellular Component	GO:0009295	2	nucleoid	0.0837966	Q9NVI7	165	1.985	Up	0.0004845	K	ATPase family AAA domain-containing protein 3A OS=Homo sapiens OX=9606 GN=ATAD3A PE=1 SV=2	ATAD3A	1	0.00698013	92.538	K(1)TLSEETR	2	-0.5115	1	0.56	0.7	0.634	1.294	1.234	1.232
Cellular Component	GO:0009295	2	nucleoid	0.0837966	P34897	200	1.553	Up	0.0024569	K	Serine hydroxymethyltransferase, mitochondrial OS=Homo sapiens OX=9606 GN=SHMT2 PE=1 SV=3	SHMT2	1	1.11032e-09	113.54	LNPK(1)TGLIDYNQLALTAR	3	-0.53359	1	0.671	0.753	0.836	1.158	1.146	1.206
Cellular Component	GO:0009295	2	nucleoid	0.0837966	P36776	367	1.766	Up	1.2118e-06	K	Lon protease homolog, mitochondrial OS=Homo sapiens OX=9606 GN=LONP1 PE=1 SV=2	LONP1	1	0.0134532	94.114	ALSLLK(1)K	2	0.1015	1	0.679	0.702	0.684	1.21	1.197	1.239
Cellular Component	GO:0009295	2	nucleoid	0.0837966	P21796	61	1.877	Up	2.673e-06	K	Voltage-dependent anion-selective channel protein 1 OS=Homo sapiens OX=9606 GN=VDAC1 PE=1 SV=2	VDAC1	1	0.00011548	117.25	VTGSLETK(1)YR	3	1.0352	3	0.663	0.636	0.677	1.244	1.244	1.221
Cellular Component	GO:0009295	2	nucleoid	0.0837966	P21796	20	1.506	Up	6.0692e-05	K	Voltage-dependent anion-selective channel protein 1 OS=Homo sapiens OX=9606 GN=VDAC1 PE=1 SV=2	VDAC1	1	5.63016e-11	131.66	DVFTK(1)GYGFGLIK	2	0.76596	2	0.765	0.794	0.754	1.198	1.157	1.128
Cellular Component	GO:0009295	2	nucleoid	0.0837966	P42704	1357	1.508	Up	0.00045917	K	Leucine-rich PPR motif-containing protein, mitochondrial OS=Homo sapiens OX=9606 GN=LRPPRC PE=1 SV=3	LRPPRC	1	0.0295481	72.23	LDDLFLK(1)R	2	0.38254	1	0.752	0.803	0.752	1.115	1.129	1.235
Cellular Component	GO:0000932	10	P-body	0.135424	Q07065	301	1.726	Up	0.0034984	K	Cytoskeleton-associated protein 4 OS=Homo sapiens OX=9606 GN=CKAP4 PE=1 SV=2	CKAP4	1	0.00142164	100.92	EIQTSAK(1)SR	2	-1.0848	1	0.759	0.586	0.755	1.211	1.151	1.262
Cellular Component	GO:0000932	10	P-body	0.135424	Q9HAU5	655	2.502	Up	0.00068041	K	Regulator of nonsense transcripts 2 OS=Homo sapiens OX=9606 GN=UPF2 PE=1 SV=1	UPF2	1	0.0107852	75.819	K(1)DQINIETK	2	0.6534	1	0.517	0.515	0.554	1.314	1.325	1.329
Cellular Component	GO:0000932	10	P-body	0.135424	Q9BY77	110	1.805	Up	2.2605e-05	K	Polymerase delta-interacting protein 3 OS=Homo sapiens OX=9606 GN=POLDIP3 PE=1 SV=2	POLDIP3	1	0.0106975	71.524	QQTTVPQK(1)PR	2	1.5888	1	0.668	0.666	0.696	1.167	1.244	1.254
Cellular Component	GO:0000932	10	P-body	0.135424	Q15365	31	1.653	Up	0.0098571	K	Poly(rC)-binding protein 1 OS=Homo sapiens OX=9606 GN=PCBP1 PE=1 SV=2	PCBP1	1	0.00209659	91.658	EVGSIIGK(1)K	2	0.74548	2	0.745	0.741	0.679	1.055	1.447	1.076
Cellular Component	GO:0000932	10	P-body	0.135424	P11387	252	1.611	Up	0.0086001	K	DNA topoisomerase 1 OS=Homo sapiens OX=9606 GN=TOP1 PE=1 SV=2	TOP1	1	0.00441055	51.771	LSPK(1)AEEVATFFAK	3	-3.501	1	0.684	0.692	0.831	1.198	1.332	1.025
Cellular Component	GO:0000932	10	P-body	0.135424	P11387	218	1.572	Up	0.0049752	K	DNA topoisomerase 1 OS=Homo sapiens OX=9606 GN=TOP1 PE=1 SV=2	TOP1	1	0.00578621	85.212	WK(1)FLEHK	3	-0.5485	1	0.654	0.728	0.858	1.154	1.144	1.224
Cellular Component	GO:0044309	6	neuron spine	0.00201489	Q9UPX8	1174	1.904	Up	0.00047943	K	SH3 and multiple ankyrin repeat domains protein 2 OS=Homo sapiens OX=9606 GN=SHANK2 PE=1 SV=3	SHANK2	1	0.0255254	57.281	MK(1)PIIHK	3	-3.76	1	0.718	0.65	0.589	1.296	1.239	1.192
Cellular Component	GO:0044309	6	neuron spine	0.00201489	P27824	87	1.514	Up	0.00095527	K	Calnexin OS=Homo sapiens OX=9606 GN=CANX PE=1 SV=2	CANX	1	0.014782	46.88	GTLSGWILSK(1)AK	3	-0.67335	1	0.807	0.786	0.712	1.226	1.112	1.152
Cellular Component	GO:0044309	6	neuron spine	0.00201489	P35580	1782	1.618	Up	0.00133836	K	Myosin-10 OS=Homo sapiens OX=9606 GN=MYH10 PE=1 SV=3	MYH10	1	0.000848405	90.614	SAAQK(1)SDNAR	2	-0.18483	1	0.811	0.675	0.713	1.145	1.249	1.164
Cellular Component	GO:0044309	6	neuron spine	0.00201489	P23528	92	1.643	Up	3.7006e-05	K	Cofilin-1 OS=Homo sapiens OX=9606 GN=CFL1 PE=1 SV=3	CFL1	1	1.70741e-10	121.99	YALYDATYETK(1)ESK	2	0.88008	2	0.714	0.743	0.716	1.144	1.227	1.2
Cellular Component	GO:0044309	6	neuron spine	0.00201489	Q13009	564	2.554	Up	2.264e-05	K	T-lymphoma invasion and metastasis-inducing protein 1 OS=Homo sapiens OX=9606 GN=TIAM1 PE=1 SV=2	TIAM1	1	0.00536023	86.794	LLK(1)SEIK	3	-0.69534	1	0.501	0.52	0.54	1.387	1.234	1.366
Cellular Component	GO:0044309	6	neuron spine	0.00201489	Q7L576	1188	1.882	Up	5.6212e-05	K	Cytoplasmic FMR1-interacting protein 1 OS=Homo sapiens OX=9606 GN=CYFIP1 PE=1 SV=1	CYFIP1	0.999952	0.000231257	89.231	VQK(1)HDGKDEIIK	4	-1.3205	2	0.634	0.688	0.65	1.296	1.192	1.224
Cellular Component	GO:0044309	6	neuron spine	0.00201489	P24043	3092	1.918	Up	1.50302e-05	K	Laminin subunit alpha-2 OS=Homo sapiens OX=9606 GN=LAMA2 PE=1 SV=4	LAMA2	1	0.0350388	67.385	GCIRSLK(1)LTK	2	3.4243	1	0.661	0.626	0.658	1.283	1.221	1.227
Cellular Component	GO:0044309	6	neuron spine	0.00201489	Q14247	161	1.788	Up	3.79e-05	K	Src substrate cortactin OS=Homo sapiens OX=9606 GN=CTTN PE=1 SV=2	CTTN	1	5.64477e-17	133.78	DYSSGFGGK(1)YGVQADR	2	0.1629	2	0.677	0.659	0.712	1.252	1.23	1.179
Cellular Component	GO:0044309	6	neuron spine	0.00201489	Q14247	198	1.588	Up	0.00024373	K	Src substrate cortactin OS=Homo sapiens OX=9606 GN=CTTN PE=1 SV=2	CTTN	1	6.55628e-07	113.24	GFGGK(1)YGIDK	3	-0.15514	2	0.734	0.77	0.724	1.251	1.119	1.169
Cellular Component	GO:0098793	5	presynapse	0.155184	Q9NRD5	88	2.812	Up	3.5799e-06	K	PRKCA-binding protein OS=Homo sapiens OX=9606 GN=PICK1 PE=1 SV=2	PICK1	1	0.0229749	55.261	VEVAK(1)MIQEVK	2	0.85616	1	0.484	0.504	0.458	1.401	1.307	1.358
Cellular Component	GO:0098793	5	presynapse	0.155184	P17174	97	1.571	Up	0.0062823	K	Aspartate aminotransferase, cytoplasmic OS=Homo sapiens OX=9606 GN=GOT1 PE=1 SV=3	GOT1	1	0.000526115	69.03	LALGDDSPALK(1)EK	3	4.0464	1	0.768	0.717	0.76	1.092	1.374	1.06
Cellular Component	GO:0098793	5	presynapse	0.155184	P21796	61	1.877	Up	2.673e-06	K	Voltage-dependent anion-selective channel protein 1 OS=Homo sapiens OX=9606 GN=VDAC1 PE=1 SV=2	VDAC1	1	0.00011548	117.25	VTGSLETK(1)YR	3	1.0352	3	0.663	0.636	0.677	1.244	1.244	1.221
Cellular Component	GO:0098793	5	presynapse	0.155184	P21796	20	1.506	Up	6.0692e-05	K	Voltage-dependent anion-selective channel protein 1 OS=Homo sapiens OX=9606 GN=VDAC1 PE=1 SV=2	VDAC1	1	5.63016e-11	131.66	DVFTK(1)GYGFGLIK	2	0.76596	2	0.765	0.794	0.754	1.198	1.157	1.128
Cellular Component	GO:0098793	5	presynapse	0.155184	Q7L576	1188	1.882	Up	5.6212e-05	K	Cytoplasmic FMR1-interacting protein 1 OS=Homo sapiens OX=9606 GN=CYFIP1 PE=1 SV=1	CYFIP1	0.999952	0.000231257	89.231	VQK(1)HDGKDEIIK	4	-1.3205	2	0.634	0.688	0.65	1.296	1.192	1.224
Cellular Component	GO:0098793	5	presynapse	0.155184	P17301	261	4.97	Up	7.7205e-05	K	Integrin alpha-2 OS=Homo sapiens OX=9606 GN=ITGA2 PE=1 SV=1	ITGA2	1	5.75495e-08	138.89	K(1)YAYSAASGGR	2	-0.52946	1	0.253	0.307	0.334	1.631	1.406	1.406
Cellular Component	GO:0008540	9	proteasome regulatory particle, base subcomplex	0.203449	P62333	206	2.136	Up	0.00048094	K	26S proteasome regulatory subunit 10B OS=Homo sapiens OX=9606 GN=PSMC6 PE=1 SV=1	PSMC6	1	0.000150997	83.37	VVSSSIVDK(1)YIGESAR	3	-0.50553	1	0.626	0.649	0.518	1.227	1.325	1.278
Cellular Component	GO:0008540	9	proteasome regulatory particle, base subcomplex	0.203449	P62333	322	1.784	Up	0.040963	K	26S proteasome regulatory subunit 10B OS=Homo sapiens OX=9606 GN=PSMC6 PE=1 SV=1	PSMC6	1	3.68076e-07	92.39	IHAGPITK(1)HGEIDYEAIVK	4	0.89264	1	0.667	0.664	0.727	1.374	1.471	0.826
Cellular Component	GO:0008540	9	proteasome regulatory particle, base subcomplex	0.203449	P62195	330	2.306	Up	0.0105445	K	26S proteasome regulatory subunit 8 OS=Homo sapiens OX=9606 GN=PSMC5 PE=1 SV=1	PSMC5	1	0.006593	64.82	LDILK(1)IHSR	3	-0.7783	1	0.602	0.591	0.492	0.932	1.66	1.293
Cellular Component	GO:0044448	10	cell cortex part	0.197927	P21333	994	1.525	Up	1.9772e-05	K	Filamin-A OS=Homo sapiens OX=9606 GN=FLNA PE=1 SV=4	FLNA	1	0.00346172	85.813	DQEFTVK(1)SK	3	-0.051795	2	0.786	0.743	0.763	1.155	1.183	1.157
Cellular Component	GO:0044448	10	cell cortex part	0.197927	Q13813	296	1.717	Up	0.0100175	K	Spectrin alpha chain, non-erythrocytic 1 OS=Homo sapiens OX=9606 GN=SPTAN1 PE=1 SV=3	SPTAN1	1	0.0243338	65.246	K(1)HEGLER	3	1.0588	1	0.744	0.691	0.678	1.258	1.405	0.965
Cellular Component	GO:0044448	10	cell cortex part	0.197927	Q12797	336	1.771	Up	0.0099388	K	Aspartyl/asparaginyl beta-hydroxylase OS=Homo sapiens OX=9606 GN=ASPH PE=1 SV=3	ASPH	1	0.0197409	87.476	LLNK(1)FDK	2	2.2137	1	0.759	0.622	0.682	1.221	1.227	1.206
Cellular Component	GO:0044448	10	cell cortex part	0.197927	Q14247	161	1.788	Up	3.79e-05	K	Src substrate cortactin OS=Homo sapiens OX=9606 GN=CTTN PE=1 SV=2	CTTN	1	5.64477e-17	133.78	DYSSGFGGK(1)YGVQADR	2	0.1629	2	0.677	0.659	0.712	1.252	1.23	1.179
Cellular Component	GO:0044448	10	cell cortex part	0.197927	Q14247	198	1.588	Up	0.00024373	K	Src substrate cortactin OS=Homo sapiens OX=9606 GN=CTTN PE=1 SV=2	CTTN	1	6.55628e-07	113.24	GFGGK(1)YGIDK	3	-0.15514	2	0.734	0.77	0.724	1.251	1.119	1.169
Cellular Component	GO:0044448	10	cell cortex part	0.197927	O43707	779	1.506	Up	4.621e-06	K	Alpha-actinin-4 OS=Homo sapiens OX=9606 GN=ACTN4 PE=1 SV=2	ACTN4	1	2.1119e-07	92.098	ASFNHFDK(1)DHGGALGPEEFK	4	-0.48137	1	0.769	0.755	0.788	1.156	1.148	1.177
Cellular Component	GO:0001669	11	acrosomal vesicle	0.138441	Q15643	819	1.941	Up	0.000179346	K	Thyroid receptor-interacting protein 11 OS=Homo sapiens OX=9606 GN=TRIP11 PE=1 SV=3	TRIP11	1	0.025517	51.346	EIFIEK(1)LK	3	0.83552	1	0.602	0.698	0.625	1.244	1.199	1.294
Cellular Component	GO:0001669	11	acrosomal vesicle	0.138441	P35221	881	1.511	Up	0.00040268	K	Catenin alpha-1 OS=Homo sapiens OX=9606 GN=CTNNA1 PE=1 SV=1	CTNNA1	1	0.00164808	73.927	EKQDETQTK(1)IK	3	0.98541	1	0.774	0.811	0.723	1.193	1.172	1.122
Cellular Component	GO:0001669	11	acrosomal vesicle	0.138441	Q03135	57	1.523	Up	0.0012176	K	Caveolin-1 OS=Homo sapiens OX=9606 GN=CAV1 PE=1 SV=4	CAV1	1	0.00201216	67.997	DPK(1)HLNDDVVK	3	1.0261	1	0.694	0.781	0.816	1.145	1.139	1.206
Cellular Component	GO:0009986	4	cell surface	4.33412e-05	P23229	144	3.768	Up	1.57151e-05	K	Integrin alpha-6 OS=Homo sapiens OX=9606 GN=ITGA6 PE=1 SV=5	ITGA6	1	3.1719e-06	130.01	QHVNTK(1)QESR	2	1.0391	2	0.354	0.398	0.382	1.474	1.325	1.474
Cellular Component	GO:0009986	4	cell surface	4.33412e-05	P23229	594	2.852	Up	0.0097615	K	Integrin alpha-6 OS=Homo sapiens OX=9606 GN=ITGA6 PE=1 SV=5	ITGA6	1	0.0014851	102.53	YTQELTLK(1)R	2	0.55207	2	0.382	0.524	0.521	1.331	1.345	1.394
Cellular Component	GO:0009986	4	cell surface	4.33412e-05	O75487	44	1.652	Up	4.6607e-06	K	Glypican-4 OS=Homo sapiens OX=9606 GN=GPC4 PE=1 SV=4	GPC4	1	1.65724e-10	118.72	GFNK(1)NDAPLHEINGDHLK	4	0.22408	2	0.727	0.708	0.733	1.228	1.179	1.174
Cellular Component	GO:0009986	4	cell surface	4.33412e-05	Q4VCS5	585	2.51	Up	9.7814e-08	K	Angiomotin OS=Homo sapiens OX=9606 GN=AMOT PE=1 SV=1	AMOT	1	0.0447623	40.941	DQALSNAQAK(1)VVK	2	0.43599	1	0.537	0.526	0.519	1.311	1.317	1.343
Cellular Component	GO:0009986	4	cell surface	4.33412e-05	P09429	90	1.761	Up	0.000121985	K	High mobility group protein B1 OS=Homo sapiens OX=9606 GN=HMGB1 PE=1 SV=3	HMGB1	1	0.014499	80.688	FK(1)DPNAPK	2	-0.291	2	0.677	0.691	0.704	1.289	1.223	1.136
Cellular Component	GO:0009986	4	cell surface	4.33412e-05	P30101	494	1.633	Up	0.00061616	K	Protein disulfide-isomerase A3 OS=Homo sapiens OX=9606 GN=PDIA3 PE=1 SV=4	PDIA3	1	1.11552e-22	158.91	EATNPPVIQEEK(1)PK	2	-0.21724	3	0.713	0.703	0.767	1.119	1.287	1.158
Cellular Component	GO:0009986	4	cell surface	4.33412e-05	Q99623	296	2.159	Up	1.93966e-05	K	Prohibitin-2 OS=Homo sapiens OX=9606 GN=PHB2 PE=1 SV=2	PHB2	1	0.0114077	74.841	GSDSLIK(1)GK	2	0.45945	1	0.558	0.601	0.619	1.273	1.305	1.261
Cellular Component	GO:0009986	4	cell surface	4.33412e-05	Q99623	216	1.59	Up	0.000140435	K	Prohibitin-2 OS=Homo sapiens OX=9606 GN=PHB2 PE=1 SV=2	PHB2	1	0.000626104	118.28	AQFLVEK(1)AK	3	0.30393	2	0.778	0.746	0.704	1.199	1.198	1.146
Cellular Component	GO:0009986	4	cell surface	4.33412e-05	P08174	161	4.927	Up	1.8954e-06	K	Complement decay-accelerating factor OS=Homo sapiens OX=9606 GN=CD55 PE=1 SV=4	CD55	1	0.000511591	92.611	K(1)SCPNPGEIR	2	-0.92109	3	0.289	0.285	0.326	1.505	1.493	1.436
Cellular Component	GO:0009986	4	cell surface	4.33412e-05	P17301	261	4.97	Up	7.7205e-05	K	Integrin alpha-2 OS=Homo sapiens OX=9606 GN=ITGA2 PE=1 SV=1	ITGA2	1	5.75495e-08	138.89	K(1)YAYSAASGGR	2	-0.52946	1	0.253	0.307	0.334	1.631	1.406	1.406
Cellular Component	GO:0009986	4	cell surface	4.33412e-05	P08195	266	1.608	Up	0.00037925	K	4F2 cell-surface antigen heavy chain OS=Homo sapiens OX=9606 GN=SLC3A2 PE=1 SV=3	SLC3A2	1	3.45387e-05	99.788	GLVLGPIHK(1)NQK	3	-0.25361	1	0.772	0.719	0.718	1.155	1.268	1.129
Cellular Component	GO:0009986	4	cell surface	4.33412e-05	Q9NXR1	79	2.652	Up	1.5218e-06	K	Nuclear distribution protein nudE homolog 1 OS=Homo sapiens OX=9606 GN=NDE1 PE=1 SV=3	NDE1	1	0.0414988	56.404	MELETIK(1)EK	2	-1.519	1	0.499	0.53	0.486	1.352	1.333	1.333
Cellular Component	GO:0009986	4	cell surface	4.33412e-05	P35232	202	1.61	Up	6.4106e-05	K	Prohibitin OS=Homo sapiens OX=9606 GN=PHB PE=1 SV=1	PHB	1	8.49153e-05	104.22	FVVEK(1)AEQQK	3	1.0761	1	0.727	0.772	0.707	1.186	1.162	1.203
Cellular Component	GO:0009986	4	cell surface	4.33412e-05	P15692	149	1.52	Up	0.0183197	K	Vascular endothelial growth factor A OS=Homo sapiens OX=9606 GN=VEGFA PE=1 SV=2	VEGFA	1	0.0158118	68.016	GK(1)GK(1)GQK(1)R	3	0.20842	1	0.619	0.836	0.835	1.054	1.197	1.23
Cellular Component	GO:0009986	4	cell surface	4.33412e-05	P15692	147	1.52	Up	0.0183197	K	Vascular endothelial growth factor A OS=Homo sapiens OX=9606 GN=VEGFA PE=1 SV=2	VEGFA	1	0.0158118	68.016	GK(1)GK(1)GQK(1)R	3	0.20842	1	0.619	0.836	0.835	1.054	1.197	1.23
Cellular Component	GO:0009986	4	cell surface	4.33412e-05	P15692	152	1.52	Up	0.0183197	K	Vascular endothelial growth factor A OS=Homo sapiens OX=9606 GN=VEGFA PE=1 SV=2	VEGFA	1	0.0158118	68.016	GK(1)GK(1)GQK(1)R	3	0.20842	1	0.619	0.836	0.835	1.054	1.197	1.23
Cellular Component	GO:0009986	4	cell surface	4.33412e-05	Q9Y696	146	1.747	Up	0.000158095	K	Chloride intracellular channel protein 4 OS=Homo sapiens OX=9606 GN=CLIC4 PE=1 SV=4	CLIC4	1	0.00711757	91.867	GLLK(1)TLQK	2	0.55617	1	0.693	0.685	0.705	1.273	1.121	1.245
Cellular Component	GO:0009986	4	cell surface	4.33412e-05	P18564	548	1.991	Up	0.0032991	K	Integrin beta-6 OS=Homo sapiens OX=9606 GN=ITGB6 PE=1 SV=2	ITGB6	1	9.92231e-07	77.037	HK(1)GLLCGGNGDCDCGECVCR	3	-0.47256	1	0.5	0.688	0.699	1.2	1.299	1.258
Cellular Component	GO:0009986	4	cell surface	4.33412e-05	P35580	1782	1.618	Up	0.00133836	K	Myosin-10 OS=Homo sapiens OX=9606 GN=MYH10 PE=1 SV=3	MYH10	1	0.000848405	90.614	SAAQK(1)SDNAR	2	-0.18483	1	0.811	0.675	0.713	1.145	1.249	1.164
Cellular Component	GO:0009986	4	cell surface	4.33412e-05	P13726	233	2.168	Up	0.00033987	K	Tissue factor OS=Homo sapiens OX=9606 GN=F3 PE=1 SV=1	F3	1	2.77667e-05	95.57	K(1)STDSPVECMGQEK	3	2.065	1	0.588	0.527	0.659	1.34	1.252	1.254
Cellular Component	GO:0009986	4	cell surface	4.33412e-05	P02749	303	21.341	Up	4.0011e-06	K	Beta-2-glycoprotein 1 OS=Homo sapiens OX=9606 GN=APOH PE=1 SV=3	APOH	1	7.12912e-09	145.31	VSFFCK(1)NK(1)EK	2	-0.45882	1	0.064	0.074	0.091	1.696	1.57	1.621
Cellular Component	GO:0009986	4	cell surface	4.33412e-05	P02749	301	6.988	Up	4.3035e-08	K	Beta-2-glycoprotein 1 OS=Homo sapiens OX=9606 GN=APOH PE=1 SV=3	APOH	1	7.12912e-09	145.31	VSFFCK(1)NK(1)EK	2	-0.45882	7	0.214	0.222	0.222	1.585	1.496	1.517
Cellular Component	GO:0009986	4	cell surface	4.33412e-05	P15291	348	1.811	Up	0.0005237	K	Beta-1,4-galactosyltransferase 1 OS=Homo sapiens OX=9606 GN=B4GALT1 PE=1 SV=5	B4GALT1	1	0.0295481	72.23	K(1)NEPNPQR	2	0.42742	1	0.751	0.632	0.648	1.279	1.22	1.18
Cellular Component	GO:0009986	4	cell surface	4.33412e-05	P13987	90	2.086	Up	2.1035e-06	K	CD59 glycoprotein OS=Homo sapiens OX=9606 GN=CD59 PE=1 SV=1	CD59	1	3.9152e-08	141.13	ENELTYYCCK(1)K	2	-0.33008	2	0.61	0.612	0.605	1.303	1.29	1.218
Cellular Component	GO:0009986	4	cell surface	4.33412e-05	P13987	66	1.753	Up	0.00061964	K	CD59 glycoprotein OS=Homo sapiens OX=9606 GN=CD59 PE=1 SV=1	CD59	1	4.46545e-17	135.72	CWK(1)FEHCNFNDVTTR	3	-2.6005	1	0.661	0.66	0.756	1.253	1.26	1.128
Cellular Component	GO:0009986	4	cell surface	4.33412e-05	P16422	106	1.604	Up	9.7064e-05	K	Epithelial cell adhesion molecule OS=Homo sapiens OX=9606 GN=EPCAM PE=1 SV=2	EPCAM	1	1.06393e-16	97.771	AKPEGALQNNDGLYDPDCDESGLFK(1)AK	4	-0.73346	3	0.778	0.711	0.724	1.211	1.164	1.175
Cellular Component	GO:0009986	4	cell surface	4.33412e-05	P16422	160	10.663	Up	1.6533e-07	K	Epithelial cell adhesion molecule OS=Homo sapiens OX=9606 GN=EPCAM PE=1 SV=2	EPCAM	1	0.000107872	110.08	EKPYDSK(1)SLR	2	-0.057166	2	0.152	0.147	0.146	1.691	1.532	1.522
Cellular Component	GO:0009986	4	cell surface	4.33412e-05	P11021	553	1.584	Up	0.00051646	K	Endoplasmic reticulum chaperone BiP OS=Homo sapiens OX=9606 GN=HSPA5 PE=1 SV=2	HSPA5	1	0.0198462	68.915	FAEEDK(1)K	3	0.25072	1	0.739	0.758	0.737	1.273	1.094	1.171
Cellular Component	GO:0009986	4	cell surface	4.33412e-05	P11021	352	1.593	Up	7.6558e-05	K	Endoplasmic reticulum chaperone BiP OS=Homo sapiens OX=9606 GN=HSPA5 PE=1 SV=2	HSPA5	1	0.000769989	104.22	VLEDSDLK(1)K	3	2.7364	2	0.731	0.73	0.76	1.123	1.214	1.2
Cellular Component	GO:0009986	4	cell surface	4.33412e-05	O95858	150	3.044	Up	4.4605e-08	K	Tetraspanin-15 OS=Homo sapiens OX=9606 GN=TSPAN15 PE=1 SV=1	TSPAN15	1	0.000671673	121.9	NIMDFVQK(1)K	2	-0.46164	1	0.453	0.46	0.442	1.365	1.376	1.384
Cellular Component	GO:0071682	11	endocytic vesicle lumen	0.0264129	P14625	467	2.375	Up	0.00132479	K	Endoplasmin OS=Homo sapiens OX=9606 GN=HSP90B1 PE=1 SV=1	HSP90B1	1	0.0260932	82.287	K(1)TLDMIK	2	-1.9897	1	0.517	0.571	0.564	1.316	1.312	1.296
Cellular Component	GO:0071682	11	endocytic vesicle lumen	0.0264129	P14625	473	1.531	Up	0.0021359	K	Endoplasmin OS=Homo sapiens OX=9606 GN=HSP90B1 PE=1 SV=1	HSP90B1	1	0.0291692	80.438	TLDMIK(1)K	3	-0.98878	2	0.833	0.741	0.715	1.239	1.084	1.181
Cellular Component	GO:0071682	11	endocytic vesicle lumen	0.0264129	Q92598	135	1.659	Up	0.00020381	K	Heat shock protein 105 kDa OS=Homo sapiens OX=9606 GN=HSPH1 PE=1 SV=1	HSPH1	1	1.99598e-06	72.585	K(1)PVTDCVISVPSFFTDAER	3	0.53078	1	0.698	0.742	0.722	1.273	1.184	1.129
Cellular Component	GO:0071682	11	endocytic vesicle lumen	0.0264129	Q9Y4L1	991	1.814	Up	0.00105528	K	Hypoxia up-regulated protein 1 OS=Homo sapiens OX=9606 GN=HYOU1 PE=1 SV=1	HYOU1	1	0.0356549	68.657	EQSTGQK(1)R	2	-0.21595	1	0.705	0.586	0.734	1.194	1.25	1.23
Cellular Component	GO:0071682	11	endocytic vesicle lumen	0.0264129	Q9Y4L1	537	1.679	Up	0.00189553	K	Hypoxia up-regulated protein 1 OS=Homo sapiens OX=9606 GN=HYOU1 PE=1 SV=1	HYOU1	1	2.35366e-05	105.65	KYPDYESK(1)GIK	3	1.7955	1	0.728	0.644	0.773	1.297	1.201	1.103
Cellular Component	GO:0044454	12	nuclear chromosome part	0.0445392	P07910	176	1.934	Up	2.1133e-05	K	Heterogeneous nuclear ribonucleoproteins C1/C2 OS=Homo sapiens OX=9606 GN=HNRNPC PE=1 SV=4	HNRNPC	1	4.37087e-06	137.4	SGFNSK(1)SGQR	2	0.17987	2	0.61	0.654	0.667	1.26	1.219	1.256
Cellular Component	GO:0044454	12	nuclear chromosome part	0.0445392	P45973	91	1.882	Up	0.000176434	K	Chromobox protein homolog 5 OS=Homo sapiens OX=9606 GN=CBX5 PE=1 SV=1	CBX5	1	6.4636e-18	162.37	K(1)SNFSNSADDIK	2	-0.43997	1	0.616	0.7	0.656	1.302	1.23	1.179
Cellular Component	GO:0044454	12	nuclear chromosome part	0.0445392	P10412	63	1.615	Up	2.6726e-09	K	Histone H1.4 OS=Homo sapiens OX=9606 GN=H1-4 PE=1 SV=2	H1-4	1	0.000637306	85.355	SGVSLAALK(1)K	3	0.16261	1	0.734	0.735	0.733	1.191	1.181	1.184
Cellular Component	GO:0044454	12	nuclear chromosome part	0.0445392	P39748	375	1.672	Up	0.00041838	K	Flap endonuclease 1 OS=Homo sapiens OX=9606 GN=FEN1 PE=1 SV=1	FEN1	1	0.00781029	71.379	TGAAGK(1)FK	3	0.36582	1	0.705	0.708	0.735	1.166	1.305	1.121
Cellular Component	GO:0044454	12	nuclear chromosome part	0.0445392	Q16531	191	1.804	Up	3.8213e-05	K	DNA damage-binding protein 1 OS=Homo sapiens OX=9606 GN=DDB1 PE=1 SV=1	DDB1	1	5.7889e-05	94.363	HVK(1)TYEVSLR	3	-1.2231	2	0.644	0.677	0.712	1.233	1.223	1.211
Cellular Component	GO:0044454	12	nuclear chromosome part	0.0445392	Q96KK5	37	1.556	Up	0.00027896	K	Histone H2A type 1-H OS=Homo sapiens OX=9606 GN=HIST1H2AH PE=1 SV=3	HIST1H2AH	1	0.012122	96.311	K(1)GNYAER	2	0.80708	1	0.728	0.743	0.79	1.238	1.142	1.138
Cellular Component	GO:0044454	12	nuclear chromosome part	0.0445392	Q96KK5	96	1.532	Up	0.000135907	K	Histone H2A type 1-H OS=Homo sapiens OX=9606 GN=HIST1H2AH PE=1 SV=3	HIST1H2AH	1	3.40253e-08	141.58	NDEELNK(1)LLGK	2	-0.23047	2	0.728	0.792	0.764	1.153	1.204	1.141
Cellular Component	GO:0044454	12	nuclear chromosome part	0.0445392	Q96KK5	126	1.639	Up	7.7928e-05	K	Histone H2A type 1-H OS=Homo sapiens OX=9606 GN=HIST1H2AH PE=1 SV=3	HIST1H2AH	1	0.00072571	91.318	TESHHK(1)AK	3	0.69454	6	0.726	0.693	0.76	1.222	1.176	1.174
Cellular Component	GO:0044454	12	nuclear chromosome part	0.0445392	P27694	163	2.076	Up	1.81648e-05	K	Replication protein A 70 kDa DNA-binding subunit OS=Homo sapiens OX=9606 GN=RPA1 PE=1 SV=2	RPA1	1	9.99335e-08	143.97	AYGASK(1)TFGK	3	1.1683	2	0.616	0.618	0.6	1.341	1.243	1.224
Cellular Component	GO:0044454	12	nuclear chromosome part	0.0445392	P78527	3642	1.51	Up	2.3019e-05	K	DNA-dependent protein kinase catalytic subunit OS=Homo sapiens OX=9606 GN=PRKDC PE=1 SV=3	PRKDC	1	0.0283698	49.715	EFDK(1)HFGK	3	0.53551	1	0.784	0.759	0.766	1.191	1.169	1.127
Cellular Component	GO:0044454	12	nuclear chromosome part	0.0445392	Q96T88	546	1.987	Up	0.0040585	K	E3 ubiquitin-protein ligase UHRF1 OS=Homo sapiens OX=9606 GN=UHRF1 PE=1 SV=1	UHRF1	1	0.000183326	96.059	NSK(1)YAPAEGNR	2	0.1761	1	0.675	0.581	0.638	1.244	1.265	1.255
Cellular Component	GO:0044454	12	nuclear chromosome part	0.0445392	P62805	92	2.182	Up	1.6411e-05	K	Histone H4 OS=Homo sapiens OX=9606 GN=H4C1 PE=1 SV=2	H4C1	1	6.24962e-36	186.16	TVTAMDVVYALK(1)R	2	-0.23684	16	0.562	0.581	0.621	1.289	1.292	1.268
Cellular Component	GO:0044454	12	nuclear chromosome part	0.0445392	P62805	32	1.653	Up	0.0134408	K	Histone H4 OS=Homo sapiens OX=9606 GN=H4C1 PE=1 SV=2	H4C1	1	3.04485e-08	128.68	DNIQGITK(1)PAIR	2	0.4573	2	0.677	0.679	0.809	1.203	1.199	1.177
Cellular Component	GO:0044454	12	nuclear chromosome part	0.0445392	P62805	80	2.391	Up	2.114e-07	K	Histone H4 OS=Homo sapiens OX=9606 GN=H4C1 PE=1 SV=2	H4C1	1	3.87738e-17	153.23	K(1)TVTAMDVVYALK(1)R	3	-0.75923	21	0.556	0.541	0.548	1.342	1.293	1.298
Cellular Component	GO:0044454	12	nuclear chromosome part	0.0445392	P62805	78	1.846	Up	1.73873e-05	K	Histone H4 OS=Homo sapiens OX=9606 GN=H4C1 PE=1 SV=2	H4C1	1	3.72767e-11	151.98	DAVTYTEHAK(1)R	2	0.33428	3	0.693	0.658	0.65	1.26	1.199	1.235
Cellular Component	GO:0044454	12	nuclear chromosome part	0.0445392	P62805	17	1.611	Up	2.4396e-05	K	Histone H4 OS=Homo sapiens OX=9606 GN=H4C1 PE=1 SV=2	H4C1	1	1.37446e-45	190.24	GLGK(1)GGAK(1)R	2	-1.3239	136	0.728	0.747	0.73	1.202	1.136	1.215
Cellular Component	GO:0044454	12	nuclear chromosome part	0.0445392	Q14566	407	1.656	Up	0.00065503	K	DNA replication licensing factor MCM6 OS=Homo sapiens OX=9606 GN=MCM6 PE=1 SV=1	MCM6	1	0.0114761	46.318	SQFLK(1)HVEEFSPR	3	-1.3201	1	0.727	0.75	0.689	1.303	1.168	1.116
Cellular Component	GO:0044454	12	nuclear chromosome part	0.0445392	Q71UI9	8	1.776	Up	7.1996e-08	K	Histone H2A.V OS=Homo sapiens OX=9606 GN=H2AFV PE=1 SV=3	H2AFV	1	5.25348e-06	111.64	AGK(1)DSGK(1)AK(1)AK	2	0.56256	10	0.682	0.683	0.692	1.231	1.214	1.209
Cellular Component	GO:0044454	12	nuclear chromosome part	0.0445392	Q71UI9	12	1.771	Up	4.7604e-08	K	Histone H2A.V OS=Homo sapiens OX=9606 GN=H2AFV PE=1 SV=3	H2AFV	1	5.25348e-06	111.64	AGK(1)DSGK(1)AK(1)AK	2	0.56256	8	0.684	0.688	0.689	1.228	1.219	1.203
Cellular Component	GO:0044454	12	nuclear chromosome part	0.0445392	Q71UI9	14	1.84	Up	6.056e-07	K	Histone H2A.V OS=Homo sapiens OX=9606 GN=H2AFV PE=1 SV=3	H2AFV	1	0.00142022	96.464	AGK(1)DSGK(1)AK(1)AK	2	0.56256	2	0.675	0.674	0.655	1.23	1.211	1.247
Cellular Component	GO:0044454	12	nuclear chromosome part	0.0445392	Q99525	17	1.747	Up	0.020535	K	Histone H4-like protein type G OS=Homo sapiens OX=9606 GN=HIST1H4G PE=1 SV=1	HIST1H4G	1	0.00152844	84.31	GLGK(1)GGAK(1)CHR	3	1.0158	1	0.68	0.775	0.62	1.094	0.996	1.535
Cellular Component	GO:0044454	12	nuclear chromosome part	0.0445392	P26583	3	2.956	Up	1.481e-06	K	High mobility group protein B2 OS=Homo sapiens OX=9606 GN=HMGB2 PE=1 SV=2	HMGB2	0.999989	0.00434355	72.928	GK(1)GDPNKPR	3	-2.3564	2	0.457	0.487	0.444	1.378	1.343	1.382
Cellular Component	GO:0044454	12	nuclear chromosome part	0.0445392	P11387	252	1.611	Up	0.0086001	K	DNA topoisomerase 1 OS=Homo sapiens OX=9606 GN=TOP1 PE=1 SV=2	TOP1	1	0.00441055	51.771	LSPK(1)AEEVATFFAK	3	-3.501	1	0.684	0.692	0.831	1.198	1.332	1.025
Cellular Component	GO:0044454	12	nuclear chromosome part	0.0445392	P11387	218	1.572	Up	0.0049752	K	DNA topoisomerase 1 OS=Homo sapiens OX=9606 GN=TOP1 PE=1 SV=2	TOP1	1	0.00578621	85.212	WK(1)FLEHK	3	-0.5485	1	0.654	0.728	0.858	1.154	1.144	1.224
Cellular Component	GO:0044454	12	nuclear chromosome part	0.0445392	Q92793	1811	7.596	Up	0.00094031	K	CREB-binding protein OS=Homo sapiens OX=9606 GN=CREBBP PE=1 SV=3	CREBBP	1	0.00377762	83.182	K(1)TNGGCPVCK	2	0.18561	1	0.185	0.196	0.228	1.546	1.535	1.545
Cellular Component	GO:0044454	12	nuclear chromosome part	0.0445392	P0C0S5	8	2.197	Up	4.9094e-07	K	Histone H2A.Z OS=Homo sapiens OX=9606 GN=H2AZ1 PE=1 SV=2	H2AZ1	1	2.41356e-07	111.64	AGK(1)DSGK(1)AK(1)TK	2	0.79948	12	0.591	0.582	0.583	1.323	1.257	1.278
Cellular Component	GO:0044454	12	nuclear chromosome part	0.0445392	P0C0S5	12	2.225	Up	3.9617e-07	K	Histone H2A.Z OS=Homo sapiens OX=9606 GN=H2AZ1 PE=1 SV=2	H2AZ1	1	2.41356e-07	111.64	AGK(1)DSGK(1)AK(1)TK	2	0.79948	10	0.585	0.579	0.575	1.326	1.264	1.279
Cellular Component	GO:0044454	12	nuclear chromosome part	0.0445392	P0C0S5	5	1.669	Up	5.8561e-05	K	Histone H2A.Z OS=Homo sapiens OX=9606 GN=H2AZ1 PE=1 SV=2	H2AZ1	1	2.41356e-07	111.64	AGGK(1)AGK(1)DSGK(1)AK(1)TK	2	0.11281	10	0.749	0.714	0.689	1.227	1.164	1.201
Cellular Component	GO:0044454	12	nuclear chromosome part	0.0445392	P0C0S5	14	2.729	Up	2.1717e-06	K	Histone H2A.Z OS=Homo sapiens OX=9606 GN=H2AZ1 PE=1 SV=2	H2AZ1	1	2.41356e-07	106.57	AGK(1)DSGK(1)AK(1)TK	2	0.79948	4	0.511	0.491	0.48	1.402	1.295	1.348
Cellular Component	GO:0022626	10	cytosolic ribosome	0.0604913	P18124	223	1.556	Up	0.00049647	K	60S ribosomal protein L7 OS=Homo sapiens OX=9606 GN=RPL7 PE=1 SV=1	RPL7	1	2.59475e-29	179.94	K(1)TTHFVEGGDAGNREDQINR	3	-0.098351	4	0.789	0.778	0.693	1.183	1.144	1.19
Cellular Component	GO:0022626	10	cytosolic ribosome	0.0604913	P61254	134	1.568	Up	0.00037638	K	60S ribosomal protein L26 OS=Homo sapiens OX=9606 GN=RPL26 PE=1 SV=1	RPL26	0.995798	0.000775493	81.92	GK(0.996)YK(0.004)EETIEK	3	0.22442	1	0.805	0.735	0.71	1.213	1.158	1.157
Cellular Component	GO:0022626	10	cytosolic ribosome	0.0604913	P61313	14	2.205	Up	0.0066215	K	60S ribosomal protein L15 OS=Homo sapiens OX=9606 GN=RPL15 PE=1 SV=2	RPL15	1	0.0353652	47.082	K(1)QSDVMR	2	-0.43104	1	0.66	0.558	0.534	1.303	1.291	1.269
Cellular Component	GO:0022626	10	cytosolic ribosome	0.0604913	P15880	275	3.946	Up	0.020878	K	40S ribosomal protein S2 OS=Homo sapiens OX=9606 GN=RPS2 PE=1 SV=2	RPS2	1	0.00013314	66.289	SPYQEFTDHLVK(1)THTR	4	-0.31731	1		0.19	0.445	1.296	1.113	1.35
Cellular Component	GO:0022626	10	cytosolic ribosome	0.0604913	P46778	55	1.674	Up	0.00098052	K	60S ribosomal protein L21 OS=Homo sapiens OX=9606 GN=RPL21 PE=1 SV=2	RPL21	1	0.00221016	70.908	GMPHK(1)CYHGK	4	-0.32018	1	0.73	0.741	0.677	1.302	1.087	1.207
Cellular Component	GO:0022626	10	cytosolic ribosome	0.0604913	P62263	106	4.268	Up	8.5519e-07	K	40S ribosomal protein S14 OS=Homo sapiens OX=9606 GN=RPS14 PE=1 SV=3	RPS14	1	0.000851749	84.173	TK(1)TPGPGAQSALR	2	-2.5539	1	0.322	0.351	0.346	1.465	1.393	1.491
Cellular Component	GO:0022626	10	cytosolic ribosome	0.0604913	P62263	96	1.537	Up	0.0272	K	40S ribosomal protein S14 OS=Homo sapiens OX=9606 GN=RPS14 PE=1 SV=3	RPS14	1	7.38528e-07	110.08	ELGITALHIK(1)LR	3	0.52572	2	0.692	0.795	0.788	0.974	1.432	1.09
Cellular Component	GO:0022626	10	cytosolic ribosome	0.0604913	P62917	46	1.894	Up	1.75293e-05	K	60S ribosomal protein L8 OS=Homo sapiens OX=9606 GN=RPL8 PE=1 SV=2	RPL8	1	0.000128202	96.464	GIVK(1)DIIHDPGR	2	-0.25301	2	0.668	0.643	0.653	1.287	1.189	1.244
Cellular Component	GO:0022626	10	cytosolic ribosome	0.0604913	P39023	66	1.637	Up	1.8678e-05	K	60S ribosomal protein L3 OS=Homo sapiens OX=9606 GN=RPL3 PE=1 SV=2	RPL3	1	0.0020035	71.153	EVDRPGSK(1)VNK	3	-0.11062	1	0.705	0.753	0.721	1.174	1.195	1.199
Cellular Component	GO:0022626	10	cytosolic ribosome	0.0604913	P39023	115	1.601	Up	0.00150122	K	60S ribosomal protein L3 OS=Homo sapiens OX=9606 GN=RPL3 PE=1 SV=2	RPL3	1	0.000290809	84.734	TVFAEHISDECK(1)R	3	-0.2477	1	0.682	0.738	0.796	1.244	1.216	1.088
Cellular Component	GO:0022626	10	cytosolic ribosome	0.0604913	P62753	243	1.631	Up	0.000121433	K	40S ribosomal protein S6 OS=Homo sapiens OX=9606 GN=RPS6 PE=1 SV=1	RPS6	1	1.94239e-06	121.29	ASTSK(1)SESSQK	2	0.72863	2	0.736	0.685	0.766	1.194	1.197	1.175
Cellular Component	GO:0022626	10	cytosolic ribosome	0.0604913	Q02878	192	1.535	Up	0.00026491	K	60S ribosomal protein L6 OS=Homo sapiens OX=9606 GN=RPL6 PE=1 SV=3	RPL6	1	0.000693341	75.589	THQK(1)FVIATSTK	3	-0.46954	1	0.74	0.814	0.728	1.184	1.162	1.156
Cellular Component	GO:0022626	10	cytosolic ribosome	0.0604913	P46777	27	1.597	Up	0.00119775	K	60S ribosomal protein L5 OS=Homo sapiens OX=9606 GN=RPL5 PE=1 SV=3	RPL5	1	0.0161426	70.412	EGK(1)TDYYAR	2	-0.47447	2	0.68	0.764	0.777	1.268	1.167	1.111
Cellular Component	GO:0022626	10	cytosolic ribosome	0.0604913	P62249	26	1.879	Up	0.0027232	K	40S ribosomal protein S16 OS=Homo sapiens OX=9606 GN=RPS16 PE=1 SV=2	RPS16	1	0.0195879	51.762	TATAVAHCK(1)R	3	-0.38563	1	0.581	0.604	0.786	1.233	1.194	1.277
Cellular Component	GO:0022626	10	cytosolic ribosome	0.0604913	P62277	34	1.54	Up	5.7354e-05	K	40S ribosomal protein S13 OS=Homo sapiens OX=9606 GN=RPS13 PE=1 SV=2	RPS13	1	4.38739e-08	131.35	LTSDDVK(1)EQIYK	2	0.23715	1	0.761	0.744	0.773	1.215	1.163	1.13
Cellular Component	GO:0022626	10	cytosolic ribosome	0.0604913	P62269	137	1.73	Up	2.4191e-06	K	40S ribosomal protein S18 OS=Homo sapiens OX=9606 GN=RPS18 PE=1 SV=3	RPS18	1	0.00404982	83.438	GQHTK(1)TTGR	2	0.13381	2	0.682	0.709	0.705	1.22	1.182	1.224
Cellular Component	GO:0042645	11	mitochondrial nucleoid	0.0837966	Q9NVI7	165	1.985	Up	0.0004845	K	ATPase family AAA domain-containing protein 3A OS=Homo sapiens OX=9606 GN=ATAD3A PE=1 SV=2	ATAD3A	1	0.00698013	92.538	K(1)TLSEETR	2	-0.5115	1	0.56	0.7	0.634	1.294	1.234	1.232
Cellular Component	GO:0042645	11	mitochondrial nucleoid	0.0837966	P34897	200	1.553	Up	0.0024569	K	Serine hydroxymethyltransferase, mitochondrial OS=Homo sapiens OX=9606 GN=SHMT2 PE=1 SV=3	SHMT2	1	1.11032e-09	113.54	LNPK(1)TGLIDYNQLALTAR	3	-0.53359	1	0.671	0.753	0.836	1.158	1.146	1.206
Cellular Component	GO:0042645	11	mitochondrial nucleoid	0.0837966	P36776	367	1.766	Up	1.2118e-06	K	Lon protease homolog, mitochondrial OS=Homo sapiens OX=9606 GN=LONP1 PE=1 SV=2	LONP1	1	0.0134532	94.114	ALSLLK(1)K	2	0.1015	1	0.679	0.702	0.684	1.21	1.197	1.239
Cellular Component	GO:0042645	11	mitochondrial nucleoid	0.0837966	P21796	61	1.877	Up	2.673e-06	K	Voltage-dependent anion-selective channel protein 1 OS=Homo sapiens OX=9606 GN=VDAC1 PE=1 SV=2	VDAC1	1	0.00011548	117.25	VTGSLETK(1)YR	3	1.0352	3	0.663	0.636	0.677	1.244	1.244	1.221
Cellular Component	GO:0042645	11	mitochondrial nucleoid	0.0837966	P21796	20	1.506	Up	6.0692e-05	K	Voltage-dependent anion-selective channel protein 1 OS=Homo sapiens OX=9606 GN=VDAC1 PE=1 SV=2	VDAC1	1	5.63016e-11	131.66	DVFTK(1)GYGFGLIK	2	0.76596	2	0.765	0.794	0.754	1.198	1.157	1.128
Cellular Component	GO:0042645	11	mitochondrial nucleoid	0.0837966	P42704	1357	1.508	Up	0.00045917	K	Leucine-rich PPR motif-containing protein, mitochondrial OS=Homo sapiens OX=9606 GN=LRPPRC PE=1 SV=3	LRPPRC	1	0.0295481	72.23	LDDLFLK(1)R	2	0.38254	1	0.752	0.803	0.752	1.115	1.129	1.235
Cellular Component	GO:0098797	7	plasma membrane protein complex	0.176057	P18564	548	1.991	Up	0.0032991	K	Integrin beta-6 OS=Homo sapiens OX=9606 GN=ITGB6 PE=1 SV=2	ITGB6	1	9.92231e-07	77.037	HK(1)GLLCGGNGDCDCGECVCR	3	-0.47256	1	0.5	0.688	0.699	1.2	1.299	1.258
Cellular Component	GO:0098797	7	plasma membrane protein complex	0.176057	P23229	144	3.768	Up	1.57151e-05	K	Integrin alpha-6 OS=Homo sapiens OX=9606 GN=ITGA6 PE=1 SV=5	ITGA6	1	3.1719e-06	130.01	QHVNTK(1)QESR	2	1.0391	2	0.354	0.398	0.382	1.474	1.325	1.474
Cellular Component	GO:0098797	7	plasma membrane protein complex	0.176057	P23229	594	2.852	Up	0.0097615	K	Integrin alpha-6 OS=Homo sapiens OX=9606 GN=ITGA6 PE=1 SV=5	ITGA6	1	0.0014851	102.53	YTQELTLK(1)R	2	0.55207	2	0.382	0.524	0.521	1.331	1.345	1.394
Cellular Component	GO:0098797	7	plasma membrane protein complex	0.176057	O75197	526	6.771	Up	0.0093419	K	Low-density lipoprotein receptor-related protein 5 OS=Homo sapiens OX=9606 GN=LRP5 PE=1 SV=2	LRP5	1	0.0142367	76.073	TDK(1)IEVINVDGTK	2	2.3659	1	0.196	0.27	0.207	1.517	0.67	2.37
Cellular Component	GO:0098797	7	plasma membrane protein complex	0.176057	P35221	881	1.511	Up	0.00040268	K	Catenin alpha-1 OS=Homo sapiens OX=9606 GN=CTNNA1 PE=1 SV=1	CTNNA1	1	0.00164808	73.927	EKQDETQTK(1)IK	3	0.98541	1	0.774	0.811	0.723	1.193	1.172	1.122
Cellular Component	GO:0098797	7	plasma membrane protein complex	0.176057	P17301	261	4.97	Up	7.7205e-05	K	Integrin alpha-2 OS=Homo sapiens OX=9606 GN=ITGA2 PE=1 SV=1	ITGA2	1	5.75495e-08	138.89	K(1)YAYSAASGGR	2	-0.52946	1	0.253	0.307	0.334	1.631	1.406	1.406
Cellular Component	GO:0098802	7	plasma membrane receptor complex	0.110097	P18564	548	1.991	Up	0.0032991	K	Integrin beta-6 OS=Homo sapiens OX=9606 GN=ITGB6 PE=1 SV=2	ITGB6	1	9.92231e-07	77.037	HK(1)GLLCGGNGDCDCGECVCR	3	-0.47256	1	0.5	0.688	0.699	1.2	1.299	1.258
Cellular Component	GO:0098802	7	plasma membrane receptor complex	0.110097	P23229	144	3.768	Up	1.57151e-05	K	Integrin alpha-6 OS=Homo sapiens OX=9606 GN=ITGA6 PE=1 SV=5	ITGA6	1	3.1719e-06	130.01	QHVNTK(1)QESR	2	1.0391	2	0.354	0.398	0.382	1.474	1.325	1.474
Cellular Component	GO:0098802	7	plasma membrane receptor complex	0.110097	P23229	594	2.852	Up	0.0097615	K	Integrin alpha-6 OS=Homo sapiens OX=9606 GN=ITGA6 PE=1 SV=5	ITGA6	1	0.0014851	102.53	YTQELTLK(1)R	2	0.55207	2	0.382	0.524	0.521	1.331	1.345	1.394
Cellular Component	GO:0098802	7	plasma membrane receptor complex	0.110097	P17301	261	4.97	Up	7.7205e-05	K	Integrin alpha-2 OS=Homo sapiens OX=9606 GN=ITGA2 PE=1 SV=1	ITGA2	1	5.75495e-08	138.89	K(1)YAYSAASGGR	2	-0.52946	1	0.253	0.307	0.334	1.631	1.406	1.406
Cellular Component	GO:0044295	8	axonal growth cone	0.113715	Q13009	564	2.554	Up	2.264e-05	K	T-lymphoma invasion and metastasis-inducing protein 1 OS=Homo sapiens OX=9606 GN=TIAM1 PE=1 SV=2	TIAM1	1	0.00536023	86.794	LLK(1)SEIK	3	-0.69534	1	0.501	0.52	0.54	1.387	1.234	1.366
Cellular Component	GO:0044295	8	axonal growth cone	0.113715	Q7L576	1188	1.882	Up	5.6212e-05	K	Cytoplasmic FMR1-interacting protein 1 OS=Homo sapiens OX=9606 GN=CYFIP1 PE=1 SV=1	CYFIP1	0.999952	0.000231257	89.231	VQK(1)HDGKDEIIK	4	-1.3205	2	0.634	0.688	0.65	1.296	1.192	1.224
Cellular Component	GO:0015934	10	large ribosomal subunit	0.0909206	P18124	223	1.556	Up	0.00049647	K	60S ribosomal protein L7 OS=Homo sapiens OX=9606 GN=RPL7 PE=1 SV=1	RPL7	1	2.59475e-29	179.94	K(1)TTHFVEGGDAGNREDQINR	3	-0.098351	4	0.789	0.778	0.693	1.183	1.144	1.19
Cellular Component	GO:0015934	10	large ribosomal subunit	0.0909206	P09001	235	2.005	Up	0.00074339	K	39S ribosomal protein L3, mitochondrial OS=Homo sapiens OX=9606 GN=MRPL3 PE=1 SV=1	MRPL3	1	7.32746e-11	124.42	GQPATHGQTK(1)THR	3	-0.88038	2	0.604	0.565	0.712	1.324	1.19	1.258
Cellular Component	GO:0015934	10	large ribosomal subunit	0.0909206	P61254	134	1.568	Up	0.00037638	K	60S ribosomal protein L26 OS=Homo sapiens OX=9606 GN=RPL26 PE=1 SV=1	RPL26	0.995798	0.000775493	81.92	GK(0.996)YK(0.004)EETIEK	3	0.22442	1	0.805	0.735	0.71	1.213	1.158	1.157
Cellular Component	GO:0015934	10	large ribosomal subunit	0.0909206	P61313	14	2.205	Up	0.0066215	K	60S ribosomal protein L15 OS=Homo sapiens OX=9606 GN=RPL15 PE=1 SV=2	RPL15	1	0.0353652	47.082	K(1)QSDVMR	2	-0.43104	1	0.66	0.558	0.534	1.303	1.291	1.269
Cellular Component	GO:0015934	10	large ribosomal subunit	0.0909206	P46778	55	1.674	Up	0.00098052	K	60S ribosomal protein L21 OS=Homo sapiens OX=9606 GN=RPL21 PE=1 SV=2	RPL21	1	0.00221016	70.908	GMPHK(1)CYHGK	4	-0.32018	1	0.73	0.741	0.677	1.302	1.087	1.207
Cellular Component	GO:0015934	10	large ribosomal subunit	0.0909206	Q96DV4	148	2.049	Up	0.00029983	K	39S ribosomal protein L38, mitochondrial OS=Homo sapiens OX=9606 GN=MRPL38 PE=1 SV=2	MRPL38	1	0.00102008	84.083	TCGPYHK(1)QR	3	-0.20609	2	0.652	0.598	0.604	1.37	1.29	1.139
Cellular Component	GO:0015934	10	large ribosomal subunit	0.0909206	P62917	46	1.894	Up	1.75293e-05	K	60S ribosomal protein L8 OS=Homo sapiens OX=9606 GN=RPL8 PE=1 SV=2	RPL8	1	0.000128202	96.464	GIVK(1)DIIHDPGR	2	-0.25301	2	0.668	0.643	0.653	1.287	1.189	1.244
Cellular Component	GO:0015934	10	large ribosomal subunit	0.0909206	P39023	66	1.637	Up	1.8678e-05	K	60S ribosomal protein L3 OS=Homo sapiens OX=9606 GN=RPL3 PE=1 SV=2	RPL3	1	0.0020035	71.153	EVDRPGSK(1)VNK	3	-0.11062	1	0.705	0.753	0.721	1.174	1.195	1.199
Cellular Component	GO:0015934	10	large ribosomal subunit	0.0909206	P39023	115	1.601	Up	0.00150122	K	60S ribosomal protein L3 OS=Homo sapiens OX=9606 GN=RPL3 PE=1 SV=2	RPL3	1	0.000290809	84.734	TVFAEHISDECK(1)R	3	-0.2477	1	0.682	0.738	0.796	1.244	1.216	1.088
Cellular Component	GO:0015934	10	large ribosomal subunit	0.0909206	Q02878	192	1.535	Up	0.00026491	K	60S ribosomal protein L6 OS=Homo sapiens OX=9606 GN=RPL6 PE=1 SV=3	RPL6	1	0.000693341	75.589	THQK(1)FVIATSTK	3	-0.46954	1	0.74	0.814	0.728	1.184	1.162	1.156
Cellular Component	GO:0015934	10	large ribosomal subunit	0.0909206	P46777	27	1.597	Up	0.00119775	K	60S ribosomal protein L5 OS=Homo sapiens OX=9606 GN=RPL5 PE=1 SV=3	RPL5	1	0.0161426	70.412	EGK(1)TDYYAR	2	-0.47447	2	0.68	0.764	0.777	1.268	1.167	1.111
Cellular Component	GO:0015934	10	large ribosomal subunit	0.0909206	Q9BYC8	117	5.343	Up	2.3078e-07	K	39S ribosomal protein L32, mitochondrial OS=Homo sapiens OX=9606 GN=MRPL32 PE=1 SV=1	MRPL32	1	0.000231659	73.722	NNIDVCPECGHLK(1)QK	3	-2.4227	1	0.27	0.294	0.273	1.468	1.495	1.509
Cellular Component	GO:0031672	11	A band	0.203449	P04075	200	1.909	Up	0.00039957	K	Fructose-bisphosphate aldolase A OS=Homo sapiens OX=9606 GN=ALDOA PE=1 SV=2	ALDOA	1	1.06057e-28	125	YASICQQNGIVPIVEPEILPDGDHDLK(1)R	3	-1.6772	8	0.693	0.577	0.681	1.214	1.249	1.262
Cellular Component	GO:0031672	11	A band	0.203449	P04075	108	1.531	Up	0.00098334	K	Fructose-bisphosphate aldolase A OS=Homo sapiens OX=9606 GN=ALDOA PE=1 SV=2	ALDOA	1	0.000445929	92.866	GGVVGIK(1)VDK	2	0.15856	1	0.727	0.722	0.837	1.193	1.157	1.149
Cellular Component	GO:0031672	11	A band	0.203449	P61313	14	2.205	Up	0.0066215	K	60S ribosomal protein L15 OS=Homo sapiens OX=9606 GN=RPL15 PE=1 SV=2	RPL15	1	0.0353652	47.082	K(1)QSDVMR	2	-0.43104	1	0.66	0.558	0.534	1.303	1.291	1.269
Cellular Component	GO:1904724	12	tertiary granule lumen	0.268941	P04075	200	1.909	Up	0.00039957	K	Fructose-bisphosphate aldolase A OS=Homo sapiens OX=9606 GN=ALDOA PE=1 SV=2	ALDOA	1	1.06057e-28	125	YASICQQNGIVPIVEPEILPDGDHDLK(1)R	3	-1.6772	8	0.693	0.577	0.681	1.214	1.249	1.262
Cellular Component	GO:1904724	12	tertiary granule lumen	0.268941	P04075	108	1.531	Up	0.00098334	K	Fructose-bisphosphate aldolase A OS=Homo sapiens OX=9606 GN=ALDOA PE=1 SV=2	ALDOA	1	0.000445929	92.866	GGVVGIK(1)VDK	2	0.15856	1	0.727	0.722	0.837	1.193	1.157	1.149
Cellular Component	GO:1904724	12	tertiary granule lumen	0.268941	Q13813	296	1.717	Up	0.0100175	K	Spectrin alpha chain, non-erythrocytic 1 OS=Homo sapiens OX=9606 GN=SPTAN1 PE=1 SV=3	SPTAN1	1	0.0243338	65.246	K(1)HEGLER	3	1.0588	1	0.744	0.691	0.678	1.258	1.405	0.965
Cellular Component	GO:1904724	12	tertiary granule lumen	0.268941	Q7L576	1188	1.882	Up	5.6212e-05	K	Cytoplasmic FMR1-interacting protein 1 OS=Homo sapiens OX=9606 GN=CYFIP1 PE=1 SV=1	CYFIP1	0.999952	0.000231257	89.231	VQK(1)HDGKDEIIK	4	-1.3205	2	0.634	0.688	0.65	1.296	1.192	1.224
Cellular Component	GO:0031224	4	intrinsic component of membrane	0.00218143	Q9NVI7	165	1.985	Up	0.0004845	K	ATPase family AAA domain-containing protein 3A OS=Homo sapiens OX=9606 GN=ATAD3A PE=1 SV=2	ATAD3A	1	0.00698013	92.538	K(1)TLSEETR	2	-0.5115	1	0.56	0.7	0.634	1.294	1.234	1.232
Cellular Component	GO:0031224	4	intrinsic component of membrane	0.00218143	Q12797	336	1.771	Up	0.0099388	K	Aspartyl/asparaginyl beta-hydroxylase OS=Homo sapiens OX=9606 GN=ASPH PE=1 SV=3	ASPH	1	0.0197409	87.476	LLNK(1)FDK	2	2.2137	1	0.759	0.622	0.682	1.221	1.227	1.206
Cellular Component	GO:0031224	4	intrinsic component of membrane	0.00218143	P23229	144	3.768	Up	1.57151e-05	K	Integrin alpha-6 OS=Homo sapiens OX=9606 GN=ITGA6 PE=1 SV=5	ITGA6	1	3.1719e-06	130.01	QHVNTK(1)QESR	2	1.0391	2	0.354	0.398	0.382	1.474	1.325	1.474
Cellular Component	GO:0031224	4	intrinsic component of membrane	0.00218143	P23229	594	2.852	Up	0.0097615	K	Integrin alpha-6 OS=Homo sapiens OX=9606 GN=ITGA6 PE=1 SV=5	ITGA6	1	0.0014851	102.53	YTQELTLK(1)R	2	0.55207	2	0.382	0.524	0.521	1.331	1.345	1.394
Cellular Component	GO:0031224	4	intrinsic component of membrane	0.00218143	O75487	44	1.652	Up	4.6607e-06	K	Glypican-4 OS=Homo sapiens OX=9606 GN=GPC4 PE=1 SV=4	GPC4	1	1.65724e-10	118.72	GFNK(1)NDAPLHEINGDHLK	4	0.22408	2	0.727	0.708	0.733	1.228	1.179	1.174
Cellular Component	GO:0031224	4	intrinsic component of membrane	0.00218143	O75477	286	1.631	Up	0.00032495	K	Erlin-1 OS=Homo sapiens OX=9606 GN=ERLIN1 PE=1 SV=2	ERLIN1	1	0.010633	57.785	LTPEYLELK(1)K	3	0.42591	1	0.709	0.71	0.764	1.106	1.233	1.221
Cellular Component	GO:0031224	4	intrinsic component of membrane	0.00218143	Q4VCS5	585	2.51	Up	9.7814e-08	K	Angiomotin OS=Homo sapiens OX=9606 GN=AMOT PE=1 SV=1	AMOT	1	0.0447623	40.941	DQALSNAQAK(1)VVK	2	0.43599	1	0.537	0.526	0.519	1.311	1.317	1.343
Cellular Component	GO:0031224	4	intrinsic component of membrane	0.00218143	O95249	124	1.633	Up	0.0022039	K	Golgi SNAP receptor complex member 1 OS=Homo sapiens OX=9606 GN=GOSR1 PE=1 SV=1	GOSR1	1	2.93662e-06	104.95	DILQDYTHEFHK(1)TK	4	0.62103	1	0.768	0.648	0.771	1.278	1.109	1.185
Cellular Component	GO:0031224	4	intrinsic component of membrane	0.00218143	P22794	170	2.522	Up	4.4941e-05	K	Protein EVI2A OS=Homo sapiens OX=9606 GN=EVI2A PE=2 SV=2	EVI2A	1	0.0125926	48.284	SK(1)QVGK(1)RQPR	3	3.0827	2	0.525	0.495	0.558	1.346	1.397	1.237
Cellular Component	GO:0031224	4	intrinsic component of membrane	0.00218143	P22794	174	2.522	Up	4.4941e-05	K	Protein EVI2A OS=Homo sapiens OX=9606 GN=EVI2A PE=2 SV=2	EVI2A	1	0.0125926	48.284	SK(1)QVGK(1)RQPR	3	3.0827	2	0.525	0.495	0.558	1.346	1.397	1.237
Cellular Component	GO:0031224	4	intrinsic component of membrane	0.00218143	Q14247	161	1.788	Up	3.79e-05	K	Src substrate cortactin OS=Homo sapiens OX=9606 GN=CTTN PE=1 SV=2	CTTN	1	5.64477e-17	133.78	DYSSGFGGK(1)YGVQADR	2	0.1629	2	0.677	0.659	0.712	1.252	1.23	1.179
Cellular Component	GO:0031224	4	intrinsic component of membrane	0.00218143	Q14247	198	1.588	Up	0.00024373	K	Src substrate cortactin OS=Homo sapiens OX=9606 GN=CTTN PE=1 SV=2	CTTN	1	6.55628e-07	113.24	GFGGK(1)YGIDK	3	-0.15514	2	0.734	0.77	0.724	1.251	1.119	1.169
Cellular Component	GO:0031224	4	intrinsic component of membrane	0.00218143	P17301	261	4.97	Up	7.7205e-05	K	Integrin alpha-2 OS=Homo sapiens OX=9606 GN=ITGA2 PE=1 SV=1	ITGA2	1	5.75495e-08	138.89	K(1)YAYSAASGGR	2	-0.52946	1	0.253	0.307	0.334	1.631	1.406	1.406
Cellular Component	GO:0031224	4	intrinsic component of membrane	0.00218143	P08195	266	1.608	Up	0.00037925	K	4F2 cell-surface antigen heavy chain OS=Homo sapiens OX=9606 GN=SLC3A2 PE=1 SV=3	SLC3A2	1	3.45387e-05	99.788	GLVLGPIHK(1)NQK	3	-0.25361	1	0.772	0.719	0.718	1.155	1.268	1.129
Cellular Component	GO:0031224	4	intrinsic component of membrane	0.00218143	P35232	202	1.61	Up	6.4106e-05	K	Prohibitin OS=Homo sapiens OX=9606 GN=PHB PE=1 SV=1	PHB	1	8.49153e-05	104.22	FVVEK(1)AEQQK	3	1.0761	1	0.727	0.772	0.707	1.186	1.162	1.203
Cellular Component	GO:0031224	4	intrinsic component of membrane	0.00218143	O94905	287	1.947	Up	0.000141126	K	Erlin-2 OS=Homo sapiens OX=9606 GN=ERLIN2 PE=1 SV=1	ERLIN2	1	0.00766576	78.342	YK(1)AIASNSK	2	0.25171	1	0.588	0.669	0.666	1.295	1.242	1.207
Cellular Component	GO:0031224	4	intrinsic component of membrane	0.00218143	Q9Y696	146	1.747	Up	0.000158095	K	Chloride intracellular channel protein 4 OS=Homo sapiens OX=9606 GN=CLIC4 PE=1 SV=4	CLIC4	1	0.00711757	91.867	GLLK(1)TLQK	2	0.55617	1	0.693	0.685	0.705	1.273	1.121	1.245
Cellular Component	GO:0031224	4	intrinsic component of membrane	0.00218143	P13726	233	2.168	Up	0.00033987	K	Tissue factor OS=Homo sapiens OX=9606 GN=F3 PE=1 SV=1	F3	1	2.77667e-05	95.57	K(1)STDSPVECMGQEK	3	2.065	1	0.588	0.527	0.659	1.34	1.252	1.254
Cellular Component	GO:0031224	4	intrinsic component of membrane	0.00218143	P21796	61	1.877	Up	2.673e-06	K	Voltage-dependent anion-selective channel protein 1 OS=Homo sapiens OX=9606 GN=VDAC1 PE=1 SV=2	VDAC1	1	0.00011548	117.25	VTGSLETK(1)YR	3	1.0352	3	0.663	0.636	0.677	1.244	1.244	1.221
Cellular Component	GO:0031224	4	intrinsic component of membrane	0.00218143	P21796	20	1.506	Up	6.0692e-05	K	Voltage-dependent anion-selective channel protein 1 OS=Homo sapiens OX=9606 GN=VDAC1 PE=1 SV=2	VDAC1	1	5.63016e-11	131.66	DVFTK(1)GYGFGLIK	2	0.76596	2	0.765	0.794	0.754	1.198	1.157	1.128
Cellular Component	GO:0031224	4	intrinsic component of membrane	0.00218143	Q3KNS1	681	2.794	Up	4.0467e-05	K	Patched domain-containing protein 3 OS=Homo sapiens OX=9606 GN=PTCHD3 PE=1 SV=3	PTCHD3	1	0.0336516	40.496	LENCTK(1)IFEK	3	3.9422	1	0.52	0.493	0.44	1.312	1.401	1.346
Cellular Component	GO:0031224	4	intrinsic component of membrane	0.00218143	O75197	526	6.771	Up	0.0093419	K	Low-density lipoprotein receptor-related protein 5 OS=Homo sapiens OX=9606 GN=LRP5 PE=1 SV=2	LRP5	1	0.0142367	76.073	TDK(1)IEVINVDGTK	2	2.3659	1	0.196	0.27	0.207	1.517	0.67	2.37
Cellular Component	GO:0031224	4	intrinsic component of membrane	0.00218143	P15291	348	1.811	Up	0.0005237	K	Beta-1,4-galactosyltransferase 1 OS=Homo sapiens OX=9606 GN=B4GALT1 PE=1 SV=5	B4GALT1	1	0.0295481	72.23	K(1)NEPNPQR	2	0.42742	1	0.751	0.632	0.648	1.279	1.22	1.18
Cellular Component	GO:0031224	4	intrinsic component of membrane	0.00218143	P13987	90	2.086	Up	2.1035e-06	K	CD59 glycoprotein OS=Homo sapiens OX=9606 GN=CD59 PE=1 SV=1	CD59	1	3.9152e-08	141.13	ENELTYYCCK(1)K	2	-0.33008	2	0.61	0.612	0.605	1.303	1.29	1.218
Cellular Component	GO:0031224	4	intrinsic component of membrane	0.00218143	P13987	66	1.753	Up	0.00061964	K	CD59 glycoprotein OS=Homo sapiens OX=9606 GN=CD59 PE=1 SV=1	CD59	1	4.46545e-17	135.72	CWK(1)FEHCNFNDVTTR	3	-2.6005	1	0.661	0.66	0.756	1.253	1.26	1.128
Cellular Component	GO:0031224	4	intrinsic component of membrane	0.00218143	P27824	87	1.514	Up	0.00095527	K	Calnexin OS=Homo sapiens OX=9606 GN=CANX PE=1 SV=2	CANX	1	0.014782	46.88	GTLSGWILSK(1)AK	3	-0.67335	1	0.807	0.786	0.712	1.226	1.112	1.152
Cellular Component	GO:0031224	4	intrinsic component of membrane	0.00218143	P16422	106	1.604	Up	9.7064e-05	K	Epithelial cell adhesion molecule OS=Homo sapiens OX=9606 GN=EPCAM PE=1 SV=2	EPCAM	1	1.06393e-16	97.771	AKPEGALQNNDGLYDPDCDESGLFK(1)AK	4	-0.73346	3	0.778	0.711	0.724	1.211	1.164	1.175
Cellular Component	GO:0031224	4	intrinsic component of membrane	0.00218143	P16422	160	10.663	Up	1.6533e-07	K	Epithelial cell adhesion molecule OS=Homo sapiens OX=9606 GN=EPCAM PE=1 SV=2	EPCAM	1	0.000107872	110.08	EKPYDSK(1)SLR	2	-0.057166	2	0.152	0.147	0.146	1.691	1.532	1.522
Cellular Component	GO:0031224	4	intrinsic component of membrane	0.00218143	P47985	101	1.523	Up	0.031261	K	Cytochrome b-c1 complex subunit Rieske, mitochondrial OS=Homo sapiens OX=9606 GN=UQCRFS1 PE=1 SV=2	UQCRFS1	1	0.00038399	92.99	LEVLDSTK(1)SSR	2	-1.559	1	0.714	0.657	0.922	1.111	1.353	1.029
Cellular Component	GO:0031224	4	intrinsic component of membrane	0.00218143	P11021	553	1.584	Up	0.00051646	K	Endoplasmic reticulum chaperone BiP OS=Homo sapiens OX=9606 GN=HSPA5 PE=1 SV=2	HSPA5	1	0.0198462	68.915	FAEEDK(1)K	3	0.25072	1	0.739	0.758	0.737	1.273	1.094	1.171
Cellular Component	GO:0031224	4	intrinsic component of membrane	0.00218143	P11021	352	1.593	Up	7.6558e-05	K	Endoplasmic reticulum chaperone BiP OS=Homo sapiens OX=9606 GN=HSPA5 PE=1 SV=2	HSPA5	1	0.000769989	104.22	VLEDSDLK(1)K	3	2.7364	2	0.731	0.73	0.76	1.123	1.214	1.2
Cellular Component	GO:0031224	4	intrinsic component of membrane	0.00218143	O95858	150	3.044	Up	4.4605e-08	K	Tetraspanin-15 OS=Homo sapiens OX=9606 GN=TSPAN15 PE=1 SV=1	TSPAN15	1	0.000671673	121.9	NIMDFVQK(1)K	2	-0.46164	1	0.453	0.46	0.442	1.365	1.376	1.384
Cellular Component	GO:0031224	4	intrinsic component of membrane	0.00218143	Q9NX63	173	1.607	Up	2.6912e-07	K	MICOS complex subunit MIC19 OS=Homo sapiens OX=9606 GN=CHCHD3 PE=1 SV=1	CHCHD3	1	0.000353452	107.06	AAEEVEAK(1)FK	3	0.05199	2	0.732	0.744	0.733	1.173	1.179	1.198
Cellular Component	GO:0031224	4	intrinsic component of membrane	0.00218143	Q9NX63	45	7.858	Up	1.602e-05	K	MICOS complex subunit MIC19 OS=Homo sapiens OX=9606 GN=CHCHD3 PE=1 SV=1	CHCHD3	1	3.73343e-07	132.5	ESSPSGSK(1)SQR	2	0.84753	1	0.18	0.184	0.227	1.612	1.552	1.48
Cellular Component	GO:0031224	4	intrinsic component of membrane	0.00218143	Q9NRS4	249	1.837	Up	2.0037e-05	K	Transmembrane protease serine 4 OS=Homo sapiens OX=9606 GN=TMPRSS4 PE=1 SV=2	TMPRSS4	1	0.00432063	74.173	K(1)HTDVFNWK	3	-0.09216	1	0.682	0.664	0.659	1.182	1.219	1.283
Cellular Component	GO:0031224	4	intrinsic component of membrane	0.00218143	P04843	187	2.143	Up	1.58621e-05	K	Dolichyl-diphosphooligosaccharide--protein glycosyltransferase subunit 1 OS=Homo sapiens OX=9606 GN=RPN1 PE=1 SV=1	RPN1	1	1.75673e-17	156.17	NVESYTK(1)LGNPTR	2	-0.077266	1	0.57	0.614	0.604	1.244	1.32	1.267
Cellular Component	GO:0031224	4	intrinsic component of membrane	0.00218143	P37059	252	1.662	Up	0.0022599	K	Estradiol 17-beta-dehydrogenase 2 OS=Homo sapiens OX=9606 GN=HSD17B2 PE=1 SV=1	HSD17B2	1	0.00141145	97.734	LELSK(1)WGIK	3	0.69419	2	0.719	0.755	0.681	1.184	1.062	1.336
Cellular Component	GO:0031224	4	intrinsic component of membrane	0.00218143	Q03135	57	1.523	Up	0.0012176	K	Caveolin-1 OS=Homo sapiens OX=9606 GN=CAV1 PE=1 SV=4	CAV1	1	0.00201216	67.997	DPK(1)HLNDDVVK	3	1.0261	1	0.694	0.781	0.816	1.145	1.139	1.206
Cellular Component	GO:0031224	4	intrinsic component of membrane	0.00218143	P04920	893	4.44	Up	4.2628e-05	K	Anion exchange protein 2 OS=Homo sapiens OX=9606 GN=SLC4A2 PE=1 SV=4	SLC4A2	1	2.23352e-06	112.42	SLAGQSGQGK(1)PR	2	-2.3535	1	0.287	0.375	0.323	1.476	1.415	1.482
Cellular Component	GO:0031224	4	intrinsic component of membrane	0.00218143	O75323	75	7.133	Up	3.9428e-07	K	Protein NipSnap homolog 2 OS=Homo sapiens OX=9606 GN=NIPSNAP2 PE=1 SV=1	NIPSNAP2	1	7.14122e-32	147.11	ETSNLYK(1)LQFHNVKPECLEAYNK	4	-0.2199	7	0.215	0.206	0.225	1.621	1.5	1.487
Cellular Component	GO:0031224	4	intrinsic component of membrane	0.00218143	P46977	440	1.518	Up	0.00032166	K	Dolichyl-diphosphooligosaccharide--protein glycosyltransferase subunit STT3A OS=Homo sapiens OX=9606 GN=STT3A PE=1 SV=2	STT3A	1	0.00938561	58.274	NLDISRPDK(1)K	3	-0.18069	1	0.801	0.738	0.761	1.186	1.102	1.203
Cellular Component	GO:0031224	4	intrinsic component of membrane	0.00218143	P08174	161	4.927	Up	1.8954e-06	K	Complement decay-accelerating factor OS=Homo sapiens OX=9606 GN=CD55 PE=1 SV=4	CD55	1	0.000511591	92.611	K(1)SCPNPGEIR	2	-0.92109	3	0.289	0.285	0.326	1.505	1.493	1.436
Cellular Component	GO:0031224	4	intrinsic component of membrane	0.00218143	Q07065	301	1.726	Up	0.0034984	K	Cytoskeleton-associated protein 4 OS=Homo sapiens OX=9606 GN=CKAP4 PE=1 SV=2	CKAP4	1	0.00142164	100.92	EIQTSAK(1)SR	2	-1.0848	1	0.759	0.586	0.755	1.211	1.151	1.262
Cellular Component	GO:0031224	4	intrinsic component of membrane	0.00218143	P18564	548	1.991	Up	0.0032991	K	Integrin beta-6 OS=Homo sapiens OX=9606 GN=ITGB6 PE=1 SV=2	ITGB6	1	9.92231e-07	77.037	HK(1)GLLCGGNGDCDCGECVCR	3	-0.47256	1	0.5	0.688	0.699	1.2	1.299	1.258
Cellular Component	GO:0031224	4	intrinsic component of membrane	0.00218143	P04844	442	1.522	Up	0.0020441	K	Dolichyl-diphosphooligosaccharide--protein glycosyltransferase subunit 2 OS=Homo sapiens OX=9606 GN=RPN2 PE=1 SV=3	RPN2	1	9.65183e-11	115.57	LHNQK(1)TGQEVVFVAEPDNK	3	-0.45133	1	0.74	0.848	0.707	1.198	1.112	1.182
Cellular Component	GO:0031224	4	intrinsic component of membrane	0.00218143	P04844	311	1.701	Up	0.00068179	K	Dolichyl-diphosphooligosaccharide--protein glycosyltransferase subunit 2 OS=Homo sapiens OX=9606 GN=RPN2 PE=1 SV=3	RPN2	1	3.52812e-05	124.06	LEHAK(1)SVASR	2	-0.83563	2	0.647	0.769	0.706	1.219	1.246	1.144
Cellular Component	GO:0031224	4	intrinsic component of membrane	0.00218143	Q8TCJ2	688	1.573	Up	0.00030171	K	Dolichyl-diphosphooligosaccharide--protein glycosyltransferase subunit STT3B OS=Homo sapiens OX=9606 GN=STT3B PE=1 SV=1	STT3B	1	0.000563873	81.625	IAEGEHPK(1)DIR	3	1.1943	1	0.753	0.725	0.767	1.259	1.124	1.148
Cellular Component	GO:0031224	4	intrinsic component of membrane	0.00218143	Q8TCJ2	784	1.902	Up	1.014e-06	K	Dolichyl-diphosphooligosaccharide--protein glycosyltransferase subunit STT3B OS=Homo sapiens OX=9606 GN=STT3B PE=1 SV=1	STT3B	1	0.00186854	91.853	ETLDHK(1)PR	2	2.0478	2	0.65	0.638	0.668	1.235	1.226	1.259
Cellular Component	GO:0031224	4	intrinsic component of membrane	0.00218143	Q16891	102	2.142	Up	0.000164333	K	MICOS complex subunit MIC60 OS=Homo sapiens OX=9606 GN=IMMT PE=1 SV=1	IMMT	1	0.00406596	74.841	K(1)SIQSGPLK	3	0.37176	2	0.589	0.646	0.554	1.229	1.365	1.238
Cellular Component	GO:0031224	4	intrinsic component of membrane	0.00218143	P42167	393	1.546	Up	0.0051008	K	Lamina-associated polypeptide 2, isoforms beta/gamma OS=Homo sapiens OX=9606 GN=TMPO PE=1 SV=2	TMPO	1	0.000802858	73.435	YVPK(1)YVPLADVK	3	0.8665	1	0.732	0.692	0.843	1.067	1.277	1.16
Cellular Component	GO:0031224	4	intrinsic component of membrane	0.00218143	Q9BRQ6	114	2.999	Up	0.00020123	K	MICOS complex subunit MIC25 OS=Homo sapiens OX=9606 GN=CHCHD6 PE=1 SV=1	CHCHD6	1	0.00655234	74.301	EAATK(1)HSK	3	1.3693	1	0.495	0.401	0.479	1.488	1.397	1.239
Cellular Component	GO:0031224	4	intrinsic component of membrane	0.00218143	Q6NUK1	96	1.729	Up	0.00116274	K	Calcium-binding mitochondrial carrier protein SCaMC-1 OS=Homo sapiens OX=9606 GN=SLC25A24 PE=1 SV=2	SLC25A24	1	0.00529129	96.342	LAFK(1)SLDK	2	-0.90721	1	0.651	0.711	0.733	1.219	1.087	1.316
Cellular Component	GO:0031224	4	intrinsic component of membrane	0.00218143	Q8NGZ5	301	1.976	Up	3.3313e-06	K	Olfactory receptor 2G2 OS=Homo sapiens OX=9606 GN=OR2G2 PE=3 SV=1	OR2G2	1	0.0393046	75.738	EVK(1)GALK	2	-0.3398	1	0.658	0.629	0.616	1.28	1.24	1.24
Cellular Component	GO:0044420	5	extracellular matrix component	0.02421	P23229	144	3.768	Up	1.57151e-05	K	Integrin alpha-6 OS=Homo sapiens OX=9606 GN=ITGA6 PE=1 SV=5	ITGA6	1	3.1719e-06	130.01	QHVNTK(1)QESR	2	1.0391	2	0.354	0.398	0.382	1.474	1.325	1.474
Cellular Component	GO:0044420	5	extracellular matrix component	0.02421	P23229	594	2.852	Up	0.0097615	K	Integrin alpha-6 OS=Homo sapiens OX=9606 GN=ITGA6 PE=1 SV=5	ITGA6	1	0.0014851	102.53	YTQELTLK(1)R	2	0.55207	2	0.382	0.524	0.521	1.331	1.345	1.394
Cellular Component	GO:0044420	5	extracellular matrix component	0.02421	P24043	3092	1.918	Up	1.50302e-05	K	Laminin subunit alpha-2 OS=Homo sapiens OX=9606 GN=LAMA2 PE=1 SV=4	LAMA2	1	0.0350388	67.385	GCIRSLK(1)LTK	2	3.4243	1	0.661	0.626	0.658	1.283	1.221	1.227
Cellular Component	GO:0044420	5	extracellular matrix component	0.02421	Q16787	2135	1.622	Up	3.461e-06	K	Laminin subunit alpha-3 OS=Homo sapiens OX=9606 GN=LAMA3 PE=1 SV=2	LAMA3	1	0.000133898	89.507	SAGK(1)TSLVEEAEK	2	-0.15811	2	0.721	0.727	0.746	1.166	1.178	1.214
Cellular Component	GO:0044420	5	extracellular matrix component	0.02421	P02458	1444	3.469	Up	1.93387e-05	K	Collagen alpha-1(II) chain OS=Homo sapiens OX=9606 GN=COL2A1 PE=1 SV=3	COL2A1	1	0.014601	68.915	HTGK(1)WGK	3	-0.79413	1	0.434	0.395	0.388	1.483	1.302	1.437
Cellular Component	GO:0043679	7	axon terminus	0.168926	P17174	97	1.571	Up	0.0062823	K	Aspartate aminotransferase, cytoplasmic OS=Homo sapiens OX=9606 GN=GOT1 PE=1 SV=3	GOT1	1	0.000526115	69.03	LALGDDSPALK(1)EK	3	4.0464	1	0.768	0.717	0.76	1.092	1.374	1.06
Cellular Component	GO:0043679	7	axon terminus	0.168926	Q7L576	1188	1.882	Up	5.6212e-05	K	Cytoplasmic FMR1-interacting protein 1 OS=Homo sapiens OX=9606 GN=CYFIP1 PE=1 SV=1	CYFIP1	0.999952	0.000231257	89.231	VQK(1)HDGKDEIIK	4	-1.3205	2	0.634	0.688	0.65	1.296	1.192	1.224
Cellular Component	GO:0043679	7	axon terminus	0.168926	P17301	261	4.97	Up	7.7205e-05	K	Integrin alpha-2 OS=Homo sapiens OX=9606 GN=ITGA2 PE=1 SV=1	ITGA2	1	5.75495e-08	138.89	K(1)YAYSAASGGR	2	-0.52946	1	0.253	0.307	0.334	1.631	1.406	1.406
Cellular Component	GO:0030139	9	endocytic vesicle	0.100714	Q9NRD5	88	2.812	Up	3.5799e-06	K	PRKCA-binding protein OS=Homo sapiens OX=9606 GN=PICK1 PE=1 SV=2	PICK1	1	0.0229749	55.261	VEVAK(1)MIQEVK	2	0.85616	1	0.484	0.504	0.458	1.401	1.307	1.358
Cellular Component	GO:0030139	9	endocytic vesicle	0.100714	Q4VCS5	585	2.51	Up	9.7814e-08	K	Angiomotin OS=Homo sapiens OX=9606 GN=AMOT PE=1 SV=1	AMOT	1	0.0447623	40.941	DQALSNAQAK(1)VVK	2	0.43599	1	0.537	0.526	0.519	1.311	1.317	1.343
Cellular Component	GO:0030139	9	endocytic vesicle	0.100714	P14625	467	2.375	Up	0.00132479	K	Endoplasmin OS=Homo sapiens OX=9606 GN=HSP90B1 PE=1 SV=1	HSP90B1	1	0.0260932	82.287	K(1)TLDMIK	2	-1.9897	1	0.517	0.571	0.564	1.316	1.312	1.296
Cellular Component	GO:0030139	9	endocytic vesicle	0.100714	P14625	473	1.531	Up	0.0021359	K	Endoplasmin OS=Homo sapiens OX=9606 GN=HSP90B1 PE=1 SV=1	HSP90B1	1	0.0291692	80.438	TLDMIK(1)K	3	-0.98878	2	0.833	0.741	0.715	1.239	1.084	1.181
Cellular Component	GO:0030139	9	endocytic vesicle	0.100714	P30101	494	1.633	Up	0.00061616	K	Protein disulfide-isomerase A3 OS=Homo sapiens OX=9606 GN=PDIA3 PE=1 SV=4	PDIA3	1	1.11552e-22	158.91	EATNPPVIQEEK(1)PK	2	-0.21724	3	0.713	0.703	0.767	1.119	1.287	1.158
Cellular Component	GO:0030139	9	endocytic vesicle	0.100714	Q13557	268	2.448	Up	0.00064196	K	Calcium/calmodulin-dependent protein kinase type II subunit delta OS=Homo sapiens OX=9606 GN=CAMK2D PE=1 SV=3	CAMK2D	1	9.73432e-06	94.09	ITASEALK(1)HPWICQR	3	-2.1026	1	0.448	0.594	0.572	1.394	1.259	1.298
Cellular Component	GO:0030139	9	endocytic vesicle	0.100714	Q92598	135	1.659	Up	0.00020381	K	Heat shock protein 105 kDa OS=Homo sapiens OX=9606 GN=HSPH1 PE=1 SV=1	HSPH1	1	1.99598e-06	72.585	K(1)PVTDCVISVPSFFTDAER	3	0.53078	1	0.698	0.742	0.722	1.273	1.184	1.129
Cellular Component	GO:0030139	9	endocytic vesicle	0.100714	Q9Y4L1	991	1.814	Up	0.00105528	K	Hypoxia up-regulated protein 1 OS=Homo sapiens OX=9606 GN=HYOU1 PE=1 SV=1	HYOU1	1	0.0356549	68.657	EQSTGQK(1)R	2	-0.21595	1	0.705	0.586	0.734	1.194	1.25	1.23
Cellular Component	GO:0030139	9	endocytic vesicle	0.100714	Q9Y4L1	537	1.679	Up	0.00189553	K	Hypoxia up-regulated protein 1 OS=Homo sapiens OX=9606 GN=HYOU1 PE=1 SV=1	HYOU1	1	2.35366e-05	105.65	KYPDYESK(1)GIK	3	1.7955	1	0.728	0.644	0.773	1.297	1.201	1.103
Cellular Component	GO:0030139	9	endocytic vesicle	0.100714	Q03135	57	1.523	Up	0.0012176	K	Caveolin-1 OS=Homo sapiens OX=9606 GN=CAV1 PE=1 SV=4	CAV1	1	0.00201216	67.997	DPK(1)HLNDDVVK	3	1.0261	1	0.694	0.781	0.816	1.145	1.139	1.206
Cellular Component	GO:0042470	10	melanosome	0.08444	P08195	266	1.608	Up	0.00037925	K	4F2 cell-surface antigen heavy chain OS=Homo sapiens OX=9606 GN=SLC3A2 PE=1 SV=3	SLC3A2	1	3.45387e-05	99.788	GLVLGPIHK(1)NQK	3	-0.25361	1	0.772	0.719	0.718	1.155	1.268	1.129
Cellular Component	GO:0042470	10	melanosome	0.08444	P04843	187	2.143	Up	1.58621e-05	K	Dolichyl-diphosphooligosaccharide--protein glycosyltransferase subunit 1 OS=Homo sapiens OX=9606 GN=RPN1 PE=1 SV=1	RPN1	1	1.75673e-17	156.17	NVESYTK(1)LGNPTR	2	-0.077266	1	0.57	0.614	0.604	1.244	1.32	1.267
Cellular Component	GO:0042470	10	melanosome	0.08444	P14625	467	2.375	Up	0.00132479	K	Endoplasmin OS=Homo sapiens OX=9606 GN=HSP90B1 PE=1 SV=1	HSP90B1	1	0.0260932	82.287	K(1)TLDMIK	2	-1.9897	1	0.517	0.571	0.564	1.316	1.312	1.296
Cellular Component	GO:0042470	10	melanosome	0.08444	P14625	473	1.531	Up	0.0021359	K	Endoplasmin OS=Homo sapiens OX=9606 GN=HSP90B1 PE=1 SV=1	HSP90B1	1	0.0291692	80.438	TLDMIK(1)K	3	-0.98878	2	0.833	0.741	0.715	1.239	1.084	1.181
Cellular Component	GO:0042470	10	melanosome	0.08444	Q15084	368	1.539	Up	1.70414e-05	K	Protein disulfide-isomerase A6 OS=Homo sapiens OX=9606 GN=PDIA6 PE=1 SV=1	PDIA6	1	0.0107878	97.798	MK(1)FALLK	2	-0.72228	1	0.752	0.78	0.746	1.188	1.148	1.169
Cellular Component	GO:0042470	10	melanosome	0.08444	P31946	70	1.526	Up	0.0008628	K	14-3-3 protein beta/alpha OS=Homo sapiens OX=9606 GN=YWHAB PE=1 SV=3	YWHAB	1	1.60397e-05	106.67	VISSIEQK(1)TER	3	-0.051644	2	0.777	0.814	0.701	1.201	1.131	1.165
Cellular Component	GO:0042470	10	melanosome	0.08444	P23284	215	2.768	Up	5.7981e-05	K	Peptidyl-prolyl cis-trans isomerase B OS=Homo sapiens OX=9606 GN=PPIB PE=1 SV=2	PPIB	0.999974	0.00810599	71.531	IEVEKPFAIAK(1)E	2	0.05953	1	0.53	0.45	0.485	1.419	1.275	1.361
Cellular Component	GO:0042470	10	melanosome	0.08444	P23284	186	1.623	Up	0.00046209	K	Peptidyl-prolyl cis-trans isomerase B OS=Homo sapiens OX=9606 GN=PPIB PE=1 SV=2	PPIB	1	0.00214624	76.326	VESTK(1)TDSR	2	1.0719	2	0.776	0.75	0.668	1.175	1.209	1.177
Cellular Component	GO:0042470	10	melanosome	0.08444	P23284	129	1.737	Up	2.1985e-06	K	Peptidyl-prolyl cis-trans isomerase B OS=Homo sapiens OX=9606 GN=PPIB PE=1 SV=2	PPIB	1	0.0113626	70.942	FPDENFK(1)LK	3	-0.38822	2	0.71	0.703	0.677	1.218	1.193	1.22
Cellular Component	GO:0042470	10	melanosome	0.08444	P27824	87	1.514	Up	0.00095527	K	Calnexin OS=Homo sapiens OX=9606 GN=CANX PE=1 SV=2	CANX	1	0.014782	46.88	GTLSGWILSK(1)AK	3	-0.67335	1	0.807	0.786	0.712	1.226	1.112	1.152
Cellular Component	GO:0042470	10	melanosome	0.08444	P30101	494	1.633	Up	0.00061616	K	Protein disulfide-isomerase A3 OS=Homo sapiens OX=9606 GN=PDIA3 PE=1 SV=4	PDIA3	1	1.11552e-22	158.91	EATNPPVIQEEK(1)PK	2	-0.21724	3	0.713	0.703	0.767	1.119	1.287	1.158
Cellular Component	GO:0042470	10	melanosome	0.08444	P11021	553	1.584	Up	0.00051646	K	Endoplasmic reticulum chaperone BiP OS=Homo sapiens OX=9606 GN=HSPA5 PE=1 SV=2	HSPA5	1	0.0198462	68.915	FAEEDK(1)K	3	0.25072	1	0.739	0.758	0.737	1.273	1.094	1.171
Cellular Component	GO:0042470	10	melanosome	0.08444	P11021	352	1.593	Up	7.6558e-05	K	Endoplasmic reticulum chaperone BiP OS=Homo sapiens OX=9606 GN=HSPA5 PE=1 SV=2	HSPA5	1	0.000769989	104.22	VLEDSDLK(1)K	3	2.7364	2	0.731	0.73	0.76	1.123	1.214	1.2
Cellular Component	GO:0005796	10	Golgi lumen	0.203449	P00740	446	2.291	Up	0.0032782	K	Coagulation factor IX OS=Homo sapiens OX=9606 GN=F9 PE=1 SV=2	F9	1	0.00440376	82.008	YGIYTK(1)VSR	2	-0.90947	1	0.619	0.527	0.554	1.289	1.3	1.305
Cellular Component	GO:0005796	10	Golgi lumen	0.203449	O75487	44	1.652	Up	4.6607e-06	K	Glypican-4 OS=Homo sapiens OX=9606 GN=GPC4 PE=1 SV=4	GPC4	1	1.65724e-10	118.72	GFNK(1)NDAPLHEINGDHLK	4	0.22408	2	0.727	0.708	0.733	1.228	1.179	1.174
Cellular Component	GO:0034663	10	endoplasmic reticulum chaperone complex	0.000424087	P14625	467	2.375	Up	0.00132479	K	Endoplasmin OS=Homo sapiens OX=9606 GN=HSP90B1 PE=1 SV=1	HSP90B1	1	0.0260932	82.287	K(1)TLDMIK	2	-1.9897	1	0.517	0.571	0.564	1.316	1.312	1.296
Cellular Component	GO:0034663	10	endoplasmic reticulum chaperone complex	0.000424087	P14625	473	1.531	Up	0.0021359	K	Endoplasmin OS=Homo sapiens OX=9606 GN=HSP90B1 PE=1 SV=1	HSP90B1	1	0.0291692	80.438	TLDMIK(1)K	3	-0.98878	2	0.833	0.741	0.715	1.239	1.084	1.181
Cellular Component	GO:0034663	10	endoplasmic reticulum chaperone complex	0.000424087	Q15084	368	1.539	Up	1.70414e-05	K	Protein disulfide-isomerase A6 OS=Homo sapiens OX=9606 GN=PDIA6 PE=1 SV=1	PDIA6	1	0.0107878	97.798	MK(1)FALLK	2	-0.72228	1	0.752	0.78	0.746	1.188	1.148	1.169
Cellular Component	GO:0034663	10	endoplasmic reticulum chaperone complex	0.000424087	P23284	215	2.768	Up	5.7981e-05	K	Peptidyl-prolyl cis-trans isomerase B OS=Homo sapiens OX=9606 GN=PPIB PE=1 SV=2	PPIB	0.999974	0.00810599	71.531	IEVEKPFAIAK(1)E	2	0.05953	1	0.53	0.45	0.485	1.419	1.275	1.361
Cellular Component	GO:0034663	10	endoplasmic reticulum chaperone complex	0.000424087	P23284	186	1.623	Up	0.00046209	K	Peptidyl-prolyl cis-trans isomerase B OS=Homo sapiens OX=9606 GN=PPIB PE=1 SV=2	PPIB	1	0.00214624	76.326	VESTK(1)TDSR	2	1.0719	2	0.776	0.75	0.668	1.175	1.209	1.177
Cellular Component	GO:0034663	10	endoplasmic reticulum chaperone complex	0.000424087	P23284	129	1.737	Up	2.1985e-06	K	Peptidyl-prolyl cis-trans isomerase B OS=Homo sapiens OX=9606 GN=PPIB PE=1 SV=2	PPIB	1	0.0113626	70.942	FPDENFK(1)LK	3	-0.38822	2	0.71	0.703	0.677	1.218	1.193	1.22
Cellular Component	GO:0034663	10	endoplasmic reticulum chaperone complex	0.000424087	Q9Y4L1	991	1.814	Up	0.00105528	K	Hypoxia up-regulated protein 1 OS=Homo sapiens OX=9606 GN=HYOU1 PE=1 SV=1	HYOU1	1	0.0356549	68.657	EQSTGQK(1)R	2	-0.21595	1	0.705	0.586	0.734	1.194	1.25	1.23
Cellular Component	GO:0034663	10	endoplasmic reticulum chaperone complex	0.000424087	Q9Y4L1	537	1.679	Up	0.00189553	K	Hypoxia up-regulated protein 1 OS=Homo sapiens OX=9606 GN=HYOU1 PE=1 SV=1	HYOU1	1	2.35366e-05	105.65	KYPDYESK(1)GIK	3	1.7955	1	0.728	0.644	0.773	1.297	1.201	1.103
Cellular Component	GO:0034663	10	endoplasmic reticulum chaperone complex	0.000424087	P11021	553	1.584	Up	0.00051646	K	Endoplasmic reticulum chaperone BiP OS=Homo sapiens OX=9606 GN=HSPA5 PE=1 SV=2	HSPA5	1	0.0198462	68.915	FAEEDK(1)K	3	0.25072	1	0.739	0.758	0.737	1.273	1.094	1.171
Cellular Component	GO:0034663	10	endoplasmic reticulum chaperone complex	0.000424087	P11021	352	1.593	Up	7.6558e-05	K	Endoplasmic reticulum chaperone BiP OS=Homo sapiens OX=9606 GN=HSPA5 PE=1 SV=2	HSPA5	1	0.000769989	104.22	VLEDSDLK(1)K	3	2.7364	2	0.731	0.73	0.76	1.123	1.214	1.2
Cellular Component	GO:0008250	11	oligosaccharyltransferase complex	0.00256509	P04843	187	2.143	Up	1.58621e-05	K	Dolichyl-diphosphooligosaccharide--protein glycosyltransferase subunit 1 OS=Homo sapiens OX=9606 GN=RPN1 PE=1 SV=1	RPN1	1	1.75673e-17	156.17	NVESYTK(1)LGNPTR	2	-0.077266	1	0.57	0.614	0.604	1.244	1.32	1.267
Cellular Component	GO:0008250	11	oligosaccharyltransferase complex	0.00256509	P04844	442	1.522	Up	0.0020441	K	Dolichyl-diphosphooligosaccharide--protein glycosyltransferase subunit 2 OS=Homo sapiens OX=9606 GN=RPN2 PE=1 SV=3	RPN2	1	9.65183e-11	115.57	LHNQK(1)TGQEVVFVAEPDNK	3	-0.45133	1	0.74	0.848	0.707	1.198	1.112	1.182
Cellular Component	GO:0008250	11	oligosaccharyltransferase complex	0.00256509	P04844	311	1.701	Up	0.00068179	K	Dolichyl-diphosphooligosaccharide--protein glycosyltransferase subunit 2 OS=Homo sapiens OX=9606 GN=RPN2 PE=1 SV=3	RPN2	1	3.52812e-05	124.06	LEHAK(1)SVASR	2	-0.83563	2	0.647	0.769	0.706	1.219	1.246	1.144
Cellular Component	GO:0008250	11	oligosaccharyltransferase complex	0.00256509	P46977	440	1.518	Up	0.00032166	K	Dolichyl-diphosphooligosaccharide--protein glycosyltransferase subunit STT3A OS=Homo sapiens OX=9606 GN=STT3A PE=1 SV=2	STT3A	1	0.00938561	58.274	NLDISRPDK(1)K	3	-0.18069	1	0.801	0.738	0.761	1.186	1.102	1.203
Cellular Component	GO:0008250	11	oligosaccharyltransferase complex	0.00256509	Q8TCJ2	688	1.573	Up	0.00030171	K	Dolichyl-diphosphooligosaccharide--protein glycosyltransferase subunit STT3B OS=Homo sapiens OX=9606 GN=STT3B PE=1 SV=1	STT3B	1	0.000563873	81.625	IAEGEHPK(1)DIR	3	1.1943	1	0.753	0.725	0.767	1.259	1.124	1.148
Cellular Component	GO:0008250	11	oligosaccharyltransferase complex	0.00256509	Q8TCJ2	784	1.902	Up	1.014e-06	K	Dolichyl-diphosphooligosaccharide--protein glycosyltransferase subunit STT3B OS=Homo sapiens OX=9606 GN=STT3B PE=1 SV=1	STT3B	1	0.00186854	91.853	ETLDHK(1)PR	2	2.0478	2	0.65	0.638	0.668	1.235	1.226	1.259
Cellular Component	GO:0031595	11	nuclear proteasome complex	0.203449	P62333	206	2.136	Up	0.00048094	K	26S proteasome regulatory subunit 10B OS=Homo sapiens OX=9606 GN=PSMC6 PE=1 SV=1	PSMC6	1	0.000150997	83.37	VVSSSIVDK(1)YIGESAR	3	-0.50553	1	0.626	0.649	0.518	1.227	1.325	1.278
Cellular Component	GO:0031595	11	nuclear proteasome complex	0.203449	P62333	322	1.784	Up	0.040963	K	26S proteasome regulatory subunit 10B OS=Homo sapiens OX=9606 GN=PSMC6 PE=1 SV=1	PSMC6	1	3.68076e-07	92.39	IHAGPITK(1)HGEIDYEAIVK	4	0.89264	1	0.667	0.664	0.727	1.374	1.471	0.826
Cellular Component	GO:0031595	11	nuclear proteasome complex	0.203449	P62195	330	2.306	Up	0.0105445	K	26S proteasome regulatory subunit 8 OS=Homo sapiens OX=9606 GN=PSMC5 PE=1 SV=1	PSMC5	1	0.006593	64.82	LDILK(1)IHSR	3	-0.7783	1	0.602	0.591	0.492	0.932	1.66	1.293
Cellular Component	GO:0045202	2	synapse	0.0232477	Q9UPX8	1174	1.904	Up	0.00047943	K	SH3 and multiple ankyrin repeat domains protein 2 OS=Homo sapiens OX=9606 GN=SHANK2 PE=1 SV=3	SHANK2	1	0.0255254	57.281	MK(1)PIIHK	3	-3.76	1	0.718	0.65	0.589	1.296	1.239	1.192
Cellular Component	GO:0045202	2	synapse	0.0232477	Q7L576	1188	1.882	Up	5.6212e-05	K	Cytoplasmic FMR1-interacting protein 1 OS=Homo sapiens OX=9606 GN=CYFIP1 PE=1 SV=1	CYFIP1	0.999952	0.000231257	89.231	VQK(1)HDGKDEIIK	4	-1.3205	2	0.634	0.688	0.65	1.296	1.192	1.224
Cellular Component	GO:0045202	2	synapse	0.0232477	Q9NRD5	88	2.812	Up	3.5799e-06	K	PRKCA-binding protein OS=Homo sapiens OX=9606 GN=PICK1 PE=1 SV=2	PICK1	1	0.0229749	55.261	VEVAK(1)MIQEVK	2	0.85616	1	0.484	0.504	0.458	1.401	1.307	1.358
Cellular Component	GO:0045202	2	synapse	0.0232477	Q13009	564	2.554	Up	2.264e-05	K	T-lymphoma invasion and metastasis-inducing protein 1 OS=Homo sapiens OX=9606 GN=TIAM1 PE=1 SV=2	TIAM1	1	0.00536023	86.794	LLK(1)SEIK	3	-0.69534	1	0.501	0.52	0.54	1.387	1.234	1.366
Cellular Component	GO:0045202	2	synapse	0.0232477	Q14247	161	1.788	Up	3.79e-05	K	Src substrate cortactin OS=Homo sapiens OX=9606 GN=CTTN PE=1 SV=2	CTTN	1	5.64477e-17	133.78	DYSSGFGGK(1)YGVQADR	2	0.1629	2	0.677	0.659	0.712	1.252	1.23	1.179
Cellular Component	GO:0045202	2	synapse	0.0232477	Q14247	198	1.588	Up	0.00024373	K	Src substrate cortactin OS=Homo sapiens OX=9606 GN=CTTN PE=1 SV=2	CTTN	1	6.55628e-07	113.24	GFGGK(1)YGIDK	3	-0.15514	2	0.734	0.77	0.724	1.251	1.119	1.169
Cellular Component	GO:0045202	2	synapse	0.0232477	P17301	261	4.97	Up	7.7205e-05	K	Integrin alpha-2 OS=Homo sapiens OX=9606 GN=ITGA2 PE=1 SV=1	ITGA2	1	5.75495e-08	138.89	K(1)YAYSAASGGR	2	-0.52946	1	0.253	0.307	0.334	1.631	1.406	1.406
Cellular Component	GO:0045202	2	synapse	0.0232477	Q9NXR1	79	2.652	Up	1.5218e-06	K	Nuclear distribution protein nudE homolog 1 OS=Homo sapiens OX=9606 GN=NDE1 PE=1 SV=3	NDE1	1	0.0414988	56.404	MELETIK(1)EK	2	-1.519	1	0.499	0.53	0.486	1.352	1.333	1.333
Cellular Component	GO:0045202	2	synapse	0.0232477	P17174	97	1.571	Up	0.0062823	K	Aspartate aminotransferase, cytoplasmic OS=Homo sapiens OX=9606 GN=GOT1 PE=1 SV=3	GOT1	1	0.000526115	69.03	LALGDDSPALK(1)EK	3	4.0464	1	0.768	0.717	0.76	1.092	1.374	1.06
Cellular Component	GO:0045202	2	synapse	0.0232477	P23528	92	1.643	Up	3.7006e-05	K	Cofilin-1 OS=Homo sapiens OX=9606 GN=CFL1 PE=1 SV=3	CFL1	1	1.70741e-10	121.99	YALYDATYETK(1)ESK	2	0.88008	2	0.714	0.743	0.716	1.144	1.227	1.2
Cellular Component	GO:0045202	2	synapse	0.0232477	P35580	1782	1.618	Up	0.00133836	K	Myosin-10 OS=Homo sapiens OX=9606 GN=MYH10 PE=1 SV=3	MYH10	1	0.000848405	90.614	SAAQK(1)SDNAR	2	-0.18483	1	0.811	0.675	0.713	1.145	1.249	1.164
Cellular Component	GO:0045202	2	synapse	0.0232477	P21796	61	1.877	Up	2.673e-06	K	Voltage-dependent anion-selective channel protein 1 OS=Homo sapiens OX=9606 GN=VDAC1 PE=1 SV=2	VDAC1	1	0.00011548	117.25	VTGSLETK(1)YR	3	1.0352	3	0.663	0.636	0.677	1.244	1.244	1.221
Cellular Component	GO:0045202	2	synapse	0.0232477	P21796	20	1.506	Up	6.0692e-05	K	Voltage-dependent anion-selective channel protein 1 OS=Homo sapiens OX=9606 GN=VDAC1 PE=1 SV=2	VDAC1	1	5.63016e-11	131.66	DVFTK(1)GYGFGLIK	2	0.76596	2	0.765	0.794	0.754	1.198	1.157	1.128
Cellular Component	GO:0045202	2	synapse	0.0232477	P62195	330	2.306	Up	0.0105445	K	26S proteasome regulatory subunit 8 OS=Homo sapiens OX=9606 GN=PSMC5 PE=1 SV=1	PSMC5	1	0.006593	64.82	LDILK(1)IHSR	3	-0.7783	1	0.602	0.591	0.492	0.932	1.66	1.293
Cellular Component	GO:0045202	2	synapse	0.0232477	Q15063	676	1.528	Up	0.00066247	K	Periostin OS=Homo sapiens OX=9606 GN=POSTN PE=1 SV=2	POSTN	1	0.00277252	88.596	IITK(1)VVEPK	2	-0.2033	1	0.802	0.784	0.702	1.127	1.19	1.178
Cellular Component	GO:0045202	2	synapse	0.0232477	Q4V328	230	1.993	Up	2.4653e-05	K	GRIP1-associated protein 1 OS=Homo sapiens OX=9606 GN=GRIPAP1 PE=1 SV=2	GRIPAP1	1	0.00135038	86.772	LQEELAK(1)LSEK	3	-0.18655	2	0.659	0.631	0.6	1.287	1.212	1.268
Cellular Component	GO:0045202	2	synapse	0.0232477	P27824	87	1.514	Up	0.00095527	K	Calnexin OS=Homo sapiens OX=9606 GN=CANX PE=1 SV=2	CANX	1	0.014782	46.88	GTLSGWILSK(1)AK	3	-0.67335	1	0.807	0.786	0.712	1.226	1.112	1.152
Cellular Component	GO:0045202	2	synapse	0.0232477	P24043	3092	1.918	Up	1.50302e-05	K	Laminin subunit alpha-2 OS=Homo sapiens OX=9606 GN=LAMA2 PE=1 SV=4	LAMA2	1	0.0350388	67.385	GCIRSLK(1)LTK	2	3.4243	1	0.661	0.626	0.658	1.283	1.221	1.227
Cellular Component	GO:0032592	14	integral component of mitochondrial membrane	0.138441	Q9NX63	173	1.607	Up	2.6912e-07	K	MICOS complex subunit MIC19 OS=Homo sapiens OX=9606 GN=CHCHD3 PE=1 SV=1	CHCHD3	1	0.000353452	107.06	AAEEVEAK(1)FK	3	0.05199	2	0.732	0.744	0.733	1.173	1.179	1.198
Cellular Component	GO:0032592	14	integral component of mitochondrial membrane	0.138441	Q9NX63	45	7.858	Up	1.602e-05	K	MICOS complex subunit MIC19 OS=Homo sapiens OX=9606 GN=CHCHD3 PE=1 SV=1	CHCHD3	1	3.73343e-07	132.5	ESSPSGSK(1)SQR	2	0.84753	1	0.18	0.184	0.227	1.612	1.552	1.48
Cellular Component	GO:0032592	14	integral component of mitochondrial membrane	0.138441	Q16891	102	2.142	Up	0.000164333	K	MICOS complex subunit MIC60 OS=Homo sapiens OX=9606 GN=IMMT PE=1 SV=1	IMMT	1	0.00406596	74.841	K(1)SIQSGPLK	3	0.37176	2	0.589	0.646	0.554	1.229	1.365	1.238
Cellular Component	GO:0032592	14	integral component of mitochondrial membrane	0.138441	Q9BRQ6	114	2.999	Up	0.00020123	K	MICOS complex subunit MIC25 OS=Homo sapiens OX=9606 GN=CHCHD6 PE=1 SV=1	CHCHD6	1	0.00655234	74.301	EAATK(1)HSK	3	1.3693	1	0.495	0.401	0.479	1.488	1.397	1.239
Cellular Component	GO:0031091	11	platelet alpha granule	0.0469864	P15692	149	1.52	Up	0.0183197	K	Vascular endothelial growth factor A OS=Homo sapiens OX=9606 GN=VEGFA PE=1 SV=2	VEGFA	1	0.0158118	68.016	GK(1)GK(1)GQK(1)R	3	0.20842	1	0.619	0.836	0.835	1.054	1.197	1.23
Cellular Component	GO:0031091	11	platelet alpha granule	0.0469864	P15692	147	1.52	Up	0.0183197	K	Vascular endothelial growth factor A OS=Homo sapiens OX=9606 GN=VEGFA PE=1 SV=2	VEGFA	1	0.0158118	68.016	GK(1)GK(1)GQK(1)R	3	0.20842	1	0.619	0.836	0.835	1.054	1.197	1.23
Cellular Component	GO:0031091	11	platelet alpha granule	0.0469864	P15692	152	1.52	Up	0.0183197	K	Vascular endothelial growth factor A OS=Homo sapiens OX=9606 GN=VEGFA PE=1 SV=2	VEGFA	1	0.0158118	68.016	GK(1)GK(1)GQK(1)R	3	0.20842	1	0.619	0.836	0.835	1.054	1.197	1.23
Cellular Component	GO:0031091	11	platelet alpha granule	0.0469864	P04075	200	1.909	Up	0.00039957	K	Fructose-bisphosphate aldolase A OS=Homo sapiens OX=9606 GN=ALDOA PE=1 SV=2	ALDOA	1	1.06057e-28	125	YASICQQNGIVPIVEPEILPDGDHDLK(1)R	3	-1.6772	8	0.693	0.577	0.681	1.214	1.249	1.262
Cellular Component	GO:0031091	11	platelet alpha granule	0.0469864	P04075	108	1.531	Up	0.00098334	K	Fructose-bisphosphate aldolase A OS=Homo sapiens OX=9606 GN=ALDOA PE=1 SV=2	ALDOA	1	0.000445929	92.866	GGVVGIK(1)VDK	2	0.15856	1	0.727	0.722	0.837	1.193	1.157	1.149
Cellular Component	GO:0031091	11	platelet alpha granule	0.0469864	P02765	225	2.633	Up	1.9636e-06	K	Alpha-2-HS-glycoprotein OS=Homo sapiens OX=9606 GN=AHSG PE=1 SV=2	AHSG	1	1.71027e-17	156.24	CNLLAEK(1)QYGFCK	3	-0.271	5	0.509	0.493	0.523	1.376	1.357	1.282
Cellular Component	GO:0031091	11	platelet alpha granule	0.0469864	O43707	779	1.506	Up	4.621e-06	K	Alpha-actinin-4 OS=Homo sapiens OX=9606 GN=ACTN4 PE=1 SV=2	ACTN4	1	2.1119e-07	92.098	ASFNHFDK(1)DHGGALGPEEFK	4	-0.48137	1	0.769	0.755	0.788	1.156	1.148	1.177
Cellular Component	GO:0022627	11	cytosolic small ribosomal subunit	0.14518	P62753	243	1.631	Up	0.000121433	K	40S ribosomal protein S6 OS=Homo sapiens OX=9606 GN=RPS6 PE=1 SV=1	RPS6	1	1.94239e-06	121.29	ASTSK(1)SESSQK	2	0.72863	2	0.736	0.685	0.766	1.194	1.197	1.175
Cellular Component	GO:0022627	11	cytosolic small ribosomal subunit	0.14518	P62249	26	1.879	Up	0.0027232	K	40S ribosomal protein S16 OS=Homo sapiens OX=9606 GN=RPS16 PE=1 SV=2	RPS16	1	0.0195879	51.762	TATAVAHCK(1)R	3	-0.38563	1	0.581	0.604	0.786	1.233	1.194	1.277
Cellular Component	GO:0022627	11	cytosolic small ribosomal subunit	0.14518	P62277	34	1.54	Up	5.7354e-05	K	40S ribosomal protein S13 OS=Homo sapiens OX=9606 GN=RPS13 PE=1 SV=2	RPS13	1	4.38739e-08	131.35	LTSDDVK(1)EQIYK	2	0.23715	1	0.761	0.744	0.773	1.215	1.163	1.13
Cellular Component	GO:0022627	11	cytosolic small ribosomal subunit	0.14518	P62269	137	1.73	Up	2.4191e-06	K	40S ribosomal protein S18 OS=Homo sapiens OX=9606 GN=RPS18 PE=1 SV=3	RPS18	1	0.00404982	83.438	GQHTK(1)TTGR	2	0.13381	2	0.682	0.709	0.705	1.22	1.182	1.224
Cellular Component	GO:0022627	11	cytosolic small ribosomal subunit	0.14518	P15880	275	3.946	Up	0.020878	K	40S ribosomal protein S2 OS=Homo sapiens OX=9606 GN=RPS2 PE=1 SV=2	RPS2	1	0.00013314	66.289	SPYQEFTDHLVK(1)THTR	4	-0.31731	1		0.19	0.445	1.296	1.113	1.35
Cellular Component	GO:0022627	11	cytosolic small ribosomal subunit	0.14518	P62263	106	4.268	Up	8.5519e-07	K	40S ribosomal protein S14 OS=Homo sapiens OX=9606 GN=RPS14 PE=1 SV=3	RPS14	1	0.000851749	84.173	TK(1)TPGPGAQSALR	2	-2.5539	1	0.322	0.351	0.346	1.465	1.393	1.491
Cellular Component	GO:0022627	11	cytosolic small ribosomal subunit	0.14518	P62263	96	1.537	Up	0.0272	K	40S ribosomal protein S14 OS=Homo sapiens OX=9606 GN=RPS14 PE=1 SV=3	RPS14	1	7.38528e-07	110.08	ELGITALHIK(1)LR	3	0.52572	2	0.692	0.795	0.788	0.974	1.432	1.09
Cellular Component	GO:0045178	4	basal part of cell	0.113715	P23229	144	3.768	Up	1.57151e-05	K	Integrin alpha-6 OS=Homo sapiens OX=9606 GN=ITGA6 PE=1 SV=5	ITGA6	1	3.1719e-06	130.01	QHVNTK(1)QESR	2	1.0391	2	0.354	0.398	0.382	1.474	1.325	1.474
Cellular Component	GO:0045178	4	basal part of cell	0.113715	P23229	594	2.852	Up	0.0097615	K	Integrin alpha-6 OS=Homo sapiens OX=9606 GN=ITGA6 PE=1 SV=5	ITGA6	1	0.0014851	102.53	YTQELTLK(1)R	2	0.55207	2	0.382	0.524	0.521	1.331	1.345	1.394
Cellular Component	GO:0045178	4	basal part of cell	0.113715	P17301	261	4.97	Up	7.7205e-05	K	Integrin alpha-2 OS=Homo sapiens OX=9606 GN=ITGA2 PE=1 SV=1	ITGA2	1	5.75495e-08	138.89	K(1)YAYSAASGGR	2	-0.52946	1	0.253	0.307	0.334	1.631	1.406	1.406
Cellular Component	GO:0051233	11	spindle midzone	0.203449	O00423	83	2.138	Up	3.0697e-06	K	Echinoderm microtubule-associated protein-like 1 OS=Homo sapiens OX=9606 GN=EML1 PE=1 SV=3	EML1	1	0.00127687	54.898	GPTK(1)ARPLMQTLPLR	3	3.2905	1	0.583	0.587	0.621	1.249	1.309	1.272
Cellular Component	GO:0051233	11	spindle midzone	0.203449	Q14247	161	1.788	Up	3.79e-05	K	Src substrate cortactin OS=Homo sapiens OX=9606 GN=CTTN PE=1 SV=2	CTTN	1	5.64477e-17	133.78	DYSSGFGGK(1)YGVQADR	2	0.1629	2	0.677	0.659	0.712	1.252	1.23	1.179
Cellular Component	GO:0051233	11	spindle midzone	0.203449	Q14247	198	1.588	Up	0.00024373	K	Src substrate cortactin OS=Homo sapiens OX=9606 GN=CTTN PE=1 SV=2	CTTN	1	6.55628e-07	113.24	GFGGK(1)YGIDK	3	-0.15514	2	0.734	0.77	0.724	1.251	1.119	1.169
Cellular Component	GO:0005887	8	integral component of plasma membrane	0.0239009	P35232	202	1.61	Up	6.4106e-05	K	Prohibitin OS=Homo sapiens OX=9606 GN=PHB PE=1 SV=1	PHB	1	8.49153e-05	104.22	FVVEK(1)AEQQK	3	1.0761	1	0.727	0.772	0.707	1.186	1.162	1.203
Cellular Component	GO:0005887	8	integral component of plasma membrane	0.0239009	P18564	548	1.991	Up	0.0032991	K	Integrin beta-6 OS=Homo sapiens OX=9606 GN=ITGB6 PE=1 SV=2	ITGB6	1	9.92231e-07	77.037	HK(1)GLLCGGNGDCDCGECVCR	3	-0.47256	1	0.5	0.688	0.699	1.2	1.299	1.258
Cellular Component	GO:0005887	8	integral component of plasma membrane	0.0239009	P23229	144	3.768	Up	1.57151e-05	K	Integrin alpha-6 OS=Homo sapiens OX=9606 GN=ITGA6 PE=1 SV=5	ITGA6	1	3.1719e-06	130.01	QHVNTK(1)QESR	2	1.0391	2	0.354	0.398	0.382	1.474	1.325	1.474
Cellular Component	GO:0005887	8	integral component of plasma membrane	0.0239009	P23229	594	2.852	Up	0.0097615	K	Integrin alpha-6 OS=Homo sapiens OX=9606 GN=ITGA6 PE=1 SV=5	ITGA6	1	0.0014851	102.53	YTQELTLK(1)R	2	0.55207	2	0.382	0.524	0.521	1.331	1.345	1.394
Cellular Component	GO:0005887	8	integral component of plasma membrane	0.0239009	O75487	44	1.652	Up	4.6607e-06	K	Glypican-4 OS=Homo sapiens OX=9606 GN=GPC4 PE=1 SV=4	GPC4	1	1.65724e-10	118.72	GFNK(1)NDAPLHEINGDHLK	4	0.22408	2	0.727	0.708	0.733	1.228	1.179	1.174
Cellular Component	GO:0005887	8	integral component of plasma membrane	0.0239009	Q03135	57	1.523	Up	0.0012176	K	Caveolin-1 OS=Homo sapiens OX=9606 GN=CAV1 PE=1 SV=4	CAV1	1	0.00201216	67.997	DPK(1)HLNDDVVK	3	1.0261	1	0.694	0.781	0.816	1.145	1.139	1.206
Cellular Component	GO:0005887	8	integral component of plasma membrane	0.0239009	P04920	893	4.44	Up	4.2628e-05	K	Anion exchange protein 2 OS=Homo sapiens OX=9606 GN=SLC4A2 PE=1 SV=4	SLC4A2	1	2.23352e-06	112.42	SLAGQSGQGK(1)PR	2	-2.3535	1	0.287	0.375	0.323	1.476	1.415	1.482
Cellular Component	GO:0005887	8	integral component of plasma membrane	0.0239009	P16422	106	1.604	Up	9.7064e-05	K	Epithelial cell adhesion molecule OS=Homo sapiens OX=9606 GN=EPCAM PE=1 SV=2	EPCAM	1	1.06393e-16	97.771	AKPEGALQNNDGLYDPDCDESGLFK(1)AK	4	-0.73346	3	0.778	0.711	0.724	1.211	1.164	1.175
Cellular Component	GO:0005887	8	integral component of plasma membrane	0.0239009	P16422	160	10.663	Up	1.6533e-07	K	Epithelial cell adhesion molecule OS=Homo sapiens OX=9606 GN=EPCAM PE=1 SV=2	EPCAM	1	0.000107872	110.08	EKPYDSK(1)SLR	2	-0.057166	2	0.152	0.147	0.146	1.691	1.532	1.522
Cellular Component	GO:0005887	8	integral component of plasma membrane	0.0239009	O75323	75	7.133	Up	3.9428e-07	K	Protein NipSnap homolog 2 OS=Homo sapiens OX=9606 GN=NIPSNAP2 PE=1 SV=1	NIPSNAP2	1	7.14122e-32	147.11	ETSNLYK(1)LQFHNVKPECLEAYNK	4	-0.2199	7	0.215	0.206	0.225	1.621	1.5	1.487
Cellular Component	GO:0005887	8	integral component of plasma membrane	0.0239009	Q14247	161	1.788	Up	3.79e-05	K	Src substrate cortactin OS=Homo sapiens OX=9606 GN=CTTN PE=1 SV=2	CTTN	1	5.64477e-17	133.78	DYSSGFGGK(1)YGVQADR	2	0.1629	2	0.677	0.659	0.712	1.252	1.23	1.179
Cellular Component	GO:0005887	8	integral component of plasma membrane	0.0239009	Q14247	198	1.588	Up	0.00024373	K	Src substrate cortactin OS=Homo sapiens OX=9606 GN=CTTN PE=1 SV=2	CTTN	1	6.55628e-07	113.24	GFGGK(1)YGIDK	3	-0.15514	2	0.734	0.77	0.724	1.251	1.119	1.169
Cellular Component	GO:0005887	8	integral component of plasma membrane	0.0239009	P08174	161	4.927	Up	1.8954e-06	K	Complement decay-accelerating factor OS=Homo sapiens OX=9606 GN=CD55 PE=1 SV=4	CD55	1	0.000511591	92.611	K(1)SCPNPGEIR	2	-0.92109	3	0.289	0.285	0.326	1.505	1.493	1.436
Cellular Component	GO:0005887	8	integral component of plasma membrane	0.0239009	O95858	150	3.044	Up	4.4605e-08	K	Tetraspanin-15 OS=Homo sapiens OX=9606 GN=TSPAN15 PE=1 SV=1	TSPAN15	1	0.000671673	121.9	NIMDFVQK(1)K	2	-0.46164	1	0.453	0.46	0.442	1.365	1.376	1.384
Cellular Component	GO:0005887	8	integral component of plasma membrane	0.0239009	P17301	261	4.97	Up	7.7205e-05	K	Integrin alpha-2 OS=Homo sapiens OX=9606 GN=ITGA2 PE=1 SV=1	ITGA2	1	5.75495e-08	138.89	K(1)YAYSAASGGR	2	-0.52946	1	0.253	0.307	0.334	1.631	1.406	1.406
Cellular Component	GO:0005762	12	mitochondrial large ribosomal subunit	0.268941	P09001	235	2.005	Up	0.00074339	K	39S ribosomal protein L3, mitochondrial OS=Homo sapiens OX=9606 GN=MRPL3 PE=1 SV=1	MRPL3	1	7.32746e-11	124.42	GQPATHGQTK(1)THR	3	-0.88038	2	0.604	0.565	0.712	1.324	1.19	1.258
Cellular Component	GO:0005762	12	mitochondrial large ribosomal subunit	0.268941	Q9BYC8	117	5.343	Up	2.3078e-07	K	39S ribosomal protein L32, mitochondrial OS=Homo sapiens OX=9606 GN=MRPL32 PE=1 SV=1	MRPL32	1	0.000231659	73.722	NNIDVCPECGHLK(1)QK	3	-2.4227	1	0.27	0.294	0.273	1.468	1.495	1.509
Cellular Component	GO:0005762	12	mitochondrial large ribosomal subunit	0.268941	Q96DV4	148	2.049	Up	0.00029983	K	39S ribosomal protein L38, mitochondrial OS=Homo sapiens OX=9606 GN=MRPL38 PE=1 SV=2	MRPL38	1	0.00102008	84.083	TCGPYHK(1)QR	3	-0.20609	2	0.652	0.598	0.604	1.37	1.29	1.139
Cellular Component	GO:0043197	7	dendritic spine	0.00139009	Q9UPX8	1174	1.904	Up	0.00047943	K	SH3 and multiple ankyrin repeat domains protein 2 OS=Homo sapiens OX=9606 GN=SHANK2 PE=1 SV=3	SHANK2	1	0.0255254	57.281	MK(1)PIIHK	3	-3.76	1	0.718	0.65	0.589	1.296	1.239	1.192
Cellular Component	GO:0043197	7	dendritic spine	0.00139009	P27824	87	1.514	Up	0.00095527	K	Calnexin OS=Homo sapiens OX=9606 GN=CANX PE=1 SV=2	CANX	1	0.014782	46.88	GTLSGWILSK(1)AK	3	-0.67335	1	0.807	0.786	0.712	1.226	1.112	1.152
Cellular Component	GO:0043197	7	dendritic spine	0.00139009	P35580	1782	1.618	Up	0.00133836	K	Myosin-10 OS=Homo sapiens OX=9606 GN=MYH10 PE=1 SV=3	MYH10	1	0.000848405	90.614	SAAQK(1)SDNAR	2	-0.18483	1	0.811	0.675	0.713	1.145	1.249	1.164
Cellular Component	GO:0043197	7	dendritic spine	0.00139009	P23528	92	1.643	Up	3.7006e-05	K	Cofilin-1 OS=Homo sapiens OX=9606 GN=CFL1 PE=1 SV=3	CFL1	1	1.70741e-10	121.99	YALYDATYETK(1)ESK	2	0.88008	2	0.714	0.743	0.716	1.144	1.227	1.2
Cellular Component	GO:0043197	7	dendritic spine	0.00139009	Q13009	564	2.554	Up	2.264e-05	K	T-lymphoma invasion and metastasis-inducing protein 1 OS=Homo sapiens OX=9606 GN=TIAM1 PE=1 SV=2	TIAM1	1	0.00536023	86.794	LLK(1)SEIK	3	-0.69534	1	0.501	0.52	0.54	1.387	1.234	1.366
Cellular Component	GO:0043197	7	dendritic spine	0.00139009	Q7L576	1188	1.882	Up	5.6212e-05	K	Cytoplasmic FMR1-interacting protein 1 OS=Homo sapiens OX=9606 GN=CYFIP1 PE=1 SV=1	CYFIP1	0.999952	0.000231257	89.231	VQK(1)HDGKDEIIK	4	-1.3205	2	0.634	0.688	0.65	1.296	1.192	1.224
Cellular Component	GO:0043197	7	dendritic spine	0.00139009	P24043	3092	1.918	Up	1.50302e-05	K	Laminin subunit alpha-2 OS=Homo sapiens OX=9606 GN=LAMA2 PE=1 SV=4	LAMA2	1	0.0350388	67.385	GCIRSLK(1)LTK	2	3.4243	1	0.661	0.626	0.658	1.283	1.221	1.227
Cellular Component	GO:0043197	7	dendritic spine	0.00139009	Q14247	161	1.788	Up	3.79e-05	K	Src substrate cortactin OS=Homo sapiens OX=9606 GN=CTTN PE=1 SV=2	CTTN	1	5.64477e-17	133.78	DYSSGFGGK(1)YGVQADR	2	0.1629	2	0.677	0.659	0.712	1.252	1.23	1.179
Cellular Component	GO:0043197	7	dendritic spine	0.00139009	Q14247	198	1.588	Up	0.00024373	K	Src substrate cortactin OS=Homo sapiens OX=9606 GN=CTTN PE=1 SV=2	CTTN	1	6.55628e-07	113.24	GFGGK(1)YGIDK	3	-0.15514	2	0.734	0.77	0.724	1.251	1.119	1.169
Cellular Component	GO:0033017	11	sarcoplasmic reticulum membrane	0.113715	Q12797	336	1.771	Up	0.0099388	K	Aspartyl/asparaginyl beta-hydroxylase OS=Homo sapiens OX=9606 GN=ASPH PE=1 SV=3	ASPH	1	0.0197409	87.476	LLNK(1)FDK	2	2.2137	1	0.759	0.622	0.682	1.221	1.227	1.206
Cellular Component	GO:0033017	11	sarcoplasmic reticulum membrane	0.113715	Q13557	268	2.448	Up	0.00064196	K	Calcium/calmodulin-dependent protein kinase type II subunit delta OS=Homo sapiens OX=9606 GN=CAMK2D PE=1 SV=3	CAMK2D	1	9.73432e-06	94.09	ITASEALK(1)HPWICQR	3	-2.1026	1	0.448	0.594	0.572	1.394	1.259	1.298
Cellular Component	GO:0005925	6	focal adhesion	0.00184201	P18124	223	1.556	Up	0.00049647	K	60S ribosomal protein L7 OS=Homo sapiens OX=9606 GN=RPL7 PE=1 SV=1	RPL7	1	2.59475e-29	179.94	K(1)TTHFVEGGDAGNREDQINR	3	-0.098351	4	0.789	0.778	0.693	1.183	1.144	1.19
Cellular Component	GO:0005925	6	focal adhesion	0.00184201	P23229	144	3.768	Up	1.57151e-05	K	Integrin alpha-6 OS=Homo sapiens OX=9606 GN=ITGA6 PE=1 SV=5	ITGA6	1	3.1719e-06	130.01	QHVNTK(1)QESR	2	1.0391	2	0.354	0.398	0.382	1.474	1.325	1.474
Cellular Component	GO:0005925	6	focal adhesion	0.00184201	P23229	594	2.852	Up	0.0097615	K	Integrin alpha-6 OS=Homo sapiens OX=9606 GN=ITGA6 PE=1 SV=5	ITGA6	1	0.0014851	102.53	YTQELTLK(1)R	2	0.55207	2	0.382	0.524	0.521	1.331	1.345	1.394
Cellular Component	GO:0005925	6	focal adhesion	0.00184201	Q7L576	1188	1.882	Up	5.6212e-05	K	Cytoplasmic FMR1-interacting protein 1 OS=Homo sapiens OX=9606 GN=CYFIP1 PE=1 SV=1	CYFIP1	0.999952	0.000231257	89.231	VQK(1)HDGKDEIIK	4	-1.3205	2	0.634	0.688	0.65	1.296	1.192	1.224
Cellular Component	GO:0005925	6	focal adhesion	0.00184201	P15880	275	3.946	Up	0.020878	K	40S ribosomal protein S2 OS=Homo sapiens OX=9606 GN=RPS2 PE=1 SV=2	RPS2	1	0.00013314	66.289	SPYQEFTDHLVK(1)THTR	4	-0.31731	1		0.19	0.445	1.296	1.113	1.35
Cellular Component	GO:0005925	6	focal adhesion	0.00184201	Q03135	57	1.523	Up	0.0012176	K	Caveolin-1 OS=Homo sapiens OX=9606 GN=CAV1 PE=1 SV=4	CAV1	1	0.00201216	67.997	DPK(1)HLNDDVVK	3	1.0261	1	0.694	0.781	0.816	1.145	1.139	1.206
Cellular Component	GO:0005925	6	focal adhesion	0.00184201	P62263	106	4.268	Up	8.5519e-07	K	40S ribosomal protein S14 OS=Homo sapiens OX=9606 GN=RPS14 PE=1 SV=3	RPS14	1	0.000851749	84.173	TK(1)TPGPGAQSALR	2	-2.5539	1	0.322	0.351	0.346	1.465	1.393	1.491
Cellular Component	GO:0005925	6	focal adhesion	0.00184201	P62263	96	1.537	Up	0.0272	K	40S ribosomal protein S14 OS=Homo sapiens OX=9606 GN=RPS14 PE=1 SV=3	RPS14	1	7.38528e-07	110.08	ELGITALHIK(1)LR	3	0.52572	2	0.692	0.795	0.788	0.974	1.432	1.09
Cellular Component	GO:0005925	6	focal adhesion	0.00184201	P04920	893	4.44	Up	4.2628e-05	K	Anion exchange protein 2 OS=Homo sapiens OX=9606 GN=SLC4A2 PE=1 SV=4	SLC4A2	1	2.23352e-06	112.42	SLAGQSGQGK(1)PR	2	-2.3535	1	0.287	0.375	0.323	1.476	1.415	1.482
Cellular Component	GO:0005925	6	focal adhesion	0.00184201	P62917	46	1.894	Up	1.75293e-05	K	60S ribosomal protein L8 OS=Homo sapiens OX=9606 GN=RPL8 PE=1 SV=2	RPL8	1	0.000128202	96.464	GIVK(1)DIIHDPGR	2	-0.25301	2	0.668	0.643	0.653	1.287	1.189	1.244
Cellular Component	GO:0005925	6	focal adhesion	0.00184201	O43707	779	1.506	Up	4.621e-06	K	Alpha-actinin-4 OS=Homo sapiens OX=9606 GN=ACTN4 PE=1 SV=2	ACTN4	1	2.1119e-07	92.098	ASFNHFDK(1)DHGGALGPEEFK	4	-0.48137	1	0.769	0.755	0.788	1.156	1.148	1.177
Cellular Component	GO:0005925	6	focal adhesion	0.00184201	Q02878	192	1.535	Up	0.00026491	K	60S ribosomal protein L6 OS=Homo sapiens OX=9606 GN=RPL6 PE=1 SV=3	RPL6	1	0.000693341	75.589	THQK(1)FVIATSTK	3	-0.46954	1	0.74	0.814	0.728	1.184	1.162	1.156
Cellular Component	GO:0005925	6	focal adhesion	0.00184201	P46777	27	1.597	Up	0.00119775	K	60S ribosomal protein L5 OS=Homo sapiens OX=9606 GN=RPL5 PE=1 SV=3	RPL5	1	0.0161426	70.412	EGK(1)TDYYAR	2	-0.47447	2	0.68	0.764	0.777	1.268	1.167	1.111
Cellular Component	GO:0005925	6	focal adhesion	0.00184201	P30101	494	1.633	Up	0.00061616	K	Protein disulfide-isomerase A3 OS=Homo sapiens OX=9606 GN=PDIA3 PE=1 SV=4	PDIA3	1	1.11552e-22	158.91	EATNPPVIQEEK(1)PK	2	-0.21724	3	0.713	0.703	0.767	1.119	1.287	1.158
Cellular Component	GO:0005925	6	focal adhesion	0.00184201	P63261	50	2.044	Up	0.00151871	K	Actin, cytoplasmic 2 OS=Homo sapiens OX=9606 GN=ACTG1 PE=1 SV=1	ACTG1	1	1.73645e-08	74.364	HQGVMVGMGQK(1)DSYVGDEAQSK	3	-0.91047	1	0.53	0.605	0.719	1.328	1.267	1.194
Cellular Component	GO:0005925	6	focal adhesion	0.00184201	Q9Y4L1	991	1.814	Up	0.00105528	K	Hypoxia up-regulated protein 1 OS=Homo sapiens OX=9606 GN=HYOU1 PE=1 SV=1	HYOU1	1	0.0356549	68.657	EQSTGQK(1)R	2	-0.21595	1	0.705	0.586	0.734	1.194	1.25	1.23
Cellular Component	GO:0005925	6	focal adhesion	0.00184201	Q9Y4L1	537	1.679	Up	0.00189553	K	Hypoxia up-regulated protein 1 OS=Homo sapiens OX=9606 GN=HYOU1 PE=1 SV=1	HYOU1	1	2.35366e-05	105.65	KYPDYESK(1)GIK	3	1.7955	1	0.728	0.644	0.773	1.297	1.201	1.103
Cellular Component	GO:0005925	6	focal adhesion	0.00184201	Q14247	161	1.788	Up	3.79e-05	K	Src substrate cortactin OS=Homo sapiens OX=9606 GN=CTTN PE=1 SV=2	CTTN	1	5.64477e-17	133.78	DYSSGFGGK(1)YGVQADR	2	0.1629	2	0.677	0.659	0.712	1.252	1.23	1.179
Cellular Component	GO:0005925	6	focal adhesion	0.00184201	Q14247	198	1.588	Up	0.00024373	K	Src substrate cortactin OS=Homo sapiens OX=9606 GN=CTTN PE=1 SV=2	CTTN	1	6.55628e-07	113.24	GFGGK(1)YGIDK	3	-0.15514	2	0.734	0.77	0.724	1.251	1.119	1.169
Cellular Component	GO:0005925	6	focal adhesion	0.00184201	P17301	261	4.97	Up	7.7205e-05	K	Integrin alpha-2 OS=Homo sapiens OX=9606 GN=ITGA2 PE=1 SV=1	ITGA2	1	5.75495e-08	138.89	K(1)YAYSAASGGR	2	-0.52946	1	0.253	0.307	0.334	1.631	1.406	1.406
Cellular Component	GO:0005925	6	focal adhesion	0.00184201	P21333	994	1.525	Up	1.9772e-05	K	Filamin-A OS=Homo sapiens OX=9606 GN=FLNA PE=1 SV=4	FLNA	1	0.00346172	85.813	DQEFTVK(1)SK	3	-0.051795	2	0.786	0.743	0.763	1.155	1.183	1.157
Cellular Component	GO:0005925	6	focal adhesion	0.00184201	P18564	548	1.991	Up	0.0032991	K	Integrin beta-6 OS=Homo sapiens OX=9606 GN=ITGB6 PE=1 SV=2	ITGB6	1	9.92231e-07	77.037	HK(1)GLLCGGNGDCDCGECVCR	3	-0.47256	1	0.5	0.688	0.699	1.2	1.299	1.258
Cellular Component	GO:0005925	6	focal adhesion	0.00184201	P36507	108	1.663	Up	0.0022007	K	Dual specificity mitogen-activated protein kinase kinase 2 OS=Homo sapiens OX=9606 GN=MAP2K2 PE=1 SV=1	MAP2K2	1	4.9811e-05	95.483	LIHLEIK(1)PAIR	3	-0.84799	1	0.79	0.663	0.705	1.236	1.078	1.275
Cellular Component	GO:0005925	6	focal adhesion	0.00184201	P14625	467	2.375	Up	0.00132479	K	Endoplasmin OS=Homo sapiens OX=9606 GN=HSP90B1 PE=1 SV=1	HSP90B1	1	0.0260932	82.287	K(1)TLDMIK	2	-1.9897	1	0.517	0.571	0.564	1.316	1.312	1.296
Cellular Component	GO:0005925	6	focal adhesion	0.00184201	P14625	473	1.531	Up	0.0021359	K	Endoplasmin OS=Homo sapiens OX=9606 GN=HSP90B1 PE=1 SV=1	HSP90B1	1	0.0291692	80.438	TLDMIK(1)K	3	-0.98878	2	0.833	0.741	0.715	1.239	1.084	1.181
Cellular Component	GO:0005925	6	focal adhesion	0.00184201	P23528	92	1.643	Up	3.7006e-05	K	Cofilin-1 OS=Homo sapiens OX=9606 GN=CFL1 PE=1 SV=3	CFL1	1	1.70741e-10	121.99	YALYDATYETK(1)ESK	2	0.88008	2	0.714	0.743	0.716	1.144	1.227	1.2
Cellular Component	GO:0005925	6	focal adhesion	0.00184201	P31946	70	1.526	Up	0.0008628	K	14-3-3 protein beta/alpha OS=Homo sapiens OX=9606 GN=YWHAB PE=1 SV=3	YWHAB	1	1.60397e-05	106.67	VISSIEQK(1)TER	3	-0.051644	2	0.777	0.814	0.701	1.201	1.131	1.165
Cellular Component	GO:0005925	6	focal adhesion	0.00184201	P23284	215	2.768	Up	5.7981e-05	K	Peptidyl-prolyl cis-trans isomerase B OS=Homo sapiens OX=9606 GN=PPIB PE=1 SV=2	PPIB	0.999974	0.00810599	71.531	IEVEKPFAIAK(1)E	2	0.05953	1	0.53	0.45	0.485	1.419	1.275	1.361
Cellular Component	GO:0005925	6	focal adhesion	0.00184201	P23284	186	1.623	Up	0.00046209	K	Peptidyl-prolyl cis-trans isomerase B OS=Homo sapiens OX=9606 GN=PPIB PE=1 SV=2	PPIB	1	0.00214624	76.326	VESTK(1)TDSR	2	1.0719	2	0.776	0.75	0.668	1.175	1.209	1.177
Cellular Component	GO:0005925	6	focal adhesion	0.00184201	P23284	129	1.737	Up	2.1985e-06	K	Peptidyl-prolyl cis-trans isomerase B OS=Homo sapiens OX=9606 GN=PPIB PE=1 SV=2	PPIB	1	0.0113626	70.942	FPDENFK(1)LK	3	-0.38822	2	0.71	0.703	0.677	1.218	1.193	1.22
Cellular Component	GO:0005925	6	focal adhesion	0.00184201	P13987	90	2.086	Up	2.1035e-06	K	CD59 glycoprotein OS=Homo sapiens OX=9606 GN=CD59 PE=1 SV=1	CD59	1	3.9152e-08	141.13	ENELTYYCCK(1)K	2	-0.33008	2	0.61	0.612	0.605	1.303	1.29	1.218
Cellular Component	GO:0005925	6	focal adhesion	0.00184201	P13987	66	1.753	Up	0.00061964	K	CD59 glycoprotein OS=Homo sapiens OX=9606 GN=CD59 PE=1 SV=1	CD59	1	4.46545e-17	135.72	CWK(1)FEHCNFNDVTTR	3	-2.6005	1	0.661	0.66	0.756	1.253	1.26	1.128
Cellular Component	GO:0005925	6	focal adhesion	0.00184201	P39023	66	1.637	Up	1.8678e-05	K	60S ribosomal protein L3 OS=Homo sapiens OX=9606 GN=RPL3 PE=1 SV=2	RPL3	1	0.0020035	71.153	EVDRPGSK(1)VNK	3	-0.11062	1	0.705	0.753	0.721	1.174	1.195	1.199
Cellular Component	GO:0005925	6	focal adhesion	0.00184201	P39023	115	1.601	Up	0.00150122	K	60S ribosomal protein L3 OS=Homo sapiens OX=9606 GN=RPL3 PE=1 SV=2	RPL3	1	0.000290809	84.734	TVFAEHISDECK(1)R	3	-0.2477	1	0.682	0.738	0.796	1.244	1.216	1.088
Cellular Component	GO:0005925	6	focal adhesion	0.00184201	P62249	26	1.879	Up	0.0027232	K	40S ribosomal protein S16 OS=Homo sapiens OX=9606 GN=RPS16 PE=1 SV=2	RPS16	1	0.0195879	51.762	TATAVAHCK(1)R	3	-0.38563	1	0.581	0.604	0.786	1.233	1.194	1.277
Cellular Component	GO:0005925	6	focal adhesion	0.00184201	P62277	34	1.54	Up	5.7354e-05	K	40S ribosomal protein S13 OS=Homo sapiens OX=9606 GN=RPS13 PE=1 SV=2	RPS13	1	4.38739e-08	131.35	LTSDDVK(1)EQIYK	2	0.23715	1	0.761	0.744	0.773	1.215	1.163	1.13
Cellular Component	GO:0005925	6	focal adhesion	0.00184201	P62269	137	1.73	Up	2.4191e-06	K	40S ribosomal protein S18 OS=Homo sapiens OX=9606 GN=RPS18 PE=1 SV=3	RPS18	1	0.00404982	83.438	GQHTK(1)TTGR	2	0.13381	2	0.682	0.709	0.705	1.22	1.182	1.224
Cellular Component	GO:0005925	6	focal adhesion	0.00184201	P35221	881	1.511	Up	0.00040268	K	Catenin alpha-1 OS=Homo sapiens OX=9606 GN=CTNNA1 PE=1 SV=1	CTNNA1	1	0.00164808	73.927	EKQDETQTK(1)IK	3	0.98541	1	0.774	0.811	0.723	1.193	1.172	1.122
Cellular Component	GO:0005925	6	focal adhesion	0.00184201	P11021	553	1.584	Up	0.00051646	K	Endoplasmic reticulum chaperone BiP OS=Homo sapiens OX=9606 GN=HSPA5 PE=1 SV=2	HSPA5	1	0.0198462	68.915	FAEEDK(1)K	3	0.25072	1	0.739	0.758	0.737	1.273	1.094	1.171
Cellular Component	GO:0005925	6	focal adhesion	0.00184201	P11021	352	1.593	Up	7.6558e-05	K	Endoplasmic reticulum chaperone BiP OS=Homo sapiens OX=9606 GN=HSPA5 PE=1 SV=2	HSPA5	1	0.000769989	104.22	VLEDSDLK(1)K	3	2.7364	2	0.731	0.73	0.76	1.123	1.214	1.2
Cellular Component	GO:0000790	13	nuclear chromatin	0.0598553	P07910	176	1.934	Up	2.1133e-05	K	Heterogeneous nuclear ribonucleoproteins C1/C2 OS=Homo sapiens OX=9606 GN=HNRNPC PE=1 SV=4	HNRNPC	1	4.37087e-06	137.4	SGFNSK(1)SGQR	2	0.17987	2	0.61	0.654	0.667	1.26	1.219	1.256
Cellular Component	GO:0000790	13	nuclear chromatin	0.0598553	P45973	91	1.882	Up	0.000176434	K	Chromobox protein homolog 5 OS=Homo sapiens OX=9606 GN=CBX5 PE=1 SV=1	CBX5	1	6.4636e-18	162.37	K(1)SNFSNSADDIK	2	-0.43997	1	0.616	0.7	0.656	1.302	1.23	1.179
Cellular Component	GO:0000790	13	nuclear chromatin	0.0598553	P10412	63	1.615	Up	2.6726e-09	K	Histone H1.4 OS=Homo sapiens OX=9606 GN=H1-4 PE=1 SV=2	H1-4	1	0.000637306	85.355	SGVSLAALK(1)K	3	0.16261	1	0.734	0.735	0.733	1.191	1.181	1.184
Cellular Component	GO:0000790	13	nuclear chromatin	0.0598553	P62805	92	2.182	Up	1.6411e-05	K	Histone H4 OS=Homo sapiens OX=9606 GN=H4C1 PE=1 SV=2	H4C1	1	6.24962e-36	186.16	TVTAMDVVYALK(1)R	2	-0.23684	16	0.562	0.581	0.621	1.289	1.292	1.268
Cellular Component	GO:0000790	13	nuclear chromatin	0.0598553	P62805	32	1.653	Up	0.0134408	K	Histone H4 OS=Homo sapiens OX=9606 GN=H4C1 PE=1 SV=2	H4C1	1	3.04485e-08	128.68	DNIQGITK(1)PAIR	2	0.4573	2	0.677	0.679	0.809	1.203	1.199	1.177
Cellular Component	GO:0000790	13	nuclear chromatin	0.0598553	P62805	80	2.391	Up	2.114e-07	K	Histone H4 OS=Homo sapiens OX=9606 GN=H4C1 PE=1 SV=2	H4C1	1	3.87738e-17	153.23	K(1)TVTAMDVVYALK(1)R	3	-0.75923	21	0.556	0.541	0.548	1.342	1.293	1.298
Cellular Component	GO:0000790	13	nuclear chromatin	0.0598553	P62805	78	1.846	Up	1.73873e-05	K	Histone H4 OS=Homo sapiens OX=9606 GN=H4C1 PE=1 SV=2	H4C1	1	3.72767e-11	151.98	DAVTYTEHAK(1)R	2	0.33428	3	0.693	0.658	0.65	1.26	1.199	1.235
Cellular Component	GO:0000790	13	nuclear chromatin	0.0598553	P62805	17	1.611	Up	2.4396e-05	K	Histone H4 OS=Homo sapiens OX=9606 GN=H4C1 PE=1 SV=2	H4C1	1	1.37446e-45	190.24	GLGK(1)GGAK(1)R	2	-1.3239	136	0.728	0.747	0.73	1.202	1.136	1.215
Cellular Component	GO:0000790	13	nuclear chromatin	0.0598553	Q71UI9	8	1.776	Up	7.1996e-08	K	Histone H2A.V OS=Homo sapiens OX=9606 GN=H2AFV PE=1 SV=3	H2AFV	1	5.25348e-06	111.64	AGK(1)DSGK(1)AK(1)AK	2	0.56256	10	0.682	0.683	0.692	1.231	1.214	1.209
Cellular Component	GO:0000790	13	nuclear chromatin	0.0598553	Q71UI9	12	1.771	Up	4.7604e-08	K	Histone H2A.V OS=Homo sapiens OX=9606 GN=H2AFV PE=1 SV=3	H2AFV	1	5.25348e-06	111.64	AGK(1)DSGK(1)AK(1)AK	2	0.56256	8	0.684	0.688	0.689	1.228	1.219	1.203
Cellular Component	GO:0000790	13	nuclear chromatin	0.0598553	Q71UI9	14	1.84	Up	6.056e-07	K	Histone H2A.V OS=Homo sapiens OX=9606 GN=H2AFV PE=1 SV=3	H2AFV	1	0.00142022	96.464	AGK(1)DSGK(1)AK(1)AK	2	0.56256	2	0.675	0.674	0.655	1.23	1.211	1.247
Cellular Component	GO:0000790	13	nuclear chromatin	0.0598553	Q99525	17	1.747	Up	0.020535	K	Histone H4-like protein type G OS=Homo sapiens OX=9606 GN=HIST1H4G PE=1 SV=1	HIST1H4G	1	0.00152844	84.31	GLGK(1)GGAK(1)CHR	3	1.0158	1	0.68	0.775	0.62	1.094	0.996	1.535
Cellular Component	GO:0000790	13	nuclear chromatin	0.0598553	P26583	3	2.956	Up	1.481e-06	K	High mobility group protein B2 OS=Homo sapiens OX=9606 GN=HMGB2 PE=1 SV=2	HMGB2	0.999989	0.00434355	72.928	GK(1)GDPNKPR	3	-2.3564	2	0.457	0.487	0.444	1.378	1.343	1.382
Cellular Component	GO:0000790	13	nuclear chromatin	0.0598553	Q96KK5	37	1.556	Up	0.00027896	K	Histone H2A type 1-H OS=Homo sapiens OX=9606 GN=HIST1H2AH PE=1 SV=3	HIST1H2AH	1	0.012122	96.311	K(1)GNYAER	2	0.80708	1	0.728	0.743	0.79	1.238	1.142	1.138
Cellular Component	GO:0000790	13	nuclear chromatin	0.0598553	Q96KK5	96	1.532	Up	0.000135907	K	Histone H2A type 1-H OS=Homo sapiens OX=9606 GN=HIST1H2AH PE=1 SV=3	HIST1H2AH	1	3.40253e-08	141.58	NDEELNK(1)LLGK	2	-0.23047	2	0.728	0.792	0.764	1.153	1.204	1.141
Cellular Component	GO:0000790	13	nuclear chromatin	0.0598553	Q96KK5	126	1.639	Up	7.7928e-05	K	Histone H2A type 1-H OS=Homo sapiens OX=9606 GN=HIST1H2AH PE=1 SV=3	HIST1H2AH	1	0.00072571	91.318	TESHHK(1)AK	3	0.69454	6	0.726	0.693	0.76	1.222	1.176	1.174
Cellular Component	GO:0000790	13	nuclear chromatin	0.0598553	P0C0S5	8	2.197	Up	4.9094e-07	K	Histone H2A.Z OS=Homo sapiens OX=9606 GN=H2AZ1 PE=1 SV=2	H2AZ1	1	2.41356e-07	111.64	AGK(1)DSGK(1)AK(1)TK	2	0.79948	12	0.591	0.582	0.583	1.323	1.257	1.278
Cellular Component	GO:0000790	13	nuclear chromatin	0.0598553	P0C0S5	12	2.225	Up	3.9617e-07	K	Histone H2A.Z OS=Homo sapiens OX=9606 GN=H2AZ1 PE=1 SV=2	H2AZ1	1	2.41356e-07	111.64	AGK(1)DSGK(1)AK(1)TK	2	0.79948	10	0.585	0.579	0.575	1.326	1.264	1.279
Cellular Component	GO:0000790	13	nuclear chromatin	0.0598553	P0C0S5	5	1.669	Up	5.8561e-05	K	Histone H2A.Z OS=Homo sapiens OX=9606 GN=H2AZ1 PE=1 SV=2	H2AZ1	1	2.41356e-07	111.64	AGGK(1)AGK(1)DSGK(1)AK(1)TK	2	0.11281	10	0.749	0.714	0.689	1.227	1.164	1.201
Cellular Component	GO:0000790	13	nuclear chromatin	0.0598553	P0C0S5	14	2.729	Up	2.1717e-06	K	Histone H2A.Z OS=Homo sapiens OX=9606 GN=H2AZ1 PE=1 SV=2	H2AZ1	1	2.41356e-07	106.57	AGK(1)DSGK(1)AK(1)TK	2	0.79948	4	0.511	0.491	0.48	1.402	1.295	1.348
Cellular Component	GO:0000790	13	nuclear chromatin	0.0598553	Q92793	1811	7.596	Up	0.00094031	K	CREB-binding protein OS=Homo sapiens OX=9606 GN=CREBBP PE=1 SV=3	CREBBP	1	0.00377762	83.182	K(1)TNGGCPVCK	2	0.18561	1	0.185	0.196	0.228	1.546	1.535	1.545
Cellular Component	GO:0000790	13	nuclear chromatin	0.0598553	Q96T88	546	1.987	Up	0.0040585	K	E3 ubiquitin-protein ligase UHRF1 OS=Homo sapiens OX=9606 GN=UHRF1 PE=1 SV=1	UHRF1	1	0.000183326	96.059	NSK(1)YAPAEGNR	2	0.1761	1	0.675	0.581	0.638	1.244	1.265	1.255
Cellular Component	GO:0031526	9	brush border membrane	0.0740246	Q9UPX8	1174	1.904	Up	0.00047943	K	SH3 and multiple ankyrin repeat domains protein 2 OS=Homo sapiens OX=9606 GN=SHANK2 PE=1 SV=3	SHANK2	1	0.0255254	57.281	MK(1)PIIHK	3	-3.76	1	0.718	0.65	0.589	1.296	1.239	1.192
Cellular Component	GO:0031526	9	brush border membrane	0.0740246	P15291	348	1.811	Up	0.0005237	K	Beta-1,4-galactosyltransferase 1 OS=Homo sapiens OX=9606 GN=B4GALT1 PE=1 SV=5	B4GALT1	1	0.0295481	72.23	K(1)NEPNPQR	2	0.42742	1	0.751	0.632	0.648	1.279	1.22	1.18
Cellular Component	GO:0016234	6	inclusion body	0.303814	Q9NRD5	88	2.812	Up	3.5799e-06	K	PRKCA-binding protein OS=Homo sapiens OX=9606 GN=PICK1 PE=1 SV=2	PICK1	1	0.0229749	55.261	VEVAK(1)MIQEVK	2	0.85616	1	0.484	0.504	0.458	1.401	1.307	1.358
Cellular Component	GO:0016234	6	inclusion body	0.303814	P13639	32	1.652	Up	0.0028208	K	Elongation factor 2 OS=Homo sapiens OX=9606 GN=EEF2 PE=1 SV=4	EEF2	1	0.000910029	50.858	NMSVIAHVDHGK(1)STLTDSLVCK	4	-0.77941	1	0.655	0.728	0.777	1.058	1.229	1.282
Cellular Component	GO:0016234	6	inclusion body	0.303814	P62195	330	2.306	Up	0.0105445	K	26S proteasome regulatory subunit 8 OS=Homo sapiens OX=9606 GN=PSMC5 PE=1 SV=1	PSMC5	1	0.006593	64.82	LDILK(1)IHSR	3	-0.7783	1	0.602	0.591	0.492	0.932	1.66	1.293
Cellular Component	GO:0098794	4	postsynapse	0.0127298	Q9UPX8	1174	1.904	Up	0.00047943	K	SH3 and multiple ankyrin repeat domains protein 2 OS=Homo sapiens OX=9606 GN=SHANK2 PE=1 SV=3	SHANK2	1	0.0255254	57.281	MK(1)PIIHK	3	-3.76	1	0.718	0.65	0.589	1.296	1.239	1.192
Cellular Component	GO:0098794	4	postsynapse	0.0127298	P35580	1782	1.618	Up	0.00133836	K	Myosin-10 OS=Homo sapiens OX=9606 GN=MYH10 PE=1 SV=3	MYH10	1	0.000848405	90.614	SAAQK(1)SDNAR	2	-0.18483	1	0.811	0.675	0.713	1.145	1.249	1.164
Cellular Component	GO:0098794	4	postsynapse	0.0127298	P23528	92	1.643	Up	3.7006e-05	K	Cofilin-1 OS=Homo sapiens OX=9606 GN=CFL1 PE=1 SV=3	CFL1	1	1.70741e-10	121.99	YALYDATYETK(1)ESK	2	0.88008	2	0.714	0.743	0.716	1.144	1.227	1.2
Cellular Component	GO:0098794	4	postsynapse	0.0127298	P62195	330	2.306	Up	0.0105445	K	26S proteasome regulatory subunit 8 OS=Homo sapiens OX=9606 GN=PSMC5 PE=1 SV=1	PSMC5	1	0.006593	64.82	LDILK(1)IHSR	3	-0.7783	1	0.602	0.591	0.492	0.932	1.66	1.293
Cellular Component	GO:0098794	4	postsynapse	0.0127298	Q7L576	1188	1.882	Up	5.6212e-05	K	Cytoplasmic FMR1-interacting protein 1 OS=Homo sapiens OX=9606 GN=CYFIP1 PE=1 SV=1	CYFIP1	0.999952	0.000231257	89.231	VQK(1)HDGKDEIIK	4	-1.3205	2	0.634	0.688	0.65	1.296	1.192	1.224
Cellular Component	GO:0098794	4	postsynapse	0.0127298	Q9NRD5	88	2.812	Up	3.5799e-06	K	PRKCA-binding protein OS=Homo sapiens OX=9606 GN=PICK1 PE=1 SV=2	PICK1	1	0.0229749	55.261	VEVAK(1)MIQEVK	2	0.85616	1	0.484	0.504	0.458	1.401	1.307	1.358
Cellular Component	GO:0098794	4	postsynapse	0.0127298	P27824	87	1.514	Up	0.00095527	K	Calnexin OS=Homo sapiens OX=9606 GN=CANX PE=1 SV=2	CANX	1	0.014782	46.88	GTLSGWILSK(1)AK	3	-0.67335	1	0.807	0.786	0.712	1.226	1.112	1.152
Cellular Component	GO:0098794	4	postsynapse	0.0127298	Q4V328	230	1.993	Up	2.4653e-05	K	GRIP1-associated protein 1 OS=Homo sapiens OX=9606 GN=GRIPAP1 PE=1 SV=2	GRIPAP1	1	0.00135038	86.772	LQEELAK(1)LSEK	3	-0.18655	2	0.659	0.631	0.6	1.287	1.212	1.268
Cellular Component	GO:0098794	4	postsynapse	0.0127298	Q13009	564	2.554	Up	2.264e-05	K	T-lymphoma invasion and metastasis-inducing protein 1 OS=Homo sapiens OX=9606 GN=TIAM1 PE=1 SV=2	TIAM1	1	0.00536023	86.794	LLK(1)SEIK	3	-0.69534	1	0.501	0.52	0.54	1.387	1.234	1.366
Cellular Component	GO:0098794	4	postsynapse	0.0127298	P24043	3092	1.918	Up	1.50302e-05	K	Laminin subunit alpha-2 OS=Homo sapiens OX=9606 GN=LAMA2 PE=1 SV=4	LAMA2	1	0.0350388	67.385	GCIRSLK(1)LTK	2	3.4243	1	0.661	0.626	0.658	1.283	1.221	1.227
Cellular Component	GO:0098794	4	postsynapse	0.0127298	Q14247	161	1.788	Up	3.79e-05	K	Src substrate cortactin OS=Homo sapiens OX=9606 GN=CTTN PE=1 SV=2	CTTN	1	5.64477e-17	133.78	DYSSGFGGK(1)YGVQADR	2	0.1629	2	0.677	0.659	0.712	1.252	1.23	1.179
Cellular Component	GO:0098794	4	postsynapse	0.0127298	Q14247	198	1.588	Up	0.00024373	K	Src substrate cortactin OS=Homo sapiens OX=9606 GN=CTTN PE=1 SV=2	CTTN	1	6.55628e-07	113.24	GFGGK(1)YGIDK	3	-0.15514	2	0.734	0.77	0.724	1.251	1.119	1.169
Cellular Component	GO:0016323	8	basolateral plasma membrane	0.220675	P23229	144	3.768	Up	1.57151e-05	K	Integrin alpha-6 OS=Homo sapiens OX=9606 GN=ITGA6 PE=1 SV=5	ITGA6	1	3.1719e-06	130.01	QHVNTK(1)QESR	2	1.0391	2	0.354	0.398	0.382	1.474	1.325	1.474
Cellular Component	GO:0016323	8	basolateral plasma membrane	0.220675	P23229	594	2.852	Up	0.0097615	K	Integrin alpha-6 OS=Homo sapiens OX=9606 GN=ITGA6 PE=1 SV=5	ITGA6	1	0.0014851	102.53	YTQELTLK(1)R	2	0.55207	2	0.382	0.524	0.521	1.331	1.345	1.394
Cellular Component	GO:0016323	8	basolateral plasma membrane	0.220675	P16422	106	1.604	Up	9.7064e-05	K	Epithelial cell adhesion molecule OS=Homo sapiens OX=9606 GN=EPCAM PE=1 SV=2	EPCAM	1	1.06393e-16	97.771	AKPEGALQNNDGLYDPDCDESGLFK(1)AK	4	-0.73346	3	0.778	0.711	0.724	1.211	1.164	1.175
Cellular Component	GO:0016323	8	basolateral plasma membrane	0.220675	P16422	160	10.663	Up	1.6533e-07	K	Epithelial cell adhesion molecule OS=Homo sapiens OX=9606 GN=EPCAM PE=1 SV=2	EPCAM	1	0.000107872	110.08	EKPYDSK(1)SLR	2	-0.057166	2	0.152	0.147	0.146	1.691	1.532	1.522
Cellular Component	GO:0016323	8	basolateral plasma membrane	0.220675	P15291	348	1.811	Up	0.0005237	K	Beta-1,4-galactosyltransferase 1 OS=Homo sapiens OX=9606 GN=B4GALT1 PE=1 SV=5	B4GALT1	1	0.0295481	72.23	K(1)NEPNPQR	2	0.42742	1	0.751	0.632	0.648	1.279	1.22	1.18
Cellular Component	GO:0016323	8	basolateral plasma membrane	0.220675	Q03135	57	1.523	Up	0.0012176	K	Caveolin-1 OS=Homo sapiens OX=9606 GN=CAV1 PE=1 SV=4	CAV1	1	0.00201216	67.997	DPK(1)HLNDDVVK	3	1.0261	1	0.694	0.781	0.816	1.145	1.139	1.206
Cellular Component	GO:0016323	8	basolateral plasma membrane	0.220675	P04920	893	4.44	Up	4.2628e-05	K	Anion exchange protein 2 OS=Homo sapiens OX=9606 GN=SLC4A2 PE=1 SV=4	SLC4A2	1	2.23352e-06	112.42	SLAGQSGQGK(1)PR	2	-2.3535	1	0.287	0.375	0.323	1.476	1.415	1.482
Cellular Component	GO:0000784	13	nuclear chromosome, telomeric region	0.135161	P45973	91	1.882	Up	0.000176434	K	Chromobox protein homolog 5 OS=Homo sapiens OX=9606 GN=CBX5 PE=1 SV=1	CBX5	1	6.4636e-18	162.37	K(1)SNFSNSADDIK	2	-0.43997	1	0.616	0.7	0.656	1.302	1.23	1.179
Cellular Component	GO:0000784	13	nuclear chromosome, telomeric region	0.135161	P62805	92	2.182	Up	1.6411e-05	K	Histone H4 OS=Homo sapiens OX=9606 GN=H4C1 PE=1 SV=2	H4C1	1	6.24962e-36	186.16	TVTAMDVVYALK(1)R	2	-0.23684	16	0.562	0.581	0.621	1.289	1.292	1.268
Cellular Component	GO:0000784	13	nuclear chromosome, telomeric region	0.135161	P62805	32	1.653	Up	0.0134408	K	Histone H4 OS=Homo sapiens OX=9606 GN=H4C1 PE=1 SV=2	H4C1	1	3.04485e-08	128.68	DNIQGITK(1)PAIR	2	0.4573	2	0.677	0.679	0.809	1.203	1.199	1.177
Cellular Component	GO:0000784	13	nuclear chromosome, telomeric region	0.135161	P62805	80	2.391	Up	2.114e-07	K	Histone H4 OS=Homo sapiens OX=9606 GN=H4C1 PE=1 SV=2	H4C1	1	3.87738e-17	153.23	K(1)TVTAMDVVYALK(1)R	3	-0.75923	21	0.556	0.541	0.548	1.342	1.293	1.298
Cellular Component	GO:0000784	13	nuclear chromosome, telomeric region	0.135161	P62805	78	1.846	Up	1.73873e-05	K	Histone H4 OS=Homo sapiens OX=9606 GN=H4C1 PE=1 SV=2	H4C1	1	3.72767e-11	151.98	DAVTYTEHAK(1)R	2	0.33428	3	0.693	0.658	0.65	1.26	1.199	1.235
Cellular Component	GO:0000784	13	nuclear chromosome, telomeric region	0.135161	P62805	17	1.611	Up	2.4396e-05	K	Histone H4 OS=Homo sapiens OX=9606 GN=H4C1 PE=1 SV=2	H4C1	1	1.37446e-45	190.24	GLGK(1)GGAK(1)R	2	-1.3239	136	0.728	0.747	0.73	1.202	1.136	1.215
Cellular Component	GO:0000784	13	nuclear chromosome, telomeric region	0.135161	P39748	375	1.672	Up	0.00041838	K	Flap endonuclease 1 OS=Homo sapiens OX=9606 GN=FEN1 PE=1 SV=1	FEN1	1	0.00781029	71.379	TGAAGK(1)FK	3	0.36582	1	0.705	0.708	0.735	1.166	1.305	1.121
Cellular Component	GO:0000784	13	nuclear chromosome, telomeric region	0.135161	Q16531	191	1.804	Up	3.8213e-05	K	DNA damage-binding protein 1 OS=Homo sapiens OX=9606 GN=DDB1 PE=1 SV=1	DDB1	1	5.7889e-05	94.363	HVK(1)TYEVSLR	3	-1.2231	2	0.644	0.677	0.712	1.233	1.223	1.211
Cellular Component	GO:0000784	13	nuclear chromosome, telomeric region	0.135161	P27694	163	2.076	Up	1.81648e-05	K	Replication protein A 70 kDa DNA-binding subunit OS=Homo sapiens OX=9606 GN=RPA1 PE=1 SV=2	RPA1	1	9.99335e-08	143.97	AYGASK(1)TFGK	3	1.1683	2	0.616	0.618	0.6	1.341	1.243	1.224
Cellular Component	GO:0000784	13	nuclear chromosome, telomeric region	0.135161	Q14566	407	1.656	Up	0.00065503	K	DNA replication licensing factor MCM6 OS=Homo sapiens OX=9606 GN=MCM6 PE=1 SV=1	MCM6	1	0.0114761	46.318	SQFLK(1)HVEEFSPR	3	-1.3201	1	0.727	0.75	0.689	1.303	1.168	1.116
Cellular Component	GO:0000784	13	nuclear chromosome, telomeric region	0.135161	P78527	3642	1.51	Up	2.3019e-05	K	DNA-dependent protein kinase catalytic subunit OS=Homo sapiens OX=9606 GN=PRKDC PE=1 SV=3	PRKDC	1	0.0283698	49.715	EFDK(1)HFGK	3	0.53551	1	0.784	0.759	0.766	1.191	1.169	1.127
Cellular Component	GO:0005801	8	cis-Golgi network	0.345341	O95249	124	1.633	Up	0.0022039	K	Golgi SNAP receptor complex member 1 OS=Homo sapiens OX=9606 GN=GOSR1 PE=1 SV=1	GOSR1	1	2.93662e-06	104.95	DILQDYTHEFHK(1)TK	4	0.62103	1	0.768	0.648	0.771	1.278	1.109	1.185
Cellular Component	GO:0005801	8	cis-Golgi network	0.345341	Q15643	819	1.941	Up	0.000179346	K	Thyroid receptor-interacting protein 11 OS=Homo sapiens OX=9606 GN=TRIP11 PE=1 SV=3	TRIP11	1	0.025517	51.346	EIFIEK(1)LK	3	0.83552	1	0.602	0.698	0.625	1.244	1.199	1.294
Cellular Component	GO:0030863	11	cortical cytoskeleton	0.215788	P21333	994	1.525	Up	1.9772e-05	K	Filamin-A OS=Homo sapiens OX=9606 GN=FLNA PE=1 SV=4	FLNA	1	0.00346172	85.813	DQEFTVK(1)SK	3	-0.051795	2	0.786	0.743	0.763	1.155	1.183	1.157
Cellular Component	GO:0030863	11	cortical cytoskeleton	0.215788	Q13813	296	1.717	Up	0.0100175	K	Spectrin alpha chain, non-erythrocytic 1 OS=Homo sapiens OX=9606 GN=SPTAN1 PE=1 SV=3	SPTAN1	1	0.0243338	65.246	K(1)HEGLER	3	1.0588	1	0.744	0.691	0.678	1.258	1.405	0.965
Cellular Component	GO:0030863	11	cortical cytoskeleton	0.215788	Q14247	161	1.788	Up	3.79e-05	K	Src substrate cortactin OS=Homo sapiens OX=9606 GN=CTTN PE=1 SV=2	CTTN	1	5.64477e-17	133.78	DYSSGFGGK(1)YGVQADR	2	0.1629	2	0.677	0.659	0.712	1.252	1.23	1.179
Cellular Component	GO:0030863	11	cortical cytoskeleton	0.215788	Q14247	198	1.588	Up	0.00024373	K	Src substrate cortactin OS=Homo sapiens OX=9606 GN=CTTN PE=1 SV=2	CTTN	1	6.55628e-07	113.24	GFGGK(1)YGIDK	3	-0.15514	2	0.734	0.77	0.724	1.251	1.119	1.169
Cellular Component	GO:0030863	11	cortical cytoskeleton	0.215788	O43707	779	1.506	Up	4.621e-06	K	Alpha-actinin-4 OS=Homo sapiens OX=9606 GN=ACTN4 PE=1 SV=2	ACTN4	1	2.1119e-07	92.098	ASFNHFDK(1)DHGGALGPEEFK	4	-0.48137	1	0.769	0.755	0.788	1.156	1.148	1.177
Cellular Component	GO:0017053	3	transcriptional repressor complex	0.168926	P45973	91	1.882	Up	0.000176434	K	Chromobox protein homolog 5 OS=Homo sapiens OX=9606 GN=CBX5 PE=1 SV=1	CBX5	1	6.4636e-18	162.37	K(1)SNFSNSADDIK	2	-0.43997	1	0.616	0.7	0.656	1.302	1.23	1.179
Cellular Component	GO:0017053	3	transcriptional repressor complex	0.168926	P31946	70	1.526	Up	0.0008628	K	14-3-3 protein beta/alpha OS=Homo sapiens OX=9606 GN=YWHAB PE=1 SV=3	YWHAB	1	1.60397e-05	106.67	VISSIEQK(1)TER	3	-0.051644	2	0.777	0.814	0.701	1.201	1.131	1.165
Cellular Component	GO:0017053	3	transcriptional repressor complex	0.168926	Q16576	119	2.127	Up	3.7226e-05	K	Histone-binding protein RBBP7 OS=Homo sapiens OX=9606 GN=RBBP7 PE=1 SV=1	RBBP7	1	2.4167e-06	103.6	IECEIK(1)INHEGEVNR	3	-0.030188	1	0.614	0.618	0.566	1.256	1.233	1.335
Cellular Component	GO:0098562	5	cytoplasmic side of membrane	0.215788	P06703	26	2.219	Up	4.3761e-07	K	Protein S100-A6 OS=Homo sapiens OX=9606 GN=S100A6 PE=1 SV=1	S100A6	1	0.000547997	123.67	EGDK(1)HTLSK	3	0.31653	4	0.577	0.586	0.58	1.326	1.28	1.261
Cellular Component	GO:0098562	5	cytoplasmic side of membrane	0.215788	P36507	108	1.663	Up	0.0022007	K	Dual specificity mitogen-activated protein kinase kinase 2 OS=Homo sapiens OX=9606 GN=MAP2K2 PE=1 SV=1	MAP2K2	1	4.9811e-05	95.483	LIHLEIK(1)PAIR	3	-0.84799	1	0.79	0.663	0.705	1.236	1.078	1.275
Cellular Component	GO:0098562	5	cytoplasmic side of membrane	0.215788	Q9H444	14	1.582	Up	0.0041192	K	Charged multivesicular body protein 4b OS=Homo sapiens OX=9606 GN=CHMP4B PE=1 SV=1	CHMP4B	1	3.09123e-05	113.93	LFGAGGGK(1)AGK	3	-0.24622	2	0.803	0.777	0.655	1.145	1.286	1.105
Cellular Component	GO:0098562	5	cytoplasmic side of membrane	0.215788	Q13009	564	2.554	Up	2.264e-05	K	T-lymphoma invasion and metastasis-inducing protein 1 OS=Homo sapiens OX=9606 GN=TIAM1 PE=1 SV=2	TIAM1	1	0.00536023	86.794	LLK(1)SEIK	3	-0.69534	1	0.501	0.52	0.54	1.387	1.234	1.366
Cellular Component	GO:0000118	13	histone deacetylase complex	0.250745	P45973	91	1.882	Up	0.000176434	K	Chromobox protein homolog 5 OS=Homo sapiens OX=9606 GN=CBX5 PE=1 SV=1	CBX5	1	6.4636e-18	162.37	K(1)SNFSNSADDIK	2	-0.43997	1	0.616	0.7	0.656	1.302	1.23	1.179
Cellular Component	GO:0000118	13	histone deacetylase complex	0.250745	Q16576	119	2.127	Up	3.7226e-05	K	Histone-binding protein RBBP7 OS=Homo sapiens OX=9606 GN=RBBP7 PE=1 SV=1	RBBP7	1	2.4167e-06	103.6	IECEIK(1)INHEGEVNR	3	-0.030188	1	0.614	0.618	0.566	1.256	1.233	1.335
Cellular Component	GO:0005605	7	basal lamina	0.0145626	P24043	3092	1.918	Up	1.50302e-05	K	Laminin subunit alpha-2 OS=Homo sapiens OX=9606 GN=LAMA2 PE=1 SV=4	LAMA2	1	0.0350388	67.385	GCIRSLK(1)LTK	2	3.4243	1	0.661	0.626	0.658	1.283	1.221	1.227
Cellular Component	GO:0005605	7	basal lamina	0.0145626	Q16787	2135	1.622	Up	3.461e-06	K	Laminin subunit alpha-3 OS=Homo sapiens OX=9606 GN=LAMA3 PE=1 SV=2	LAMA3	1	0.000133898	89.507	SAGK(1)TSLVEEAEK	2	-0.15811	2	0.721	0.727	0.746	1.166	1.178	1.214
Cellular Component	GO:0044391	9	ribosomal subunit	0.0378475	P18124	223	1.556	Up	0.00049647	K	60S ribosomal protein L7 OS=Homo sapiens OX=9606 GN=RPL7 PE=1 SV=1	RPL7	1	2.59475e-29	179.94	K(1)TTHFVEGGDAGNREDQINR	3	-0.098351	4	0.789	0.778	0.693	1.183	1.144	1.19
Cellular Component	GO:0044391	9	ribosomal subunit	0.0378475	P09001	235	2.005	Up	0.00074339	K	39S ribosomal protein L3, mitochondrial OS=Homo sapiens OX=9606 GN=MRPL3 PE=1 SV=1	MRPL3	1	7.32746e-11	124.42	GQPATHGQTK(1)THR	3	-0.88038	2	0.604	0.565	0.712	1.324	1.19	1.258
Cellular Component	GO:0044391	9	ribosomal subunit	0.0378475	P61254	134	1.568	Up	0.00037638	K	60S ribosomal protein L26 OS=Homo sapiens OX=9606 GN=RPL26 PE=1 SV=1	RPL26	0.995798	0.000775493	81.92	GK(0.996)YK(0.004)EETIEK	3	0.22442	1	0.805	0.735	0.71	1.213	1.158	1.157
Cellular Component	GO:0044391	9	ribosomal subunit	0.0378475	P15880	275	3.946	Up	0.020878	K	40S ribosomal protein S2 OS=Homo sapiens OX=9606 GN=RPS2 PE=1 SV=2	RPS2	1	0.00013314	66.289	SPYQEFTDHLVK(1)THTR	4	-0.31731	1		0.19	0.445	1.296	1.113	1.35
Cellular Component	GO:0044391	9	ribosomal subunit	0.0378475	P62263	106	4.268	Up	8.5519e-07	K	40S ribosomal protein S14 OS=Homo sapiens OX=9606 GN=RPS14 PE=1 SV=3	RPS14	1	0.000851749	84.173	TK(1)TPGPGAQSALR	2	-2.5539	1	0.322	0.351	0.346	1.465	1.393	1.491
Cellular Component	GO:0044391	9	ribosomal subunit	0.0378475	P62263	96	1.537	Up	0.0272	K	40S ribosomal protein S14 OS=Homo sapiens OX=9606 GN=RPS14 PE=1 SV=3	RPS14	1	7.38528e-07	110.08	ELGITALHIK(1)LR	3	0.52572	2	0.692	0.795	0.788	0.974	1.432	1.09
Cellular Component	GO:0044391	9	ribosomal subunit	0.0378475	Q96DV4	148	2.049	Up	0.00029983	K	39S ribosomal protein L38, mitochondrial OS=Homo sapiens OX=9606 GN=MRPL38 PE=1 SV=2	MRPL38	1	0.00102008	84.083	TCGPYHK(1)QR	3	-0.20609	2	0.652	0.598	0.604	1.37	1.29	1.139
Cellular Component	GO:0044391	9	ribosomal subunit	0.0378475	P62917	46	1.894	Up	1.75293e-05	K	60S ribosomal protein L8 OS=Homo sapiens OX=9606 GN=RPL8 PE=1 SV=2	RPL8	1	0.000128202	96.464	GIVK(1)DIIHDPGR	2	-0.25301	2	0.668	0.643	0.653	1.287	1.189	1.244
Cellular Component	GO:0044391	9	ribosomal subunit	0.0378475	P62753	243	1.631	Up	0.000121433	K	40S ribosomal protein S6 OS=Homo sapiens OX=9606 GN=RPS6 PE=1 SV=1	RPS6	1	1.94239e-06	121.29	ASTSK(1)SESSQK	2	0.72863	2	0.736	0.685	0.766	1.194	1.197	1.175
Cellular Component	GO:0044391	9	ribosomal subunit	0.0378475	Q02878	192	1.535	Up	0.00026491	K	60S ribosomal protein L6 OS=Homo sapiens OX=9606 GN=RPL6 PE=1 SV=3	RPL6	1	0.000693341	75.589	THQK(1)FVIATSTK	3	-0.46954	1	0.74	0.814	0.728	1.184	1.162	1.156
Cellular Component	GO:0044391	9	ribosomal subunit	0.0378475	P46777	27	1.597	Up	0.00119775	K	60S ribosomal protein L5 OS=Homo sapiens OX=9606 GN=RPL5 PE=1 SV=3	RPL5	1	0.0161426	70.412	EGK(1)TDYYAR	2	-0.47447	2	0.68	0.764	0.777	1.268	1.167	1.111
Cellular Component	GO:0044391	9	ribosomal subunit	0.0378475	Q9Y2R5	78	1.614	Up	0.0103974	K	28S ribosomal protein S17, mitochondrial OS=Homo sapiens OX=9606 GN=MRPS17 PE=1 SV=1	MRPS17	1	0.0111073	46.88	HVK(1)HELAEIVFK	4	-0.81694	1	0.698	0.883	0.619	1.135	1.24	1.176
Cellular Component	GO:0044391	9	ribosomal subunit	0.0378475	P61313	14	2.205	Up	0.0066215	K	60S ribosomal protein L15 OS=Homo sapiens OX=9606 GN=RPL15 PE=1 SV=2	RPL15	1	0.0353652	47.082	K(1)QSDVMR	2	-0.43104	1	0.66	0.558	0.534	1.303	1.291	1.269
Cellular Component	GO:0044391	9	ribosomal subunit	0.0378475	P46778	55	1.674	Up	0.00098052	K	60S ribosomal protein L21 OS=Homo sapiens OX=9606 GN=RPL21 PE=1 SV=2	RPL21	1	0.00221016	70.908	GMPHK(1)CYHGK	4	-0.32018	1	0.73	0.741	0.677	1.302	1.087	1.207
Cellular Component	GO:0044391	9	ribosomal subunit	0.0378475	P39023	66	1.637	Up	1.8678e-05	K	60S ribosomal protein L3 OS=Homo sapiens OX=9606 GN=RPL3 PE=1 SV=2	RPL3	1	0.0020035	71.153	EVDRPGSK(1)VNK	3	-0.11062	1	0.705	0.753	0.721	1.174	1.195	1.199
Cellular Component	GO:0044391	9	ribosomal subunit	0.0378475	P39023	115	1.601	Up	0.00150122	K	60S ribosomal protein L3 OS=Homo sapiens OX=9606 GN=RPL3 PE=1 SV=2	RPL3	1	0.000290809	84.734	TVFAEHISDECK(1)R	3	-0.2477	1	0.682	0.738	0.796	1.244	1.216	1.088
Cellular Component	GO:0044391	9	ribosomal subunit	0.0378475	P62249	26	1.879	Up	0.0027232	K	40S ribosomal protein S16 OS=Homo sapiens OX=9606 GN=RPS16 PE=1 SV=2	RPS16	1	0.0195879	51.762	TATAVAHCK(1)R	3	-0.38563	1	0.581	0.604	0.786	1.233	1.194	1.277
Cellular Component	GO:0044391	9	ribosomal subunit	0.0378475	Q9BYC8	117	5.343	Up	2.3078e-07	K	39S ribosomal protein L32, mitochondrial OS=Homo sapiens OX=9606 GN=MRPL32 PE=1 SV=1	MRPL32	1	0.000231659	73.722	NNIDVCPECGHLK(1)QK	3	-2.4227	1	0.27	0.294	0.273	1.468	1.495	1.509
Cellular Component	GO:0044391	9	ribosomal subunit	0.0378475	P62277	34	1.54	Up	5.7354e-05	K	40S ribosomal protein S13 OS=Homo sapiens OX=9606 GN=RPS13 PE=1 SV=2	RPS13	1	4.38739e-08	131.35	LTSDDVK(1)EQIYK	2	0.23715	1	0.761	0.744	0.773	1.215	1.163	1.13
Cellular Component	GO:0044391	9	ribosomal subunit	0.0378475	P62269	137	1.73	Up	2.4191e-06	K	40S ribosomal protein S18 OS=Homo sapiens OX=9606 GN=RPS18 PE=1 SV=3	RPS18	1	0.00404982	83.438	GQHTK(1)TTGR	2	0.13381	2	0.682	0.709	0.705	1.22	1.182	1.224
Cellular Component	GO:0000315	11	organellar large ribosomal subunit	0.268941	P09001	235	2.005	Up	0.00074339	K	39S ribosomal protein L3, mitochondrial OS=Homo sapiens OX=9606 GN=MRPL3 PE=1 SV=1	MRPL3	1	7.32746e-11	124.42	GQPATHGQTK(1)THR	3	-0.88038	2	0.604	0.565	0.712	1.324	1.19	1.258
Cellular Component	GO:0000315	11	organellar large ribosomal subunit	0.268941	Q9BYC8	117	5.343	Up	2.3078e-07	K	39S ribosomal protein L32, mitochondrial OS=Homo sapiens OX=9606 GN=MRPL32 PE=1 SV=1	MRPL32	1	0.000231659	73.722	NNIDVCPECGHLK(1)QK	3	-2.4227	1	0.27	0.294	0.273	1.468	1.495	1.509
Cellular Component	GO:0000315	11	organellar large ribosomal subunit	0.268941	Q96DV4	148	2.049	Up	0.00029983	K	39S ribosomal protein L38, mitochondrial OS=Homo sapiens OX=9606 GN=MRPL38 PE=1 SV=2	MRPL38	1	0.00102008	84.083	TCGPYHK(1)QR	3	-0.20609	2	0.652	0.598	0.604	1.37	1.29	1.139
Cellular Component	GO:0035579	12	specific granule membrane	0.157366	Q07065	301	1.726	Up	0.0034984	K	Cytoskeleton-associated protein 4 OS=Homo sapiens OX=9606 GN=CKAP4 PE=1 SV=2	CKAP4	1	0.00142164	100.92	EIQTSAK(1)SR	2	-1.0848	1	0.759	0.586	0.755	1.211	1.151	1.262
Cellular Component	GO:0035579	12	specific granule membrane	0.157366	P13987	90	2.086	Up	2.1035e-06	K	CD59 glycoprotein OS=Homo sapiens OX=9606 GN=CD59 PE=1 SV=1	CD59	1	3.9152e-08	141.13	ENELTYYCCK(1)K	2	-0.33008	2	0.61	0.612	0.605	1.303	1.29	1.218
Cellular Component	GO:0035579	12	specific granule membrane	0.157366	P13987	66	1.753	Up	0.00061964	K	CD59 glycoprotein OS=Homo sapiens OX=9606 GN=CD59 PE=1 SV=1	CD59	1	4.46545e-17	135.72	CWK(1)FEHCNFNDVTTR	3	-2.6005	1	0.661	0.66	0.756	1.253	1.26	1.128
Cellular Component	GO:0032993	3	protein-DNA complex	0.0894431	Q99525	17	1.747	Up	0.020535	K	Histone H4-like protein type G OS=Homo sapiens OX=9606 GN=HIST1H4G PE=1 SV=1	HIST1H4G	1	0.00152844	84.31	GLGK(1)GGAK(1)CHR	3	1.0158	1	0.68	0.775	0.62	1.094	0.996	1.535
Cellular Component	GO:0032993	3	protein-DNA complex	0.0894431	P10412	63	1.615	Up	2.6726e-09	K	Histone H1.4 OS=Homo sapiens OX=9606 GN=H1-4 PE=1 SV=2	H1-4	1	0.000637306	85.355	SGVSLAALK(1)K	3	0.16261	1	0.734	0.735	0.733	1.191	1.181	1.184
Cellular Component	GO:0032993	3	protein-DNA complex	0.0894431	P62805	92	2.182	Up	1.6411e-05	K	Histone H4 OS=Homo sapiens OX=9606 GN=H4C1 PE=1 SV=2	H4C1	1	6.24962e-36	186.16	TVTAMDVVYALK(1)R	2	-0.23684	16	0.562	0.581	0.621	1.289	1.292	1.268
Cellular Component	GO:0032993	3	protein-DNA complex	0.0894431	P62805	32	1.653	Up	0.0134408	K	Histone H4 OS=Homo sapiens OX=9606 GN=H4C1 PE=1 SV=2	H4C1	1	3.04485e-08	128.68	DNIQGITK(1)PAIR	2	0.4573	2	0.677	0.679	0.809	1.203	1.199	1.177
Cellular Component	GO:0032993	3	protein-DNA complex	0.0894431	P62805	80	2.391	Up	2.114e-07	K	Histone H4 OS=Homo sapiens OX=9606 GN=H4C1 PE=1 SV=2	H4C1	1	3.87738e-17	153.23	K(1)TVTAMDVVYALK(1)R	3	-0.75923	21	0.556	0.541	0.548	1.342	1.293	1.298
Cellular Component	GO:0032993	3	protein-DNA complex	0.0894431	P62805	78	1.846	Up	1.73873e-05	K	Histone H4 OS=Homo sapiens OX=9606 GN=H4C1 PE=1 SV=2	H4C1	1	3.72767e-11	151.98	DAVTYTEHAK(1)R	2	0.33428	3	0.693	0.658	0.65	1.26	1.199	1.235
Cellular Component	GO:0032993	3	protein-DNA complex	0.0894431	P62805	17	1.611	Up	2.4396e-05	K	Histone H4 OS=Homo sapiens OX=9606 GN=H4C1 PE=1 SV=2	H4C1	1	1.37446e-45	190.24	GLGK(1)GGAK(1)R	2	-1.3239	136	0.728	0.747	0.73	1.202	1.136	1.215
Cellular Component	GO:0032993	3	protein-DNA complex	0.0894431	Q96KK5	37	1.556	Up	0.00027896	K	Histone H2A type 1-H OS=Homo sapiens OX=9606 GN=HIST1H2AH PE=1 SV=3	HIST1H2AH	1	0.012122	96.311	K(1)GNYAER	2	0.80708	1	0.728	0.743	0.79	1.238	1.142	1.138
Cellular Component	GO:0032993	3	protein-DNA complex	0.0894431	Q96KK5	96	1.532	Up	0.000135907	K	Histone H2A type 1-H OS=Homo sapiens OX=9606 GN=HIST1H2AH PE=1 SV=3	HIST1H2AH	1	3.40253e-08	141.58	NDEELNK(1)LLGK	2	-0.23047	2	0.728	0.792	0.764	1.153	1.204	1.141
Cellular Component	GO:0032993	3	protein-DNA complex	0.0894431	Q96KK5	126	1.639	Up	7.7928e-05	K	Histone H2A type 1-H OS=Homo sapiens OX=9606 GN=HIST1H2AH PE=1 SV=3	HIST1H2AH	1	0.00072571	91.318	TESHHK(1)AK	3	0.69454	6	0.726	0.693	0.76	1.222	1.176	1.174
Cellular Component	GO:0032993	3	protein-DNA complex	0.0894431	P27694	163	2.076	Up	1.81648e-05	K	Replication protein A 70 kDa DNA-binding subunit OS=Homo sapiens OX=9606 GN=RPA1 PE=1 SV=2	RPA1	1	9.99335e-08	143.97	AYGASK(1)TFGK	3	1.1683	2	0.616	0.618	0.6	1.341	1.243	1.224
Cellular Component	GO:0032993	3	protein-DNA complex	0.0894431	Q71DI3	19	1.533	Up	0.034541	K	Histone H3.2 OS=Homo sapiens OX=9606 GN=HIST2H3A PE=1 SV=3	HIST2H3A	1	2.45577e-18	167.09	STGGK(1)APRK(1)QLATK(1)AAR	2	0.22427	41	0.669	0.886	0.726	1.238	0.937	1.322
Cellular Component	GO:0032993	3	protein-DNA complex	0.0894431	Q71DI3	10	1.777	Up	3.3362e-06	K	Histone H3.2 OS=Homo sapiens OX=9606 GN=HIST2H3A PE=1 SV=3	HIST2H3A	1	0.00024356	111.61	QTARK(1)STGGK(1)APR	2	0.94869	19	0.696	0.688	0.673	1.253	1.186	1.216
Cellular Component	GO:0032993	3	protein-DNA complex	0.0894431	P0C0S5	8	2.197	Up	4.9094e-07	K	Histone H2A.Z OS=Homo sapiens OX=9606 GN=H2AZ1 PE=1 SV=2	H2AZ1	1	2.41356e-07	111.64	AGK(1)DSGK(1)AK(1)TK	2	0.79948	12	0.591	0.582	0.583	1.323	1.257	1.278
Cellular Component	GO:0032993	3	protein-DNA complex	0.0894431	P0C0S5	12	2.225	Up	3.9617e-07	K	Histone H2A.Z OS=Homo sapiens OX=9606 GN=H2AZ1 PE=1 SV=2	H2AZ1	1	2.41356e-07	111.64	AGK(1)DSGK(1)AK(1)TK	2	0.79948	10	0.585	0.579	0.575	1.326	1.264	1.279
Cellular Component	GO:0032993	3	protein-DNA complex	0.0894431	P0C0S5	5	1.669	Up	5.8561e-05	K	Histone H2A.Z OS=Homo sapiens OX=9606 GN=H2AZ1 PE=1 SV=2	H2AZ1	1	2.41356e-07	111.64	AGGK(1)AGK(1)DSGK(1)AK(1)TK	2	0.11281	10	0.749	0.714	0.689	1.227	1.164	1.201
Cellular Component	GO:0032993	3	protein-DNA complex	0.0894431	P0C0S5	14	2.729	Up	2.1717e-06	K	Histone H2A.Z OS=Homo sapiens OX=9606 GN=H2AZ1 PE=1 SV=2	H2AZ1	1	2.41356e-07	106.57	AGK(1)DSGK(1)AK(1)TK	2	0.79948	4	0.511	0.491	0.48	1.402	1.295	1.348
Cellular Component	GO:0032993	3	protein-DNA complex	0.0894431	Q71UI9	8	1.776	Up	7.1996e-08	K	Histone H2A.V OS=Homo sapiens OX=9606 GN=H2AFV PE=1 SV=3	H2AFV	1	5.25348e-06	111.64	AGK(1)DSGK(1)AK(1)AK	2	0.56256	10	0.682	0.683	0.692	1.231	1.214	1.209
Cellular Component	GO:0032993	3	protein-DNA complex	0.0894431	Q71UI9	12	1.771	Up	4.7604e-08	K	Histone H2A.V OS=Homo sapiens OX=9606 GN=H2AFV PE=1 SV=3	H2AFV	1	5.25348e-06	111.64	AGK(1)DSGK(1)AK(1)AK	2	0.56256	8	0.684	0.688	0.689	1.228	1.219	1.203
Cellular Component	GO:0032993	3	protein-DNA complex	0.0894431	Q71UI9	14	1.84	Up	6.056e-07	K	Histone H2A.V OS=Homo sapiens OX=9606 GN=H2AFV PE=1 SV=3	H2AFV	1	0.00142022	96.464	AGK(1)DSGK(1)AK(1)AK	2	0.56256	2	0.675	0.674	0.655	1.23	1.211	1.247
Cellular Component	GO:1990023	12	mitotic spindle midzone	0.0401935	O00423	83	2.138	Up	3.0697e-06	K	Echinoderm microtubule-associated protein-like 1 OS=Homo sapiens OX=9606 GN=EML1 PE=1 SV=3	EML1	1	0.00127687	54.898	GPTK(1)ARPLMQTLPLR	3	3.2905	1	0.583	0.587	0.621	1.249	1.309	1.272
Cellular Component	GO:1990023	12	mitotic spindle midzone	0.0401935	Q14247	161	1.788	Up	3.79e-05	K	Src substrate cortactin OS=Homo sapiens OX=9606 GN=CTTN PE=1 SV=2	CTTN	1	5.64477e-17	133.78	DYSSGFGGK(1)YGVQADR	2	0.1629	2	0.677	0.659	0.712	1.252	1.23	1.179
Cellular Component	GO:1990023	12	mitotic spindle midzone	0.0401935	Q14247	198	1.588	Up	0.00024373	K	Src substrate cortactin OS=Homo sapiens OX=9606 GN=CTTN PE=1 SV=2	CTTN	1	6.55628e-07	113.24	GFGGK(1)YGIDK	3	-0.15514	2	0.734	0.77	0.724	1.251	1.119	1.169
Cellular Component	GO:0031594	3	neuromuscular junction	0.250745	Q15063	676	1.528	Up	0.00066247	K	Periostin OS=Homo sapiens OX=9606 GN=POSTN PE=1 SV=2	POSTN	1	0.00277252	88.596	IITK(1)VVEPK	2	-0.2033	1	0.802	0.784	0.702	1.127	1.19	1.178
Cellular Component	GO:0031594	3	neuromuscular junction	0.250745	P35580	1782	1.618	Up	0.00133836	K	Myosin-10 OS=Homo sapiens OX=9606 GN=MYH10 PE=1 SV=3	MYH10	1	0.000848405	90.614	SAAQK(1)SDNAR	2	-0.18483	1	0.811	0.675	0.713	1.145	1.249	1.164
Cellular Component	GO:0005578	5	proteinaceous extracellular matrix	0.00898905	P15692	149	1.52	Up	0.0183197	K	Vascular endothelial growth factor A OS=Homo sapiens OX=9606 GN=VEGFA PE=1 SV=2	VEGFA	1	0.0158118	68.016	GK(1)GK(1)GQK(1)R	3	0.20842	1	0.619	0.836	0.835	1.054	1.197	1.23
Cellular Component	GO:0005578	5	proteinaceous extracellular matrix	0.00898905	P15692	147	1.52	Up	0.0183197	K	Vascular endothelial growth factor A OS=Homo sapiens OX=9606 GN=VEGFA PE=1 SV=2	VEGFA	1	0.0158118	68.016	GK(1)GK(1)GQK(1)R	3	0.20842	1	0.619	0.836	0.835	1.054	1.197	1.23
Cellular Component	GO:0005578	5	proteinaceous extracellular matrix	0.00898905	P15692	152	1.52	Up	0.0183197	K	Vascular endothelial growth factor A OS=Homo sapiens OX=9606 GN=VEGFA PE=1 SV=2	VEGFA	1	0.0158118	68.016	GK(1)GK(1)GQK(1)R	3	0.20842	1	0.619	0.836	0.835	1.054	1.197	1.23
Cellular Component	GO:0005578	5	proteinaceous extracellular matrix	0.00898905	Q15063	676	1.528	Up	0.00066247	K	Periostin OS=Homo sapiens OX=9606 GN=POSTN PE=1 SV=2	POSTN	1	0.00277252	88.596	IITK(1)VVEPK	2	-0.2033	1	0.802	0.784	0.702	1.127	1.19	1.178
Cellular Component	GO:0005578	5	proteinaceous extracellular matrix	0.00898905	P23229	144	3.768	Up	1.57151e-05	K	Integrin alpha-6 OS=Homo sapiens OX=9606 GN=ITGA6 PE=1 SV=5	ITGA6	1	3.1719e-06	130.01	QHVNTK(1)QESR	2	1.0391	2	0.354	0.398	0.382	1.474	1.325	1.474
Cellular Component	GO:0005578	5	proteinaceous extracellular matrix	0.00898905	P23229	594	2.852	Up	0.0097615	K	Integrin alpha-6 OS=Homo sapiens OX=9606 GN=ITGA6 PE=1 SV=5	ITGA6	1	0.0014851	102.53	YTQELTLK(1)R	2	0.55207	2	0.382	0.524	0.521	1.331	1.345	1.394
Cellular Component	GO:0005578	5	proteinaceous extracellular matrix	0.00898905	O75487	44	1.652	Up	4.6607e-06	K	Glypican-4 OS=Homo sapiens OX=9606 GN=GPC4 PE=1 SV=4	GPC4	1	1.65724e-10	118.72	GFNK(1)NDAPLHEINGDHLK	4	0.22408	2	0.727	0.708	0.733	1.228	1.179	1.174
Cellular Component	GO:0005578	5	proteinaceous extracellular matrix	0.00898905	P24043	3092	1.918	Up	1.50302e-05	K	Laminin subunit alpha-2 OS=Homo sapiens OX=9606 GN=LAMA2 PE=1 SV=4	LAMA2	1	0.0350388	67.385	GCIRSLK(1)LTK	2	3.4243	1	0.661	0.626	0.658	1.283	1.221	1.227
Cellular Component	GO:0005578	5	proteinaceous extracellular matrix	0.00898905	Q16787	2135	1.622	Up	3.461e-06	K	Laminin subunit alpha-3 OS=Homo sapiens OX=9606 GN=LAMA3 PE=1 SV=2	LAMA3	1	0.000133898	89.507	SAGK(1)TSLVEEAEK	2	-0.15811	2	0.721	0.727	0.746	1.166	1.178	1.214
Cellular Component	GO:0005578	5	proteinaceous extracellular matrix	0.00898905	P02458	1444	3.469	Up	1.93387e-05	K	Collagen alpha-1(II) chain OS=Homo sapiens OX=9606 GN=COL2A1 PE=1 SV=3	COL2A1	1	0.014601	68.915	HTGK(1)WGK	3	-0.79413	1	0.434	0.395	0.388	1.483	1.302	1.437
Molecular Function	GO:0042562	3	hormone binding	0.303363	P02766	96	4.64	Up	1.0218e-07	K	Transthyretin OS=Homo sapiens OX=9606 GN=TTR PE=1 SV=1	TTR	1	9.62145e-21	174.24	VEIDTK(1)SYWK	2	0.52001	2	0.318	0.326	0.304	1.477	1.456	1.466
Molecular Function	GO:0042562	3	hormone binding	0.303363	P47895	423	1.504	Up	1.81114e-05	K	Aldehyde dehydrogenase family 1 member A3 OS=Homo sapiens OX=9606 GN=ALDH1A3 PE=1 SV=2	ALDH1A3	1	3.01099e-05	135.99	FK(1)SIEEVIK	2	-0.13248	1	0.763	0.772	0.78	1.196	1.14	1.145
Molecular Function	GO:0003756	6	protein disulfide isomerase activity	0.207279	Q15084	368	1.539	Up	1.70414e-05	K	Protein disulfide-isomerase A6 OS=Homo sapiens OX=9606 GN=PDIA6 PE=1 SV=1	PDIA6	1	0.0107878	97.798	MK(1)FALLK	2	-0.72228	1	0.752	0.78	0.746	1.188	1.148	1.169
Molecular Function	GO:0003756	6	protein disulfide isomerase activity	0.207279	P30101	494	1.633	Up	0.00061616	K	Protein disulfide-isomerase A3 OS=Homo sapiens OX=9606 GN=PDIA3 PE=1 SV=4	PDIA3	1	1.11552e-22	158.91	EATNPPVIQEEK(1)PK	2	-0.21724	3	0.713	0.703	0.767	1.119	1.287	1.158
Molecular Function	GO:0000217	6	DNA secondary structure binding	0.0149761	P26583	3	2.956	Up	1.481e-06	K	High mobility group protein B2 OS=Homo sapiens OX=9606 GN=HMGB2 PE=1 SV=2	HMGB2	0.999989	0.00434355	72.928	GK(1)GDPNKPR	3	-2.3564	2	0.457	0.487	0.444	1.378	1.343	1.382
Molecular Function	GO:0000217	6	DNA secondary structure binding	0.0149761	P09429	90	1.761	Up	0.000121985	K	High mobility group protein B1 OS=Homo sapiens OX=9606 GN=HMGB1 PE=1 SV=3	HMGB1	1	0.014499	80.688	FK(1)DPNAPK	2	-0.291	2	0.677	0.691	0.704	1.289	1.223	1.136
Molecular Function	GO:0000217	6	DNA secondary structure binding	0.0149761	O15347	161	1.908	Up	1.7514e-05	K	High mobility group protein B3 OS=Homo sapiens OX=9606 GN=HMGB3 PE=1 SV=4	HMGB3	1	0.0120205	83.862	DVADYK(1)SK	2	-0.43322	1	0.626	0.65	0.676	1.259	1.256	1.209
Molecular Function	GO:0005216	7	ion channel activity	0.255233	Q9Y696	146	1.747	Up	0.000158095	K	Chloride intracellular channel protein 4 OS=Homo sapiens OX=9606 GN=CLIC4 PE=1 SV=4	CLIC4	1	0.00711757	91.867	GLLK(1)TLQK	2	0.55617	1	0.693	0.685	0.705	1.273	1.121	1.245
Molecular Function	GO:0005216	7	ion channel activity	0.255233	P21796	61	1.877	Up	2.673e-06	K	Voltage-dependent anion-selective channel protein 1 OS=Homo sapiens OX=9606 GN=VDAC1 PE=1 SV=2	VDAC1	1	0.00011548	117.25	VTGSLETK(1)YR	3	1.0352	3	0.663	0.636	0.677	1.244	1.244	1.221
Molecular Function	GO:0005216	7	ion channel activity	0.255233	P21796	20	1.506	Up	6.0692e-05	K	Voltage-dependent anion-selective channel protein 1 OS=Homo sapiens OX=9606 GN=VDAC1 PE=1 SV=2	VDAC1	1	5.63016e-11	131.66	DVFTK(1)GYGFGLIK	2	0.76596	2	0.765	0.794	0.754	1.198	1.157	1.128
Molecular Function	GO:0051087	4	chaperone binding	0.14053	P53634	162	3.108	Up	0.00042277	K	Dipeptidyl peptidase 1 OS=Homo sapiens OX=9606 GN=CTSC PE=1 SV=2	CTSC	1	0.0014128	98.156	NSQEK(1)YSNR	2	-0.30772	1	0.369	0.439	0.525	1.453	1.385	1.305
Molecular Function	GO:0051087	4	chaperone binding	0.14053	P31948	169	1.725	Up	0.00034403	K	Stress-induced-phosphoprotein 1 OS=Homo sapiens OX=9606 GN=STIP1 PE=1 SV=1	STIP1	0.99982	0.000892419	63.185	NKPSDLGTK(1)LQDPR	3	-3.3261	1	0.667	0.685	0.75	1.286	1.154	1.185
Molecular Function	GO:0051087	4	chaperone binding	0.14053	P31948	325	1.713	Up	3.6441e-05	K	Stress-induced-phosphoprotein 1 OS=Homo sapiens OX=9606 GN=STIP1 PE=1 SV=1	STIP1	1	0.0105559	44.807	DAIHFYNK(1)SLAEHR	3	0.066022	1	0.731	0.681	0.7	1.215	1.169	1.234
Molecular Function	GO:0051087	4	chaperone binding	0.14053	P25685	35	1.664	Up	0.000144468	K	DnaJ homolog subfamily B member 1 OS=Homo sapiens OX=9606 GN=DNAJB1 PE=1 SV=4	DNAJB1	1	0.0161937	67.032	YHPDK(1)NK	3	3.4717	2	0.753	0.692	0.711	1.223	1.134	1.231
Molecular Function	GO:0051087	4	chaperone binding	0.14053	P25685	3	1.65	Up	0.000140274	K	DnaJ homolog subfamily B member 1 OS=Homo sapiens OX=9606 GN=DNAJB1 PE=1 SV=4	DNAJB1	1	3.11133e-07	121.45	GK(1)DYYQTLGLAR	2	1.5419	1	0.756	0.693	0.722	1.25	1.15	1.182
Molecular Function	GO:0051087	4	chaperone binding	0.14053	Q9Y4L1	991	1.814	Up	0.00105528	K	Hypoxia up-regulated protein 1 OS=Homo sapiens OX=9606 GN=HYOU1 PE=1 SV=1	HYOU1	1	0.0356549	68.657	EQSTGQK(1)R	2	-0.21595	1	0.705	0.586	0.734	1.194	1.25	1.23
Molecular Function	GO:0051087	4	chaperone binding	0.14053	Q9Y4L1	537	1.679	Up	0.00189553	K	Hypoxia up-regulated protein 1 OS=Homo sapiens OX=9606 GN=HYOU1 PE=1 SV=1	HYOU1	1	2.35366e-05	105.65	KYPDYESK(1)GIK	3	1.7955	1	0.728	0.644	0.773	1.297	1.201	1.103
Molecular Function	GO:0051087	4	chaperone binding	0.14053	P11021	553	1.584	Up	0.00051646	K	Endoplasmic reticulum chaperone BiP OS=Homo sapiens OX=9606 GN=HSPA5 PE=1 SV=2	HSPA5	1	0.0198462	68.915	FAEEDK(1)K	3	0.25072	1	0.739	0.758	0.737	1.273	1.094	1.171
Molecular Function	GO:0051087	4	chaperone binding	0.14053	P11021	352	1.593	Up	7.6558e-05	K	Endoplasmic reticulum chaperone BiP OS=Homo sapiens OX=9606 GN=HSPA5 PE=1 SV=2	HSPA5	1	0.000769989	104.22	VLEDSDLK(1)K	3	2.7364	2	0.731	0.73	0.76	1.123	1.214	1.2
Molecular Function	GO:0001012	8	RNA polymerase II regulatory region DNA binding	0.098819	P07910	176	1.934	Up	2.1133e-05	K	Heterogeneous nuclear ribonucleoproteins C1/C2 OS=Homo sapiens OX=9606 GN=HNRNPC PE=1 SV=4	HNRNPC	1	4.37087e-06	137.4	SGFNSK(1)SGQR	2	0.17987	2	0.61	0.654	0.667	1.26	1.219	1.256
Molecular Function	GO:0001012	8	RNA polymerase II regulatory region DNA binding	0.098819	Q09472	1769	4.035	Up	2.2499e-07	K	Histone acetyltransferase p300 OS=Homo sapiens OX=9606 GN=EP300 PE=1 SV=2	EP300	1	1.89332e-49	208.56	VVQHTK(1)GCK(1)R	2	0.47995	5	0.357	0.351	0.363	1.501	1.405	1.415
Molecular Function	GO:0001012	8	RNA polymerase II regulatory region DNA binding	0.098819	Q09472	1772	11.928	Up	3.2215e-07	K	Histone acetyltransferase p300 OS=Homo sapiens OX=9606 GN=EP300 PE=1 SV=2	EP300	1	1.89332e-49	208.56	VVQHTK(1)GCK(1)R	2	0.47995	3	0.123	0.136	0.141	1.65	1.565	1.556
Molecular Function	GO:0001012	8	RNA polymerase II regulatory region DNA binding	0.098819	Q09472	1762	7.585	Up	0.00119748	K	Histone acetyltransferase p300 OS=Homo sapiens OX=9606 GN=EP300 PE=1 SV=2	EP300	1	2.32223e-16	145.52	NANCSLPSCQK(1)MK(1)R	2	-1.3586	2	0.201	0.229	0.18	1.533	1.572	1.522
Molecular Function	GO:0001012	8	RNA polymerase II regulatory region DNA binding	0.098819	Q09472	1774	3.958	Up	0.0092049	K	Histone acetyltransferase p300 OS=Homo sapiens OX=9606 GN=EP300 PE=1 SV=2	EP300	1	0.000167046	115.33	K(1)TNGGCPICK	3	-1.4801	4	0.287	0.344	0.456	1.437	1.433	1.432
Molecular Function	GO:0001012	8	RNA polymerase II regulatory region DNA binding	0.098819	Q09472	1704	1.891	Up	5.0177e-07	K	Histone acetyltransferase p300 OS=Homo sapiens OX=9606 GN=EP300 PE=1 SV=2	EP300	1	2.47609e-10	80.688	NHDHK(1)MEK(1)LGLGLDDESNNQQAAATQSPGDSR	4	4.3749	6	0.642	0.664	0.659	1.234	1.257	1.224
Molecular Function	GO:0001012	8	RNA polymerase II regulatory region DNA binding	0.098819	Q09472	1760	1.885	Up	3.5127e-06	K	Histone acetyltransferase p300 OS=Homo sapiens OX=9606 GN=EP300 PE=1 SV=2	EP300	1	2.32223e-16	145.52	NANCSLPSCQK(1)MK(1)R	2	-1.3586	5	0.642	0.648	0.679	1.223	1.266	1.222
Molecular Function	GO:0001012	8	RNA polymerase II regulatory region DNA binding	0.098819	Q8NI51	335	1.578	Up	0.00022197	K	Transcriptional repressor CTCFL OS=Homo sapiens OX=9606 GN=CTCFL PE=1 SV=2	CTCFL	0.999974	0.0106656	55.314	YK(1)HTHEKPFK	4	1.7238	1	0.752	0.764	0.724	1.237	1.189	1.108
Molecular Function	GO:0001012	8	RNA polymerase II regulatory region DNA binding	0.098819	Q9UQR1	211	2.294	Up	2.0082e-05	K	Zinc finger protein 148 OS=Homo sapiens OX=9606 GN=ZNF148 PE=1 SV=2	ZNF148	1	0.0270936	63.816	FIQK(1)YLLQR	2	2.8693	1	0.547	0.593	0.555	1.247	1.282	1.36
Molecular Function	GO:0001012	8	RNA polymerase II regulatory region DNA binding	0.098819	P0C0S5	8	2.197	Up	4.9094e-07	K	Histone H2A.Z OS=Homo sapiens OX=9606 GN=H2AZ1 PE=1 SV=2	H2AZ1	1	2.41356e-07	111.64	AGK(1)DSGK(1)AK(1)TK	2	0.79948	12	0.591	0.582	0.583	1.323	1.257	1.278
Molecular Function	GO:0001012	8	RNA polymerase II regulatory region DNA binding	0.098819	P0C0S5	12	2.225	Up	3.9617e-07	K	Histone H2A.Z OS=Homo sapiens OX=9606 GN=H2AZ1 PE=1 SV=2	H2AZ1	1	2.41356e-07	111.64	AGK(1)DSGK(1)AK(1)TK	2	0.79948	10	0.585	0.579	0.575	1.326	1.264	1.279
Molecular Function	GO:0001012	8	RNA polymerase II regulatory region DNA binding	0.098819	P0C0S5	5	1.669	Up	5.8561e-05	K	Histone H2A.Z OS=Homo sapiens OX=9606 GN=H2AZ1 PE=1 SV=2	H2AZ1	1	2.41356e-07	111.64	AGGK(1)AGK(1)DSGK(1)AK(1)TK	2	0.11281	10	0.749	0.714	0.689	1.227	1.164	1.201
Molecular Function	GO:0001012	8	RNA polymerase II regulatory region DNA binding	0.098819	P0C0S5	14	2.729	Up	2.1717e-06	K	Histone H2A.Z OS=Homo sapiens OX=9606 GN=H2AZ1 PE=1 SV=2	H2AZ1	1	2.41356e-07	106.57	AGK(1)DSGK(1)AK(1)TK	2	0.79948	4	0.511	0.491	0.48	1.402	1.295	1.348
Molecular Function	GO:0001012	8	RNA polymerase II regulatory region DNA binding	0.098819	O43707	779	1.506	Up	4.621e-06	K	Alpha-actinin-4 OS=Homo sapiens OX=9606 GN=ACTN4 PE=1 SV=2	ACTN4	1	2.1119e-07	92.098	ASFNHFDK(1)DHGGALGPEEFK	4	-0.48137	1	0.769	0.755	0.788	1.156	1.148	1.177
Molecular Function	GO:0001012	8	RNA polymerase II regulatory region DNA binding	0.098819	O94916	259	7.661	Up	1.5626e-06	K	Nuclear factor of activated T-cells 5 OS=Homo sapiens OX=9606 GN=NFAT5 PE=1 SV=1	NFAT5	1	0.038802	41.695	AGNGTLENQK(1)GTGVK(1)K	3	2.9694	1	0.192	0.214	0.198	1.463	1.681	1.483
Molecular Function	GO:0001012	8	RNA polymerase II regulatory region DNA binding	0.098819	O94916	264	7.661	Up	1.5626e-06	K	Nuclear factor of activated T-cells 5 OS=Homo sapiens OX=9606 GN=NFAT5 PE=1 SV=1	NFAT5	1	0.038802	41.695	AGNGTLENQK(1)GTGVK(1)K	3	2.9694	1	0.192	0.214	0.198	1.463	1.681	1.483
Molecular Function	GO:0016705	4	oxidoreductase activity, acting on paired donors, with incorporation or reduction of molecular oxygen	0.207279	Q12797	336	1.771	Up	0.0099388	K	Aspartyl/asparaginyl beta-hydroxylase OS=Homo sapiens OX=9606 GN=ASPH PE=1 SV=3	ASPH	1	0.0197409	87.476	LLNK(1)FDK	2	2.2137	1	0.759	0.622	0.682	1.221	1.227	1.206
Molecular Function	GO:0016705	4	oxidoreductase activity, acting on paired donors, with incorporation or reduction of molecular oxygen	0.207279	Q04828	207	2.087	Up	2.0691e-05	K	Aldo-keto reductase family 1 member C1 OS=Homo sapiens OX=9606 GN=AKR1C1 PE=1 SV=1	AKR1C1	1	0.00529129	96.342	LLDFCK(1)SK	3	0.41295	2	0.638	0.613	0.575	1.289	1.244	1.277
Molecular Function	GO:0016705	4	oxidoreductase activity, acting on paired donors, with incorporation or reduction of molecular oxygen	0.207279	Q04828	270	2.181	Up	2.1767e-06	K	Aldo-keto reductase family 1 member C1 OS=Homo sapiens OX=9606 GN=AKR1C1 PE=1 SV=1	AKR1C1	1	1.43268e-36	194.86	GVVVLAK(1)SYNEQR	2	-0.46789	2	0.574	0.577	0.614	1.299	1.284	1.267
Molecular Function	GO:0017124	5	SH3 domain binding	0.303363	Q9UPX8	1174	1.904	Up	0.00047943	K	SH3 and multiple ankyrin repeat domains protein 2 OS=Homo sapiens OX=9606 GN=SHANK2 PE=1 SV=3	SHANK2	1	0.0255254	57.281	MK(1)PIIHK	3	-3.76	1	0.718	0.65	0.589	1.296	1.239	1.192
Molecular Function	GO:0017124	5	SH3 domain binding	0.303363	Q14185	641	2.953	Up	0.001995	K	Dedicator of cytokinesis protein 1 OS=Homo sapiens OX=9606 GN=DOCK1 PE=1 SV=2	DOCK1	1	0.0385614	45.28	QLMK(1)VDGGEVVK	2	-2.6314	1	0.509	0.442	0.439	1.378	1.372	1.355
Molecular Function	GO:0004872	3	receptor activity	0.0106705	Q9NRS4	249	1.837	Up	2.0037e-05	K	Transmembrane protease serine 4 OS=Homo sapiens OX=9606 GN=TMPRSS4 PE=1 SV=2	TMPRSS4	1	0.00432063	74.173	K(1)HTDVFNWK	3	-0.09216	1	0.682	0.664	0.659	1.182	1.219	1.283
Molecular Function	GO:0004872	3	receptor activity	0.0106705	P18564	548	1.991	Up	0.0032991	K	Integrin beta-6 OS=Homo sapiens OX=9606 GN=ITGB6 PE=1 SV=2	ITGB6	1	9.92231e-07	77.037	HK(1)GLLCGGNGDCDCGECVCR	3	-0.47256	1	0.5	0.688	0.699	1.2	1.299	1.258
Molecular Function	GO:0004872	3	receptor activity	0.0106705	P13726	233	2.168	Up	0.00033987	K	Tissue factor OS=Homo sapiens OX=9606 GN=F3 PE=1 SV=1	F3	1	2.77667e-05	95.57	K(1)STDSPVECMGQEK	3	2.065	1	0.588	0.527	0.659	1.34	1.252	1.254
Molecular Function	GO:0004872	3	receptor activity	0.0106705	O75197	526	6.771	Up	0.0093419	K	Low-density lipoprotein receptor-related protein 5 OS=Homo sapiens OX=9606 GN=LRP5 PE=1 SV=2	LRP5	1	0.0142367	76.073	TDK(1)IEVINVDGTK	2	2.3659	1	0.196	0.27	0.207	1.517	0.67	2.37
Molecular Function	GO:0004872	3	receptor activity	0.0106705	O75487	44	1.652	Up	4.6607e-06	K	Glypican-4 OS=Homo sapiens OX=9606 GN=GPC4 PE=1 SV=4	GPC4	1	1.65724e-10	118.72	GFNK(1)NDAPLHEINGDHLK	4	0.22408	2	0.727	0.708	0.733	1.228	1.179	1.174
Molecular Function	GO:0004872	3	receptor activity	0.0106705	Q4VCS5	585	2.51	Up	9.7814e-08	K	Angiomotin OS=Homo sapiens OX=9606 GN=AMOT PE=1 SV=1	AMOT	1	0.0447623	40.941	DQALSNAQAK(1)VVK	2	0.43599	1	0.537	0.526	0.519	1.311	1.317	1.343
Molecular Function	GO:0004872	3	receptor activity	0.0106705	P22794	170	2.522	Up	4.4941e-05	K	Protein EVI2A OS=Homo sapiens OX=9606 GN=EVI2A PE=2 SV=2	EVI2A	1	0.0125926	48.284	SK(1)QVGK(1)RQPR	3	3.0827	2	0.525	0.495	0.558	1.346	1.397	1.237
Molecular Function	GO:0004872	3	receptor activity	0.0106705	P22794	174	2.522	Up	4.4941e-05	K	Protein EVI2A OS=Homo sapiens OX=9606 GN=EVI2A PE=2 SV=2	EVI2A	1	0.0125926	48.284	SK(1)QVGK(1)RQPR	3	3.0827	2	0.525	0.495	0.558	1.346	1.397	1.237
Molecular Function	GO:0004872	3	receptor activity	0.0106705	Q8NGZ5	301	1.976	Up	3.3313e-06	K	Olfactory receptor 2G2 OS=Homo sapiens OX=9606 GN=OR2G2 PE=3 SV=1	OR2G2	1	0.0393046	75.738	EVK(1)GALK	2	-0.3398	1	0.658	0.629	0.616	1.28	1.24	1.24
Molecular Function	GO:0004872	3	receptor activity	0.0106705	P17301	261	4.97	Up	7.7205e-05	K	Integrin alpha-2 OS=Homo sapiens OX=9606 GN=ITGA2 PE=1 SV=1	ITGA2	1	5.75495e-08	138.89	K(1)YAYSAASGGR	2	-0.52946	1	0.253	0.307	0.334	1.631	1.406	1.406
Molecular Function	GO:0004872	3	receptor activity	0.0106705	P08174	161	4.927	Up	1.8954e-06	K	Complement decay-accelerating factor OS=Homo sapiens OX=9606 GN=CD55 PE=1 SV=4	CD55	1	0.000511591	92.611	K(1)SCPNPGEIR	2	-0.92109	3	0.289	0.285	0.326	1.505	1.493	1.436
Molecular Function	GO:0031491	4	nucleosome binding	0.173283	P07910	176	1.934	Up	2.1133e-05	K	Heterogeneous nuclear ribonucleoproteins C1/C2 OS=Homo sapiens OX=9606 GN=HNRNPC PE=1 SV=4	HNRNPC	1	4.37087e-06	137.4	SGFNSK(1)SGQR	2	0.17987	2	0.61	0.654	0.667	1.26	1.219	1.256
Molecular Function	GO:0031491	4	nucleosome binding	0.173283	P0C0S5	8	2.197	Up	4.9094e-07	K	Histone H2A.Z OS=Homo sapiens OX=9606 GN=H2AZ1 PE=1 SV=2	H2AZ1	1	2.41356e-07	111.64	AGK(1)DSGK(1)AK(1)TK	2	0.79948	12	0.591	0.582	0.583	1.323	1.257	1.278
Molecular Function	GO:0031491	4	nucleosome binding	0.173283	P0C0S5	12	2.225	Up	3.9617e-07	K	Histone H2A.Z OS=Homo sapiens OX=9606 GN=H2AZ1 PE=1 SV=2	H2AZ1	1	2.41356e-07	111.64	AGK(1)DSGK(1)AK(1)TK	2	0.79948	10	0.585	0.579	0.575	1.326	1.264	1.279
Molecular Function	GO:0031491	4	nucleosome binding	0.173283	P0C0S5	5	1.669	Up	5.8561e-05	K	Histone H2A.Z OS=Homo sapiens OX=9606 GN=H2AZ1 PE=1 SV=2	H2AZ1	1	2.41356e-07	111.64	AGGK(1)AGK(1)DSGK(1)AK(1)TK	2	0.11281	10	0.749	0.714	0.689	1.227	1.164	1.201
Molecular Function	GO:0031491	4	nucleosome binding	0.173283	P0C0S5	14	2.729	Up	2.1717e-06	K	Histone H2A.Z OS=Homo sapiens OX=9606 GN=H2AZ1 PE=1 SV=2	H2AZ1	1	2.41356e-07	106.57	AGK(1)DSGK(1)AK(1)TK	2	0.79948	4	0.511	0.491	0.48	1.402	1.295	1.348
Molecular Function	GO:0031491	4	nucleosome binding	0.173283	Q96T88	546	1.987	Up	0.0040585	K	E3 ubiquitin-protein ligase UHRF1 OS=Homo sapiens OX=9606 GN=UHRF1 PE=1 SV=1	UHRF1	1	0.000183326	96.059	NSK(1)YAPAEGNR	2	0.1761	1	0.675	0.581	0.638	1.244	1.265	1.255
Molecular Function	GO:0017025	5	TBP-class protein binding	0.255233	P62333	206	2.136	Up	0.00048094	K	26S proteasome regulatory subunit 10B OS=Homo sapiens OX=9606 GN=PSMC6 PE=1 SV=1	PSMC6	1	0.000150997	83.37	VVSSSIVDK(1)YIGESAR	3	-0.50553	1	0.626	0.649	0.518	1.227	1.325	1.278
Molecular Function	GO:0017025	5	TBP-class protein binding	0.255233	P62333	322	1.784	Up	0.040963	K	26S proteasome regulatory subunit 10B OS=Homo sapiens OX=9606 GN=PSMC6 PE=1 SV=1	PSMC6	1	3.68076e-07	92.39	IHAGPITK(1)HGEIDYEAIVK	4	0.89264	1	0.667	0.664	0.727	1.374	1.471	0.826
Molecular Function	GO:0017025	5	TBP-class protein binding	0.255233	P62195	330	2.306	Up	0.0105445	K	26S proteasome regulatory subunit 8 OS=Homo sapiens OX=9606 GN=PSMC5 PE=1 SV=1	PSMC5	1	0.006593	64.82	LDILK(1)IHSR	3	-0.7783	1	0.602	0.591	0.492	0.932	1.66	1.293
Molecular Function	GO:0050660	6	flavin adenine dinucleotide binding	0.310433	Q9Y2Z2	236	1.819	Up	1.5014e-06	K	Protein MTO1 homolog, mitochondrial OS=Homo sapiens OX=9606 GN=MTO1 PE=1 SV=2	MTO1	1	0.0374859	67.334	LK(1)TGTPPR	2	-1.5104	1	0.685	0.675	0.662	1.254	1.201	1.224
Molecular Function	GO:0050660	6	flavin adenine dinucleotide binding	0.310433	P31040	250	1.834	Up	3.6211e-05	K	Succinate dehydrogenase [ubiquinone] flavoprotein subunit, mitochondrial OS=Homo sapiens OX=9606 GN=SDHA PE=1 SV=2	SDHA	1	4.99908e-10	121.48	AK(1)NTVVATGGYGR	2	-0.32717	1	0.651	0.652	0.705	1.211	1.212	1.26
Molecular Function	GO:0050660	6	flavin adenine dinucleotide binding	0.310433	O95831	518	1.536	Up	0.00075992	K	Apoptosis-inducing factor 1, mitochondrial OS=Homo sapiens OX=9606 GN=AIFM1 PE=1 SV=1	AIFM1	1	5.47123e-15	123.42	ATAQDNPK(1)SATEQSGTGIR	3	1.6671	1	0.756	0.746	0.778	1.17	1.076	1.255
Molecular Function	GO:0035064	5	methylated histone binding	0.303363	P45973	91	1.882	Up	0.000176434	K	Chromobox protein homolog 5 OS=Homo sapiens OX=9606 GN=CBX5 PE=1 SV=1	CBX5	1	6.4636e-18	162.37	K(1)SNFSNSADDIK	2	-0.43997	1	0.616	0.7	0.656	1.302	1.23	1.179
Molecular Function	GO:0035064	5	methylated histone binding	0.303363	Q96T88	546	1.987	Up	0.0040585	K	E3 ubiquitin-protein ligase UHRF1 OS=Homo sapiens OX=9606 GN=UHRF1 PE=1 SV=1	UHRF1	1	0.000183326	96.059	NSK(1)YAPAEGNR	2	0.1761	1	0.675	0.581	0.638	1.244	1.265	1.255
Molecular Function	GO:0015026	5	coreceptor activity	0.0411098	O75197	526	6.771	Up	0.0093419	K	Low-density lipoprotein receptor-related protein 5 OS=Homo sapiens OX=9606 GN=LRP5 PE=1 SV=2	LRP5	1	0.0142367	76.073	TDK(1)IEVINVDGTK	2	2.3659	1	0.196	0.27	0.207	1.517	0.67	2.37
Molecular Function	GO:0015026	5	coreceptor activity	0.0411098	O75487	44	1.652	Up	4.6607e-06	K	Glypican-4 OS=Homo sapiens OX=9606 GN=GPC4 PE=1 SV=4	GPC4	1	1.65724e-10	118.72	GFNK(1)NDAPLHEINGDHLK	4	0.22408	2	0.727	0.708	0.733	1.228	1.179	1.174
Molecular Function	GO:0022803	4	passive transmembrane transporter activity	0.255233	Q9Y696	146	1.747	Up	0.000158095	K	Chloride intracellular channel protein 4 OS=Homo sapiens OX=9606 GN=CLIC4 PE=1 SV=4	CLIC4	1	0.00711757	91.867	GLLK(1)TLQK	2	0.55617	1	0.693	0.685	0.705	1.273	1.121	1.245
Molecular Function	GO:0022803	4	passive transmembrane transporter activity	0.255233	P21796	61	1.877	Up	2.673e-06	K	Voltage-dependent anion-selective channel protein 1 OS=Homo sapiens OX=9606 GN=VDAC1 PE=1 SV=2	VDAC1	1	0.00011548	117.25	VTGSLETK(1)YR	3	1.0352	3	0.663	0.636	0.677	1.244	1.244	1.221
Molecular Function	GO:0022803	4	passive transmembrane transporter activity	0.255233	P21796	20	1.506	Up	6.0692e-05	K	Voltage-dependent anion-selective channel protein 1 OS=Homo sapiens OX=9606 GN=VDAC1 PE=1 SV=2	VDAC1	1	5.63016e-11	131.66	DVFTK(1)GYGFGLIK	2	0.76596	2	0.765	0.794	0.754	1.198	1.157	1.128
Molecular Function	GO:0004888	5	transmembrane signaling receptor activity	0.0280224	P13726	233	2.168	Up	0.00033987	K	Tissue factor OS=Homo sapiens OX=9606 GN=F3 PE=1 SV=1	F3	1	2.77667e-05	95.57	K(1)STDSPVECMGQEK	3	2.065	1	0.588	0.527	0.659	1.34	1.252	1.254
Molecular Function	GO:0004888	5	transmembrane signaling receptor activity	0.0280224	O75197	526	6.771	Up	0.0093419	K	Low-density lipoprotein receptor-related protein 5 OS=Homo sapiens OX=9606 GN=LRP5 PE=1 SV=2	LRP5	1	0.0142367	76.073	TDK(1)IEVINVDGTK	2	2.3659	1	0.196	0.27	0.207	1.517	0.67	2.37
Molecular Function	GO:0004888	5	transmembrane signaling receptor activity	0.0280224	P22794	170	2.522	Up	4.4941e-05	K	Protein EVI2A OS=Homo sapiens OX=9606 GN=EVI2A PE=2 SV=2	EVI2A	1	0.0125926	48.284	SK(1)QVGK(1)RQPR	3	3.0827	2	0.525	0.495	0.558	1.346	1.397	1.237
Molecular Function	GO:0004888	5	transmembrane signaling receptor activity	0.0280224	P22794	174	2.522	Up	4.4941e-05	K	Protein EVI2A OS=Homo sapiens OX=9606 GN=EVI2A PE=2 SV=2	EVI2A	1	0.0125926	48.284	SK(1)QVGK(1)RQPR	3	3.0827	2	0.525	0.495	0.558	1.346	1.397	1.237
Molecular Function	GO:0004888	5	transmembrane signaling receptor activity	0.0280224	Q8NGZ5	301	1.976	Up	3.3313e-06	K	Olfactory receptor 2G2 OS=Homo sapiens OX=9606 GN=OR2G2 PE=3 SV=1	OR2G2	1	0.0393046	75.738	EVK(1)GALK	2	-0.3398	1	0.658	0.629	0.616	1.28	1.24	1.24
Molecular Function	GO:0004888	5	transmembrane signaling receptor activity	0.0280224	P17301	261	4.97	Up	7.7205e-05	K	Integrin alpha-2 OS=Homo sapiens OX=9606 GN=ITGA2 PE=1 SV=1	ITGA2	1	5.75495e-08	138.89	K(1)YAYSAASGGR	2	-0.52946	1	0.253	0.307	0.334	1.631	1.406	1.406
Molecular Function	GO:0050840	3	extracellular matrix binding	0.0634162	P15692	149	1.52	Up	0.0183197	K	Vascular endothelial growth factor A OS=Homo sapiens OX=9606 GN=VEGFA PE=1 SV=2	VEGFA	1	0.0158118	68.016	GK(1)GK(1)GQK(1)R	3	0.20842	1	0.619	0.836	0.835	1.054	1.197	1.23
Molecular Function	GO:0050840	3	extracellular matrix binding	0.0634162	P15692	147	1.52	Up	0.0183197	K	Vascular endothelial growth factor A OS=Homo sapiens OX=9606 GN=VEGFA PE=1 SV=2	VEGFA	1	0.0158118	68.016	GK(1)GK(1)GQK(1)R	3	0.20842	1	0.619	0.836	0.835	1.054	1.197	1.23
Molecular Function	GO:0050840	3	extracellular matrix binding	0.0634162	P15692	152	1.52	Up	0.0183197	K	Vascular endothelial growth factor A OS=Homo sapiens OX=9606 GN=VEGFA PE=1 SV=2	VEGFA	1	0.0158118	68.016	GK(1)GK(1)GQK(1)R	3	0.20842	1	0.619	0.836	0.835	1.054	1.197	1.23
Molecular Function	GO:0050840	3	extracellular matrix binding	0.0634162	P23229	144	3.768	Up	1.57151e-05	K	Integrin alpha-6 OS=Homo sapiens OX=9606 GN=ITGA6 PE=1 SV=5	ITGA6	1	3.1719e-06	130.01	QHVNTK(1)QESR	2	1.0391	2	0.354	0.398	0.382	1.474	1.325	1.474
Molecular Function	GO:0050840	3	extracellular matrix binding	0.0634162	P23229	594	2.852	Up	0.0097615	K	Integrin alpha-6 OS=Homo sapiens OX=9606 GN=ITGA6 PE=1 SV=5	ITGA6	1	0.0014851	102.53	YTQELTLK(1)R	2	0.55207	2	0.382	0.524	0.521	1.331	1.345	1.394
Molecular Function	GO:0050840	3	extracellular matrix binding	0.0634162	P17301	261	4.97	Up	7.7205e-05	K	Integrin alpha-2 OS=Homo sapiens OX=9606 GN=ITGA2 PE=1 SV=1	ITGA2	1	5.75495e-08	138.89	K(1)YAYSAASGGR	2	-0.52946	1	0.253	0.307	0.334	1.631	1.406	1.406
Molecular Function	GO:0001102	6	RNA polymerase II activating transcription factor binding	0.160478	Q09472	1769	4.035	Up	2.2499e-07	K	Histone acetyltransferase p300 OS=Homo sapiens OX=9606 GN=EP300 PE=1 SV=2	EP300	1	1.89332e-49	208.56	VVQHTK(1)GCK(1)R	2	0.47995	5	0.357	0.351	0.363	1.501	1.405	1.415
Molecular Function	GO:0001102	6	RNA polymerase II activating transcription factor binding	0.160478	Q09472	1772	11.928	Up	3.2215e-07	K	Histone acetyltransferase p300 OS=Homo sapiens OX=9606 GN=EP300 PE=1 SV=2	EP300	1	1.89332e-49	208.56	VVQHTK(1)GCK(1)R	2	0.47995	3	0.123	0.136	0.141	1.65	1.565	1.556
Molecular Function	GO:0001102	6	RNA polymerase II activating transcription factor binding	0.160478	Q09472	1762	7.585	Up	0.00119748	K	Histone acetyltransferase p300 OS=Homo sapiens OX=9606 GN=EP300 PE=1 SV=2	EP300	1	2.32223e-16	145.52	NANCSLPSCQK(1)MK(1)R	2	-1.3586	2	0.201	0.229	0.18	1.533	1.572	1.522
Molecular Function	GO:0001102	6	RNA polymerase II activating transcription factor binding	0.160478	Q09472	1774	3.958	Up	0.0092049	K	Histone acetyltransferase p300 OS=Homo sapiens OX=9606 GN=EP300 PE=1 SV=2	EP300	1	0.000167046	115.33	K(1)TNGGCPICK	3	-1.4801	4	0.287	0.344	0.456	1.437	1.433	1.432
Molecular Function	GO:0001102	6	RNA polymerase II activating transcription factor binding	0.160478	Q09472	1704	1.891	Up	5.0177e-07	K	Histone acetyltransferase p300 OS=Homo sapiens OX=9606 GN=EP300 PE=1 SV=2	EP300	1	2.47609e-10	80.688	NHDHK(1)MEK(1)LGLGLDDESNNQQAAATQSPGDSR	4	4.3749	6	0.642	0.664	0.659	1.234	1.257	1.224
Molecular Function	GO:0001102	6	RNA polymerase II activating transcription factor binding	0.160478	Q09472	1760	1.885	Up	3.5127e-06	K	Histone acetyltransferase p300 OS=Homo sapiens OX=9606 GN=EP300 PE=1 SV=2	EP300	1	2.32223e-16	145.52	NANCSLPSCQK(1)MK(1)R	2	-1.3586	5	0.642	0.648	0.679	1.223	1.266	1.222
Molecular Function	GO:0001102	6	RNA polymerase II activating transcription factor binding	0.160478	Q92793	1811	7.596	Up	0.00094031	K	CREB-binding protein OS=Homo sapiens OX=9606 GN=CREBBP PE=1 SV=3	CREBBP	1	0.00377762	83.182	K(1)TNGGCPVCK	2	0.18561	1	0.185	0.196	0.228	1.546	1.535	1.545
Molecular Function	GO:0036002	6	pre-mRNA binding	0.113171	Q09472	1769	4.035	Up	2.2499e-07	K	Histone acetyltransferase p300 OS=Homo sapiens OX=9606 GN=EP300 PE=1 SV=2	EP300	1	1.89332e-49	208.56	VVQHTK(1)GCK(1)R	2	0.47995	5	0.357	0.351	0.363	1.501	1.405	1.415
Molecular Function	GO:0036002	6	pre-mRNA binding	0.113171	Q09472	1772	11.928	Up	3.2215e-07	K	Histone acetyltransferase p300 OS=Homo sapiens OX=9606 GN=EP300 PE=1 SV=2	EP300	1	1.89332e-49	208.56	VVQHTK(1)GCK(1)R	2	0.47995	3	0.123	0.136	0.141	1.65	1.565	1.556
Molecular Function	GO:0036002	6	pre-mRNA binding	0.113171	Q09472	1762	7.585	Up	0.00119748	K	Histone acetyltransferase p300 OS=Homo sapiens OX=9606 GN=EP300 PE=1 SV=2	EP300	1	2.32223e-16	145.52	NANCSLPSCQK(1)MK(1)R	2	-1.3586	2	0.201	0.229	0.18	1.533	1.572	1.522
Molecular Function	GO:0036002	6	pre-mRNA binding	0.113171	Q09472	1774	3.958	Up	0.0092049	K	Histone acetyltransferase p300 OS=Homo sapiens OX=9606 GN=EP300 PE=1 SV=2	EP300	1	0.000167046	115.33	K(1)TNGGCPICK	3	-1.4801	4	0.287	0.344	0.456	1.437	1.433	1.432
Molecular Function	GO:0036002	6	pre-mRNA binding	0.113171	Q09472	1704	1.891	Up	5.0177e-07	K	Histone acetyltransferase p300 OS=Homo sapiens OX=9606 GN=EP300 PE=1 SV=2	EP300	1	2.47609e-10	80.688	NHDHK(1)MEK(1)LGLGLDDESNNQQAAATQSPGDSR	4	4.3749	6	0.642	0.664	0.659	1.234	1.257	1.224
Molecular Function	GO:0036002	6	pre-mRNA binding	0.113171	Q09472	1760	1.885	Up	3.5127e-06	K	Histone acetyltransferase p300 OS=Homo sapiens OX=9606 GN=EP300 PE=1 SV=2	EP300	1	2.32223e-16	145.52	NANCSLPSCQK(1)MK(1)R	2	-1.3586	5	0.642	0.648	0.679	1.223	1.266	1.222
Molecular Function	GO:0036002	6	pre-mRNA binding	0.113171	P26368	462	1.533	Up	0.00065807	K	Splicing factor U2AF 65 kDa subunit OS=Homo sapiens OX=9606 GN=U2AF2 PE=1 SV=4	U2AF2	1	0.000151529	86.944	VVVTK(1)YCDPDSYHR	3	-0.73037	2	0.702	0.77	0.809	1.15	1.143	1.203
Molecular Function	GO:0036002	6	pre-mRNA binding	0.113171	P17844	33	1.57	Up	2.1671e-06	K	Probable ATP-dependent RNA helicase DDX5 OS=Homo sapiens OX=9606 GN=DDX5 PE=1 SV=1	DDX5	1	0.0114461	85.533	K(1)FGNPGEK	2	0.64993	1	0.756	0.73	0.76	1.172	1.17	1.184
Molecular Function	GO:0036002	6	pre-mRNA binding	0.113171	P17844	45	1.709	Up	0.00047944	K	Probable ATP-dependent RNA helicase DDX5 OS=Homo sapiens OX=9606 GN=DDX5 PE=1 SV=1	DDX5	1	0.0064221	68.657	K(1)WNLDELPK	3	0.20029	1	0.715	0.73	0.671	1.179	1.31	1.127
Molecular Function	GO:0038023	4	signaling receptor activity	0.0214677	P13726	233	2.168	Up	0.00033987	K	Tissue factor OS=Homo sapiens OX=9606 GN=F3 PE=1 SV=1	F3	1	2.77667e-05	95.57	K(1)STDSPVECMGQEK	3	2.065	1	0.588	0.527	0.659	1.34	1.252	1.254
Molecular Function	GO:0038023	4	signaling receptor activity	0.0214677	O75197	526	6.771	Up	0.0093419	K	Low-density lipoprotein receptor-related protein 5 OS=Homo sapiens OX=9606 GN=LRP5 PE=1 SV=2	LRP5	1	0.0142367	76.073	TDK(1)IEVINVDGTK	2	2.3659	1	0.196	0.27	0.207	1.517	0.67	2.37
Molecular Function	GO:0038023	4	signaling receptor activity	0.0214677	P22794	170	2.522	Up	4.4941e-05	K	Protein EVI2A OS=Homo sapiens OX=9606 GN=EVI2A PE=2 SV=2	EVI2A	1	0.0125926	48.284	SK(1)QVGK(1)RQPR	3	3.0827	2	0.525	0.495	0.558	1.346	1.397	1.237
Molecular Function	GO:0038023	4	signaling receptor activity	0.0214677	P22794	174	2.522	Up	4.4941e-05	K	Protein EVI2A OS=Homo sapiens OX=9606 GN=EVI2A PE=2 SV=2	EVI2A	1	0.0125926	48.284	SK(1)QVGK(1)RQPR	3	3.0827	2	0.525	0.495	0.558	1.346	1.397	1.237
Molecular Function	GO:0038023	4	signaling receptor activity	0.0214677	O75487	44	1.652	Up	4.6607e-06	K	Glypican-4 OS=Homo sapiens OX=9606 GN=GPC4 PE=1 SV=4	GPC4	1	1.65724e-10	118.72	GFNK(1)NDAPLHEINGDHLK	4	0.22408	2	0.727	0.708	0.733	1.228	1.179	1.174
Molecular Function	GO:0038023	4	signaling receptor activity	0.0214677	Q8NGZ5	301	1.976	Up	3.3313e-06	K	Olfactory receptor 2G2 OS=Homo sapiens OX=9606 GN=OR2G2 PE=3 SV=1	OR2G2	1	0.0393046	75.738	EVK(1)GALK	2	-0.3398	1	0.658	0.629	0.616	1.28	1.24	1.24
Molecular Function	GO:0038023	4	signaling receptor activity	0.0214677	P17301	261	4.97	Up	7.7205e-05	K	Integrin alpha-2 OS=Homo sapiens OX=9606 GN=ITGA2 PE=1 SV=1	ITGA2	1	5.75495e-08	138.89	K(1)YAYSAASGGR	2	-0.52946	1	0.253	0.307	0.334	1.631	1.406	1.406
Molecular Function	GO:0035255	6	ionotropic glutamate receptor binding	0.0756357	Q9UPX8	1174	1.904	Up	0.00047943	K	SH3 and multiple ankyrin repeat domains protein 2 OS=Homo sapiens OX=9606 GN=SHANK2 PE=1 SV=3	SHANK2	1	0.0255254	57.281	MK(1)PIIHK	3	-3.76	1	0.718	0.65	0.589	1.296	1.239	1.192
Molecular Function	GO:0035255	6	ionotropic glutamate receptor binding	0.0756357	P27824	87	1.514	Up	0.00095527	K	Calnexin OS=Homo sapiens OX=9606 GN=CANX PE=1 SV=2	CANX	1	0.014782	46.88	GTLSGWILSK(1)AK	3	-0.67335	1	0.807	0.786	0.712	1.226	1.112	1.152
Molecular Function	GO:0001618	4	virus receptor activity	0.142158	P18564	548	1.991	Up	0.0032991	K	Integrin beta-6 OS=Homo sapiens OX=9606 GN=ITGB6 PE=1 SV=2	ITGB6	1	9.92231e-07	77.037	HK(1)GLLCGGNGDCDCGECVCR	3	-0.47256	1	0.5	0.688	0.699	1.2	1.299	1.258
Molecular Function	GO:0001618	4	virus receptor activity	0.142158	P08174	161	4.927	Up	1.8954e-06	K	Complement decay-accelerating factor OS=Homo sapiens OX=9606 GN=CD55 PE=1 SV=4	CD55	1	0.000511591	92.611	K(1)SCPNPGEIR	2	-0.92109	3	0.289	0.285	0.326	1.505	1.493	1.436
Molecular Function	GO:0001618	4	virus receptor activity	0.142158	P17301	261	4.97	Up	7.7205e-05	K	Integrin alpha-2 OS=Homo sapiens OX=9606 GN=ITGA2 PE=1 SV=1	ITGA2	1	5.75495e-08	138.89	K(1)YAYSAASGGR	2	-0.52946	1	0.253	0.307	0.334	1.631	1.406	1.406
Molecular Function	GO:0043236	4	laminin binding	0.116075	P23229	144	3.768	Up	1.57151e-05	K	Integrin alpha-6 OS=Homo sapiens OX=9606 GN=ITGA6 PE=1 SV=5	ITGA6	1	3.1719e-06	130.01	QHVNTK(1)QESR	2	1.0391	2	0.354	0.398	0.382	1.474	1.325	1.474
Molecular Function	GO:0043236	4	laminin binding	0.116075	P23229	594	2.852	Up	0.0097615	K	Integrin alpha-6 OS=Homo sapiens OX=9606 GN=ITGA6 PE=1 SV=5	ITGA6	1	0.0014851	102.53	YTQELTLK(1)R	2	0.55207	2	0.382	0.524	0.521	1.331	1.345	1.394
Molecular Function	GO:0043236	4	laminin binding	0.116075	P17301	261	4.97	Up	7.7205e-05	K	Integrin alpha-2 OS=Homo sapiens OX=9606 GN=ITGA2 PE=1 SV=1	ITGA2	1	5.75495e-08	138.89	K(1)YAYSAASGGR	2	-0.52946	1	0.253	0.307	0.334	1.631	1.406	1.406
Molecular Function	GO:0044325	4	ion channel binding	0.027619	P21333	994	1.525	Up	1.9772e-05	K	Filamin-A OS=Homo sapiens OX=9606 GN=FLNA PE=1 SV=4	FLNA	1	0.00346172	85.813	DQEFTVK(1)SK	3	-0.051795	2	0.786	0.743	0.763	1.155	1.183	1.157
Molecular Function	GO:0044325	4	ion channel binding	0.027619	Q12797	336	1.771	Up	0.0099388	K	Aspartyl/asparaginyl beta-hydroxylase OS=Homo sapiens OX=9606 GN=ASPH PE=1 SV=3	ASPH	1	0.0197409	87.476	LLNK(1)FDK	2	2.2137	1	0.759	0.622	0.682	1.221	1.227	1.206
Molecular Function	GO:0044325	4	ion channel binding	0.027619	P21796	61	1.877	Up	2.673e-06	K	Voltage-dependent anion-selective channel protein 1 OS=Homo sapiens OX=9606 GN=VDAC1 PE=1 SV=2	VDAC1	1	0.00011548	117.25	VTGSLETK(1)YR	3	1.0352	3	0.663	0.636	0.677	1.244	1.244	1.221
Molecular Function	GO:0044325	4	ion channel binding	0.027619	P21796	20	1.506	Up	6.0692e-05	K	Voltage-dependent anion-selective channel protein 1 OS=Homo sapiens OX=9606 GN=VDAC1 PE=1 SV=2	VDAC1	1	5.63016e-11	131.66	DVFTK(1)GYGFGLIK	2	0.76596	2	0.765	0.794	0.754	1.198	1.157	1.128
Molecular Function	GO:0044325	4	ion channel binding	0.027619	Q13557	268	2.448	Up	0.00064196	K	Calcium/calmodulin-dependent protein kinase type II subunit delta OS=Homo sapiens OX=9606 GN=CAMK2D PE=1 SV=3	CAMK2D	1	9.73432e-06	94.09	ITASEALK(1)HPWICQR	3	-2.1026	1	0.448	0.594	0.572	1.394	1.259	1.298
Molecular Function	GO:0044325	4	ion channel binding	0.027619	Q03135	57	1.523	Up	0.0012176	K	Caveolin-1 OS=Homo sapiens OX=9606 GN=CAV1 PE=1 SV=4	CAV1	1	0.00201216	67.997	DPK(1)HLNDDVVK	3	1.0261	1	0.694	0.781	0.816	1.145	1.139	1.206
Molecular Function	GO:0044325	4	ion channel binding	0.027619	O43707	779	1.506	Up	4.621e-06	K	Alpha-actinin-4 OS=Homo sapiens OX=9606 GN=ACTN4 PE=1 SV=2	ACTN4	1	2.1119e-07	92.098	ASFNHFDK(1)DHGGALGPEEFK	4	-0.48137	1	0.769	0.755	0.788	1.156	1.148	1.177
Molecular Function	GO:0008301	6	DNA binding, bending	0.0434766	P26583	3	2.956	Up	1.481e-06	K	High mobility group protein B2 OS=Homo sapiens OX=9606 GN=HMGB2 PE=1 SV=2	HMGB2	0.999989	0.00434355	72.928	GK(1)GDPNKPR	3	-2.3564	2	0.457	0.487	0.444	1.378	1.343	1.382
Molecular Function	GO:0008301	6	DNA binding, bending	0.0434766	P09429	90	1.761	Up	0.000121985	K	High mobility group protein B1 OS=Homo sapiens OX=9606 GN=HMGB1 PE=1 SV=3	HMGB1	1	0.014499	80.688	FK(1)DPNAPK	2	-0.291	2	0.677	0.691	0.704	1.289	1.223	1.136
Molecular Function	GO:0008301	6	DNA binding, bending	0.0434766	O15347	161	1.908	Up	1.7514e-05	K	High mobility group protein B3 OS=Homo sapiens OX=9606 GN=HMGB3 PE=1 SV=4	HMGB3	1	0.0120205	83.862	DVADYK(1)SK	2	-0.43322	1	0.626	0.65	0.676	1.259	1.256	1.209
Molecular Function	GO:0070403	7	NAD+ binding	0.0756357	Q16836	301	1.579	Up	0.00090275	K	Hydroxyacyl-coenzyme A dehydrogenase, mitochondrial OS=Homo sapiens OX=9606 GN=HADH PE=1 SV=3	HADH	1	0.00585392	66.27	LVAENK(1)FGK	3	0.9182	1	0.745	0.808	0.684	1.199	1.132	1.202
Molecular Function	GO:0070403	7	NAD+ binding	0.0756357	P47895	423	1.504	Up	1.81114e-05	K	Aldehyde dehydrogenase family 1 member A3 OS=Homo sapiens OX=9606 GN=ALDH1A3 PE=1 SV=2	ALDH1A3	1	3.01099e-05	135.99	FK(1)SIEEVIK	2	-0.13248	1	0.763	0.772	0.78	1.196	1.14	1.145
Molecular Function	GO:0015297	6	antiporter activity	0.116075	P08195	266	1.608	Up	0.00037925	K	4F2 cell-surface antigen heavy chain OS=Homo sapiens OX=9606 GN=SLC3A2 PE=1 SV=3	SLC3A2	1	3.45387e-05	99.788	GLVLGPIHK(1)NQK	3	-0.25361	1	0.772	0.719	0.718	1.155	1.268	1.129
Molecular Function	GO:0015297	6	antiporter activity	0.116075	P04920	893	4.44	Up	4.2628e-05	K	Anion exchange protein 2 OS=Homo sapiens OX=9606 GN=SLC4A2 PE=1 SV=4	SLC4A2	1	2.23352e-06	112.42	SLAGQSGQGK(1)PR	2	-2.3535	1	0.287	0.375	0.323	1.476	1.415	1.482
Molecular Function	GO:0016830	4	carbon-carbon lyase activity	0.121779	P34897	200	1.553	Up	0.0024569	K	Serine hydroxymethyltransferase, mitochondrial OS=Homo sapiens OX=9606 GN=SHMT2 PE=1 SV=3	SHMT2	1	1.11032e-09	113.54	LNPK(1)TGLIDYNQLALTAR	3	-0.53359	1	0.671	0.753	0.836	1.158	1.146	1.206
Molecular Function	GO:0016830	4	carbon-carbon lyase activity	0.121779	P04075	200	1.909	Up	0.00039957	K	Fructose-bisphosphate aldolase A OS=Homo sapiens OX=9606 GN=ALDOA PE=1 SV=2	ALDOA	1	1.06057e-28	125	YASICQQNGIVPIVEPEILPDGDHDLK(1)R	3	-1.6772	8	0.693	0.577	0.681	1.214	1.249	1.262
Molecular Function	GO:0016830	4	carbon-carbon lyase activity	0.121779	P04075	108	1.531	Up	0.00098334	K	Fructose-bisphosphate aldolase A OS=Homo sapiens OX=9606 GN=ALDOA PE=1 SV=2	ALDOA	1	0.000445929	92.866	GGVVGIK(1)VDK	2	0.15856	1	0.727	0.722	0.837	1.193	1.157	1.149
Molecular Function	GO:0016830	4	carbon-carbon lyase activity	0.121779	P17174	97	1.571	Up	0.0062823	K	Aspartate aminotransferase, cytoplasmic OS=Homo sapiens OX=9606 GN=GOT1 PE=1 SV=3	GOT1	1	0.000526115	69.03	LALGDDSPALK(1)EK	3	4.0464	1	0.768	0.717	0.76	1.092	1.374	1.06
Molecular Function	GO:0016830	4	carbon-carbon lyase activity	0.121779	P11172	314	3.176	Up	6.5206e-07	K	Uridine 5'-monophosphate synthase OS=Homo sapiens OX=9606 GN=UMPS PE=1 SV=1	UMPS	1	0.000819799	82.489	K(1)FADIGNTVK	3	1.6372	2	0.43	0.446	0.433	1.439	1.332	1.387
Molecular Function	GO:0005089	5	Rho guanyl-nucleotide exchange factor activity	0.0434766	Q13009	564	2.554	Up	2.264e-05	K	T-lymphoma invasion and metastasis-inducing protein 1 OS=Homo sapiens OX=9606 GN=TIAM1 PE=1 SV=2	TIAM1	1	0.00536023	86.794	LLK(1)SEIK	3	-0.69534	1	0.501	0.52	0.54	1.387	1.234	1.366
Molecular Function	GO:0005089	5	Rho guanyl-nucleotide exchange factor activity	0.0434766	Q14185	641	2.953	Up	0.001995	K	Dedicator of cytokinesis protein 1 OS=Homo sapiens OX=9606 GN=DOCK1 PE=1 SV=2	DOCK1	1	0.0385614	45.28	QLMK(1)VDGGEVVK	2	-2.6314	1	0.509	0.442	0.439	1.378	1.372	1.355
Molecular Function	GO:0005089	5	Rho guanyl-nucleotide exchange factor activity	0.0434766	Q8N1W1	979	2.153	Up	2.4419e-05	K	Rho guanine nucleotide exchange factor 28 OS=Homo sapiens OX=9606 GN=ARHGEF28 PE=1 SV=3	ARHGEF28	1	0.026785	64.265	FQNFIK(1)LR	2	-0.53398	1	0.591	0.56	0.631	1.263	1.306	1.268
Molecular Function	GO:0047485	4	protein N-terminus binding	0.249946	O75531	6	1.971	Up	0.00055745	K	Barrier-to-autointegration factor OS=Homo sapiens OX=9606 GN=BANF1 PE=1 SV=1	BANF1	1	0.0231461	58.119	TTSQK(1)HR	2	-0.95945	1	0.693	0.598	0.613	1.202	1.173	1.377
Molecular Function	GO:0047485	4	protein N-terminus binding	0.249946	Q99623	296	2.159	Up	1.93966e-05	K	Prohibitin-2 OS=Homo sapiens OX=9606 GN=PHB2 PE=1 SV=2	PHB2	1	0.0114077	74.841	GSDSLIK(1)GK	2	0.45945	1	0.558	0.601	0.619	1.273	1.305	1.261
Molecular Function	GO:0047485	4	protein N-terminus binding	0.249946	Q99623	216	1.59	Up	0.000140435	K	Prohibitin-2 OS=Homo sapiens OX=9606 GN=PHB2 PE=1 SV=2	PHB2	1	0.000626104	118.28	AQFLVEK(1)AK	3	0.30393	2	0.778	0.746	0.704	1.199	1.198	1.146
Molecular Function	GO:0047485	4	protein N-terminus binding	0.249946	O43707	779	1.506	Up	4.621e-06	K	Alpha-actinin-4 OS=Homo sapiens OX=9606 GN=ACTN4 PE=1 SV=2	ACTN4	1	2.1119e-07	92.098	ASFNHFDK(1)DHGGALGPEEFK	4	-0.48137	1	0.769	0.755	0.788	1.156	1.148	1.177
Molecular Function	GO:0047485	4	protein N-terminus binding	0.249946	Q9UQ35	2602	2.195	Up	9.6664e-05	K	Serine/arginine repetitive matrix protein 2 OS=Homo sapiens OX=9606 GN=SRRM2 PE=1 SV=2	SRRM2	1	0.00254731	63.181	EGRPPEPTPAK(1)R	3	-0.1196	1	0.56	0.596	0.6	1.258	1.396	1.201
Molecular Function	GO:0003697	6	single-stranded DNA binding	0.000158069	P36776	367	1.766	Up	1.2118e-06	K	Lon protease homolog, mitochondrial OS=Homo sapiens OX=9606 GN=LONP1 PE=1 SV=2	LONP1	1	0.0134532	94.114	ALSLLK(1)K	2	0.1015	1	0.679	0.702	0.684	1.21	1.197	1.239
Molecular Function	GO:0003697	6	single-stranded DNA binding	0.000158069	P09651	105	1.515	Up	0.0038216	K	Heterogeneous nuclear ribonucleoprotein A1 OS=Homo sapiens OX=9606 GN=HNRNPA1 PE=1 SV=5	HNRNPA1	1	0.000353752	77.776	EDSQRPGAHLTVK(1)K	3	-0.32852	2	0.768	0.733	0.803	1.186	1.276	1.029
Molecular Function	GO:0003697	6	single-stranded DNA binding	0.000158069	Q15365	31	1.653	Up	0.0098571	K	Poly(rC)-binding protein 1 OS=Homo sapiens OX=9606 GN=PCBP1 PE=1 SV=2	PCBP1	1	0.00209659	91.658	EVGSIIGK(1)K	2	0.74548	2	0.745	0.741	0.679	1.055	1.447	1.076
Molecular Function	GO:0003697	6	single-stranded DNA binding	0.000158069	Q15631	56	1.728	Up	0.00117994	K	Translin OS=Homo sapiens OX=9606 GN=TSN PE=1 SV=1	TSN	1	2.53093e-08	93.804	EILTLLQGVHQGAGFQDIPK(1)R	3	-0.52906	1	0.696	0.66	0.746	1.349	1.135	1.148
Molecular Function	GO:0003697	6	single-stranded DNA binding	0.000158069	Q14566	407	1.656	Up	0.00065503	K	DNA replication licensing factor MCM6 OS=Homo sapiens OX=9606 GN=MCM6 PE=1 SV=1	MCM6	1	0.0114761	46.318	SQFLK(1)HVEEFSPR	3	-1.3201	1	0.727	0.75	0.689	1.303	1.168	1.116
Molecular Function	GO:0003697	6	single-stranded DNA binding	0.000158069	P26583	3	2.956	Up	1.481e-06	K	High mobility group protein B2 OS=Homo sapiens OX=9606 GN=HMGB2 PE=1 SV=2	HMGB2	0.999989	0.00434355	72.928	GK(1)GDPNKPR	3	-2.3564	2	0.457	0.487	0.444	1.378	1.343	1.382
Molecular Function	GO:0003697	6	single-stranded DNA binding	0.000158069	P09429	90	1.761	Up	0.000121985	K	High mobility group protein B1 OS=Homo sapiens OX=9606 GN=HMGB1 PE=1 SV=3	HMGB1	1	0.014499	80.688	FK(1)DPNAPK	2	-0.291	2	0.677	0.691	0.704	1.289	1.223	1.136
Molecular Function	GO:0003697	6	single-stranded DNA binding	0.000158069	P27694	163	2.076	Up	1.81648e-05	K	Replication protein A 70 kDa DNA-binding subunit OS=Homo sapiens OX=9606 GN=RPA1 PE=1 SV=2	RPA1	1	9.99335e-08	143.97	AYGASK(1)TFGK	3	1.1683	2	0.616	0.618	0.6	1.341	1.243	1.224
Molecular Function	GO:0003697	6	single-stranded DNA binding	0.000158069	Q9Y2W2	13	1.624	Up	2.2721e-05	K	WW domain-binding protein 11 OS=Homo sapiens OX=9606 GN=WBP11 PE=1 SV=1	WBP11	1	0.000655499	89.992	SGK(1)FMNPTDQAR	2	-1.3379	1	0.727	0.724	0.744	1.237	1.168	1.16
Molecular Function	GO:0003697	6	single-stranded DNA binding	0.000158069	P53999	41	1.918	Up	2.1404e-06	K	Activated RNA polymerase II transcriptional coactivator p15 OS=Homo sapiens OX=9606 GN=SUB1 PE=1 SV=3	SUB1	1	0.0111062	85.355	QK(1)TGETSR	2	-0.16956	1	0.637	0.648	0.66	1.283	1.23	1.218
Molecular Function	GO:0003697	6	single-stranded DNA binding	0.000158069	P42704	1357	1.508	Up	0.00045917	K	Leucine-rich PPR motif-containing protein, mitochondrial OS=Homo sapiens OX=9606 GN=LRPPRC PE=1 SV=3	LRPPRC	1	0.0295481	72.23	LDDLFLK(1)R	2	0.38254	1	0.752	0.803	0.752	1.115	1.129	1.235
Molecular Function	GO:0051427	5	hormone receptor binding	0.098819	Q09472	1769	4.035	Up	2.2499e-07	K	Histone acetyltransferase p300 OS=Homo sapiens OX=9606 GN=EP300 PE=1 SV=2	EP300	1	1.89332e-49	208.56	VVQHTK(1)GCK(1)R	2	0.47995	5	0.357	0.351	0.363	1.501	1.405	1.415
Molecular Function	GO:0051427	5	hormone receptor binding	0.098819	Q09472	1772	11.928	Up	3.2215e-07	K	Histone acetyltransferase p300 OS=Homo sapiens OX=9606 GN=EP300 PE=1 SV=2	EP300	1	1.89332e-49	208.56	VVQHTK(1)GCK(1)R	2	0.47995	3	0.123	0.136	0.141	1.65	1.565	1.556
Molecular Function	GO:0051427	5	hormone receptor binding	0.098819	Q09472	1762	7.585	Up	0.00119748	K	Histone acetyltransferase p300 OS=Homo sapiens OX=9606 GN=EP300 PE=1 SV=2	EP300	1	2.32223e-16	145.52	NANCSLPSCQK(1)MK(1)R	2	-1.3586	2	0.201	0.229	0.18	1.533	1.572	1.522
Molecular Function	GO:0051427	5	hormone receptor binding	0.098819	Q09472	1774	3.958	Up	0.0092049	K	Histone acetyltransferase p300 OS=Homo sapiens OX=9606 GN=EP300 PE=1 SV=2	EP300	1	0.000167046	115.33	K(1)TNGGCPICK	3	-1.4801	4	0.287	0.344	0.456	1.437	1.433	1.432
Molecular Function	GO:0051427	5	hormone receptor binding	0.098819	Q09472	1704	1.891	Up	5.0177e-07	K	Histone acetyltransferase p300 OS=Homo sapiens OX=9606 GN=EP300 PE=1 SV=2	EP300	1	2.47609e-10	80.688	NHDHK(1)MEK(1)LGLGLDDESNNQQAAATQSPGDSR	4	4.3749	6	0.642	0.664	0.659	1.234	1.257	1.224
Molecular Function	GO:0051427	5	hormone receptor binding	0.098819	Q09472	1760	1.885	Up	3.5127e-06	K	Histone acetyltransferase p300 OS=Homo sapiens OX=9606 GN=EP300 PE=1 SV=2	EP300	1	2.32223e-16	145.52	NANCSLPSCQK(1)MK(1)R	2	-1.3586	5	0.642	0.648	0.679	1.223	1.266	1.222
Molecular Function	GO:0051427	5	hormone receptor binding	0.098819	P62195	330	2.306	Up	0.0105445	K	26S proteasome regulatory subunit 8 OS=Homo sapiens OX=9606 GN=PSMC5 PE=1 SV=1	PSMC5	1	0.006593	64.82	LDILK(1)IHSR	3	-0.7783	1	0.602	0.591	0.492	0.932	1.66	1.293
Molecular Function	GO:0051427	5	hormone receptor binding	0.098819	Q92841	132	1.541	Up	0.0052759	K	Probable ATP-dependent RNA helicase DDX17 OS=Homo sapiens OX=9606 GN=DDX17 PE=1 SV=2	DDX17	1	0.00344767	52.862	FEK(1)NFYVEHPEVAR	3	-1.4923	1	0.673	0.875	0.724	1.134	1.184	1.184
Molecular Function	GO:0051427	5	hormone receptor binding	0.098819	Q92841	121	1.577	Up	0.033361	K	Probable ATP-dependent RNA helicase DDX17 OS=Homo sapiens OX=9606 GN=DDX17 PE=1 SV=2	DDX17	1	0.0114423	75.229	K(1)WDLSELPK	3	0.073207	2	0.69	0.668	0.879	1.18	1.164	1.183
Molecular Function	GO:0051427	5	hormone receptor binding	0.098819	Q8TDD1	667	1.501	Up	0.0015366	K	ATP-dependent RNA helicase DDX54 OS=Homo sapiens OX=9606 GN=DDX54 PE=1 SV=2	DDX54	1	0.0262812	46.643	RQRSGPNRGAK(1)R	2	3.8716	1	0.722	0.767	0.829	1.238	1.103	1.138
Molecular Function	GO:0051427	5	hormone receptor binding	0.098819	Q99623	296	2.159	Up	1.93966e-05	K	Prohibitin-2 OS=Homo sapiens OX=9606 GN=PHB2 PE=1 SV=2	PHB2	1	0.0114077	74.841	GSDSLIK(1)GK	2	0.45945	1	0.558	0.601	0.619	1.273	1.305	1.261
Molecular Function	GO:0051427	5	hormone receptor binding	0.098819	Q99623	216	1.59	Up	0.000140435	K	Prohibitin-2 OS=Homo sapiens OX=9606 GN=PHB2 PE=1 SV=2	PHB2	1	0.000626104	118.28	AQFLVEK(1)AK	3	0.30393	2	0.778	0.746	0.704	1.199	1.198	1.146
Molecular Function	GO:0051427	5	hormone receptor binding	0.098819	P17844	33	1.57	Up	2.1671e-06	K	Probable ATP-dependent RNA helicase DDX5 OS=Homo sapiens OX=9606 GN=DDX5 PE=1 SV=1	DDX5	1	0.0114461	85.533	K(1)FGNPGEK	2	0.64993	1	0.756	0.73	0.76	1.172	1.17	1.184
Molecular Function	GO:0051427	5	hormone receptor binding	0.098819	P17844	45	1.709	Up	0.00047944	K	Probable ATP-dependent RNA helicase DDX5 OS=Homo sapiens OX=9606 GN=DDX5 PE=1 SV=1	DDX5	1	0.0064221	68.657	K(1)WNLDELPK	3	0.20029	1	0.715	0.73	0.671	1.179	1.31	1.127
Molecular Function	GO:0051427	5	hormone receptor binding	0.098819	O43707	779	1.506	Up	4.621e-06	K	Alpha-actinin-4 OS=Homo sapiens OX=9606 GN=ACTN4 PE=1 SV=2	ACTN4	1	2.1119e-07	92.098	ASFNHFDK(1)DHGGALGPEEFK	4	-0.48137	1	0.769	0.755	0.788	1.156	1.148	1.177
Molecular Function	GO:0099516	7	ion antiporter activity	0.116075	P08195	266	1.608	Up	0.00037925	K	4F2 cell-surface antigen heavy chain OS=Homo sapiens OX=9606 GN=SLC3A2 PE=1 SV=3	SLC3A2	1	3.45387e-05	99.788	GLVLGPIHK(1)NQK	3	-0.25361	1	0.772	0.719	0.718	1.155	1.268	1.129
Molecular Function	GO:0099516	7	ion antiporter activity	0.116075	P04920	893	4.44	Up	4.2628e-05	K	Anion exchange protein 2 OS=Homo sapiens OX=9606 GN=SLC4A2 PE=1 SV=4	SLC4A2	1	2.23352e-06	112.42	SLAGQSGQGK(1)PR	2	-2.3535	1	0.287	0.375	0.323	1.476	1.415	1.482
Molecular Function	GO:0005125	5	cytokine activity	0.303363	P15692	149	1.52	Up	0.0183197	K	Vascular endothelial growth factor A OS=Homo sapiens OX=9606 GN=VEGFA PE=1 SV=2	VEGFA	1	0.0158118	68.016	GK(1)GK(1)GQK(1)R	3	0.20842	1	0.619	0.836	0.835	1.054	1.197	1.23
Molecular Function	GO:0005125	5	cytokine activity	0.303363	P15692	147	1.52	Up	0.0183197	K	Vascular endothelial growth factor A OS=Homo sapiens OX=9606 GN=VEGFA PE=1 SV=2	VEGFA	1	0.0158118	68.016	GK(1)GK(1)GQK(1)R	3	0.20842	1	0.619	0.836	0.835	1.054	1.197	1.23
Molecular Function	GO:0005125	5	cytokine activity	0.303363	P15692	152	1.52	Up	0.0183197	K	Vascular endothelial growth factor A OS=Homo sapiens OX=9606 GN=VEGFA PE=1 SV=2	VEGFA	1	0.0158118	68.016	GK(1)GK(1)GQK(1)R	3	0.20842	1	0.619	0.836	0.835	1.054	1.197	1.23
Molecular Function	GO:0005125	5	cytokine activity	0.303363	P09429	90	1.761	Up	0.000121985	K	High mobility group protein B1 OS=Homo sapiens OX=9606 GN=HMGB1 PE=1 SV=3	HMGB1	1	0.014499	80.688	FK(1)DPNAPK	2	-0.291	2	0.677	0.691	0.704	1.289	1.223	1.136
Molecular Function	GO:0008022	4	protein C-terminus binding	0.0797269	O75531	6	1.971	Up	0.00055745	K	Barrier-to-autointegration factor OS=Homo sapiens OX=9606 GN=BANF1 PE=1 SV=1	BANF1	1	0.0231461	58.119	TTSQK(1)HR	2	-0.95945	1	0.693	0.598	0.613	1.202	1.173	1.377
Molecular Function	GO:0008022	4	protein C-terminus binding	0.0797269	Q9NRD5	88	2.812	Up	3.5799e-06	K	PRKCA-binding protein OS=Homo sapiens OX=9606 GN=PICK1 PE=1 SV=2	PICK1	1	0.0229749	55.261	VEVAK(1)MIQEVK	2	0.85616	1	0.484	0.504	0.458	1.401	1.307	1.358
Molecular Function	GO:0008022	4	protein C-terminus binding	0.0797269	Q9UBE0	32	1.782	Up	0.00021626	K	SUMO-activating enzyme subunit 1 OS=Homo sapiens OX=9606 GN=SAE1 PE=1 SV=1	SAE1	1	0.0171974	70.056	LWGLEAQK(1)R	2	1.3447	1	0.634	0.717	0.701	1.245	1.252	1.16
Molecular Function	GO:0008022	4	protein C-terminus binding	0.0797269	P31948	169	1.725	Up	0.00034403	K	Stress-induced-phosphoprotein 1 OS=Homo sapiens OX=9606 GN=STIP1 PE=1 SV=1	STIP1	0.99982	0.000892419	63.185	NKPSDLGTK(1)LQDPR	3	-3.3261	1	0.667	0.685	0.75	1.286	1.154	1.185
Molecular Function	GO:0008022	4	protein C-terminus binding	0.0797269	P31948	325	1.713	Up	3.6441e-05	K	Stress-induced-phosphoprotein 1 OS=Homo sapiens OX=9606 GN=STIP1 PE=1 SV=1	STIP1	1	0.0105559	44.807	DAIHFYNK(1)SLAEHR	3	0.066022	1	0.731	0.681	0.7	1.215	1.169	1.234
Molecular Function	GO:0008022	4	protein C-terminus binding	0.0797269	P35232	202	1.61	Up	6.4106e-05	K	Prohibitin OS=Homo sapiens OX=9606 GN=PHB PE=1 SV=1	PHB	1	8.49153e-05	104.22	FVVEK(1)AEQQK	3	1.0761	1	0.727	0.772	0.707	1.186	1.162	1.203
Molecular Function	GO:0008022	4	protein C-terminus binding	0.0797269	Q09472	1769	4.035	Up	2.2499e-07	K	Histone acetyltransferase p300 OS=Homo sapiens OX=9606 GN=EP300 PE=1 SV=2	EP300	1	1.89332e-49	208.56	VVQHTK(1)GCK(1)R	2	0.47995	5	0.357	0.351	0.363	1.501	1.405	1.415
Molecular Function	GO:0008022	4	protein C-terminus binding	0.0797269	Q09472	1772	11.928	Up	3.2215e-07	K	Histone acetyltransferase p300 OS=Homo sapiens OX=9606 GN=EP300 PE=1 SV=2	EP300	1	1.89332e-49	208.56	VVQHTK(1)GCK(1)R	2	0.47995	3	0.123	0.136	0.141	1.65	1.565	1.556
Molecular Function	GO:0008022	4	protein C-terminus binding	0.0797269	Q09472	1762	7.585	Up	0.00119748	K	Histone acetyltransferase p300 OS=Homo sapiens OX=9606 GN=EP300 PE=1 SV=2	EP300	1	2.32223e-16	145.52	NANCSLPSCQK(1)MK(1)R	2	-1.3586	2	0.201	0.229	0.18	1.533	1.572	1.522
Molecular Function	GO:0008022	4	protein C-terminus binding	0.0797269	Q09472	1774	3.958	Up	0.0092049	K	Histone acetyltransferase p300 OS=Homo sapiens OX=9606 GN=EP300 PE=1 SV=2	EP300	1	0.000167046	115.33	K(1)TNGGCPICK	3	-1.4801	4	0.287	0.344	0.456	1.437	1.433	1.432
Molecular Function	GO:0008022	4	protein C-terminus binding	0.0797269	Q09472	1704	1.891	Up	5.0177e-07	K	Histone acetyltransferase p300 OS=Homo sapiens OX=9606 GN=EP300 PE=1 SV=2	EP300	1	2.47609e-10	80.688	NHDHK(1)MEK(1)LGLGLDDESNNQQAAATQSPGDSR	4	4.3749	6	0.642	0.664	0.659	1.234	1.257	1.224
Molecular Function	GO:0008022	4	protein C-terminus binding	0.0797269	Q09472	1760	1.885	Up	3.5127e-06	K	Histone acetyltransferase p300 OS=Homo sapiens OX=9606 GN=EP300 PE=1 SV=2	EP300	1	2.32223e-16	145.52	NANCSLPSCQK(1)MK(1)R	2	-1.3586	5	0.642	0.648	0.679	1.223	1.266	1.222
Molecular Function	GO:0008022	4	protein C-terminus binding	0.0797269	P07196	128	1.516	Up	0.0130616	K	Neurofilament light polypeptide OS=Homo sapiens OX=9606 GN=NEFL PE=1 SV=3	NEFL	1	0.0426312	41.448	QK(1)HSEPSR	3	0.068112	1	0.63	0.85	0.819	1.199	1.198	1.089
Molecular Function	GO:0008022	4	protein C-terminus binding	0.0797269	Q99623	296	2.159	Up	1.93966e-05	K	Prohibitin-2 OS=Homo sapiens OX=9606 GN=PHB2 PE=1 SV=2	PHB2	1	0.0114077	74.841	GSDSLIK(1)GK	2	0.45945	1	0.558	0.601	0.619	1.273	1.305	1.261
Molecular Function	GO:0008022	4	protein C-terminus binding	0.0797269	Q99623	216	1.59	Up	0.000140435	K	Prohibitin-2 OS=Homo sapiens OX=9606 GN=PHB2 PE=1 SV=2	PHB2	1	0.000626104	118.28	AQFLVEK(1)AK	3	0.30393	2	0.778	0.746	0.704	1.199	1.198	1.146
Molecular Function	GO:0008022	4	protein C-terminus binding	0.0797269	P31946	70	1.526	Up	0.0008628	K	14-3-3 protein beta/alpha OS=Homo sapiens OX=9606 GN=YWHAB PE=1 SV=3	YWHAB	1	1.60397e-05	106.67	VISSIEQK(1)TER	3	-0.051644	2	0.777	0.814	0.701	1.201	1.131	1.165
Molecular Function	GO:0005539	4	glycosaminoglycan binding	0.0811995	P15692	149	1.52	Up	0.0183197	K	Vascular endothelial growth factor A OS=Homo sapiens OX=9606 GN=VEGFA PE=1 SV=2	VEGFA	1	0.0158118	68.016	GK(1)GK(1)GQK(1)R	3	0.20842	1	0.619	0.836	0.835	1.054	1.197	1.23
Molecular Function	GO:0005539	4	glycosaminoglycan binding	0.0811995	P15692	147	1.52	Up	0.0183197	K	Vascular endothelial growth factor A OS=Homo sapiens OX=9606 GN=VEGFA PE=1 SV=2	VEGFA	1	0.0158118	68.016	GK(1)GK(1)GQK(1)R	3	0.20842	1	0.619	0.836	0.835	1.054	1.197	1.23
Molecular Function	GO:0005539	4	glycosaminoglycan binding	0.0811995	P15692	152	1.52	Up	0.0183197	K	Vascular endothelial growth factor A OS=Homo sapiens OX=9606 GN=VEGFA PE=1 SV=2	VEGFA	1	0.0158118	68.016	GK(1)GK(1)GQK(1)R	3	0.20842	1	0.619	0.836	0.835	1.054	1.197	1.23
Molecular Function	GO:0005539	4	glycosaminoglycan binding	0.0811995	Q15063	676	1.528	Up	0.00066247	K	Periostin OS=Homo sapiens OX=9606 GN=POSTN PE=1 SV=2	POSTN	1	0.00277252	88.596	IITK(1)VVEPK	2	-0.2033	1	0.802	0.784	0.702	1.127	1.19	1.178
Molecular Function	GO:0005539	4	glycosaminoglycan binding	0.0811995	P02749	303	21.341	Up	4.0011e-06	K	Beta-2-glycoprotein 1 OS=Homo sapiens OX=9606 GN=APOH PE=1 SV=3	APOH	1	7.12912e-09	145.31	VSFFCK(1)NK(1)EK	2	-0.45882	1	0.064	0.074	0.091	1.696	1.57	1.621
Molecular Function	GO:0005539	4	glycosaminoglycan binding	0.0811995	P02749	301	6.988	Up	4.3035e-08	K	Beta-2-glycoprotein 1 OS=Homo sapiens OX=9606 GN=APOH PE=1 SV=3	APOH	1	7.12912e-09	145.31	VSFFCK(1)NK(1)EK	2	-0.45882	7	0.214	0.222	0.222	1.585	1.496	1.517
Molecular Function	GO:0005539	4	glycosaminoglycan binding	0.0811995	Q14520	173	6.547	Up	3.9393e-06	K	Hyaluronan-binding protein 2 OS=Homo sapiens OX=9606 GN=HABP2 PE=1 SV=1	HABP2	1	4.04891e-11	145.43	SK(1)FTCACPDQFK	3	0.39348	2	0.211	0.229	0.258	1.592	1.456	1.522
Molecular Function	GO:0001228	5	transcriptional activator activity, RNA polymerase II transcription regulatory region sequence-specific binding	0.0723455	Q09472	1769	4.035	Up	2.2499e-07	K	Histone acetyltransferase p300 OS=Homo sapiens OX=9606 GN=EP300 PE=1 SV=2	EP300	1	1.89332e-49	208.56	VVQHTK(1)GCK(1)R	2	0.47995	5	0.357	0.351	0.363	1.501	1.405	1.415
Molecular Function	GO:0001228	5	transcriptional activator activity, RNA polymerase II transcription regulatory region sequence-specific binding	0.0723455	Q09472	1772	11.928	Up	3.2215e-07	K	Histone acetyltransferase p300 OS=Homo sapiens OX=9606 GN=EP300 PE=1 SV=2	EP300	1	1.89332e-49	208.56	VVQHTK(1)GCK(1)R	2	0.47995	3	0.123	0.136	0.141	1.65	1.565	1.556
Molecular Function	GO:0001228	5	transcriptional activator activity, RNA polymerase II transcription regulatory region sequence-specific binding	0.0723455	Q09472	1762	7.585	Up	0.00119748	K	Histone acetyltransferase p300 OS=Homo sapiens OX=9606 GN=EP300 PE=1 SV=2	EP300	1	2.32223e-16	145.52	NANCSLPSCQK(1)MK(1)R	2	-1.3586	2	0.201	0.229	0.18	1.533	1.572	1.522
Molecular Function	GO:0001228	5	transcriptional activator activity, RNA polymerase II transcription regulatory region sequence-specific binding	0.0723455	Q09472	1774	3.958	Up	0.0092049	K	Histone acetyltransferase p300 OS=Homo sapiens OX=9606 GN=EP300 PE=1 SV=2	EP300	1	0.000167046	115.33	K(1)TNGGCPICK	3	-1.4801	4	0.287	0.344	0.456	1.437	1.433	1.432
Molecular Function	GO:0001228	5	transcriptional activator activity, RNA polymerase II transcription regulatory region sequence-specific binding	0.0723455	Q09472	1704	1.891	Up	5.0177e-07	K	Histone acetyltransferase p300 OS=Homo sapiens OX=9606 GN=EP300 PE=1 SV=2	EP300	1	2.47609e-10	80.688	NHDHK(1)MEK(1)LGLGLDDESNNQQAAATQSPGDSR	4	4.3749	6	0.642	0.664	0.659	1.234	1.257	1.224
Molecular Function	GO:0001228	5	transcriptional activator activity, RNA polymerase II transcription regulatory region sequence-specific binding	0.0723455	Q09472	1760	1.885	Up	3.5127e-06	K	Histone acetyltransferase p300 OS=Homo sapiens OX=9606 GN=EP300 PE=1 SV=2	EP300	1	2.32223e-16	145.52	NANCSLPSCQK(1)MK(1)R	2	-1.3586	5	0.642	0.648	0.679	1.223	1.266	1.222
Molecular Function	GO:0001228	5	transcriptional activator activity, RNA polymerase II transcription regulatory region sequence-specific binding	0.0723455	O60281	2672	2.381	Up	2.3313e-05	K	Zinc finger protein 292 OS=Homo sapiens OX=9606 GN=ZNF292 PE=1 SV=3	ZNF292	1	0.0187283	78.113	IVLDK(1)NLK	2	-0.44974	1	0.577	0.521	0.552	1.371	1.249	1.309
Molecular Function	GO:0001228	5	transcriptional activator activity, RNA polymerase II transcription regulatory region sequence-specific binding	0.0723455	Q8NI51	335	1.578	Up	0.00022197	K	Transcriptional repressor CTCFL OS=Homo sapiens OX=9606 GN=CTCFL PE=1 SV=2	CTCFL	0.999974	0.0106656	55.314	YK(1)HTHEKPFK	4	1.7238	1	0.752	0.764	0.724	1.237	1.189	1.108
Molecular Function	GO:0001228	5	transcriptional activator activity, RNA polymerase II transcription regulatory region sequence-specific binding	0.0723455	P53999	41	1.918	Up	2.1404e-06	K	Activated RNA polymerase II transcriptional coactivator p15 OS=Homo sapiens OX=9606 GN=SUB1 PE=1 SV=3	SUB1	1	0.0111062	85.355	QK(1)TGETSR	2	-0.16956	1	0.637	0.648	0.66	1.283	1.23	1.218
Molecular Function	GO:0001228	5	transcriptional activator activity, RNA polymerase II transcription regulatory region sequence-specific binding	0.0723455	O94916	259	7.661	Up	1.5626e-06	K	Nuclear factor of activated T-cells 5 OS=Homo sapiens OX=9606 GN=NFAT5 PE=1 SV=1	NFAT5	1	0.038802	41.695	AGNGTLENQK(1)GTGVK(1)K	3	2.9694	1	0.192	0.214	0.198	1.463	1.681	1.483
Molecular Function	GO:0001228	5	transcriptional activator activity, RNA polymerase II transcription regulatory region sequence-specific binding	0.0723455	O94916	264	7.661	Up	1.5626e-06	K	Nuclear factor of activated T-cells 5 OS=Homo sapiens OX=9606 GN=NFAT5 PE=1 SV=1	NFAT5	1	0.038802	41.695	AGNGTLENQK(1)GTGVK(1)K	3	2.9694	1	0.192	0.214	0.198	1.463	1.681	1.483
Molecular Function	GO:0000976	8	transcription regulatory region sequence-specific DNA binding	0.00864816	P07910	176	1.934	Up	2.1133e-05	K	Heterogeneous nuclear ribonucleoproteins C1/C2 OS=Homo sapiens OX=9606 GN=HNRNPC PE=1 SV=4	HNRNPC	1	4.37087e-06	137.4	SGFNSK(1)SGQR	2	0.17987	2	0.61	0.654	0.667	1.26	1.219	1.256
Molecular Function	GO:0000976	8	transcription regulatory region sequence-specific DNA binding	0.00864816	Q09472	1769	4.035	Up	2.2499e-07	K	Histone acetyltransferase p300 OS=Homo sapiens OX=9606 GN=EP300 PE=1 SV=2	EP300	1	1.89332e-49	208.56	VVQHTK(1)GCK(1)R	2	0.47995	5	0.357	0.351	0.363	1.501	1.405	1.415
Molecular Function	GO:0000976	8	transcription regulatory region sequence-specific DNA binding	0.00864816	Q09472	1772	11.928	Up	3.2215e-07	K	Histone acetyltransferase p300 OS=Homo sapiens OX=9606 GN=EP300 PE=1 SV=2	EP300	1	1.89332e-49	208.56	VVQHTK(1)GCK(1)R	2	0.47995	3	0.123	0.136	0.141	1.65	1.565	1.556
Molecular Function	GO:0000976	8	transcription regulatory region sequence-specific DNA binding	0.00864816	Q09472	1762	7.585	Up	0.00119748	K	Histone acetyltransferase p300 OS=Homo sapiens OX=9606 GN=EP300 PE=1 SV=2	EP300	1	2.32223e-16	145.52	NANCSLPSCQK(1)MK(1)R	2	-1.3586	2	0.201	0.229	0.18	1.533	1.572	1.522
Molecular Function	GO:0000976	8	transcription regulatory region sequence-specific DNA binding	0.00864816	Q09472	1774	3.958	Up	0.0092049	K	Histone acetyltransferase p300 OS=Homo sapiens OX=9606 GN=EP300 PE=1 SV=2	EP300	1	0.000167046	115.33	K(1)TNGGCPICK	3	-1.4801	4	0.287	0.344	0.456	1.437	1.433	1.432
Molecular Function	GO:0000976	8	transcription regulatory region sequence-specific DNA binding	0.00864816	Q09472	1704	1.891	Up	5.0177e-07	K	Histone acetyltransferase p300 OS=Homo sapiens OX=9606 GN=EP300 PE=1 SV=2	EP300	1	2.47609e-10	80.688	NHDHK(1)MEK(1)LGLGLDDESNNQQAAATQSPGDSR	4	4.3749	6	0.642	0.664	0.659	1.234	1.257	1.224
Molecular Function	GO:0000976	8	transcription regulatory region sequence-specific DNA binding	0.00864816	Q09472	1760	1.885	Up	3.5127e-06	K	Histone acetyltransferase p300 OS=Homo sapiens OX=9606 GN=EP300 PE=1 SV=2	EP300	1	2.32223e-16	145.52	NANCSLPSCQK(1)MK(1)R	2	-1.3586	5	0.642	0.648	0.679	1.223	1.266	1.222
Molecular Function	GO:0000976	8	transcription regulatory region sequence-specific DNA binding	0.00864816	Q8NI51	335	1.578	Up	0.00022197	K	Transcriptional repressor CTCFL OS=Homo sapiens OX=9606 GN=CTCFL PE=1 SV=2	CTCFL	0.999974	0.0106656	55.314	YK(1)HTHEKPFK	4	1.7238	1	0.752	0.764	0.724	1.237	1.189	1.108
Molecular Function	GO:0000976	8	transcription regulatory region sequence-specific DNA binding	0.00864816	Q9UQR1	211	2.294	Up	2.0082e-05	K	Zinc finger protein 148 OS=Homo sapiens OX=9606 GN=ZNF148 PE=1 SV=2	ZNF148	1	0.0270936	63.816	FIQK(1)YLLQR	2	2.8693	1	0.547	0.593	0.555	1.247	1.282	1.36
Molecular Function	GO:0000976	8	transcription regulatory region sequence-specific DNA binding	0.00864816	O43707	779	1.506	Up	4.621e-06	K	Alpha-actinin-4 OS=Homo sapiens OX=9606 GN=ACTN4 PE=1 SV=2	ACTN4	1	2.1119e-07	92.098	ASFNHFDK(1)DHGGALGPEEFK	4	-0.48137	1	0.769	0.755	0.788	1.156	1.148	1.177
Molecular Function	GO:0000976	8	transcription regulatory region sequence-specific DNA binding	0.00864816	P26583	3	2.956	Up	1.481e-06	K	High mobility group protein B2 OS=Homo sapiens OX=9606 GN=HMGB2 PE=1 SV=2	HMGB2	0.999989	0.00434355	72.928	GK(1)GDPNKPR	3	-2.3564	2	0.457	0.487	0.444	1.378	1.343	1.382
Molecular Function	GO:0000976	8	transcription regulatory region sequence-specific DNA binding	0.00864816	P17480	384	2.344	Up	9.0789e-07	K	Nucleolar transcription factor 1 OS=Homo sapiens OX=9606 GN=UBTF PE=1 SV=1	UBTF	1	0.0263718	91.906	MLNINK(1)K	2	-1.1699	1	0.56	0.552	0.558	1.343	1.257	1.315
Molecular Function	GO:0000976	8	transcription regulatory region sequence-specific DNA binding	0.00864816	P11387	252	1.611	Up	0.0086001	K	DNA topoisomerase 1 OS=Homo sapiens OX=9606 GN=TOP1 PE=1 SV=2	TOP1	1	0.00441055	51.771	LSPK(1)AEEVATFFAK	3	-3.501	1	0.684	0.692	0.831	1.198	1.332	1.025
Molecular Function	GO:0000976	8	transcription regulatory region sequence-specific DNA binding	0.00864816	P11387	218	1.572	Up	0.0049752	K	DNA topoisomerase 1 OS=Homo sapiens OX=9606 GN=TOP1 PE=1 SV=2	TOP1	1	0.00578621	85.212	WK(1)FLEHK	3	-0.5485	1	0.654	0.728	0.858	1.154	1.144	1.224
Molecular Function	GO:0000976	8	transcription regulatory region sequence-specific DNA binding	0.00864816	Q92793	1811	7.596	Up	0.00094031	K	CREB-binding protein OS=Homo sapiens OX=9606 GN=CREBBP PE=1 SV=3	CREBBP	1	0.00377762	83.182	K(1)TNGGCPVCK	2	0.18561	1	0.185	0.196	0.228	1.546	1.535	1.545
Molecular Function	GO:0000976	8	transcription regulatory region sequence-specific DNA binding	0.00864816	P0C0S5	8	2.197	Up	4.9094e-07	K	Histone H2A.Z OS=Homo sapiens OX=9606 GN=H2AZ1 PE=1 SV=2	H2AZ1	1	2.41356e-07	111.64	AGK(1)DSGK(1)AK(1)TK	2	0.79948	12	0.591	0.582	0.583	1.323	1.257	1.278
Molecular Function	GO:0000976	8	transcription regulatory region sequence-specific DNA binding	0.00864816	P0C0S5	12	2.225	Up	3.9617e-07	K	Histone H2A.Z OS=Homo sapiens OX=9606 GN=H2AZ1 PE=1 SV=2	H2AZ1	1	2.41356e-07	111.64	AGK(1)DSGK(1)AK(1)TK	2	0.79948	10	0.585	0.579	0.575	1.326	1.264	1.279
Molecular Function	GO:0000976	8	transcription regulatory region sequence-specific DNA binding	0.00864816	P0C0S5	5	1.669	Up	5.8561e-05	K	Histone H2A.Z OS=Homo sapiens OX=9606 GN=H2AZ1 PE=1 SV=2	H2AZ1	1	2.41356e-07	111.64	AGGK(1)AGK(1)DSGK(1)AK(1)TK	2	0.11281	10	0.749	0.714	0.689	1.227	1.164	1.201
Molecular Function	GO:0000976	8	transcription regulatory region sequence-specific DNA binding	0.00864816	P0C0S5	14	2.729	Up	2.1717e-06	K	Histone H2A.Z OS=Homo sapiens OX=9606 GN=H2AZ1 PE=1 SV=2	H2AZ1	1	2.41356e-07	106.57	AGK(1)DSGK(1)AK(1)TK	2	0.79948	4	0.511	0.491	0.48	1.402	1.295	1.348
Molecular Function	GO:0000976	8	transcription regulatory region sequence-specific DNA binding	0.00864816	O94916	259	7.661	Up	1.5626e-06	K	Nuclear factor of activated T-cells 5 OS=Homo sapiens OX=9606 GN=NFAT5 PE=1 SV=1	NFAT5	1	0.038802	41.695	AGNGTLENQK(1)GTGVK(1)K	3	2.9694	1	0.192	0.214	0.198	1.463	1.681	1.483
Molecular Function	GO:0000976	8	transcription regulatory region sequence-specific DNA binding	0.00864816	O94916	264	7.661	Up	1.5626e-06	K	Nuclear factor of activated T-cells 5 OS=Homo sapiens OX=9606 GN=NFAT5 PE=1 SV=1	NFAT5	1	0.038802	41.695	AGNGTLENQK(1)GTGVK(1)K	3	2.9694	1	0.192	0.214	0.198	1.463	1.681	1.483
Molecular Function	GO:0000976	8	transcription regulatory region sequence-specific DNA binding	0.00864816	Q96T88	546	1.987	Up	0.0040585	K	E3 ubiquitin-protein ligase UHRF1 OS=Homo sapiens OX=9606 GN=UHRF1 PE=1 SV=1	UHRF1	1	0.000183326	96.059	NSK(1)YAPAEGNR	2	0.1761	1	0.675	0.581	0.638	1.244	1.265	1.255
Molecular Function	GO:1990837	7	sequence-specific double-stranded DNA binding	0.0338844	P07910	176	1.934	Up	2.1133e-05	K	Heterogeneous nuclear ribonucleoproteins C1/C2 OS=Homo sapiens OX=9606 GN=HNRNPC PE=1 SV=4	HNRNPC	1	4.37087e-06	137.4	SGFNSK(1)SGQR	2	0.17987	2	0.61	0.654	0.667	1.26	1.219	1.256
Molecular Function	GO:1990837	7	sequence-specific double-stranded DNA binding	0.0338844	Q09472	1769	4.035	Up	2.2499e-07	K	Histone acetyltransferase p300 OS=Homo sapiens OX=9606 GN=EP300 PE=1 SV=2	EP300	1	1.89332e-49	208.56	VVQHTK(1)GCK(1)R	2	0.47995	5	0.357	0.351	0.363	1.501	1.405	1.415
Molecular Function	GO:1990837	7	sequence-specific double-stranded DNA binding	0.0338844	Q09472	1772	11.928	Up	3.2215e-07	K	Histone acetyltransferase p300 OS=Homo sapiens OX=9606 GN=EP300 PE=1 SV=2	EP300	1	1.89332e-49	208.56	VVQHTK(1)GCK(1)R	2	0.47995	3	0.123	0.136	0.141	1.65	1.565	1.556
Molecular Function	GO:1990837	7	sequence-specific double-stranded DNA binding	0.0338844	Q09472	1762	7.585	Up	0.00119748	K	Histone acetyltransferase p300 OS=Homo sapiens OX=9606 GN=EP300 PE=1 SV=2	EP300	1	2.32223e-16	145.52	NANCSLPSCQK(1)MK(1)R	2	-1.3586	2	0.201	0.229	0.18	1.533	1.572	1.522
Molecular Function	GO:1990837	7	sequence-specific double-stranded DNA binding	0.0338844	Q09472	1774	3.958	Up	0.0092049	K	Histone acetyltransferase p300 OS=Homo sapiens OX=9606 GN=EP300 PE=1 SV=2	EP300	1	0.000167046	115.33	K(1)TNGGCPICK	3	-1.4801	4	0.287	0.344	0.456	1.437	1.433	1.432
Molecular Function	GO:1990837	7	sequence-specific double-stranded DNA binding	0.0338844	Q09472	1704	1.891	Up	5.0177e-07	K	Histone acetyltransferase p300 OS=Homo sapiens OX=9606 GN=EP300 PE=1 SV=2	EP300	1	2.47609e-10	80.688	NHDHK(1)MEK(1)LGLGLDDESNNQQAAATQSPGDSR	4	4.3749	6	0.642	0.664	0.659	1.234	1.257	1.224
Molecular Function	GO:1990837	7	sequence-specific double-stranded DNA binding	0.0338844	Q09472	1760	1.885	Up	3.5127e-06	K	Histone acetyltransferase p300 OS=Homo sapiens OX=9606 GN=EP300 PE=1 SV=2	EP300	1	2.32223e-16	145.52	NANCSLPSCQK(1)MK(1)R	2	-1.3586	5	0.642	0.648	0.679	1.223	1.266	1.222
Molecular Function	GO:1990837	7	sequence-specific double-stranded DNA binding	0.0338844	Q8NI51	335	1.578	Up	0.00022197	K	Transcriptional repressor CTCFL OS=Homo sapiens OX=9606 GN=CTCFL PE=1 SV=2	CTCFL	0.999974	0.0106656	55.314	YK(1)HTHEKPFK	4	1.7238	1	0.752	0.764	0.724	1.237	1.189	1.108
Molecular Function	GO:1990837	7	sequence-specific double-stranded DNA binding	0.0338844	Q9UQR1	211	2.294	Up	2.0082e-05	K	Zinc finger protein 148 OS=Homo sapiens OX=9606 GN=ZNF148 PE=1 SV=2	ZNF148	1	0.0270936	63.816	FIQK(1)YLLQR	2	2.8693	1	0.547	0.593	0.555	1.247	1.282	1.36
Molecular Function	GO:1990837	7	sequence-specific double-stranded DNA binding	0.0338844	O43707	779	1.506	Up	4.621e-06	K	Alpha-actinin-4 OS=Homo sapiens OX=9606 GN=ACTN4 PE=1 SV=2	ACTN4	1	2.1119e-07	92.098	ASFNHFDK(1)DHGGALGPEEFK	4	-0.48137	1	0.769	0.755	0.788	1.156	1.148	1.177
Molecular Function	GO:1990837	7	sequence-specific double-stranded DNA binding	0.0338844	P26583	3	2.956	Up	1.481e-06	K	High mobility group protein B2 OS=Homo sapiens OX=9606 GN=HMGB2 PE=1 SV=2	HMGB2	0.999989	0.00434355	72.928	GK(1)GDPNKPR	3	-2.3564	2	0.457	0.487	0.444	1.378	1.343	1.382
Molecular Function	GO:1990837	7	sequence-specific double-stranded DNA binding	0.0338844	P17480	384	2.344	Up	9.0789e-07	K	Nucleolar transcription factor 1 OS=Homo sapiens OX=9606 GN=UBTF PE=1 SV=1	UBTF	1	0.0263718	91.906	MLNINK(1)K	2	-1.1699	1	0.56	0.552	0.558	1.343	1.257	1.315
Molecular Function	GO:1990837	7	sequence-specific double-stranded DNA binding	0.0338844	P11387	252	1.611	Up	0.0086001	K	DNA topoisomerase 1 OS=Homo sapiens OX=9606 GN=TOP1 PE=1 SV=2	TOP1	1	0.00441055	51.771	LSPK(1)AEEVATFFAK	3	-3.501	1	0.684	0.692	0.831	1.198	1.332	1.025
Molecular Function	GO:1990837	7	sequence-specific double-stranded DNA binding	0.0338844	P11387	218	1.572	Up	0.0049752	K	DNA topoisomerase 1 OS=Homo sapiens OX=9606 GN=TOP1 PE=1 SV=2	TOP1	1	0.00578621	85.212	WK(1)FLEHK	3	-0.5485	1	0.654	0.728	0.858	1.154	1.144	1.224
Molecular Function	GO:1990837	7	sequence-specific double-stranded DNA binding	0.0338844	Q92793	1811	7.596	Up	0.00094031	K	CREB-binding protein OS=Homo sapiens OX=9606 GN=CREBBP PE=1 SV=3	CREBBP	1	0.00377762	83.182	K(1)TNGGCPVCK	2	0.18561	1	0.185	0.196	0.228	1.546	1.535	1.545
Molecular Function	GO:1990837	7	sequence-specific double-stranded DNA binding	0.0338844	P0C0S5	8	2.197	Up	4.9094e-07	K	Histone H2A.Z OS=Homo sapiens OX=9606 GN=H2AZ1 PE=1 SV=2	H2AZ1	1	2.41356e-07	111.64	AGK(1)DSGK(1)AK(1)TK	2	0.79948	12	0.591	0.582	0.583	1.323	1.257	1.278
Molecular Function	GO:1990837	7	sequence-specific double-stranded DNA binding	0.0338844	P0C0S5	12	2.225	Up	3.9617e-07	K	Histone H2A.Z OS=Homo sapiens OX=9606 GN=H2AZ1 PE=1 SV=2	H2AZ1	1	2.41356e-07	111.64	AGK(1)DSGK(1)AK(1)TK	2	0.79948	10	0.585	0.579	0.575	1.326	1.264	1.279
Molecular Function	GO:1990837	7	sequence-specific double-stranded DNA binding	0.0338844	P0C0S5	5	1.669	Up	5.8561e-05	K	Histone H2A.Z OS=Homo sapiens OX=9606 GN=H2AZ1 PE=1 SV=2	H2AZ1	1	2.41356e-07	111.64	AGGK(1)AGK(1)DSGK(1)AK(1)TK	2	0.11281	10	0.749	0.714	0.689	1.227	1.164	1.201
Molecular Function	GO:1990837	7	sequence-specific double-stranded DNA binding	0.0338844	P0C0S5	14	2.729	Up	2.1717e-06	K	Histone H2A.Z OS=Homo sapiens OX=9606 GN=H2AZ1 PE=1 SV=2	H2AZ1	1	2.41356e-07	106.57	AGK(1)DSGK(1)AK(1)TK	2	0.79948	4	0.511	0.491	0.48	1.402	1.295	1.348
Molecular Function	GO:1990837	7	sequence-specific double-stranded DNA binding	0.0338844	O94916	259	7.661	Up	1.5626e-06	K	Nuclear factor of activated T-cells 5 OS=Homo sapiens OX=9606 GN=NFAT5 PE=1 SV=1	NFAT5	1	0.038802	41.695	AGNGTLENQK(1)GTGVK(1)K	3	2.9694	1	0.192	0.214	0.198	1.463	1.681	1.483
Molecular Function	GO:1990837	7	sequence-specific double-stranded DNA binding	0.0338844	O94916	264	7.661	Up	1.5626e-06	K	Nuclear factor of activated T-cells 5 OS=Homo sapiens OX=9606 GN=NFAT5 PE=1 SV=1	NFAT5	1	0.038802	41.695	AGNGTLENQK(1)GTGVK(1)K	3	2.9694	1	0.192	0.214	0.198	1.463	1.681	1.483
Molecular Function	GO:1990837	7	sequence-specific double-stranded DNA binding	0.0338844	Q96T88	546	1.987	Up	0.0040585	K	E3 ubiquitin-protein ligase UHRF1 OS=Homo sapiens OX=9606 GN=UHRF1 PE=1 SV=1	UHRF1	1	0.000183326	96.059	NSK(1)YAPAEGNR	2	0.1761	1	0.675	0.581	0.638	1.244	1.265	1.255
Molecular Function	GO:0002039	4	p53 binding	0.206094	Q09472	1769	4.035	Up	2.2499e-07	K	Histone acetyltransferase p300 OS=Homo sapiens OX=9606 GN=EP300 PE=1 SV=2	EP300	1	1.89332e-49	208.56	VVQHTK(1)GCK(1)R	2	0.47995	5	0.357	0.351	0.363	1.501	1.405	1.415
Molecular Function	GO:0002039	4	p53 binding	0.206094	Q09472	1772	11.928	Up	3.2215e-07	K	Histone acetyltransferase p300 OS=Homo sapiens OX=9606 GN=EP300 PE=1 SV=2	EP300	1	1.89332e-49	208.56	VVQHTK(1)GCK(1)R	2	0.47995	3	0.123	0.136	0.141	1.65	1.565	1.556
Molecular Function	GO:0002039	4	p53 binding	0.206094	Q09472	1762	7.585	Up	0.00119748	K	Histone acetyltransferase p300 OS=Homo sapiens OX=9606 GN=EP300 PE=1 SV=2	EP300	1	2.32223e-16	145.52	NANCSLPSCQK(1)MK(1)R	2	-1.3586	2	0.201	0.229	0.18	1.533	1.572	1.522
Molecular Function	GO:0002039	4	p53 binding	0.206094	Q09472	1774	3.958	Up	0.0092049	K	Histone acetyltransferase p300 OS=Homo sapiens OX=9606 GN=EP300 PE=1 SV=2	EP300	1	0.000167046	115.33	K(1)TNGGCPICK	3	-1.4801	4	0.287	0.344	0.456	1.437	1.433	1.432
Molecular Function	GO:0002039	4	p53 binding	0.206094	Q09472	1704	1.891	Up	5.0177e-07	K	Histone acetyltransferase p300 OS=Homo sapiens OX=9606 GN=EP300 PE=1 SV=2	EP300	1	2.47609e-10	80.688	NHDHK(1)MEK(1)LGLGLDDESNNQQAAATQSPGDSR	4	4.3749	6	0.642	0.664	0.659	1.234	1.257	1.224
Molecular Function	GO:0002039	4	p53 binding	0.206094	Q09472	1760	1.885	Up	3.5127e-06	K	Histone acetyltransferase p300 OS=Homo sapiens OX=9606 GN=EP300 PE=1 SV=2	EP300	1	2.32223e-16	145.52	NANCSLPSCQK(1)MK(1)R	2	-1.3586	5	0.642	0.648	0.679	1.223	1.266	1.222
Molecular Function	GO:0002039	4	p53 binding	0.206094	P13639	32	1.652	Up	0.0028208	K	Elongation factor 2 OS=Homo sapiens OX=9606 GN=EEF2 PE=1 SV=4	EEF2	1	0.000910029	50.858	NMSVIAHVDHGK(1)STLTDSLVCK	4	-0.77941	1	0.655	0.728	0.777	1.058	1.229	1.282
Molecular Function	GO:0002039	4	p53 binding	0.206094	Q92793	1811	7.596	Up	0.00094031	K	CREB-binding protein OS=Homo sapiens OX=9606 GN=CREBBP PE=1 SV=3	CREBBP	1	0.00377762	83.182	K(1)TNGGCPVCK	2	0.18561	1	0.185	0.196	0.228	1.546	1.535	1.545
Molecular Function	GO:0001948	4	glycoprotein binding	0.0471117	P21333	994	1.525	Up	1.9772e-05	K	Filamin-A OS=Homo sapiens OX=9606 GN=FLNA PE=1 SV=4	FLNA	1	0.00346172	85.813	DQEFTVK(1)SK	3	-0.051795	2	0.786	0.743	0.763	1.155	1.183	1.157
Molecular Function	GO:0001948	4	glycoprotein binding	0.0471117	P27824	87	1.514	Up	0.00095527	K	Calnexin OS=Homo sapiens OX=9606 GN=CANX PE=1 SV=2	CANX	1	0.014782	46.88	GTLSGWILSK(1)AK	3	-0.67335	1	0.807	0.786	0.712	1.226	1.112	1.152
Molecular Function	GO:0001948	4	glycoprotein binding	0.0471117	P02749	303	21.341	Up	4.0011e-06	K	Beta-2-glycoprotein 1 OS=Homo sapiens OX=9606 GN=APOH PE=1 SV=3	APOH	1	7.12912e-09	145.31	VSFFCK(1)NK(1)EK	2	-0.45882	1	0.064	0.074	0.091	1.696	1.57	1.621
Molecular Function	GO:0001948	4	glycoprotein binding	0.0471117	P02749	301	6.988	Up	4.3035e-08	K	Beta-2-glycoprotein 1 OS=Homo sapiens OX=9606 GN=APOH PE=1 SV=3	APOH	1	7.12912e-09	145.31	VSFFCK(1)NK(1)EK	2	-0.45882	7	0.214	0.222	0.222	1.585	1.496	1.517
Molecular Function	GO:0001948	4	glycoprotein binding	0.0471117	O75487	44	1.652	Up	4.6607e-06	K	Glypican-4 OS=Homo sapiens OX=9606 GN=GPC4 PE=1 SV=4	GPC4	1	1.65724e-10	118.72	GFNK(1)NDAPLHEINGDHLK	4	0.22408	2	0.727	0.708	0.733	1.228	1.179	1.174
Molecular Function	GO:0001948	4	glycoprotein binding	0.0471117	P11021	553	1.584	Up	0.00051646	K	Endoplasmic reticulum chaperone BiP OS=Homo sapiens OX=9606 GN=HSPA5 PE=1 SV=2	HSPA5	1	0.0198462	68.915	FAEEDK(1)K	3	0.25072	1	0.739	0.758	0.737	1.273	1.094	1.171
Molecular Function	GO:0001948	4	glycoprotein binding	0.0471117	P11021	352	1.593	Up	7.6558e-05	K	Endoplasmic reticulum chaperone BiP OS=Homo sapiens OX=9606 GN=HSPA5 PE=1 SV=2	HSPA5	1	0.000769989	104.22	VLEDSDLK(1)K	3	2.7364	2	0.731	0.73	0.76	1.123	1.214	1.2
Molecular Function	GO:0048487	6	beta-tubulin binding	0.207279	P15291	348	1.811	Up	0.0005237	K	Beta-1,4-galactosyltransferase 1 OS=Homo sapiens OX=9606 GN=B4GALT1 PE=1 SV=5	B4GALT1	1	0.0295481	72.23	K(1)NEPNPQR	2	0.42742	1	0.751	0.632	0.648	1.279	1.22	1.18
Molecular Function	GO:0048487	6	beta-tubulin binding	0.207279	P42704	1357	1.508	Up	0.00045917	K	Leucine-rich PPR motif-containing protein, mitochondrial OS=Homo sapiens OX=9606 GN=LRPPRC PE=1 SV=3	LRPPRC	1	0.0295481	72.23	LDDLFLK(1)R	2	0.38254	1	0.752	0.803	0.752	1.115	1.129	1.235
Molecular Function	GO:0035326	8	enhancer binding	0.113171	P07910	176	1.934	Up	2.1133e-05	K	Heterogeneous nuclear ribonucleoproteins C1/C2 OS=Homo sapiens OX=9606 GN=HNRNPC PE=1 SV=4	HNRNPC	1	4.37087e-06	137.4	SGFNSK(1)SGQR	2	0.17987	2	0.61	0.654	0.667	1.26	1.219	1.256
Molecular Function	GO:0035326	8	enhancer binding	0.113171	P26583	3	2.956	Up	1.481e-06	K	High mobility group protein B2 OS=Homo sapiens OX=9606 GN=HMGB2 PE=1 SV=2	HMGB2	0.999989	0.00434355	72.928	GK(1)GDPNKPR	3	-2.3564	2	0.457	0.487	0.444	1.378	1.343	1.382
Molecular Function	GO:0035326	8	enhancer binding	0.113171	P0C0S5	8	2.197	Up	4.9094e-07	K	Histone H2A.Z OS=Homo sapiens OX=9606 GN=H2AZ1 PE=1 SV=2	H2AZ1	1	2.41356e-07	111.64	AGK(1)DSGK(1)AK(1)TK	2	0.79948	12	0.591	0.582	0.583	1.323	1.257	1.278
Molecular Function	GO:0035326	8	enhancer binding	0.113171	P0C0S5	12	2.225	Up	3.9617e-07	K	Histone H2A.Z OS=Homo sapiens OX=9606 GN=H2AZ1 PE=1 SV=2	H2AZ1	1	2.41356e-07	111.64	AGK(1)DSGK(1)AK(1)TK	2	0.79948	10	0.585	0.579	0.575	1.326	1.264	1.279
Molecular Function	GO:0035326	8	enhancer binding	0.113171	P0C0S5	5	1.669	Up	5.8561e-05	K	Histone H2A.Z OS=Homo sapiens OX=9606 GN=H2AZ1 PE=1 SV=2	H2AZ1	1	2.41356e-07	111.64	AGGK(1)AGK(1)DSGK(1)AK(1)TK	2	0.11281	10	0.749	0.714	0.689	1.227	1.164	1.201
Molecular Function	GO:0035326	8	enhancer binding	0.113171	P0C0S5	14	2.729	Up	2.1717e-06	K	Histone H2A.Z OS=Homo sapiens OX=9606 GN=H2AZ1 PE=1 SV=2	H2AZ1	1	2.41356e-07	106.57	AGK(1)DSGK(1)AK(1)TK	2	0.79948	4	0.511	0.491	0.48	1.402	1.295	1.348
Molecular Function	GO:0043531	9	ADP binding	0.275061	P36776	367	1.766	Up	1.2118e-06	K	Lon protease homolog, mitochondrial OS=Homo sapiens OX=9606 GN=LONP1 PE=1 SV=2	LONP1	1	0.0134532	94.114	ALSLLK(1)K	2	0.1015	1	0.679	0.702	0.684	1.21	1.197	1.239
Molecular Function	GO:0043531	9	ADP binding	0.275061	P35580	1782	1.618	Up	0.00133836	K	Myosin-10 OS=Homo sapiens OX=9606 GN=MYH10 PE=1 SV=3	MYH10	1	0.000848405	90.614	SAAQK(1)SDNAR	2	-0.18483	1	0.811	0.675	0.713	1.145	1.249	1.164
Molecular Function	GO:0043531	9	ADP binding	0.275061	P55072	651	1.786	Up	0.0026628	K	Transitional endoplasmic reticulum ATPase OS=Homo sapiens OX=9606 GN=VCP PE=1 SV=4	VCP	1	0.0111412	42.095	LDQLIYIPLPDEK(1)SR	3	-0.55872	1	0.764	0.576	0.709	1.167	1.218	1.275
Molecular Function	GO:0016769	4	transferase activity, transferring nitrogenous groups	0.303363	O94808	17	8.073	Up	1.7576e-06	K	Glutamine--fructose-6-phosphate aminotransferase [isomerizing] 2 OS=Homo sapiens OX=9606 GN=GFPT2 PE=1 SV=3	GFPT2	1	0.00410597	83.862	K(1)EIFETLIK	2	-0.77241	3	0.206	0.199	0.171	1.548	1.576	1.526
Molecular Function	GO:0016769	4	transferase activity, transferring nitrogenous groups	0.303363	P17174	97	1.571	Up	0.0062823	K	Aspartate aminotransferase, cytoplasmic OS=Homo sapiens OX=9606 GN=GOT1 PE=1 SV=3	GOT1	1	0.000526115	69.03	LALGDDSPALK(1)EK	3	4.0464	1	0.768	0.717	0.76	1.092	1.374	1.06
Molecular Function	GO:0005516	4	calmodulin binding	0.121423	Q13813	296	1.717	Up	0.0100175	K	Spectrin alpha chain, non-erythrocytic 1 OS=Homo sapiens OX=9606 GN=SPTAN1 PE=1 SV=3	SPTAN1	1	0.0243338	65.246	K(1)HEGLER	3	1.0588	1	0.744	0.691	0.678	1.258	1.405	0.965
Molecular Function	GO:0005516	4	calmodulin binding	0.121423	P35580	1782	1.618	Up	0.00133836	K	Myosin-10 OS=Homo sapiens OX=9606 GN=MYH10 PE=1 SV=3	MYH10	1	0.000848405	90.614	SAAQK(1)SDNAR	2	-0.18483	1	0.811	0.675	0.713	1.145	1.249	1.164
Molecular Function	GO:0005516	4	calmodulin binding	0.121423	O60869	43	1.525	Up	0.0052223	K	Endothelial differentiation-related factor 1 OS=Homo sapiens OX=9606 GN=EDF1 PE=1 SV=1	EDF1	1	0.0158941	80.219	K(1)WAAGQNK	2	-2.0176	1	0.763	0.767	0.761	1.153	1.109	1.231
Molecular Function	GO:0005516	4	calmodulin binding	0.121423	Q13557	268	2.448	Up	0.00064196	K	Calcium/calmodulin-dependent protein kinase type II subunit delta OS=Homo sapiens OX=9606 GN=CAMK2D PE=1 SV=3	CAMK2D	1	9.73432e-06	94.09	ITASEALK(1)HPWICQR	3	-2.1026	1	0.448	0.594	0.572	1.394	1.259	1.298
Molecular Function	GO:0005516	4	calmodulin binding	0.121423	P17844	33	1.57	Up	2.1671e-06	K	Probable ATP-dependent RNA helicase DDX5 OS=Homo sapiens OX=9606 GN=DDX5 PE=1 SV=1	DDX5	1	0.0114461	85.533	K(1)FGNPGEK	2	0.64993	1	0.756	0.73	0.76	1.172	1.17	1.184
Molecular Function	GO:0005516	4	calmodulin binding	0.121423	P17844	45	1.709	Up	0.00047944	K	Probable ATP-dependent RNA helicase DDX5 OS=Homo sapiens OX=9606 GN=DDX5 PE=1 SV=1	DDX5	1	0.0064221	68.657	K(1)WNLDELPK	3	0.20029	1	0.715	0.73	0.671	1.179	1.31	1.127
Molecular Function	GO:0042056	2	chemoattractant activity	0.0149761	P15692	149	1.52	Up	0.0183197	K	Vascular endothelial growth factor A OS=Homo sapiens OX=9606 GN=VEGFA PE=1 SV=2	VEGFA	1	0.0158118	68.016	GK(1)GK(1)GQK(1)R	3	0.20842	1	0.619	0.836	0.835	1.054	1.197	1.23
Molecular Function	GO:0042056	2	chemoattractant activity	0.0149761	P15692	147	1.52	Up	0.0183197	K	Vascular endothelial growth factor A OS=Homo sapiens OX=9606 GN=VEGFA PE=1 SV=2	VEGFA	1	0.0158118	68.016	GK(1)GK(1)GQK(1)R	3	0.20842	1	0.619	0.836	0.835	1.054	1.197	1.23
Molecular Function	GO:0042056	2	chemoattractant activity	0.0149761	P15692	152	1.52	Up	0.0183197	K	Vascular endothelial growth factor A OS=Homo sapiens OX=9606 GN=VEGFA PE=1 SV=2	VEGFA	1	0.0158118	68.016	GK(1)GK(1)GQK(1)R	3	0.20842	1	0.619	0.836	0.835	1.054	1.197	1.23
Molecular Function	GO:0042056	2	chemoattractant activity	0.0149761	P26583	3	2.956	Up	1.481e-06	K	High mobility group protein B2 OS=Homo sapiens OX=9606 GN=HMGB2 PE=1 SV=2	HMGB2	0.999989	0.00434355	72.928	GK(1)GDPNKPR	3	-2.3564	2	0.457	0.487	0.444	1.378	1.343	1.382
Molecular Function	GO:0042056	2	chemoattractant activity	0.0149761	P09429	90	1.761	Up	0.000121985	K	High mobility group protein B1 OS=Homo sapiens OX=9606 GN=HMGB1 PE=1 SV=3	HMGB1	1	0.014499	80.688	FK(1)DPNAPK	2	-0.291	2	0.677	0.691	0.704	1.289	1.223	1.136
Molecular Function	GO:0001078	6	transcriptional repressor activity, RNA polymerase II core promoter proximal region sequence-specific binding	0.116075	Q9UQR1	211	2.294	Up	2.0082e-05	K	Zinc finger protein 148 OS=Homo sapiens OX=9606 GN=ZNF148 PE=1 SV=2	ZNF148	1	0.0270936	63.816	FIQK(1)YLLQR	2	2.8693	1	0.547	0.593	0.555	1.247	1.282	1.36
Molecular Function	GO:0001078	6	transcriptional repressor activity, RNA polymerase II core promoter proximal region sequence-specific binding	0.116075	Q92793	1811	7.596	Up	0.00094031	K	CREB-binding protein OS=Homo sapiens OX=9606 GN=CREBBP PE=1 SV=3	CREBBP	1	0.00377762	83.182	K(1)TNGGCPVCK	2	0.18561	1	0.185	0.196	0.228	1.546	1.535	1.545
Molecular Function	GO:0022836	6	gated channel activity	0.207279	Q9Y696	146	1.747	Up	0.000158095	K	Chloride intracellular channel protein 4 OS=Homo sapiens OX=9606 GN=CLIC4 PE=1 SV=4	CLIC4	1	0.00711757	91.867	GLLK(1)TLQK	2	0.55617	1	0.693	0.685	0.705	1.273	1.121	1.245
Molecular Function	GO:0022836	6	gated channel activity	0.207279	P21796	61	1.877	Up	2.673e-06	K	Voltage-dependent anion-selective channel protein 1 OS=Homo sapiens OX=9606 GN=VDAC1 PE=1 SV=2	VDAC1	1	0.00011548	117.25	VTGSLETK(1)YR	3	1.0352	3	0.663	0.636	0.677	1.244	1.244	1.221
Molecular Function	GO:0022836	6	gated channel activity	0.207279	P21796	20	1.506	Up	6.0692e-05	K	Voltage-dependent anion-selective channel protein 1 OS=Homo sapiens OX=9606 GN=VDAC1 PE=1 SV=2	VDAC1	1	5.63016e-11	131.66	DVFTK(1)GYGFGLIK	2	0.76596	2	0.765	0.794	0.754	1.198	1.157	1.128
Molecular Function	GO:0003690	6	double-stranded DNA binding	0.0204345	P07910	176	1.934	Up	2.1133e-05	K	Heterogeneous nuclear ribonucleoproteins C1/C2 OS=Homo sapiens OX=9606 GN=HNRNPC PE=1 SV=4	HNRNPC	1	4.37087e-06	137.4	SGFNSK(1)SGQR	2	0.17987	2	0.61	0.654	0.667	1.26	1.219	1.256
Molecular Function	GO:0003690	6	double-stranded DNA binding	0.0204345	P39748	375	1.672	Up	0.00041838	K	Flap endonuclease 1 OS=Homo sapiens OX=9606 GN=FEN1 PE=1 SV=1	FEN1	1	0.00781029	71.379	TGAAGK(1)FK	3	0.36582	1	0.705	0.708	0.735	1.166	1.305	1.121
Molecular Function	GO:0003690	6	double-stranded DNA binding	0.0204345	Q8NI51	335	1.578	Up	0.00022197	K	Transcriptional repressor CTCFL OS=Homo sapiens OX=9606 GN=CTCFL PE=1 SV=2	CTCFL	0.999974	0.0106656	55.314	YK(1)HTHEKPFK	4	1.7238	1	0.752	0.764	0.724	1.237	1.189	1.108
Molecular Function	GO:0003690	6	double-stranded DNA binding	0.0204345	O43707	779	1.506	Up	4.621e-06	K	Alpha-actinin-4 OS=Homo sapiens OX=9606 GN=ACTN4 PE=1 SV=2	ACTN4	1	2.1119e-07	92.098	ASFNHFDK(1)DHGGALGPEEFK	4	-0.48137	1	0.769	0.755	0.788	1.156	1.148	1.177
Molecular Function	GO:0003690	6	double-stranded DNA binding	0.0204345	P09429	90	1.761	Up	0.000121985	K	High mobility group protein B1 OS=Homo sapiens OX=9606 GN=HMGB1 PE=1 SV=3	HMGB1	1	0.014499	80.688	FK(1)DPNAPK	2	-0.291	2	0.677	0.691	0.704	1.289	1.223	1.136
Molecular Function	GO:0003690	6	double-stranded DNA binding	0.0204345	P78527	3642	1.51	Up	2.3019e-05	K	DNA-dependent protein kinase catalytic subunit OS=Homo sapiens OX=9606 GN=PRKDC PE=1 SV=3	PRKDC	1	0.0283698	49.715	EFDK(1)HFGK	3	0.53551	1	0.784	0.759	0.766	1.191	1.169	1.127
Molecular Function	GO:0003690	6	double-stranded DNA binding	0.0204345	O94916	259	7.661	Up	1.5626e-06	K	Nuclear factor of activated T-cells 5 OS=Homo sapiens OX=9606 GN=NFAT5 PE=1 SV=1	NFAT5	1	0.038802	41.695	AGNGTLENQK(1)GTGVK(1)K	3	2.9694	1	0.192	0.214	0.198	1.463	1.681	1.483
Molecular Function	GO:0003690	6	double-stranded DNA binding	0.0204345	O94916	264	7.661	Up	1.5626e-06	K	Nuclear factor of activated T-cells 5 OS=Homo sapiens OX=9606 GN=NFAT5 PE=1 SV=1	NFAT5	1	0.038802	41.695	AGNGTLENQK(1)GTGVK(1)K	3	2.9694	1	0.192	0.214	0.198	1.463	1.681	1.483
Molecular Function	GO:0003690	6	double-stranded DNA binding	0.0204345	Q96T88	546	1.987	Up	0.0040585	K	E3 ubiquitin-protein ligase UHRF1 OS=Homo sapiens OX=9606 GN=UHRF1 PE=1 SV=1	UHRF1	1	0.000183326	96.059	NSK(1)YAPAEGNR	2	0.1761	1	0.675	0.581	0.638	1.244	1.265	1.255
Molecular Function	GO:0003690	6	double-stranded DNA binding	0.0204345	Q09472	1769	4.035	Up	2.2499e-07	K	Histone acetyltransferase p300 OS=Homo sapiens OX=9606 GN=EP300 PE=1 SV=2	EP300	1	1.89332e-49	208.56	VVQHTK(1)GCK(1)R	2	0.47995	5	0.357	0.351	0.363	1.501	1.405	1.415
Molecular Function	GO:0003690	6	double-stranded DNA binding	0.0204345	Q09472	1772	11.928	Up	3.2215e-07	K	Histone acetyltransferase p300 OS=Homo sapiens OX=9606 GN=EP300 PE=1 SV=2	EP300	1	1.89332e-49	208.56	VVQHTK(1)GCK(1)R	2	0.47995	3	0.123	0.136	0.141	1.65	1.565	1.556
Molecular Function	GO:0003690	6	double-stranded DNA binding	0.0204345	Q09472	1762	7.585	Up	0.00119748	K	Histone acetyltransferase p300 OS=Homo sapiens OX=9606 GN=EP300 PE=1 SV=2	EP300	1	2.32223e-16	145.52	NANCSLPSCQK(1)MK(1)R	2	-1.3586	2	0.201	0.229	0.18	1.533	1.572	1.522
Molecular Function	GO:0003690	6	double-stranded DNA binding	0.0204345	Q09472	1774	3.958	Up	0.0092049	K	Histone acetyltransferase p300 OS=Homo sapiens OX=9606 GN=EP300 PE=1 SV=2	EP300	1	0.000167046	115.33	K(1)TNGGCPICK	3	-1.4801	4	0.287	0.344	0.456	1.437	1.433	1.432
Molecular Function	GO:0003690	6	double-stranded DNA binding	0.0204345	Q09472	1704	1.891	Up	5.0177e-07	K	Histone acetyltransferase p300 OS=Homo sapiens OX=9606 GN=EP300 PE=1 SV=2	EP300	1	2.47609e-10	80.688	NHDHK(1)MEK(1)LGLGLDDESNNQQAAATQSPGDSR	4	4.3749	6	0.642	0.664	0.659	1.234	1.257	1.224
Molecular Function	GO:0003690	6	double-stranded DNA binding	0.0204345	Q09472	1760	1.885	Up	3.5127e-06	K	Histone acetyltransferase p300 OS=Homo sapiens OX=9606 GN=EP300 PE=1 SV=2	EP300	1	2.32223e-16	145.52	NANCSLPSCQK(1)MK(1)R	2	-1.3586	5	0.642	0.648	0.679	1.223	1.266	1.222
Molecular Function	GO:0003690	6	double-stranded DNA binding	0.0204345	O15347	161	1.908	Up	1.7514e-05	K	High mobility group protein B3 OS=Homo sapiens OX=9606 GN=HMGB3 PE=1 SV=4	HMGB3	1	0.0120205	83.862	DVADYK(1)SK	2	-0.43322	1	0.626	0.65	0.676	1.259	1.256	1.209
Molecular Function	GO:0003690	6	double-stranded DNA binding	0.0204345	Q9UQR1	211	2.294	Up	2.0082e-05	K	Zinc finger protein 148 OS=Homo sapiens OX=9606 GN=ZNF148 PE=1 SV=2	ZNF148	1	0.0270936	63.816	FIQK(1)YLLQR	2	2.8693	1	0.547	0.593	0.555	1.247	1.282	1.36
Molecular Function	GO:0003690	6	double-stranded DNA binding	0.0204345	P17480	384	2.344	Up	9.0789e-07	K	Nucleolar transcription factor 1 OS=Homo sapiens OX=9606 GN=UBTF PE=1 SV=1	UBTF	1	0.0263718	91.906	MLNINK(1)K	2	-1.1699	1	0.56	0.552	0.558	1.343	1.257	1.315
Molecular Function	GO:0003690	6	double-stranded DNA binding	0.0204345	P26583	3	2.956	Up	1.481e-06	K	High mobility group protein B2 OS=Homo sapiens OX=9606 GN=HMGB2 PE=1 SV=2	HMGB2	0.999989	0.00434355	72.928	GK(1)GDPNKPR	3	-2.3564	2	0.457	0.487	0.444	1.378	1.343	1.382
Molecular Function	GO:0003690	6	double-stranded DNA binding	0.0204345	P11387	252	1.611	Up	0.0086001	K	DNA topoisomerase 1 OS=Homo sapiens OX=9606 GN=TOP1 PE=1 SV=2	TOP1	1	0.00441055	51.771	LSPK(1)AEEVATFFAK	3	-3.501	1	0.684	0.692	0.831	1.198	1.332	1.025
Molecular Function	GO:0003690	6	double-stranded DNA binding	0.0204345	P11387	218	1.572	Up	0.0049752	K	DNA topoisomerase 1 OS=Homo sapiens OX=9606 GN=TOP1 PE=1 SV=2	TOP1	1	0.00578621	85.212	WK(1)FLEHK	3	-0.5485	1	0.654	0.728	0.858	1.154	1.144	1.224
Molecular Function	GO:0003690	6	double-stranded DNA binding	0.0204345	P0C0S5	8	2.197	Up	4.9094e-07	K	Histone H2A.Z OS=Homo sapiens OX=9606 GN=H2AZ1 PE=1 SV=2	H2AZ1	1	2.41356e-07	111.64	AGK(1)DSGK(1)AK(1)TK	2	0.79948	12	0.591	0.582	0.583	1.323	1.257	1.278
Molecular Function	GO:0003690	6	double-stranded DNA binding	0.0204345	P0C0S5	12	2.225	Up	3.9617e-07	K	Histone H2A.Z OS=Homo sapiens OX=9606 GN=H2AZ1 PE=1 SV=2	H2AZ1	1	2.41356e-07	111.64	AGK(1)DSGK(1)AK(1)TK	2	0.79948	10	0.585	0.579	0.575	1.326	1.264	1.279
Molecular Function	GO:0003690	6	double-stranded DNA binding	0.0204345	P0C0S5	5	1.669	Up	5.8561e-05	K	Histone H2A.Z OS=Homo sapiens OX=9606 GN=H2AZ1 PE=1 SV=2	H2AZ1	1	2.41356e-07	111.64	AGGK(1)AGK(1)DSGK(1)AK(1)TK	2	0.11281	10	0.749	0.714	0.689	1.227	1.164	1.201
Molecular Function	GO:0003690	6	double-stranded DNA binding	0.0204345	P0C0S5	14	2.729	Up	2.1717e-06	K	Histone H2A.Z OS=Homo sapiens OX=9606 GN=H2AZ1 PE=1 SV=2	H2AZ1	1	2.41356e-07	106.57	AGK(1)DSGK(1)AK(1)TK	2	0.79948	4	0.511	0.491	0.48	1.402	1.295	1.348
Molecular Function	GO:0003690	6	double-stranded DNA binding	0.0204345	Q92793	1811	7.596	Up	0.00094031	K	CREB-binding protein OS=Homo sapiens OX=9606 GN=CREBBP PE=1 SV=3	CREBBP	1	0.00377762	83.182	K(1)TNGGCPVCK	2	0.18561	1	0.185	0.196	0.228	1.546	1.535	1.545
Molecular Function	GO:0099106	4	ion channel regulator activity	0.0272698	P21333	994	1.525	Up	1.9772e-05	K	Filamin-A OS=Homo sapiens OX=9606 GN=FLNA PE=1 SV=4	FLNA	1	0.00346172	85.813	DQEFTVK(1)SK	3	-0.051795	2	0.786	0.743	0.763	1.155	1.183	1.157
Molecular Function	GO:0099106	4	ion channel regulator activity	0.0272698	Q13557	268	2.448	Up	0.00064196	K	Calcium/calmodulin-dependent protein kinase type II subunit delta OS=Homo sapiens OX=9606 GN=CAMK2D PE=1 SV=3	CAMK2D	1	9.73432e-06	94.09	ITASEALK(1)HPWICQR	3	-2.1026	1	0.448	0.594	0.572	1.394	1.259	1.298
Molecular Function	GO:0099106	4	ion channel regulator activity	0.0272698	Q03135	57	1.523	Up	0.0012176	K	Caveolin-1 OS=Homo sapiens OX=9606 GN=CAV1 PE=1 SV=4	CAV1	1	0.00201216	67.997	DPK(1)HLNDDVVK	3	1.0261	1	0.694	0.781	0.816	1.145	1.139	1.206
Molecular Function	GO:0043014	6	alpha-tubulin binding	0.01491	P15291	348	1.811	Up	0.0005237	K	Beta-1,4-galactosyltransferase 1 OS=Homo sapiens OX=9606 GN=B4GALT1 PE=1 SV=5	B4GALT1	1	0.0295481	72.23	K(1)NEPNPQR	2	0.42742	1	0.751	0.632	0.648	1.279	1.22	1.18
Molecular Function	GO:0043014	6	alpha-tubulin binding	0.01491	Q92598	135	1.659	Up	0.00020381	K	Heat shock protein 105 kDa OS=Homo sapiens OX=9606 GN=HSPH1 PE=1 SV=1	HSPH1	1	1.99598e-06	72.585	K(1)PVTDCVISVPSFFTDAER	3	0.53078	1	0.698	0.742	0.722	1.273	1.184	1.129
Molecular Function	GO:0030170	5	pyridoxal phosphate binding	0.173283	P34897	200	1.553	Up	0.0024569	K	Serine hydroxymethyltransferase, mitochondrial OS=Homo sapiens OX=9606 GN=SHMT2 PE=1 SV=3	SHMT2	1	1.11032e-09	113.54	LNPK(1)TGLIDYNQLALTAR	3	-0.53359	1	0.671	0.753	0.836	1.158	1.146	1.206
Molecular Function	GO:0030170	5	pyridoxal phosphate binding	0.173283	P17174	97	1.571	Up	0.0062823	K	Aspartate aminotransferase, cytoplasmic OS=Homo sapiens OX=9606 GN=GOT1 PE=1 SV=3	GOT1	1	0.000526115	69.03	LALGDDSPALK(1)EK	3	4.0464	1	0.768	0.717	0.76	1.092	1.374	1.06
Molecular Function	GO:0030170	5	pyridoxal phosphate binding	0.173283	P13196	211	4.276	Up	0.0127581	K	5-aminolevulinate synthase, nonspecific, mitochondrial OS=Homo sapiens OX=9606 GN=ALAS1 PE=1 SV=2	ALAS1	1	0.00116209	113.41	K(1)NDHTYR	3	-0.80736	1	0.461	0.284	0.275	1.49	1.49	1.382
Molecular Function	GO:0005253	8	anion channel activity	0.116075	Q9Y696	146	1.747	Up	0.000158095	K	Chloride intracellular channel protein 4 OS=Homo sapiens OX=9606 GN=CLIC4 PE=1 SV=4	CLIC4	1	0.00711757	91.867	GLLK(1)TLQK	2	0.55617	1	0.693	0.685	0.705	1.273	1.121	1.245
Molecular Function	GO:0005253	8	anion channel activity	0.116075	P21796	61	1.877	Up	2.673e-06	K	Voltage-dependent anion-selective channel protein 1 OS=Homo sapiens OX=9606 GN=VDAC1 PE=1 SV=2	VDAC1	1	0.00011548	117.25	VTGSLETK(1)YR	3	1.0352	3	0.663	0.636	0.677	1.244	1.244	1.221
Molecular Function	GO:0005253	8	anion channel activity	0.116075	P21796	20	1.506	Up	6.0692e-05	K	Voltage-dependent anion-selective channel protein 1 OS=Homo sapiens OX=9606 GN=VDAC1 PE=1 SV=2	VDAC1	1	5.63016e-11	131.66	DVFTK(1)GYGFGLIK	2	0.76596	2	0.765	0.794	0.754	1.198	1.157	1.128
Molecular Function	GO:0019843	6	rRNA binding	0.00336274	P13639	32	1.652	Up	0.0028208	K	Elongation factor 2 OS=Homo sapiens OX=9606 GN=EEF2 PE=1 SV=4	EEF2	1	0.000910029	50.858	NMSVIAHVDHGK(1)STLTDSLVCK	4	-0.77941	1	0.655	0.728	0.777	1.058	1.229	1.282
Molecular Function	GO:0019843	6	rRNA binding	0.00336274	Q9Y2R5	78	1.614	Up	0.0103974	K	28S ribosomal protein S17, mitochondrial OS=Homo sapiens OX=9606 GN=MRPS17 PE=1 SV=1	MRPS17	1	0.0111073	46.88	HVK(1)HELAEIVFK	4	-0.81694	1	0.698	0.883	0.619	1.135	1.24	1.176
Molecular Function	GO:0019843	6	rRNA binding	0.00336274	P62263	106	4.268	Up	8.5519e-07	K	40S ribosomal protein S14 OS=Homo sapiens OX=9606 GN=RPS14 PE=1 SV=3	RPS14	1	0.000851749	84.173	TK(1)TPGPGAQSALR	2	-2.5539	1	0.322	0.351	0.346	1.465	1.393	1.491
Molecular Function	GO:0019843	6	rRNA binding	0.00336274	P62263	96	1.537	Up	0.0272	K	40S ribosomal protein S14 OS=Homo sapiens OX=9606 GN=RPS14 PE=1 SV=3	RPS14	1	7.38528e-07	110.08	ELGITALHIK(1)LR	3	0.52572	2	0.692	0.795	0.788	0.974	1.432	1.09
Molecular Function	GO:0019843	6	rRNA binding	0.00336274	P62917	46	1.894	Up	1.75293e-05	K	60S ribosomal protein L8 OS=Homo sapiens OX=9606 GN=RPL8 PE=1 SV=2	RPL8	1	0.000128202	96.464	GIVK(1)DIIHDPGR	2	-0.25301	2	0.668	0.643	0.653	1.287	1.189	1.244
Molecular Function	GO:0019843	6	rRNA binding	0.00336274	P39023	66	1.637	Up	1.8678e-05	K	60S ribosomal protein L3 OS=Homo sapiens OX=9606 GN=RPL3 PE=1 SV=2	RPL3	1	0.0020035	71.153	EVDRPGSK(1)VNK	3	-0.11062	1	0.705	0.753	0.721	1.174	1.195	1.199
Molecular Function	GO:0019843	6	rRNA binding	0.00336274	P39023	115	1.601	Up	0.00150122	K	60S ribosomal protein L3 OS=Homo sapiens OX=9606 GN=RPL3 PE=1 SV=2	RPL3	1	0.000290809	84.734	TVFAEHISDECK(1)R	3	-0.2477	1	0.682	0.738	0.796	1.244	1.216	1.088
Molecular Function	GO:0019843	6	rRNA binding	0.00336274	Q92979	59	1.731	Up	0.00143751	K	Ribosomal RNA small subunit methyltransferase NEP1 OS=Homo sapiens OX=9606 GN=EMG1 PE=1 SV=4	EMG1	1	0.00264408	75.589	VGK(1)TYELLNCDK	2	0.57293	1	0.709	0.614	0.773	1.241	1.158	1.229
Molecular Function	GO:0019843	6	rRNA binding	0.00336274	P46777	27	1.597	Up	0.00119775	K	60S ribosomal protein L5 OS=Homo sapiens OX=9606 GN=RPL5 PE=1 SV=3	RPL5	1	0.0161426	70.412	EGK(1)TDYYAR	2	-0.47447	2	0.68	0.764	0.777	1.268	1.167	1.111
Molecular Function	GO:0019843	6	rRNA binding	0.00336274	P62277	34	1.54	Up	5.7354e-05	K	40S ribosomal protein S13 OS=Homo sapiens OX=9606 GN=RPS13 PE=1 SV=2	RPS13	1	4.38739e-08	131.35	LTSDDVK(1)EQIYK	2	0.23715	1	0.761	0.744	0.773	1.215	1.163	1.13
Molecular Function	GO:0019843	6	rRNA binding	0.00336274	P62269	137	1.73	Up	2.4191e-06	K	40S ribosomal protein S18 OS=Homo sapiens OX=9606 GN=RPS18 PE=1 SV=3	RPS18	1	0.00404982	83.438	GQHTK(1)TTGR	2	0.13381	2	0.682	0.709	0.705	1.22	1.182	1.224
Molecular Function	GO:0043022	5	ribosome binding	0.240156	P13639	32	1.652	Up	0.0028208	K	Elongation factor 2 OS=Homo sapiens OX=9606 GN=EEF2 PE=1 SV=4	EEF2	1	0.000910029	50.858	NMSVIAHVDHGK(1)STLTDSLVCK	4	-0.77941	1	0.655	0.728	0.777	1.058	1.229	1.282
Molecular Function	GO:0043022	5	ribosome binding	0.240156	P04844	442	1.522	Up	0.0020441	K	Dolichyl-diphosphooligosaccharide--protein glycosyltransferase subunit 2 OS=Homo sapiens OX=9606 GN=RPN2 PE=1 SV=3	RPN2	1	9.65183e-11	115.57	LHNQK(1)TGQEVVFVAEPDNK	3	-0.45133	1	0.74	0.848	0.707	1.198	1.112	1.182
Molecular Function	GO:0043022	5	ribosome binding	0.240156	P04844	311	1.701	Up	0.00068179	K	Dolichyl-diphosphooligosaccharide--protein glycosyltransferase subunit 2 OS=Homo sapiens OX=9606 GN=RPN2 PE=1 SV=3	RPN2	1	3.52812e-05	124.06	LEHAK(1)SVASR	2	-0.83563	2	0.647	0.769	0.706	1.219	1.246	1.144
Molecular Function	GO:0043022	5	ribosome binding	0.240156	P11021	553	1.584	Up	0.00051646	K	Endoplasmic reticulum chaperone BiP OS=Homo sapiens OX=9606 GN=HSPA5 PE=1 SV=2	HSPA5	1	0.0198462	68.915	FAEEDK(1)K	3	0.25072	1	0.739	0.758	0.737	1.273	1.094	1.171
Molecular Function	GO:0043022	5	ribosome binding	0.240156	P11021	352	1.593	Up	7.6558e-05	K	Endoplasmic reticulum chaperone BiP OS=Homo sapiens OX=9606 GN=HSPA5 PE=1 SV=2	HSPA5	1	0.000769989	104.22	VLEDSDLK(1)K	3	2.7364	2	0.731	0.73	0.76	1.123	1.214	1.2
Molecular Function	GO:0016864	5	intramolecular oxidoreductase activity, transposing S-S bonds	0.207279	Q15084	368	1.539	Up	1.70414e-05	K	Protein disulfide-isomerase A6 OS=Homo sapiens OX=9606 GN=PDIA6 PE=1 SV=1	PDIA6	1	0.0107878	97.798	MK(1)FALLK	2	-0.72228	1	0.752	0.78	0.746	1.188	1.148	1.169
Molecular Function	GO:0016864	5	intramolecular oxidoreductase activity, transposing S-S bonds	0.207279	P30101	494	1.633	Up	0.00061616	K	Protein disulfide-isomerase A3 OS=Homo sapiens OX=9606 GN=PDIA3 PE=1 SV=4	PDIA3	1	1.11552e-22	158.91	EATNPPVIQEEK(1)PK	2	-0.21724	3	0.713	0.703	0.767	1.119	1.287	1.158
Molecular Function	GO:0003857	6	3-hydroxyacyl-CoA dehydrogenase activity	0.207279	Q16836	301	1.579	Up	0.00090275	K	Hydroxyacyl-coenzyme A dehydrogenase, mitochondrial OS=Homo sapiens OX=9606 GN=HADH PE=1 SV=3	HADH	1	0.00585392	66.27	LVAENK(1)FGK	3	0.9182	1	0.745	0.808	0.684	1.199	1.132	1.202
Molecular Function	GO:0003857	6	3-hydroxyacyl-CoA dehydrogenase activity	0.207279	P51659	644	1.711	Up	3.2606e-06	K	Peroxisomal multifunctional enzyme type 2 OS=Homo sapiens OX=9606 GN=HSD17B4 PE=1 SV=3	HSD17B4	1	0.00199147	78.488	DIGPEVVK(1)K	3	-0.57914	2	0.692	0.726	0.695	1.207	1.187	1.221
Molecular Function	GO:0004576	6	oligosaccharyl transferase activity	0.0149761	P04843	187	2.143	Up	1.58621e-05	K	Dolichyl-diphosphooligosaccharide--protein glycosyltransferase subunit 1 OS=Homo sapiens OX=9606 GN=RPN1 PE=1 SV=1	RPN1	1	1.75673e-17	156.17	NVESYTK(1)LGNPTR	2	-0.077266	1	0.57	0.614	0.604	1.244	1.32	1.267
Molecular Function	GO:0004576	6	oligosaccharyl transferase activity	0.0149761	P46977	440	1.518	Up	0.00032166	K	Dolichyl-diphosphooligosaccharide--protein glycosyltransferase subunit STT3A OS=Homo sapiens OX=9606 GN=STT3A PE=1 SV=2	STT3A	1	0.00938561	58.274	NLDISRPDK(1)K	3	-0.18069	1	0.801	0.738	0.761	1.186	1.102	1.203
Molecular Function	GO:0004576	6	oligosaccharyl transferase activity	0.0149761	Q8TCJ2	688	1.573	Up	0.00030171	K	Dolichyl-diphosphooligosaccharide--protein glycosyltransferase subunit STT3B OS=Homo sapiens OX=9606 GN=STT3B PE=1 SV=1	STT3B	1	0.000563873	81.625	IAEGEHPK(1)DIR	3	1.1943	1	0.753	0.725	0.767	1.259	1.124	1.148
Molecular Function	GO:0004576	6	oligosaccharyl transferase activity	0.0149761	Q8TCJ2	784	1.902	Up	1.014e-06	K	Dolichyl-diphosphooligosaccharide--protein glycosyltransferase subunit STT3B OS=Homo sapiens OX=9606 GN=STT3B PE=1 SV=1	STT3B	1	0.00186854	91.853	ETLDHK(1)PR	2	2.0478	2	0.65	0.638	0.668	1.235	1.226	1.259
Molecular Function	GO:0008080	7	N-acetyltransferase activity	0.303363	Q09472	1769	4.035	Up	2.2499e-07	K	Histone acetyltransferase p300 OS=Homo sapiens OX=9606 GN=EP300 PE=1 SV=2	EP300	1	1.89332e-49	208.56	VVQHTK(1)GCK(1)R	2	0.47995	5	0.357	0.351	0.363	1.501	1.405	1.415
Molecular Function	GO:0008080	7	N-acetyltransferase activity	0.303363	Q09472	1772	11.928	Up	3.2215e-07	K	Histone acetyltransferase p300 OS=Homo sapiens OX=9606 GN=EP300 PE=1 SV=2	EP300	1	1.89332e-49	208.56	VVQHTK(1)GCK(1)R	2	0.47995	3	0.123	0.136	0.141	1.65	1.565	1.556
Molecular Function	GO:0008080	7	N-acetyltransferase activity	0.303363	Q09472	1762	7.585	Up	0.00119748	K	Histone acetyltransferase p300 OS=Homo sapiens OX=9606 GN=EP300 PE=1 SV=2	EP300	1	2.32223e-16	145.52	NANCSLPSCQK(1)MK(1)R	2	-1.3586	2	0.201	0.229	0.18	1.533	1.572	1.522
Molecular Function	GO:0008080	7	N-acetyltransferase activity	0.303363	Q09472	1774	3.958	Up	0.0092049	K	Histone acetyltransferase p300 OS=Homo sapiens OX=9606 GN=EP300 PE=1 SV=2	EP300	1	0.000167046	115.33	K(1)TNGGCPICK	3	-1.4801	4	0.287	0.344	0.456	1.437	1.433	1.432
Molecular Function	GO:0008080	7	N-acetyltransferase activity	0.303363	Q09472	1704	1.891	Up	5.0177e-07	K	Histone acetyltransferase p300 OS=Homo sapiens OX=9606 GN=EP300 PE=1 SV=2	EP300	1	2.47609e-10	80.688	NHDHK(1)MEK(1)LGLGLDDESNNQQAAATQSPGDSR	4	4.3749	6	0.642	0.664	0.659	1.234	1.257	1.224
Molecular Function	GO:0008080	7	N-acetyltransferase activity	0.303363	Q09472	1760	1.885	Up	3.5127e-06	K	Histone acetyltransferase p300 OS=Homo sapiens OX=9606 GN=EP300 PE=1 SV=2	EP300	1	2.32223e-16	145.52	NANCSLPSCQK(1)MK(1)R	2	-1.3586	5	0.642	0.648	0.679	1.223	1.266	1.222
Molecular Function	GO:0008080	7	N-acetyltransferase activity	0.303363	Q92793	1811	7.596	Up	0.00094031	K	CREB-binding protein OS=Homo sapiens OX=9606 GN=CREBBP PE=1 SV=3	CREBBP	1	0.00377762	83.182	K(1)TNGGCPVCK	2	0.18561	1	0.185	0.196	0.228	1.546	1.535	1.545
Molecular Function	GO:0004871	2	signal transducer activity	0.0347269	P21333	994	1.525	Up	1.9772e-05	K	Filamin-A OS=Homo sapiens OX=9606 GN=FLNA PE=1 SV=4	FLNA	1	0.00346172	85.813	DQEFTVK(1)SK	3	-0.051795	2	0.786	0.743	0.763	1.155	1.183	1.157
Molecular Function	GO:0004871	2	signal transducer activity	0.0347269	P15692	149	1.52	Up	0.0183197	K	Vascular endothelial growth factor A OS=Homo sapiens OX=9606 GN=VEGFA PE=1 SV=2	VEGFA	1	0.0158118	68.016	GK(1)GK(1)GQK(1)R	3	0.20842	1	0.619	0.836	0.835	1.054	1.197	1.23
Molecular Function	GO:0004871	2	signal transducer activity	0.0347269	P15692	147	1.52	Up	0.0183197	K	Vascular endothelial growth factor A OS=Homo sapiens OX=9606 GN=VEGFA PE=1 SV=2	VEGFA	1	0.0158118	68.016	GK(1)GK(1)GQK(1)R	3	0.20842	1	0.619	0.836	0.835	1.054	1.197	1.23
Molecular Function	GO:0004871	2	signal transducer activity	0.0347269	P15692	152	1.52	Up	0.0183197	K	Vascular endothelial growth factor A OS=Homo sapiens OX=9606 GN=VEGFA PE=1 SV=2	VEGFA	1	0.0158118	68.016	GK(1)GK(1)GQK(1)R	3	0.20842	1	0.619	0.836	0.835	1.054	1.197	1.23
Molecular Function	GO:0004871	2	signal transducer activity	0.0347269	P36507	108	1.663	Up	0.0022007	K	Dual specificity mitogen-activated protein kinase kinase 2 OS=Homo sapiens OX=9606 GN=MAP2K2 PE=1 SV=1	MAP2K2	1	4.9811e-05	95.483	LIHLEIK(1)PAIR	3	-0.84799	1	0.79	0.663	0.705	1.236	1.078	1.275
Molecular Function	GO:0004871	2	signal transducer activity	0.0347269	P13726	233	2.168	Up	0.00033987	K	Tissue factor OS=Homo sapiens OX=9606 GN=F3 PE=1 SV=1	F3	1	2.77667e-05	95.57	K(1)STDSPVECMGQEK	3	2.065	1	0.588	0.527	0.659	1.34	1.252	1.254
Molecular Function	GO:0004871	2	signal transducer activity	0.0347269	O75197	526	6.771	Up	0.0093419	K	Low-density lipoprotein receptor-related protein 5 OS=Homo sapiens OX=9606 GN=LRP5 PE=1 SV=2	LRP5	1	0.0142367	76.073	TDK(1)IEVINVDGTK	2	2.3659	1	0.196	0.27	0.207	1.517	0.67	2.37
Molecular Function	GO:0004871	2	signal transducer activity	0.0347269	O75487	44	1.652	Up	4.6607e-06	K	Glypican-4 OS=Homo sapiens OX=9606 GN=GPC4 PE=1 SV=4	GPC4	1	1.65724e-10	118.72	GFNK(1)NDAPLHEINGDHLK	4	0.22408	2	0.727	0.708	0.733	1.228	1.179	1.174
Molecular Function	GO:0004871	2	signal transducer activity	0.0347269	P22794	170	2.522	Up	4.4941e-05	K	Protein EVI2A OS=Homo sapiens OX=9606 GN=EVI2A PE=2 SV=2	EVI2A	1	0.0125926	48.284	SK(1)QVGK(1)RQPR	3	3.0827	2	0.525	0.495	0.558	1.346	1.397	1.237
Molecular Function	GO:0004871	2	signal transducer activity	0.0347269	P22794	174	2.522	Up	4.4941e-05	K	Protein EVI2A OS=Homo sapiens OX=9606 GN=EVI2A PE=2 SV=2	EVI2A	1	0.0125926	48.284	SK(1)QVGK(1)RQPR	3	3.0827	2	0.525	0.495	0.558	1.346	1.397	1.237
Molecular Function	GO:0004871	2	signal transducer activity	0.0347269	Q13009	564	2.554	Up	2.264e-05	K	T-lymphoma invasion and metastasis-inducing protein 1 OS=Homo sapiens OX=9606 GN=TIAM1 PE=1 SV=2	TIAM1	1	0.00536023	86.794	LLK(1)SEIK	3	-0.69534	1	0.501	0.52	0.54	1.387	1.234	1.366
Molecular Function	GO:0004871	2	signal transducer activity	0.0347269	Q92793	1811	7.596	Up	0.00094031	K	CREB-binding protein OS=Homo sapiens OX=9606 GN=CREBBP PE=1 SV=3	CREBBP	1	0.00377762	83.182	K(1)TNGGCPVCK	2	0.18561	1	0.185	0.196	0.228	1.546	1.535	1.545
Molecular Function	GO:0004871	2	signal transducer activity	0.0347269	Q8NGZ5	301	1.976	Up	3.3313e-06	K	Olfactory receptor 2G2 OS=Homo sapiens OX=9606 GN=OR2G2 PE=3 SV=1	OR2G2	1	0.0393046	75.738	EVK(1)GALK	2	-0.3398	1	0.658	0.629	0.616	1.28	1.24	1.24
Molecular Function	GO:0004871	2	signal transducer activity	0.0347269	P17301	261	4.97	Up	7.7205e-05	K	Integrin alpha-2 OS=Homo sapiens OX=9606 GN=ITGA2 PE=1 SV=1	ITGA2	1	5.75495e-08	138.89	K(1)YAYSAASGGR	2	-0.52946	1	0.253	0.307	0.334	1.631	1.406	1.406
Molecular Function	GO:0000978	10	RNA polymerase II core promoter proximal region sequence-specific DNA binding	0.0872544	P07910	176	1.934	Up	2.1133e-05	K	Heterogeneous nuclear ribonucleoproteins C1/C2 OS=Homo sapiens OX=9606 GN=HNRNPC PE=1 SV=4	HNRNPC	1	4.37087e-06	137.4	SGFNSK(1)SGQR	2	0.17987	2	0.61	0.654	0.667	1.26	1.219	1.256
Molecular Function	GO:0000978	10	RNA polymerase II core promoter proximal region sequence-specific DNA binding	0.0872544	Q8NI51	335	1.578	Up	0.00022197	K	Transcriptional repressor CTCFL OS=Homo sapiens OX=9606 GN=CTCFL PE=1 SV=2	CTCFL	0.999974	0.0106656	55.314	YK(1)HTHEKPFK	4	1.7238	1	0.752	0.764	0.724	1.237	1.189	1.108
Molecular Function	GO:0000978	10	RNA polymerase II core promoter proximal region sequence-specific DNA binding	0.0872544	Q9UQR1	211	2.294	Up	2.0082e-05	K	Zinc finger protein 148 OS=Homo sapiens OX=9606 GN=ZNF148 PE=1 SV=2	ZNF148	1	0.0270936	63.816	FIQK(1)YLLQR	2	2.8693	1	0.547	0.593	0.555	1.247	1.282	1.36
Molecular Function	GO:0000978	10	RNA polymerase II core promoter proximal region sequence-specific DNA binding	0.0872544	P0C0S5	8	2.197	Up	4.9094e-07	K	Histone H2A.Z OS=Homo sapiens OX=9606 GN=H2AZ1 PE=1 SV=2	H2AZ1	1	2.41356e-07	111.64	AGK(1)DSGK(1)AK(1)TK	2	0.79948	12	0.591	0.582	0.583	1.323	1.257	1.278
Molecular Function	GO:0000978	10	RNA polymerase II core promoter proximal region sequence-specific DNA binding	0.0872544	P0C0S5	12	2.225	Up	3.9617e-07	K	Histone H2A.Z OS=Homo sapiens OX=9606 GN=H2AZ1 PE=1 SV=2	H2AZ1	1	2.41356e-07	111.64	AGK(1)DSGK(1)AK(1)TK	2	0.79948	10	0.585	0.579	0.575	1.326	1.264	1.279
Molecular Function	GO:0000978	10	RNA polymerase II core promoter proximal region sequence-specific DNA binding	0.0872544	P0C0S5	5	1.669	Up	5.8561e-05	K	Histone H2A.Z OS=Homo sapiens OX=9606 GN=H2AZ1 PE=1 SV=2	H2AZ1	1	2.41356e-07	111.64	AGGK(1)AGK(1)DSGK(1)AK(1)TK	2	0.11281	10	0.749	0.714	0.689	1.227	1.164	1.201
Molecular Function	GO:0000978	10	RNA polymerase II core promoter proximal region sequence-specific DNA binding	0.0872544	P0C0S5	14	2.729	Up	2.1717e-06	K	Histone H2A.Z OS=Homo sapiens OX=9606 GN=H2AZ1 PE=1 SV=2	H2AZ1	1	2.41356e-07	106.57	AGK(1)DSGK(1)AK(1)TK	2	0.79948	4	0.511	0.491	0.48	1.402	1.295	1.348
Molecular Function	GO:0000978	10	RNA polymerase II core promoter proximal region sequence-specific DNA binding	0.0872544	O94916	259	7.661	Up	1.5626e-06	K	Nuclear factor of activated T-cells 5 OS=Homo sapiens OX=9606 GN=NFAT5 PE=1 SV=1	NFAT5	1	0.038802	41.695	AGNGTLENQK(1)GTGVK(1)K	3	2.9694	1	0.192	0.214	0.198	1.463	1.681	1.483
Molecular Function	GO:0000978	10	RNA polymerase II core promoter proximal region sequence-specific DNA binding	0.0872544	O94916	264	7.661	Up	1.5626e-06	K	Nuclear factor of activated T-cells 5 OS=Homo sapiens OX=9606 GN=NFAT5 PE=1 SV=1	NFAT5	1	0.038802	41.695	AGNGTLENQK(1)GTGVK(1)K	3	2.9694	1	0.192	0.214	0.198	1.463	1.681	1.483
Molecular Function	GO:0070491	5	repressing transcription factor binding	0.303363	P45973	91	1.882	Up	0.000176434	K	Chromobox protein homolog 5 OS=Homo sapiens OX=9606 GN=CBX5 PE=1 SV=1	CBX5	1	6.4636e-18	162.37	K(1)SNFSNSADDIK	2	-0.43997	1	0.616	0.7	0.656	1.302	1.23	1.179
Molecular Function	GO:0070491	5	repressing transcription factor binding	0.303363	P09429	90	1.761	Up	0.000121985	K	High mobility group protein B1 OS=Homo sapiens OX=9606 GN=HMGB1 PE=1 SV=3	HMGB1	1	0.014499	80.688	FK(1)DPNAPK	2	-0.291	2	0.677	0.691	0.704	1.289	1.223	1.136
Molecular Function	GO:0000400	7	four-way junction DNA binding	0.0149761	P26583	3	2.956	Up	1.481e-06	K	High mobility group protein B2 OS=Homo sapiens OX=9606 GN=HMGB2 PE=1 SV=2	HMGB2	0.999989	0.00434355	72.928	GK(1)GDPNKPR	3	-2.3564	2	0.457	0.487	0.444	1.378	1.343	1.382
Molecular Function	GO:0000400	7	four-way junction DNA binding	0.0149761	P09429	90	1.761	Up	0.000121985	K	High mobility group protein B1 OS=Homo sapiens OX=9606 GN=HMGB1 PE=1 SV=3	HMGB1	1	0.014499	80.688	FK(1)DPNAPK	2	-0.291	2	0.677	0.691	0.704	1.289	1.223	1.136
Molecular Function	GO:0000400	7	four-way junction DNA binding	0.0149761	O15347	161	1.908	Up	1.7514e-05	K	High mobility group protein B3 OS=Homo sapiens OX=9606 GN=HMGB3 PE=1 SV=4	HMGB3	1	0.0120205	83.862	DVADYK(1)SK	2	-0.43322	1	0.626	0.65	0.676	1.259	1.256	1.209
Molecular Function	GO:0043565	6	sequence-specific DNA binding	0.010382	P07910	176	1.934	Up	2.1133e-05	K	Heterogeneous nuclear ribonucleoproteins C1/C2 OS=Homo sapiens OX=9606 GN=HNRNPC PE=1 SV=4	HNRNPC	1	4.37087e-06	137.4	SGFNSK(1)SGQR	2	0.17987	2	0.61	0.654	0.667	1.26	1.219	1.256
Molecular Function	GO:0043565	6	sequence-specific DNA binding	0.010382	P36776	367	1.766	Up	1.2118e-06	K	Lon protease homolog, mitochondrial OS=Homo sapiens OX=9606 GN=LONP1 PE=1 SV=2	LONP1	1	0.0134532	94.114	ALSLLK(1)K	2	0.1015	1	0.679	0.702	0.684	1.21	1.197	1.239
Molecular Function	GO:0043565	6	sequence-specific DNA binding	0.010382	P09651	105	1.515	Up	0.0038216	K	Heterogeneous nuclear ribonucleoprotein A1 OS=Homo sapiens OX=9606 GN=HNRNPA1 PE=1 SV=5	HNRNPA1	1	0.000353752	77.776	EDSQRPGAHLTVK(1)K	3	-0.32852	2	0.768	0.733	0.803	1.186	1.276	1.029
Molecular Function	GO:0043565	6	sequence-specific DNA binding	0.010382	Q15631	56	1.728	Up	0.00117994	K	Translin OS=Homo sapiens OX=9606 GN=TSN PE=1 SV=1	TSN	1	2.53093e-08	93.804	EILTLLQGVHQGAGFQDIPK(1)R	3	-0.52906	1	0.696	0.66	0.746	1.349	1.135	1.148
Molecular Function	GO:0043565	6	sequence-specific DNA binding	0.010382	Q8NI51	335	1.578	Up	0.00022197	K	Transcriptional repressor CTCFL OS=Homo sapiens OX=9606 GN=CTCFL PE=1 SV=2	CTCFL	0.999974	0.0106656	55.314	YK(1)HTHEKPFK	4	1.7238	1	0.752	0.764	0.724	1.237	1.189	1.108
Molecular Function	GO:0043565	6	sequence-specific DNA binding	0.010382	O43707	779	1.506	Up	4.621e-06	K	Alpha-actinin-4 OS=Homo sapiens OX=9606 GN=ACTN4 PE=1 SV=2	ACTN4	1	2.1119e-07	92.098	ASFNHFDK(1)DHGGALGPEEFK	4	-0.48137	1	0.769	0.755	0.788	1.156	1.148	1.177
Molecular Function	GO:0043565	6	sequence-specific DNA binding	0.010382	O94916	259	7.661	Up	1.5626e-06	K	Nuclear factor of activated T-cells 5 OS=Homo sapiens OX=9606 GN=NFAT5 PE=1 SV=1	NFAT5	1	0.038802	41.695	AGNGTLENQK(1)GTGVK(1)K	3	2.9694	1	0.192	0.214	0.198	1.463	1.681	1.483
Molecular Function	GO:0043565	6	sequence-specific DNA binding	0.010382	O94916	264	7.661	Up	1.5626e-06	K	Nuclear factor of activated T-cells 5 OS=Homo sapiens OX=9606 GN=NFAT5 PE=1 SV=1	NFAT5	1	0.038802	41.695	AGNGTLENQK(1)GTGVK(1)K	3	2.9694	1	0.192	0.214	0.198	1.463	1.681	1.483
Molecular Function	GO:0043565	6	sequence-specific DNA binding	0.010382	Q96T88	546	1.987	Up	0.0040585	K	E3 ubiquitin-protein ligase UHRF1 OS=Homo sapiens OX=9606 GN=UHRF1 PE=1 SV=1	UHRF1	1	0.000183326	96.059	NSK(1)YAPAEGNR	2	0.1761	1	0.675	0.581	0.638	1.244	1.265	1.255
Molecular Function	GO:0043565	6	sequence-specific DNA binding	0.010382	Q09472	1769	4.035	Up	2.2499e-07	K	Histone acetyltransferase p300 OS=Homo sapiens OX=9606 GN=EP300 PE=1 SV=2	EP300	1	1.89332e-49	208.56	VVQHTK(1)GCK(1)R	2	0.47995	5	0.357	0.351	0.363	1.501	1.405	1.415
Molecular Function	GO:0043565	6	sequence-specific DNA binding	0.010382	Q09472	1772	11.928	Up	3.2215e-07	K	Histone acetyltransferase p300 OS=Homo sapiens OX=9606 GN=EP300 PE=1 SV=2	EP300	1	1.89332e-49	208.56	VVQHTK(1)GCK(1)R	2	0.47995	3	0.123	0.136	0.141	1.65	1.565	1.556
Molecular Function	GO:0043565	6	sequence-specific DNA binding	0.010382	Q09472	1762	7.585	Up	0.00119748	K	Histone acetyltransferase p300 OS=Homo sapiens OX=9606 GN=EP300 PE=1 SV=2	EP300	1	2.32223e-16	145.52	NANCSLPSCQK(1)MK(1)R	2	-1.3586	2	0.201	0.229	0.18	1.533	1.572	1.522
Molecular Function	GO:0043565	6	sequence-specific DNA binding	0.010382	Q09472	1774	3.958	Up	0.0092049	K	Histone acetyltransferase p300 OS=Homo sapiens OX=9606 GN=EP300 PE=1 SV=2	EP300	1	0.000167046	115.33	K(1)TNGGCPICK	3	-1.4801	4	0.287	0.344	0.456	1.437	1.433	1.432
Molecular Function	GO:0043565	6	sequence-specific DNA binding	0.010382	Q09472	1704	1.891	Up	5.0177e-07	K	Histone acetyltransferase p300 OS=Homo sapiens OX=9606 GN=EP300 PE=1 SV=2	EP300	1	2.47609e-10	80.688	NHDHK(1)MEK(1)LGLGLDDESNNQQAAATQSPGDSR	4	4.3749	6	0.642	0.664	0.659	1.234	1.257	1.224
Molecular Function	GO:0043565	6	sequence-specific DNA binding	0.010382	Q09472	1760	1.885	Up	3.5127e-06	K	Histone acetyltransferase p300 OS=Homo sapiens OX=9606 GN=EP300 PE=1 SV=2	EP300	1	2.32223e-16	145.52	NANCSLPSCQK(1)MK(1)R	2	-1.3586	5	0.642	0.648	0.679	1.223	1.266	1.222
Molecular Function	GO:0043565	6	sequence-specific DNA binding	0.010382	Q15365	31	1.653	Up	0.0098571	K	Poly(rC)-binding protein 1 OS=Homo sapiens OX=9606 GN=PCBP1 PE=1 SV=2	PCBP1	1	0.00209659	91.658	EVGSIIGK(1)K	2	0.74548	2	0.745	0.741	0.679	1.055	1.447	1.076
Molecular Function	GO:0043565	6	sequence-specific DNA binding	0.010382	O60869	43	1.525	Up	0.0052223	K	Endothelial differentiation-related factor 1 OS=Homo sapiens OX=9606 GN=EDF1 PE=1 SV=1	EDF1	1	0.0158941	80.219	K(1)WAAGQNK	2	-2.0176	1	0.763	0.767	0.761	1.153	1.109	1.231
Molecular Function	GO:0043565	6	sequence-specific DNA binding	0.010382	Q9UQR1	211	2.294	Up	2.0082e-05	K	Zinc finger protein 148 OS=Homo sapiens OX=9606 GN=ZNF148 PE=1 SV=2	ZNF148	1	0.0270936	63.816	FIQK(1)YLLQR	2	2.8693	1	0.547	0.593	0.555	1.247	1.282	1.36
[truncated: 6,623 more rows]

## Sheet: Down
GO Terms Level 1	GO Terms Description	GO Terms Level	GO Terms ID	Mapping	Background	All Mapping	All Background	Fold Enrichment	Fisher' exact test P value	-log10(p value)	Related Protein
[truncated: 30 more rows]

## Sheet: Down GO2Protein
GO Terms Level 1	GO Terms ID	GO Terms Level	GO Terms Description	Fisher's exact test P value	Protein accession	Position	Ratio	Regulated Type	P value	Amino acid	Protein description	Gene name	Localization probability	PEP	Score	Modified sequence	Charge	Mass error [ppm]	MS/MS Count	MKN_45C1	MKN_45C2	MKN_45C3	MKN_45S1	MKN_45S2	MKN_45S3
[truncated: 8,089 more rows]

[truncated: 2 more sheets: all, all GO2Protein]
