# Supplementary material for: Differential expression of lysine acetylation proteins in gastric cancer treated with a new antitumor agent bioactive peptide chelate selenium
Source: PeerJ. 2023 Jan 17;11:e14384. doi: 10.7717/peerj.14384 (PMC9854375; doi:10.7717/peerj.14384)
Supplement: Table S3 [file peerj-11-14384-s003.xlsx]

## Sheet: Up
KEGG pathway	Mapping	Background	All Mapping	All Background	Fold enrichment	Fisher's exact test p value	-log10(p value)	Related proteins
hsa04512 ECM-receptor interaction	6	11	142	1158	4.45	0.000840279	3.08	P18564 P23229 P24043 P02458 Q16787 P17301
hsa04610 Complement and coagulation cascades	4	5	142	1158	6.52	0.000984843	3.01	P00740 P13726 P13987 P08174
hsa04510 Focal adhesion	12	38	142	1158	2.58	0.0011585	2.94	P15692 P21333 P18564 P23229 Q03135 O43707 P63261 Q14185 P24043 P02458 Q16787 P17301
hsa05412 Arrhythmogenic right ventricular cardiomyopathy (ARVC)	6	12	142	1158	4.08	0.00151196	2.82	P18564 P23229 P63261 P24043 P35221 P17301
hsa00513 Various types of N-glycan biosynthesis	5	9	142	1158	4.53	0.00216613	2.66	P04843 P04844 P15291 P46977 Q8TCJ2
hsa04141 Protein processing in endoplasmic reticulum	14	52	142	1158	2.2	0.00255868	2.59	Q07065 P14625 P55072 P04843 Q15084 P04844 Q92598 Q8TCJ2 P27824 P30101 P25685 P11021 P46977 Q9Y4L1
hsa04151 PI3K-Akt signaling pathway	12	43	142	1158	2.28	0.00378084	2.42	P15692 P18564 P36507 P14625 P23229 P31946 Q15382 P62753 P24043 Q16787 P02458 P17301
hsa00510 N-Glycan biosynthesis	5	10	142	1158	4.08	0.00390764	2.41	P04843 P04844 P15291 P46977 Q8TCJ2
hsa05205 Proteoglycans in cancer	11	39	142	1158	2.3	0.00507379	2.29	P15692 P21333 P36507 Q13557 Q03135 P17844 P62753 Q13009 P63261 Q14247 P17301
hsa04640 Hematopoietic cell lineage	4	7	142	1158	4.66	0.00564465	2.25	P23229 P13987 P17301 P08174
hsa04810 Regulation of actin cytoskeleton	12	45	142	1158	2.17	0.00568736	2.25	P18564 P36507 P23528 P23229 Q7L576 O43707 Q13009 P63261 Q14185 Q8TBX8 P59998 P17301
hsa05165 Human papillomavirus infection	12	47	142	1158	2.08	0.00829147	2.08	P15692 Q09472 P18564 P36507 P23229 Q15382 Q05086 P24043 P02458 Q92793 Q16787 P17301
hsa05410 Hypertrophic cardiomyopathy (HCM)	5	12	142	1158	3.4	0.0100008	2	P18564 P23229 P63261 P24043 P17301
hsa05416 Viral myocarditis	4	8	142	1158	4.08	0.0102216	1.99	P63261 P24043 Q03135 P08174
hsa05414 Dilated cardiomyopathy (DCM)	5	13	142	1158	3.14	0.014672	1.83	P18564 P23229 P63261 P24043 P17301
hsa04066 HIF-1 signaling pathway	8	28	142	1158	2.33	0.0152458	1.82	P15692 Q09472 P00338 P04075 P36507 Q13557 P62753 Q92793
hsa05222 Small cell lung cancer	4	10	142	1158	3.26	0.0251717	1.6	P23229 P24043 Q16787 P17301
hsa05020 Prion diseases	3	6	142	1158	4.08	0.0273019	1.56	P31948 P36507 P11021
hsa05322 Systemic lupus erythematosus	7	26	142	1158	2.2	0.0315099	1.5	Q99525 Q96KK5 P62805 Q71DI3 P0C0S5 Q71UI9 O43707
hsa03010 Ribosome	17	88	142	1158	1.58	0.0319392	1.5	P18124 P09001 P61254 P15880 P62263 P62917 P62753 Q02878 P46777 Q9Y2R5 P61313 P46778 P39023 P62249 P62277 Q9BYC8 P62269
hsa05200 Pathways in cancer	12	59	142	1158	1.66	0.0476992	1.32	P15692 Q09472 P36507 P14625 P23229 Q13557 O75197 P24043 P35221 Q92793 Q16787 P17301
hsa04916 Melanogenesis	4	12	142	1158	2.72	0.0487925	1.31	Q09472 P36507 Q13557 Q92793
hsa04918 Thyroid hormone synthesis	4	12	142	1158	2.72	0.0487925	1.31	P02766 P14625 P27824 P11021

## Sheet: Up Pathway2Protein
KEGG pathway	Fisher's exact test p value	Mapping	Fold enrichment	Protein accession	Position	Ratio	Regulated Type	P value	Amino acid	Protein description	Gene name	Localization probability	PEP	Score	Modified sequence	Charge	Mass error [ppm]	MS/MS Count	MKN_45C1	MKN_45C2	MKN_45C3	MKN_45S1	MKN_45S2	MKN_45S3
hsa04014 Ras signaling pathway	0.452328	3	1.22	P15692	149	1.52	Up	0.0183197	K	Vascular endothelial growth factor A OS=Homo sapiens OX=9606 GN=VEGFA PE=1 SV=2	VEGFA	1	0.0158118	68.016	GK(1)GK(1)GQK(1)R	3	0.20842	1	0.619	0.836	0.835	1.054	1.197	1.23
hsa04014 Ras signaling pathway	0.452328	3	1.22	P15692	147	1.52	Up	0.0183197	K	Vascular endothelial growth factor A OS=Homo sapiens OX=9606 GN=VEGFA PE=1 SV=2	VEGFA	1	0.0158118	68.016	GK(1)GK(1)GQK(1)R	3	0.20842	1	0.619	0.836	0.835	1.054	1.197	1.23
hsa04014 Ras signaling pathway	0.452328	3	1.22	P15692	152	1.52	Up	0.0183197	K	Vascular endothelial growth factor A OS=Homo sapiens OX=9606 GN=VEGFA PE=1 SV=2	VEGFA	1	0.0158118	68.016	GK(1)GK(1)GQK(1)R	3	0.20842	1	0.619	0.836	0.835	1.054	1.197	1.23
hsa04014 Ras signaling pathway	0.452328	3	1.22	P36507	108	1.663	Up	0.0022007	K	Dual specificity mitogen-activated protein kinase kinase 2 OS=Homo sapiens OX=9606 GN=MAP2K2 PE=1 SV=1	MAP2K2	1	4.9811e-05	95.483	LIHLEIK(1)PAIR	3	-0.84799	1	0.79	0.663	0.705	1.236	1.078	1.275
hsa04014 Ras signaling pathway	0.452328	3	1.22	Q13009	564	2.554	Up	2.264e-05	K	T-lymphoma invasion and metastasis-inducing protein 1 OS=Homo sapiens OX=9606 GN=TIAM1 PE=1 SV=2	TIAM1	1	0.00536023	86.794	LLK(1)SEIK	3	-0.69534	1	0.501	0.52	0.54	1.387	1.234	1.366
hsa05224 Breast cancer	0.256052	2	2.04	P36507	108	1.663	Up	0.0022007	K	Dual specificity mitogen-activated protein kinase kinase 2 OS=Homo sapiens OX=9606 GN=MAP2K2 PE=1 SV=1	MAP2K2	1	4.9811e-05	95.483	LIHLEIK(1)PAIR	3	-0.84799	1	0.79	0.663	0.705	1.236	1.078	1.275
hsa05224 Breast cancer	0.256052	2	2.04	O75197	526	6.771	Up	0.0093419	K	Low-density lipoprotein receptor-related protein 5 OS=Homo sapiens OX=9606 GN=LRP5 PE=1 SV=2	LRP5	1	0.0142367	76.073	TDK(1)IEVINVDGTK	2	2.3659	1	0.196	0.27	0.207	1.517	0.67	2.37
hsa03008 Ribosome biogenesis in eukaryotes	0.958143	1	0.34	Q92979	59	1.731	Up	0.00143751	K	Ribosomal RNA small subunit methyltransferase NEP1 OS=Homo sapiens OX=9606 GN=EMG1 PE=1 SV=4	EMG1	1	0.00264408	75.589	VGK(1)TYELLNCDK	2	0.57293	1	0.709	0.614	0.773	1.241	1.158	1.229
hsa04360 Axon guidance	0.725262	2	0.82	P23528	92	1.643	Up	3.7006e-05	K	Cofilin-1 OS=Homo sapiens OX=9606 GN=CFL1 PE=1 SV=3	CFL1	1	1.70741e-10	121.99	YALYDATYETK(1)ESK	2	0.88008	2	0.714	0.743	0.716	1.144	1.227	1.2
hsa04360 Axon guidance	0.725262	2	0.82	Q13557	268	2.448	Up	0.00064196	K	Calcium/calmodulin-dependent protein kinase type II subunit delta OS=Homo sapiens OX=9606 GN=CAMK2D PE=1 SV=3	CAMK2D	1	9.73432e-06	94.09	ITASEALK(1)HPWICQR	3	-2.1026	1	0.448	0.594	0.572	1.394	1.259	1.298
hsa05014 Amyotrophic lateral sclerosis (ALS)	0.650049	1	1.02	P07196	128	1.516	Up	0.0130616	K	Neurofilament light polypeptide OS=Homo sapiens OX=9606 GN=NEFL PE=1 SV=3	NEFL	1	0.0426312	41.448	QK(1)HSEPSR	3	0.068112	1	0.63	0.85	0.819	1.199	1.198	1.089
hsa04919 Thyroid hormone signaling pathway	0.0723073	5	2.15	Q09472	1769	4.035	Up	2.2499e-07	K	Histone acetyltransferase p300 OS=Homo sapiens OX=9606 GN=EP300 PE=1 SV=2	EP300	1	1.89332e-49	208.56	VVQHTK(1)GCK(1)R	2	0.47995	5	0.357	0.351	0.363	1.501	1.405	1.415
hsa04919 Thyroid hormone signaling pathway	0.0723073	5	2.15	Q09472	1772	11.928	Up	3.2215e-07	K	Histone acetyltransferase p300 OS=Homo sapiens OX=9606 GN=EP300 PE=1 SV=2	EP300	1	1.89332e-49	208.56	VVQHTK(1)GCK(1)R	2	0.47995	3	0.123	0.136	0.141	1.65	1.565	1.556
hsa04919 Thyroid hormone signaling pathway	0.0723073	5	2.15	Q09472	1762	7.585	Up	0.00119748	K	Histone acetyltransferase p300 OS=Homo sapiens OX=9606 GN=EP300 PE=1 SV=2	EP300	1	2.32223e-16	145.52	NANCSLPSCQK(1)MK(1)R	2	-1.3586	2	0.201	0.229	0.18	1.533	1.572	1.522
hsa04919 Thyroid hormone signaling pathway	0.0723073	5	2.15	Q09472	1774	3.958	Up	0.0092049	K	Histone acetyltransferase p300 OS=Homo sapiens OX=9606 GN=EP300 PE=1 SV=2	EP300	1	0.000167046	115.33	K(1)TNGGCPICK	3	-1.4801	4	0.287	0.344	0.456	1.437	1.433	1.432
hsa04919 Thyroid hormone signaling pathway	0.0723073	5	2.15	Q09472	1704	1.891	Up	5.0177e-07	K	Histone acetyltransferase p300 OS=Homo sapiens OX=9606 GN=EP300 PE=1 SV=2	EP300	1	2.47609e-10	80.688	NHDHK(1)MEK(1)LGLGLDDESNNQQAAATQSPGDSR	4	4.3749	6	0.642	0.664	0.659	1.234	1.257	1.224
hsa04919 Thyroid hormone signaling pathway	0.0723073	5	2.15	Q09472	1760	1.885	Up	3.5127e-06	K	Histone acetyltransferase p300 OS=Homo sapiens OX=9606 GN=EP300 PE=1 SV=2	EP300	1	2.32223e-16	145.52	NANCSLPSCQK(1)MK(1)R	2	-1.3586	5	0.642	0.648	0.679	1.223	1.266	1.222
hsa04919 Thyroid hormone signaling pathway	0.0723073	5	2.15	P36507	108	1.663	Up	0.0022007	K	Dual specificity mitogen-activated protein kinase kinase 2 OS=Homo sapiens OX=9606 GN=MAP2K2 PE=1 SV=1	MAP2K2	1	4.9811e-05	95.483	LIHLEIK(1)PAIR	3	-0.84799	1	0.79	0.663	0.705	1.236	1.078	1.275
hsa04919 Thyroid hormone signaling pathway	0.0723073	5	2.15	P63261	50	2.044	Up	0.00151871	K	Actin, cytoplasmic 2 OS=Homo sapiens OX=9606 GN=ACTG1 PE=1 SV=1	ACTG1	1	1.73645e-08	74.364	HQGVMVGMGQK(1)DSYVGDEAQSK	3	-0.91047	1	0.53	0.605	0.719	1.328	1.267	1.194
hsa04919 Thyroid hormone signaling pathway	0.0723073	5	2.15	Q92793	1811	7.596	Up	0.00094031	K	CREB-binding protein OS=Homo sapiens OX=9606 GN=CREBBP PE=1 SV=3	CREBBP	1	0.00377762	83.182	K(1)TNGGCPVCK	2	0.18561	1	0.185	0.196	0.228	1.546	1.535	1.545
hsa04919 Thyroid hormone signaling pathway	0.0723073	5	2.15	Q15382	97	1.749	Up	0.000122954	K	GTP-binding protein Rheb OS=Homo sapiens OX=9606 GN=RHEB PE=1 SV=1	RHEB	1	0.0026732	65.842	SFEVIK(1)VIHGK	3	1.1424	1	0.669	0.666	0.743	1.19	1.244	1.201
hsa05166 Human T-cell leukemia virus 1 infection	0.277725	5	1.41	Q09472	1769	4.035	Up	2.2499e-07	K	Histone acetyltransferase p300 OS=Homo sapiens OX=9606 GN=EP300 PE=1 SV=2	EP300	1	1.89332e-49	208.56	VVQHTK(1)GCK(1)R	2	0.47995	5	0.357	0.351	0.363	1.501	1.405	1.415
hsa05166 Human T-cell leukemia virus 1 infection	0.277725	5	1.41	Q09472	1772	11.928	Up	3.2215e-07	K	Histone acetyltransferase p300 OS=Homo sapiens OX=9606 GN=EP300 PE=1 SV=2	EP300	1	1.89332e-49	208.56	VVQHTK(1)GCK(1)R	2	0.47995	3	0.123	0.136	0.141	1.65	1.565	1.556
hsa05166 Human T-cell leukemia virus 1 infection	0.277725	5	1.41	Q09472	1762	7.585	Up	0.00119748	K	Histone acetyltransferase p300 OS=Homo sapiens OX=9606 GN=EP300 PE=1 SV=2	EP300	1	2.32223e-16	145.52	NANCSLPSCQK(1)MK(1)R	2	-1.3586	2	0.201	0.229	0.18	1.533	1.572	1.522
hsa05166 Human T-cell leukemia virus 1 infection	0.277725	5	1.41	Q09472	1774	3.958	Up	0.0092049	K	Histone acetyltransferase p300 OS=Homo sapiens OX=9606 GN=EP300 PE=1 SV=2	EP300	1	0.000167046	115.33	K(1)TNGGCPICK	3	-1.4801	4	0.287	0.344	0.456	1.437	1.433	1.432
hsa05166 Human T-cell leukemia virus 1 infection	0.277725	5	1.41	Q09472	1704	1.891	Up	5.0177e-07	K	Histone acetyltransferase p300 OS=Homo sapiens OX=9606 GN=EP300 PE=1 SV=2	EP300	1	2.47609e-10	80.688	NHDHK(1)MEK(1)LGLGLDDESNNQQAAATQSPGDSR	4	4.3749	6	0.642	0.664	0.659	1.234	1.257	1.224
hsa05166 Human T-cell leukemia virus 1 infection	0.277725	5	1.41	Q09472	1760	1.885	Up	3.5127e-06	K	Histone acetyltransferase p300 OS=Homo sapiens OX=9606 GN=EP300 PE=1 SV=2	EP300	1	2.32223e-16	145.52	NANCSLPSCQK(1)MK(1)R	2	-1.3586	5	0.642	0.648	0.679	1.223	1.266	1.222
hsa05166 Human T-cell leukemia virus 1 infection	0.277725	5	1.41	P36507	108	1.663	Up	0.0022007	K	Dual specificity mitogen-activated protein kinase kinase 2 OS=Homo sapiens OX=9606 GN=MAP2K2 PE=1 SV=1	MAP2K2	1	4.9811e-05	95.483	LIHLEIK(1)PAIR	3	-0.84799	1	0.79	0.663	0.705	1.236	1.078	1.275
hsa05166 Human T-cell leukemia virus 1 infection	0.277725	5	1.41	P27824	87	1.514	Up	0.00095527	K	Calnexin OS=Homo sapiens OX=9606 GN=CANX PE=1 SV=2	CANX	1	0.014782	46.88	GTLSGWILSK(1)AK	3	-0.67335	1	0.807	0.786	0.712	1.226	1.112	1.152
hsa05166 Human T-cell leukemia virus 1 infection	0.277725	5	1.41	P21796	61	1.877	Up	2.673e-06	K	Voltage-dependent anion-selective channel protein 1 OS=Homo sapiens OX=9606 GN=VDAC1 PE=1 SV=2	VDAC1	1	0.00011548	117.25	VTGSLETK(1)YR	3	1.0352	3	0.663	0.636	0.677	1.244	1.244	1.221
hsa05166 Human T-cell leukemia virus 1 infection	0.277725	5	1.41	P21796	20	1.506	Up	6.0692e-05	K	Voltage-dependent anion-selective channel protein 1 OS=Homo sapiens OX=9606 GN=VDAC1 PE=1 SV=2	VDAC1	1	5.63016e-11	131.66	DVFTK(1)GYGFGLIK	2	0.76596	2	0.765	0.794	0.754	1.198	1.157	1.128
hsa05166 Human T-cell leukemia virus 1 infection	0.277725	5	1.41	Q92793	1811	7.596	Up	0.00094031	K	CREB-binding protein OS=Homo sapiens OX=9606 GN=CREBBP PE=1 SV=3	CREBBP	1	0.00377762	83.182	K(1)TNGGCPVCK	2	0.18561	1	0.185	0.196	0.228	1.546	1.535	1.545
hsa00983 Drug metabolism - other enzymes	0.87849	1	0.51	P11172	314	3.176	Up	6.5206e-07	K	Uridine 5'-monophosphate synthase OS=Homo sapiens OX=9606 GN=UMPS PE=1 SV=1	UMPS	1	0.000819799	82.489	K(1)FADIGNTVK	3	1.6372	2	0.43	0.446	0.433	1.439	1.332	1.387
hsa05416 Viral myocarditis	0.0102216	4	4.08	P63261	50	2.044	Up	0.00151871	K	Actin, cytoplasmic 2 OS=Homo sapiens OX=9606 GN=ACTG1 PE=1 SV=1	ACTG1	1	1.73645e-08	74.364	HQGVMVGMGQK(1)DSYVGDEAQSK	3	-0.91047	1	0.53	0.605	0.719	1.328	1.267	1.194
hsa05416 Viral myocarditis	0.0102216	4	4.08	P24043	3092	1.918	Up	1.50302e-05	K	Laminin subunit alpha-2 OS=Homo sapiens OX=9606 GN=LAMA2 PE=1 SV=4	LAMA2	1	0.0350388	67.385	GCIRSLK(1)LTK	2	3.4243	1	0.661	0.626	0.658	1.283	1.221	1.227
hsa05416 Viral myocarditis	0.0102216	4	4.08	Q03135	57	1.523	Up	0.0012176	K	Caveolin-1 OS=Homo sapiens OX=9606 GN=CAV1 PE=1 SV=4	CAV1	1	0.00201216	67.997	DPK(1)HLNDDVVK	3	1.0261	1	0.694	0.781	0.816	1.145	1.139	1.206
hsa05416 Viral myocarditis	0.0102216	4	4.08	P08174	161	4.927	Up	1.8954e-06	K	Complement decay-accelerating factor OS=Homo sapiens OX=9606 GN=CD55 PE=1 SV=4	CD55	1	0.000511591	92.611	K(1)SCPNPGEIR	2	-0.92109	3	0.289	0.285	0.326	1.505	1.493	1.436
hsa04210 Apoptosis	0.182754	5	1.63	P53634	162	3.108	Up	0.00042277	K	Dipeptidyl peptidase 1 OS=Homo sapiens OX=9606 GN=CTSC PE=1 SV=2	CTSC	1	0.0014128	98.156	NSQEK(1)YSNR	2	-0.30772	1	0.369	0.439	0.525	1.453	1.385	1.305
hsa04210 Apoptosis	0.182754	5	1.63	Q13813	296	1.717	Up	0.0100175	K	Spectrin alpha chain, non-erythrocytic 1 OS=Homo sapiens OX=9606 GN=SPTAN1 PE=1 SV=3	SPTAN1	1	0.0243338	65.246	K(1)HEGLER	3	1.0588	1	0.744	0.691	0.678	1.258	1.405	0.965
hsa04210 Apoptosis	0.182754	5	1.63	P36507	108	1.663	Up	0.0022007	K	Dual specificity mitogen-activated protein kinase kinase 2 OS=Homo sapiens OX=9606 GN=MAP2K2 PE=1 SV=1	MAP2K2	1	4.9811e-05	95.483	LIHLEIK(1)PAIR	3	-0.84799	1	0.79	0.663	0.705	1.236	1.078	1.275
hsa04210 Apoptosis	0.182754	5	1.63	P63261	50	2.044	Up	0.00151871	K	Actin, cytoplasmic 2 OS=Homo sapiens OX=9606 GN=ACTG1 PE=1 SV=1	ACTG1	1	1.73645e-08	74.364	HQGVMVGMGQK(1)DSYVGDEAQSK	3	-0.91047	1	0.53	0.605	0.719	1.328	1.267	1.194
hsa04210 Apoptosis	0.182754	5	1.63	O95831	518	1.536	Up	0.00075992	K	Apoptosis-inducing factor 1, mitochondrial OS=Homo sapiens OX=9606 GN=AIFM1 PE=1 SV=1	AIFM1	1	5.47123e-15	123.42	ATAQDNPK(1)SATEQSGTGIR	3	1.6671	1	0.756	0.746	0.778	1.17	1.076	1.255
hsa04370 VEGF signaling pathway	0.352083	2	1.63	P15692	149	1.52	Up	0.0183197	K	Vascular endothelial growth factor A OS=Homo sapiens OX=9606 GN=VEGFA PE=1 SV=2	VEGFA	1	0.0158118	68.016	GK(1)GK(1)GQK(1)R	3	0.20842	1	0.619	0.836	0.835	1.054	1.197	1.23
hsa04370 VEGF signaling pathway	0.352083	2	1.63	P15692	147	1.52	Up	0.0183197	K	Vascular endothelial growth factor A OS=Homo sapiens OX=9606 GN=VEGFA PE=1 SV=2	VEGFA	1	0.0158118	68.016	GK(1)GK(1)GQK(1)R	3	0.20842	1	0.619	0.836	0.835	1.054	1.197	1.23
hsa04370 VEGF signaling pathway	0.352083	2	1.63	P15692	152	1.52	Up	0.0183197	K	Vascular endothelial growth factor A OS=Homo sapiens OX=9606 GN=VEGFA PE=1 SV=2	VEGFA	1	0.0158118	68.016	GK(1)GK(1)GQK(1)R	3	0.20842	1	0.619	0.836	0.835	1.054	1.197	1.23
hsa04370 VEGF signaling pathway	0.352083	2	1.63	P36507	108	1.663	Up	0.0022007	K	Dual specificity mitogen-activated protein kinase kinase 2 OS=Homo sapiens OX=9606 GN=MAP2K2 PE=1 SV=1	MAP2K2	1	4.9811e-05	95.483	LIHLEIK(1)PAIR	3	-0.84799	1	0.79	0.663	0.705	1.236	1.078	1.275
hsa00562 Inositol phosphate metabolism	0.544675	1	1.36	Q8TBX8	99	1.512	Up	0.0178419	K	Phosphatidylinositol 5-phosphate 4-kinase type-2 gamma OS=Homo sapiens OX=9606 GN=PIP4K2C PE=1 SV=3	PIP4K2C	1	6.30063e-05	96.229	ENLPSHFK(1)FK	3	1.5003	1	0.766	0.805	0.732	1.171	0.957	1.353
hsa04071 Sphingolipid signaling pathway	0.918445	1	0.43	P36507	108	1.663	Up	0.0022007	K	Dual specificity mitogen-activated protein kinase kinase 2 OS=Homo sapiens OX=9606 GN=MAP2K2 PE=1 SV=1	MAP2K2	1	4.9811e-05	95.483	LIHLEIK(1)PAIR	3	-0.84799	1	0.79	0.663	0.705	1.236	1.078	1.275
hsa04012 ErbB signaling pathway	0.352083	2	1.63	P36507	108	1.663	Up	0.0022007	K	Dual specificity mitogen-activated protein kinase kinase 2 OS=Homo sapiens OX=9606 GN=MAP2K2 PE=1 SV=1	MAP2K2	1	4.9811e-05	95.483	LIHLEIK(1)PAIR	3	-0.84799	1	0.79	0.663	0.705	1.236	1.078	1.275
hsa04012 ErbB signaling pathway	0.352083	2	1.63	Q13557	268	2.448	Up	0.00064196	K	Calcium/calmodulin-dependent protein kinase type II subunit delta OS=Homo sapiens OX=9606 GN=CAMK2D PE=1 SV=3	CAMK2D	1	9.73432e-06	94.09	ITASEALK(1)HPWICQR	3	-2.1026	1	0.448	0.594	0.572	1.394	1.259	1.298
hsa05034 Alcoholism	0.189105	6	1.53	Q99525	17	1.747	Up	0.020535	K	Histone H4-like protein type G OS=Homo sapiens OX=9606 GN=HIST1H4G PE=1 SV=1	HIST1H4G	1	0.00152844	84.31	GLGK(1)GGAK(1)CHR	3	1.0158	1	0.68	0.775	0.62	1.094	0.996	1.535
hsa05034 Alcoholism	0.189105	6	1.53	Q96KK5	37	1.556	Up	0.00027896	K	Histone H2A type 1-H OS=Homo sapiens OX=9606 GN=HIST1H2AH PE=1 SV=3	HIST1H2AH	1	0.012122	96.311	K(1)GNYAER	2	0.80708	1	0.728	0.743	0.79	1.238	1.142	1.138
hsa05034 Alcoholism	0.189105	6	1.53	Q96KK5	96	1.532	Up	0.000135907	K	Histone H2A type 1-H OS=Homo sapiens OX=9606 GN=HIST1H2AH PE=1 SV=3	HIST1H2AH	1	3.40253e-08	141.58	NDEELNK(1)LLGK	2	-0.23047	2	0.728	0.792	0.764	1.153	1.204	1.141
hsa05034 Alcoholism	0.189105	6	1.53	Q96KK5	126	1.639	Up	7.7928e-05	K	Histone H2A type 1-H OS=Homo sapiens OX=9606 GN=HIST1H2AH PE=1 SV=3	HIST1H2AH	1	0.00072571	91.318	TESHHK(1)AK	3	0.69454	6	0.726	0.693	0.76	1.222	1.176	1.174
hsa05034 Alcoholism	0.189105	6	1.53	P62805	92	2.182	Up	1.6411e-05	K	Histone H4 OS=Homo sapiens OX=9606 GN=H4C1 PE=1 SV=2	H4C1	1	6.24962e-36	186.16	TVTAMDVVYALK(1)R	2	-0.23684	16	0.562	0.581	0.621	1.289	1.292	1.268
hsa05034 Alcoholism	0.189105	6	1.53	P62805	32	1.653	Up	0.0134408	K	Histone H4 OS=Homo sapiens OX=9606 GN=H4C1 PE=1 SV=2	H4C1	1	3.04485e-08	128.68	DNIQGITK(1)PAIR	2	0.4573	2	0.677	0.679	0.809	1.203	1.199	1.177
hsa05034 Alcoholism	0.189105	6	1.53	P62805	80	2.391	Up	2.114e-07	K	Histone H4 OS=Homo sapiens OX=9606 GN=H4C1 PE=1 SV=2	H4C1	1	3.87738e-17	153.23	K(1)TVTAMDVVYALK(1)R	3	-0.75923	21	0.556	0.541	0.548	1.342	1.293	1.298
hsa05034 Alcoholism	0.189105	6	1.53	P62805	78	1.846	Up	1.73873e-05	K	Histone H4 OS=Homo sapiens OX=9606 GN=H4C1 PE=1 SV=2	H4C1	1	3.72767e-11	151.98	DAVTYTEHAK(1)R	2	0.33428	3	0.693	0.658	0.65	1.26	1.199	1.235
hsa05034 Alcoholism	0.189105	6	1.53	P62805	17	1.611	Up	2.4396e-05	K	Histone H4 OS=Homo sapiens OX=9606 GN=H4C1 PE=1 SV=2	H4C1	1	1.37446e-45	190.24	GLGK(1)GGAK(1)R	2	-1.3239	136	0.728	0.747	0.73	1.202	1.136	1.215
hsa05034 Alcoholism	0.189105	6	1.53	Q71DI3	19	1.533	Up	0.034541	K	Histone H3.2 OS=Homo sapiens OX=9606 GN=HIST2H3A PE=1 SV=3	HIST2H3A	1	2.45577e-18	167.09	STGGK(1)APRK(1)QLATK(1)AAR	2	0.22427	41	0.669	0.886	0.726	1.238	0.937	1.322
hsa05034 Alcoholism	0.189105	6	1.53	Q71DI3	10	1.777	Up	3.3362e-06	K	Histone H3.2 OS=Homo sapiens OX=9606 GN=HIST2H3A PE=1 SV=3	HIST2H3A	1	0.00024356	111.61	QTARK(1)STGGK(1)APR	2	0.94869	19	0.696	0.688	0.673	1.253	1.186	1.216
hsa05034 Alcoholism	0.189105	6	1.53	P0C0S5	8	2.197	Up	4.9094e-07	K	Histone H2A.Z OS=Homo sapiens OX=9606 GN=H2AZ1 PE=1 SV=2	H2AZ1	1	2.41356e-07	111.64	AGK(1)DSGK(1)AK(1)TK	2	0.79948	12	0.591	0.582	0.583	1.323	1.257	1.278
hsa05034 Alcoholism	0.189105	6	1.53	P0C0S5	12	2.225	Up	3.9617e-07	K	Histone H2A.Z OS=Homo sapiens OX=9606 GN=H2AZ1 PE=1 SV=2	H2AZ1	1	2.41356e-07	111.64	AGK(1)DSGK(1)AK(1)TK	2	0.79948	10	0.585	0.579	0.575	1.326	1.264	1.279
hsa05034 Alcoholism	0.189105	6	1.53	P0C0S5	5	1.669	Up	5.8561e-05	K	Histone H2A.Z OS=Homo sapiens OX=9606 GN=H2AZ1 PE=1 SV=2	H2AZ1	1	2.41356e-07	111.64	AGGK(1)AGK(1)DSGK(1)AK(1)TK	2	0.11281	10	0.749	0.714	0.689	1.227	1.164	1.201
hsa05034 Alcoholism	0.189105	6	1.53	P0C0S5	14	2.729	Up	2.1717e-06	K	Histone H2A.Z OS=Homo sapiens OX=9606 GN=H2AZ1 PE=1 SV=2	H2AZ1	1	2.41356e-07	106.57	AGK(1)DSGK(1)AK(1)TK	2	0.79948	4	0.511	0.491	0.48	1.402	1.295	1.348
hsa05034 Alcoholism	0.189105	6	1.53	Q71UI9	8	1.776	Up	7.1996e-08	K	Histone H2A.V OS=Homo sapiens OX=9606 GN=H2AFV PE=1 SV=3	H2AFV	1	5.25348e-06	111.64	AGK(1)DSGK(1)AK(1)AK	2	0.56256	10	0.682	0.683	0.692	1.231	1.214	1.209
hsa05034 Alcoholism	0.189105	6	1.53	Q71UI9	12	1.771	Up	4.7604e-08	K	Histone H2A.V OS=Homo sapiens OX=9606 GN=H2AFV PE=1 SV=3	H2AFV	1	5.25348e-06	111.64	AGK(1)DSGK(1)AK(1)AK	2	0.56256	8	0.684	0.688	0.689	1.228	1.219	1.203
hsa05034 Alcoholism	0.189105	6	1.53	Q71UI9	14	1.84	Up	6.056e-07	K	Histone H2A.V OS=Homo sapiens OX=9606 GN=H2AFV PE=1 SV=3	H2AFV	1	0.00142022	96.464	AGK(1)DSGK(1)AK(1)AK	2	0.56256	2	0.675	0.674	0.655	1.23	1.211	1.247
hsa05204 Chemical carcinogenesis	0.764422	1	0.74	P47895	423	1.504	Up	1.81114e-05	K	Aldehyde dehydrogenase family 1 member A3 OS=Homo sapiens OX=9606 GN=ALDH1A3 PE=1 SV=2	ALDH1A3	1	3.01099e-05	135.99	FK(1)SIEEVIK	2	-0.13248	1	0.763	0.772	0.78	1.196	1.14	1.145
hsa04929 GnRH secretion	0.480722	1	1.63	P36507	108	1.663	Up	0.0022007	K	Dual specificity mitogen-activated protein kinase kinase 2 OS=Homo sapiens OX=9606 GN=MAP2K2 PE=1 SV=1	MAP2K2	1	4.9811e-05	95.483	LIHLEIK(1)PAIR	3	-0.84799	1	0.79	0.663	0.705	1.236	1.078	1.275
hsa04152 AMPK signaling pathway	0.697968	2	0.86	P13639	32	1.652	Up	0.0028208	K	Elongation factor 2 OS=Homo sapiens OX=9606 GN=EEF2 PE=1 SV=4	EEF2	1	0.000910029	50.858	NMSVIAHVDHGK(1)STLTDSLVCK	4	-0.77941	1	0.655	0.728	0.777	1.058	1.229	1.282
hsa04152 AMPK signaling pathway	0.697968	2	0.86	Q15382	97	1.749	Up	0.000122954	K	GTP-binding protein Rheb OS=Homo sapiens OX=9606 GN=RHEB PE=1 SV=1	RHEB	1	0.0026732	65.842	SFEVIK(1)VIHGK	3	1.1424	1	0.669	0.666	0.743	1.19	1.244	1.201
hsa03030 DNA replication	0.173819	3	2.04	P39748	375	1.672	Up	0.00041838	K	Flap endonuclease 1 OS=Homo sapiens OX=9606 GN=FEN1 PE=1 SV=1	FEN1	1	0.00781029	71.379	TGAAGK(1)FK	3	0.36582	1	0.705	0.708	0.735	1.166	1.305	1.121
hsa03030 DNA replication	0.173819	3	2.04	P27694	163	2.076	Up	1.81648e-05	K	Replication protein A 70 kDa DNA-binding subunit OS=Homo sapiens OX=9606 GN=RPA1 PE=1 SV=2	RPA1	1	9.99335e-08	143.97	AYGASK(1)TFGK	3	1.1683	2	0.616	0.618	0.6	1.341	1.243	1.224
hsa03030 DNA replication	0.173819	3	2.04	Q14566	407	1.656	Up	0.00065503	K	DNA replication licensing factor MCM6 OS=Homo sapiens OX=9606 GN=MCM6 PE=1 SV=1	MCM6	1	0.0114761	46.318	SQFLK(1)HVEEFSPR	3	-1.3201	1	0.727	0.75	0.689	1.303	1.168	1.116
hsa04662 B cell receptor signaling pathway	0.650049	1	1.02	P36507	108	1.663	Up	0.0022007	K	Dual specificity mitogen-activated protein kinase kinase 2 OS=Homo sapiens OX=9606 GN=MAP2K2 PE=1 SV=1	MAP2K2	1	4.9811e-05	95.483	LIHLEIK(1)PAIR	3	-0.84799	1	0.79	0.663	0.705	1.236	1.078	1.275
hsa00120 Primary bile acid biosynthesis	0.230306	1	4.08	P51659	644	1.711	Up	3.2606e-06	K	Peroxisomal multifunctional enzyme type 2 OS=Homo sapiens OX=9606 GN=HSD17B4 PE=1 SV=3	HSD17B4	1	0.00199147	78.488	DIGPEVVK(1)K	3	-0.57914	2	0.692	0.726	0.695	1.207	1.187	1.221
hsa05223 Non-small cell lung cancer	0.693261	1	0.91	P36507	108	1.663	Up	0.0022007	K	Dual specificity mitogen-activated protein kinase kinase 2 OS=Homo sapiens OX=9606 GN=MAP2K2 PE=1 SV=1	MAP2K2	1	4.9811e-05	95.483	LIHLEIK(1)PAIR	3	-0.84799	1	0.79	0.663	0.705	1.236	1.078	1.275
hsa04928 Parathyroid hormone synthesis, secretion and action	0.731169	1	0.82	O75197	526	6.771	Up	0.0093419	K	Low-density lipoprotein receptor-related protein 5 OS=Homo sapiens OX=9606 GN=LRP5 PE=1 SV=2	LRP5	1	0.0142367	76.073	TDK(1)IEVINVDGTK	2	2.3659	1	0.196	0.27	0.207	1.517	0.67	2.37
hsa04976 Bile secretion	0.650049	1	1.02	P04920	893	4.44	Up	4.2628e-05	K	Anion exchange protein 2 OS=Homo sapiens OX=9606 GN=SLC4A2 PE=1 SV=4	SLC4A2	1	2.23352e-06	112.42	SLAGQSGQGK(1)PR	2	-2.3535	1	0.287	0.375	0.323	1.476	1.415	1.482
hsa00650 Butanoate metabolism	0.352083	2	1.63	Q16836	301	1.579	Up	0.00090275	K	Hydroxyacyl-coenzyme A dehydrogenase, mitochondrial OS=Homo sapiens OX=9606 GN=HADH PE=1 SV=3	HADH	1	0.00585392	66.27	LVAENK(1)FGK	3	0.9182	1	0.745	0.808	0.684	1.199	1.132	1.202
hsa00650 Butanoate metabolism	0.352083	2	1.63	P0C7M7	566	1.915	Up	0.000163329	K	Acyl-coenzyme A synthetase ACSM4, mitochondrial OS=Homo sapiens OX=9606 GN=ACSM4 PE=2 SV=1	ACSM4	1	0.0260859	81.296	TITGK(1)IK	2	0.050763	1	0.69	0.592	0.664	1.211	1.257	1.259
hsa05222 Small cell lung cancer	0.0251717	4	3.26	P23229	144	3.768	Up	1.57151e-05	K	Integrin alpha-6 OS=Homo sapiens OX=9606 GN=ITGA6 PE=1 SV=5	ITGA6	1	3.1719e-06	130.01	QHVNTK(1)QESR	2	1.0391	2	0.354	0.398	0.382	1.474	1.325	1.474
hsa05222 Small cell lung cancer	0.0251717	4	3.26	P23229	594	2.852	Up	0.0097615	K	Integrin alpha-6 OS=Homo sapiens OX=9606 GN=ITGA6 PE=1 SV=5	ITGA6	1	0.0014851	102.53	YTQELTLK(1)R	2	0.55207	2	0.382	0.524	0.521	1.331	1.345	1.394
hsa05222 Small cell lung cancer	0.0251717	4	3.26	P24043	3092	1.918	Up	1.50302e-05	K	Laminin subunit alpha-2 OS=Homo sapiens OX=9606 GN=LAMA2 PE=1 SV=4	LAMA2	1	0.0350388	67.385	GCIRSLK(1)LTK	2	3.4243	1	0.661	0.626	0.658	1.283	1.221	1.227
hsa05222 Small cell lung cancer	0.0251717	4	3.26	Q16787	2135	1.622	Up	3.461e-06	K	Laminin subunit alpha-3 OS=Homo sapiens OX=9606 GN=LAMA3 PE=1 SV=2	LAMA3	1	0.000133898	89.507	SAGK(1)TSLVEEAEK	2	-0.15811	2	0.721	0.727	0.746	1.166	1.178	1.214
hsa05222 Small cell lung cancer	0.0251717	4	3.26	P17301	261	4.97	Up	7.7205e-05	K	Integrin alpha-2 OS=Homo sapiens OX=9606 GN=ITGA2 PE=1 SV=1	ITGA2	1	5.75495e-08	138.89	K(1)YAYSAASGGR	2	-0.52946	1	0.253	0.307	0.334	1.631	1.406	1.406
hsa03013 RNA transport	0.999388	2	0.22	Q9HAU5	655	2.502	Up	0.00068041	K	Regulator of nonsense transcripts 2 OS=Homo sapiens OX=9606 GN=UPF2 PE=1 SV=1	UPF2	1	0.0107852	75.819	K(1)DQINIETK	2	0.6534	1	0.517	0.515	0.554	1.314	1.325	1.329
hsa03013 RNA transport	0.999388	2	0.22	Q7L576	1188	1.882	Up	5.6212e-05	K	Cytoplasmic FMR1-interacting protein 1 OS=Homo sapiens OX=9606 GN=CYFIP1 PE=1 SV=1	CYFIP1	0.999952	0.000231257	89.231	VQK(1)HDGKDEIIK	4	-1.3205	2	0.634	0.688	0.65	1.296	1.192	1.224
hsa04066 HIF-1 signaling pathway	0.0152458	8	2.33	P15692	149	1.52	Up	0.0183197	K	Vascular endothelial growth factor A OS=Homo sapiens OX=9606 GN=VEGFA PE=1 SV=2	VEGFA	1	0.0158118	68.016	GK(1)GK(1)GQK(1)R	3	0.20842	1	0.619	0.836	0.835	1.054	1.197	1.23
hsa04066 HIF-1 signaling pathway	0.0152458	8	2.33	P15692	147	1.52	Up	0.0183197	K	Vascular endothelial growth factor A OS=Homo sapiens OX=9606 GN=VEGFA PE=1 SV=2	VEGFA	1	0.0158118	68.016	GK(1)GK(1)GQK(1)R	3	0.20842	1	0.619	0.836	0.835	1.054	1.197	1.23
hsa04066 HIF-1 signaling pathway	0.0152458	8	2.33	P15692	152	1.52	Up	0.0183197	K	Vascular endothelial growth factor A OS=Homo sapiens OX=9606 GN=VEGFA PE=1 SV=2	VEGFA	1	0.0158118	68.016	GK(1)GK(1)GQK(1)R	3	0.20842	1	0.619	0.836	0.835	1.054	1.197	1.23
hsa04066 HIF-1 signaling pathway	0.0152458	8	2.33	Q09472	1769	4.035	Up	2.2499e-07	K	Histone acetyltransferase p300 OS=Homo sapiens OX=9606 GN=EP300 PE=1 SV=2	EP300	1	1.89332e-49	208.56	VVQHTK(1)GCK(1)R	2	0.47995	5	0.357	0.351	0.363	1.501	1.405	1.415
hsa04066 HIF-1 signaling pathway	0.0152458	8	2.33	Q09472	1772	11.928	Up	3.2215e-07	K	Histone acetyltransferase p300 OS=Homo sapiens OX=9606 GN=EP300 PE=1 SV=2	EP300	1	1.89332e-49	208.56	VVQHTK(1)GCK(1)R	2	0.47995	3	0.123	0.136	0.141	1.65	1.565	1.556
hsa04066 HIF-1 signaling pathway	0.0152458	8	2.33	Q09472	1762	7.585	Up	0.00119748	K	Histone acetyltransferase p300 OS=Homo sapiens OX=9606 GN=EP300 PE=1 SV=2	EP300	1	2.32223e-16	145.52	NANCSLPSCQK(1)MK(1)R	2	-1.3586	2	0.201	0.229	0.18	1.533	1.572	1.522
hsa04066 HIF-1 signaling pathway	0.0152458	8	2.33	Q09472	1774	3.958	Up	0.0092049	K	Histone acetyltransferase p300 OS=Homo sapiens OX=9606 GN=EP300 PE=1 SV=2	EP300	1	0.000167046	115.33	K(1)TNGGCPICK	3	-1.4801	4	0.287	0.344	0.456	1.437	1.433	1.432
hsa04066 HIF-1 signaling pathway	0.0152458	8	2.33	Q09472	1704	1.891	Up	5.0177e-07	K	Histone acetyltransferase p300 OS=Homo sapiens OX=9606 GN=EP300 PE=1 SV=2	EP300	1	2.47609e-10	80.688	NHDHK(1)MEK(1)LGLGLDDESNNQQAAATQSPGDSR	4	4.3749	6	0.642	0.664	0.659	1.234	1.257	1.224
hsa04066 HIF-1 signaling pathway	0.0152458	8	2.33	Q09472	1760	1.885	Up	3.5127e-06	K	Histone acetyltransferase p300 OS=Homo sapiens OX=9606 GN=EP300 PE=1 SV=2	EP300	1	2.32223e-16	145.52	NANCSLPSCQK(1)MK(1)R	2	-1.3586	5	0.642	0.648	0.679	1.223	1.266	1.222
hsa04066 HIF-1 signaling pathway	0.0152458	8	2.33	P00338	222	1.546	Up	0.0049956	K	L-lactate dehydrogenase A chain OS=Homo sapiens OX=9606 GN=LDHA PE=1 SV=2	LDHA	1	0.000110087	92.295	TLHPDLGTDK(1)DK	3	0.56364	1	0.676	0.813	0.781	1.204	1.256	1.05
hsa04066 HIF-1 signaling pathway	0.0152458	8	2.33	P04075	200	1.909	Up	0.00039957	K	Fructose-bisphosphate aldolase A OS=Homo sapiens OX=9606 GN=ALDOA PE=1 SV=2	ALDOA	1	1.06057e-28	125	YASICQQNGIVPIVEPEILPDGDHDLK(1)R	3	-1.6772	8	0.693	0.577	0.681	1.214	1.249	1.262
hsa04066 HIF-1 signaling pathway	0.0152458	8	2.33	P04075	108	1.531	Up	0.00098334	K	Fructose-bisphosphate aldolase A OS=Homo sapiens OX=9606 GN=ALDOA PE=1 SV=2	ALDOA	1	0.000445929	92.866	GGVVGIK(1)VDK	2	0.15856	1	0.727	0.722	0.837	1.193	1.157	1.149
hsa04066 HIF-1 signaling pathway	0.0152458	8	2.33	P36507	108	1.663	Up	0.0022007	K	Dual specificity mitogen-activated protein kinase kinase 2 OS=Homo sapiens OX=9606 GN=MAP2K2 PE=1 SV=1	MAP2K2	1	4.9811e-05	95.483	LIHLEIK(1)PAIR	3	-0.84799	1	0.79	0.663	0.705	1.236	1.078	1.275
hsa04066 HIF-1 signaling pathway	0.0152458	8	2.33	Q13557	268	2.448	Up	0.00064196	K	Calcium/calmodulin-dependent protein kinase type II subunit delta OS=Homo sapiens OX=9606 GN=CAMK2D PE=1 SV=3	CAMK2D	1	9.73432e-06	94.09	ITASEALK(1)HPWICQR	3	-2.1026	1	0.448	0.594	0.572	1.394	1.259	1.298
hsa04066 HIF-1 signaling pathway	0.0152458	8	2.33	P62753	243	1.631	Up	0.000121433	K	40S ribosomal protein S6 OS=Homo sapiens OX=9606 GN=RPS6 PE=1 SV=1	RPS6	1	1.94239e-06	121.29	ASTSK(1)SESSQK	2	0.72863	2	0.736	0.685	0.766	1.194	1.197	1.175
hsa04066 HIF-1 signaling pathway	0.0152458	8	2.33	Q92793	1811	7.596	Up	0.00094031	K	CREB-binding protein OS=Homo sapiens OX=9606 GN=CREBBP PE=1 SV=3	CREBBP	1	0.00377762	83.182	K(1)TNGGCPVCK	2	0.18561	1	0.185	0.196	0.228	1.546	1.535	1.545
hsa04145 Phagosome	0.518479	3	1.11	P27824	87	1.514	Up	0.00095527	K	Calnexin OS=Homo sapiens OX=9606 GN=CANX PE=1 SV=2	CANX	1	0.014782	46.88	GTLSGWILSK(1)AK	3	-0.67335	1	0.807	0.786	0.712	1.226	1.112	1.152
hsa04145 Phagosome	0.518479	3	1.11	P63261	50	2.044	Up	0.00151871	K	Actin, cytoplasmic 2 OS=Homo sapiens OX=9606 GN=ACTG1 PE=1 SV=1	ACTG1	1	1.73645e-08	74.364	HQGVMVGMGQK(1)DSYVGDEAQSK	3	-0.91047	1	0.53	0.605	0.719	1.328	1.267	1.194
hsa04145 Phagosome	0.518479	3	1.11	P17301	261	4.97	Up	7.7205e-05	K	Integrin alpha-2 OS=Homo sapiens OX=9606 GN=ITGA2 PE=1 SV=1	ITGA2	1	5.75495e-08	138.89	K(1)YAYSAASGGR	2	-0.52946	1	0.253	0.307	0.334	1.631	1.406	1.406
hsa00240 Pyrimidine metabolism	0.819163	1	0.63	P11172	314	3.176	Up	6.5206e-07	K	Uridine 5'-monophosphate synthase OS=Homo sapiens OX=9606 GN=UMPS PE=1 SV=1	UMPS	1	0.000819799	82.489	K(1)FADIGNTVK	3	1.6372	2	0.43	0.446	0.433	1.439	1.332	1.387
hsa00350 Tyrosine metabolism	0.352083	2	1.63	P17174	97	1.571	Up	0.0062823	K	Aspartate aminotransferase, cytoplasmic OS=Homo sapiens OX=9606 GN=GOT1 PE=1 SV=3	GOT1	1	0.000526115	69.03	LALGDDSPALK(1)EK	3	4.0464	1	0.768	0.717	0.76	1.092	1.374	1.06
hsa00350 Tyrosine metabolism	0.352083	2	1.63	P47895	423	1.504	Up	1.81114e-05	K	Aldehyde dehydrogenase family 1 member A3 OS=Homo sapiens OX=9606 GN=ALDH1A3 PE=1 SV=2	ALDH1A3	1	3.01099e-05	135.99	FK(1)SIEEVIK	2	-0.13248	1	0.763	0.772	0.78	1.196	1.14	1.145
hsa04520 Adherens junction	0.0723073	5	2.15	Q09472	1769	4.035	Up	2.2499e-07	K	Histone acetyltransferase p300 OS=Homo sapiens OX=9606 GN=EP300 PE=1 SV=2	EP300	1	1.89332e-49	208.56	VVQHTK(1)GCK(1)R	2	0.47995	5	0.357	0.351	0.363	1.501	1.405	1.415
hsa04520 Adherens junction	0.0723073	5	2.15	Q09472	1772	11.928	Up	3.2215e-07	K	Histone acetyltransferase p300 OS=Homo sapiens OX=9606 GN=EP300 PE=1 SV=2	EP300	1	1.89332e-49	208.56	VVQHTK(1)GCK(1)R	2	0.47995	3	0.123	0.136	0.141	1.65	1.565	1.556
hsa04520 Adherens junction	0.0723073	5	2.15	Q09472	1762	7.585	Up	0.00119748	K	Histone acetyltransferase p300 OS=Homo sapiens OX=9606 GN=EP300 PE=1 SV=2	EP300	1	2.32223e-16	145.52	NANCSLPSCQK(1)MK(1)R	2	-1.3586	2	0.201	0.229	0.18	1.533	1.572	1.522
hsa04520 Adherens junction	0.0723073	5	2.15	Q09472	1774	3.958	Up	0.0092049	K	Histone acetyltransferase p300 OS=Homo sapiens OX=9606 GN=EP300 PE=1 SV=2	EP300	1	0.000167046	115.33	K(1)TNGGCPICK	3	-1.4801	4	0.287	0.344	0.456	1.437	1.433	1.432
hsa04520 Adherens junction	0.0723073	5	2.15	Q09472	1704	1.891	Up	5.0177e-07	K	Histone acetyltransferase p300 OS=Homo sapiens OX=9606 GN=EP300 PE=1 SV=2	EP300	1	2.47609e-10	80.688	NHDHK(1)MEK(1)LGLGLDDESNNQQAAATQSPGDSR	4	4.3749	6	0.642	0.664	0.659	1.234	1.257	1.224
hsa04520 Adherens junction	0.0723073	5	2.15	Q09472	1760	1.885	Up	3.5127e-06	K	Histone acetyltransferase p300 OS=Homo sapiens OX=9606 GN=EP300 PE=1 SV=2	EP300	1	2.32223e-16	145.52	NANCSLPSCQK(1)MK(1)R	2	-1.3586	5	0.642	0.648	0.679	1.223	1.266	1.222
hsa04520 Adherens junction	0.0723073	5	2.15	P63261	50	2.044	Up	0.00151871	K	Actin, cytoplasmic 2 OS=Homo sapiens OX=9606 GN=ACTG1 PE=1 SV=1	ACTG1	1	1.73645e-08	74.364	HQGVMVGMGQK(1)DSYVGDEAQSK	3	-0.91047	1	0.53	0.605	0.719	1.328	1.267	1.194
hsa04520 Adherens junction	0.0723073	5	2.15	Q92793	1811	7.596	Up	0.00094031	K	CREB-binding protein OS=Homo sapiens OX=9606 GN=CREBBP PE=1 SV=3	CREBBP	1	0.00377762	83.182	K(1)TNGGCPVCK	2	0.18561	1	0.185	0.196	0.228	1.546	1.535	1.545
hsa04520 Adherens junction	0.0723073	5	2.15	P35221	881	1.511	Up	0.00040268	K	Catenin alpha-1 OS=Homo sapiens OX=9606 GN=CTNNA1 PE=1 SV=1	CTNNA1	1	0.00164808	73.927	EKQDETQTK(1)IK	3	0.98541	1	0.774	0.811	0.723	1.193	1.172	1.122
hsa04520 Adherens junction	0.0723073	5	2.15	O43707	779	1.506	Up	4.621e-06	K	Alpha-actinin-4 OS=Homo sapiens OX=9606 GN=ACTN4 PE=1 SV=2	ACTN4	1	2.1119e-07	92.098	ASFNHFDK(1)DHGGALGPEEFK	4	-0.48137	1	0.769	0.755	0.788	1.156	1.148	1.177
hsa00030 Pentose phosphate pathway	0.566312	2	1.09	P29401	283	1.66	Up	0.0096592	K	Transketolase OS=Homo sapiens OX=9606 GN=TKT PE=1 SV=3	TKT	1	1.52026e-05	65.887	K(1)ILATPPQEDAPSVDIANIR	3	0.18279	1	0.831	0.619	0.709	1.16	1.07	1.353
hsa00030 Pentose phosphate pathway	0.566312	2	1.09	P04075	200	1.909	Up	0.00039957	K	Fructose-bisphosphate aldolase A OS=Homo sapiens OX=9606 GN=ALDOA PE=1 SV=2	ALDOA	1	1.06057e-28	125	YASICQQNGIVPIVEPEILPDGDHDLK(1)R	3	-1.6772	8	0.693	0.577	0.681	1.214	1.249	1.262
hsa00030 Pentose phosphate pathway	0.566312	2	1.09	P04075	108	1.531	Up	0.00098334	K	Fructose-bisphosphate aldolase A OS=Homo sapiens OX=9606 GN=ALDOA PE=1 SV=2	ALDOA	1	0.000445929	92.866	GGVVGIK(1)VDK	2	0.15856	1	0.727	0.722	0.837	1.193	1.157	1.149
hsa04611 Platelet activation	0.636747	2	0.96	P63261	50	2.044	Up	0.00151871	K	Actin, cytoplasmic 2 OS=Homo sapiens OX=9606 GN=ACTG1 PE=1 SV=1	ACTG1	1	1.73645e-08	74.364	HQGVMVGMGQK(1)DSYVGDEAQSK	3	-0.91047	1	0.53	0.605	0.719	1.328	1.267	1.194
hsa04611 Platelet activation	0.636747	2	0.96	P17301	261	4.97	Up	7.7205e-05	K	Integrin alpha-2 OS=Homo sapiens OX=9606 GN=ITGA2 PE=1 SV=1	ITGA2	1	5.75495e-08	138.89	K(1)YAYSAASGGR	2	-0.52946	1	0.253	0.307	0.334	1.631	1.406	1.406
hsa04330 Notch signaling pathway	0.116406	2	3.26	Q09472	1769	4.035	Up	2.2499e-07	K	Histone acetyltransferase p300 OS=Homo sapiens OX=9606 GN=EP300 PE=1 SV=2	EP300	1	1.89332e-49	208.56	VVQHTK(1)GCK(1)R	2	0.47995	5	0.357	0.351	0.363	1.501	1.405	1.415
hsa04330 Notch signaling pathway	0.116406	2	3.26	Q09472	1772	11.928	Up	3.2215e-07	K	Histone acetyltransferase p300 OS=Homo sapiens OX=9606 GN=EP300 PE=1 SV=2	EP300	1	1.89332e-49	208.56	VVQHTK(1)GCK(1)R	2	0.47995	3	0.123	0.136	0.141	1.65	1.565	1.556
hsa04330 Notch signaling pathway	0.116406	2	3.26	Q09472	1762	7.585	Up	0.00119748	K	Histone acetyltransferase p300 OS=Homo sapiens OX=9606 GN=EP300 PE=1 SV=2	EP300	1	2.32223e-16	145.52	NANCSLPSCQK(1)MK(1)R	2	-1.3586	2	0.201	0.229	0.18	1.533	1.572	1.522
hsa04330 Notch signaling pathway	0.116406	2	3.26	Q09472	1774	3.958	Up	0.0092049	K	Histone acetyltransferase p300 OS=Homo sapiens OX=9606 GN=EP300 PE=1 SV=2	EP300	1	0.000167046	115.33	K(1)TNGGCPICK	3	-1.4801	4	0.287	0.344	0.456	1.437	1.433	1.432
hsa04330 Notch signaling pathway	0.116406	2	3.26	Q09472	1704	1.891	Up	5.0177e-07	K	Histone acetyltransferase p300 OS=Homo sapiens OX=9606 GN=EP300 PE=1 SV=2	EP300	1	2.47609e-10	80.688	NHDHK(1)MEK(1)LGLGLDDESNNQQAAATQSPGDSR	4	4.3749	6	0.642	0.664	0.659	1.234	1.257	1.224
hsa04330 Notch signaling pathway	0.116406	2	3.26	Q09472	1760	1.885	Up	3.5127e-06	K	Histone acetyltransferase p300 OS=Homo sapiens OX=9606 GN=EP300 PE=1 SV=2	EP300	1	2.32223e-16	145.52	NANCSLPSCQK(1)MK(1)R	2	-1.3586	5	0.642	0.648	0.679	1.223	1.266	1.222
hsa04330 Notch signaling pathway	0.116406	2	3.26	Q92793	1811	7.596	Up	0.00094031	K	CREB-binding protein OS=Homo sapiens OX=9606 GN=CREBBP PE=1 SV=3	CREBBP	1	0.00377762	83.182	K(1)TNGGCPVCK	2	0.18561	1	0.185	0.196	0.228	1.546	1.535	1.545
hsa04972 Pancreatic secretion	0.764422	1	0.74	P04920	893	4.44	Up	4.2628e-05	K	Anion exchange protein 2 OS=Homo sapiens OX=9606 GN=SLC4A2 PE=1 SV=4	SLC4A2	1	2.23352e-06	112.42	SLAGQSGQGK(1)PR	2	-2.3535	1	0.287	0.375	0.323	1.476	1.415	1.482
hsa05161 Hepatitis B	0.161195	5	1.7	Q09472	1769	4.035	Up	2.2499e-07	K	Histone acetyltransferase p300 OS=Homo sapiens OX=9606 GN=EP300 PE=1 SV=2	EP300	1	1.89332e-49	208.56	VVQHTK(1)GCK(1)R	2	0.47995	5	0.357	0.351	0.363	1.501	1.405	1.415
hsa05161 Hepatitis B	0.161195	5	1.7	Q09472	1772	11.928	Up	3.2215e-07	K	Histone acetyltransferase p300 OS=Homo sapiens OX=9606 GN=EP300 PE=1 SV=2	EP300	1	1.89332e-49	208.56	VVQHTK(1)GCK(1)R	2	0.47995	3	0.123	0.136	0.141	1.65	1.565	1.556
hsa05161 Hepatitis B	0.161195	5	1.7	Q09472	1762	7.585	Up	0.00119748	K	Histone acetyltransferase p300 OS=Homo sapiens OX=9606 GN=EP300 PE=1 SV=2	EP300	1	2.32223e-16	145.52	NANCSLPSCQK(1)MK(1)R	2	-1.3586	2	0.201	0.229	0.18	1.533	1.572	1.522
hsa05161 Hepatitis B	0.161195	5	1.7	Q09472	1774	3.958	Up	0.0092049	K	Histone acetyltransferase p300 OS=Homo sapiens OX=9606 GN=EP300 PE=1 SV=2	EP300	1	0.000167046	115.33	K(1)TNGGCPICK	3	-1.4801	4	0.287	0.344	0.456	1.437	1.433	1.432
hsa05161 Hepatitis B	0.161195	5	1.7	Q09472	1704	1.891	Up	5.0177e-07	K	Histone acetyltransferase p300 OS=Homo sapiens OX=9606 GN=EP300 PE=1 SV=2	EP300	1	2.47609e-10	80.688	NHDHK(1)MEK(1)LGLGLDDESNNQQAAATQSPGDSR	4	4.3749	6	0.642	0.664	0.659	1.234	1.257	1.224
hsa05161 Hepatitis B	0.161195	5	1.7	Q09472	1760	1.885	Up	3.5127e-06	K	Histone acetyltransferase p300 OS=Homo sapiens OX=9606 GN=EP300 PE=1 SV=2	EP300	1	2.32223e-16	145.52	NANCSLPSCQK(1)MK(1)R	2	-1.3586	5	0.642	0.648	0.679	1.223	1.266	1.222
hsa05161 Hepatitis B	0.161195	5	1.7	P36507	108	1.663	Up	0.0022007	K	Dual specificity mitogen-activated protein kinase kinase 2 OS=Homo sapiens OX=9606 GN=MAP2K2 PE=1 SV=1	MAP2K2	1	4.9811e-05	95.483	LIHLEIK(1)PAIR	3	-0.84799	1	0.79	0.663	0.705	1.236	1.078	1.275
hsa05161 Hepatitis B	0.161195	5	1.7	Q16531	191	1.804	Up	3.8213e-05	K	DNA damage-binding protein 1 OS=Homo sapiens OX=9606 GN=DDB1 PE=1 SV=1	DDB1	1	5.7889e-05	94.363	HVK(1)TYEVSLR	3	-1.2231	2	0.644	0.677	0.712	1.233	1.223	1.211
hsa05161 Hepatitis B	0.161195	5	1.7	P31946	70	1.526	Up	0.0008628	K	14-3-3 protein beta/alpha OS=Homo sapiens OX=9606 GN=YWHAB PE=1 SV=3	YWHAB	1	1.60397e-05	106.67	VISSIEQK(1)TER	3	-0.051644	2	0.777	0.814	0.701	1.201	1.131	1.165
hsa05161 Hepatitis B	0.161195	5	1.7	Q92793	1811	7.596	Up	0.00094031	K	CREB-binding protein OS=Homo sapiens OX=9606 GN=CREBBP PE=1 SV=3	CREBBP	1	0.00377762	83.182	K(1)TNGGCPVCK	2	0.18561	1	0.185	0.196	0.228	1.546	1.535	1.545
hsa00410 beta-Alanine metabolism	0.819163	1	0.63	P47895	423	1.504	Up	1.81114e-05	K	Aldehyde dehydrogenase family 1 member A3 OS=Homo sapiens OX=9606 GN=ALDH1A3 PE=1 SV=2	ALDH1A3	1	3.01099e-05	135.99	FK(1)SIEEVIK	2	-0.13248	1	0.763	0.772	0.78	1.196	1.14	1.145
hsa05169 Epstein-Barr virus infection	0.662937	4	0.91	P62333	206	2.136	Up	0.00048094	K	26S proteasome regulatory subunit 10B OS=Homo sapiens OX=9606 GN=PSMC6 PE=1 SV=1	PSMC6	1	0.000150997	83.37	VVSSSIVDK(1)YIGESAR	3	-0.50553	1	0.626	0.649	0.518	1.227	1.325	1.278
hsa05169 Epstein-Barr virus infection	0.662937	4	0.91	P62333	322	1.784	Up	0.040963	K	26S proteasome regulatory subunit 10B OS=Homo sapiens OX=9606 GN=PSMC6 PE=1 SV=1	PSMC6	1	3.68076e-07	92.39	IHAGPITK(1)HGEIDYEAIVK	4	0.89264	1	0.667	0.664	0.727	1.374	1.471	0.826
hsa05169 Epstein-Barr virus infection	0.662937	4	0.91	P30101	494	1.633	Up	0.00061616	K	Protein disulfide-isomerase A3 OS=Homo sapiens OX=9606 GN=PDIA3 PE=1 SV=4	PDIA3	1	1.11552e-22	158.91	EATNPPVIQEEK(1)PK	2	-0.21724	3	0.713	0.703	0.767	1.119	1.287	1.158
hsa05169 Epstein-Barr virus infection	0.662937	4	0.91	P62195	330	2.306	Up	0.0105445	K	26S proteasome regulatory subunit 8 OS=Homo sapiens OX=9606 GN=PSMC5 PE=1 SV=1	PSMC5	1	0.006593	64.82	LDILK(1)IHSR	3	-0.7783	1	0.602	0.591	0.492	0.932	1.66	1.293
hsa05169 Epstein-Barr virus infection	0.662937	4	0.91	Q15008	130	1.786	Up	0.0002359	K	26S proteasome non-ATPase regulatory subunit 6 OS=Homo sapiens OX=9606 GN=PSMD6 PE=1 SV=1	PSMD6	1	0.00511348	57.885	TYDK(1)TVALGHR	3	-1.9991	1	0.682	0.722	0.643	1.2	1.162	1.294
hsa05322 Systemic lupus erythematosus	0.0315099	7	2.2	Q99525	17	1.747	Up	0.020535	K	Histone H4-like protein type G OS=Homo sapiens OX=9606 GN=HIST1H4G PE=1 SV=1	HIST1H4G	1	0.00152844	84.31	GLGK(1)GGAK(1)CHR	3	1.0158	1	0.68	0.775	0.62	1.094	0.996	1.535
hsa05322 Systemic lupus erythematosus	0.0315099	7	2.2	Q96KK5	37	1.556	Up	0.00027896	K	Histone H2A type 1-H OS=Homo sapiens OX=9606 GN=HIST1H2AH PE=1 SV=3	HIST1H2AH	1	0.012122	96.311	K(1)GNYAER	2	0.80708	1	0.728	0.743	0.79	1.238	1.142	1.138
hsa05322 Systemic lupus erythematosus	0.0315099	7	2.2	Q96KK5	96	1.532	Up	0.000135907	K	Histone H2A type 1-H OS=Homo sapiens OX=9606 GN=HIST1H2AH PE=1 SV=3	HIST1H2AH	1	3.40253e-08	141.58	NDEELNK(1)LLGK	2	-0.23047	2	0.728	0.792	0.764	1.153	1.204	1.141
hsa05322 Systemic lupus erythematosus	0.0315099	7	2.2	Q96KK5	126	1.639	Up	7.7928e-05	K	Histone H2A type 1-H OS=Homo sapiens OX=9606 GN=HIST1H2AH PE=1 SV=3	HIST1H2AH	1	0.00072571	91.318	TESHHK(1)AK	3	0.69454	6	0.726	0.693	0.76	1.222	1.176	1.174
hsa05322 Systemic lupus erythematosus	0.0315099	7	2.2	P62805	92	2.182	Up	1.6411e-05	K	Histone H4 OS=Homo sapiens OX=9606 GN=H4C1 PE=1 SV=2	H4C1	1	6.24962e-36	186.16	TVTAMDVVYALK(1)R	2	-0.23684	16	0.562	0.581	0.621	1.289	1.292	1.268
hsa05322 Systemic lupus erythematosus	0.0315099	7	2.2	P62805	32	1.653	Up	0.0134408	K	Histone H4 OS=Homo sapiens OX=9606 GN=H4C1 PE=1 SV=2	H4C1	1	3.04485e-08	128.68	DNIQGITK(1)PAIR	2	0.4573	2	0.677	0.679	0.809	1.203	1.199	1.177
hsa05322 Systemic lupus erythematosus	0.0315099	7	2.2	P62805	80	2.391	Up	2.114e-07	K	Histone H4 OS=Homo sapiens OX=9606 GN=H4C1 PE=1 SV=2	H4C1	1	3.87738e-17	153.23	K(1)TVTAMDVVYALK(1)R	3	-0.75923	21	0.556	0.541	0.548	1.342	1.293	1.298
hsa05322 Systemic lupus erythematosus	0.0315099	7	2.2	P62805	78	1.846	Up	1.73873e-05	K	Histone H4 OS=Homo sapiens OX=9606 GN=H4C1 PE=1 SV=2	H4C1	1	3.72767e-11	151.98	DAVTYTEHAK(1)R	2	0.33428	3	0.693	0.658	0.65	1.26	1.199	1.235
hsa05322 Systemic lupus erythematosus	0.0315099	7	2.2	P62805	17	1.611	Up	2.4396e-05	K	Histone H4 OS=Homo sapiens OX=9606 GN=H4C1 PE=1 SV=2	H4C1	1	1.37446e-45	190.24	GLGK(1)GGAK(1)R	2	-1.3239	136	0.728	0.747	0.73	1.202	1.136	1.215
hsa05322 Systemic lupus erythematosus	0.0315099	7	2.2	Q71DI3	19	1.533	Up	0.034541	K	Histone H3.2 OS=Homo sapiens OX=9606 GN=HIST2H3A PE=1 SV=3	HIST2H3A	1	2.45577e-18	167.09	STGGK(1)APRK(1)QLATK(1)AAR	2	0.22427	41	0.669	0.886	0.726	1.238	0.937	1.322
hsa05322 Systemic lupus erythematosus	0.0315099	7	2.2	Q71DI3	10	1.777	Up	3.3362e-06	K	Histone H3.2 OS=Homo sapiens OX=9606 GN=HIST2H3A PE=1 SV=3	HIST2H3A	1	0.00024356	111.61	QTARK(1)STGGK(1)APR	2	0.94869	19	0.696	0.688	0.673	1.253	1.186	1.216
hsa05322 Systemic lupus erythematosus	0.0315099	7	2.2	P0C0S5	8	2.197	Up	4.9094e-07	K	Histone H2A.Z OS=Homo sapiens OX=9606 GN=H2AZ1 PE=1 SV=2	H2AZ1	1	2.41356e-07	111.64	AGK(1)DSGK(1)AK(1)TK	2	0.79948	12	0.591	0.582	0.583	1.323	1.257	1.278
hsa05322 Systemic lupus erythematosus	0.0315099	7	2.2	P0C0S5	12	2.225	Up	3.9617e-07	K	Histone H2A.Z OS=Homo sapiens OX=9606 GN=H2AZ1 PE=1 SV=2	H2AZ1	1	2.41356e-07	111.64	AGK(1)DSGK(1)AK(1)TK	2	0.79948	10	0.585	0.579	0.575	1.326	1.264	1.279
hsa05322 Systemic lupus erythematosus	0.0315099	7	2.2	P0C0S5	5	1.669	Up	5.8561e-05	K	Histone H2A.Z OS=Homo sapiens OX=9606 GN=H2AZ1 PE=1 SV=2	H2AZ1	1	2.41356e-07	111.64	AGGK(1)AGK(1)DSGK(1)AK(1)TK	2	0.11281	10	0.749	0.714	0.689	1.227	1.164	1.201
hsa05322 Systemic lupus erythematosus	0.0315099	7	2.2	P0C0S5	14	2.729	Up	2.1717e-06	K	Histone H2A.Z OS=Homo sapiens OX=9606 GN=H2AZ1 PE=1 SV=2	H2AZ1	1	2.41356e-07	106.57	AGK(1)DSGK(1)AK(1)TK	2	0.79948	4	0.511	0.491	0.48	1.402	1.295	1.348
hsa05322 Systemic lupus erythematosus	0.0315099	7	2.2	Q71UI9	8	1.776	Up	7.1996e-08	K	Histone H2A.V OS=Homo sapiens OX=9606 GN=H2AFV PE=1 SV=3	H2AFV	1	5.25348e-06	111.64	AGK(1)DSGK(1)AK(1)AK	2	0.56256	10	0.682	0.683	0.692	1.231	1.214	1.209
hsa05322 Systemic lupus erythematosus	0.0315099	7	2.2	Q71UI9	12	1.771	Up	4.7604e-08	K	Histone H2A.V OS=Homo sapiens OX=9606 GN=H2AFV PE=1 SV=3	H2AFV	1	5.25348e-06	111.64	AGK(1)DSGK(1)AK(1)AK	2	0.56256	8	0.684	0.688	0.689	1.228	1.219	1.203
hsa05322 Systemic lupus erythematosus	0.0315099	7	2.2	Q71UI9	14	1.84	Up	6.056e-07	K	Histone H2A.V OS=Homo sapiens OX=9606 GN=H2AFV PE=1 SV=3	H2AFV	1	0.00142022	96.464	AGK(1)DSGK(1)AK(1)AK	2	0.56256	2	0.675	0.674	0.655	1.23	1.211	1.247
hsa05322 Systemic lupus erythematosus	0.0315099	7	2.2	O43707	779	1.506	Up	4.621e-06	K	Alpha-actinin-4 OS=Homo sapiens OX=9606 GN=ACTN4 PE=1 SV=2	ACTN4	1	2.1119e-07	92.098	ASFNHFDK(1)DHGGALGPEEFK	4	-0.48137	1	0.769	0.755	0.788	1.156	1.148	1.177
hsa00400 Phenylalanine, tyrosine and tryptophan biosynthesis	0.230306	1	4.08	P17174	97	1.571	Up	0.0062823	K	Aspartate aminotransferase, cytoplasmic OS=Homo sapiens OX=9606 GN=GOT1 PE=1 SV=3	GOT1	1	0.000526115	69.03	LALGDDSPALK(1)EK	3	4.0464	1	0.768	0.717	0.76	1.092	1.374	1.06
hsa01040 Biosynthesis of unsaturated fatty acids	0.6008	1	1.16	P51659	644	1.711	Up	3.2606e-06	K	Peroxisomal multifunctional enzyme type 2 OS=Homo sapiens OX=9606 GN=HSD17B4 PE=1 SV=3	HSD17B4	1	0.00199147	78.488	DIGPEVVK(1)K	3	-0.57914	2	0.692	0.726	0.695	1.207	1.187	1.221
hsa05323 Rheumatoid arthritis	0.544675	1	1.36	P15692	149	1.52	Up	0.0183197	K	Vascular endothelial growth factor A OS=Homo sapiens OX=9606 GN=VEGFA PE=1 SV=2	VEGFA	1	0.0158118	68.016	GK(1)GK(1)GQK(1)R	3	0.20842	1	0.619	0.836	0.835	1.054	1.197	1.23
hsa05323 Rheumatoid arthritis	0.544675	1	1.36	P15692	147	1.52	Up	0.0183197	K	Vascular endothelial growth factor A OS=Homo sapiens OX=9606 GN=VEGFA PE=1 SV=2	VEGFA	1	0.0158118	68.016	GK(1)GK(1)GQK(1)R	3	0.20842	1	0.619	0.836	0.835	1.054	1.197	1.23
hsa05323 Rheumatoid arthritis	0.544675	1	1.36	P15692	152	1.52	Up	0.0183197	K	Vascular endothelial growth factor A OS=Homo sapiens OX=9606 GN=VEGFA PE=1 SV=2	VEGFA	1	0.0158118	68.016	GK(1)GK(1)GQK(1)R	3	0.20842	1	0.619	0.836	0.835	1.054	1.197	1.23
hsa04932 Non-alcoholic fatty liver disease (NAFLD)	0.863521	2	0.6	P31040	250	1.834	Up	3.6211e-05	K	Succinate dehydrogenase [ubiquinone] flavoprotein subunit, mitochondrial OS=Homo sapiens OX=9606 GN=SDHA PE=1 SV=2	SDHA	1	4.99908e-10	121.48	AK(1)NTVVATGGYGR	2	-0.32717	1	0.651	0.652	0.705	1.211	1.212	1.26
hsa04932 Non-alcoholic fatty liver disease (NAFLD)	0.863521	2	0.6	P47985	101	1.523	Up	0.031261	K	Cytochrome b-c1 complex subunit Rieske, mitochondrial OS=Homo sapiens OX=9606 GN=UQCRFS1 PE=1 SV=2	UQCRFS1	1	0.00038399	92.99	LEVLDSTK(1)SSR	2	-1.559	1	0.714	0.657	0.922	1.111	1.353	1.029
hsa04640 Hematopoietic cell lineage	0.00564465	4	4.66	P23229	144	3.768	Up	1.57151e-05	K	Integrin alpha-6 OS=Homo sapiens OX=9606 GN=ITGA6 PE=1 SV=5	ITGA6	1	3.1719e-06	130.01	QHVNTK(1)QESR	2	1.0391	2	0.354	0.398	0.382	1.474	1.325	1.474
hsa04640 Hematopoietic cell lineage	0.00564465	4	4.66	P23229	594	2.852	Up	0.0097615	K	Integrin alpha-6 OS=Homo sapiens OX=9606 GN=ITGA6 PE=1 SV=5	ITGA6	1	0.0014851	102.53	YTQELTLK(1)R	2	0.55207	2	0.382	0.524	0.521	1.331	1.345	1.394
hsa04640 Hematopoietic cell lineage	0.00564465	4	4.66	P13987	90	2.086	Up	2.1035e-06	K	CD59 glycoprotein OS=Homo sapiens OX=9606 GN=CD59 PE=1 SV=1	CD59	1	3.9152e-08	141.13	ENELTYYCCK(1)K	2	-0.33008	2	0.61	0.612	0.605	1.303	1.29	1.218
hsa04640 Hematopoietic cell lineage	0.00564465	4	4.66	P13987	66	1.753	Up	0.00061964	K	CD59 glycoprotein OS=Homo sapiens OX=9606 GN=CD59 PE=1 SV=1	CD59	1	4.46545e-17	135.72	CWK(1)FEHCNFNDVTTR	3	-2.6005	1	0.661	0.66	0.756	1.253	1.26	1.128
hsa04640 Hematopoietic cell lineage	0.00564465	4	4.66	P17301	261	4.97	Up	7.7205e-05	K	Integrin alpha-2 OS=Homo sapiens OX=9606 GN=ITGA2 PE=1 SV=1	ITGA2	1	5.75495e-08	138.89	K(1)YAYSAASGGR	2	-0.52946	1	0.253	0.307	0.334	1.631	1.406	1.406
hsa04640 Hematopoietic cell lineage	0.00564465	4	4.66	P08174	161	4.927	Up	1.8954e-06	K	Complement decay-accelerating factor OS=Homo sapiens OX=9606 GN=CD55 PE=1 SV=4	CD55	1	0.000511591	92.611	K(1)SCPNPGEIR	2	-0.92109	3	0.289	0.285	0.326	1.505	1.493	1.436
hsa05219 Bladder cancer	0.207923	2	2.33	P15692	149	1.52	Up	0.0183197	K	Vascular endothelial growth factor A OS=Homo sapiens OX=9606 GN=VEGFA PE=1 SV=2	VEGFA	1	0.0158118	68.016	GK(1)GK(1)GQK(1)R	3	0.20842	1	0.619	0.836	0.835	1.054	1.197	1.23
hsa05219 Bladder cancer	0.207923	2	2.33	P15692	147	1.52	Up	0.0183197	K	Vascular endothelial growth factor A OS=Homo sapiens OX=9606 GN=VEGFA PE=1 SV=2	VEGFA	1	0.0158118	68.016	GK(1)GK(1)GQK(1)R	3	0.20842	1	0.619	0.836	0.835	1.054	1.197	1.23
hsa05219 Bladder cancer	0.207923	2	2.33	P15692	152	1.52	Up	0.0183197	K	Vascular endothelial growth factor A OS=Homo sapiens OX=9606 GN=VEGFA PE=1 SV=2	VEGFA	1	0.0158118	68.016	GK(1)GK(1)GQK(1)R	3	0.20842	1	0.619	0.836	0.835	1.054	1.197	1.23
hsa05219 Bladder cancer	0.207923	2	2.33	P36507	108	1.663	Up	0.0022007	K	Dual specificity mitogen-activated protein kinase kinase 2 OS=Homo sapiens OX=9606 GN=MAP2K2 PE=1 SV=1	MAP2K2	1	4.9811e-05	95.483	LIHLEIK(1)PAIR	3	-0.84799	1	0.79	0.663	0.705	1.236	1.078	1.275
hsa04142 Lysosome	0.93752	1	0.39	P53634	162	3.108	Up	0.00042277	K	Dipeptidyl peptidase 1 OS=Homo sapiens OX=9606 GN=CTSC PE=1 SV=2	CTSC	1	0.0014128	98.156	NSQEK(1)YSNR	2	-0.30772	1	0.369	0.439	0.525	1.453	1.385	1.305
hsa00515 Mannose type O-glycan biosynthesis	0.122625	1	8.15	P15291	348	1.811	Up	0.0005237	K	Beta-1,4-galactosyltransferase 1 OS=Homo sapiens OX=9606 GN=B4GALT1 PE=1 SV=5	B4GALT1	1	0.0295481	72.23	K(1)NEPNPQR	2	0.42742	1	0.751	0.632	0.648	1.279	1.22	1.18
hsa00601 Glycosphingolipid biosynthesis - lacto and neolacto series	0.122625	1	8.15	P15291	348	1.811	Up	0.0005237	K	Beta-1,4-galactosyltransferase 1 OS=Homo sapiens OX=9606 GN=B4GALT1 PE=1 SV=5	B4GALT1	1	0.0295481	72.23	K(1)NEPNPQR	2	0.42742	1	0.751	0.632	0.648	1.279	1.22	1.18
hsa04750 Inflammatory mediator regulation of TRP channels	0.819163	1	0.63	Q13557	268	2.448	Up	0.00064196	K	Calcium/calmodulin-dependent protein kinase type II subunit delta OS=Homo sapiens OX=9606 GN=CAMK2D PE=1 SV=3	CAMK2D	1	9.73432e-06	94.09	ITASEALK(1)HPWICQR	3	-2.1026	1	0.448	0.594	0.572	1.394	1.259	1.298
hsa05220 Chronic myeloid leukemia	0.693261	1	0.91	P36507	108	1.663	Up	0.0022007	K	Dual specificity mitogen-activated protein kinase kinase 2 OS=Homo sapiens OX=9606 GN=MAP2K2 PE=1 SV=1	MAP2K2	1	4.9811e-05	95.483	LIHLEIK(1)PAIR	3	-0.84799	1	0.79	0.663	0.705	1.236	1.078	1.275
hsa04620 Toll-like receptor signaling pathway	0.731169	1	0.82	P36507	108	1.663	Up	0.0022007	K	Dual specificity mitogen-activated protein kinase kinase 2 OS=Homo sapiens OX=9606 GN=MAP2K2 PE=1 SV=1	MAP2K2	1	4.9811e-05	95.483	LIHLEIK(1)PAIR	3	-0.84799	1	0.79	0.663	0.705	1.236	1.078	1.275
hsa00360 Phenylalanine metabolism	0.160958	2	2.72	P17174	97	1.571	Up	0.0062823	K	Aspartate aminotransferase, cytoplasmic OS=Homo sapiens OX=9606 GN=GOT1 PE=1 SV=3	GOT1	1	0.000526115	69.03	LALGDDSPALK(1)EK	3	4.0464	1	0.768	0.717	0.76	1.092	1.374	1.06
hsa00360 Phenylalanine metabolism	0.160958	2	2.72	P47895	423	1.504	Up	1.81114e-05	K	Aldehyde dehydrogenase family 1 member A3 OS=Homo sapiens OX=9606 GN=ALDH1A3 PE=1 SV=2	ALDH1A3	1	3.01099e-05	135.99	FK(1)SIEEVIK	2	-0.13248	1	0.763	0.772	0.78	1.196	1.14	1.145
hsa03040 Spliceosome	0.200946	11	1.32	P07910	176	1.934	Up	2.1133e-05	K	Heterogeneous nuclear ribonucleoproteins C1/C2 OS=Homo sapiens OX=9606 GN=HNRNPC PE=1 SV=4	HNRNPC	1	4.37087e-06	137.4	SGFNSK(1)SGQR	2	0.17987	2	0.61	0.654	0.667	1.26	1.219	1.256
hsa03040 Spliceosome	0.200946	11	1.32	P09651	105	1.515	Up	0.0038216	K	Heterogeneous nuclear ribonucleoprotein A1 OS=Homo sapiens OX=9606 GN=HNRNPA1 PE=1 SV=5	HNRNPA1	1	0.000353752	77.776	EDSQRPGAHLTVK(1)K	3	-0.32852	2	0.768	0.733	0.803	1.186	1.276	1.029
hsa03040 Spliceosome	0.200946	11	1.32	Q15365	31	1.653	Up	0.0098571	K	Poly(rC)-binding protein 1 OS=Homo sapiens OX=9606 GN=PCBP1 PE=1 SV=2	PCBP1	1	0.00209659	91.658	EVGSIIGK(1)K	2	0.74548	2	0.745	0.741	0.679	1.055	1.447	1.076
hsa03040 Spliceosome	0.200946	11	1.32	P26368	462	1.533	Up	0.00065807	K	Splicing factor U2AF 65 kDa subunit OS=Homo sapiens OX=9606 GN=U2AF2 PE=1 SV=4	U2AF2	1	0.000151529	86.944	VVVTK(1)YCDPDSYHR	3	-0.73037	2	0.702	0.77	0.809	1.15	1.143	1.203
hsa03040 Spliceosome	0.200946	11	1.32	P17844	33	1.57	Up	2.1671e-06	K	Probable ATP-dependent RNA helicase DDX5 OS=Homo sapiens OX=9606 GN=DDX5 PE=1 SV=1	DDX5	1	0.0114461	85.533	K(1)FGNPGEK	2	0.64993	1	0.756	0.73	0.76	1.172	1.17	1.184
hsa03040 Spliceosome	0.200946	11	1.32	P17844	45	1.709	Up	0.00047944	K	Probable ATP-dependent RNA helicase DDX5 OS=Homo sapiens OX=9606 GN=DDX5 PE=1 SV=1	DDX5	1	0.0064221	68.657	K(1)WNLDELPK	3	0.20029	1	0.715	0.73	0.671	1.179	1.31	1.127
hsa03040 Spliceosome	0.200946	11	1.32	Q9P013	18	2.182	Up	2.6584e-06	K	Spliceosome-associated protein CWC15 homolog OS=Homo sapiens OX=9606 GN=CWC15 PE=1 SV=2	CWC15	1	2.33308e-06	112.02	GK(1)GEGDLSQLSK	2	0.010781	1	0.596	0.59	0.579	1.331	1.232	1.289
hsa03040 Spliceosome	0.200946	11	1.32	Q15459	754	1.678	Up	0.0092791	K	Splicing factor 3A subunit 1 OS=Homo sapiens OX=9606 GN=SF3A1 PE=1 SV=1	SF3A1	1	0.000115335	90.614	IHEATGMPAGK(1)QK	3	1.5095	1	0.66	0.661	0.823	1.204	1.365	1.029
hsa03040 Spliceosome	0.200946	11	1.32	Q96NC0	55	1.581	Up	0.0039606	K	Zinc finger matrin-type protein 2 OS=Homo sapiens OX=9606 GN=ZMAT2 PE=1 SV=1	ZMAT2	1	0.00903316	77.062	DYK(1)VDLESK	2	1.2036	1	0.711	0.841	0.682	1.157	1.275	1.101
hsa03040 Spliceosome	0.200946	11	1.32	Q7L014	776	2.162	Up	1.93599e-05	K	Probable ATP-dependent RNA helicase DDX46 OS=Homo sapiens OX=9606 GN=DDX46 PE=1 SV=2	DDX46	1	0.0024018	81.92	SSGFSGK(1)GFK	2	-0.073836	1	0.567	0.629	0.581	1.291	1.292	1.258
hsa03040 Spliceosome	0.200946	11	1.32	Q15428	10	1.614	Up	0.0156602	K	Splicing factor 3A subunit 2 OS=Homo sapiens OX=9606 GN=SF3A2 PE=1 SV=2	SF3A2	1	1.3659e-26	154.07	PGGK(1)TGSGGVASSSESNR	2	0.58071	2	0.71	0.876	0.616	1.25	1.04	1.265
hsa03040 Spliceosome	0.200946	11	1.32	Q9Y2W2	13	1.624	Up	2.2721e-05	K	WW domain-binding protein 11 OS=Homo sapiens OX=9606 GN=WBP11 PE=1 SV=1	WBP11	1	0.000655499	89.992	SGK(1)FMNPTDQAR	2	-1.3379	1	0.727	0.724	0.744	1.237	1.168	1.16
hsa04114 Oocyte meiosis	0.877044	2	0.58	Q13557	268	2.448	Up	0.00064196	K	Calcium/calmodulin-dependent protein kinase type II subunit delta OS=Homo sapiens OX=9606 GN=CAMK2D PE=1 SV=3	CAMK2D	1	9.73432e-06	94.09	ITASEALK(1)HPWICQR	3	-2.1026	1	0.448	0.594	0.572	1.394	1.259	1.298
hsa04114 Oocyte meiosis	0.877044	2	0.58	P31946	70	1.526	Up	0.0008628	K	14-3-3 protein beta/alpha OS=Homo sapiens OX=9606 GN=YWHAB PE=1 SV=3	YWHAB	1	1.60397e-05	106.67	VISSIEQK(1)TER	3	-0.051644	2	0.777	0.814	0.701	1.201	1.131	1.165
hsa05211 Renal cell carcinoma	0.122027	4	2.04	P15692	149	1.52	Up	0.0183197	K	Vascular endothelial growth factor A OS=Homo sapiens OX=9606 GN=VEGFA PE=1 SV=2	VEGFA	1	0.0158118	68.016	GK(1)GK(1)GQK(1)R	3	0.20842	1	0.619	0.836	0.835	1.054	1.197	1.23
hsa05211 Renal cell carcinoma	0.122027	4	2.04	P15692	147	1.52	Up	0.0183197	K	Vascular endothelial growth factor A OS=Homo sapiens OX=9606 GN=VEGFA PE=1 SV=2	VEGFA	1	0.0158118	68.016	GK(1)GK(1)GQK(1)R	3	0.20842	1	0.619	0.836	0.835	1.054	1.197	1.23
hsa05211 Renal cell carcinoma	0.122027	4	2.04	P15692	152	1.52	Up	0.0183197	K	Vascular endothelial growth factor A OS=Homo sapiens OX=9606 GN=VEGFA PE=1 SV=2	VEGFA	1	0.0158118	68.016	GK(1)GK(1)GQK(1)R	3	0.20842	1	0.619	0.836	0.835	1.054	1.197	1.23
hsa05211 Renal cell carcinoma	0.122027	4	2.04	Q09472	1769	4.035	Up	2.2499e-07	K	Histone acetyltransferase p300 OS=Homo sapiens OX=9606 GN=EP300 PE=1 SV=2	EP300	1	1.89332e-49	208.56	VVQHTK(1)GCK(1)R	2	0.47995	5	0.357	0.351	0.363	1.501	1.405	1.415
hsa05211 Renal cell carcinoma	0.122027	4	2.04	Q09472	1772	11.928	Up	3.2215e-07	K	Histone acetyltransferase p300 OS=Homo sapiens OX=9606 GN=EP300 PE=1 SV=2	EP300	1	1.89332e-49	208.56	VVQHTK(1)GCK(1)R	2	0.47995	3	0.123	0.136	0.141	1.65	1.565	1.556
hsa05211 Renal cell carcinoma	0.122027	4	2.04	Q09472	1762	7.585	Up	0.00119748	K	Histone acetyltransferase p300 OS=Homo sapiens OX=9606 GN=EP300 PE=1 SV=2	EP300	1	2.32223e-16	145.52	NANCSLPSCQK(1)MK(1)R	2	-1.3586	2	0.201	0.229	0.18	1.533	1.572	1.522
hsa05211 Renal cell carcinoma	0.122027	4	2.04	Q09472	1774	3.958	Up	0.0092049	K	Histone acetyltransferase p300 OS=Homo sapiens OX=9606 GN=EP300 PE=1 SV=2	EP300	1	0.000167046	115.33	K(1)TNGGCPICK	3	-1.4801	4	0.287	0.344	0.456	1.437	1.433	1.432
hsa05211 Renal cell carcinoma	0.122027	4	2.04	Q09472	1704	1.891	Up	5.0177e-07	K	Histone acetyltransferase p300 OS=Homo sapiens OX=9606 GN=EP300 PE=1 SV=2	EP300	1	2.47609e-10	80.688	NHDHK(1)MEK(1)LGLGLDDESNNQQAAATQSPGDSR	4	4.3749	6	0.642	0.664	0.659	1.234	1.257	1.224
hsa05211 Renal cell carcinoma	0.122027	4	2.04	Q09472	1760	1.885	Up	3.5127e-06	K	Histone acetyltransferase p300 OS=Homo sapiens OX=9606 GN=EP300 PE=1 SV=2	EP300	1	2.32223e-16	145.52	NANCSLPSCQK(1)MK(1)R	2	-1.3586	5	0.642	0.648	0.679	1.223	1.266	1.222
hsa05211 Renal cell carcinoma	0.122027	4	2.04	P36507	108	1.663	Up	0.0022007	K	Dual specificity mitogen-activated protein kinase kinase 2 OS=Homo sapiens OX=9606 GN=MAP2K2 PE=1 SV=1	MAP2K2	1	4.9811e-05	95.483	LIHLEIK(1)PAIR	3	-0.84799	1	0.79	0.663	0.705	1.236	1.078	1.275
hsa05211 Renal cell carcinoma	0.122027	4	2.04	Q92793	1811	7.596	Up	0.00094031	K	CREB-binding protein OS=Homo sapiens OX=9606 GN=CREBBP PE=1 SV=3	CREBBP	1	0.00377762	83.182	K(1)TNGGCPVCK	2	0.18561	1	0.185	0.196	0.228	1.546	1.535	1.545
hsa04962 Vasopressin-regulated water reabsorption	0.793587	1	0.68	P52565	141	1.57	Up	1.6764e-06	K	Rho GDP-dissociation inhibitor 1 OS=Homo sapiens OX=9606 GN=ARHGDIA PE=1 SV=3	ARHGDIA	1	4.39749e-58	222.45	IDK(1)TDYMVGSYGPR	3	-0.56445	5	0.76	0.752	0.735	1.193	1.165	1.169
hsa01523 Antifolate resistance	0.544675	1	1.36	P34897	200	1.553	Up	0.0024569	K	Serine hydroxymethyltransferase, mitochondrial OS=Homo sapiens OX=9606 GN=SHMT2 PE=1 SV=3	SHMT2	1	1.11032e-09	113.54	LNPK(1)TGLIDYNQLALTAR	3	-0.53359	1	0.671	0.753	0.836	1.158	1.146	1.206
hsa00020 Citrate cycle (TCA cycle)	0.952158	1	0.35	P31040	250	1.834	Up	3.6211e-05	K	Succinate dehydrogenase [ubiquinone] flavoprotein subunit, mitochondrial OS=Homo sapiens OX=9606 GN=SDHA PE=1 SV=2	SDHA	1	4.99908e-10	121.48	AK(1)NTVVATGGYGR	2	-0.32717	1	0.651	0.652	0.705	1.211	1.212	1.26
hsa05110 Vibrio cholerae infection	0.819163	1	0.63	P63261	50	2.044	Up	0.00151871	K	Actin, cytoplasmic 2 OS=Homo sapiens OX=9606 GN=ACTG1 PE=1 SV=1	ACTG1	1	1.73645e-08	74.364	HQGVMVGMGQK(1)DSYVGDEAQSK	3	-0.91047	1	0.53	0.605	0.719	1.328	1.267	1.194
hsa04371 Apelin signaling pathway	0.398644	2	1.48	P62753	243	1.631	Up	0.000121433	K	40S ribosomal protein S6 OS=Homo sapiens OX=9606 GN=RPS6 PE=1 SV=1	RPS6	1	1.94239e-06	121.29	ASTSK(1)SESSQK	2	0.72863	2	0.736	0.685	0.766	1.194	1.197	1.175
hsa04371 Apelin signaling pathway	0.398644	2	1.48	P36507	108	1.663	Up	0.0022007	K	Dual specificity mitogen-activated protein kinase kinase 2 OS=Homo sapiens OX=9606 GN=MAP2K2 PE=1 SV=1	MAP2K2	1	4.9811e-05	95.483	LIHLEIK(1)PAIR	3	-0.84799	1	0.79	0.663	0.705	1.236	1.078	1.275
hsa03460 Fanconi anemia pathway	0.324854	1	2.72	P27694	163	2.076	Up	1.81648e-05	K	Replication protein A 70 kDa DNA-binding subunit OS=Homo sapiens OX=9606 GN=RPA1 PE=1 SV=2	RPA1	1	9.99335e-08	143.97	AYGASK(1)TFGK	3	1.1683	2	0.616	0.618	0.6	1.341	1.243	1.224
hsa04310 Wnt signaling pathway	0.0588888	5	2.27	Q09472	1769	4.035	Up	2.2499e-07	K	Histone acetyltransferase p300 OS=Homo sapiens OX=9606 GN=EP300 PE=1 SV=2	EP300	1	1.89332e-49	208.56	VVQHTK(1)GCK(1)R	2	0.47995	5	0.357	0.351	0.363	1.501	1.405	1.415
hsa04310 Wnt signaling pathway	0.0588888	5	2.27	Q09472	1772	11.928	Up	3.2215e-07	K	Histone acetyltransferase p300 OS=Homo sapiens OX=9606 GN=EP300 PE=1 SV=2	EP300	1	1.89332e-49	208.56	VVQHTK(1)GCK(1)R	2	0.47995	3	0.123	0.136	0.141	1.65	1.565	1.556
hsa04310 Wnt signaling pathway	0.0588888	5	2.27	Q09472	1762	7.585	Up	0.00119748	K	Histone acetyltransferase p300 OS=Homo sapiens OX=9606 GN=EP300 PE=1 SV=2	EP300	1	2.32223e-16	145.52	NANCSLPSCQK(1)MK(1)R	2	-1.3586	2	0.201	0.229	0.18	1.533	1.572	1.522
hsa04310 Wnt signaling pathway	0.0588888	5	2.27	Q09472	1774	3.958	Up	0.0092049	K	Histone acetyltransferase p300 OS=Homo sapiens OX=9606 GN=EP300 PE=1 SV=2	EP300	1	0.000167046	115.33	K(1)TNGGCPICK	3	-1.4801	4	0.287	0.344	0.456	1.437	1.433	1.432
hsa04310 Wnt signaling pathway	0.0588888	5	2.27	Q09472	1704	1.891	Up	5.0177e-07	K	Histone acetyltransferase p300 OS=Homo sapiens OX=9606 GN=EP300 PE=1 SV=2	EP300	1	2.47609e-10	80.688	NHDHK(1)MEK(1)LGLGLDDESNNQQAAATQSPGDSR	4	4.3749	6	0.642	0.664	0.659	1.234	1.257	1.224
hsa04310 Wnt signaling pathway	0.0588888	5	2.27	Q09472	1760	1.885	Up	3.5127e-06	K	Histone acetyltransferase p300 OS=Homo sapiens OX=9606 GN=EP300 PE=1 SV=2	EP300	1	2.32223e-16	145.52	NANCSLPSCQK(1)MK(1)R	2	-1.3586	5	0.642	0.648	0.679	1.223	1.266	1.222
hsa04310 Wnt signaling pathway	0.0588888	5	2.27	Q13557	268	2.448	Up	0.00064196	K	Calcium/calmodulin-dependent protein kinase type II subunit delta OS=Homo sapiens OX=9606 GN=CAMK2D PE=1 SV=3	CAMK2D	1	9.73432e-06	94.09	ITASEALK(1)HPWICQR	3	-2.1026	1	0.448	0.594	0.572	1.394	1.259	1.298
hsa04310 Wnt signaling pathway	0.0588888	5	2.27	O75197	526	6.771	Up	0.0093419	K	Low-density lipoprotein receptor-related protein 5 OS=Homo sapiens OX=9606 GN=LRP5 PE=1 SV=2	LRP5	1	0.0142367	76.073	TDK(1)IEVINVDGTK	2	2.3659	1	0.196	0.27	0.207	1.517	0.67	2.37
hsa04310 Wnt signaling pathway	0.0588888	5	2.27	O75487	44	1.652	Up	4.6607e-06	K	Glypican-4 OS=Homo sapiens OX=9606 GN=GPC4 PE=1 SV=4	GPC4	1	1.65724e-10	118.72	GFNK(1)NDAPLHEINGDHLK	4	0.22408	2	0.727	0.708	0.733	1.228	1.179	1.174
hsa04310 Wnt signaling pathway	0.0588888	5	2.27	Q92793	1811	7.596	Up	0.00094031	K	CREB-binding protein OS=Homo sapiens OX=9606 GN=CREBBP PE=1 SV=3	CREBBP	1	0.00377762	83.182	K(1)TNGGCPVCK	2	0.18561	1	0.185	0.196	0.228	1.546	1.535	1.545
hsa00620 Pyruvate metabolism	0.952158	1	0.35	P00338	222	1.546	Up	0.0049956	K	L-lactate dehydrogenase A chain OS=Homo sapiens OX=9606 GN=LDHA PE=1 SV=2	LDHA	1	0.000110087	92.295	TLHPDLGTDK(1)DK	3	0.56364	1	0.676	0.813	0.781	1.204	1.256	1.05
hsa05225 Hepatocellular carcinoma	0.485905	3	1.16	P36507	108	1.663	Up	0.0022007	K	Dual specificity mitogen-activated protein kinase kinase 2 OS=Homo sapiens OX=9606 GN=MAP2K2 PE=1 SV=1	MAP2K2	1	4.9811e-05	95.483	LIHLEIK(1)PAIR	3	-0.84799	1	0.79	0.663	0.705	1.236	1.078	1.275
hsa05225 Hepatocellular carcinoma	0.485905	3	1.16	O75197	526	6.771	Up	0.0093419	K	Low-density lipoprotein receptor-related protein 5 OS=Homo sapiens OX=9606 GN=LRP5 PE=1 SV=2	LRP5	1	0.0142367	76.073	TDK(1)IEVINVDGTK	2	2.3659	1	0.196	0.27	0.207	1.517	0.67	2.37
hsa05225 Hepatocellular carcinoma	0.485905	3	1.16	P63261	50	2.044	Up	0.00151871	K	Actin, cytoplasmic 2 OS=Homo sapiens OX=9606 GN=ACTG1 PE=1 SV=1	ACTG1	1	1.73645e-08	74.364	HQGVMVGMGQK(1)DSYVGDEAQSK	3	-0.91047	1	0.53	0.605	0.719	1.328	1.267	1.194
hsa04660 T cell receptor signaling pathway	0.793587	1	0.68	P36507	108	1.663	Up	0.0022007	K	Dual specificity mitogen-activated protein kinase kinase 2 OS=Homo sapiens OX=9606 GN=MAP2K2 PE=1 SV=1	MAP2K2	1	4.9811e-05	95.483	LIHLEIK(1)PAIR	3	-0.84799	1	0.79	0.663	0.705	1.236	1.078	1.275
hsa05215 Prostate cancer	0.0812952	4	2.33	Q09472	1769	4.035	Up	2.2499e-07	K	Histone acetyltransferase p300 OS=Homo sapiens OX=9606 GN=EP300 PE=1 SV=2	EP300	1	1.89332e-49	208.56	VVQHTK(1)GCK(1)R	2	0.47995	5	0.357	0.351	0.363	1.501	1.405	1.415
hsa05215 Prostate cancer	0.0812952	4	2.33	Q09472	1772	11.928	Up	3.2215e-07	K	Histone acetyltransferase p300 OS=Homo sapiens OX=9606 GN=EP300 PE=1 SV=2	EP300	1	1.89332e-49	208.56	VVQHTK(1)GCK(1)R	2	0.47995	3	0.123	0.136	0.141	1.65	1.565	1.556
hsa05215 Prostate cancer	0.0812952	4	2.33	Q09472	1762	7.585	Up	0.00119748	K	Histone acetyltransferase p300 OS=Homo sapiens OX=9606 GN=EP300 PE=1 SV=2	EP300	1	2.32223e-16	145.52	NANCSLPSCQK(1)MK(1)R	2	-1.3586	2	0.201	0.229	0.18	1.533	1.572	1.522
hsa05215 Prostate cancer	0.0812952	4	2.33	Q09472	1774	3.958	Up	0.0092049	K	Histone acetyltransferase p300 OS=Homo sapiens OX=9606 GN=EP300 PE=1 SV=2	EP300	1	0.000167046	115.33	K(1)TNGGCPICK	3	-1.4801	4	0.287	0.344	0.456	1.437	1.433	1.432
hsa05215 Prostate cancer	0.0812952	4	2.33	Q09472	1704	1.891	Up	5.0177e-07	K	Histone acetyltransferase p300 OS=Homo sapiens OX=9606 GN=EP300 PE=1 SV=2	EP300	1	2.47609e-10	80.688	NHDHK(1)MEK(1)LGLGLDDESNNQQAAATQSPGDSR	4	4.3749	6	0.642	0.664	0.659	1.234	1.257	1.224
hsa05215 Prostate cancer	0.0812952	4	2.33	Q09472	1760	1.885	Up	3.5127e-06	K	Histone acetyltransferase p300 OS=Homo sapiens OX=9606 GN=EP300 PE=1 SV=2	EP300	1	2.32223e-16	145.52	NANCSLPSCQK(1)MK(1)R	2	-1.3586	5	0.642	0.648	0.679	1.223	1.266	1.222
hsa05215 Prostate cancer	0.0812952	4	2.33	P36507	108	1.663	Up	0.0022007	K	Dual specificity mitogen-activated protein kinase kinase 2 OS=Homo sapiens OX=9606 GN=MAP2K2 PE=1 SV=1	MAP2K2	1	4.9811e-05	95.483	LIHLEIK(1)PAIR	3	-0.84799	1	0.79	0.663	0.705	1.236	1.078	1.275
hsa05215 Prostate cancer	0.0812952	4	2.33	P14625	467	2.375	Up	0.00132479	K	Endoplasmin OS=Homo sapiens OX=9606 GN=HSP90B1 PE=1 SV=1	HSP90B1	1	0.0260932	82.287	K(1)TLDMIK	2	-1.9897	1	0.517	0.571	0.564	1.316	1.312	1.296
hsa05215 Prostate cancer	0.0812952	4	2.33	P14625	473	1.531	Up	0.0021359	K	Endoplasmin OS=Homo sapiens OX=9606 GN=HSP90B1 PE=1 SV=1	HSP90B1	1	0.0291692	80.438	TLDMIK(1)K	3	-0.98878	2	0.833	0.741	0.715	1.239	1.084	1.181
hsa05215 Prostate cancer	0.0812952	4	2.33	Q92793	1811	7.596	Up	0.00094031	K	CREB-binding protein OS=Homo sapiens OX=9606 GN=CREBBP PE=1 SV=3	CREBBP	1	0.00377762	83.182	K(1)TNGGCPVCK	2	0.18561	1	0.185	0.196	0.228	1.546	1.535	1.545
hsa04724 Glutamatergic synapse	0.650049	1	1.02	Q9UPX8	1174	1.904	Up	0.00047943	K	SH3 and multiple ankyrin repeat domains protein 2 OS=Homo sapiens OX=9606 GN=SHANK2 PE=1 SV=3	SHANK2	1	0.0255254	57.281	MK(1)PIIHK	3	-3.76	1	0.718	0.65	0.589	1.296	1.239	1.192
hsa05146 Amoebiasis	0.241	3	1.75	P24043	3092	1.918	Up	1.50302e-05	K	Laminin subunit alpha-2 OS=Homo sapiens OX=9606 GN=LAMA2 PE=1 SV=4	LAMA2	1	0.0350388	67.385	GCIRSLK(1)LTK	2	3.4243	1	0.661	0.626	0.658	1.283	1.221	1.227
hsa05146 Amoebiasis	0.241	3	1.75	Q16787	2135	1.622	Up	3.461e-06	K	Laminin subunit alpha-3 OS=Homo sapiens OX=9606 GN=LAMA3 PE=1 SV=2	LAMA3	1	0.000133898	89.507	SAGK(1)TSLVEEAEK	2	-0.15811	2	0.721	0.727	0.746	1.166	1.178	1.214
hsa05146 Amoebiasis	0.241	3	1.75	O43707	779	1.506	Up	4.621e-06	K	Alpha-actinin-4 OS=Homo sapiens OX=9606 GN=ACTN4 PE=1 SV=2	ACTN4	1	2.1119e-07	92.098	ASFNHFDK(1)DHGGALGPEEFK	4	-0.48137	1	0.769	0.755	0.788	1.156	1.148	1.177
hsa05016 Huntington disease	0.650183	6	0.92	Q09472	1769	4.035	Up	2.2499e-07	K	Histone acetyltransferase p300 OS=Homo sapiens OX=9606 GN=EP300 PE=1 SV=2	EP300	1	1.89332e-49	208.56	VVQHTK(1)GCK(1)R	2	0.47995	5	0.357	0.351	0.363	1.501	1.405	1.415
hsa05016 Huntington disease	0.650183	6	0.92	Q09472	1772	11.928	Up	3.2215e-07	K	Histone acetyltransferase p300 OS=Homo sapiens OX=9606 GN=EP300 PE=1 SV=2	EP300	1	1.89332e-49	208.56	VVQHTK(1)GCK(1)R	2	0.47995	3	0.123	0.136	0.141	1.65	1.565	1.556
hsa05016 Huntington disease	0.650183	6	0.92	Q09472	1762	7.585	Up	0.00119748	K	Histone acetyltransferase p300 OS=Homo sapiens OX=9606 GN=EP300 PE=1 SV=2	EP300	1	2.32223e-16	145.52	NANCSLPSCQK(1)MK(1)R	2	-1.3586	2	0.201	0.229	0.18	1.533	1.572	1.522
hsa05016 Huntington disease	0.650183	6	0.92	Q09472	1774	3.958	Up	0.0092049	K	Histone acetyltransferase p300 OS=Homo sapiens OX=9606 GN=EP300 PE=1 SV=2	EP300	1	0.000167046	115.33	K(1)TNGGCPICK	3	-1.4801	4	0.287	0.344	0.456	1.437	1.433	1.432
hsa05016 Huntington disease	0.650183	6	0.92	Q09472	1704	1.891	Up	5.0177e-07	K	Histone acetyltransferase p300 OS=Homo sapiens OX=9606 GN=EP300 PE=1 SV=2	EP300	1	2.47609e-10	80.688	NHDHK(1)MEK(1)LGLGLDDESNNQQAAATQSPGDSR	4	4.3749	6	0.642	0.664	0.659	1.234	1.257	1.224
hsa05016 Huntington disease	0.650183	6	0.92	Q09472	1760	1.885	Up	3.5127e-06	K	Histone acetyltransferase p300 OS=Homo sapiens OX=9606 GN=EP300 PE=1 SV=2	EP300	1	2.32223e-16	145.52	NANCSLPSCQK(1)MK(1)R	2	-1.3586	5	0.642	0.648	0.679	1.223	1.266	1.222
hsa05016 Huntington disease	0.650183	6	0.92	P31040	250	1.834	Up	3.6211e-05	K	Succinate dehydrogenase [ubiquinone] flavoprotein subunit, mitochondrial OS=Homo sapiens OX=9606 GN=SDHA PE=1 SV=2	SDHA	1	4.99908e-10	121.48	AK(1)NTVVATGGYGR	2	-0.32717	1	0.651	0.652	0.705	1.211	1.212	1.26
hsa05016 Huntington disease	0.650183	6	0.92	P21796	61	1.877	Up	2.673e-06	K	Voltage-dependent anion-selective channel protein 1 OS=Homo sapiens OX=9606 GN=VDAC1 PE=1 SV=2	VDAC1	1	0.00011548	117.25	VTGSLETK(1)YR	3	1.0352	3	0.663	0.636	0.677	1.244	1.244	1.221
hsa05016 Huntington disease	0.650183	6	0.92	P21796	20	1.506	Up	6.0692e-05	K	Voltage-dependent anion-selective channel protein 1 OS=Homo sapiens OX=9606 GN=VDAC1 PE=1 SV=2	VDAC1	1	5.63016e-11	131.66	DVFTK(1)GYGFGLIK	2	0.76596	2	0.765	0.794	0.754	1.198	1.157	1.128
hsa05016 Huntington disease	0.650183	6	0.92	P48047	90	1.539	Up	3.6942e-05	K	ATP synthase subunit O, mitochondrial OS=Homo sapiens OX=9606 GN=ATP5PO PE=1 SV=1	ATP5PO	1	4.77131e-05	120.87	VK(1)SLNDITAK	3	-0.097512	2	0.786	0.739	0.752	1.171	1.146	1.188
hsa05016 Huntington disease	0.650183	6	0.92	P47985	101	1.523	Up	0.031261	K	Cytochrome b-c1 complex subunit Rieske, mitochondrial OS=Homo sapiens OX=9606 GN=UQCRFS1 PE=1 SV=2	UQCRFS1	1	0.00038399	92.99	LEVLDSTK(1)SSR	2	-1.559	1	0.714	0.657	0.922	1.111	1.353	1.029
hsa05016 Huntington disease	0.650183	6	0.92	Q92793	1811	7.596	Up	0.00094031	K	CREB-binding protein OS=Homo sapiens OX=9606 GN=CREBBP PE=1 SV=3	CREBBP	1	0.00377762	83.182	K(1)TNGGCPVCK	2	0.18561	1	0.185	0.196	0.228	1.546	1.535	1.545
hsa04612 Antigen processing and presentation	0.382822	3	1.36	P27824	87	1.514	Up	0.00095527	K	Calnexin OS=Homo sapiens OX=9606 GN=CANX PE=1 SV=2	CANX	1	0.014782	46.88	GTLSGWILSK(1)AK	3	-0.67335	1	0.807	0.786	0.712	1.226	1.112	1.152
hsa04612 Antigen processing and presentation	0.382822	3	1.36	P30101	494	1.633	Up	0.00061616	K	Protein disulfide-isomerase A3 OS=Homo sapiens OX=9606 GN=PDIA3 PE=1 SV=4	PDIA3	1	1.11552e-22	158.91	EATNPPVIQEEK(1)PK	2	-0.21724	3	0.713	0.703	0.767	1.119	1.287	1.158
hsa04612 Antigen processing and presentation	0.382822	3	1.36	P11021	553	1.584	Up	0.00051646	K	Endoplasmic reticulum chaperone BiP OS=Homo sapiens OX=9606 GN=HSPA5 PE=1 SV=2	HSPA5	1	0.0198462	68.915	FAEEDK(1)K	3	0.25072	1	0.739	0.758	0.737	1.273	1.094	1.171
hsa04612 Antigen processing and presentation	0.382822	3	1.36	P11021	352	1.593	Up	7.6558e-05	K	Endoplasmic reticulum chaperone BiP OS=Homo sapiens OX=9606 GN=HSPA5 PE=1 SV=2	HSPA5	1	0.000769989	104.22	VLEDSDLK(1)K	3	2.7364	2	0.731	0.73	0.76	1.123	1.214	1.2
hsa04130 SNARE interactions in vesicular transport	0.230306	1	4.08	O95249	124	1.633	Up	0.0022039	K	Golgi SNAP receptor complex member 1 OS=Homo sapiens OX=9606 GN=GOSR1 PE=1 SV=1	GOSR1	1	2.93662e-06	104.95	DILQDYTHEFHK(1)TK	4	0.62103	1	0.768	0.648	0.771	1.278	1.109	1.185
hsa04146 Peroxisome	0.928612	1	0.41	P51659	644	1.711	Up	3.2606e-06	K	Peroxisomal multifunctional enzyme type 2 OS=Homo sapiens OX=9606 GN=HSD17B4 PE=1 SV=3	HSD17B4	1	0.00199147	78.488	DIGPEVVK(1)K	3	-0.57914	2	0.692	0.726	0.695	1.207	1.187	1.221
hsa00510 N-Glycan biosynthesis	0.00390764	5	4.08	P04843	187	2.143	Up	1.58621e-05	K	Dolichyl-diphosphooligosaccharide--protein glycosyltransferase subunit 1 OS=Homo sapiens OX=9606 GN=RPN1 PE=1 SV=1	RPN1	1	1.75673e-17	156.17	NVESYTK(1)LGNPTR	2	-0.077266	1	0.57	0.614	0.604	1.244	1.32	1.267
hsa00510 N-Glycan biosynthesis	0.00390764	5	4.08	P04844	442	1.522	Up	0.0020441	K	Dolichyl-diphosphooligosaccharide--protein glycosyltransferase subunit 2 OS=Homo sapiens OX=9606 GN=RPN2 PE=1 SV=3	RPN2	1	9.65183e-11	115.57	LHNQK(1)TGQEVVFVAEPDNK	3	-0.45133	1	0.74	0.848	0.707	1.198	1.112	1.182
hsa00510 N-Glycan biosynthesis	0.00390764	5	4.08	P04844	311	1.701	Up	0.00068179	K	Dolichyl-diphosphooligosaccharide--protein glycosyltransferase subunit 2 OS=Homo sapiens OX=9606 GN=RPN2 PE=1 SV=3	RPN2	1	3.52812e-05	124.06	LEHAK(1)SVASR	2	-0.83563	2	0.647	0.769	0.706	1.219	1.246	1.144
hsa00510 N-Glycan biosynthesis	0.00390764	5	4.08	P15291	348	1.811	Up	0.0005237	K	Beta-1,4-galactosyltransferase 1 OS=Homo sapiens OX=9606 GN=B4GALT1 PE=1 SV=5	B4GALT1	1	0.0295481	72.23	K(1)NEPNPQR	2	0.42742	1	0.751	0.632	0.648	1.279	1.22	1.18
hsa00510 N-Glycan biosynthesis	0.00390764	5	4.08	P46977	440	1.518	Up	0.00032166	K	Dolichyl-diphosphooligosaccharide--protein glycosyltransferase subunit STT3A OS=Homo sapiens OX=9606 GN=STT3A PE=1 SV=2	STT3A	1	0.00938561	58.274	NLDISRPDK(1)K	3	-0.18069	1	0.801	0.738	0.761	1.186	1.102	1.203
hsa00510 N-Glycan biosynthesis	0.00390764	5	4.08	Q8TCJ2	688	1.573	Up	0.00030171	K	Dolichyl-diphosphooligosaccharide--protein glycosyltransferase subunit STT3B OS=Homo sapiens OX=9606 GN=STT3B PE=1 SV=1	STT3B	1	0.000563873	81.625	IAEGEHPK(1)DIR	3	1.1943	1	0.753	0.725	0.767	1.259	1.124	1.148
hsa00510 N-Glycan biosynthesis	0.00390764	5	4.08	Q8TCJ2	784	1.902	Up	1.014e-06	K	Dolichyl-diphosphooligosaccharide--protein glycosyltransferase subunit STT3B OS=Homo sapiens OX=9606 GN=STT3B PE=1 SV=1	STT3B	1	0.00186854	91.853	ETLDHK(1)PR	2	2.0478	2	0.65	0.638	0.668	1.235	1.226	1.259
hsa04390 Hippo signaling pathway	0.250865	4	1.55	Q4VCS5	585	2.51	Up	9.7814e-08	K	Angiomotin OS=Homo sapiens OX=9606 GN=AMOT PE=1 SV=1	AMOT	1	0.0447623	40.941	DQALSNAQAK(1)VVK	2	0.43599	1	0.537	0.526	0.519	1.311	1.317	1.343
hsa04390 Hippo signaling pathway	0.250865	4	1.55	P63261	50	2.044	Up	0.00151871	K	Actin, cytoplasmic 2 OS=Homo sapiens OX=9606 GN=ACTG1 PE=1 SV=1	ACTG1	1	1.73645e-08	74.364	HQGVMVGMGQK(1)DSYVGDEAQSK	3	-0.91047	1	0.53	0.605	0.719	1.328	1.267	1.194
hsa04390 Hippo signaling pathway	0.250865	4	1.55	P31946	70	1.526	Up	0.0008628	K	14-3-3 protein beta/alpha OS=Homo sapiens OX=9606 GN=YWHAB PE=1 SV=3	YWHAB	1	1.60397e-05	106.67	VISSIEQK(1)TER	3	-0.051644	2	0.777	0.814	0.701	1.201	1.131	1.165
hsa04390 Hippo signaling pathway	0.250865	4	1.55	P35221	881	1.511	Up	0.00040268	K	Catenin alpha-1 OS=Homo sapiens OX=9606 GN=CTNNA1 PE=1 SV=1	CTNNA1	1	0.00164808	73.927	EKQDETQTK(1)IK	3	0.98541	1	0.774	0.811	0.723	1.193	1.172	1.122
hsa04910 Insulin signaling pathway	0.518479	3	1.11	P62753	243	1.631	Up	0.000121433	K	40S ribosomal protein S6 OS=Homo sapiens OX=9606 GN=RPS6 PE=1 SV=1	RPS6	1	1.94239e-06	121.29	ASTSK(1)SESSQK	2	0.72863	2	0.736	0.685	0.766	1.194	1.197	1.175
hsa04910 Insulin signaling pathway	0.518479	3	1.11	P36507	108	1.663	Up	0.0022007	K	Dual specificity mitogen-activated protein kinase kinase 2 OS=Homo sapiens OX=9606 GN=MAP2K2 PE=1 SV=1	MAP2K2	1	4.9811e-05	95.483	LIHLEIK(1)PAIR	3	-0.84799	1	0.79	0.663	0.705	1.236	1.078	1.275
hsa04910 Insulin signaling pathway	0.518479	3	1.11	Q15382	97	1.749	Up	0.000122954	K	GTP-binding protein Rheb OS=Homo sapiens OX=9606 GN=RHEB PE=1 SV=1	RHEB	1	0.0026732	65.842	SFEVIK(1)VIHGK	3	1.1424	1	0.669	0.666	0.743	1.19	1.244	1.201
hsa04510 Focal adhesion	0.0011585	12	2.58	P15692	149	1.52	Up	0.0183197	K	Vascular endothelial growth factor A OS=Homo sapiens OX=9606 GN=VEGFA PE=1 SV=2	VEGFA	1	0.0158118	68.016	GK(1)GK(1)GQK(1)R	3	0.20842	1	0.619	0.836	0.835	1.054	1.197	1.23
hsa04510 Focal adhesion	0.0011585	12	2.58	P15692	147	1.52	Up	0.0183197	K	Vascular endothelial growth factor A OS=Homo sapiens OX=9606 GN=VEGFA PE=1 SV=2	VEGFA	1	0.0158118	68.016	GK(1)GK(1)GQK(1)R	3	0.20842	1	0.619	0.836	0.835	1.054	1.197	1.23
hsa04510 Focal adhesion	0.0011585	12	2.58	P15692	152	1.52	Up	0.0183197	K	Vascular endothelial growth factor A OS=Homo sapiens OX=9606 GN=VEGFA PE=1 SV=2	VEGFA	1	0.0158118	68.016	GK(1)GK(1)GQK(1)R	3	0.20842	1	0.619	0.836	0.835	1.054	1.197	1.23
hsa04510 Focal adhesion	0.0011585	12	2.58	P21333	994	1.525	Up	1.9772e-05	K	Filamin-A OS=Homo sapiens OX=9606 GN=FLNA PE=1 SV=4	FLNA	1	0.00346172	85.813	DQEFTVK(1)SK	3	-0.051795	2	0.786	0.743	0.763	1.155	1.183	1.157
hsa04510 Focal adhesion	0.0011585	12	2.58	P18564	548	1.991	Up	0.0032991	K	Integrin beta-6 OS=Homo sapiens OX=9606 GN=ITGB6 PE=1 SV=2	ITGB6	1	9.92231e-07	77.037	HK(1)GLLCGGNGDCDCGECVCR	3	-0.47256	1	0.5	0.688	0.699	1.2	1.299	1.258
hsa04510 Focal adhesion	0.0011585	12	2.58	P23229	144	3.768	Up	1.57151e-05	K	Integrin alpha-6 OS=Homo sapiens OX=9606 GN=ITGA6 PE=1 SV=5	ITGA6	1	3.1719e-06	130.01	QHVNTK(1)QESR	2	1.0391	2	0.354	0.398	0.382	1.474	1.325	1.474
hsa04510 Focal adhesion	0.0011585	12	2.58	P23229	594	2.852	Up	0.0097615	K	Integrin alpha-6 OS=Homo sapiens OX=9606 GN=ITGA6 PE=1 SV=5	ITGA6	1	0.0014851	102.53	YTQELTLK(1)R	2	0.55207	2	0.382	0.524	0.521	1.331	1.345	1.394
hsa04510 Focal adhesion	0.0011585	12	2.58	Q03135	57	1.523	Up	0.0012176	K	Caveolin-1 OS=Homo sapiens OX=9606 GN=CAV1 PE=1 SV=4	CAV1	1	0.00201216	67.997	DPK(1)HLNDDVVK	3	1.0261	1	0.694	0.781	0.816	1.145	1.139	1.206
hsa04510 Focal adhesion	0.0011585	12	2.58	O43707	779	1.506	Up	4.621e-06	K	Alpha-actinin-4 OS=Homo sapiens OX=9606 GN=ACTN4 PE=1 SV=2	ACTN4	1	2.1119e-07	92.098	ASFNHFDK(1)DHGGALGPEEFK	4	-0.48137	1	0.769	0.755	0.788	1.156	1.148	1.177
hsa04510 Focal adhesion	0.0011585	12	2.58	P63261	50	2.044	Up	0.00151871	K	Actin, cytoplasmic 2 OS=Homo sapiens OX=9606 GN=ACTG1 PE=1 SV=1	ACTG1	1	1.73645e-08	74.364	HQGVMVGMGQK(1)DSYVGDEAQSK	3	-0.91047	1	0.53	0.605	0.719	1.328	1.267	1.194
hsa04510 Focal adhesion	0.0011585	12	2.58	Q14185	641	2.953	Up	0.001995	K	Dedicator of cytokinesis protein 1 OS=Homo sapiens OX=9606 GN=DOCK1 PE=1 SV=2	DOCK1	1	0.0385614	45.28	QLMK(1)VDGGEVVK	2	-2.6314	1	0.509	0.442	0.439	1.378	1.372	1.355
hsa04510 Focal adhesion	0.0011585	12	2.58	P24043	3092	1.918	Up	1.50302e-05	K	Laminin subunit alpha-2 OS=Homo sapiens OX=9606 GN=LAMA2 PE=1 SV=4	LAMA2	1	0.0350388	67.385	GCIRSLK(1)LTK	2	3.4243	1	0.661	0.626	0.658	1.283	1.221	1.227
hsa04510 Focal adhesion	0.0011585	12	2.58	P02458	1444	3.469	Up	1.93387e-05	K	Collagen alpha-1(II) chain OS=Homo sapiens OX=9606 GN=COL2A1 PE=1 SV=3	COL2A1	1	0.014601	68.915	HTGK(1)WGK	3	-0.79413	1	0.434	0.395	0.388	1.483	1.302	1.437
hsa04510 Focal adhesion	0.0011585	12	2.58	Q16787	2135	1.622	Up	3.461e-06	K	Laminin subunit alpha-3 OS=Homo sapiens OX=9606 GN=LAMA3 PE=1 SV=2	LAMA3	1	0.000133898	89.507	SAGK(1)TSLVEEAEK	2	-0.15811	2	0.721	0.727	0.746	1.166	1.178	1.214
hsa04510 Focal adhesion	0.0011585	12	2.58	P17301	261	4.97	Up	7.7205e-05	K	Integrin alpha-2 OS=Homo sapiens OX=9606 GN=ITGA2 PE=1 SV=1	ITGA2	1	5.75495e-08	138.89	K(1)YAYSAASGGR	2	-0.52946	1	0.253	0.307	0.334	1.631	1.406	1.406
hsa04913 Ovarian steroidogenesis	0.407859	1	2.04	P37059	252	1.662	Up	0.0022599	K	Estradiol 17-beta-dehydrogenase 2 OS=Homo sapiens OX=9606 GN=HSD17B2 PE=1 SV=1	HSD17B2	1	0.00141145	97.734	LELSK(1)WGIK	3	0.69419	2	0.719	0.755	0.681	1.184	1.062	1.336
hsa00630 Glyoxylate and dicarboxylate metabolism	0.84159	1	0.58	P34897	200	1.553	Up	0.0024569	K	Serine hydroxymethyltransferase, mitochondrial OS=Homo sapiens OX=9606 GN=SHMT2 PE=1 SV=3	SHMT2	1	1.11032e-09	113.54	LNPK(1)TGLIDYNQLALTAR	3	-0.53359	1	0.671	0.753	0.836	1.158	1.146	1.206
hsa00982 Drug metabolism - cytochrome P450	0.731169	1	0.82	P47895	423	1.504	Up	1.81114e-05	K	Aldehyde dehydrogenase family 1 member A3 OS=Homo sapiens OX=9606 GN=ALDH1A3 PE=1 SV=2	ALDH1A3	1	3.01099e-05	135.99	FK(1)SIEEVIK	2	-0.13248	1	0.763	0.772	0.78	1.196	1.14	1.145
hsa04713 Circadian entrainment	0.650049	1	1.02	Q13557	268	2.448	Up	0.00064196	K	Calcium/calmodulin-dependent protein kinase type II subunit delta OS=Homo sapiens OX=9606 GN=CAMK2D PE=1 SV=3	CAMK2D	1	9.73432e-06	94.09	ITASEALK(1)HPWICQR	3	-2.1026	1	0.448	0.594	0.572	1.394	1.259	1.298
hsa04970 Salivary secretion	0.650049	1	1.02	P04920	893	4.44	Up	4.2628e-05	K	Anion exchange protein 2 OS=Homo sapiens OX=9606 GN=SLC4A2 PE=1 SV=4	SLC4A2	1	2.23352e-06	112.42	SLAGQSGQGK(1)PR	2	-2.3535	1	0.287	0.375	0.323	1.476	1.415	1.482
hsa04110 Cell cycle	0.328606	5	1.32	Q09472	1769	4.035	Up	2.2499e-07	K	Histone acetyltransferase p300 OS=Homo sapiens OX=9606 GN=EP300 PE=1 SV=2	EP300	1	1.89332e-49	208.56	VVQHTK(1)GCK(1)R	2	0.47995	5	0.357	0.351	0.363	1.501	1.405	1.415
hsa04110 Cell cycle	0.328606	5	1.32	Q09472	1772	11.928	Up	3.2215e-07	K	Histone acetyltransferase p300 OS=Homo sapiens OX=9606 GN=EP300 PE=1 SV=2	EP300	1	1.89332e-49	208.56	VVQHTK(1)GCK(1)R	2	0.47995	3	0.123	0.136	0.141	1.65	1.565	1.556
hsa04110 Cell cycle	0.328606	5	1.32	Q09472	1762	7.585	Up	0.00119748	K	Histone acetyltransferase p300 OS=Homo sapiens OX=9606 GN=EP300 PE=1 SV=2	EP300	1	2.32223e-16	145.52	NANCSLPSCQK(1)MK(1)R	2	-1.3586	2	0.201	0.229	0.18	1.533	1.572	1.522
hsa04110 Cell cycle	0.328606	5	1.32	Q09472	1774	3.958	Up	0.0092049	K	Histone acetyltransferase p300 OS=Homo sapiens OX=9606 GN=EP300 PE=1 SV=2	EP300	1	0.000167046	115.33	K(1)TNGGCPICK	3	-1.4801	4	0.287	0.344	0.456	1.437	1.433	1.432
hsa04110 Cell cycle	0.328606	5	1.32	Q09472	1704	1.891	Up	5.0177e-07	K	Histone acetyltransferase p300 OS=Homo sapiens OX=9606 GN=EP300 PE=1 SV=2	EP300	1	2.47609e-10	80.688	NHDHK(1)MEK(1)LGLGLDDESNNQQAAATQSPGDSR	4	4.3749	6	0.642	0.664	0.659	1.234	1.257	1.224
hsa04110 Cell cycle	0.328606	5	1.32	Q09472	1760	1.885	Up	3.5127e-06	K	Histone acetyltransferase p300 OS=Homo sapiens OX=9606 GN=EP300 PE=1 SV=2	EP300	1	2.32223e-16	145.52	NANCSLPSCQK(1)MK(1)R	2	-1.3586	5	0.642	0.648	0.679	1.223	1.266	1.222
hsa04110 Cell cycle	0.328606	5	1.32	Q14566	407	1.656	Up	0.00065503	K	DNA replication licensing factor MCM6 OS=Homo sapiens OX=9606 GN=MCM6 PE=1 SV=1	MCM6	1	0.0114761	46.318	SQFLK(1)HVEEFSPR	3	-1.3201	1	0.727	0.75	0.689	1.303	1.168	1.116
hsa04110 Cell cycle	0.328606	5	1.32	P31946	70	1.526	Up	0.0008628	K	14-3-3 protein beta/alpha OS=Homo sapiens OX=9606 GN=YWHAB PE=1 SV=3	YWHAB	1	1.60397e-05	106.67	VISSIEQK(1)TER	3	-0.051644	2	0.777	0.814	0.701	1.201	1.131	1.165
hsa04110 Cell cycle	0.328606	5	1.32	P78527	3642	1.51	Up	2.3019e-05	K	DNA-dependent protein kinase catalytic subunit OS=Homo sapiens OX=9606 GN=PRKDC PE=1 SV=3	PRKDC	1	0.0283698	49.715	EFDK(1)HFGK	3	0.53551	1	0.784	0.759	0.766	1.191	1.169	1.127
hsa04110 Cell cycle	0.328606	5	1.32	Q92793	1811	7.596	Up	0.00094031	K	CREB-binding protein OS=Homo sapiens OX=9606 GN=CREBBP PE=1 SV=3	CREBBP	1	0.00377762	83.182	K(1)TNGGCPVCK	2	0.18561	1	0.185	0.196	0.228	1.546	1.535	1.545
hsa05145 Toxoplasmosis	0.311625	3	1.53	P23229	144	3.768	Up	1.57151e-05	K	Integrin alpha-6 OS=Homo sapiens OX=9606 GN=ITGA6 PE=1 SV=5	ITGA6	1	3.1719e-06	130.01	QHVNTK(1)QESR	2	1.0391	2	0.354	0.398	0.382	1.474	1.325	1.474
hsa05145 Toxoplasmosis	0.311625	3	1.53	P23229	594	2.852	Up	0.0097615	K	Integrin alpha-6 OS=Homo sapiens OX=9606 GN=ITGA6 PE=1 SV=5	ITGA6	1	0.0014851	102.53	YTQELTLK(1)R	2	0.55207	2	0.382	0.524	0.521	1.331	1.345	1.394
hsa05145 Toxoplasmosis	0.311625	3	1.53	P24043	3092	1.918	Up	1.50302e-05	K	Laminin subunit alpha-2 OS=Homo sapiens OX=9606 GN=LAMA2 PE=1 SV=4	LAMA2	1	0.0350388	67.385	GCIRSLK(1)LTK	2	3.4243	1	0.661	0.626	0.658	1.283	1.221	1.227
hsa05145 Toxoplasmosis	0.311625	3	1.53	Q16787	2135	1.622	Up	3.461e-06	K	Laminin subunit alpha-3 OS=Homo sapiens OX=9606 GN=LAMA3 PE=1 SV=2	LAMA3	1	0.000133898	89.507	SAGK(1)TSLVEEAEK	2	-0.15811	2	0.721	0.727	0.746	1.166	1.178	1.214
hsa04720 Long-term potentiation	0.0639571	4	2.51	Q09472	1769	4.035	Up	2.2499e-07	K	Histone acetyltransferase p300 OS=Homo sapiens OX=9606 GN=EP300 PE=1 SV=2	EP300	1	1.89332e-49	208.56	VVQHTK(1)GCK(1)R	2	0.47995	5	0.357	0.351	0.363	1.501	1.405	1.415
hsa04720 Long-term potentiation	0.0639571	4	2.51	Q09472	1772	11.928	Up	3.2215e-07	K	Histone acetyltransferase p300 OS=Homo sapiens OX=9606 GN=EP300 PE=1 SV=2	EP300	1	1.89332e-49	208.56	VVQHTK(1)GCK(1)R	2	0.47995	3	0.123	0.136	0.141	1.65	1.565	1.556
hsa04720 Long-term potentiation	0.0639571	4	2.51	Q09472	1762	7.585	Up	0.00119748	K	Histone acetyltransferase p300 OS=Homo sapiens OX=9606 GN=EP300 PE=1 SV=2	EP300	1	2.32223e-16	145.52	NANCSLPSCQK(1)MK(1)R	2	-1.3586	2	0.201	0.229	0.18	1.533	1.572	1.522
hsa04720 Long-term potentiation	0.0639571	4	2.51	Q09472	1774	3.958	Up	0.0092049	K	Histone acetyltransferase p300 OS=Homo sapiens OX=9606 GN=EP300 PE=1 SV=2	EP300	1	0.000167046	115.33	K(1)TNGGCPICK	3	-1.4801	4	0.287	0.344	0.456	1.437	1.433	1.432
hsa04720 Long-term potentiation	0.0639571	4	2.51	Q09472	1704	1.891	Up	5.0177e-07	K	Histone acetyltransferase p300 OS=Homo sapiens OX=9606 GN=EP300 PE=1 SV=2	EP300	1	2.47609e-10	80.688	NHDHK(1)MEK(1)LGLGLDDESNNQQAAATQSPGDSR	4	4.3749	6	0.642	0.664	0.659	1.234	1.257	1.224
hsa04720 Long-term potentiation	0.0639571	4	2.51	Q09472	1760	1.885	Up	3.5127e-06	K	Histone acetyltransferase p300 OS=Homo sapiens OX=9606 GN=EP300 PE=1 SV=2	EP300	1	2.32223e-16	145.52	NANCSLPSCQK(1)MK(1)R	2	-1.3586	5	0.642	0.648	0.679	1.223	1.266	1.222
hsa04720 Long-term potentiation	0.0639571	4	2.51	P36507	108	1.663	Up	0.0022007	K	Dual specificity mitogen-activated protein kinase kinase 2 OS=Homo sapiens OX=9606 GN=MAP2K2 PE=1 SV=1	MAP2K2	1	4.9811e-05	95.483	LIHLEIK(1)PAIR	3	-0.84799	1	0.79	0.663	0.705	1.236	1.078	1.275
hsa04720 Long-term potentiation	0.0639571	4	2.51	Q13557	268	2.448	Up	0.00064196	K	Calcium/calmodulin-dependent protein kinase type II subunit delta OS=Homo sapiens OX=9606 GN=CAMK2D PE=1 SV=3	CAMK2D	1	9.73432e-06	94.09	ITASEALK(1)HPWICQR	3	-2.1026	1	0.448	0.594	0.572	1.394	1.259	1.298
hsa04720 Long-term potentiation	0.0639571	4	2.51	Q92793	1811	7.596	Up	0.00094031	K	CREB-binding protein OS=Homo sapiens OX=9606 GN=CREBBP PE=1 SV=3	CREBBP	1	0.00377762	83.182	K(1)TNGGCPVCK	2	0.18561	1	0.185	0.196	0.228	1.546	1.535	1.545
hsa04630 JAK-STAT signaling pathway	0.398644	2	1.48	Q09472	1769	4.035	Up	2.2499e-07	K	Histone acetyltransferase p300 OS=Homo sapiens OX=9606 GN=EP300 PE=1 SV=2	EP300	1	1.89332e-49	208.56	VVQHTK(1)GCK(1)R	2	0.47995	5	0.357	0.351	0.363	1.501	1.405	1.415
hsa04630 JAK-STAT signaling pathway	0.398644	2	1.48	Q09472	1772	11.928	Up	3.2215e-07	K	Histone acetyltransferase p300 OS=Homo sapiens OX=9606 GN=EP300 PE=1 SV=2	EP300	1	1.89332e-49	208.56	VVQHTK(1)GCK(1)R	2	0.47995	3	0.123	0.136	0.141	1.65	1.565	1.556
hsa04630 JAK-STAT signaling pathway	0.398644	2	1.48	Q09472	1762	7.585	Up	0.00119748	K	Histone acetyltransferase p300 OS=Homo sapiens OX=9606 GN=EP300 PE=1 SV=2	EP300	1	2.32223e-16	145.52	NANCSLPSCQK(1)MK(1)R	2	-1.3586	2	0.201	0.229	0.18	1.533	1.572	1.522
hsa04630 JAK-STAT signaling pathway	0.398644	2	1.48	Q09472	1774	3.958	Up	0.0092049	K	Histone acetyltransferase p300 OS=Homo sapiens OX=9606 GN=EP300 PE=1 SV=2	EP300	1	0.000167046	115.33	K(1)TNGGCPICK	3	-1.4801	4	0.287	0.344	0.456	1.437	1.433	1.432
hsa04630 JAK-STAT signaling pathway	0.398644	2	1.48	Q09472	1704	1.891	Up	5.0177e-07	K	Histone acetyltransferase p300 OS=Homo sapiens OX=9606 GN=EP300 PE=1 SV=2	EP300	1	2.47609e-10	80.688	NHDHK(1)MEK(1)LGLGLDDESNNQQAAATQSPGDSR	4	4.3749	6	0.642	0.664	0.659	1.234	1.257	1.224
hsa04630 JAK-STAT signaling pathway	0.398644	2	1.48	Q09472	1760	1.885	Up	3.5127e-06	K	Histone acetyltransferase p300 OS=Homo sapiens OX=9606 GN=EP300 PE=1 SV=2	EP300	1	2.32223e-16	145.52	NANCSLPSCQK(1)MK(1)R	2	-1.3586	5	0.642	0.648	0.679	1.223	1.266	1.222
hsa04630 JAK-STAT signaling pathway	0.398644	2	1.48	Q92793	1811	7.596	Up	0.00094031	K	CREB-binding protein OS=Homo sapiens OX=9606 GN=CREBBP PE=1 SV=3	CREBBP	1	0.00377762	83.182	K(1)TNGGCPVCK	2	0.18561	1	0.185	0.196	0.228	1.546	1.535	1.545
hsa01522 Endocrine resistance	0.731169	1	0.82	P36507	108	1.663	Up	0.0022007	K	Dual specificity mitogen-activated protein kinase kinase 2 OS=Homo sapiens OX=9606 GN=MAP2K2 PE=1 SV=1	MAP2K2	1	4.9811e-05	95.483	LIHLEIK(1)PAIR	3	-0.84799	1	0.79	0.663	0.705	1.236	1.078	1.275
hsa04062 Chemokine signaling pathway	0.906841	1	0.45	Q13009	564	2.554	Up	2.264e-05	K	T-lymphoma invasion and metastasis-inducing protein 1 OS=Homo sapiens OX=9606 GN=TIAM1 PE=1 SV=2	TIAM1	1	0.00536023	86.794	LLK(1)SEIK	3	-0.69534	1	0.501	0.52	0.54	1.387	1.234	1.366
hsa05134 Legionellosis	0.819163	1	0.63	P55072	651	1.786	Up	0.0026628	K	Transitional endoplasmic reticulum ATPase OS=Homo sapiens OX=9606 GN=VCP PE=1 SV=4	VCP	1	0.0111412	42.095	LDQLIYIPLPDEK(1)SR	3	-0.55872	1	0.764	0.576	0.709	1.167	1.218	1.275
hsa04150 mTOR signaling pathway	0.14076	5	1.77	P08195	266	1.608	Up	0.00037925	K	4F2 cell-surface antigen heavy chain OS=Homo sapiens OX=9606 GN=SLC3A2 PE=1 SV=3	SLC3A2	1	3.45387e-05	99.788	GLVLGPIHK(1)NQK	3	-0.25361	1	0.772	0.719	0.718	1.155	1.268	1.129
hsa04150 mTOR signaling pathway	0.14076	5	1.77	P62753	243	1.631	Up	0.000121433	K	40S ribosomal protein S6 OS=Homo sapiens OX=9606 GN=RPS6 PE=1 SV=1	RPS6	1	1.94239e-06	121.29	ASTSK(1)SESSQK	2	0.72863	2	0.736	0.685	0.766	1.194	1.197	1.175
hsa04150 mTOR signaling pathway	0.14076	5	1.77	P36507	108	1.663	Up	0.0022007	K	Dual specificity mitogen-activated protein kinase kinase 2 OS=Homo sapiens OX=9606 GN=MAP2K2 PE=1 SV=1	MAP2K2	1	4.9811e-05	95.483	LIHLEIK(1)PAIR	3	-0.84799	1	0.79	0.663	0.705	1.236	1.078	1.275
hsa04150 mTOR signaling pathway	0.14076	5	1.77	O75197	526	6.771	Up	0.0093419	K	Low-density lipoprotein receptor-related protein 5 OS=Homo sapiens OX=9606 GN=LRP5 PE=1 SV=2	LRP5	1	0.0142367	76.073	TDK(1)IEVINVDGTK	2	2.3659	1	0.196	0.27	0.207	1.517	0.67	2.37
hsa04150 mTOR signaling pathway	0.14076	5	1.77	Q15382	97	1.749	Up	0.000122954	K	GTP-binding protein Rheb OS=Homo sapiens OX=9606 GN=RHEB PE=1 SV=1	RHEB	1	0.0026732	65.842	SFEVIK(1)VIHGK	3	1.1424	1	0.669	0.666	0.743	1.19	1.244	1.201
hsa05231 Choline metabolism in cancer	0.304359	2	1.81	P36507	108	1.663	Up	0.0022007	K	Dual specificity mitogen-activated protein kinase kinase 2 OS=Homo sapiens OX=9606 GN=MAP2K2 PE=1 SV=1	MAP2K2	1	4.9811e-05	95.483	LIHLEIK(1)PAIR	3	-0.84799	1	0.79	0.663	0.705	1.236	1.078	1.275
hsa05231 Choline metabolism in cancer	0.304359	2	1.81	Q15382	97	1.749	Up	0.000122954	K	GTP-binding protein Rheb OS=Homo sapiens OX=9606 GN=RHEB PE=1 SV=1	RHEB	1	0.0026732	65.842	SFEVIK(1)VIHGK	3	1.1424	1	0.669	0.666	0.743	1.19	1.244	1.201
hsa04979 Cholesterol metabolism	0.304359	2	1.81	P02749	303	21.341	Up	4.0011e-06	K	Beta-2-glycoprotein 1 OS=Homo sapiens OX=9606 GN=APOH PE=1 SV=3	APOH	1	7.12912e-09	145.31	VSFFCK(1)NK(1)EK	2	-0.45882	1	0.064	0.074	0.091	1.696	1.57	1.621
hsa04979 Cholesterol metabolism	0.304359	2	1.81	P02749	301	6.988	Up	4.3035e-08	K	Beta-2-glycoprotein 1 OS=Homo sapiens OX=9606 GN=APOH PE=1 SV=3	APOH	1	7.12912e-09	145.31	VSFFCK(1)NK(1)EK	2	-0.45882	7	0.214	0.222	0.222	1.585	1.496	1.517
hsa04979 Cholesterol metabolism	0.304359	2	1.81	P21796	61	1.877	Up	2.673e-06	K	Voltage-dependent anion-selective channel protein 1 OS=Homo sapiens OX=9606 GN=VDAC1 PE=1 SV=2	VDAC1	1	0.00011548	117.25	VTGSLETK(1)YR	3	1.0352	3	0.663	0.636	0.677	1.244	1.244	1.221
hsa04979 Cholesterol metabolism	0.304359	2	1.81	P21796	20	1.506	Up	6.0692e-05	K	Voltage-dependent anion-selective channel protein 1 OS=Homo sapiens OX=9606 GN=VDAC1 PE=1 SV=2	VDAC1	1	5.63016e-11	131.66	DVFTK(1)GYGFGLIK	2	0.76596	2	0.765	0.794	0.754	1.198	1.157	1.128
hsa04916 Melanogenesis	0.0487925	4	2.72	Q09472	1769	4.035	Up	2.2499e-07	K	Histone acetyltransferase p300 OS=Homo sapiens OX=9606 GN=EP300 PE=1 SV=2	EP300	1	1.89332e-49	208.56	VVQHTK(1)GCK(1)R	2	0.47995	5	0.357	0.351	0.363	1.501	1.405	1.415
hsa04916 Melanogenesis	0.0487925	4	2.72	Q09472	1772	11.928	Up	3.2215e-07	K	Histone acetyltransferase p300 OS=Homo sapiens OX=9606 GN=EP300 PE=1 SV=2	EP300	1	1.89332e-49	208.56	VVQHTK(1)GCK(1)R	2	0.47995	3	0.123	0.136	0.141	1.65	1.565	1.556
hsa04916 Melanogenesis	0.0487925	4	2.72	Q09472	1762	7.585	Up	0.00119748	K	Histone acetyltransferase p300 OS=Homo sapiens OX=9606 GN=EP300 PE=1 SV=2	EP300	1	2.32223e-16	145.52	NANCSLPSCQK(1)MK(1)R	2	-1.3586	2	0.201	0.229	0.18	1.533	1.572	1.522
hsa04916 Melanogenesis	0.0487925	4	2.72	Q09472	1774	3.958	Up	0.0092049	K	Histone acetyltransferase p300 OS=Homo sapiens OX=9606 GN=EP300 PE=1 SV=2	EP300	1	0.000167046	115.33	K(1)TNGGCPICK	3	-1.4801	4	0.287	0.344	0.456	1.437	1.433	1.432
hsa04916 Melanogenesis	0.0487925	4	2.72	Q09472	1704	1.891	Up	5.0177e-07	K	Histone acetyltransferase p300 OS=Homo sapiens OX=9606 GN=EP300 PE=1 SV=2	EP300	1	2.47609e-10	80.688	NHDHK(1)MEK(1)LGLGLDDESNNQQAAATQSPGDSR	4	4.3749	6	0.642	0.664	0.659	1.234	1.257	1.224
hsa04916 Melanogenesis	0.0487925	4	2.72	Q09472	1760	1.885	Up	3.5127e-06	K	Histone acetyltransferase p300 OS=Homo sapiens OX=9606 GN=EP300 PE=1 SV=2	EP300	1	2.32223e-16	145.52	NANCSLPSCQK(1)MK(1)R	2	-1.3586	5	0.642	0.648	0.679	1.223	1.266	1.222
hsa04916 Melanogenesis	0.0487925	4	2.72	P36507	108	1.663	Up	0.0022007	K	Dual specificity mitogen-activated protein kinase kinase 2 OS=Homo sapiens OX=9606 GN=MAP2K2 PE=1 SV=1	MAP2K2	1	4.9811e-05	95.483	LIHLEIK(1)PAIR	3	-0.84799	1	0.79	0.663	0.705	1.236	1.078	1.275
hsa04916 Melanogenesis	0.0487925	4	2.72	Q13557	268	2.448	Up	0.00064196	K	Calcium/calmodulin-dependent protein kinase type II subunit delta OS=Homo sapiens OX=9606 GN=CAMK2D PE=1 SV=3	CAMK2D	1	9.73432e-06	94.09	ITASEALK(1)HPWICQR	3	-2.1026	1	0.448	0.594	0.572	1.394	1.259	1.298
hsa04916 Melanogenesis	0.0487925	4	2.72	Q92793	1811	7.596	Up	0.00094031	K	CREB-binding protein OS=Homo sapiens OX=9606 GN=CREBBP PE=1 SV=3	CREBBP	1	0.00377762	83.182	K(1)TNGGCPVCK	2	0.18561	1	0.185	0.196	0.228	1.546	1.535	1.545
hsa05167 Kaposi sarcoma-associated herpesvirus infection	0.308828	4	1.42	P15692	149	1.52	Up	0.0183197	K	Vascular endothelial growth factor A OS=Homo sapiens OX=9606 GN=VEGFA PE=1 SV=2	VEGFA	1	0.0158118	68.016	GK(1)GK(1)GQK(1)R	3	0.20842	1	0.619	0.836	0.835	1.054	1.197	1.23
hsa05167 Kaposi sarcoma-associated herpesvirus infection	0.308828	4	1.42	P15692	147	1.52	Up	0.0183197	K	Vascular endothelial growth factor A OS=Homo sapiens OX=9606 GN=VEGFA PE=1 SV=2	VEGFA	1	0.0158118	68.016	GK(1)GK(1)GQK(1)R	3	0.20842	1	0.619	0.836	0.835	1.054	1.197	1.23
hsa05167 Kaposi sarcoma-associated herpesvirus infection	0.308828	4	1.42	P15692	152	1.52	Up	0.0183197	K	Vascular endothelial growth factor A OS=Homo sapiens OX=9606 GN=VEGFA PE=1 SV=2	VEGFA	1	0.0158118	68.016	GK(1)GK(1)GQK(1)R	3	0.20842	1	0.619	0.836	0.835	1.054	1.197	1.23
hsa05167 Kaposi sarcoma-associated herpesvirus infection	0.308828	4	1.42	Q09472	1769	4.035	Up	2.2499e-07	K	Histone acetyltransferase p300 OS=Homo sapiens OX=9606 GN=EP300 PE=1 SV=2	EP300	1	1.89332e-49	208.56	VVQHTK(1)GCK(1)R	2	0.47995	5	0.357	0.351	0.363	1.501	1.405	1.415
hsa05167 Kaposi sarcoma-associated herpesvirus infection	0.308828	4	1.42	Q09472	1772	11.928	Up	3.2215e-07	K	Histone acetyltransferase p300 OS=Homo sapiens OX=9606 GN=EP300 PE=1 SV=2	EP300	1	1.89332e-49	208.56	VVQHTK(1)GCK(1)R	2	0.47995	3	0.123	0.136	0.141	1.65	1.565	1.556
hsa05167 Kaposi sarcoma-associated herpesvirus infection	0.308828	4	1.42	Q09472	1762	7.585	Up	0.00119748	K	Histone acetyltransferase p300 OS=Homo sapiens OX=9606 GN=EP300 PE=1 SV=2	EP300	1	2.32223e-16	145.52	NANCSLPSCQK(1)MK(1)R	2	-1.3586	2	0.201	0.229	0.18	1.533	1.572	1.522
hsa05167 Kaposi sarcoma-associated herpesvirus infection	0.308828	4	1.42	Q09472	1774	3.958	Up	0.0092049	K	Histone acetyltransferase p300 OS=Homo sapiens OX=9606 GN=EP300 PE=1 SV=2	EP300	1	0.000167046	115.33	K(1)TNGGCPICK	3	-1.4801	4	0.287	0.344	0.456	1.437	1.433	1.432
hsa05167 Kaposi sarcoma-associated herpesvirus infection	0.308828	4	1.42	Q09472	1704	1.891	Up	5.0177e-07	K	Histone acetyltransferase p300 OS=Homo sapiens OX=9606 GN=EP300 PE=1 SV=2	EP300	1	2.47609e-10	80.688	NHDHK(1)MEK(1)LGLGLDDESNNQQAAATQSPGDSR	4	4.3749	6	0.642	0.664	0.659	1.234	1.257	1.224
hsa05167 Kaposi sarcoma-associated herpesvirus infection	0.308828	4	1.42	Q09472	1760	1.885	Up	3.5127e-06	K	Histone acetyltransferase p300 OS=Homo sapiens OX=9606 GN=EP300 PE=1 SV=2	EP300	1	2.32223e-16	145.52	NANCSLPSCQK(1)MK(1)R	2	-1.3586	5	0.642	0.648	0.679	1.223	1.266	1.222
hsa05167 Kaposi sarcoma-associated herpesvirus infection	0.308828	4	1.42	P36507	108	1.663	Up	0.0022007	K	Dual specificity mitogen-activated protein kinase kinase 2 OS=Homo sapiens OX=9606 GN=MAP2K2 PE=1 SV=1	MAP2K2	1	4.9811e-05	95.483	LIHLEIK(1)PAIR	3	-0.84799	1	0.79	0.663	0.705	1.236	1.078	1.275
hsa05167 Kaposi sarcoma-associated herpesvirus infection	0.308828	4	1.42	Q92793	1811	7.596	Up	0.00094031	K	CREB-binding protein OS=Homo sapiens OX=9606 GN=CREBBP PE=1 SV=3	CREBBP	1	0.00377762	83.182	K(1)TNGGCPVCK	2	0.18561	1	0.185	0.196	0.228	1.546	1.535	1.545
hsa03015 mRNA surveillance pathway	0.987501	1	0.25	Q9HAU5	655	2.502	Up	0.00068041	K	Regulator of nonsense transcripts 2 OS=Homo sapiens OX=9606 GN=UPF2 PE=1 SV=1	UPF2	1	0.0107852	75.819	K(1)DQINIETK	2	0.6534	1	0.517	0.515	0.554	1.314	1.325	1.329
hsa05218 Melanoma	0.544675	1	1.36	P36507	108	1.663	Up	0.0022007	K	Dual specificity mitogen-activated protein kinase kinase 2 OS=Homo sapiens OX=9606 GN=MAP2K2 PE=1 SV=1	MAP2K2	1	4.9811e-05	95.483	LIHLEIK(1)PAIR	3	-0.84799	1	0.79	0.663	0.705	1.236	1.078	1.275
hsa00564 Glycerophospholipid metabolism	0.544675	1	1.36	P43304	634	1.556	Up	0.00122119	K	Glycerol-3-phosphate dehydrogenase, mitochondrial OS=Homo sapiens OX=9606 GN=GPD2 PE=1 SV=3	GPD2	1	0.00240216	76.943	FHK(1)FDADQK	3	1.1569	1	0.676	0.802	0.78	1.142	1.189	1.182
hsa04022 cGMP-PKG signaling pathway	0.750457	2	0.78	P36507	108	1.663	Up	0.0022007	K	Dual specificity mitogen-activated protein kinase kinase 2 OS=Homo sapiens OX=9606 GN=MAP2K2 PE=1 SV=1	MAP2K2	1	4.9811e-05	95.483	LIHLEIK(1)PAIR	3	-0.84799	1	0.79	0.663	0.705	1.236	1.078	1.275
hsa04022 cGMP-PKG signaling pathway	0.750457	2	0.78	P21796	61	1.877	Up	2.673e-06	K	Voltage-dependent anion-selective channel protein 1 OS=Homo sapiens OX=9606 GN=VDAC1 PE=1 SV=2	VDAC1	1	0.00011548	117.25	VTGSLETK(1)YR	3	1.0352	3	0.663	0.636	0.677	1.244	1.244	1.221
hsa04022 cGMP-PKG signaling pathway	0.750457	2	0.78	P21796	20	1.506	Up	6.0692e-05	K	Voltage-dependent anion-selective channel protein 1 OS=Homo sapiens OX=9606 GN=VDAC1 PE=1 SV=2	VDAC1	1	5.63016e-11	131.66	DVFTK(1)GYGFGLIK	2	0.76596	2	0.765	0.794	0.754	1.198	1.157	1.128
hsa04666 Fc gamma R-mediated phagocytosis	0.697968	2	0.86	P23528	92	1.643	Up	3.7006e-05	K	Cofilin-1 OS=Homo sapiens OX=9606 GN=CFL1 PE=1 SV=3	CFL1	1	1.70741e-10	121.99	YALYDATYETK(1)ESK	2	0.88008	2	0.714	0.743	0.716	1.144	1.227	1.2
hsa04666 Fc gamma R-mediated phagocytosis	0.697968	2	0.86	P59998	89	1.616	Up	1.98346e-05	K	Actin-related protein 2/3 complex subunit 4 OS=Homo sapiens OX=9606 GN=ARPC4 PE=1 SV=3	ARPC4	1	0.00095295	104.75	ILCHK(1)FMR	3	-0.82501	1	0.745	0.733	0.723	1.215	1.143	1.199
hsa05160 Hepatitis C	0.832352	2	0.65	P36507	108	1.663	Up	0.0022007	K	Dual specificity mitogen-activated protein kinase kinase 2 OS=Homo sapiens OX=9606 GN=MAP2K2 PE=1 SV=1	MAP2K2	1	4.9811e-05	95.483	LIHLEIK(1)PAIR	3	-0.84799	1	0.79	0.663	0.705	1.236	1.078	1.275
hsa05160 Hepatitis C	0.832352	2	0.65	P31946	70	1.526	Up	0.0008628	K	14-3-3 protein beta/alpha OS=Homo sapiens OX=9606 GN=YWHAB PE=1 SV=3	YWHAB	1	1.60397e-05	106.67	VISSIEQK(1)TER	3	-0.051644	2	0.777	0.814	0.701	1.201	1.131	1.165
hsa00052 Galactose metabolism	0.793587	1	0.68	P15291	348	1.811	Up	0.0005237	K	Beta-1,4-galactosyltransferase 1 OS=Homo sapiens OX=9606 GN=B4GALT1 PE=1 SV=5	B4GALT1	1	0.0295481	72.23	K(1)NEPNPQR	2	0.42742	1	0.751	0.632	0.648	1.279	1.22	1.18
hsa04270 Vascular smooth muscle contraction	0.793587	1	0.68	P36507	108	1.663	Up	0.0022007	K	Dual specificity mitogen-activated protein kinase kinase 2 OS=Homo sapiens OX=9606 GN=MAP2K2 PE=1 SV=1	MAP2K2	1	4.9811e-05	95.483	LIHLEIK(1)PAIR	3	-0.84799	1	0.79	0.663	0.705	1.236	1.078	1.275
hsa01521 EGFR tyrosine kinase inhibitor resistance	0.142562	3	2.22	P15692	149	1.52	Up	0.0183197	K	Vascular endothelial growth factor A OS=Homo sapiens OX=9606 GN=VEGFA PE=1 SV=2	VEGFA	1	0.0158118	68.016	GK(1)GK(1)GQK(1)R	3	0.20842	1	0.619	0.836	0.835	1.054	1.197	1.23
hsa01521 EGFR tyrosine kinase inhibitor resistance	0.142562	3	2.22	P15692	147	1.52	Up	0.0183197	K	Vascular endothelial growth factor A OS=Homo sapiens OX=9606 GN=VEGFA PE=1 SV=2	VEGFA	1	0.0158118	68.016	GK(1)GK(1)GQK(1)R	3	0.20842	1	0.619	0.836	0.835	1.054	1.197	1.23
hsa01521 EGFR tyrosine kinase inhibitor resistance	0.142562	3	2.22	P15692	152	1.52	Up	0.0183197	K	Vascular endothelial growth factor A OS=Homo sapiens OX=9606 GN=VEGFA PE=1 SV=2	VEGFA	1	0.0158118	68.016	GK(1)GK(1)GQK(1)R	3	0.20842	1	0.619	0.836	0.835	1.054	1.197	1.23
hsa01521 EGFR tyrosine kinase inhibitor resistance	0.142562	3	2.22	P62753	243	1.631	Up	0.000121433	K	40S ribosomal protein S6 OS=Homo sapiens OX=9606 GN=RPS6 PE=1 SV=1	RPS6	1	1.94239e-06	121.29	ASTSK(1)SESSQK	2	0.72863	2	0.736	0.685	0.766	1.194	1.197	1.175
hsa01521 EGFR tyrosine kinase inhibitor resistance	0.142562	3	2.22	P36507	108	1.663	Up	0.0022007	K	Dual specificity mitogen-activated protein kinase kinase 2 OS=Homo sapiens OX=9606 GN=MAP2K2 PE=1 SV=1	MAP2K2	1	4.9811e-05	95.483	LIHLEIK(1)PAIR	3	-0.84799	1	0.79	0.663	0.705	1.236	1.078	1.275
hsa05203 Viral carcinogenesis	0.339215	8	1.21	Q09472	1769	4.035	Up	2.2499e-07	K	Histone acetyltransferase p300 OS=Homo sapiens OX=9606 GN=EP300 PE=1 SV=2	EP300	1	1.89332e-49	208.56	VVQHTK(1)GCK(1)R	2	0.47995	5	0.357	0.351	0.363	1.501	1.405	1.415
hsa05203 Viral carcinogenesis	0.339215	8	1.21	Q09472	1772	11.928	Up	3.2215e-07	K	Histone acetyltransferase p300 OS=Homo sapiens OX=9606 GN=EP300 PE=1 SV=2	EP300	1	1.89332e-49	208.56	VVQHTK(1)GCK(1)R	2	0.47995	3	0.123	0.136	0.141	1.65	1.565	1.556
hsa05203 Viral carcinogenesis	0.339215	8	1.21	Q09472	1762	7.585	Up	0.00119748	K	Histone acetyltransferase p300 OS=Homo sapiens OX=9606 GN=EP300 PE=1 SV=2	EP300	1	2.32223e-16	145.52	NANCSLPSCQK(1)MK(1)R	2	-1.3586	2	0.201	0.229	0.18	1.533	1.572	1.522
hsa05203 Viral carcinogenesis	0.339215	8	1.21	Q09472	1774	3.958	Up	0.0092049	K	Histone acetyltransferase p300 OS=Homo sapiens OX=9606 GN=EP300 PE=1 SV=2	EP300	1	0.000167046	115.33	K(1)TNGGCPICK	3	-1.4801	4	0.287	0.344	0.456	1.437	1.433	1.432
hsa05203 Viral carcinogenesis	0.339215	8	1.21	Q09472	1704	1.891	Up	5.0177e-07	K	Histone acetyltransferase p300 OS=Homo sapiens OX=9606 GN=EP300 PE=1 SV=2	EP300	1	2.47609e-10	80.688	NHDHK(1)MEK(1)LGLGLDDESNNQQAAATQSPGDSR	4	4.3749	6	0.642	0.664	0.659	1.234	1.257	1.224
hsa05203 Viral carcinogenesis	0.339215	8	1.21	Q09472	1760	1.885	Up	3.5127e-06	K	Histone acetyltransferase p300 OS=Homo sapiens OX=9606 GN=EP300 PE=1 SV=2	EP300	1	2.32223e-16	145.52	NANCSLPSCQK(1)MK(1)R	2	-1.3586	5	0.642	0.648	0.679	1.223	1.266	1.222
hsa05203 Viral carcinogenesis	0.339215	8	1.21	Q16531	191	1.804	Up	3.8213e-05	K	DNA damage-binding protein 1 OS=Homo sapiens OX=9606 GN=DDB1 PE=1 SV=1	DDB1	1	5.7889e-05	94.363	HVK(1)TYEVSLR	3	-1.2231	2	0.644	0.677	0.712	1.233	1.223	1.211
hsa05203 Viral carcinogenesis	0.339215	8	1.21	P62805	92	2.182	Up	1.6411e-05	K	Histone H4 OS=Homo sapiens OX=9606 GN=H4C1 PE=1 SV=2	H4C1	1	6.24962e-36	186.16	TVTAMDVVYALK(1)R	2	-0.23684	16	0.562	0.581	0.621	1.289	1.292	1.268
hsa05203 Viral carcinogenesis	0.339215	8	1.21	P62805	32	1.653	Up	0.0134408	K	Histone H4 OS=Homo sapiens OX=9606 GN=H4C1 PE=1 SV=2	H4C1	1	3.04485e-08	128.68	DNIQGITK(1)PAIR	2	0.4573	2	0.677	0.679	0.809	1.203	1.199	1.177
hsa05203 Viral carcinogenesis	0.339215	8	1.21	P62805	80	2.391	Up	2.114e-07	K	Histone H4 OS=Homo sapiens OX=9606 GN=H4C1 PE=1 SV=2	H4C1	1	3.87738e-17	153.23	K(1)TVTAMDVVYALK(1)R	3	-0.75923	21	0.556	0.541	0.548	1.342	1.293	1.298
hsa05203 Viral carcinogenesis	0.339215	8	1.21	P62805	78	1.846	Up	1.73873e-05	K	Histone H4 OS=Homo sapiens OX=9606 GN=H4C1 PE=1 SV=2	H4C1	1	3.72767e-11	151.98	DAVTYTEHAK(1)R	2	0.33428	3	0.693	0.658	0.65	1.26	1.199	1.235
hsa05203 Viral carcinogenesis	0.339215	8	1.21	P62805	17	1.611	Up	2.4396e-05	K	Histone H4 OS=Homo sapiens OX=9606 GN=H4C1 PE=1 SV=2	H4C1	1	1.37446e-45	190.24	GLGK(1)GGAK(1)R	2	-1.3239	136	0.728	0.747	0.73	1.202	1.136	1.215
hsa05203 Viral carcinogenesis	0.339215	8	1.21	P31946	70	1.526	Up	0.0008628	K	14-3-3 protein beta/alpha OS=Homo sapiens OX=9606 GN=YWHAB PE=1 SV=3	YWHAB	1	1.60397e-05	106.67	VISSIEQK(1)TER	3	-0.051644	2	0.777	0.814	0.701	1.201	1.131	1.165
hsa05203 Viral carcinogenesis	0.339215	8	1.21	O43707	779	1.506	Up	4.621e-06	K	Alpha-actinin-4 OS=Homo sapiens OX=9606 GN=ACTN4 PE=1 SV=2	ACTN4	1	2.1119e-07	92.098	ASFNHFDK(1)DHGGALGPEEFK	4	-0.48137	1	0.769	0.755	0.788	1.156	1.148	1.177
hsa05203 Viral carcinogenesis	0.339215	8	1.21	Q05086	30	1.55	Up	0.0156587	K	Ubiquitin-protein ligase E3A OS=Homo sapiens OX=9606 GN=UBE3A PE=1 SV=4	UBE3A	1	0.00220051	77.662	AAAK(1)HLIER	3	0.43631	1	0.706	0.91	0.653	1.279	1.144	1.093
hsa05203 Viral carcinogenesis	0.339215	8	1.21	Q99525	17	1.747	Up	0.020535	K	Histone H4-like protein type G OS=Homo sapiens OX=9606 GN=HIST1H4G PE=1 SV=1	HIST1H4G	1	0.00152844	84.31	GLGK(1)GGAK(1)CHR	3	1.0158	1	0.68	0.775	0.62	1.094	0.996	1.535
hsa05203 Viral carcinogenesis	0.339215	8	1.21	Q92793	1811	7.596	Up	0.00094031	K	CREB-binding protein OS=Homo sapiens OX=9606 GN=CREBBP PE=1 SV=3	CREBBP	1	0.00377762	83.182	K(1)TNGGCPVCK	2	0.18561	1	0.185	0.196	0.228	1.546	1.535	1.545
hsa04650 Natural killer cell mediated cytotoxicity	0.731169	1	0.82	P36507	108	1.663	Up	0.0022007	K	Dual specificity mitogen-activated protein kinase kinase 2 OS=Homo sapiens OX=9606 GN=MAP2K2 PE=1 SV=1	MAP2K2	1	4.9811e-05	95.483	LIHLEIK(1)PAIR	3	-0.84799	1	0.79	0.663	0.705	1.236	1.078	1.275
hsa05200 Pathways in cancer	0.0476992	12	1.66	P15692	149	1.52	Up	0.0183197	K	Vascular endothelial growth factor A OS=Homo sapiens OX=9606 GN=VEGFA PE=1 SV=2	VEGFA	1	0.0158118	68.016	GK(1)GK(1)GQK(1)R	3	0.20842	1	0.619	0.836	0.835	1.054	1.197	1.23
hsa05200 Pathways in cancer	0.0476992	12	1.66	P15692	147	1.52	Up	0.0183197	K	Vascular endothelial growth factor A OS=Homo sapiens OX=9606 GN=VEGFA PE=1 SV=2	VEGFA	1	0.0158118	68.016	GK(1)GK(1)GQK(1)R	3	0.20842	1	0.619	0.836	0.835	1.054	1.197	1.23
hsa05200 Pathways in cancer	0.0476992	12	1.66	P15692	152	1.52	Up	0.0183197	K	Vascular endothelial growth factor A OS=Homo sapiens OX=9606 GN=VEGFA PE=1 SV=2	VEGFA	1	0.0158118	68.016	GK(1)GK(1)GQK(1)R	3	0.20842	1	0.619	0.836	0.835	1.054	1.197	1.23
hsa05200 Pathways in cancer	0.0476992	12	1.66	Q09472	1769	4.035	Up	2.2499e-07	K	Histone acetyltransferase p300 OS=Homo sapiens OX=9606 GN=EP300 PE=1 SV=2	EP300	1	1.89332e-49	208.56	VVQHTK(1)GCK(1)R	2	0.47995	5	0.357	0.351	0.363	1.501	1.405	1.415
hsa05200 Pathways in cancer	0.0476992	12	1.66	Q09472	1772	11.928	Up	3.2215e-07	K	Histone acetyltransferase p300 OS=Homo sapiens OX=9606 GN=EP300 PE=1 SV=2	EP300	1	1.89332e-49	208.56	VVQHTK(1)GCK(1)R	2	0.47995	3	0.123	0.136	0.141	1.65	1.565	1.556
hsa05200 Pathways in cancer	0.0476992	12	1.66	Q09472	1762	7.585	Up	0.00119748	K	Histone acetyltransferase p300 OS=Homo sapiens OX=9606 GN=EP300 PE=1 SV=2	EP300	1	2.32223e-16	145.52	NANCSLPSCQK(1)MK(1)R	2	-1.3586	2	0.201	0.229	0.18	1.533	1.572	1.522
hsa05200 Pathways in cancer	0.0476992	12	1.66	Q09472	1774	3.958	Up	0.0092049	K	Histone acetyltransferase p300 OS=Homo sapiens OX=9606 GN=EP300 PE=1 SV=2	EP300	1	0.000167046	115.33	K(1)TNGGCPICK	3	-1.4801	4	0.287	0.344	0.456	1.437	1.433	1.432
hsa05200 Pathways in cancer	0.0476992	12	1.66	Q09472	1704	1.891	Up	5.0177e-07	K	Histone acetyltransferase p300 OS=Homo sapiens OX=9606 GN=EP300 PE=1 SV=2	EP300	1	2.47609e-10	80.688	NHDHK(1)MEK(1)LGLGLDDESNNQQAAATQSPGDSR	4	4.3749	6	0.642	0.664	0.659	1.234	1.257	1.224
hsa05200 Pathways in cancer	0.0476992	12	1.66	Q09472	1760	1.885	Up	3.5127e-06	K	Histone acetyltransferase p300 OS=Homo sapiens OX=9606 GN=EP300 PE=1 SV=2	EP300	1	2.32223e-16	145.52	NANCSLPSCQK(1)MK(1)R	2	-1.3586	5	0.642	0.648	0.679	1.223	1.266	1.222
hsa05200 Pathways in cancer	0.0476992	12	1.66	P36507	108	1.663	Up	0.0022007	K	Dual specificity mitogen-activated protein kinase kinase 2 OS=Homo sapiens OX=9606 GN=MAP2K2 PE=1 SV=1	MAP2K2	1	4.9811e-05	95.483	LIHLEIK(1)PAIR	3	-0.84799	1	0.79	0.663	0.705	1.236	1.078	1.275
hsa05200 Pathways in cancer	0.0476992	12	1.66	P14625	467	2.375	Up	0.00132479	K	Endoplasmin OS=Homo sapiens OX=9606 GN=HSP90B1 PE=1 SV=1	HSP90B1	1	0.0260932	82.287	K(1)TLDMIK	2	-1.9897	1	0.517	0.571	0.564	1.316	1.312	1.296
hsa05200 Pathways in cancer	0.0476992	12	1.66	P14625	473	1.531	Up	0.0021359	K	Endoplasmin OS=Homo sapiens OX=9606 GN=HSP90B1 PE=1 SV=1	HSP90B1	1	0.0291692	80.438	TLDMIK(1)K	3	-0.98878	2	0.833	0.741	0.715	1.239	1.084	1.181
hsa05200 Pathways in cancer	0.0476992	12	1.66	P23229	144	3.768	Up	1.57151e-05	K	Integrin alpha-6 OS=Homo sapiens OX=9606 GN=ITGA6 PE=1 SV=5	ITGA6	1	3.1719e-06	130.01	QHVNTK(1)QESR	2	1.0391	2	0.354	0.398	0.382	1.474	1.325	1.474
hsa05200 Pathways in cancer	0.0476992	12	1.66	P23229	594	2.852	Up	0.0097615	K	Integrin alpha-6 OS=Homo sapiens OX=9606 GN=ITGA6 PE=1 SV=5	ITGA6	1	0.0014851	102.53	YTQELTLK(1)R	2	0.55207	2	0.382	0.524	0.521	1.331	1.345	1.394
hsa05200 Pathways in cancer	0.0476992	12	1.66	Q13557	268	2.448	Up	0.00064196	K	Calcium/calmodulin-dependent protein kinase type II subunit delta OS=Homo sapiens OX=9606 GN=CAMK2D PE=1 SV=3	CAMK2D	1	9.73432e-06	94.09	ITASEALK(1)HPWICQR	3	-2.1026	1	0.448	0.594	0.572	1.394	1.259	1.298
hsa05200 Pathways in cancer	0.0476992	12	1.66	O75197	526	6.771	Up	0.0093419	K	Low-density lipoprotein receptor-related protein 5 OS=Homo sapiens OX=9606 GN=LRP5 PE=1 SV=2	LRP5	1	0.0142367	76.073	TDK(1)IEVINVDGTK	2	2.3659	1	0.196	0.27	0.207	1.517	0.67	2.37
hsa05200 Pathways in cancer	0.0476992	12	1.66	P24043	3092	1.918	Up	1.50302e-05	K	Laminin subunit alpha-2 OS=Homo sapiens OX=9606 GN=LAMA2 PE=1 SV=4	LAMA2	1	0.0350388	67.385	GCIRSLK(1)LTK	2	3.4243	1	0.661	0.626	0.658	1.283	1.221	1.227
hsa05200 Pathways in cancer	0.0476992	12	1.66	P35221	881	1.511	Up	0.00040268	K	Catenin alpha-1 OS=Homo sapiens OX=9606 GN=CTNNA1 PE=1 SV=1	CTNNA1	1	0.00164808	73.927	EKQDETQTK(1)IK	3	0.98541	1	0.774	0.811	0.723	1.193	1.172	1.122
hsa05200 Pathways in cancer	0.0476992	12	1.66	Q92793	1811	7.596	Up	0.00094031	K	CREB-binding protein OS=Homo sapiens OX=9606 GN=CREBBP PE=1 SV=3	CREBBP	1	0.00377762	83.182	K(1)TNGGCPVCK	2	0.18561	1	0.185	0.196	0.228	1.546	1.535	1.545
hsa05200 Pathways in cancer	0.0476992	12	1.66	Q16787	2135	1.622	Up	3.461e-06	K	Laminin subunit alpha-3 OS=Homo sapiens OX=9606 GN=LAMA3 PE=1 SV=2	LAMA3	1	0.000133898	89.507	SAGK(1)TSLVEEAEK	2	-0.15811	2	0.721	0.727	0.746	1.166	1.178	1.214
hsa05200 Pathways in cancer	0.0476992	12	1.66	P17301	261	4.97	Up	7.7205e-05	K	Integrin alpha-2 OS=Homo sapiens OX=9606 GN=ITGA2 PE=1 SV=1	ITGA2	1	5.75495e-08	138.89	K(1)YAYSAASGGR	2	-0.52946	1	0.253	0.307	0.334	1.631	1.406	1.406
hsa03430 Mismatch repair	0.544675	1	1.36	P27694	163	2.076	Up	1.81648e-05	K	Replication protein A 70 kDa DNA-binding subunit OS=Homo sapiens OX=9606 GN=RPA1 PE=1 SV=2	RPA1	1	9.99335e-08	143.97	AYGASK(1)TFGK	3	1.1683	2	0.616	0.618	0.6	1.341	1.243	1.224
hsa04261 Adrenergic signaling in cardiomyocytes	0.918445	1	0.43	Q13557	268	2.448	Up	0.00064196	K	Calcium/calmodulin-dependent protein kinase type II subunit delta OS=Homo sapiens OX=9606 GN=CAMK2D PE=1 SV=3	CAMK2D	1	9.73432e-06	94.09	ITASEALK(1)HPWICQR	3	-2.1026	1	0.448	0.594	0.572	1.394	1.259	1.298
hsa05012 Parkinson disease	0.744239	4	0.82	P31040	250	1.834	Up	3.6211e-05	K	Succinate dehydrogenase [ubiquinone] flavoprotein subunit, mitochondrial OS=Homo sapiens OX=9606 GN=SDHA PE=1 SV=2	SDHA	1	4.99908e-10	121.48	AK(1)NTVVATGGYGR	2	-0.32717	1	0.651	0.652	0.705	1.211	1.212	1.26
hsa05012 Parkinson disease	0.744239	4	0.82	P21796	61	1.877	Up	2.673e-06	K	Voltage-dependent anion-selective channel protein 1 OS=Homo sapiens OX=9606 GN=VDAC1 PE=1 SV=2	VDAC1	1	0.00011548	117.25	VTGSLETK(1)YR	3	1.0352	3	0.663	0.636	0.677	1.244	1.244	1.221
hsa05012 Parkinson disease	0.744239	4	0.82	P21796	20	1.506	Up	6.0692e-05	K	Voltage-dependent anion-selective channel protein 1 OS=Homo sapiens OX=9606 GN=VDAC1 PE=1 SV=2	VDAC1	1	5.63016e-11	131.66	DVFTK(1)GYGFGLIK	2	0.76596	2	0.765	0.794	0.754	1.198	1.157	1.128
hsa05012 Parkinson disease	0.744239	4	0.82	P48047	90	1.539	Up	3.6942e-05	K	ATP synthase subunit O, mitochondrial OS=Homo sapiens OX=9606 GN=ATP5PO PE=1 SV=1	ATP5PO	1	4.77131e-05	120.87	VK(1)SLNDITAK	3	-0.097512	2	0.786	0.739	0.752	1.171	1.146	1.188
hsa05012 Parkinson disease	0.744239	4	0.82	P47985	101	1.523	Up	0.031261	K	Cytochrome b-c1 complex subunit Rieske, mitochondrial OS=Homo sapiens OX=9606 GN=UQCRFS1 PE=1 SV=2	UQCRFS1	1	0.00038399	92.99	LEVLDSTK(1)SSR	2	-1.559	1	0.714	0.657	0.922	1.111	1.353	1.029
hsa04621 NOD-like receptor signaling pathway	0.952158	1	0.35	P21796	61	1.877	Up	2.673e-06	K	Voltage-dependent anion-selective channel protein 1 OS=Homo sapiens OX=9606 GN=VDAC1 PE=1 SV=2	VDAC1	1	0.00011548	117.25	VTGSLETK(1)YR	3	1.0352	3	0.663	0.636	0.677	1.244	1.244	1.221
hsa04621 NOD-like receptor signaling pathway	0.952158	1	0.35	P21796	20	1.506	Up	6.0692e-05	K	Voltage-dependent anion-selective channel protein 1 OS=Homo sapiens OX=9606 GN=VDAC1 PE=1 SV=2	VDAC1	1	5.63016e-11	131.66	DVFTK(1)GYGFGLIK	2	0.76596	2	0.765	0.794	0.754	1.198	1.157	1.128
hsa04211 Longevity regulating pathway	0.650049	1	1.02	Q15382	97	1.749	Up	0.000122954	K	GTP-binding protein Rheb OS=Homo sapiens OX=9606 GN=RHEB PE=1 SV=1	RHEB	1	0.0026732	65.842	SFEVIK(1)VIHGK	3	1.1424	1	0.669	0.666	0.743	1.19	1.244	1.201
hsa04714 Thermogenesis	0.504019	6	1.06	P62753	243	1.631	Up	0.000121433	K	40S ribosomal protein S6 OS=Homo sapiens OX=9606 GN=RPS6 PE=1 SV=1	RPS6	1	1.94239e-06	121.29	ASTSK(1)SESSQK	2	0.72863	2	0.736	0.685	0.766	1.194	1.197	1.175
hsa04714 Thermogenesis	0.504019	6	1.06	P31040	250	1.834	Up	3.6211e-05	K	Succinate dehydrogenase [ubiquinone] flavoprotein subunit, mitochondrial OS=Homo sapiens OX=9606 GN=SDHA PE=1 SV=2	SDHA	1	4.99908e-10	121.48	AK(1)NTVVATGGYGR	2	-0.32717	1	0.651	0.652	0.705	1.211	1.212	1.26
hsa04714 Thermogenesis	0.504019	6	1.06	P48047	90	1.539	Up	3.6942e-05	K	ATP synthase subunit O, mitochondrial OS=Homo sapiens OX=9606 GN=ATP5PO PE=1 SV=1	ATP5PO	1	4.77131e-05	120.87	VK(1)SLNDITAK	3	-0.097512	2	0.786	0.739	0.752	1.171	1.146	1.188
hsa04714 Thermogenesis	0.504019	6	1.06	P47985	101	1.523	Up	0.031261	K	Cytochrome b-c1 complex subunit Rieske, mitochondrial OS=Homo sapiens OX=9606 GN=UQCRFS1 PE=1 SV=2	UQCRFS1	1	0.00038399	92.99	LEVLDSTK(1)SSR	2	-1.559	1	0.714	0.657	0.922	1.111	1.353	1.029
hsa04714 Thermogenesis	0.504019	6	1.06	P63261	50	2.044	Up	0.00151871	K	Actin, cytoplasmic 2 OS=Homo sapiens OX=9606 GN=ACTG1 PE=1 SV=1	ACTG1	1	1.73645e-08	74.364	HQGVMVGMGQK(1)DSYVGDEAQSK	3	-0.91047	1	0.53	0.605	0.719	1.328	1.267	1.194
hsa04714 Thermogenesis	0.504019	6	1.06	Q15382	97	1.749	Up	0.000122954	K	GTP-binding protein Rheb OS=Homo sapiens OX=9606 GN=RHEB PE=1 SV=1	RHEB	1	0.0026732	65.842	SFEVIK(1)VIHGK	3	1.1424	1	0.669	0.666	0.743	1.19	1.244	1.201
hsa00051 Fructose and mannose metabolism	0.731169	1	0.82	P04075	200	1.909	Up	0.00039957	K	Fructose-bisphosphate aldolase A OS=Homo sapiens OX=9606 GN=ALDOA PE=1 SV=2	ALDOA	1	1.06057e-28	125	YASICQQNGIVPIVEPEILPDGDHDLK(1)R	3	-1.6772	8	0.693	0.577	0.681	1.214	1.249	1.262
hsa00051 Fructose and mannose metabolism	0.731169	1	0.82	P04075	108	1.531	Up	0.00098334	K	Fructose-bisphosphate aldolase A OS=Homo sapiens OX=9606 GN=ALDOA PE=1 SV=2	ALDOA	1	0.000445929	92.866	GGVVGIK(1)VDK	2	0.15856	1	0.727	0.722	0.837	1.193	1.157	1.149
hsa05205 Proteoglycans in cancer	0.00507379	11	2.3	P15692	149	1.52	Up	0.0183197	K	Vascular endothelial growth factor A OS=Homo sapiens OX=9606 GN=VEGFA PE=1 SV=2	VEGFA	1	0.0158118	68.016	GK(1)GK(1)GQK(1)R	3	0.20842	1	0.619	0.836	0.835	1.054	1.197	1.23
hsa05205 Proteoglycans in cancer	0.00507379	11	2.3	P15692	147	1.52	Up	0.0183197	K	Vascular endothelial growth factor A OS=Homo sapiens OX=9606 GN=VEGFA PE=1 SV=2	VEGFA	1	0.0158118	68.016	GK(1)GK(1)GQK(1)R	3	0.20842	1	0.619	0.836	0.835	1.054	1.197	1.23
hsa05205 Proteoglycans in cancer	0.00507379	11	2.3	P15692	152	1.52	Up	0.0183197	K	Vascular endothelial growth factor A OS=Homo sapiens OX=9606 GN=VEGFA PE=1 SV=2	VEGFA	1	0.0158118	68.016	GK(1)GK(1)GQK(1)R	3	0.20842	1	0.619	0.836	0.835	1.054	1.197	1.23
hsa05205 Proteoglycans in cancer	0.00507379	11	2.3	P21333	994	1.525	Up	1.9772e-05	K	Filamin-A OS=Homo sapiens OX=9606 GN=FLNA PE=1 SV=4	FLNA	1	0.00346172	85.813	DQEFTVK(1)SK	3	-0.051795	2	0.786	0.743	0.763	1.155	1.183	1.157
hsa05205 Proteoglycans in cancer	0.00507379	11	2.3	P36507	108	1.663	Up	0.0022007	K	Dual specificity mitogen-activated protein kinase kinase 2 OS=Homo sapiens OX=9606 GN=MAP2K2 PE=1 SV=1	MAP2K2	1	4.9811e-05	95.483	LIHLEIK(1)PAIR	3	-0.84799	1	0.79	0.663	0.705	1.236	1.078	1.275
hsa05205 Proteoglycans in cancer	0.00507379	11	2.3	Q13557	268	2.448	Up	0.00064196	K	Calcium/calmodulin-dependent protein kinase type II subunit delta OS=Homo sapiens OX=9606 GN=CAMK2D PE=1 SV=3	CAMK2D	1	9.73432e-06	94.09	ITASEALK(1)HPWICQR	3	-2.1026	1	0.448	0.594	0.572	1.394	1.259	1.298
hsa05205 Proteoglycans in cancer	0.00507379	11	2.3	Q03135	57	1.523	Up	0.0012176	K	Caveolin-1 OS=Homo sapiens OX=9606 GN=CAV1 PE=1 SV=4	CAV1	1	0.00201216	67.997	DPK(1)HLNDDVVK	3	1.0261	1	0.694	0.781	0.816	1.145	1.139	1.206
hsa05205 Proteoglycans in cancer	0.00507379	11	2.3	P17844	33	1.57	Up	2.1671e-06	K	Probable ATP-dependent RNA helicase DDX5 OS=Homo sapiens OX=9606 GN=DDX5 PE=1 SV=1	DDX5	1	0.0114461	85.533	K(1)FGNPGEK	2	0.64993	1	0.756	0.73	0.76	1.172	1.17	1.184
hsa05205 Proteoglycans in cancer	0.00507379	11	2.3	P17844	45	1.709	Up	0.00047944	K	Probable ATP-dependent RNA helicase DDX5 OS=Homo sapiens OX=9606 GN=DDX5 PE=1 SV=1	DDX5	1	0.0064221	68.657	K(1)WNLDELPK	3	0.20029	1	0.715	0.73	0.671	1.179	1.31	1.127
hsa05205 Proteoglycans in cancer	0.00507379	11	2.3	P62753	243	1.631	Up	0.000121433	K	40S ribosomal protein S6 OS=Homo sapiens OX=9606 GN=RPS6 PE=1 SV=1	RPS6	1	1.94239e-06	121.29	ASTSK(1)SESSQK	2	0.72863	2	0.736	0.685	0.766	1.194	1.197	1.175
hsa05205 Proteoglycans in cancer	0.00507379	11	2.3	Q13009	564	2.554	Up	2.264e-05	K	T-lymphoma invasion and metastasis-inducing protein 1 OS=Homo sapiens OX=9606 GN=TIAM1 PE=1 SV=2	TIAM1	1	0.00536023	86.794	LLK(1)SEIK	3	-0.69534	1	0.501	0.52	0.54	1.387	1.234	1.366
hsa05205 Proteoglycans in cancer	0.00507379	11	2.3	P63261	50	2.044	Up	0.00151871	K	Actin, cytoplasmic 2 OS=Homo sapiens OX=9606 GN=ACTG1 PE=1 SV=1	ACTG1	1	1.73645e-08	74.364	HQGVMVGMGQK(1)DSYVGDEAQSK	3	-0.91047	1	0.53	0.605	0.719	1.328	1.267	1.194
hsa05205 Proteoglycans in cancer	0.00507379	11	2.3	Q14247	161	1.788	Up	3.79e-05	K	Src substrate cortactin OS=Homo sapiens OX=9606 GN=CTTN PE=1 SV=2	CTTN	1	5.64477e-17	133.78	DYSSGFGGK(1)YGVQADR	2	0.1629	2	0.677	0.659	0.712	1.252	1.23	1.179
hsa05205 Proteoglycans in cancer	0.00507379	11	2.3	Q14247	198	1.588	Up	0.00024373	K	Src substrate cortactin OS=Homo sapiens OX=9606 GN=CTTN PE=1 SV=2	CTTN	1	6.55628e-07	113.24	GFGGK(1)YGIDK	3	-0.15514	2	0.734	0.77	0.724	1.251	1.119	1.169
hsa05205 Proteoglycans in cancer	0.00507379	11	2.3	P17301	261	4.97	Up	7.7205e-05	K	Integrin alpha-2 OS=Homo sapiens OX=9606 GN=ITGA2 PE=1 SV=1	ITGA2	1	5.75495e-08	138.89	K(1)YAYSAASGGR	2	-0.52946	1	0.253	0.307	0.334	1.631	1.406	1.406
hsa05206 MicroRNAs in cancer	0.338355	4	1.36	P15692	149	1.52	Up	0.0183197	K	Vascular endothelial growth factor A OS=Homo sapiens OX=9606 GN=VEGFA PE=1 SV=2	VEGFA	1	0.0158118	68.016	GK(1)GK(1)GQK(1)R	3	0.20842	1	0.619	0.836	0.835	1.054	1.197	1.23
hsa05206 MicroRNAs in cancer	0.338355	4	1.36	P15692	147	1.52	Up	0.0183197	K	Vascular endothelial growth factor A OS=Homo sapiens OX=9606 GN=VEGFA PE=1 SV=2	VEGFA	1	0.0158118	68.016	GK(1)GK(1)GQK(1)R	3	0.20842	1	0.619	0.836	0.835	1.054	1.197	1.23
hsa05206 MicroRNAs in cancer	0.338355	4	1.36	P15692	152	1.52	Up	0.0183197	K	Vascular endothelial growth factor A OS=Homo sapiens OX=9606 GN=VEGFA PE=1 SV=2	VEGFA	1	0.0158118	68.016	GK(1)GK(1)GQK(1)R	3	0.20842	1	0.619	0.836	0.835	1.054	1.197	1.23
hsa05206 MicroRNAs in cancer	0.338355	4	1.36	Q09472	1769	4.035	Up	2.2499e-07	K	Histone acetyltransferase p300 OS=Homo sapiens OX=9606 GN=EP300 PE=1 SV=2	EP300	1	1.89332e-49	208.56	VVQHTK(1)GCK(1)R	2	0.47995	5	0.357	0.351	0.363	1.501	1.405	1.415
hsa05206 MicroRNAs in cancer	0.338355	4	1.36	Q09472	1772	11.928	Up	3.2215e-07	K	Histone acetyltransferase p300 OS=Homo sapiens OX=9606 GN=EP300 PE=1 SV=2	EP300	1	1.89332e-49	208.56	VVQHTK(1)GCK(1)R	2	0.47995	3	0.123	0.136	0.141	1.65	1.565	1.556
hsa05206 MicroRNAs in cancer	0.338355	4	1.36	Q09472	1762	7.585	Up	0.00119748	K	Histone acetyltransferase p300 OS=Homo sapiens OX=9606 GN=EP300 PE=1 SV=2	EP300	1	2.32223e-16	145.52	NANCSLPSCQK(1)MK(1)R	2	-1.3586	2	0.201	0.229	0.18	1.533	1.572	1.522
hsa05206 MicroRNAs in cancer	0.338355	4	1.36	Q09472	1774	3.958	Up	0.0092049	K	Histone acetyltransferase p300 OS=Homo sapiens OX=9606 GN=EP300 PE=1 SV=2	EP300	1	0.000167046	115.33	K(1)TNGGCPICK	3	-1.4801	4	0.287	0.344	0.456	1.437	1.433	1.432
hsa05206 MicroRNAs in cancer	0.338355	4	1.36	Q09472	1704	1.891	Up	5.0177e-07	K	Histone acetyltransferase p300 OS=Homo sapiens OX=9606 GN=EP300 PE=1 SV=2	EP300	1	2.47609e-10	80.688	NHDHK(1)MEK(1)LGLGLDDESNNQQAAATQSPGDSR	4	4.3749	6	0.642	0.664	0.659	1.234	1.257	1.224
hsa05206 MicroRNAs in cancer	0.338355	4	1.36	Q09472	1760	1.885	Up	3.5127e-06	K	Histone acetyltransferase p300 OS=Homo sapiens OX=9606 GN=EP300 PE=1 SV=2	EP300	1	2.32223e-16	145.52	NANCSLPSCQK(1)MK(1)R	2	-1.3586	5	0.642	0.648	0.679	1.223	1.266	1.222
hsa05206 MicroRNAs in cancer	0.338355	4	1.36	P36507	108	1.663	Up	0.0022007	K	Dual specificity mitogen-activated protein kinase kinase 2 OS=Homo sapiens OX=9606 GN=MAP2K2 PE=1 SV=1	MAP2K2	1	4.9811e-05	95.483	LIHLEIK(1)PAIR	3	-0.84799	1	0.79	0.663	0.705	1.236	1.078	1.275
hsa05206 MicroRNAs in cancer	0.338355	4	1.36	Q92793	1811	7.596	Up	0.00094031	K	CREB-binding protein OS=Homo sapiens OX=9606 GN=CREBBP PE=1 SV=3	CREBBP	1	0.00377762	83.182	K(1)TNGGCPVCK	2	0.18561	1	0.185	0.196	0.228	1.546	1.535	1.545
hsa05226 Gastric cancer	0.142562	3	2.22	P36507	108	1.663	Up	0.0022007	K	Dual specificity mitogen-activated protein kinase kinase 2 OS=Homo sapiens OX=9606 GN=MAP2K2 PE=1 SV=1	MAP2K2	1	4.9811e-05	95.483	LIHLEIK(1)PAIR	3	-0.84799	1	0.79	0.663	0.705	1.236	1.078	1.275
hsa05226 Gastric cancer	0.142562	3	2.22	O75197	526	6.771	Up	0.0093419	K	Low-density lipoprotein receptor-related protein 5 OS=Homo sapiens OX=9606 GN=LRP5 PE=1 SV=2	LRP5	1	0.0142367	76.073	TDK(1)IEVINVDGTK	2	2.3659	1	0.196	0.27	0.207	1.517	0.67	2.37
hsa05226 Gastric cancer	0.142562	3	2.22	P35221	881	1.511	Up	0.00040268	K	Catenin alpha-1 OS=Homo sapiens OX=9606 GN=CTNNA1 PE=1 SV=1	CTNNA1	1	0.00164808	73.927	EKQDETQTK(1)IK	3	0.98541	1	0.774	0.811	0.723	1.193	1.172	1.122
hsa04934 Cushing syndrome	0.636747	2	0.96	P36507	108	1.663	Up	0.0022007	K	Dual specificity mitogen-activated protein kinase kinase 2 OS=Homo sapiens OX=9606 GN=MAP2K2 PE=1 SV=1	MAP2K2	1	4.9811e-05	95.483	LIHLEIK(1)PAIR	3	-0.84799	1	0.79	0.663	0.705	1.236	1.078	1.275
hsa04934 Cushing syndrome	0.636747	2	0.96	Q13557	268	2.448	Up	0.00064196	K	Calcium/calmodulin-dependent protein kinase type II subunit delta OS=Homo sapiens OX=9606 GN=CAMK2D PE=1 SV=3	CAMK2D	1	9.73432e-06	94.09	ITASEALK(1)HPWICQR	3	-2.1026	1	0.448	0.594	0.572	1.394	1.259	1.298
hsa04925 Aldosterone synthesis and secretion	0.693261	1	0.91	Q13557	268	2.448	Up	0.00064196	K	Calcium/calmodulin-dependent protein kinase type II subunit delta OS=Homo sapiens OX=9606 GN=CAMK2D PE=1 SV=3	CAMK2D	1	9.73432e-06	94.09	ITASEALK(1)HPWICQR	3	-2.1026	1	0.448	0.594	0.572	1.394	1.259	1.298
hsa04072 Phospholipase D signaling pathway	0.566312	2	1.09	P36507	108	1.663	Up	0.0022007	K	Dual specificity mitogen-activated protein kinase kinase 2 OS=Homo sapiens OX=9606 GN=MAP2K2 PE=1 SV=1	MAP2K2	1	4.9811e-05	95.483	LIHLEIK(1)PAIR	3	-0.84799	1	0.79	0.663	0.705	1.236	1.078	1.275
hsa04072 Phospholipase D signaling pathway	0.566312	2	1.09	Q15382	97	1.749	Up	0.000122954	K	GTP-binding protein Rheb OS=Homo sapiens OX=9606 GN=RHEB PE=1 SV=1	RHEB	1	0.0026732	65.842	SFEVIK(1)VIHGK	3	1.1424	1	0.669	0.666	0.743	1.19	1.244	1.201
hsa00071 Fatty acid degradation	0.928612	1	0.41	Q16836	301	1.579	Up	0.00090275	K	Hydroxyacyl-coenzyme A dehydrogenase, mitochondrial OS=Homo sapiens OX=9606 GN=HADH PE=1 SV=3	HADH	1	0.00585392	66.27	LVAENK(1)FGK	3	0.9182	1	0.745	0.808	0.684	1.199	1.132	1.202
hsa03420 Nucleotide excision repair	0.160958	2	2.72	Q16531	191	1.804	Up	3.8213e-05	K	DNA damage-binding protein 1 OS=Homo sapiens OX=9606 GN=DDB1 PE=1 SV=1	DDB1	1	5.7889e-05	94.363	HVK(1)TYEVSLR	3	-1.2231	2	0.644	0.677	0.712	1.233	1.223	1.211
hsa03420 Nucleotide excision repair	0.160958	2	2.72	P27694	163	2.076	Up	1.81648e-05	K	Replication protein A 70 kDa DNA-binding subunit OS=Homo sapiens OX=9606 GN=RPA1 PE=1 SV=2	RPA1	1	9.99335e-08	143.97	AYGASK(1)TFGK	3	1.1683	2	0.616	0.618	0.6	1.341	1.243	1.224
hsa03050 Proteasome	0.808619	3	0.72	P62333	206	2.136	Up	0.00048094	K	26S proteasome regulatory subunit 10B OS=Homo sapiens OX=9606 GN=PSMC6 PE=1 SV=1	PSMC6	1	0.000150997	83.37	VVSSSIVDK(1)YIGESAR	3	-0.50553	1	0.626	0.649	0.518	1.227	1.325	1.278
hsa03050 Proteasome	0.808619	3	0.72	P62333	322	1.784	Up	0.040963	K	26S proteasome regulatory subunit 10B OS=Homo sapiens OX=9606 GN=PSMC6 PE=1 SV=1	PSMC6	1	3.68076e-07	92.39	IHAGPITK(1)HGEIDYEAIVK	4	0.89264	1	0.667	0.664	0.727	1.374	1.471	0.826
hsa03050 Proteasome	0.808619	3	0.72	P62195	330	2.306	Up	0.0105445	K	26S proteasome regulatory subunit 8 OS=Homo sapiens OX=9606 GN=PSMC5 PE=1 SV=1	PSMC5	1	0.006593	64.82	LDILK(1)IHSR	3	-0.7783	1	0.602	0.591	0.492	0.932	1.66	1.293
hsa03050 Proteasome	0.808619	3	0.72	Q15008	130	1.786	Up	0.0002359	K	26S proteasome non-ATPase regulatory subunit 6 OS=Homo sapiens OX=9606 GN=PSMD6 PE=1 SV=1	PSMD6	1	0.00511348	57.885	TYDK(1)TVALGHR	3	-1.9991	1	0.682	0.722	0.643	1.2	1.162	1.294
hsa04740 Olfactory transduction	0.160958	2	2.72	Q13557	268	2.448	Up	0.00064196	K	Calcium/calmodulin-dependent protein kinase type II subunit delta OS=Homo sapiens OX=9606 GN=CAMK2D PE=1 SV=3	CAMK2D	1	9.73432e-06	94.09	ITASEALK(1)HPWICQR	3	-2.1026	1	0.448	0.594	0.572	1.394	1.259	1.298
hsa04740 Olfactory transduction	0.160958	2	2.72	Q8NGZ5	301	1.976	Up	3.3313e-06	K	Olfactory receptor 2G2 OS=Homo sapiens OX=9606 GN=OR2G2 PE=3 SV=1	OR2G2	1	0.0393046	75.738	EVK(1)GALK	2	-0.3398	1	0.658	0.629	0.616	1.28	1.24	1.24
hsa04922 Glucagon signaling pathway	0.121562	5	1.85	Q09472	1769	4.035	Up	2.2499e-07	K	Histone acetyltransferase p300 OS=Homo sapiens OX=9606 GN=EP300 PE=1 SV=2	EP300	1	1.89332e-49	208.56	VVQHTK(1)GCK(1)R	2	0.47995	5	0.357	0.351	0.363	1.501	1.405	1.415
hsa04922 Glucagon signaling pathway	0.121562	5	1.85	Q09472	1772	11.928	Up	3.2215e-07	K	Histone acetyltransferase p300 OS=Homo sapiens OX=9606 GN=EP300 PE=1 SV=2	EP300	1	1.89332e-49	208.56	VVQHTK(1)GCK(1)R	2	0.47995	3	0.123	0.136	0.141	1.65	1.565	1.556
hsa04922 Glucagon signaling pathway	0.121562	5	1.85	Q09472	1762	7.585	Up	0.00119748	K	Histone acetyltransferase p300 OS=Homo sapiens OX=9606 GN=EP300 PE=1 SV=2	EP300	1	2.32223e-16	145.52	NANCSLPSCQK(1)MK(1)R	2	-1.3586	2	0.201	0.229	0.18	1.533	1.572	1.522
hsa04922 Glucagon signaling pathway	0.121562	5	1.85	Q09472	1774	3.958	Up	0.0092049	K	Histone acetyltransferase p300 OS=Homo sapiens OX=9606 GN=EP300 PE=1 SV=2	EP300	1	0.000167046	115.33	K(1)TNGGCPICK	3	-1.4801	4	0.287	0.344	0.456	1.437	1.433	1.432
hsa04922 Glucagon signaling pathway	0.121562	5	1.85	Q09472	1704	1.891	Up	5.0177e-07	K	Histone acetyltransferase p300 OS=Homo sapiens OX=9606 GN=EP300 PE=1 SV=2	EP300	1	2.47609e-10	80.688	NHDHK(1)MEK(1)LGLGLDDESNNQQAAATQSPGDSR	4	4.3749	6	0.642	0.664	0.659	1.234	1.257	1.224
hsa04922 Glucagon signaling pathway	0.121562	5	1.85	Q09472	1760	1.885	Up	3.5127e-06	K	Histone acetyltransferase p300 OS=Homo sapiens OX=9606 GN=EP300 PE=1 SV=2	EP300	1	2.32223e-16	145.52	NANCSLPSCQK(1)MK(1)R	2	-1.3586	5	0.642	0.648	0.679	1.223	1.266	1.222
hsa04922 Glucagon signaling pathway	0.121562	5	1.85	P00338	222	1.546	Up	0.0049956	K	L-lactate dehydrogenase A chain OS=Homo sapiens OX=9606 GN=LDHA PE=1 SV=2	LDHA	1	0.000110087	92.295	TLHPDLGTDK(1)DK	3	0.56364	1	0.676	0.813	0.781	1.204	1.256	1.05
hsa04922 Glucagon signaling pathway	0.121562	5	1.85	P18669	100	3.015	Up	6.0532e-07	K	Phosphoglycerate mutase 1 OS=Homo sapiens OX=9606 GN=PGAM1 PE=1 SV=2	PGAM1	1	1.97868e-12	123.76	HYGGLTGLNK(1)AETAAK	4	-0.50082	6	0.457	0.452	0.458	1.395	1.414	1.312
hsa04922 Glucagon signaling pathway	0.121562	5	1.85	Q13557	268	2.448	Up	0.00064196	K	Calcium/calmodulin-dependent protein kinase type II subunit delta OS=Homo sapiens OX=9606 GN=CAMK2D PE=1 SV=3	CAMK2D	1	9.73432e-06	94.09	ITASEALK(1)HPWICQR	3	-2.1026	1	0.448	0.594	0.572	1.394	1.259	1.298
hsa04922 Glucagon signaling pathway	0.121562	5	1.85	Q92793	1811	7.596	Up	0.00094031	K	CREB-binding protein OS=Homo sapiens OX=9606 GN=CREBBP PE=1 SV=3	CREBBP	1	0.00377762	83.182	K(1)TNGGCPVCK	2	0.18561	1	0.185	0.196	0.228	1.546	1.535	1.545
hsa04722 Neurotrophin signaling pathway	0.347308	3	1.44	P36507	108	1.663	Up	0.0022007	K	Dual specificity mitogen-activated protein kinase kinase 2 OS=Homo sapiens OX=9606 GN=MAP2K2 PE=1 SV=1	MAP2K2	1	4.9811e-05	95.483	LIHLEIK(1)PAIR	3	-0.84799	1	0.79	0.663	0.705	1.236	1.078	1.275
hsa04722 Neurotrophin signaling pathway	0.347308	3	1.44	P52565	141	1.57	Up	1.6764e-06	K	Rho GDP-dissociation inhibitor 1 OS=Homo sapiens OX=9606 GN=ARHGDIA PE=1 SV=3	ARHGDIA	1	4.39749e-58	222.45	IDK(1)TDYMVGSYGPR	3	-0.56445	5	0.76	0.752	0.735	1.193	1.165	1.169
hsa04722 Neurotrophin signaling pathway	0.347308	3	1.44	Q13557	268	2.448	Up	0.00064196	K	Calcium/calmodulin-dependent protein kinase type II subunit delta OS=Homo sapiens OX=9606 GN=CAMK2D PE=1 SV=3	CAMK2D	1	9.73432e-06	94.09	ITASEALK(1)HPWICQR	3	-2.1026	1	0.448	0.594	0.572	1.394	1.259	1.298
hsa05235 PD-L1 expression and PD-1 checkpoint pathway in cancer	0.819163	1	0.63	P36507	108	1.663	Up	0.0022007	K	Dual specificity mitogen-activated protein kinase kinase 2 OS=Homo sapiens OX=9606 GN=MAP2K2 PE=1 SV=1	MAP2K2	1	4.9811e-05	95.483	LIHLEIK(1)PAIR	3	-0.84799	1	0.79	0.663	0.705	1.236	1.078	1.275
hsa04218 Cellular senescence	0.711179	3	0.84	P36507	108	1.663	Up	0.0022007	K	Dual specificity mitogen-activated protein kinase kinase 2 OS=Homo sapiens OX=9606 GN=MAP2K2 PE=1 SV=1	MAP2K2	1	4.9811e-05	95.483	LIHLEIK(1)PAIR	3	-0.84799	1	0.79	0.663	0.705	1.236	1.078	1.275
hsa04218 Cellular senescence	0.711179	3	0.84	P21796	61	1.877	Up	2.673e-06	K	Voltage-dependent anion-selective channel protein 1 OS=Homo sapiens OX=9606 GN=VDAC1 PE=1 SV=2	VDAC1	1	0.00011548	117.25	VTGSLETK(1)YR	3	1.0352	3	0.663	0.636	0.677	1.244	1.244	1.221
hsa04218 Cellular senescence	0.711179	3	0.84	P21796	20	1.506	Up	6.0692e-05	K	Voltage-dependent anion-selective channel protein 1 OS=Homo sapiens OX=9606 GN=VDAC1 PE=1 SV=2	VDAC1	1	5.63016e-11	131.66	DVFTK(1)GYGFGLIK	2	0.76596	2	0.765	0.794	0.754	1.198	1.157	1.128
hsa04218 Cellular senescence	0.711179	3	0.84	Q15382	97	1.749	Up	0.000122954	K	GTP-binding protein Rheb OS=Homo sapiens OX=9606 GN=RHEB PE=1 SV=1	RHEB	1	0.0026732	65.842	SFEVIK(1)VIHGK	3	1.1424	1	0.669	0.666	0.743	1.19	1.244	1.201
hsa04144 Endocytosis	0.976855	3	0.44	Q9H444	14	1.582	Up	0.0041192	K	Charged multivesicular body protein 4b OS=Homo sapiens OX=9606 GN=CHMP4B PE=1 SV=1	CHMP4B	1	3.09123e-05	113.93	LFGAGGGK(1)AGK	3	-0.24622	2	0.803	0.777	0.655	1.145	1.286	1.105
hsa04144 Endocytosis	0.976855	3	0.44	P59998	89	1.616	Up	1.98346e-05	K	Actin-related protein 2/3 complex subunit 4 OS=Homo sapiens OX=9606 GN=ARPC4 PE=1 SV=3	ARPC4	1	0.00095295	104.75	ILCHK(1)FMR	3	-0.82501	1	0.745	0.733	0.723	1.215	1.143	1.199
hsa04144 Endocytosis	0.976855	3	0.44	Q03135	57	1.523	Up	0.0012176	K	Caveolin-1 OS=Homo sapiens OX=9606 GN=CAV1 PE=1 SV=4	CAV1	1	0.00201216	67.997	DPK(1)HLNDDVVK	3	1.0261	1	0.694	0.781	0.816	1.145	1.139	1.206
hsa04728 Dopaminergic synapse	0.928612	1	0.41	Q13557	268	2.448	Up	0.00064196	K	Calcium/calmodulin-dependent protein kinase type II subunit delta OS=Homo sapiens OX=9606 GN=CAMK2D PE=1 SV=3	CAMK2D	1	9.73432e-06	94.09	ITASEALK(1)HPWICQR	3	-2.1026	1	0.448	0.594	0.572	1.394	1.259	1.298
hsa00330 Arginine and proline metabolism	0.893599	1	0.48	P17174	97	1.571	Up	0.0062823	K	Aspartate aminotransferase, cytoplasmic OS=Homo sapiens OX=9606 GN=GOT1 PE=1 SV=3	GOT1	1	0.000526115	69.03	LALGDDSPALK(1)EK	3	4.0464	1	0.768	0.717	0.76	1.092	1.374	1.06
hsa04933 AGE-RAGE signaling pathway in diabetic complications	0.443608	2	1.36	P15692	149	1.52	Up	0.0183197	K	Vascular endothelial growth factor A OS=Homo sapiens OX=9606 GN=VEGFA PE=1 SV=2	VEGFA	1	0.0158118	68.016	GK(1)GK(1)GQK(1)R	3	0.20842	1	0.619	0.836	0.835	1.054	1.197	1.23
hsa04933 AGE-RAGE signaling pathway in diabetic complications	0.443608	2	1.36	P15692	147	1.52	Up	0.0183197	K	Vascular endothelial growth factor A OS=Homo sapiens OX=9606 GN=VEGFA PE=1 SV=2	VEGFA	1	0.0158118	68.016	GK(1)GK(1)GQK(1)R	3	0.20842	1	0.619	0.836	0.835	1.054	1.197	1.23
hsa04933 AGE-RAGE signaling pathway in diabetic complications	0.443608	2	1.36	P15692	152	1.52	Up	0.0183197	K	Vascular endothelial growth factor A OS=Homo sapiens OX=9606 GN=VEGFA PE=1 SV=2	VEGFA	1	0.0158118	68.016	GK(1)GK(1)GQK(1)R	3	0.20842	1	0.619	0.836	0.835	1.054	1.197	1.23
hsa04933 AGE-RAGE signaling pathway in diabetic complications	0.443608	2	1.36	P13726	233	2.168	Up	0.00033987	K	Tissue factor OS=Homo sapiens OX=9606 GN=F3 PE=1 SV=1	F3	1	2.77667e-05	95.57	K(1)STDSPVECMGQEK	3	2.065	1	0.588	0.527	0.659	1.34	1.252	1.254
hsa04725 Cholinergic synapse	0.650049	1	1.02	Q13557	268	2.448	Up	0.00064196	K	Calcium/calmodulin-dependent protein kinase type II subunit delta OS=Homo sapiens OX=9606 GN=CAMK2D PE=1 SV=3	CAMK2D	1	9.73432e-06	94.09	ITASEALK(1)HPWICQR	3	-2.1026	1	0.448	0.594	0.572	1.394	1.259	1.298
hsa04921 Oxytocin signaling pathway	0.222833	4	1.63	P36507	108	1.663	Up	0.0022007	K	Dual specificity mitogen-activated protein kinase kinase 2 OS=Homo sapiens OX=9606 GN=MAP2K2 PE=1 SV=1	MAP2K2	1	4.9811e-05	95.483	LIHLEIK(1)PAIR	3	-0.84799	1	0.79	0.663	0.705	1.236	1.078	1.275
hsa04921 Oxytocin signaling pathway	0.222833	4	1.63	P13639	32	1.652	Up	0.0028208	K	Elongation factor 2 OS=Homo sapiens OX=9606 GN=EEF2 PE=1 SV=4	EEF2	1	0.000910029	50.858	NMSVIAHVDHGK(1)STLTDSLVCK	4	-0.77941	1	0.655	0.728	0.777	1.058	1.229	1.282
hsa04921 Oxytocin signaling pathway	0.222833	4	1.63	Q13557	268	2.448	Up	0.00064196	K	Calcium/calmodulin-dependent protein kinase type II subunit delta OS=Homo sapiens OX=9606 GN=CAMK2D PE=1 SV=3	CAMK2D	1	9.73432e-06	94.09	ITASEALK(1)HPWICQR	3	-2.1026	1	0.448	0.594	0.572	1.394	1.259	1.298
hsa04921 Oxytocin signaling pathway	0.222833	4	1.63	P63261	50	2.044	Up	0.00151871	K	Actin, cytoplasmic 2 OS=Homo sapiens OX=9606 GN=ACTG1 PE=1 SV=1	ACTG1	1	1.73645e-08	74.364	HQGVMVGMGQK(1)DSYVGDEAQSK	3	-0.91047	1	0.53	0.605	0.719	1.328	1.267	1.194
hsa05221 Acute myeloid leukemia	0.544675	1	1.36	P36507	108	1.663	Up	0.0022007	K	Dual specificity mitogen-activated protein kinase kinase 2 OS=Homo sapiens OX=9606 GN=MAP2K2 PE=1 SV=1	MAP2K2	1	4.9811e-05	95.483	LIHLEIK(1)PAIR	3	-0.84799	1	0.79	0.663	0.705	1.236	1.078	1.275
hsa04514 Cell adhesion molecules (CAMs)	0.480722	1	1.63	P23229	144	3.768	Up	1.57151e-05	K	Integrin alpha-6 OS=Homo sapiens OX=9606 GN=ITGA6 PE=1 SV=5	ITGA6	1	3.1719e-06	130.01	QHVNTK(1)QESR	2	1.0391	2	0.354	0.398	0.382	1.474	1.325	1.474
hsa04514 Cell adhesion molecules (CAMs)	0.480722	1	1.63	P23229	594	2.852	Up	0.0097615	K	Integrin alpha-6 OS=Homo sapiens OX=9606 GN=ITGA6 PE=1 SV=5	ITGA6	1	0.0014851	102.53	YTQELTLK(1)R	2	0.55207	2	0.382	0.524	0.521	1.331	1.345	1.394
hsa05418 Fluid shear stress and atherosclerosis	0.42693	4	1.21	P15692	149	1.52	Up	0.0183197	K	Vascular endothelial growth factor A OS=Homo sapiens OX=9606 GN=VEGFA PE=1 SV=2	VEGFA	1	0.0158118	68.016	GK(1)GK(1)GQK(1)R	3	0.20842	1	0.619	0.836	0.835	1.054	1.197	1.23
hsa05418 Fluid shear stress and atherosclerosis	0.42693	4	1.21	P15692	147	1.52	Up	0.0183197	K	Vascular endothelial growth factor A OS=Homo sapiens OX=9606 GN=VEGFA PE=1 SV=2	VEGFA	1	0.0158118	68.016	GK(1)GK(1)GQK(1)R	3	0.20842	1	0.619	0.836	0.835	1.054	1.197	1.23
hsa05418 Fluid shear stress and atherosclerosis	0.42693	4	1.21	P15692	152	1.52	Up	0.0183197	K	Vascular endothelial growth factor A OS=Homo sapiens OX=9606 GN=VEGFA PE=1 SV=2	VEGFA	1	0.0158118	68.016	GK(1)GK(1)GQK(1)R	3	0.20842	1	0.619	0.836	0.835	1.054	1.197	1.23
hsa05418 Fluid shear stress and atherosclerosis	0.42693	4	1.21	P14625	467	2.375	Up	0.00132479	K	Endoplasmin OS=Homo sapiens OX=9606 GN=HSP90B1 PE=1 SV=1	HSP90B1	1	0.0260932	82.287	K(1)TLDMIK	2	-1.9897	1	0.517	0.571	0.564	1.316	1.312	1.296
hsa05418 Fluid shear stress and atherosclerosis	0.42693	4	1.21	P14625	473	1.531	Up	0.0021359	K	Endoplasmin OS=Homo sapiens OX=9606 GN=HSP90B1 PE=1 SV=1	HSP90B1	1	0.0291692	80.438	TLDMIK(1)K	3	-0.98878	2	0.833	0.741	0.715	1.239	1.084	1.181
hsa05418 Fluid shear stress and atherosclerosis	0.42693	4	1.21	P63261	50	2.044	Up	0.00151871	K	Actin, cytoplasmic 2 OS=Homo sapiens OX=9606 GN=ACTG1 PE=1 SV=1	ACTG1	1	1.73645e-08	74.364	HQGVMVGMGQK(1)DSYVGDEAQSK	3	-0.91047	1	0.53	0.605	0.719	1.328	1.267	1.194
hsa05418 Fluid shear stress and atherosclerosis	0.42693	4	1.21	Q03135	57	1.523	Up	0.0012176	K	Caveolin-1 OS=Homo sapiens OX=9606 GN=CAV1 PE=1 SV=4	CAV1	1	0.00201216	67.997	DPK(1)HLNDDVVK	3	1.0261	1	0.694	0.781	0.816	1.145	1.139	1.206
hsa05010 Alzheimer disease	0.744239	4	0.82	P31040	250	1.834	Up	3.6211e-05	K	Succinate dehydrogenase [ubiquinone] flavoprotein subunit, mitochondrial OS=Homo sapiens OX=9606 GN=SDHA PE=1 SV=2	SDHA	1	4.99908e-10	121.48	AK(1)NTVVATGGYGR	2	-0.32717	1	0.651	0.652	0.705	1.211	1.212	1.26
hsa05010 Alzheimer disease	0.744239	4	0.82	P48047	90	1.539	Up	3.6942e-05	K	ATP synthase subunit O, mitochondrial OS=Homo sapiens OX=9606 GN=ATP5PO PE=1 SV=1	ATP5PO	1	4.77131e-05	120.87	VK(1)SLNDITAK	3	-0.097512	2	0.786	0.739	0.752	1.171	1.146	1.188
hsa05010 Alzheimer disease	0.744239	4	0.82	P47985	101	1.523	Up	0.031261	K	Cytochrome b-c1 complex subunit Rieske, mitochondrial OS=Homo sapiens OX=9606 GN=UQCRFS1 PE=1 SV=2	UQCRFS1	1	0.00038399	92.99	LEVLDSTK(1)SSR	2	-1.559	1	0.714	0.657	0.922	1.111	1.353	1.029
hsa05010 Alzheimer disease	0.744239	4	0.82	Q13564	207	1.787	Up	0.000102642	K	NEDD8-activating enzyme E1 regulatory subunit OS=Homo sapiens OX=9606 GN=NAE1 PE=1 SV=1	NAE1	1	0.000348443	78.505	K(1)DHSHTPWIVIIAK	4	1.716	1	0.714	0.638	0.696	1.222	1.184	1.254
hsa00260 Glycine, serine and threonine metabolism	0.173819	3	2.04	P34897	200	1.553	Up	0.0024569	K	Serine hydroxymethyltransferase, mitochondrial OS=Homo sapiens OX=9606 GN=SHMT2 PE=1 SV=3	SHMT2	1	1.11032e-09	113.54	LNPK(1)TGLIDYNQLALTAR	3	-0.53359	1	0.671	0.753	0.836	1.158	1.146	1.206
hsa00260 Glycine, serine and threonine metabolism	0.173819	3	2.04	P13196	211	4.276	Up	0.0127581	K	5-aminolevulinate synthase, nonspecific, mitochondrial OS=Homo sapiens OX=9606 GN=ALAS1 PE=1 SV=2	ALAS1	1	0.00116209	113.41	K(1)NDHTYR	3	-0.80736	1	0.461	0.284	0.275	1.49	1.49	1.382
hsa00260 Glycine, serine and threonine metabolism	0.173819	3	2.04	P18669	100	3.015	Up	6.0532e-07	K	Phosphoglycerate mutase 1 OS=Homo sapiens OX=9606 GN=PGAM1 PE=1 SV=2	PGAM1	1	1.97868e-12	123.76	HYGGLTGLNK(1)AETAAK	4	-0.50082	6	0.457	0.452	0.458	1.395	1.414	1.312
hsa05132 Salmonella infection	0.518479	3	1.11	P21333	994	1.525	Up	1.9772e-05	K	Filamin-A OS=Homo sapiens OX=9606 GN=FLNA PE=1 SV=4	FLNA	1	0.00346172	85.813	DQEFTVK(1)SK	3	-0.051795	2	0.786	0.743	0.763	1.155	1.183	1.157
hsa05132 Salmonella infection	0.518479	3	1.11	P63261	50	2.044	Up	0.00151871	K	Actin, cytoplasmic 2 OS=Homo sapiens OX=9606 GN=ACTG1 PE=1 SV=1	ACTG1	1	1.73645e-08	74.364	HQGVMVGMGQK(1)DSYVGDEAQSK	3	-0.91047	1	0.53	0.605	0.719	1.328	1.267	1.194
hsa05132 Salmonella infection	0.518479	3	1.11	P59998	89	1.616	Up	1.98346e-05	K	Actin-related protein 2/3 complex subunit 4 OS=Homo sapiens OX=9606 GN=ARPC4 PE=1 SV=3	ARPC4	1	0.00095295	104.75	ILCHK(1)FMR	3	-0.82501	1	0.745	0.733	0.723	1.215	1.143	1.199
hsa04512 ECM-receptor interaction	0.000840279	6	4.45	P18564	548	1.991	Up	0.0032991	K	Integrin beta-6 OS=Homo sapiens OX=9606 GN=ITGB6 PE=1 SV=2	ITGB6	1	9.92231e-07	77.037	HK(1)GLLCGGNGDCDCGECVCR	3	-0.47256	1	0.5	0.688	0.699	1.2	1.299	1.258
hsa04512 ECM-receptor interaction	0.000840279	6	4.45	P23229	144	3.768	Up	1.57151e-05	K	Integrin alpha-6 OS=Homo sapiens OX=9606 GN=ITGA6 PE=1 SV=5	ITGA6	1	3.1719e-06	130.01	QHVNTK(1)QESR	2	1.0391	2	0.354	0.398	0.382	1.474	1.325	1.474
hsa04512 ECM-receptor interaction	0.000840279	6	4.45	P23229	594	2.852	Up	0.0097615	K	Integrin alpha-6 OS=Homo sapiens OX=9606 GN=ITGA6 PE=1 SV=5	ITGA6	1	0.0014851	102.53	YTQELTLK(1)R	2	0.55207	2	0.382	0.524	0.521	1.331	1.345	1.394
hsa04512 ECM-receptor interaction	0.000840279	6	4.45	P24043	3092	1.918	Up	1.50302e-05	K	Laminin subunit alpha-2 OS=Homo sapiens OX=9606 GN=LAMA2 PE=1 SV=4	LAMA2	1	0.0350388	67.385	GCIRSLK(1)LTK	2	3.4243	1	0.661	0.626	0.658	1.283	1.221	1.227
hsa04512 ECM-receptor interaction	0.000840279	6	4.45	P02458	1444	3.469	Up	1.93387e-05	K	Collagen alpha-1(II) chain OS=Homo sapiens OX=9606 GN=COL2A1 PE=1 SV=3	COL2A1	1	0.014601	68.915	HTGK(1)WGK	3	-0.79413	1	0.434	0.395	0.388	1.483	1.302	1.437
hsa04512 ECM-receptor interaction	0.000840279	6	4.45	Q16787	2135	1.622	Up	3.461e-06	K	Laminin subunit alpha-3 OS=Homo sapiens OX=9606 GN=LAMA3 PE=1 SV=2	LAMA3	1	0.000133898	89.507	SAGK(1)TSLVEEAEK	2	-0.15811	2	0.721	0.727	0.746	1.166	1.178	1.214
hsa04512 ECM-receptor interaction	0.000840279	6	4.45	P17301	261	4.97	Up	7.7205e-05	K	Integrin alpha-2 OS=Homo sapiens OX=9606 GN=ITGA2 PE=1 SV=1	ITGA2	1	5.75495e-08	138.89	K(1)YAYSAASGGR	2	-0.52946	1	0.253	0.307	0.334	1.631	1.406	1.406
hsa05168 Herpes simplex virus 1 infection	0.53958	4	1.05	Q06732	324	3.511	Up	1.60282e-05	K	Zinc finger protein 33B OS=Homo sapiens OX=9606 GN=ZNF33B PE=1 SV=2	ZNF33B	1	0.0267137	42.947	LCLSQLQK(1)GDK(1)GEK	3	-1.5976	1	0.437	0.378	0.39	1.453	1.367	1.411
hsa05168 Herpes simplex virus 1 infection	0.53958	4	1.05	Q06732	321	3.511	Up	1.60282e-05	K	Zinc finger protein 33B OS=Homo sapiens OX=9606 GN=ZNF33B PE=1 SV=2	ZNF33B	1	0.0267137	42.947	LCLSQLQK(1)GDK(1)GEK	3	-1.5976	1	0.437	0.378	0.39	1.453	1.367	1.411
hsa05168 Herpes simplex virus 1 infection	0.53958	4	1.05	P30101	494	1.633	Up	0.00061616	K	Protein disulfide-isomerase A3 OS=Homo sapiens OX=9606 GN=PDIA3 PE=1 SV=4	PDIA3	1	1.11552e-22	158.91	EATNPPVIQEEK(1)PK	2	-0.21724	3	0.713	0.703	0.767	1.119	1.287	1.158
hsa05168 Herpes simplex virus 1 infection	0.53958	4	1.05	Q15382	97	1.749	Up	0.000122954	K	GTP-binding protein Rheb OS=Homo sapiens OX=9606 GN=RHEB PE=1 SV=1	RHEB	1	0.0026732	65.842	SFEVIK(1)VIHGK	3	1.1424	1	0.669	0.666	0.743	1.19	1.244	1.201
hsa05168 Herpes simplex virus 1 infection	0.53958	4	1.05	Q96SE7	104	2.123	Up	0.00042043	K	Zinc finger protein 347 OS=Homo sapiens OX=9606 GN=ZNF347 PE=1 SV=2	ZNF347	1	0.0239595	58.917	DLLHK(1)GK	3	1.4082	2	0.585	0.679	0.538	1.297	1.298	1.231
hsa04917 Prolactin signaling pathway	0.693261	1	0.91	P36507	108	1.663	Up	0.0022007	K	Dual specificity mitogen-activated protein kinase kinase 2 OS=Homo sapiens OX=9606 GN=MAP2K2 PE=1 SV=1	MAP2K2	1	4.9811e-05	95.483	LIHLEIK(1)PAIR	3	-0.84799	1	0.79	0.663	0.705	1.236	1.078	1.275
hsa05165 Human papillomavirus infection	0.00829147	12	2.08	P15692	149	1.52	Up	0.0183197	K	Vascular endothelial growth factor A OS=Homo sapiens OX=9606 GN=VEGFA PE=1 SV=2	VEGFA	1	0.0158118	68.016	GK(1)GK(1)GQK(1)R	3	0.20842	1	0.619	0.836	0.835	1.054	1.197	1.23
hsa05165 Human papillomavirus infection	0.00829147	12	2.08	P15692	147	1.52	Up	0.0183197	K	Vascular endothelial growth factor A OS=Homo sapiens OX=9606 GN=VEGFA PE=1 SV=2	VEGFA	1	0.0158118	68.016	GK(1)GK(1)GQK(1)R	3	0.20842	1	0.619	0.836	0.835	1.054	1.197	1.23
hsa05165 Human papillomavirus infection	0.00829147	12	2.08	P15692	152	1.52	Up	0.0183197	K	Vascular endothelial growth factor A OS=Homo sapiens OX=9606 GN=VEGFA PE=1 SV=2	VEGFA	1	0.0158118	68.016	GK(1)GK(1)GQK(1)R	3	0.20842	1	0.619	0.836	0.835	1.054	1.197	1.23
hsa05165 Human papillomavirus infection	0.00829147	12	2.08	Q09472	1769	4.035	Up	2.2499e-07	K	Histone acetyltransferase p300 OS=Homo sapiens OX=9606 GN=EP300 PE=1 SV=2	EP300	1	1.89332e-49	208.56	VVQHTK(1)GCK(1)R	2	0.47995	5	0.357	0.351	0.363	1.501	1.405	1.415
hsa05165 Human papillomavirus infection	0.00829147	12	2.08	Q09472	1772	11.928	Up	3.2215e-07	K	Histone acetyltransferase p300 OS=Homo sapiens OX=9606 GN=EP300 PE=1 SV=2	EP300	1	1.89332e-49	208.56	VVQHTK(1)GCK(1)R	2	0.47995	3	0.123	0.136	0.141	1.65	1.565	1.556
hsa05165 Human papillomavirus infection	0.00829147	12	2.08	Q09472	1762	7.585	Up	0.00119748	K	Histone acetyltransferase p300 OS=Homo sapiens OX=9606 GN=EP300 PE=1 SV=2	EP300	1	2.32223e-16	145.52	NANCSLPSCQK(1)MK(1)R	2	-1.3586	2	0.201	0.229	0.18	1.533	1.572	1.522
hsa05165 Human papillomavirus infection	0.00829147	12	2.08	Q09472	1774	3.958	Up	0.0092049	K	Histone acetyltransferase p300 OS=Homo sapiens OX=9606 GN=EP300 PE=1 SV=2	EP300	1	0.000167046	115.33	K(1)TNGGCPICK	3	-1.4801	4	0.287	0.344	0.456	1.437	1.433	1.432
hsa05165 Human papillomavirus infection	0.00829147	12	2.08	Q09472	1704	1.891	Up	5.0177e-07	K	Histone acetyltransferase p300 OS=Homo sapiens OX=9606 GN=EP300 PE=1 SV=2	EP300	1	2.47609e-10	80.688	NHDHK(1)MEK(1)LGLGLDDESNNQQAAATQSPGDSR	4	4.3749	6	0.642	0.664	0.659	1.234	1.257	1.224
hsa05165 Human papillomavirus infection	0.00829147	12	2.08	Q09472	1760	1.885	Up	3.5127e-06	K	Histone acetyltransferase p300 OS=Homo sapiens OX=9606 GN=EP300 PE=1 SV=2	EP300	1	2.32223e-16	145.52	NANCSLPSCQK(1)MK(1)R	2	-1.3586	5	0.642	0.648	0.679	1.223	1.266	1.222
hsa05165 Human papillomavirus infection	0.00829147	12	2.08	P18564	548	1.991	Up	0.0032991	K	Integrin beta-6 OS=Homo sapiens OX=9606 GN=ITGB6 PE=1 SV=2	ITGB6	1	9.92231e-07	77.037	HK(1)GLLCGGNGDCDCGECVCR	3	-0.47256	1	0.5	0.688	0.699	1.2	1.299	1.258
hsa05165 Human papillomavirus infection	0.00829147	12	2.08	P36507	108	1.663	Up	0.0022007	K	Dual specificity mitogen-activated protein kinase kinase 2 OS=Homo sapiens OX=9606 GN=MAP2K2 PE=1 SV=1	MAP2K2	1	4.9811e-05	95.483	LIHLEIK(1)PAIR	3	-0.84799	1	0.79	0.663	0.705	1.236	1.078	1.275
hsa05165 Human papillomavirus infection	0.00829147	12	2.08	P23229	144	3.768	Up	1.57151e-05	K	Integrin alpha-6 OS=Homo sapiens OX=9606 GN=ITGA6 PE=1 SV=5	ITGA6	1	3.1719e-06	130.01	QHVNTK(1)QESR	2	1.0391	2	0.354	0.398	0.382	1.474	1.325	1.474
hsa05165 Human papillomavirus infection	0.00829147	12	2.08	P23229	594	2.852	Up	0.0097615	K	Integrin alpha-6 OS=Homo sapiens OX=9606 GN=ITGA6 PE=1 SV=5	ITGA6	1	0.0014851	102.53	YTQELTLK(1)R	2	0.55207	2	0.382	0.524	0.521	1.331	1.345	1.394
hsa05165 Human papillomavirus infection	0.00829147	12	2.08	Q15382	97	1.749	Up	0.000122954	K	GTP-binding protein Rheb OS=Homo sapiens OX=9606 GN=RHEB PE=1 SV=1	RHEB	1	0.0026732	65.842	SFEVIK(1)VIHGK	3	1.1424	1	0.669	0.666	0.743	1.19	1.244	1.201
hsa05165 Human papillomavirus infection	0.00829147	12	2.08	Q05086	30	1.55	Up	0.0156587	K	Ubiquitin-protein ligase E3A OS=Homo sapiens OX=9606 GN=UBE3A PE=1 SV=4	UBE3A	1	0.00220051	77.662	AAAK(1)HLIER	3	0.43631	1	0.706	0.91	0.653	1.279	1.144	1.093
hsa05165 Human papillomavirus infection	0.00829147	12	2.08	P24043	3092	1.918	Up	1.50302e-05	K	Laminin subunit alpha-2 OS=Homo sapiens OX=9606 GN=LAMA2 PE=1 SV=4	LAMA2	1	0.0350388	67.385	GCIRSLK(1)LTK	2	3.4243	1	0.661	0.626	0.658	1.283	1.221	1.227
hsa05165 Human papillomavirus infection	0.00829147	12	2.08	P02458	1444	3.469	Up	1.93387e-05	K	Collagen alpha-1(II) chain OS=Homo sapiens OX=9606 GN=COL2A1 PE=1 SV=3	COL2A1	1	0.014601	68.915	HTGK(1)WGK	3	-0.79413	1	0.434	0.395	0.388	1.483	1.302	1.437
hsa05165 Human papillomavirus infection	0.00829147	12	2.08	Q92793	1811	7.596	Up	0.00094031	K	CREB-binding protein OS=Homo sapiens OX=9606 GN=CREBBP PE=1 SV=3	CREBBP	1	0.00377762	83.182	K(1)TNGGCPVCK	2	0.18561	1	0.185	0.196	0.228	1.546	1.535	1.545
hsa05165 Human papillomavirus infection	0.00829147	12	2.08	Q16787	2135	1.622	Up	3.461e-06	K	Laminin subunit alpha-3 OS=Homo sapiens OX=9606 GN=LAMA3 PE=1 SV=2	LAMA3	1	0.000133898	89.507	SAGK(1)TSLVEEAEK	2	-0.15811	2	0.721	0.727	0.746	1.166	1.178	1.214
hsa05165 Human papillomavirus infection	0.00829147	12	2.08	P17301	261	4.97	Up	7.7205e-05	K	Integrin alpha-2 OS=Homo sapiens OX=9606 GN=ITGA2 PE=1 SV=1	ITGA2	1	5.75495e-08	138.89	K(1)YAYSAASGGR	2	-0.52946	1	0.253	0.307	0.334	1.631	1.406	1.406
hsa04670 Leukocyte transendothelial migration	0.452328	3	1.22	P63261	50	2.044	Up	0.00151871	K	Actin, cytoplasmic 2 OS=Homo sapiens OX=9606 GN=ACTG1 PE=1 SV=1	ACTG1	1	1.73645e-08	74.364	HQGVMVGMGQK(1)DSYVGDEAQSK	3	-0.91047	1	0.53	0.605	0.719	1.328	1.267	1.194
hsa04670 Leukocyte transendothelial migration	0.452328	3	1.22	P35221	881	1.511	Up	0.00040268	K	Catenin alpha-1 OS=Homo sapiens OX=9606 GN=CTNNA1 PE=1 SV=1	CTNNA1	1	0.00164808	73.927	EKQDETQTK(1)IK	3	0.98541	1	0.774	0.811	0.723	1.193	1.172	1.122
hsa04670 Leukocyte transendothelial migration	0.452328	3	1.22	O43707	779	1.506	Up	4.621e-06	K	Alpha-actinin-4 OS=Homo sapiens OX=9606 GN=ACTN4 PE=1 SV=2	ACTN4	1	2.1119e-07	92.098	ASFNHFDK(1)DHGGALGPEEFK	4	-0.48137	1	0.769	0.755	0.788	1.156	1.148	1.177
hsa00340 Histidine metabolism	0.650049	1	1.02	P47895	423	1.504	Up	1.81114e-05	K	Aldehyde dehydrogenase family 1 member A3 OS=Homo sapiens OX=9606 GN=ALDH1A3 PE=1 SV=2	ALDH1A3	1	3.01099e-05	135.99	FK(1)SIEEVIK	2	-0.13248	1	0.763	0.772	0.78	1.196	1.14	1.145
hsa05135 Yersinia infection	0.308828	4	1.42	P36507	108	1.663	Up	0.0022007	K	Dual specificity mitogen-activated protein kinase kinase 2 OS=Homo sapiens OX=9606 GN=MAP2K2 PE=1 SV=1	MAP2K2	1	4.9811e-05	95.483	LIHLEIK(1)PAIR	3	-0.84799	1	0.79	0.663	0.705	1.236	1.078	1.275
hsa05135 Yersinia infection	0.308828	4	1.42	Q14185	641	2.953	Up	0.001995	K	Dedicator of cytokinesis protein 1 OS=Homo sapiens OX=9606 GN=DOCK1 PE=1 SV=2	DOCK1	1	0.0385614	45.28	QLMK(1)VDGGEVVK	2	-2.6314	1	0.509	0.442	0.439	1.378	1.372	1.355
hsa05135 Yersinia infection	0.308828	4	1.42	P63261	50	2.044	Up	0.00151871	K	Actin, cytoplasmic 2 OS=Homo sapiens OX=9606 GN=ACTG1 PE=1 SV=1	ACTG1	1	1.73645e-08	74.364	HQGVMVGMGQK(1)DSYVGDEAQSK	3	-0.91047	1	0.53	0.605	0.719	1.328	1.267	1.194
hsa05135 Yersinia infection	0.308828	4	1.42	Q8N1W1	979	2.153	Up	2.4419e-05	K	Rho guanine nucleotide exchange factor 28 OS=Homo sapiens OX=9606 GN=ARHGEF28 PE=1 SV=3	ARHGEF28	1	0.026785	64.265	FQNFIK(1)LR	2	-0.53398	1	0.591	0.56	0.631	1.263	1.306	1.268
hsa00062 Fatty acid elongation	0.764422	1	0.74	Q16836	301	1.579	Up	0.00090275	K	Hydroxyacyl-coenzyme A dehydrogenase, mitochondrial OS=Homo sapiens OX=9606 GN=HADH PE=1 SV=3	HADH	1	0.00585392	66.27	LVAENK(1)FGK	3	0.9182	1	0.745	0.808	0.684	1.199	1.132	1.202
hsa00140 Steroid hormone biosynthesis	0.160958	2	2.72	P37059	252	1.662	Up	0.0022599	K	Estradiol 17-beta-dehydrogenase 2 OS=Homo sapiens OX=9606 GN=HSD17B2 PE=1 SV=1	HSD17B2	1	0.00141145	97.734	LELSK(1)WGIK	3	0.69419	2	0.719	0.755	0.681	1.184	1.062	1.336
hsa00140 Steroid hormone biosynthesis	0.160958	2	2.72	Q04828	207	2.087	Up	2.0691e-05	K	Aldo-keto reductase family 1 member C1 OS=Homo sapiens OX=9606 GN=AKR1C1 PE=1 SV=1	AKR1C1	1	0.00529129	96.342	LLDFCK(1)SK	3	0.41295	2	0.638	0.613	0.575	1.289	1.244	1.277
hsa00140 Steroid hormone biosynthesis	0.160958	2	2.72	Q04828	270	2.181	Up	2.1767e-06	K	Aldo-keto reductase family 1 member C1 OS=Homo sapiens OX=9606 GN=AKR1C1 PE=1 SV=1	AKR1C1	1	1.43268e-36	194.86	GVVVLAK(1)SYNEQR	2	-0.46789	2	0.574	0.577	0.614	1.299	1.284	1.267
hsa00270 Cysteine and methionine metabolism	0.697968	2	0.86	P00338	222	1.546	Up	0.0049956	K	L-lactate dehydrogenase A chain OS=Homo sapiens OX=9606 GN=LDHA PE=1 SV=2	LDHA	1	0.000110087	92.295	TLHPDLGTDK(1)DK	3	0.56364	1	0.676	0.813	0.781	1.204	1.256	1.05
hsa00270 Cysteine and methionine metabolism	0.697968	2	0.86	P17174	97	1.571	Up	0.0062823	K	Aspartate aminotransferase, cytoplasmic OS=Homo sapiens OX=9606 GN=GOT1 PE=1 SV=3	GOT1	1	0.000526115	69.03	LALGDDSPALK(1)EK	3	4.0464	1	0.768	0.717	0.76	1.092	1.374	1.06
hsa05164 Influenza A	0.0861465	7	1.78	Q09472	1769	4.035	Up	2.2499e-07	K	Histone acetyltransferase p300 OS=Homo sapiens OX=9606 GN=EP300 PE=1 SV=2	EP300	1	1.89332e-49	208.56	VVQHTK(1)GCK(1)R	2	0.47995	5	0.357	0.351	0.363	1.501	1.405	1.415
hsa05164 Influenza A	0.0861465	7	1.78	Q09472	1772	11.928	Up	3.2215e-07	K	Histone acetyltransferase p300 OS=Homo sapiens OX=9606 GN=EP300 PE=1 SV=2	EP300	1	1.89332e-49	208.56	VVQHTK(1)GCK(1)R	2	0.47995	3	0.123	0.136	0.141	1.65	1.565	1.556
hsa05164 Influenza A	0.0861465	7	1.78	Q09472	1762	7.585	Up	0.00119748	K	Histone acetyltransferase p300 OS=Homo sapiens OX=9606 GN=EP300 PE=1 SV=2	EP300	1	2.32223e-16	145.52	NANCSLPSCQK(1)MK(1)R	2	-1.3586	2	0.201	0.229	0.18	1.533	1.572	1.522
hsa05164 Influenza A	0.0861465	7	1.78	Q09472	1774	3.958	Up	0.0092049	K	Histone acetyltransferase p300 OS=Homo sapiens OX=9606 GN=EP300 PE=1 SV=2	EP300	1	0.000167046	115.33	K(1)TNGGCPICK	3	-1.4801	4	0.287	0.344	0.456	1.437	1.433	1.432
hsa05164 Influenza A	0.0861465	7	1.78	Q09472	1704	1.891	Up	5.0177e-07	K	Histone acetyltransferase p300 OS=Homo sapiens OX=9606 GN=EP300 PE=1 SV=2	EP300	1	2.47609e-10	80.688	NHDHK(1)MEK(1)LGLGLDDESNNQQAAATQSPGDSR	4	4.3749	6	0.642	0.664	0.659	1.234	1.257	1.224
hsa05164 Influenza A	0.0861465	7	1.78	Q09472	1760	1.885	Up	3.5127e-06	K	Histone acetyltransferase p300 OS=Homo sapiens OX=9606 GN=EP300 PE=1 SV=2	EP300	1	2.32223e-16	145.52	NANCSLPSCQK(1)MK(1)R	2	-1.3586	5	0.642	0.648	0.679	1.223	1.266	1.222
hsa05164 Influenza A	0.0861465	7	1.78	Q9NRS4	249	1.837	Up	2.0037e-05	K	Transmembrane protease serine 4 OS=Homo sapiens OX=9606 GN=TMPRSS4 PE=1 SV=2	TMPRSS4	1	0.00432063	74.173	K(1)HTDVFNWK	3	-0.09216	1	0.682	0.664	0.659	1.182	1.219	1.283
hsa05164 Influenza A	0.0861465	7	1.78	P36507	108	1.663	Up	0.0022007	K	Dual specificity mitogen-activated protein kinase kinase 2 OS=Homo sapiens OX=9606 GN=MAP2K2 PE=1 SV=1	MAP2K2	1	4.9811e-05	95.483	LIHLEIK(1)PAIR	3	-0.84799	1	0.79	0.663	0.705	1.236	1.078	1.275
hsa05164 Influenza A	0.0861465	7	1.78	P21796	61	1.877	Up	2.673e-06	K	Voltage-dependent anion-selective channel protein 1 OS=Homo sapiens OX=9606 GN=VDAC1 PE=1 SV=2	VDAC1	1	0.00011548	117.25	VTGSLETK(1)YR	3	1.0352	3	0.663	0.636	0.677	1.244	1.244	1.221
hsa05164 Influenza A	0.0861465	7	1.78	P21796	20	1.506	Up	6.0692e-05	K	Voltage-dependent anion-selective channel protein 1 OS=Homo sapiens OX=9606 GN=VDAC1 PE=1 SV=2	VDAC1	1	5.63016e-11	131.66	DVFTK(1)GYGFGLIK	2	0.76596	2	0.765	0.794	0.754	1.198	1.157	1.128
hsa05164 Influenza A	0.0861465	7	1.78	P25685	35	1.664	Up	0.000144468	K	DnaJ homolog subfamily B member 1 OS=Homo sapiens OX=9606 GN=DNAJB1 PE=1 SV=4	DNAJB1	1	0.0161937	67.032	YHPDK(1)NK	3	3.4717	2	0.753	0.692	0.711	1.223	1.134	1.231
hsa05164 Influenza A	0.0861465	7	1.78	P25685	3	1.65	Up	0.000140274	K	DnaJ homolog subfamily B member 1 OS=Homo sapiens OX=9606 GN=DNAJB1 PE=1 SV=4	DNAJB1	1	3.11133e-07	121.45	GK(1)DYYQTLGLAR	2	1.5419	1	0.756	0.693	0.722	1.25	1.15	1.182
hsa05164 Influenza A	0.0861465	7	1.78	P63261	50	2.044	Up	0.00151871	K	Actin, cytoplasmic 2 OS=Homo sapiens OX=9606 GN=ACTG1 PE=1 SV=1	ACTG1	1	1.73645e-08	74.364	HQGVMVGMGQK(1)DSYVGDEAQSK	3	-0.91047	1	0.53	0.605	0.719	1.328	1.267	1.194
hsa05164 Influenza A	0.0861465	7	1.78	Q92793	1811	7.596	Up	0.00094031	K	CREB-binding protein OS=Homo sapiens OX=9606 GN=CREBBP PE=1 SV=3	CREBBP	1	0.00377762	83.182	K(1)TNGGCPVCK	2	0.18561	1	0.185	0.196	0.228	1.546	1.535	1.545
hsa05212 Pancreatic cancer	0.731169	1	0.82	P15692	149	1.52	Up	0.0183197	K	Vascular endothelial growth factor A OS=Homo sapiens OX=9606 GN=VEGFA PE=1 SV=2	VEGFA	1	0.0158118	68.016	GK(1)GK(1)GQK(1)R	3	0.20842	1	0.619	0.836	0.835	1.054	1.197	1.23
hsa05212 Pancreatic cancer	0.731169	1	0.82	P15692	147	1.52	Up	0.0183197	K	Vascular endothelial growth factor A OS=Homo sapiens OX=9606 GN=VEGFA PE=1 SV=2	VEGFA	1	0.0158118	68.016	GK(1)GK(1)GQK(1)R	3	0.20842	1	0.619	0.836	0.835	1.054	1.197	1.23
hsa05212 Pancreatic cancer	0.731169	1	0.82	P15692	152	1.52	Up	0.0183197	K	Vascular endothelial growth factor A OS=Homo sapiens OX=9606 GN=VEGFA PE=1 SV=2	VEGFA	1	0.0158118	68.016	GK(1)GK(1)GQK(1)R	3	0.20842	1	0.619	0.836	0.835	1.054	1.197	1.23
hsa05163 Human cytomegalovirus infection	0.484442	4	1.12	P15692	149	1.52	Up	0.0183197	K	Vascular endothelial growth factor A OS=Homo sapiens OX=9606 GN=VEGFA PE=1 SV=2	VEGFA	1	0.0158118	68.016	GK(1)GK(1)GQK(1)R	3	0.20842	1	0.619	0.836	0.835	1.054	1.197	1.23
hsa05163 Human cytomegalovirus infection	0.484442	4	1.12	P15692	147	1.52	Up	0.0183197	K	Vascular endothelial growth factor A OS=Homo sapiens OX=9606 GN=VEGFA PE=1 SV=2	VEGFA	1	0.0158118	68.016	GK(1)GK(1)GQK(1)R	3	0.20842	1	0.619	0.836	0.835	1.054	1.197	1.23
hsa05163 Human cytomegalovirus infection	0.484442	4	1.12	P15692	152	1.52	Up	0.0183197	K	Vascular endothelial growth factor A OS=Homo sapiens OX=9606 GN=VEGFA PE=1 SV=2	VEGFA	1	0.0158118	68.016	GK(1)GK(1)GQK(1)R	3	0.20842	1	0.619	0.836	0.835	1.054	1.197	1.23
hsa05163 Human cytomegalovirus infection	0.484442	4	1.12	P36507	108	1.663	Up	0.0022007	K	Dual specificity mitogen-activated protein kinase kinase 2 OS=Homo sapiens OX=9606 GN=MAP2K2 PE=1 SV=1	MAP2K2	1	4.9811e-05	95.483	LIHLEIK(1)PAIR	3	-0.84799	1	0.79	0.663	0.705	1.236	1.078	1.275
hsa05163 Human cytomegalovirus infection	0.484442	4	1.12	P30101	494	1.633	Up	0.00061616	K	Protein disulfide-isomerase A3 OS=Homo sapiens OX=9606 GN=PDIA3 PE=1 SV=4	PDIA3	1	1.11552e-22	158.91	EATNPPVIQEEK(1)PK	2	-0.21724	3	0.713	0.703	0.767	1.119	1.287	1.158
hsa05163 Human cytomegalovirus infection	0.484442	4	1.12	Q15382	97	1.749	Up	0.000122954	K	GTP-binding protein Rheb OS=Homo sapiens OX=9606 GN=RHEB PE=1 SV=1	RHEB	1	0.0026732	65.842	SFEVIK(1)VIHGK	3	1.1424	1	0.669	0.666	0.743	1.19	1.244	1.201
hsa00970 Aminoacyl-tRNA biosynthesis	0.963385	1	0.33	P23381	256	1.711	Up	0.0030162	K	Tryptophan--tRNA ligase, cytoplasmic OS=Homo sapiens OX=9606 GN=WARS PE=1 SV=2	WARS	1	8.60127e-07	127.87	IQK(1)HVTFNQVK	3	1.0314	1	0.71	0.666	0.737	1.208	1.203	1.205
hsa03440 Homologous recombination	0.480722	1	1.63	P27694	163	2.076	Up	1.81648e-05	K	Replication protein A 70 kDa DNA-binding subunit OS=Homo sapiens OX=9606 GN=RPA1 PE=1 SV=2	RPA1	1	9.99335e-08	143.97	AYGASK(1)TFGK	3	1.1683	2	0.616	0.618	0.6	1.341	1.243	1.224
hsa05133 Pertussis	0.650049	1	1.02	P23528	92	1.643	Up	3.7006e-05	K	Cofilin-1 OS=Homo sapiens OX=9606 GN=CFL1 PE=1 SV=3	CFL1	1	1.70741e-10	121.99	YALYDATYETK(1)ESK	2	0.88008	2	0.714	0.743	0.716	1.144	1.227	1.2
hsa01210 2-Oxocarboxylic acid metabolism	0.398644	2	1.48	P17174	97	1.571	Up	0.0062823	K	Aspartate aminotransferase, cytoplasmic OS=Homo sapiens OX=9606 GN=GOT1 PE=1 SV=3	GOT1	1	0.000526115	69.03	LALGDDSPALK(1)EK	3	4.0464	1	0.768	0.717	0.76	1.092	1.374	1.06
hsa01210 2-Oxocarboxylic acid metabolism	0.398644	2	1.48	Q03154	129	1.551	Up	0.0089411	K	Aminoacylase-1 OS=Homo sapiens OX=9606 GN=ACY1 PE=1 SV=1	ACY1	1	0.0222707	60.682	LK(1)VEGHR	3	0.064875	1	0.786	0.786	0.693	1.171	1.171	1.172
hsa04657 IL-17 signaling pathway	0.731169	1	0.82	P14625	467	2.375	Up	0.00132479	K	Endoplasmin OS=Homo sapiens OX=9606 GN=HSP90B1 PE=1 SV=1	HSP90B1	1	0.0260932	82.287	K(1)TLDMIK	2	-1.9897	1	0.517	0.571	0.564	1.316	1.312	1.296
hsa04657 IL-17 signaling pathway	0.731169	1	0.82	P14625	473	1.531	Up	0.0021359	K	Endoplasmin OS=Homo sapiens OX=9606 GN=HSP90B1 PE=1 SV=1	HSP90B1	1	0.0291692	80.438	TLDMIK(1)K	3	-0.98878	2	0.833	0.741	0.715	1.239	1.084	1.181
hsa04120 Ubiquitin mediated proteolysis	0.580152	3	1.02	Q9UBE0	32	1.782	Up	0.00021626	K	SUMO-activating enzyme subunit 1 OS=Homo sapiens OX=9606 GN=SAE1 PE=1 SV=1	SAE1	1	0.0171974	70.056	LWGLEAQK(1)R	2	1.3447	1	0.634	0.717	0.701	1.245	1.252	1.16
hsa04120 Ubiquitin mediated proteolysis	0.580152	3	1.02	Q16531	191	1.804	Up	3.8213e-05	K	DNA damage-binding protein 1 OS=Homo sapiens OX=9606 GN=DDB1 PE=1 SV=1	DDB1	1	5.7889e-05	94.363	HVK(1)TYEVSLR	3	-1.2231	2	0.644	0.677	0.712	1.233	1.223	1.211
hsa04120 Ubiquitin mediated proteolysis	0.580152	3	1.02	Q05086	30	1.55	Up	0.0156587	K	Ubiquitin-protein ligase E3A OS=Homo sapiens OX=9606 GN=UBE3A PE=1 SV=4	UBE3A	1	0.00220051	77.662	AAAK(1)HLIER	3	0.43631	1	0.706	0.91	0.653	1.279	1.144	1.093
hsa00280 Valine, leucine and isoleucine degradation	0.952158	1	0.35	Q16836	301	1.579	Up	0.00090275	K	Hydroxyacyl-coenzyme A dehydrogenase, mitochondrial OS=Homo sapiens OX=9606 GN=HADH PE=1 SV=3	HADH	1	0.00585392	66.27	LVAENK(1)FGK	3	0.9182	1	0.745	0.808	0.684	1.199	1.132	1.202
hsa05216 Thyroid cancer	0.480722	1	1.63	P36507	108	1.663	Up	0.0022007	K	Dual specificity mitogen-activated protein kinase kinase 2 OS=Homo sapiens OX=9606 GN=MAP2K2 PE=1 SV=1	MAP2K2	1	4.9811e-05	95.483	LIHLEIK(1)PAIR	3	-0.84799	1	0.79	0.663	0.705	1.236	1.078	1.275
hsa00513 Various types of N-glycan biosynthesis	0.00216613	5	4.53	P04843	187	2.143	Up	1.58621e-05	K	Dolichyl-diphosphooligosaccharide--protein glycosyltransferase subunit 1 OS=Homo sapiens OX=9606 GN=RPN1 PE=1 SV=1	RPN1	1	1.75673e-17	156.17	NVESYTK(1)LGNPTR	2	-0.077266	1	0.57	0.614	0.604	1.244	1.32	1.267
hsa00513 Various types of N-glycan biosynthesis	0.00216613	5	4.53	P04844	442	1.522	Up	0.0020441	K	Dolichyl-diphosphooligosaccharide--protein glycosyltransferase subunit 2 OS=Homo sapiens OX=9606 GN=RPN2 PE=1 SV=3	RPN2	1	9.65183e-11	115.57	LHNQK(1)TGQEVVFVAEPDNK	3	-0.45133	1	0.74	0.848	0.707	1.198	1.112	1.182
hsa00513 Various types of N-glycan biosynthesis	0.00216613	5	4.53	P04844	311	1.701	Up	0.00068179	K	Dolichyl-diphosphooligosaccharide--protein glycosyltransferase subunit 2 OS=Homo sapiens OX=9606 GN=RPN2 PE=1 SV=3	RPN2	1	3.52812e-05	124.06	LEHAK(1)SVASR	2	-0.83563	2	0.647	0.769	0.706	1.219	1.246	1.144
hsa00513 Various types of N-glycan biosynthesis	0.00216613	5	4.53	P15291	348	1.811	Up	0.0005237	K	Beta-1,4-galactosyltransferase 1 OS=Homo sapiens OX=9606 GN=B4GALT1 PE=1 SV=5	B4GALT1	1	0.0295481	72.23	K(1)NEPNPQR	2	0.42742	1	0.751	0.632	0.648	1.279	1.22	1.18
hsa00513 Various types of N-glycan biosynthesis	0.00216613	5	4.53	P46977	440	1.518	Up	0.00032166	K	Dolichyl-diphosphooligosaccharide--protein glycosyltransferase subunit STT3A OS=Homo sapiens OX=9606 GN=STT3A PE=1 SV=2	STT3A	1	0.00938561	58.274	NLDISRPDK(1)K	3	-0.18069	1	0.801	0.738	0.761	1.186	1.102	1.203
hsa00513 Various types of N-glycan biosynthesis	0.00216613	5	4.53	Q8TCJ2	688	1.573	Up	0.00030171	K	Dolichyl-diphosphooligosaccharide--protein glycosyltransferase subunit STT3B OS=Homo sapiens OX=9606 GN=STT3B PE=1 SV=1	STT3B	1	0.000563873	81.625	IAEGEHPK(1)DIR	3	1.1943	1	0.753	0.725	0.767	1.259	1.124	1.148
hsa00513 Various types of N-glycan biosynthesis	0.00216613	5	4.53	Q8TCJ2	784	1.902	Up	1.014e-06	K	Dolichyl-diphosphooligosaccharide--protein glycosyltransferase subunit STT3B OS=Homo sapiens OX=9606 GN=STT3B PE=1 SV=1	STT3B	1	0.00186854	91.853	ETLDHK(1)PR	2	2.0478	2	0.65	0.638	0.668	1.235	1.226	1.259
hsa04350 TGF-beta signaling pathway	0.256052	2	2.04	Q09472	1769	4.035	Up	2.2499e-07	K	Histone acetyltransferase p300 OS=Homo sapiens OX=9606 GN=EP300 PE=1 SV=2	EP300	1	1.89332e-49	208.56	VVQHTK(1)GCK(1)R	2	0.47995	5	0.357	0.351	0.363	1.501	1.405	1.415
hsa04350 TGF-beta signaling pathway	0.256052	2	2.04	Q09472	1772	11.928	Up	3.2215e-07	K	Histone acetyltransferase p300 OS=Homo sapiens OX=9606 GN=EP300 PE=1 SV=2	EP300	1	1.89332e-49	208.56	VVQHTK(1)GCK(1)R	2	0.47995	3	0.123	0.136	0.141	1.65	1.565	1.556
hsa04350 TGF-beta signaling pathway	0.256052	2	2.04	Q09472	1762	7.585	Up	0.00119748	K	Histone acetyltransferase p300 OS=Homo sapiens OX=9606 GN=EP300 PE=1 SV=2	EP300	1	2.32223e-16	145.52	NANCSLPSCQK(1)MK(1)R	2	-1.3586	2	0.201	0.229	0.18	1.533	1.572	1.522
hsa04350 TGF-beta signaling pathway	0.256052	2	2.04	Q09472	1774	3.958	Up	0.0092049	K	Histone acetyltransferase p300 OS=Homo sapiens OX=9606 GN=EP300 PE=1 SV=2	EP300	1	0.000167046	115.33	K(1)TNGGCPICK	3	-1.4801	4	0.287	0.344	0.456	1.437	1.433	1.432
hsa04350 TGF-beta signaling pathway	0.256052	2	2.04	Q09472	1704	1.891	Up	5.0177e-07	K	Histone acetyltransferase p300 OS=Homo sapiens OX=9606 GN=EP300 PE=1 SV=2	EP300	1	2.47609e-10	80.688	NHDHK(1)MEK(1)LGLGLDDESNNQQAAATQSPGDSR	4	4.3749	6	0.642	0.664	0.659	1.234	1.257	1.224
hsa04350 TGF-beta signaling pathway	0.256052	2	2.04	Q09472	1760	1.885	Up	3.5127e-06	K	Histone acetyltransferase p300 OS=Homo sapiens OX=9606 GN=EP300 PE=1 SV=2	EP300	1	2.32223e-16	145.52	NANCSLPSCQK(1)MK(1)R	2	-1.3586	5	0.642	0.648	0.679	1.223	1.266	1.222
hsa04350 TGF-beta signaling pathway	0.256052	2	2.04	Q92793	1811	7.596	Up	0.00094031	K	CREB-binding protein OS=Homo sapiens OX=9606 GN=CREBBP PE=1 SV=3	CREBBP	1	0.00377762	83.182	K(1)TNGGCPVCK	2	0.18561	1	0.185	0.196	0.228	1.546	1.535	1.545
hsa00190 Oxidative phosphorylation	0.824415	3	0.7	P31040	250	1.834	Up	3.6211e-05	K	Succinate dehydrogenase [ubiquinone] flavoprotein subunit, mitochondrial OS=Homo sapiens OX=9606 GN=SDHA PE=1 SV=2	SDHA	1	4.99908e-10	121.48	AK(1)NTVVATGGYGR	2	-0.32717	1	0.651	0.652	0.705	1.211	1.212	1.26
hsa00190 Oxidative phosphorylation	0.824415	3	0.7	P48047	90	1.539	Up	3.6942e-05	K	ATP synthase subunit O, mitochondrial OS=Homo sapiens OX=9606 GN=ATP5PO PE=1 SV=1	ATP5PO	1	4.77131e-05	120.87	VK(1)SLNDITAK	3	-0.097512	2	0.786	0.739	0.752	1.171	1.146	1.188
hsa00190 Oxidative phosphorylation	0.824415	3	0.7	P47985	101	1.523	Up	0.031261	K	Cytochrome b-c1 complex subunit Rieske, mitochondrial OS=Homo sapiens OX=9606 GN=UQCRFS1 PE=1 SV=2	UQCRFS1	1	0.00038399	92.99	LEVLDSTK(1)SSR	2	-1.559	1	0.714	0.657	0.922	1.111	1.353	1.029
hsa04935 Growth hormone synthesis, secretion and action	0.311625	3	1.53	Q09472	1769	4.035	Up	2.2499e-07	K	Histone acetyltransferase p300 OS=Homo sapiens OX=9606 GN=EP300 PE=1 SV=2	EP300	1	1.89332e-49	208.56	VVQHTK(1)GCK(1)R	2	0.47995	5	0.357	0.351	0.363	1.501	1.405	1.415
hsa04935 Growth hormone synthesis, secretion and action	0.311625	3	1.53	Q09472	1772	11.928	Up	3.2215e-07	K	Histone acetyltransferase p300 OS=Homo sapiens OX=9606 GN=EP300 PE=1 SV=2	EP300	1	1.89332e-49	208.56	VVQHTK(1)GCK(1)R	2	0.47995	3	0.123	0.136	0.141	1.65	1.565	1.556
hsa04935 Growth hormone synthesis, secretion and action	0.311625	3	1.53	Q09472	1762	7.585	Up	0.00119748	K	Histone acetyltransferase p300 OS=Homo sapiens OX=9606 GN=EP300 PE=1 SV=2	EP300	1	2.32223e-16	145.52	NANCSLPSCQK(1)MK(1)R	2	-1.3586	2	0.201	0.229	0.18	1.533	1.572	1.522
hsa04935 Growth hormone synthesis, secretion and action	0.311625	3	1.53	Q09472	1774	3.958	Up	0.0092049	K	Histone acetyltransferase p300 OS=Homo sapiens OX=9606 GN=EP300 PE=1 SV=2	EP300	1	0.000167046	115.33	K(1)TNGGCPICK	3	-1.4801	4	0.287	0.344	0.456	1.437	1.433	1.432
hsa04935 Growth hormone synthesis, secretion and action	0.311625	3	1.53	Q09472	1704	1.891	Up	5.0177e-07	K	Histone acetyltransferase p300 OS=Homo sapiens OX=9606 GN=EP300 PE=1 SV=2	EP300	1	2.47609e-10	80.688	NHDHK(1)MEK(1)LGLGLDDESNNQQAAATQSPGDSR	4	4.3749	6	0.642	0.664	0.659	1.234	1.257	1.224
hsa04935 Growth hormone synthesis, secretion and action	0.311625	3	1.53	Q09472	1760	1.885	Up	3.5127e-06	K	Histone acetyltransferase p300 OS=Homo sapiens OX=9606 GN=EP300 PE=1 SV=2	EP300	1	2.32223e-16	145.52	NANCSLPSCQK(1)MK(1)R	2	-1.3586	5	0.642	0.648	0.679	1.223	1.266	1.222
hsa04935 Growth hormone synthesis, secretion and action	0.311625	3	1.53	P36507	108	1.663	Up	0.0022007	K	Dual specificity mitogen-activated protein kinase kinase 2 OS=Homo sapiens OX=9606 GN=MAP2K2 PE=1 SV=1	MAP2K2	1	4.9811e-05	95.483	LIHLEIK(1)PAIR	3	-0.84799	1	0.79	0.663	0.705	1.236	1.078	1.275
hsa04935 Growth hormone synthesis, secretion and action	0.311625	3	1.53	Q92793	1811	7.596	Up	0.00094031	K	CREB-binding protein OS=Homo sapiens OX=9606 GN=CREBBP PE=1 SV=3	CREBBP	1	0.00377762	83.182	K(1)TNGGCPVCK	2	0.18561	1	0.185	0.196	0.228	1.546	1.535	1.545
hsa00250 Alanine, aspartate and glutamate metabolism	0.398644	2	1.48	O94808	17	8.073	Up	1.7576e-06	K	Glutamine--fructose-6-phosphate aminotransferase [isomerizing] 2 OS=Homo sapiens OX=9606 GN=GFPT2 PE=1 SV=3	GFPT2	1	0.00410597	83.862	K(1)EIFETLIK	2	-0.77241	3	0.206	0.199	0.171	1.548	1.576	1.526
hsa00250 Alanine, aspartate and glutamate metabolism	0.398644	2	1.48	P17174	97	1.571	Up	0.0062823	K	Aspartate aminotransferase, cytoplasmic OS=Homo sapiens OX=9606 GN=GOT1 PE=1 SV=3	GOT1	1	0.000526115	69.03	LALGDDSPALK(1)EK	3	4.0464	1	0.768	0.717	0.76	1.092	1.374	1.06
hsa04260 Cardiac muscle contraction	0.398644	2	1.48	Q12797	336	1.771	Up	0.0099388	K	Aspartyl/asparaginyl beta-hydroxylase OS=Homo sapiens OX=9606 GN=ASPH PE=1 SV=3	ASPH	1	0.0197409	87.476	LLNK(1)FDK	2	2.2137	1	0.759	0.622	0.682	1.221	1.227	1.206
hsa04260 Cardiac muscle contraction	0.398644	2	1.48	P47985	101	1.523	Up	0.031261	K	Cytochrome b-c1 complex subunit Rieske, mitochondrial OS=Homo sapiens OX=9606 GN=UQCRFS1 PE=1 SV=2	UQCRFS1	1	0.00038399	92.99	LEVLDSTK(1)SSR	2	-1.559	1	0.714	0.657	0.922	1.111	1.353	1.029
hsa05410 Hypertrophic cardiomyopathy (HCM)	0.0100008	5	3.4	P18564	548	1.991	Up	0.0032991	K	Integrin beta-6 OS=Homo sapiens OX=9606 GN=ITGB6 PE=1 SV=2	ITGB6	1	9.92231e-07	77.037	HK(1)GLLCGGNGDCDCGECVCR	3	-0.47256	1	0.5	0.688	0.699	1.2	1.299	1.258
hsa05410 Hypertrophic cardiomyopathy (HCM)	0.0100008	5	3.4	P23229	144	3.768	Up	1.57151e-05	K	Integrin alpha-6 OS=Homo sapiens OX=9606 GN=ITGA6 PE=1 SV=5	ITGA6	1	3.1719e-06	130.01	QHVNTK(1)QESR	2	1.0391	2	0.354	0.398	0.382	1.474	1.325	1.474
hsa05410 Hypertrophic cardiomyopathy (HCM)	0.0100008	5	3.4	P23229	594	2.852	Up	0.0097615	K	Integrin alpha-6 OS=Homo sapiens OX=9606 GN=ITGA6 PE=1 SV=5	ITGA6	1	0.0014851	102.53	YTQELTLK(1)R	2	0.55207	2	0.382	0.524	0.521	1.331	1.345	1.394
hsa05410 Hypertrophic cardiomyopathy (HCM)	0.0100008	5	3.4	P63261	50	2.044	Up	0.00151871	K	Actin, cytoplasmic 2 OS=Homo sapiens OX=9606 GN=ACTG1 PE=1 SV=1	ACTG1	1	1.73645e-08	74.364	HQGVMVGMGQK(1)DSYVGDEAQSK	3	-0.91047	1	0.53	0.605	0.719	1.328	1.267	1.194
hsa05410 Hypertrophic cardiomyopathy (HCM)	0.0100008	5	3.4	P24043	3092	1.918	Up	1.50302e-05	K	Laminin subunit alpha-2 OS=Homo sapiens OX=9606 GN=LAMA2 PE=1 SV=4	LAMA2	1	0.0350388	67.385	GCIRSLK(1)LTK	2	3.4243	1	0.661	0.626	0.658	1.283	1.221	1.227
hsa05410 Hypertrophic cardiomyopathy (HCM)	0.0100008	5	3.4	P17301	261	4.97	Up	7.7205e-05	K	Integrin alpha-2 OS=Homo sapiens OX=9606 GN=ITGA2 PE=1 SV=1	ITGA2	1	5.75495e-08	138.89	K(1)YAYSAASGGR	2	-0.52946	1	0.253	0.307	0.334	1.631	1.406	1.406
hsa03410 Base excision repair	0.207923	2	2.33	P09429	90	1.761	Up	0.000121985	K	High mobility group protein B1 OS=Homo sapiens OX=9606 GN=HMGB1 PE=1 SV=3	HMGB1	1	0.014499	80.688	FK(1)DPNAPK	2	-0.291	2	0.677	0.691	0.704	1.289	1.223	1.136
hsa03410 Base excision repair	0.207923	2	2.33	P39748	375	1.672	Up	0.00041838	K	Flap endonuclease 1 OS=Homo sapiens OX=9606 GN=FEN1 PE=1 SV=1	FEN1	1	0.00781029	71.379	TGAAGK(1)FK	3	0.36582	1	0.705	0.708	0.735	1.166	1.305	1.121
hsa00980 Metabolism of xenobiotics by cytochrome P450	0.486669	2	1.25	P47895	423	1.504	Up	1.81114e-05	K	Aldehyde dehydrogenase family 1 member A3 OS=Homo sapiens OX=9606 GN=ALDH1A3 PE=1 SV=2	ALDH1A3	1	3.01099e-05	135.99	FK(1)SIEEVIK	2	-0.13248	1	0.763	0.772	0.78	1.196	1.14	1.145
hsa00980 Metabolism of xenobiotics by cytochrome P450	0.486669	2	1.25	Q04828	207	2.087	Up	2.0691e-05	K	Aldo-keto reductase family 1 member C1 OS=Homo sapiens OX=9606 GN=AKR1C1 PE=1 SV=1	AKR1C1	1	0.00529129	96.342	LLDFCK(1)SK	3	0.41295	2	0.638	0.613	0.575	1.289	1.244	1.277
hsa00980 Metabolism of xenobiotics by cytochrome P450	0.486669	2	1.25	Q04828	270	2.181	Up	2.1767e-06	K	Aldo-keto reductase family 1 member C1 OS=Homo sapiens OX=9606 GN=AKR1C1 PE=1 SV=1	AKR1C1	1	1.43268e-36	194.86	GVVVLAK(1)SYNEQR	2	-0.46789	2	0.574	0.577	0.614	1.299	1.284	1.267
hsa00533 Glycosaminoglycan biosynthesis - keratan sulfate	0.122625	1	8.15	P15291	348	1.811	Up	0.0005237	K	Beta-1,4-galactosyltransferase 1 OS=Homo sapiens OX=9606 GN=B4GALT1 PE=1 SV=5	B4GALT1	1	0.0295481	72.23	K(1)NEPNPQR	2	0.42742	1	0.751	0.632	0.648	1.279	1.22	1.18
hsa04971 Gastric acid secretion	0.486669	2	1.25	Q13557	268	2.448	Up	0.00064196	K	Calcium/calmodulin-dependent protein kinase type II subunit delta OS=Homo sapiens OX=9606 GN=CAMK2D PE=1 SV=3	CAMK2D	1	9.73432e-06	94.09	ITASEALK(1)HPWICQR	3	-2.1026	1	0.448	0.594	0.572	1.394	1.259	1.298
hsa04971 Gastric acid secretion	0.486669	2	1.25	P04920	893	4.44	Up	4.2628e-05	K	Anion exchange protein 2 OS=Homo sapiens OX=9606 GN=SLC4A2 PE=1 SV=4	SLC4A2	1	2.23352e-06	112.42	SLAGQSGQGK(1)PR	2	-2.3535	1	0.287	0.375	0.323	1.476	1.415	1.482
hsa04915 Estrogen signaling pathway	0.750457	2	0.78	P36507	108	1.663	Up	0.0022007	K	Dual specificity mitogen-activated protein kinase kinase 2 OS=Homo sapiens OX=9606 GN=MAP2K2 PE=1 SV=1	MAP2K2	1	4.9811e-05	95.483	LIHLEIK(1)PAIR	3	-0.84799	1	0.79	0.663	0.705	1.236	1.078	1.275
hsa04915 Estrogen signaling pathway	0.750457	2	0.78	P14625	467	2.375	Up	0.00132479	K	Endoplasmin OS=Homo sapiens OX=9606 GN=HSP90B1 PE=1 SV=1	HSP90B1	1	0.0260932	82.287	K(1)TLDMIK	2	-1.9897	1	0.517	0.571	0.564	1.316	1.312	1.296
hsa04915 Estrogen signaling pathway	0.750457	2	0.78	P14625	473	1.531	Up	0.0021359	K	Endoplasmin OS=Homo sapiens OX=9606 GN=HSP90B1 PE=1 SV=1	HSP90B1	1	0.0291692	80.438	TLDMIK(1)K	3	-0.98878	2	0.833	0.741	0.715	1.239	1.084	1.181
hsa04931 Insulin resistance	0.793587	1	0.68	O94808	17	8.073	Up	1.7576e-06	K	Glutamine--fructose-6-phosphate aminotransferase [isomerizing] 2 OS=Homo sapiens OX=9606 GN=GFPT2 PE=1 SV=3	GFPT2	1	0.00410597	83.862	K(1)EIFETLIK	2	-0.77241	3	0.206	0.199	0.171	1.548	1.576	1.526
hsa05214 Glioma	0.304359	2	1.81	P36507	108	1.663	Up	0.0022007	K	Dual specificity mitogen-activated protein kinase kinase 2 OS=Homo sapiens OX=9606 GN=MAP2K2 PE=1 SV=1	MAP2K2	1	4.9811e-05	95.483	LIHLEIK(1)PAIR	3	-0.84799	1	0.79	0.663	0.705	1.236	1.078	1.275
hsa05214 Glioma	0.304359	2	1.81	Q13557	268	2.448	Up	0.00064196	K	Calcium/calmodulin-dependent protein kinase type II subunit delta OS=Homo sapiens OX=9606 GN=CAMK2D PE=1 SV=3	CAMK2D	1	9.73432e-06	94.09	ITASEALK(1)HPWICQR	3	-2.1026	1	0.448	0.594	0.572	1.394	1.259	1.298
hsa05152 Tuberculosis	0.518479	3	1.11	Q09472	1769	4.035	Up	2.2499e-07	K	Histone acetyltransferase p300 OS=Homo sapiens OX=9606 GN=EP300 PE=1 SV=2	EP300	1	1.89332e-49	208.56	VVQHTK(1)GCK(1)R	2	0.47995	5	0.357	0.351	0.363	1.501	1.405	1.415
hsa05152 Tuberculosis	0.518479	3	1.11	Q09472	1772	11.928	Up	3.2215e-07	K	Histone acetyltransferase p300 OS=Homo sapiens OX=9606 GN=EP300 PE=1 SV=2	EP300	1	1.89332e-49	208.56	VVQHTK(1)GCK(1)R	2	0.47995	3	0.123	0.136	0.141	1.65	1.565	1.556
hsa05152 Tuberculosis	0.518479	3	1.11	Q09472	1762	7.585	Up	0.00119748	K	Histone acetyltransferase p300 OS=Homo sapiens OX=9606 GN=EP300 PE=1 SV=2	EP300	1	2.32223e-16	145.52	NANCSLPSCQK(1)MK(1)R	2	-1.3586	2	0.201	0.229	0.18	1.533	1.572	1.522
hsa05152 Tuberculosis	0.518479	3	1.11	Q09472	1774	3.958	Up	0.0092049	K	Histone acetyltransferase p300 OS=Homo sapiens OX=9606 GN=EP300 PE=1 SV=2	EP300	1	0.000167046	115.33	K(1)TNGGCPICK	3	-1.4801	4	0.287	0.344	0.456	1.437	1.433	1.432
hsa05152 Tuberculosis	0.518479	3	1.11	Q09472	1704	1.891	Up	5.0177e-07	K	Histone acetyltransferase p300 OS=Homo sapiens OX=9606 GN=EP300 PE=1 SV=2	EP300	1	2.47609e-10	80.688	NHDHK(1)MEK(1)LGLGLDDESNNQQAAATQSPGDSR	4	4.3749	6	0.642	0.664	0.659	1.234	1.257	1.224
hsa05152 Tuberculosis	0.518479	3	1.11	Q09472	1760	1.885	Up	3.5127e-06	K	Histone acetyltransferase p300 OS=Homo sapiens OX=9606 GN=EP300 PE=1 SV=2	EP300	1	2.32223e-16	145.52	NANCSLPSCQK(1)MK(1)R	2	-1.3586	5	0.642	0.648	0.679	1.223	1.266	1.222
hsa05152 Tuberculosis	0.518479	3	1.11	Q13557	268	2.448	Up	0.00064196	K	Calcium/calmodulin-dependent protein kinase type II subunit delta OS=Homo sapiens OX=9606 GN=CAMK2D PE=1 SV=3	CAMK2D	1	9.73432e-06	94.09	ITASEALK(1)HPWICQR	3	-2.1026	1	0.448	0.594	0.572	1.394	1.259	1.298
hsa05152 Tuberculosis	0.518479	3	1.11	Q92793	1811	7.596	Up	0.00094031	K	CREB-binding protein OS=Homo sapiens OX=9606 GN=CREBBP PE=1 SV=3	CREBBP	1	0.00377762	83.182	K(1)TNGGCPVCK	2	0.18561	1	0.185	0.196	0.228	1.546	1.535	1.545
hsa04610 Complement and coagulation cascades	0.000984843	4	6.52	P00740	446	2.291	Up	0.0032782	K	Coagulation factor IX OS=Homo sapiens OX=9606 GN=F9 PE=1 SV=2	F9	1	0.00440376	82.008	YGIYTK(1)VSR	2	-0.90947	1	0.619	0.527	0.554	1.289	1.3	1.305
hsa04610 Complement and coagulation cascades	0.000984843	4	6.52	P13726	233	2.168	Up	0.00033987	K	Tissue factor OS=Homo sapiens OX=9606 GN=F3 PE=1 SV=1	F3	1	2.77667e-05	95.57	K(1)STDSPVECMGQEK	3	2.065	1	0.588	0.527	0.659	1.34	1.252	1.254
hsa04610 Complement and coagulation cascades	0.000984843	4	6.52	P13987	90	2.086	Up	2.1035e-06	K	CD59 glycoprotein OS=Homo sapiens OX=9606 GN=CD59 PE=1 SV=1	CD59	1	3.9152e-08	141.13	ENELTYYCCK(1)K	2	-0.33008	2	0.61	0.612	0.605	1.303	1.29	1.218
hsa04610 Complement and coagulation cascades	0.000984843	4	6.52	P13987	66	1.753	Up	0.00061964	K	CD59 glycoprotein OS=Homo sapiens OX=9606 GN=CD59 PE=1 SV=1	CD59	1	4.46545e-17	135.72	CWK(1)FEHCNFNDVTTR	3	-2.6005	1	0.661	0.66	0.756	1.253	1.26	1.128
hsa04610 Complement and coagulation cascades	0.000984843	4	6.52	P08174	161	4.927	Up	1.8954e-06	K	Complement decay-accelerating factor OS=Homo sapiens OX=9606 GN=CD55 PE=1 SV=4	CD55	1	0.000511591	92.611	K(1)SCPNPGEIR	2	-0.92109	3	0.289	0.285	0.326	1.505	1.493	1.436
hsa04664 Fc epsilon RI signaling pathway	0.731169	1	0.82	P36507	108	1.663	Up	0.0022007	K	Dual specificity mitogen-activated protein kinase kinase 2 OS=Homo sapiens OX=9606 GN=MAP2K2 PE=1 SV=1	MAP2K2	1	4.9811e-05	95.483	LIHLEIK(1)PAIR	3	-0.84799	1	0.79	0.663	0.705	1.236	1.078	1.275
hsa04020 Calcium signaling pathway	0.382822	3	1.36	Q12797	336	1.771	Up	0.0099388	K	Aspartyl/asparaginyl beta-hydroxylase OS=Homo sapiens OX=9606 GN=ASPH PE=1 SV=3	ASPH	1	0.0197409	87.476	LLNK(1)FDK	2	2.2137	1	0.759	0.622	0.682	1.221	1.227	1.206
hsa04020 Calcium signaling pathway	0.382822	3	1.36	P21796	61	1.877	Up	2.673e-06	K	Voltage-dependent anion-selective channel protein 1 OS=Homo sapiens OX=9606 GN=VDAC1 PE=1 SV=2	VDAC1	1	0.00011548	117.25	VTGSLETK(1)YR	3	1.0352	3	0.663	0.636	0.677	1.244	1.244	1.221
hsa04020 Calcium signaling pathway	0.382822	3	1.36	P21796	20	1.506	Up	6.0692e-05	K	Voltage-dependent anion-selective channel protein 1 OS=Homo sapiens OX=9606 GN=VDAC1 PE=1 SV=2	VDAC1	1	5.63016e-11	131.66	DVFTK(1)GYGFGLIK	2	0.76596	2	0.765	0.794	0.754	1.198	1.157	1.128
hsa04020 Calcium signaling pathway	0.382822	3	1.36	Q13557	268	2.448	Up	0.00064196	K	Calcium/calmodulin-dependent protein kinase type II subunit delta OS=Homo sapiens OX=9606 GN=CAMK2D PE=1 SV=3	CAMK2D	1	9.73432e-06	94.09	ITASEALK(1)HPWICQR	3	-2.1026	1	0.448	0.594	0.572	1.394	1.259	1.298
hsa04540 Gap junction	0.84159	1	0.58	P36507	108	1.663	Up	0.0022007	K	Dual specificity mitogen-activated protein kinase kinase 2 OS=Homo sapiens OX=9606 GN=MAP2K2 PE=1 SV=1	MAP2K2	1	4.9811e-05	95.483	LIHLEIK(1)PAIR	3	-0.84799	1	0.79	0.663	0.705	1.236	1.078	1.275
hsa05202 Transcriptional misregulation in cancer	0.311625	3	1.53	Q5H9B9	227	5.823	Up	0.0030237	K	Putative BMP-2-inducible kinase-like protein OS=Homo sapiens OX=9606 GN=BMP2KL PE=5 SV=2	BMP2KL	1	0.0168939	57.59	SLQK(1)LSSR	3	3.5695	1	0.177	0.324	0.271	1.041	2.103	1.351
hsa05202 Transcriptional misregulation in cancer	0.311625	3	1.53	Q71DI3	19	1.533	Up	0.034541	K	Histone H3.2 OS=Homo sapiens OX=9606 GN=HIST2H3A PE=1 SV=3	HIST2H3A	1	2.45577e-18	167.09	STGGK(1)APRK(1)QLATK(1)AAR	2	0.22427	41	0.669	0.886	0.726	1.238	0.937	1.322
hsa05202 Transcriptional misregulation in cancer	0.311625	3	1.53	Q71DI3	10	1.777	Up	3.3362e-06	K	Histone H3.2 OS=Homo sapiens OX=9606 GN=HIST2H3A PE=1 SV=3	HIST2H3A	1	0.00024356	111.61	QTARK(1)STGGK(1)APR	2	0.94869	19	0.696	0.688	0.673	1.253	1.186	1.216
hsa05202 Transcriptional misregulation in cancer	0.311625	3	1.53	P17844	33	1.57	Up	2.1671e-06	K	Probable ATP-dependent RNA helicase DDX5 OS=Homo sapiens OX=9606 GN=DDX5 PE=1 SV=1	DDX5	1	0.0114461	85.533	K(1)FGNPGEK	2	0.64993	1	0.756	0.73	0.76	1.172	1.17	1.184
hsa05202 Transcriptional misregulation in cancer	0.311625	3	1.53	P17844	45	1.709	Up	0.00047944	K	Probable ATP-dependent RNA helicase DDX5 OS=Homo sapiens OX=9606 GN=DDX5 PE=1 SV=1	DDX5	1	0.0064221	68.657	K(1)WNLDELPK	3	0.20029	1	0.715	0.73	0.671	1.179	1.31	1.127
hsa00860 Porphyrin and chlorophyll metabolism	0.6008	1	1.16	P13196	211	4.276	Up	0.0127581	K	5-aminolevulinate synthase, nonspecific, mitochondrial OS=Homo sapiens OX=9606 GN=ALAS1 PE=1 SV=2	ALAS1	1	0.00116209	113.41	K(1)NDHTYR	3	-0.80736	1	0.461	0.284	0.275	1.49	1.49	1.382
hsa05100 Bacterial invasion of epithelial cells	0.0746663	7	1.84	Q92599	193	1.513	Up	0.0052044	K	Septin-8 OS=Homo sapiens OX=9606 GN=SEPTIN8 PE=1 SV=4	SEPTIN8	1	0.000500407	83.182	ADTISK(1)SELHK	3	0.34589	1	0.772	0.672	0.86	1.196	1.105	1.186
hsa05100 Bacterial invasion of epithelial cells	0.0746663	7	1.84	Q14185	641	2.953	Up	0.001995	K	Dedicator of cytokinesis protein 1 OS=Homo sapiens OX=9606 GN=DOCK1 PE=1 SV=2	DOCK1	1	0.0385614	45.28	QLMK(1)VDGGEVVK	2	-2.6314	1	0.509	0.442	0.439	1.378	1.372	1.355
hsa05100 Bacterial invasion of epithelial cells	0.0746663	7	1.84	P63261	50	2.044	Up	0.00151871	K	Actin, cytoplasmic 2 OS=Homo sapiens OX=9606 GN=ACTG1 PE=1 SV=1	ACTG1	1	1.73645e-08	74.364	HQGVMVGMGQK(1)DSYVGDEAQSK	3	-0.91047	1	0.53	0.605	0.719	1.328	1.267	1.194
hsa05100 Bacterial invasion of epithelial cells	0.0746663	7	1.84	P35221	881	1.511	Up	0.00040268	K	Catenin alpha-1 OS=Homo sapiens OX=9606 GN=CTNNA1 PE=1 SV=1	CTNNA1	1	0.00164808	73.927	EKQDETQTK(1)IK	3	0.98541	1	0.774	0.811	0.723	1.193	1.172	1.122
hsa05100 Bacterial invasion of epithelial cells	0.0746663	7	1.84	P59998	89	1.616	Up	1.98346e-05	K	Actin-related protein 2/3 complex subunit 4 OS=Homo sapiens OX=9606 GN=ARPC4 PE=1 SV=3	ARPC4	1	0.00095295	104.75	ILCHK(1)FMR	3	-0.82501	1	0.745	0.733	0.723	1.215	1.143	1.199
hsa05100 Bacterial invasion of epithelial cells	0.0746663	7	1.84	Q03135	57	1.523	Up	0.0012176	K	Caveolin-1 OS=Homo sapiens OX=9606 GN=CAV1 PE=1 SV=4	CAV1	1	0.00201216	67.997	DPK(1)HLNDDVVK	3	1.0261	1	0.694	0.781	0.816	1.145	1.139	1.206
hsa05100 Bacterial invasion of epithelial cells	0.0746663	7	1.84	Q14247	161	1.788	Up	3.79e-05	K	Src substrate cortactin OS=Homo sapiens OX=9606 GN=CTTN PE=1 SV=2	CTTN	1	5.64477e-17	133.78	DYSSGFGGK(1)YGVQADR	2	0.1629	2	0.677	0.659	0.712	1.252	1.23	1.179
hsa05100 Bacterial invasion of epithelial cells	0.0746663	7	1.84	Q14247	198	1.588	Up	0.00024373	K	Src substrate cortactin OS=Homo sapiens OX=9606 GN=CTTN PE=1 SV=2	CTTN	1	6.55628e-07	113.24	GFGGK(1)YGIDK	3	-0.15514	2	0.734	0.77	0.724	1.251	1.119	1.169
hsa05020 Prion diseases	0.0273019	3	4.08	P31948	169	1.725	Up	0.00034403	K	Stress-induced-phosphoprotein 1 OS=Homo sapiens OX=9606 GN=STIP1 PE=1 SV=1	STIP1	0.99982	0.000892419	63.185	NKPSDLGTK(1)LQDPR	3	-3.3261	1	0.667	0.685	0.75	1.286	1.154	1.185
hsa05020 Prion diseases	0.0273019	3	4.08	P31948	325	1.713	Up	3.6441e-05	K	Stress-induced-phosphoprotein 1 OS=Homo sapiens OX=9606 GN=STIP1 PE=1 SV=1	STIP1	1	0.0105559	44.807	DAIHFYNK(1)SLAEHR	3	0.066022	1	0.731	0.681	0.7	1.215	1.169	1.234
hsa05020 Prion diseases	0.0273019	3	4.08	P36507	108	1.663	Up	0.0022007	K	Dual specificity mitogen-activated protein kinase kinase 2 OS=Homo sapiens OX=9606 GN=MAP2K2 PE=1 SV=1	MAP2K2	1	4.9811e-05	95.483	LIHLEIK(1)PAIR	3	-0.84799	1	0.79	0.663	0.705	1.236	1.078	1.275
hsa05020 Prion diseases	0.0273019	3	4.08	P11021	553	1.584	Up	0.00051646	K	Endoplasmic reticulum chaperone BiP OS=Homo sapiens OX=9606 GN=HSPA5 PE=1 SV=2	HSPA5	1	0.0198462	68.915	FAEEDK(1)K	3	0.25072	1	0.739	0.758	0.737	1.273	1.094	1.171
hsa05020 Prion diseases	0.0273019	3	4.08	P11021	352	1.593	Up	7.6558e-05	K	Endoplasmic reticulum chaperone BiP OS=Homo sapiens OX=9606 GN=HSPA5 PE=1 SV=2	HSPA5	1	0.000769989	104.22	VLEDSDLK(1)K	3	2.7364	2	0.731	0.73	0.76	1.123	1.214	1.2
hsa00520 Amino sugar and nucleotide sugar metabolism	0.928612	1	0.41	O94808	17	8.073	Up	1.7576e-06	K	Glutamine--fructose-6-phosphate aminotransferase [isomerizing] 2 OS=Homo sapiens OX=9606 GN=GFPT2 PE=1 SV=3	GFPT2	1	0.00410597	83.862	K(1)EIFETLIK	2	-0.77241	3	0.206	0.199	0.171	1.548	1.576	1.526
hsa00220 Arginine biosynthesis	0.116406	2	3.26	P17174	97	1.571	Up	0.0062823	K	Aspartate aminotransferase, cytoplasmic OS=Homo sapiens OX=9606 GN=GOT1 PE=1 SV=3	GOT1	1	0.000526115	69.03	LALGDDSPALK(1)EK	3	4.0464	1	0.768	0.717	0.76	1.092	1.374	1.06
hsa00220 Arginine biosynthesis	0.116406	2	3.26	Q03154	129	1.551	Up	0.0089411	K	Aminoacylase-1 OS=Homo sapiens OX=9606 GN=ACY1 PE=1 SV=1	ACY1	1	0.0222707	60.682	LK(1)VEGHR	3	0.064875	1	0.786	0.786	0.693	1.171	1.171	1.172
hsa04068 FoxO signaling pathway	0.311625	3	1.53	Q09472	1769	4.035	Up	2.2499e-07	K	Histone acetyltransferase p300 OS=Homo sapiens OX=9606 GN=EP300 PE=1 SV=2	EP300	1	1.89332e-49	208.56	VVQHTK(1)GCK(1)R	2	0.47995	5	0.357	0.351	0.363	1.501	1.405	1.415
hsa04068 FoxO signaling pathway	0.311625	3	1.53	Q09472	1772	11.928	Up	3.2215e-07	K	Histone acetyltransferase p300 OS=Homo sapiens OX=9606 GN=EP300 PE=1 SV=2	EP300	1	1.89332e-49	208.56	VVQHTK(1)GCK(1)R	2	0.47995	3	0.123	0.136	0.141	1.65	1.565	1.556
hsa04068 FoxO signaling pathway	0.311625	3	1.53	Q09472	1762	7.585	Up	0.00119748	K	Histone acetyltransferase p300 OS=Homo sapiens OX=9606 GN=EP300 PE=1 SV=2	EP300	1	2.32223e-16	145.52	NANCSLPSCQK(1)MK(1)R	2	-1.3586	2	0.201	0.229	0.18	1.533	1.572	1.522
hsa04068 FoxO signaling pathway	0.311625	3	1.53	Q09472	1774	3.958	Up	0.0092049	K	Histone acetyltransferase p300 OS=Homo sapiens OX=9606 GN=EP300 PE=1 SV=2	EP300	1	0.000167046	115.33	K(1)TNGGCPICK	3	-1.4801	4	0.287	0.344	0.456	1.437	1.433	1.432
hsa04068 FoxO signaling pathway	0.311625	3	1.53	Q09472	1704	1.891	Up	5.0177e-07	K	Histone acetyltransferase p300 OS=Homo sapiens OX=9606 GN=EP300 PE=1 SV=2	EP300	1	2.47609e-10	80.688	NHDHK(1)MEK(1)LGLGLDDESNNQQAAATQSPGDSR	4	4.3749	6	0.642	0.664	0.659	1.234	1.257	1.224
hsa04068 FoxO signaling pathway	0.311625	3	1.53	Q09472	1760	1.885	Up	3.5127e-06	K	Histone acetyltransferase p300 OS=Homo sapiens OX=9606 GN=EP300 PE=1 SV=2	EP300	1	2.32223e-16	145.52	NANCSLPSCQK(1)MK(1)R	2	-1.3586	5	0.642	0.648	0.679	1.223	1.266	1.222
hsa04068 FoxO signaling pathway	0.311625	3	1.53	P36507	108	1.663	Up	0.0022007	K	Dual specificity mitogen-activated protein kinase kinase 2 OS=Homo sapiens OX=9606 GN=MAP2K2 PE=1 SV=1	MAP2K2	1	4.9811e-05	95.483	LIHLEIK(1)PAIR	3	-0.84799	1	0.79	0.663	0.705	1.236	1.078	1.275
hsa04068 FoxO signaling pathway	0.311625	3	1.53	Q92793	1811	7.596	Up	0.00094031	K	CREB-binding protein OS=Homo sapiens OX=9606 GN=CREBBP PE=1 SV=3	CREBBP	1	0.00377762	83.182	K(1)TNGGCPVCK	2	0.18561	1	0.185	0.196	0.228	1.546	1.535	1.545
hsa03010 Ribosome	0.0319392	17	1.58	P18124	223	1.556	Up	0.00049647	K	60S ribosomal protein L7 OS=Homo sapiens OX=9606 GN=RPL7 PE=1 SV=1	RPL7	1	2.59475e-29	179.94	K(1)TTHFVEGGDAGNREDQINR	3	-0.098351	4	0.789	0.778	0.693	1.183	1.144	1.19
hsa03010 Ribosome	0.0319392	17	1.58	P09001	235	2.005	Up	0.00074339	K	39S ribosomal protein L3, mitochondrial OS=Homo sapiens OX=9606 GN=MRPL3 PE=1 SV=1	MRPL3	1	7.32746e-11	124.42	GQPATHGQTK(1)THR	3	-0.88038	2	0.604	0.565	0.712	1.324	1.19	1.258
hsa03010 Ribosome	0.0319392	17	1.58	P61254	134	1.568	Up	0.00037638	K	60S ribosomal protein L26 OS=Homo sapiens OX=9606 GN=RPL26 PE=1 SV=1	RPL26	0.995798	0.000775493	81.92	GK(0.996)YK(0.004)EETIEK	3	0.22442	1	0.805	0.735	0.71	1.213	1.158	1.157
hsa03010 Ribosome	0.0319392	17	1.58	P15880	275	3.946	Up	0.020878	K	40S ribosomal protein S2 OS=Homo sapiens OX=9606 GN=RPS2 PE=1 SV=2	RPS2	1	0.00013314	66.289	SPYQEFTDHLVK(1)THTR	4	-0.31731	1		0.19	0.445	1.296	1.113	1.35
hsa03010 Ribosome	0.0319392	17	1.58	P62263	106	4.268	Up	8.5519e-07	K	40S ribosomal protein S14 OS=Homo sapiens OX=9606 GN=RPS14 PE=1 SV=3	RPS14	1	0.000851749	84.173	TK(1)TPGPGAQSALR	2	-2.5539	1	0.322	0.351	0.346	1.465	1.393	1.491
hsa03010 Ribosome	0.0319392	17	1.58	P62263	96	1.537	Up	0.0272	K	40S ribosomal protein S14 OS=Homo sapiens OX=9606 GN=RPS14 PE=1 SV=3	RPS14	1	7.38528e-07	110.08	ELGITALHIK(1)LR	3	0.52572	2	0.692	0.795	0.788	0.974	1.432	1.09
hsa03010 Ribosome	0.0319392	17	1.58	P62917	46	1.894	Up	1.75293e-05	K	60S ribosomal protein L8 OS=Homo sapiens OX=9606 GN=RPL8 PE=1 SV=2	RPL8	1	0.000128202	96.464	GIVK(1)DIIHDPGR	2	-0.25301	2	0.668	0.643	0.653	1.287	1.189	1.244
hsa03010 Ribosome	0.0319392	17	1.58	P62753	243	1.631	Up	0.000121433	K	40S ribosomal protein S6 OS=Homo sapiens OX=9606 GN=RPS6 PE=1 SV=1	RPS6	1	1.94239e-06	121.29	ASTSK(1)SESSQK	2	0.72863	2	0.736	0.685	0.766	1.194	1.197	1.175
hsa03010 Ribosome	0.0319392	17	1.58	Q02878	192	1.535	Up	0.00026491	K	60S ribosomal protein L6 OS=Homo sapiens OX=9606 GN=RPL6 PE=1 SV=3	RPL6	1	0.000693341	75.589	THQK(1)FVIATSTK	3	-0.46954	1	0.74	0.814	0.728	1.184	1.162	1.156
hsa03010 Ribosome	0.0319392	17	1.58	P46777	27	1.597	Up	0.00119775	K	60S ribosomal protein L5 OS=Homo sapiens OX=9606 GN=RPL5 PE=1 SV=3	RPL5	1	0.0161426	70.412	EGK(1)TDYYAR	2	-0.47447	2	0.68	0.764	0.777	1.268	1.167	1.111
hsa03010 Ribosome	0.0319392	17	1.58	Q9Y2R5	78	1.614	Up	0.0103974	K	28S ribosomal protein S17, mitochondrial OS=Homo sapiens OX=9606 GN=MRPS17 PE=1 SV=1	MRPS17	1	0.0111073	46.88	HVK(1)HELAEIVFK	4	-0.81694	1	0.698	0.883	0.619	1.135	1.24	1.176
hsa03010 Ribosome	0.0319392	17	1.58	P61313	14	2.205	Up	0.0066215	K	60S ribosomal protein L15 OS=Homo sapiens OX=9606 GN=RPL15 PE=1 SV=2	RPL15	1	0.0353652	47.082	K(1)QSDVMR	2	-0.43104	1	0.66	0.558	0.534	1.303	1.291	1.269
hsa03010 Ribosome	0.0319392	17	1.58	P46778	55	1.674	Up	0.00098052	K	60S ribosomal protein L21 OS=Homo sapiens OX=9606 GN=RPL21 PE=1 SV=2	RPL21	1	0.00221016	70.908	GMPHK(1)CYHGK	4	-0.32018	1	0.73	0.741	0.677	1.302	1.087	1.207
hsa03010 Ribosome	0.0319392	17	1.58	P39023	66	1.637	Up	1.8678e-05	K	60S ribosomal protein L3 OS=Homo sapiens OX=9606 GN=RPL3 PE=1 SV=2	RPL3	1	0.0020035	71.153	EVDRPGSK(1)VNK	3	-0.11062	1	0.705	0.753	0.721	1.174	1.195	1.199
hsa03010 Ribosome	0.0319392	17	1.58	P39023	115	1.601	Up	0.00150122	K	60S ribosomal protein L3 OS=Homo sapiens OX=9606 GN=RPL3 PE=1 SV=2	RPL3	1	0.000290809	84.734	TVFAEHISDECK(1)R	3	-0.2477	1	0.682	0.738	0.796	1.244	1.216	1.088
hsa03010 Ribosome	0.0319392	17	1.58	P62249	26	1.879	Up	0.0027232	K	40S ribosomal protein S16 OS=Homo sapiens OX=9606 GN=RPS16 PE=1 SV=2	RPS16	1	0.0195879	51.762	TATAVAHCK(1)R	3	-0.38563	1	0.581	0.604	0.786	1.233	1.194	1.277
hsa03010 Ribosome	0.0319392	17	1.58	P62277	34	1.54	Up	5.7354e-05	K	40S ribosomal protein S13 OS=Homo sapiens OX=9606 GN=RPS13 PE=1 SV=2	RPS13	1	4.38739e-08	131.35	LTSDDVK(1)EQIYK	2	0.23715	1	0.761	0.744	0.773	1.215	1.163	1.13
hsa03010 Ribosome	0.0319392	17	1.58	Q9BYC8	117	5.343	Up	2.3078e-07	K	39S ribosomal protein L32, mitochondrial OS=Homo sapiens OX=9606 GN=MRPL32 PE=1 SV=1	MRPL32	1	0.000231659	73.722	NNIDVCPECGHLK(1)QK	3	-2.4227	1	0.27	0.294	0.273	1.468	1.495	1.509
hsa03010 Ribosome	0.0319392	17	1.58	P62269	137	1.73	Up	2.4191e-06	K	40S ribosomal protein S18 OS=Homo sapiens OX=9606 GN=RPS18 PE=1 SV=3	RPS18	1	0.00404982	83.438	GQHTK(1)TTGR	2	0.13381	2	0.682	0.709	0.705	1.22	1.182	1.224
hsa04216 Ferroptosis	0.304359	2	1.81	P08195	266	1.608	Up	0.00037925	K	4F2 cell-surface antigen heavy chain OS=Homo sapiens OX=9606 GN=SLC3A2 PE=1 SV=3	SLC3A2	1	3.45387e-05	99.788	GLVLGPIHK(1)NQK	3	-0.25361	1	0.772	0.719	0.718	1.155	1.268	1.129
hsa04216 Ferroptosis	0.304359	2	1.81	Q15365	31	1.653	Up	0.0098571	K	Poly(rC)-binding protein 1 OS=Homo sapiens OX=9606 GN=PCBP1 PE=1 SV=2	PCBP1	1	0.00209659	91.658	EVGSIIGK(1)K	2	0.74548	2	0.745	0.741	0.679	1.055	1.447	1.076
hsa05170 Human immunodeficiency virus 1 infection	0.512357	4	1.09	P36507	108	1.663	Up	0.0022007	K	Dual specificity mitogen-activated protein kinase kinase 2 OS=Homo sapiens OX=9606 GN=MAP2K2 PE=1 SV=1	MAP2K2	1	4.9811e-05	95.483	LIHLEIK(1)PAIR	3	-0.84799	1	0.79	0.663	0.705	1.236	1.078	1.275
hsa05170 Human immunodeficiency virus 1 infection	0.512357	4	1.09	P23528	92	1.643	Up	3.7006e-05	K	Cofilin-1 OS=Homo sapiens OX=9606 GN=CFL1 PE=1 SV=3	CFL1	1	1.70741e-10	121.99	YALYDATYETK(1)ESK	2	0.88008	2	0.714	0.743	0.716	1.144	1.227	1.2
hsa05170 Human immunodeficiency virus 1 infection	0.512357	4	1.09	P30101	494	1.633	Up	0.00061616	K	Protein disulfide-isomerase A3 OS=Homo sapiens OX=9606 GN=PDIA3 PE=1 SV=4	PDIA3	1	1.11552e-22	158.91	EATNPPVIQEEK(1)PK	2	-0.21724	3	0.713	0.703	0.767	1.119	1.287	1.158
hsa05170 Human immunodeficiency virus 1 infection	0.512357	4	1.09	Q16531	191	1.804	Up	3.8213e-05	K	DNA damage-binding protein 1 OS=Homo sapiens OX=9606 GN=DDB1 PE=1 SV=1	DDB1	1	5.7889e-05	94.363	HVK(1)TYEVSLR	3	-1.2231	2	0.644	0.677	0.712	1.233	1.223	1.211
hsa05414 Dilated cardiomyopathy (DCM)	0.014672	5	3.14	P18564	548	1.991	Up	0.0032991	K	Integrin beta-6 OS=Homo sapiens OX=9606 GN=ITGB6 PE=1 SV=2	ITGB6	1	9.92231e-07	77.037	HK(1)GLLCGGNGDCDCGECVCR	3	-0.47256	1	0.5	0.688	0.699	1.2	1.299	1.258
hsa05414 Dilated cardiomyopathy (DCM)	0.014672	5	3.14	P23229	144	3.768	Up	1.57151e-05	K	Integrin alpha-6 OS=Homo sapiens OX=9606 GN=ITGA6 PE=1 SV=5	ITGA6	1	3.1719e-06	130.01	QHVNTK(1)QESR	2	1.0391	2	0.354	0.398	0.382	1.474	1.325	1.474
hsa05414 Dilated cardiomyopathy (DCM)	0.014672	5	3.14	P23229	594	2.852	Up	0.0097615	K	Integrin alpha-6 OS=Homo sapiens OX=9606 GN=ITGA6 PE=1 SV=5	ITGA6	1	0.0014851	102.53	YTQELTLK(1)R	2	0.55207	2	0.382	0.524	0.521	1.331	1.345	1.394
hsa05414 Dilated cardiomyopathy (DCM)	0.014672	5	3.14	P63261	50	2.044	Up	0.00151871	K	Actin, cytoplasmic 2 OS=Homo sapiens OX=9606 GN=ACTG1 PE=1 SV=1	ACTG1	1	1.73645e-08	74.364	HQGVMVGMGQK(1)DSYVGDEAQSK	3	-0.91047	1	0.53	0.605	0.719	1.328	1.267	1.194
hsa05414 Dilated cardiomyopathy (DCM)	0.014672	5	3.14	P24043	3092	1.918	Up	1.50302e-05	K	Laminin subunit alpha-2 OS=Homo sapiens OX=9606 GN=LAMA2 PE=1 SV=4	LAMA2	1	0.0350388	67.385	GCIRSLK(1)LTK	2	3.4243	1	0.661	0.626	0.658	1.283	1.221	1.227
hsa05414 Dilated cardiomyopathy (DCM)	0.014672	5	3.14	P17301	261	4.97	Up	7.7205e-05	K	Integrin alpha-2 OS=Homo sapiens OX=9606 GN=ITGA2 PE=1 SV=1	ITGA2	1	5.75495e-08	138.89	K(1)YAYSAASGGR	2	-0.52946	1	0.253	0.307	0.334	1.631	1.406	1.406
hsa04911 Insulin secretion	0.650049	1	1.02	Q13557	268	2.448	Up	0.00064196	K	Calcium/calmodulin-dependent protein kinase type II subunit delta OS=Homo sapiens OX=9606 GN=CAMK2D PE=1 SV=3	CAMK2D	1	9.73432e-06	94.09	ITASEALK(1)HPWICQR	3	-2.1026	1	0.448	0.594	0.572	1.394	1.259	1.298
hsa05131 Shigellosis	0.281246	8	1.28	Q92599	193	1.513	Up	0.0052044	K	Septin-8 OS=Homo sapiens OX=9606 GN=SEPTIN8 PE=1 SV=4	SEPTIN8	1	0.000500407	83.182	ADTISK(1)SELHK	3	0.34589	1	0.772	0.672	0.86	1.196	1.105	1.186
hsa05131 Shigellosis	0.281246	8	1.28	P21796	61	1.877	Up	2.673e-06	K	Voltage-dependent anion-selective channel protein 1 OS=Homo sapiens OX=9606 GN=VDAC1 PE=1 SV=2	VDAC1	1	0.00011548	117.25	VTGSLETK(1)YR	3	1.0352	3	0.663	0.636	0.677	1.244	1.244	1.221
hsa05131 Shigellosis	0.281246	8	1.28	P21796	20	1.506	Up	6.0692e-05	K	Voltage-dependent anion-selective channel protein 1 OS=Homo sapiens OX=9606 GN=VDAC1 PE=1 SV=2	VDAC1	1	5.63016e-11	131.66	DVFTK(1)GYGFGLIK	2	0.76596	2	0.765	0.794	0.754	1.198	1.157	1.128
hsa05131 Shigellosis	0.281246	8	1.28	Q14185	641	2.953	Up	0.001995	K	Dedicator of cytokinesis protein 1 OS=Homo sapiens OX=9606 GN=DOCK1 PE=1 SV=2	DOCK1	1	0.0385614	45.28	QLMK(1)VDGGEVVK	2	-2.6314	1	0.509	0.442	0.439	1.378	1.372	1.355
hsa05131 Shigellosis	0.281246	8	1.28	P63261	50	2.044	Up	0.00151871	K	Actin, cytoplasmic 2 OS=Homo sapiens OX=9606 GN=ACTG1 PE=1 SV=1	ACTG1	1	1.73645e-08	74.364	HQGVMVGMGQK(1)DSYVGDEAQSK	3	-0.91047	1	0.53	0.605	0.719	1.328	1.267	1.194
hsa05131 Shigellosis	0.281246	8	1.28	Q71DI3	19	1.533	Up	0.034541	K	Histone H3.2 OS=Homo sapiens OX=9606 GN=HIST2H3A PE=1 SV=3	HIST2H3A	1	2.45577e-18	167.09	STGGK(1)APRK(1)QLATK(1)AAR	2	0.22427	41	0.669	0.886	0.726	1.238	0.937	1.322
hsa05131 Shigellosis	0.281246	8	1.28	Q71DI3	10	1.777	Up	3.3362e-06	K	Histone H3.2 OS=Homo sapiens OX=9606 GN=HIST2H3A PE=1 SV=3	HIST2H3A	1	0.00024356	111.61	QTARK(1)STGGK(1)APR	2	0.94869	19	0.696	0.688	0.673	1.253	1.186	1.216
hsa05131 Shigellosis	0.281246	8	1.28	P59998	89	1.616	Up	1.98346e-05	K	Actin-related protein 2/3 complex subunit 4 OS=Homo sapiens OX=9606 GN=ARPC4 PE=1 SV=3	ARPC4	1	0.00095295	104.75	ILCHK(1)FMR	3	-0.82501	1	0.745	0.733	0.723	1.215	1.143	1.199
hsa05131 Shigellosis	0.281246	8	1.28	O43707	779	1.506	Up	4.621e-06	K	Alpha-actinin-4 OS=Homo sapiens OX=9606 GN=ACTN4 PE=1 SV=2	ACTN4	1	2.1119e-07	92.098	ASFNHFDK(1)DHGGALGPEEFK	4	-0.48137	1	0.769	0.755	0.788	1.156	1.148	1.177
hsa05131 Shigellosis	0.281246	8	1.28	Q14247	161	1.788	Up	3.79e-05	K	Src substrate cortactin OS=Homo sapiens OX=9606 GN=CTTN PE=1 SV=2	CTTN	1	5.64477e-17	133.78	DYSSGFGGK(1)YGVQADR	2	0.1629	2	0.677	0.659	0.712	1.252	1.23	1.179
hsa05131 Shigellosis	0.281246	8	1.28	Q14247	198	1.588	Up	0.00024373	K	Src substrate cortactin OS=Homo sapiens OX=9606 GN=CTTN PE=1 SV=2	CTTN	1	6.55628e-07	113.24	GFGGK(1)YGIDK	3	-0.15514	2	0.734	0.77	0.724	1.251	1.119	1.169
hsa03450 Non-homologous end-joining	0.160958	2	2.72	P39748	375	1.672	Up	0.00041838	K	Flap endonuclease 1 OS=Homo sapiens OX=9606 GN=FEN1 PE=1 SV=1	FEN1	1	0.00781029	71.379	TGAAGK(1)FK	3	0.36582	1	0.705	0.708	0.735	1.166	1.305	1.121
hsa03450 Non-homologous end-joining	0.160958	2	2.72	P78527	3642	1.51	Up	2.3019e-05	K	DNA-dependent protein kinase catalytic subunit OS=Homo sapiens OX=9606 GN=PRKDC PE=1 SV=3	PRKDC	1	0.0283698	49.715	EFDK(1)HFGK	3	0.53551	1	0.784	0.759	0.766	1.191	1.169	1.127
hsa04070 Phosphatidylinositol signaling system	0.693261	1	0.91	Q8TBX8	99	1.512	Up	0.0178419	K	Phosphatidylinositol 5-phosphate 4-kinase type-2 gamma OS=Homo sapiens OX=9606 GN=PIP4K2C PE=1 SV=3	PIP4K2C	1	6.30063e-05	96.229	ENLPSHFK(1)FK	3	1.5003	1	0.766	0.805	0.732	1.171	0.957	1.353
hsa00380 Tryptophan metabolism	0.861253	1	0.54	Q16836	301	1.579	Up	0.00090275	K	Hydroxyacyl-coenzyme A dehydrogenase, mitochondrial OS=Homo sapiens OX=9606 GN=HADH PE=1 SV=3	HADH	1	0.00585392	66.27	LVAENK(1)FGK	3	0.9182	1	0.745	0.808	0.684	1.199	1.132	1.202
hsa05210 Colorectal cancer	0.731169	1	0.82	P36507	108	1.663	Up	0.0022007	K	Dual specificity mitogen-activated protein kinase kinase 2 OS=Homo sapiens OX=9606 GN=MAP2K2 PE=1 SV=1	MAP2K2	1	4.9811e-05	95.483	LIHLEIK(1)PAIR	3	-0.84799	1	0.79	0.663	0.705	1.236	1.078	1.275
hsa04015 Rap1 signaling pathway	0.42693	4	1.21	P15692	149	1.52	Up	0.0183197	K	Vascular endothelial growth factor A OS=Homo sapiens OX=9606 GN=VEGFA PE=1 SV=2	VEGFA	1	0.0158118	68.016	GK(1)GK(1)GQK(1)R	3	0.20842	1	0.619	0.836	0.835	1.054	1.197	1.23
hsa04015 Rap1 signaling pathway	0.42693	4	1.21	P15692	147	1.52	Up	0.0183197	K	Vascular endothelial growth factor A OS=Homo sapiens OX=9606 GN=VEGFA PE=1 SV=2	VEGFA	1	0.0158118	68.016	GK(1)GK(1)GQK(1)R	3	0.20842	1	0.619	0.836	0.835	1.054	1.197	1.23
hsa04015 Rap1 signaling pathway	0.42693	4	1.21	P15692	152	1.52	Up	0.0183197	K	Vascular endothelial growth factor A OS=Homo sapiens OX=9606 GN=VEGFA PE=1 SV=2	VEGFA	1	0.0158118	68.016	GK(1)GK(1)GQK(1)R	3	0.20842	1	0.619	0.836	0.835	1.054	1.197	1.23
hsa04015 Rap1 signaling pathway	0.42693	4	1.21	P36507	108	1.663	Up	0.0022007	K	Dual specificity mitogen-activated protein kinase kinase 2 OS=Homo sapiens OX=9606 GN=MAP2K2 PE=1 SV=1	MAP2K2	1	4.9811e-05	95.483	LIHLEIK(1)PAIR	3	-0.84799	1	0.79	0.663	0.705	1.236	1.078	1.275
hsa04015 Rap1 signaling pathway	0.42693	4	1.21	P63261	50	2.044	Up	0.00151871	K	Actin, cytoplasmic 2 OS=Homo sapiens OX=9606 GN=ACTG1 PE=1 SV=1	ACTG1	1	1.73645e-08	74.364	HQGVMVGMGQK(1)DSYVGDEAQSK	3	-0.91047	1	0.53	0.605	0.719	1.328	1.267	1.194
hsa04015 Rap1 signaling pathway	0.42693	4	1.21	Q13009	564	2.554	Up	2.264e-05	K	T-lymphoma invasion and metastasis-inducing protein 1 OS=Homo sapiens OX=9606 GN=TIAM1 PE=1 SV=2	TIAM1	1	0.00536023	86.794	LLK(1)SEIK	3	-0.69534	1	0.501	0.52	0.54	1.387	1.234	1.366
hsa04010 MAPK signaling pathway	0.308828	4	1.42	P15692	149	1.52	Up	0.0183197	K	Vascular endothelial growth factor A OS=Homo sapiens OX=9606 GN=VEGFA PE=1 SV=2	VEGFA	1	0.0158118	68.016	GK(1)GK(1)GQK(1)R	3	0.20842	1	0.619	0.836	0.835	1.054	1.197	1.23
hsa04010 MAPK signaling pathway	0.308828	4	1.42	P15692	147	1.52	Up	0.0183197	K	Vascular endothelial growth factor A OS=Homo sapiens OX=9606 GN=VEGFA PE=1 SV=2	VEGFA	1	0.0158118	68.016	GK(1)GK(1)GQK(1)R	3	0.20842	1	0.619	0.836	0.835	1.054	1.197	1.23
hsa04010 MAPK signaling pathway	0.308828	4	1.42	P15692	152	1.52	Up	0.0183197	K	Vascular endothelial growth factor A OS=Homo sapiens OX=9606 GN=VEGFA PE=1 SV=2	VEGFA	1	0.0158118	68.016	GK(1)GK(1)GQK(1)R	3	0.20842	1	0.619	0.836	0.835	1.054	1.197	1.23
hsa04010 MAPK signaling pathway	0.308828	4	1.42	P21333	994	1.525	Up	1.9772e-05	K	Filamin-A OS=Homo sapiens OX=9606 GN=FLNA PE=1 SV=4	FLNA	1	0.00346172	85.813	DQEFTVK(1)SK	3	-0.051795	2	0.786	0.743	0.763	1.155	1.183	1.157
hsa04010 MAPK signaling pathway	0.308828	4	1.42	P36507	108	1.663	Up	0.0022007	K	Dual specificity mitogen-activated protein kinase kinase 2 OS=Homo sapiens OX=9606 GN=MAP2K2 PE=1 SV=1	MAP2K2	1	4.9811e-05	95.483	LIHLEIK(1)PAIR	3	-0.84799	1	0.79	0.663	0.705	1.236	1.078	1.275
hsa04010 MAPK signaling pathway	0.308828	4	1.42	Q9BY84	312	1.871	Up	0.00018047	K	Dual specificity protein phosphatase 16 OS=Homo sapiens OX=9606 GN=DUSP16 PE=1 SV=1	DUSP16	1	0.00770946	71.614	LK(1)LLHLEK	3	0.096574	1	0.721	0.635	0.625	1.209	1.264	1.234
hsa04141 Protein processing in endoplasmic reticulum	0.00255868	14	2.2	Q07065	301	1.726	Up	0.0034984	K	Cytoskeleton-associated protein 4 OS=Homo sapiens OX=9606 GN=CKAP4 PE=1 SV=2	CKAP4	1	0.00142164	100.92	EIQTSAK(1)SR	2	-1.0848	1	0.759	0.586	0.755	1.211	1.151	1.262
hsa04141 Protein processing in endoplasmic reticulum	0.00255868	14	2.2	P14625	467	2.375	Up	0.00132479	K	Endoplasmin OS=Homo sapiens OX=9606 GN=HSP90B1 PE=1 SV=1	HSP90B1	1	0.0260932	82.287	K(1)TLDMIK	2	-1.9897	1	0.517	0.571	0.564	1.316	1.312	1.296
hsa04141 Protein processing in endoplasmic reticulum	0.00255868	14	2.2	P14625	473	1.531	Up	0.0021359	K	Endoplasmin OS=Homo sapiens OX=9606 GN=HSP90B1 PE=1 SV=1	HSP90B1	1	0.0291692	80.438	TLDMIK(1)K	3	-0.98878	2	0.833	0.741	0.715	1.239	1.084	1.181
hsa04141 Protein processing in endoplasmic reticulum	0.00255868	14	2.2	P55072	651	1.786	Up	0.0026628	K	Transitional endoplasmic reticulum ATPase OS=Homo sapiens OX=9606 GN=VCP PE=1 SV=4	VCP	1	0.0111412	42.095	LDQLIYIPLPDEK(1)SR	3	-0.55872	1	0.764	0.576	0.709	1.167	1.218	1.275
hsa04141 Protein processing in endoplasmic reticulum	0.00255868	14	2.2	P04843	187	2.143	Up	1.58621e-05	K	Dolichyl-diphosphooligosaccharide--protein glycosyltransferase subunit 1 OS=Homo sapiens OX=9606 GN=RPN1 PE=1 SV=1	RPN1	1	1.75673e-17	156.17	NVESYTK(1)LGNPTR	2	-0.077266	1	0.57	0.614	0.604	1.244	1.32	1.267
hsa04141 Protein processing in endoplasmic reticulum	0.00255868	14	2.2	Q15084	368	1.539	Up	1.70414e-05	K	Protein disulfide-isomerase A6 OS=Homo sapiens OX=9606 GN=PDIA6 PE=1 SV=1	PDIA6	1	0.0107878	97.798	MK(1)FALLK	2	-0.72228	1	0.752	0.78	0.746	1.188	1.148	1.169
hsa04141 Protein processing in endoplasmic reticulum	0.00255868	14	2.2	P04844	442	1.522	Up	0.0020441	K	Dolichyl-diphosphooligosaccharide--protein glycosyltransferase subunit 2 OS=Homo sapiens OX=9606 GN=RPN2 PE=1 SV=3	RPN2	1	9.65183e-11	115.57	LHNQK(1)TGQEVVFVAEPDNK	3	-0.45133	1	0.74	0.848	0.707	1.198	1.112	1.182
hsa04141 Protein processing in endoplasmic reticulum	0.00255868	14	2.2	P04844	311	1.701	Up	0.00068179	K	Dolichyl-diphosphooligosaccharide--protein glycosyltransferase subunit 2 OS=Homo sapiens OX=9606 GN=RPN2 PE=1 SV=3	RPN2	1	3.52812e-05	124.06	LEHAK(1)SVASR	2	-0.83563	2	0.647	0.769	0.706	1.219	1.246	1.144
hsa04141 Protein processing in endoplasmic reticulum	0.00255868	14	2.2	Q92598	135	1.659	Up	0.00020381	K	Heat shock protein 105 kDa OS=Homo sapiens OX=9606 GN=HSPH1 PE=1 SV=1	HSPH1	1	1.99598e-06	72.585	K(1)PVTDCVISVPSFFTDAER	3	0.53078	1	0.698	0.742	0.722	1.273	1.184	1.129
hsa04141 Protein processing in endoplasmic reticulum	0.00255868	14	2.2	Q8TCJ2	688	1.573	Up	0.00030171	K	Dolichyl-diphosphooligosaccharide--protein glycosyltransferase subunit STT3B OS=Homo sapiens OX=9606 GN=STT3B PE=1 SV=1	STT3B	1	0.000563873	81.625	IAEGEHPK(1)DIR	3	1.1943	1	0.753	0.725	0.767	1.259	1.124	1.148
hsa04141 Protein processing in endoplasmic reticulum	0.00255868	14	2.2	Q8TCJ2	784	1.902	Up	1.014e-06	K	Dolichyl-diphosphooligosaccharide--protein glycosyltransferase subunit STT3B OS=Homo sapiens OX=9606 GN=STT3B PE=1 SV=1	STT3B	1	0.00186854	91.853	ETLDHK(1)PR	2	2.0478	2	0.65	0.638	0.668	1.235	1.226	1.259
hsa04141 Protein processing in endoplasmic reticulum	0.00255868	14	2.2	P27824	87	1.514	Up	0.00095527	K	Calnexin OS=Homo sapiens OX=9606 GN=CANX PE=1 SV=2	CANX	1	0.014782	46.88	GTLSGWILSK(1)AK	3	-0.67335	1	0.807	0.786	0.712	1.226	1.112	1.152
hsa04141 Protein processing in endoplasmic reticulum	0.00255868	14	2.2	P30101	494	1.633	Up	0.00061616	K	Protein disulfide-isomerase A3 OS=Homo sapiens OX=9606 GN=PDIA3 PE=1 SV=4	PDIA3	1	1.11552e-22	158.91	EATNPPVIQEEK(1)PK	2	-0.21724	3	0.713	0.703	0.767	1.119	1.287	1.158
hsa04141 Protein processing in endoplasmic reticulum	0.00255868	14	2.2	P25685	35	1.664	Up	0.000144468	K	DnaJ homolog subfamily B member 1 OS=Homo sapiens OX=9606 GN=DNAJB1 PE=1 SV=4	DNAJB1	1	0.0161937	67.032	YHPDK(1)NK	3	3.4717	2	0.753	0.692	0.711	1.223	1.134	1.231
hsa04141 Protein processing in endoplasmic reticulum	0.00255868	14	2.2	P25685	3	1.65	Up	0.000140274	K	DnaJ homolog subfamily B member 1 OS=Homo sapiens OX=9606 GN=DNAJB1 PE=1 SV=4	DNAJB1	1	3.11133e-07	121.45	GK(1)DYYQTLGLAR	2	1.5419	1	0.756	0.693	0.722	1.25	1.15	1.182
hsa04141 Protein processing in endoplasmic reticulum	0.00255868	14	2.2	P11021	553	1.584	Up	0.00051646	K	Endoplasmic reticulum chaperone BiP OS=Homo sapiens OX=9606 GN=HSPA5 PE=1 SV=2	HSPA5	1	0.0198462	68.915	FAEEDK(1)K	3	0.25072	1	0.739	0.758	0.737	1.273	1.094	1.171
hsa04141 Protein processing in endoplasmic reticulum	0.00255868	14	2.2	P11021	352	1.593	Up	7.6558e-05	K	Endoplasmic reticulum chaperone BiP OS=Homo sapiens OX=9606 GN=HSPA5 PE=1 SV=2	HSPA5	1	0.000769989	104.22	VLEDSDLK(1)K	3	2.7364	2	0.731	0.73	0.76	1.123	1.214	1.2
hsa04141 Protein processing in endoplasmic reticulum	0.00255868	14	2.2	P46977	440	1.518	Up	0.00032166	K	Dolichyl-diphosphooligosaccharide--protein glycosyltransferase subunit STT3A OS=Homo sapiens OX=9606 GN=STT3A PE=1 SV=2	STT3A	1	0.00938561	58.274	NLDISRPDK(1)K	3	-0.18069	1	0.801	0.738	0.761	1.186	1.102	1.203
hsa04141 Protein processing in endoplasmic reticulum	0.00255868	14	2.2	Q9Y4L1	991	1.814	Up	0.00105528	K	Hypoxia up-regulated protein 1 OS=Homo sapiens OX=9606 GN=HYOU1 PE=1 SV=1	HYOU1	1	0.0356549	68.657	EQSTGQK(1)R	2	-0.21595	1	0.705	0.586	0.734	1.194	1.25	1.23
hsa04141 Protein processing in endoplasmic reticulum	0.00255868	14	2.2	Q9Y4L1	537	1.679	Up	0.00189553	K	Hypoxia up-regulated protein 1 OS=Homo sapiens OX=9606 GN=HYOU1 PE=1 SV=1	HYOU1	1	2.35366e-05	105.65	KYPDYESK(1)GIK	3	1.7955	1	0.728	0.644	0.773	1.297	1.201	1.103
hsa00670 One carbon pool by folate	0.6008	1	1.16	P34897	200	1.553	Up	0.0024569	K	Serine hydroxymethyltransferase, mitochondrial OS=Homo sapiens OX=9606 GN=SHMT2 PE=1 SV=3	SHMT2	1	1.11032e-09	113.54	LNPK(1)TGLIDYNQLALTAR	3	-0.53359	1	0.671	0.753	0.836	1.158	1.146	1.206
hsa04926 Relaxin signaling pathway	0.443608	2	1.36	P15692	149	1.52	Up	0.0183197	K	Vascular endothelial growth factor A OS=Homo sapiens OX=9606 GN=VEGFA PE=1 SV=2	VEGFA	1	0.0158118	68.016	GK(1)GK(1)GQK(1)R	3	0.20842	1	0.619	0.836	0.835	1.054	1.197	1.23
hsa04926 Relaxin signaling pathway	0.443608	2	1.36	P15692	147	1.52	Up	0.0183197	K	Vascular endothelial growth factor A OS=Homo sapiens OX=9606 GN=VEGFA PE=1 SV=2	VEGFA	1	0.0158118	68.016	GK(1)GK(1)GQK(1)R	3	0.20842	1	0.619	0.836	0.835	1.054	1.197	1.23
hsa04926 Relaxin signaling pathway	0.443608	2	1.36	P15692	152	1.52	Up	0.0183197	K	Vascular endothelial growth factor A OS=Homo sapiens OX=9606 GN=VEGFA PE=1 SV=2	VEGFA	1	0.0158118	68.016	GK(1)GK(1)GQK(1)R	3	0.20842	1	0.619	0.836	0.835	1.054	1.197	1.23
hsa04926 Relaxin signaling pathway	0.443608	2	1.36	P36507	108	1.663	Up	0.0022007	K	Dual specificity mitogen-activated protein kinase kinase 2 OS=Homo sapiens OX=9606 GN=MAP2K2 PE=1 SV=1	MAP2K2	1	4.9811e-05	95.483	LIHLEIK(1)PAIR	3	-0.84799	1	0.79	0.663	0.705	1.236	1.078	1.275
hsa00514 Other types of O-glycan biosynthesis	0.407859	1	2.04	P15291	348	1.811	Up	0.0005237	K	Beta-1,4-galactosyltransferase 1 OS=Homo sapiens OX=9606 GN=B4GALT1 PE=1 SV=5	B4GALT1	1	0.0295481	72.23	K(1)NEPNPQR	2	0.42742	1	0.751	0.632	0.648	1.279	1.22	1.18
hsa03060 Protein export	0.731169	1	0.82	P11021	553	1.584	Up	0.00051646	K	Endoplasmic reticulum chaperone BiP OS=Homo sapiens OX=9606 GN=HSPA5 PE=1 SV=2	HSPA5	1	0.0198462	68.915	FAEEDK(1)K	3	0.25072	1	0.739	0.758	0.737	1.273	1.094	1.171
hsa03060 Protein export	0.731169	1	0.82	P11021	352	1.593	Up	7.6558e-05	K	Endoplasmic reticulum chaperone BiP OS=Homo sapiens OX=9606 GN=HSPA5 PE=1 SV=2	HSPA5	1	0.000769989	104.22	VLEDSDLK(1)K	3	2.7364	2	0.731	0.73	0.76	1.123	1.214	1.2
hsa04974 Protein digestion and absorption	0.160958	2	2.72	P08195	266	1.608	Up	0.00037925	K	4F2 cell-surface antigen heavy chain OS=Homo sapiens OX=9606 GN=SLC3A2 PE=1 SV=3	SLC3A2	1	3.45387e-05	99.788	GLVLGPIHK(1)NQK	3	-0.25361	1	0.772	0.719	0.718	1.155	1.268	1.129
hsa04974 Protein digestion and absorption	0.160958	2	2.72	P02458	1444	3.469	Up	1.93387e-05	K	Collagen alpha-1(II) chain OS=Homo sapiens OX=9606 GN=COL2A1 PE=1 SV=3	COL2A1	1	0.014601	68.915	HTGK(1)WGK	3	-0.79413	1	0.434	0.395	0.388	1.483	1.302	1.437
hsa04140 Autophagy - animal	0.347308	3	1.44	P36507	108	1.663	Up	0.0022007	K	Dual specificity mitogen-activated protein kinase kinase 2 OS=Homo sapiens OX=9606 GN=MAP2K2 PE=1 SV=1	MAP2K2	1	4.9811e-05	95.483	LIHLEIK(1)PAIR	3	-0.84799	1	0.79	0.663	0.705	1.236	1.078	1.275
hsa04140 Autophagy - animal	0.347308	3	1.44	P09429	90	1.761	Up	0.000121985	K	High mobility group protein B1 OS=Homo sapiens OX=9606 GN=HMGB1 PE=1 SV=3	HMGB1	1	0.014499	80.688	FK(1)DPNAPK	2	-0.291	2	0.677	0.691	0.704	1.289	1.223	1.136
hsa04140 Autophagy - animal	0.347308	3	1.44	Q15382	97	1.749	Up	0.000122954	K	GTP-binding protein Rheb OS=Homo sapiens OX=9606 GN=RHEB PE=1 SV=1	RHEB	1	0.0026732	65.842	SFEVIK(1)VIHGK	3	1.1424	1	0.669	0.666	0.743	1.19	1.244	1.201
hsa04918 Thyroid hormone synthesis	0.0487925	4	2.72	P02766	96	4.64	Up	1.0218e-07	K	Transthyretin OS=Homo sapiens OX=9606 GN=TTR PE=1 SV=1	TTR	1	9.62145e-21	174.24	VEIDTK(1)SYWK	2	0.52001	2	0.318	0.326	0.304	1.477	1.456	1.466
hsa04918 Thyroid hormone synthesis	0.0487925	4	2.72	P14625	467	2.375	Up	0.00132479	K	Endoplasmin OS=Homo sapiens OX=9606 GN=HSP90B1 PE=1 SV=1	HSP90B1	1	0.0260932	82.287	K(1)TLDMIK	2	-1.9897	1	0.517	0.571	0.564	1.316	1.312	1.296
hsa04918 Thyroid hormone synthesis	0.0487925	4	2.72	P14625	473	1.531	Up	0.0021359	K	Endoplasmin OS=Homo sapiens OX=9606 GN=HSP90B1 PE=1 SV=1	HSP90B1	1	0.0291692	80.438	TLDMIK(1)K	3	-0.98878	2	0.833	0.741	0.715	1.239	1.084	1.181
hsa04918 Thyroid hormone synthesis	0.0487925	4	2.72	P27824	87	1.514	Up	0.00095527	K	Calnexin OS=Homo sapiens OX=9606 GN=CANX PE=1 SV=2	CANX	1	0.014782	46.88	GTLSGWILSK(1)AK	3	-0.67335	1	0.807	0.786	0.712	1.226	1.112	1.152
hsa04918 Thyroid hormone synthesis	0.0487925	4	2.72	P11021	553	1.584	Up	0.00051646	K	Endoplasmic reticulum chaperone BiP OS=Homo sapiens OX=9606 GN=HSPA5 PE=1 SV=2	HSPA5	1	0.0198462	68.915	FAEEDK(1)K	3	0.25072	1	0.739	0.758	0.737	1.273	1.094	1.171
hsa04918 Thyroid hormone synthesis	0.0487925	4	2.72	P11021	352	1.593	Up	7.6558e-05	K	Endoplasmic reticulum chaperone BiP OS=Homo sapiens OX=9606 GN=HSPA5 PE=1 SV=2	HSPA5	1	0.000769989	104.22	VLEDSDLK(1)K	3	2.7364	2	0.731	0.73	0.76	1.123	1.214	1.2
hsa05213 Endometrial cancer	0.207923	2	2.33	P36507	108	1.663	Up	0.0022007	K	Dual specificity mitogen-activated protein kinase kinase 2 OS=Homo sapiens OX=9606 GN=MAP2K2 PE=1 SV=1	MAP2K2	1	4.9811e-05	95.483	LIHLEIK(1)PAIR	3	-0.84799	1	0.79	0.663	0.705	1.236	1.078	1.275
hsa05213 Endometrial cancer	0.207923	2	2.33	P35221	881	1.511	Up	0.00040268	K	Catenin alpha-1 OS=Homo sapiens OX=9606 GN=CTNNA1 PE=1 SV=1	CTNNA1	1	0.00164808	73.927	EKQDETQTK(1)IK	3	0.98541	1	0.774	0.811	0.723	1.193	1.172	1.122
hsa05412 Arrhythmogenic right ventricular cardiomyopathy (ARVC)	0.00151196	6	4.08	P18564	548	1.991	Up	0.0032991	K	Integrin beta-6 OS=Homo sapiens OX=9606 GN=ITGB6 PE=1 SV=2	ITGB6	1	9.92231e-07	77.037	HK(1)GLLCGGNGDCDCGECVCR	3	-0.47256	1	0.5	0.688	0.699	1.2	1.299	1.258
hsa05412 Arrhythmogenic right ventricular cardiomyopathy (ARVC)	0.00151196	6	4.08	P23229	144	3.768	Up	1.57151e-05	K	Integrin alpha-6 OS=Homo sapiens OX=9606 GN=ITGA6 PE=1 SV=5	ITGA6	1	3.1719e-06	130.01	QHVNTK(1)QESR	2	1.0391	2	0.354	0.398	0.382	1.474	1.325	1.474
hsa05412 Arrhythmogenic right ventricular cardiomyopathy (ARVC)	0.00151196	6	4.08	P23229	594	2.852	Up	0.0097615	K	Integrin alpha-6 OS=Homo sapiens OX=9606 GN=ITGA6 PE=1 SV=5	ITGA6	1	0.0014851	102.53	YTQELTLK(1)R	2	0.55207	2	0.382	0.524	0.521	1.331	1.345	1.394
hsa05412 Arrhythmogenic right ventricular cardiomyopathy (ARVC)	0.00151196	6	4.08	P63261	50	2.044	Up	0.00151871	K	Actin, cytoplasmic 2 OS=Homo sapiens OX=9606 GN=ACTG1 PE=1 SV=1	ACTG1	1	1.73645e-08	74.364	HQGVMVGMGQK(1)DSYVGDEAQSK	3	-0.91047	1	0.53	0.605	0.719	1.328	1.267	1.194
hsa05412 Arrhythmogenic right ventricular cardiomyopathy (ARVC)	0.00151196	6	4.08	P24043	3092	1.918	Up	1.50302e-05	K	Laminin subunit alpha-2 OS=Homo sapiens OX=9606 GN=LAMA2 PE=1 SV=4	LAMA2	1	0.0350388	67.385	GCIRSLK(1)LTK	2	3.4243	1	0.661	0.626	0.658	1.283	1.221	1.227
hsa05412 Arrhythmogenic right ventricular cardiomyopathy (ARVC)	0.00151196	6	4.08	P35221	881	1.511	Up	0.00040268	K	Catenin alpha-1 OS=Homo sapiens OX=9606 GN=CTNNA1 PE=1 SV=1	CTNNA1	1	0.00164808	73.927	EKQDETQTK(1)IK	3	0.98541	1	0.774	0.811	0.723	1.193	1.172	1.122
hsa05412 Arrhythmogenic right ventricular cardiomyopathy (ARVC)	0.00151196	6	4.08	P17301	261	4.97	Up	7.7205e-05	K	Integrin alpha-2 OS=Homo sapiens OX=9606 GN=ITGA2 PE=1 SV=1	ITGA2	1	5.75495e-08	138.89	K(1)YAYSAASGGR	2	-0.52946	1	0.253	0.307	0.334	1.631	1.406	1.406
hsa04530 Tight junction	0.318879	6	1.29	Q4VCS5	585	2.51	Up	9.7814e-08	K	Angiomotin OS=Homo sapiens OX=9606 GN=AMOT PE=1 SV=1	AMOT	1	0.0447623	40.941	DQALSNAQAK(1)VVK	2	0.43599	1	0.537	0.526	0.519	1.311	1.317	1.343
hsa04530 Tight junction	0.318879	6	1.29	P35580	1782	1.618	Up	0.00133836	K	Myosin-10 OS=Homo sapiens OX=9606 GN=MYH10 PE=1 SV=3	MYH10	1	0.000848405	90.614	SAAQK(1)SDNAR	2	-0.18483	1	0.811	0.675	0.713	1.145	1.249	1.164
hsa04530 Tight junction	0.318879	6	1.29	P63261	50	2.044	Up	0.00151871	K	Actin, cytoplasmic 2 OS=Homo sapiens OX=9606 GN=ACTG1 PE=1 SV=1	ACTG1	1	1.73645e-08	74.364	HQGVMVGMGQK(1)DSYVGDEAQSK	3	-0.91047	1	0.53	0.605	0.719	1.328	1.267	1.194
hsa04530 Tight junction	0.318879	6	1.29	Q13009	564	2.554	Up	2.264e-05	K	T-lymphoma invasion and metastasis-inducing protein 1 OS=Homo sapiens OX=9606 GN=TIAM1 PE=1 SV=2	TIAM1	1	0.00536023	86.794	LLK(1)SEIK	3	-0.69534	1	0.501	0.52	0.54	1.387	1.234	1.366
hsa04530 Tight junction	0.318879	6	1.29	O43707	779	1.506	Up	4.621e-06	K	Alpha-actinin-4 OS=Homo sapiens OX=9606 GN=ACTN4 PE=1 SV=2	ACTN4	1	2.1119e-07	92.098	ASFNHFDK(1)DHGGALGPEEFK	4	-0.48137	1	0.769	0.755	0.788	1.156	1.148	1.177
hsa04530 Tight junction	0.318879	6	1.29	Q14247	161	1.788	Up	3.79e-05	K	Src substrate cortactin OS=Homo sapiens OX=9606 GN=CTTN PE=1 SV=2	CTTN	1	5.64477e-17	133.78	DYSSGFGGK(1)YGVQADR	2	0.1629	2	0.677	0.659	0.712	1.252	1.23	1.179
hsa04530 Tight junction	0.318879	6	1.29	Q14247	198	1.588	Up	0.00024373	K	Src substrate cortactin OS=Homo sapiens OX=9606 GN=CTTN PE=1 SV=2	CTTN	1	6.55628e-07	113.24	GFGGK(1)YGIDK	3	-0.15514	2	0.734	0.77	0.724	1.251	1.119	1.169
hsa04810 Regulation of actin cytoskeleton	0.00568736	12	2.17	P18564	548	1.991	Up	0.0032991	K	Integrin beta-6 OS=Homo sapiens OX=9606 GN=ITGB6 PE=1 SV=2	ITGB6	1	9.92231e-07	77.037	HK(1)GLLCGGNGDCDCGECVCR	3	-0.47256	1	0.5	0.688	0.699	1.2	1.299	1.258
hsa04810 Regulation of actin cytoskeleton	0.00568736	12	2.17	P36507	108	1.663	Up	0.0022007	K	Dual specificity mitogen-activated protein kinase kinase 2 OS=Homo sapiens OX=9606 GN=MAP2K2 PE=1 SV=1	MAP2K2	1	4.9811e-05	95.483	LIHLEIK(1)PAIR	3	-0.84799	1	0.79	0.663	0.705	1.236	1.078	1.275
hsa04810 Regulation of actin cytoskeleton	0.00568736	12	2.17	P23528	92	1.643	Up	3.7006e-05	K	Cofilin-1 OS=Homo sapiens OX=9606 GN=CFL1 PE=1 SV=3	CFL1	1	1.70741e-10	121.99	YALYDATYETK(1)ESK	2	0.88008	2	0.714	0.743	0.716	1.144	1.227	1.2
hsa04810 Regulation of actin cytoskeleton	0.00568736	12	2.17	P23229	144	3.768	Up	1.57151e-05	K	Integrin alpha-6 OS=Homo sapiens OX=9606 GN=ITGA6 PE=1 SV=5	ITGA6	1	3.1719e-06	130.01	QHVNTK(1)QESR	2	1.0391	2	0.354	0.398	0.382	1.474	1.325	1.474
hsa04810 Regulation of actin cytoskeleton	0.00568736	12	2.17	P23229	594	2.852	Up	0.0097615	K	Integrin alpha-6 OS=Homo sapiens OX=9606 GN=ITGA6 PE=1 SV=5	ITGA6	1	0.0014851	102.53	YTQELTLK(1)R	2	0.55207	2	0.382	0.524	0.521	1.331	1.345	1.394
hsa04810 Regulation of actin cytoskeleton	0.00568736	12	2.17	Q7L576	1188	1.882	Up	5.6212e-05	K	Cytoplasmic FMR1-interacting protein 1 OS=Homo sapiens OX=9606 GN=CYFIP1 PE=1 SV=1	CYFIP1	0.999952	0.000231257	89.231	VQK(1)HDGKDEIIK	4	-1.3205	2	0.634	0.688	0.65	1.296	1.192	1.224
hsa04810 Regulation of actin cytoskeleton	0.00568736	12	2.17	O43707	779	1.506	Up	4.621e-06	K	Alpha-actinin-4 OS=Homo sapiens OX=9606 GN=ACTN4 PE=1 SV=2	ACTN4	1	2.1119e-07	92.098	ASFNHFDK(1)DHGGALGPEEFK	4	-0.48137	1	0.769	0.755	0.788	1.156	1.148	1.177
hsa04810 Regulation of actin cytoskeleton	0.00568736	12	2.17	Q13009	564	2.554	Up	2.264e-05	K	T-lymphoma invasion and metastasis-inducing protein 1 OS=Homo sapiens OX=9606 GN=TIAM1 PE=1 SV=2	TIAM1	1	0.00536023	86.794	LLK(1)SEIK	3	-0.69534	1	0.501	0.52	0.54	1.387	1.234	1.366
hsa04810 Regulation of actin cytoskeleton	0.00568736	12	2.17	P63261	50	2.044	Up	0.00151871	K	Actin, cytoplasmic 2 OS=Homo sapiens OX=9606 GN=ACTG1 PE=1 SV=1	ACTG1	1	1.73645e-08	74.364	HQGVMVGMGQK(1)DSYVGDEAQSK	3	-0.91047	1	0.53	0.605	0.719	1.328	1.267	1.194
hsa04810 Regulation of actin cytoskeleton	0.00568736	12	2.17	Q14185	641	2.953	Up	0.001995	K	Dedicator of cytokinesis protein 1 OS=Homo sapiens OX=9606 GN=DOCK1 PE=1 SV=2	DOCK1	1	0.0385614	45.28	QLMK(1)VDGGEVVK	2	-2.6314	1	0.509	0.442	0.439	1.378	1.372	1.355
hsa04810 Regulation of actin cytoskeleton	0.00568736	12	2.17	Q8TBX8	99	1.512	Up	0.0178419	K	Phosphatidylinositol 5-phosphate 4-kinase type-2 gamma OS=Homo sapiens OX=9606 GN=PIP4K2C PE=1 SV=3	PIP4K2C	1	6.30063e-05	96.229	ENLPSHFK(1)FK	3	1.5003	1	0.766	0.805	0.732	1.171	0.957	1.353
hsa04810 Regulation of actin cytoskeleton	0.00568736	12	2.17	P59998	89	1.616	Up	1.98346e-05	K	Actin-related protein 2/3 complex subunit 4 OS=Homo sapiens OX=9606 GN=ARPC4 PE=1 SV=3	ARPC4	1	0.00095295	104.75	ILCHK(1)FMR	3	-0.82501	1	0.745	0.733	0.723	1.215	1.143	1.199
hsa04810 Regulation of actin cytoskeleton	0.00568736	12	2.17	P17301	261	4.97	Up	7.7205e-05	K	Integrin alpha-2 OS=Homo sapiens OX=9606 GN=ITGA2 PE=1 SV=1	ITGA2	1	5.75495e-08	138.89	K(1)YAYSAASGGR	2	-0.52946	1	0.253	0.307	0.334	1.631	1.406	1.406
hsa00310 Lysine degradation	0.87849	1	0.51	Q16836	301	1.579	Up	0.00090275	K	Hydroxyacyl-coenzyme A dehydrogenase, mitochondrial OS=Homo sapiens OX=9606 GN=HADH PE=1 SV=3	HADH	1	0.00585392	66.27	LVAENK(1)FGK	3	0.9182	1	0.745	0.808	0.684	1.199	1.132	1.202
hsa04550 Signaling pathways regulating pluripotency of stem cells	0.650049	1	1.02	P36507	108	1.663	Up	0.0022007	K	Dual specificity mitogen-activated protein kinase kinase 2 OS=Homo sapiens OX=9606 GN=MAP2K2 PE=1 SV=1	MAP2K2	1	4.9811e-05	95.483	LIHLEIK(1)PAIR	3	-0.84799	1	0.79	0.663	0.705	1.236	1.078	1.275
hsa04024 cAMP signaling pathway	0.182754	5	1.63	Q09472	1769	4.035	Up	2.2499e-07	K	Histone acetyltransferase p300 OS=Homo sapiens OX=9606 GN=EP300 PE=1 SV=2	EP300	1	1.89332e-49	208.56	VVQHTK(1)GCK(1)R	2	0.47995	5	0.357	0.351	0.363	1.501	1.405	1.415
hsa04024 cAMP signaling pathway	0.182754	5	1.63	Q09472	1772	11.928	Up	3.2215e-07	K	Histone acetyltransferase p300 OS=Homo sapiens OX=9606 GN=EP300 PE=1 SV=2	EP300	1	1.89332e-49	208.56	VVQHTK(1)GCK(1)R	2	0.47995	3	0.123	0.136	0.141	1.65	1.565	1.556
hsa04024 cAMP signaling pathway	0.182754	5	1.63	Q09472	1762	7.585	Up	0.00119748	K	Histone acetyltransferase p300 OS=Homo sapiens OX=9606 GN=EP300 PE=1 SV=2	EP300	1	2.32223e-16	145.52	NANCSLPSCQK(1)MK(1)R	2	-1.3586	2	0.201	0.229	0.18	1.533	1.572	1.522
hsa04024 cAMP signaling pathway	0.182754	5	1.63	Q09472	1774	3.958	Up	0.0092049	K	Histone acetyltransferase p300 OS=Homo sapiens OX=9606 GN=EP300 PE=1 SV=2	EP300	1	0.000167046	115.33	K(1)TNGGCPICK	3	-1.4801	4	0.287	0.344	0.456	1.437	1.433	1.432
hsa04024 cAMP signaling pathway	0.182754	5	1.63	Q09472	1704	1.891	Up	5.0177e-07	K	Histone acetyltransferase p300 OS=Homo sapiens OX=9606 GN=EP300 PE=1 SV=2	EP300	1	2.47609e-10	80.688	NHDHK(1)MEK(1)LGLGLDDESNNQQAAATQSPGDSR	4	4.3749	6	0.642	0.664	0.659	1.234	1.257	1.224
hsa04024 cAMP signaling pathway	0.182754	5	1.63	Q09472	1760	1.885	Up	3.5127e-06	K	Histone acetyltransferase p300 OS=Homo sapiens OX=9606 GN=EP300 PE=1 SV=2	EP300	1	2.32223e-16	145.52	NANCSLPSCQK(1)MK(1)R	2	-1.3586	5	0.642	0.648	0.679	1.223	1.266	1.222
hsa04024 cAMP signaling pathway	0.182754	5	1.63	P36507	108	1.663	Up	0.0022007	K	Dual specificity mitogen-activated protein kinase kinase 2 OS=Homo sapiens OX=9606 GN=MAP2K2 PE=1 SV=1	MAP2K2	1	4.9811e-05	95.483	LIHLEIK(1)PAIR	3	-0.84799	1	0.79	0.663	0.705	1.236	1.078	1.275
hsa04024 cAMP signaling pathway	0.182754	5	1.63	Q13557	268	2.448	Up	0.00064196	K	Calcium/calmodulin-dependent protein kinase type II subunit delta OS=Homo sapiens OX=9606 GN=CAMK2D PE=1 SV=3	CAMK2D	1	9.73432e-06	94.09	ITASEALK(1)HPWICQR	3	-2.1026	1	0.448	0.594	0.572	1.394	1.259	1.298
hsa04024 cAMP signaling pathway	0.182754	5	1.63	Q13009	564	2.554	Up	2.264e-05	K	T-lymphoma invasion and metastasis-inducing protein 1 OS=Homo sapiens OX=9606 GN=TIAM1 PE=1 SV=2	TIAM1	1	0.00536023	86.794	LLK(1)SEIK	3	-0.69534	1	0.501	0.52	0.54	1.387	1.234	1.366
hsa04024 cAMP signaling pathway	0.182754	5	1.63	Q92793	1811	7.596	Up	0.00094031	K	CREB-binding protein OS=Homo sapiens OX=9606 GN=CREBBP PE=1 SV=3	CREBBP	1	0.00377762	83.182	K(1)TNGGCPVCK	2	0.18561	1	0.185	0.196	0.228	1.546	1.535	1.545
hsa04912 GnRH signaling pathway	0.566312	2	1.09	P36507	108	1.663	Up	0.0022007	K	Dual specificity mitogen-activated protein kinase kinase 2 OS=Homo sapiens OX=9606 GN=MAP2K2 PE=1 SV=1	MAP2K2	1	4.9811e-05	95.483	LIHLEIK(1)PAIR	3	-0.84799	1	0.79	0.663	0.705	1.236	1.078	1.275
hsa04912 GnRH signaling pathway	0.566312	2	1.09	Q13557	268	2.448	Up	0.00064196	K	Calcium/calmodulin-dependent protein kinase type II subunit delta OS=Homo sapiens OX=9606 GN=CAMK2D PE=1 SV=3	CAMK2D	1	9.73432e-06	94.09	ITASEALK(1)HPWICQR	3	-2.1026	1	0.448	0.594	0.572	1.394	1.259	1.298
hsa04730 Long-term depression	0.650049	1	1.02	P36507	108	1.663	Up	0.0022007	K	Dual specificity mitogen-activated protein kinase kinase 2 OS=Homo sapiens OX=9606 GN=MAP2K2 PE=1 SV=1	MAP2K2	1	4.9811e-05	95.483	LIHLEIK(1)PAIR	3	-0.84799	1	0.79	0.663	0.705	1.236	1.078	1.275
hsa05130 Pathogenic Escherichia coli infection	0.579199	5	0.99	P35580	1782	1.618	Up	0.00133836	K	Myosin-10 OS=Homo sapiens OX=9606 GN=MYH10 PE=1 SV=3	MYH10	1	0.000848405	90.614	SAAQK(1)SDNAR	2	-0.18483	1	0.811	0.675	0.713	1.145	1.249	1.164
hsa05130 Pathogenic Escherichia coli infection	0.579199	5	0.99	Q7L576	1188	1.882	Up	5.6212e-05	K	Cytoplasmic FMR1-interacting protein 1 OS=Homo sapiens OX=9606 GN=CYFIP1 PE=1 SV=1	CYFIP1	0.999952	0.000231257	89.231	VQK(1)HDGKDEIIK	4	-1.3205	2	0.634	0.688	0.65	1.296	1.192	1.224
hsa05130 Pathogenic Escherichia coli infection	0.579199	5	0.99	P63261	50	2.044	Up	0.00151871	K	Actin, cytoplasmic 2 OS=Homo sapiens OX=9606 GN=ACTG1 PE=1 SV=1	ACTG1	1	1.73645e-08	74.364	HQGVMVGMGQK(1)DSYVGDEAQSK	3	-0.91047	1	0.53	0.605	0.719	1.328	1.267	1.194
hsa05130 Pathogenic Escherichia coli infection	0.579199	5	0.99	P59998	89	1.616	Up	1.98346e-05	K	Actin-related protein 2/3 complex subunit 4 OS=Homo sapiens OX=9606 GN=ARPC4 PE=1 SV=3	ARPC4	1	0.00095295	104.75	ILCHK(1)FMR	3	-0.82501	1	0.745	0.733	0.723	1.215	1.143	1.199
hsa05130 Pathogenic Escherichia coli infection	0.579199	5	0.99	Q14247	161	1.788	Up	3.79e-05	K	Src substrate cortactin OS=Homo sapiens OX=9606 GN=CTTN PE=1 SV=2	CTTN	1	5.64477e-17	133.78	DYSSGFGGK(1)YGVQADR	2	0.1629	2	0.677	0.659	0.712	1.252	1.23	1.179
hsa05130 Pathogenic Escherichia coli infection	0.579199	5	0.99	Q14247	198	1.588	Up	0.00024373	K	Src substrate cortactin OS=Homo sapiens OX=9606 GN=CTTN PE=1 SV=2	CTTN	1	6.55628e-07	113.24	GFGGK(1)YGIDK	3	-0.15514	2	0.734	0.77	0.724	1.251	1.119	1.169
hsa00010 Glycolysis / Gluconeogenesis	0.591636	4	0.99	P00338	222	1.546	Up	0.0049956	K	L-lactate dehydrogenase A chain OS=Homo sapiens OX=9606 GN=LDHA PE=1 SV=2	LDHA	1	0.000110087	92.295	TLHPDLGTDK(1)DK	3	0.56364	1	0.676	0.813	0.781	1.204	1.256	1.05
hsa00010 Glycolysis / Gluconeogenesis	0.591636	4	0.99	P04075	200	1.909	Up	0.00039957	K	Fructose-bisphosphate aldolase A OS=Homo sapiens OX=9606 GN=ALDOA PE=1 SV=2	ALDOA	1	1.06057e-28	125	YASICQQNGIVPIVEPEILPDGDHDLK(1)R	3	-1.6772	8	0.693	0.577	0.681	1.214	1.249	1.262
hsa00010 Glycolysis / Gluconeogenesis	0.591636	4	0.99	P04075	108	1.531	Up	0.00098334	K	Fructose-bisphosphate aldolase A OS=Homo sapiens OX=9606 GN=ALDOA PE=1 SV=2	ALDOA	1	0.000445929	92.866	GGVVGIK(1)VDK	2	0.15856	1	0.727	0.722	0.837	1.193	1.157	1.149
hsa00010 Glycolysis / Gluconeogenesis	0.591636	4	0.99	P18669	100	3.015	Up	6.0532e-07	K	Phosphoglycerate mutase 1 OS=Homo sapiens OX=9606 GN=PGAM1 PE=1 SV=2	PGAM1	1	1.97868e-12	123.76	HYGGLTGLNK(1)AETAAK	4	-0.50082	6	0.457	0.452	0.458	1.395	1.414	1.312
hsa00010 Glycolysis / Gluconeogenesis	0.591636	4	0.99	P47895	423	1.504	Up	1.81114e-05	K	Aldehyde dehydrogenase family 1 member A3 OS=Homo sapiens OX=9606 GN=ALDH1A3 PE=1 SV=2	ALDH1A3	1	3.01099e-05	135.99	FK(1)SIEEVIK	2	-0.13248	1	0.763	0.772	0.78	1.196	1.14	1.145
hsa00640 Propanoate metabolism	0.906841	1	0.45	P00338	222	1.546	Up	0.0049956	K	L-lactate dehydrogenase A chain OS=Homo sapiens OX=9606 GN=LDHA PE=1 SV=2	LDHA	1	0.000110087	92.295	TLHPDLGTDK(1)DK	3	0.56364	1	0.676	0.813	0.781	1.204	1.256	1.05
hsa04151 PI3K-Akt signaling pathway	0.00378084	12	2.28	P15692	149	1.52	Up	0.0183197	K	Vascular endothelial growth factor A OS=Homo sapiens OX=9606 GN=VEGFA PE=1 SV=2	VEGFA	1	0.0158118	68.016	GK(1)GK(1)GQK(1)R	3	0.20842	1	0.619	0.836	0.835	1.054	1.197	1.23
hsa04151 PI3K-Akt signaling pathway	0.00378084	12	2.28	P15692	147	1.52	Up	0.0183197	K	Vascular endothelial growth factor A OS=Homo sapiens OX=9606 GN=VEGFA PE=1 SV=2	VEGFA	1	0.0158118	68.016	GK(1)GK(1)GQK(1)R	3	0.20842	1	0.619	0.836	0.835	1.054	1.197	1.23
hsa04151 PI3K-Akt signaling pathway	0.00378084	12	2.28	P15692	152	1.52	Up	0.0183197	K	Vascular endothelial growth factor A OS=Homo sapiens OX=9606 GN=VEGFA PE=1 SV=2	VEGFA	1	0.0158118	68.016	GK(1)GK(1)GQK(1)R	3	0.20842	1	0.619	0.836	0.835	1.054	1.197	1.23
hsa04151 PI3K-Akt signaling pathway	0.00378084	12	2.28	P18564	548	1.991	Up	0.0032991	K	Integrin beta-6 OS=Homo sapiens OX=9606 GN=ITGB6 PE=1 SV=2	ITGB6	1	9.92231e-07	77.037	HK(1)GLLCGGNGDCDCGECVCR	3	-0.47256	1	0.5	0.688	0.699	1.2	1.299	1.258
hsa04151 PI3K-Akt signaling pathway	0.00378084	12	2.28	P36507	108	1.663	Up	0.0022007	K	Dual specificity mitogen-activated protein kinase kinase 2 OS=Homo sapiens OX=9606 GN=MAP2K2 PE=1 SV=1	MAP2K2	1	4.9811e-05	95.483	LIHLEIK(1)PAIR	3	-0.84799	1	0.79	0.663	0.705	1.236	1.078	1.275
hsa04151 PI3K-Akt signaling pathway	0.00378084	12	2.28	P14625	467	2.375	Up	0.00132479	K	Endoplasmin OS=Homo sapiens OX=9606 GN=HSP90B1 PE=1 SV=1	HSP90B1	1	0.0260932	82.287	K(1)TLDMIK	2	-1.9897	1	0.517	0.571	0.564	1.316	1.312	1.296
hsa04151 PI3K-Akt signaling pathway	0.00378084	12	2.28	P14625	473	1.531	Up	0.0021359	K	Endoplasmin OS=Homo sapiens OX=9606 GN=HSP90B1 PE=1 SV=1	HSP90B1	1	0.0291692	80.438	TLDMIK(1)K	3	-0.98878	2	0.833	0.741	0.715	1.239	1.084	1.181
hsa04151 PI3K-Akt signaling pathway	0.00378084	12	2.28	P23229	144	3.768	Up	1.57151e-05	K	Integrin alpha-6 OS=Homo sapiens OX=9606 GN=ITGA6 PE=1 SV=5	ITGA6	1	3.1719e-06	130.01	QHVNTK(1)QESR	2	1.0391	2	0.354	0.398	0.382	1.474	1.325	1.474
hsa04151 PI3K-Akt signaling pathway	0.00378084	12	2.28	P23229	594	2.852	Up	0.0097615	K	Integrin alpha-6 OS=Homo sapiens OX=9606 GN=ITGA6 PE=1 SV=5	ITGA6	1	0.0014851	102.53	YTQELTLK(1)R	2	0.55207	2	0.382	0.524	0.521	1.331	1.345	1.394
hsa04151 PI3K-Akt signaling pathway	0.00378084	12	2.28	P31946	70	1.526	Up	0.0008628	K	14-3-3 protein beta/alpha OS=Homo sapiens OX=9606 GN=YWHAB PE=1 SV=3	YWHAB	1	1.60397e-05	106.67	VISSIEQK(1)TER	3	-0.051644	2	0.777	0.814	0.701	1.201	1.131	1.165
hsa04151 PI3K-Akt signaling pathway	0.00378084	12	2.28	Q15382	97	1.749	Up	0.000122954	K	GTP-binding protein Rheb OS=Homo sapiens OX=9606 GN=RHEB PE=1 SV=1	RHEB	1	0.0026732	65.842	SFEVIK(1)VIHGK	3	1.1424	1	0.669	0.666	0.743	1.19	1.244	1.201
hsa04151 PI3K-Akt signaling pathway	0.00378084	12	2.28	P62753	243	1.631	Up	0.000121433	K	40S ribosomal protein S6 OS=Homo sapiens OX=9606 GN=RPS6 PE=1 SV=1	RPS6	1	1.94239e-06	121.29	ASTSK(1)SESSQK	2	0.72863	2	0.736	0.685	0.766	1.194	1.197	1.175
hsa04151 PI3K-Akt signaling pathway	0.00378084	12	2.28	P24043	3092	1.918	Up	1.50302e-05	K	Laminin subunit alpha-2 OS=Homo sapiens OX=9606 GN=LAMA2 PE=1 SV=4	LAMA2	1	0.0350388	67.385	GCIRSLK(1)LTK	2	3.4243	1	0.661	0.626	0.658	1.283	1.221	1.227
hsa04151 PI3K-Akt signaling pathway	0.00378084	12	2.28	Q16787	2135	1.622	Up	3.461e-06	K	Laminin subunit alpha-3 OS=Homo sapiens OX=9606 GN=LAMA3 PE=1 SV=2	LAMA3	1	0.000133898	89.507	SAGK(1)TSLVEEAEK	2	-0.15811	2	0.721	0.727	0.746	1.166	1.178	1.214
hsa04151 PI3K-Akt signaling pathway	0.00378084	12	2.28	P02458	1444	3.469	Up	1.93387e-05	K	Collagen alpha-1(II) chain OS=Homo sapiens OX=9606 GN=COL2A1 PE=1 SV=3	COL2A1	1	0.014601	68.915	HTGK(1)WGK	3	-0.79413	1	0.434	0.395	0.388	1.483	1.302	1.437
hsa04151 PI3K-Akt signaling pathway	0.00378084	12	2.28	P17301	261	4.97	Up	7.7205e-05	K	Integrin alpha-2 OS=Homo sapiens OX=9606 GN=ITGA2 PE=1 SV=1	ITGA2	1	5.75495e-08	138.89	K(1)YAYSAASGGR	2	-0.52946	1	0.253	0.307	0.334	1.631	1.406	1.406
hsa05031 Amphetamine addiction	0.793587	1	0.68	Q13557	268	2.448	Up	0.00064196	K	Calcium/calmodulin-dependent protein kinase type II subunit delta OS=Homo sapiens OX=9606 GN=CAMK2D PE=1 SV=3	CAMK2D	1	9.73432e-06	94.09	ITASEALK(1)HPWICQR	3	-2.1026	1	0.448	0.594	0.572	1.394	1.259	1.298
hsa04217 Necroptosis	0.131734	8	1.55	P21796	61	1.877	Up	2.673e-06	K	Voltage-dependent anion-selective channel protein 1 OS=Homo sapiens OX=9606 GN=VDAC1 PE=1 SV=2	VDAC1	1	0.00011548	117.25	VTGSLETK(1)YR	3	1.0352	3	0.663	0.636	0.677	1.244	1.244	1.221
hsa04217 Necroptosis	0.131734	8	1.55	P21796	20	1.506	Up	6.0692e-05	K	Voltage-dependent anion-selective channel protein 1 OS=Homo sapiens OX=9606 GN=VDAC1 PE=1 SV=2	VDAC1	1	5.63016e-11	131.66	DVFTK(1)GYGFGLIK	2	0.76596	2	0.765	0.794	0.754	1.198	1.157	1.128
hsa04217 Necroptosis	0.131734	8	1.55	Q13557	268	2.448	Up	0.00064196	K	Calcium/calmodulin-dependent protein kinase type II subunit delta OS=Homo sapiens OX=9606 GN=CAMK2D PE=1 SV=3	CAMK2D	1	9.73432e-06	94.09	ITASEALK(1)HPWICQR	3	-2.1026	1	0.448	0.594	0.572	1.394	1.259	1.298
hsa04217 Necroptosis	0.131734	8	1.55	O95831	518	1.536	Up	0.00075992	K	Apoptosis-inducing factor 1, mitochondrial OS=Homo sapiens OX=9606 GN=AIFM1 PE=1 SV=1	AIFM1	1	5.47123e-15	123.42	ATAQDNPK(1)SATEQSGTGIR	3	1.6671	1	0.756	0.746	0.778	1.17	1.076	1.255
hsa04217 Necroptosis	0.131734	8	1.55	Q71UI9	8	1.776	Up	7.1996e-08	K	Histone H2A.V OS=Homo sapiens OX=9606 GN=H2AFV PE=1 SV=3	H2AFV	1	5.25348e-06	111.64	AGK(1)DSGK(1)AK(1)AK	2	0.56256	10	0.682	0.683	0.692	1.231	1.214	1.209
hsa04217 Necroptosis	0.131734	8	1.55	Q71UI9	12	1.771	Up	4.7604e-08	K	Histone H2A.V OS=Homo sapiens OX=9606 GN=H2AFV PE=1 SV=3	H2AFV	1	5.25348e-06	111.64	AGK(1)DSGK(1)AK(1)AK	2	0.56256	8	0.684	0.688	0.689	1.228	1.219	1.203
hsa04217 Necroptosis	0.131734	8	1.55	Q71UI9	14	1.84	Up	6.056e-07	K	Histone H2A.V OS=Homo sapiens OX=9606 GN=H2AFV PE=1 SV=3	H2AFV	1	0.00142022	96.464	AGK(1)DSGK(1)AK(1)AK	2	0.56256	2	0.675	0.674	0.655	1.23	1.211	1.247
hsa04217 Necroptosis	0.131734	8	1.55	Q9H444	14	1.582	Up	0.0041192	K	Charged multivesicular body protein 4b OS=Homo sapiens OX=9606 GN=CHMP4B PE=1 SV=1	CHMP4B	1	3.09123e-05	113.93	LFGAGGGK(1)AGK	3	-0.24622	2	0.803	0.777	0.655	1.145	1.286	1.105
hsa04217 Necroptosis	0.131734	8	1.55	P09429	90	1.761	Up	0.000121985	K	High mobility group protein B1 OS=Homo sapiens OX=9606 GN=HMGB1 PE=1 SV=3	HMGB1	1	0.014499	80.688	FK(1)DPNAPK	2	-0.291	2	0.677	0.691	0.704	1.289	1.223	1.136
hsa04217 Necroptosis	0.131734	8	1.55	Q96KK5	37	1.556	Up	0.00027896	K	Histone H2A type 1-H OS=Homo sapiens OX=9606 GN=HIST1H2AH PE=1 SV=3	HIST1H2AH	1	0.012122	96.311	K(1)GNYAER	2	0.80708	1	0.728	0.743	0.79	1.238	1.142	1.138
hsa04217 Necroptosis	0.131734	8	1.55	Q96KK5	96	1.532	Up	0.000135907	K	Histone H2A type 1-H OS=Homo sapiens OX=9606 GN=HIST1H2AH PE=1 SV=3	HIST1H2AH	1	3.40253e-08	141.58	NDEELNK(1)LLGK	2	-0.23047	2	0.728	0.792	0.764	1.153	1.204	1.141
hsa04217 Necroptosis	0.131734	8	1.55	Q96KK5	126	1.639	Up	7.7928e-05	K	Histone H2A type 1-H OS=Homo sapiens OX=9606 GN=HIST1H2AH PE=1 SV=3	HIST1H2AH	1	0.00072571	91.318	TESHHK(1)AK	3	0.69454	6	0.726	0.693	0.76	1.222	1.176	1.174
hsa04217 Necroptosis	0.131734	8	1.55	P0C0S5	8	2.197	Up	4.9094e-07	K	Histone H2A.Z OS=Homo sapiens OX=9606 GN=H2AZ1 PE=1 SV=2	H2AZ1	1	2.41356e-07	111.64	AGK(1)DSGK(1)AK(1)TK	2	0.79948	12	0.591	0.582	0.583	1.323	1.257	1.278
hsa04217 Necroptosis	0.131734	8	1.55	P0C0S5	12	2.225	Up	3.9617e-07	K	Histone H2A.Z OS=Homo sapiens OX=9606 GN=H2AZ1 PE=1 SV=2	H2AZ1	1	2.41356e-07	111.64	AGK(1)DSGK(1)AK(1)TK	2	0.79948	10	0.585	0.579	0.575	1.326	1.264	1.279
hsa04217 Necroptosis	0.131734	8	1.55	P0C0S5	5	1.669	Up	5.8561e-05	K	Histone H2A.Z OS=Homo sapiens OX=9606 GN=H2AZ1 PE=1 SV=2	H2AZ1	1	2.41356e-07	111.64	AGGK(1)AGK(1)DSGK(1)AK(1)TK	2	0.11281	10	0.749	0.714	0.689	1.227	1.164	1.201
hsa04217 Necroptosis	0.131734	8	1.55	P0C0S5	14	2.729	Up	2.1717e-06	K	Histone H2A.Z OS=Homo sapiens OX=9606 GN=H2AZ1 PE=1 SV=2	H2AZ1	1	2.41356e-07	106.57	AGK(1)DSGK(1)AK(1)TK	2	0.79948	4	0.511	0.491	0.48	1.402	1.295	1.348
hsa05230 Central carbon metabolism in cancer	0.311625	3	1.53	P00338	222	1.546	Up	0.0049956	K	L-lactate dehydrogenase A chain OS=Homo sapiens OX=9606 GN=LDHA PE=1 SV=2	LDHA	1	0.000110087	92.295	TLHPDLGTDK(1)DK	3	0.56364	1	0.676	0.813	0.781	1.204	1.256	1.05
hsa05230 Central carbon metabolism in cancer	0.311625	3	1.53	P36507	108	1.663	Up	0.0022007	K	Dual specificity mitogen-activated protein kinase kinase 2 OS=Homo sapiens OX=9606 GN=MAP2K2 PE=1 SV=1	MAP2K2	1	4.9811e-05	95.483	LIHLEIK(1)PAIR	3	-0.84799	1	0.79	0.663	0.705	1.236	1.078	1.275
hsa05230 Central carbon metabolism in cancer	0.311625	3	1.53	P18669	100	3.015	Up	6.0532e-07	K	Phosphoglycerate mutase 1 OS=Homo sapiens OX=9606 GN=PGAM1 PE=1 SV=2	PGAM1	1	1.97868e-12	123.76	HYGGLTGLNK(1)AETAAK	4	-0.50082	6	0.457	0.452	0.458	1.395	1.414	1.312

## Sheet: Down
KEGG pathway	Mapping	Background	All Mapping	All Background	Fold enrichment	Fisher's exact test p value	-log10(p value)	Related proteins
hsa00072 Synthesis and degradation of ketone bodies	4	4	314	1158	3.69	0.00533098	2.27	Q01581 P35914 P54868 P24752
hsa04659 Th17 cell differentiation	7	10	314	1158	2.58	0.0055688	2.25	Q04206 P42224 P08238 P63098 Q58FF8 P07900 P35869
hsa05031 Amphetamine addiction	7	12	314	1158	2.15	0.0218051	1.66	P62136 P63092 P17252 P63098 Q13557 Q13547 Q9UD71
hsa00280 Valine, leucine and isoleucine degradation	11	23	314	1158	1.76	0.0258145	1.59	P09622 P54868 P24752 P40939 P55084 Q01581 Q6NVY1 P42765 P35914 Q02252 P05091
hsa04625 C-type lectin receptor signaling pathway	6	10	314	1158	2.21	0.0287451	1.54	Q04206 P42224 P63098 Q14573 Q06124 P61586
hsa05166 Human T-cell leukemia virus 1 infection	13	29	314	1158	1.65	0.0288149	1.54	Q09472 O43684 O14980 P45880 P06400 Q9Y277 P43487 Q04206 O14757 P27824 P63098 Q9Y490 P62826
hsa05120 Epithelial cell signaling in Helicobacter pylori infection	7	13	314	1158	1.99	0.036474	1.44	Q04206 P60953 P21281 P38606 P36543 Q06124 P08581
hsa05110 Vibrio cholerae infection	7	13	314	1158	1.99	0.036474	1.44	P63092 P17252 P21281 P60468 P38606 P63261 P36543
hsa04350 TGF-beta signaling pathway	5	8	314	1158	2.3	0.0378206	1.42	Q09472 P67775 P63208 Q7Z3T8 P61586
hsa04520 Adherens junction	9	19	314	1158	1.75	0.0456825	1.34	Q09472 P60953 O60716 P63261 P24666 P18206 P35221 P61586 P08581
hsa05132 Salmonella infection	10	22	314	1158	1.68	0.0481713	1.32	P21333 P60953 O75369 Q04206 Q14204 P35080 P63261 Q9H0B6 O15143 P07737
hsa04721 Synaptic vesicle cycle	6	11	314	1158	2.01	0.049095	1.31	P21281 P38606 P50570 P36543 Q00610 P53675
hsa03450 Non-homologous end-joining	4	6	314	1158	2.46	0.049433	1.31	Q92878 P12956 P39748 P78527

## Sheet: Down Pathway2Protein
KEGG pathway	Fisher's exact test p value	Mapping	Fold enrichment	Protein accession	Position	Ratio	Regulated Type	P value	Amino acid	Protein description	Gene name	Localization probability	PEP	Score	Modified sequence	Charge	Mass error [ppm]	MS/MS Count	MKN_45C1	MKN_45C2	MKN_45C3	MKN_45S1	MKN_45S2	MKN_45S3
hsa00450 Selenocompound metabolism	0.203789	3	1.84	P49903	341	0.44	Down	3.5775e-06	K	Selenide, water dikinase 1 OS=Homo sapiens OX=9606 GN=SEPHS1 PE=1 SV=2	SEPHS1	1	0.0142304	72.2	FCAEIK(1)SPK	2	0.66242	2	1.537	1.468	1.52	0.635	0.688	0.668
hsa00450 Selenocompound metabolism	0.203789	3	1.84	Q16881	574	0.62	Down	0.000136362	K	Thioredoxin reductase 1, cytoplasmic OS=Homo sapiens OX=9606 GN=TXNRD1 PE=1 SV=3	TXNRD1	1	1.22936e-07	102.4	CYAK(1)IICNTK	2	0.31497	2	1.238	1.324	1.328	0.786	0.784	0.843
hsa00450 Selenocompound metabolism	0.203789	3	1.84	Q99611	391	0.546	Down	0.00020436	K	Selenide, water dikinase 2 OS=Homo sapiens OX=9606 GN=SEPHS2 PE=1 SV=3	SEPHS2	1	0.00629535	65.404	FCSEIK(1)SSK	3	0.27675	1	1.322	1.396	1.409	0.713	0.724	0.816
hsa04622 RIG-I-like receptor signaling pathway	0.850823	1	0.61	Q04206	122	0.545	Down	0.0071434	K	Transcription factor p65 OS=Homo sapiens OX=9606 GN=RELA PE=1 SV=2	RELA	1	3.64055e-22	149.32	CIHSFQNLGIQCVK(1)K	3	0.47742	1	1.382	1.379	1.378	0.794	0.785	0.676
hsa04622 RIG-I-like receptor signaling pathway	0.850823	1	0.61	Q04206	195	0.657	Down	4.2829e-05	K	Transcription factor p65 OS=Homo sapiens OX=9606 GN=RELA PE=1 SV=2	RELA	1	0.00217284	81.48	APNTAELK(1)ICR	2	-0.29332	1	1.29	1.233	1.264	0.806	0.824	0.857
hsa05224 Breast cancer	0.921088	1	0.46	P06400	65	0.464	Down	0.002224	K	Retinoblastoma-associated protein OS=Homo sapiens OX=9606 GN=RB1 PE=1 SV=2	RB1	1	0.00150538	94.114	LK(1)IPDHVR	3	-0.34904	1	1.381	1.521	1.526	0.796	0.554	0.706
hsa03008 Ribosome biogenesis in eukaryotes	0.0860547	10	1.54	O14980	103	0.351	Down	2.2658e-06	K	Exportin-1 OS=Homo sapiens OX=9606 GN=XPO1 PE=1 SV=1	XPO1	1	0.00322946	107.79	NQCEGIK(1)K	3	-2.6199	2	1.685	1.659	1.58	0.601	0.573	0.553
hsa03008 Ribosome biogenesis in eukaryotes	0.0860547	10	1.54	O14980	122	0.347	Down	8.8605e-07	K	Exportin-1 OS=Homo sapiens OX=9606 GN=XPO1 PE=1 SV=1	XPO1	1	2.0108e-07	125.53	TSSDPTCVEK(1)EK	3	-1.7379	2	1.706	1.593	1.643	0.587	0.569	0.558
hsa03008 Ribosome biogenesis in eukaryotes	0.0860547	10	1.54	Q14692	728	0.581	Down	0.0065032	K	Ribosome biogenesis protein BMS1 homolog OS=Homo sapiens OX=9606 GN=BMS1 PE=1 SV=1	BMS1	1	0.00318317	69.815	HK(1)ADSLDCSR	3	-0.60432	1	1.406	1.486	1.134	0.881	0.729	0.728
hsa03008 Ribosome biogenesis in eukaryotes	0.0860547	10	1.54	Q9Y3A5	33	0.61	Down	8.4875e-05	K	Ribosome maturation protein SBDS OS=Homo sapiens OX=9606 GN=SBDS PE=1 SV=4	SBDS	1	0.000916641	107.79	FEIACYK(1)NK	2	-0.73821	2	1.282	1.312	1.333	0.836	0.803	0.757
hsa03008 Ribosome biogenesis in eukaryotes	0.0860547	10	1.54	Q9Y3A5	125	0.318	Down	1.59596e-05	K	Ribosome maturation protein SBDS OS=Homo sapiens OX=9606 GN=SBDS PE=1 SV=4	SBDS	1	6.05362e-05	138.08	CVNPETK(1)R	2	-2.5384	1	1.73	1.732	1.626	0.554	0.563	0.499
hsa03008 Ribosome biogenesis in eukaryotes	0.0860547	10	1.54	P22087	102	0.431	Down	3.7804e-05	K	rRNA 2'-O-methyltransferase fibrillarin OS=Homo sapiens OX=9606 GN=FBL PE=1 SV=2	FBL	1	0.006593	64.82	GK(1)EDALVTK	3	0.56476	1	1.614	1.463	1.488	0.653	0.625	0.69
hsa03008 Ribosome biogenesis in eukaryotes	0.0860547	10	1.54	Q9Y2X3	444	0.551	Down	0.000139718	K	Nucleolar protein 58 OS=Homo sapiens OX=9606 GN=NOP58 PE=1 SV=1	NOP58	0.999998	1.52763e-05	100.13	K(1)IEQVDKEDEITEK	3	-0.10353	1	1.403	1.352	1.361	0.724	0.818	0.726
hsa03008 Ribosome biogenesis in eukaryotes	0.0860547	10	1.54	Q9BZE4	332	0.15	Down	9.7261e-08	K	Nucleolar GTP-binding protein 1 OS=Homo sapiens OX=9606 GN=GTPBP4 PE=1 SV=3	GTPBP4	1	0.00532492	96.171	VK(1)TEACDR	2	2.2313	1	2.029	2.082	2.009	0.302	0.319	0.295
hsa03008 Ribosome biogenesis in eukaryotes	0.0860547	10	1.54	Q92979	70	0.504	Down	0.00180324	K	Ribosomal RNA small subunit methyltransferase NEP1 OS=Homo sapiens OX=9606 GN=EMG1 PE=1 SV=4	EMG1	1	0.0081807	79.116	HK(1)SILLK	3	-1.4714	1	1.37	1.446	1.466	0.827	0.603	0.728
hsa03008 Ribosome biogenesis in eukaryotes	0.0860547	10	1.54	Q9H0D6	259	0.605	Down	8.4766e-05	K	5'-3' exoribonuclease 2 OS=Homo sapiens OX=9606 GN=XRN2 PE=1 SV=1	XRN2	0.998612	0.0111026	60.064	EEFK(0.001)PNK(0.999)PK	3	1.6656	1	1.351	1.313	1.281	0.825	0.807	0.753
hsa03008 Ribosome biogenesis in eukaryotes	0.0860547	10	1.54	Q8TED0	80	0.437	Down	3.6236e-05	K	U3 small nucleolar RNA-associated protein 15 homolog OS=Homo sapiens OX=9606 GN=UTP15 PE=1 SV=3	UTP15	1	7.81662e-05	105.19	FK(1)DTAYCATFR	2	-2.1365	1	1.507	1.43	1.602	0.671	0.68	0.631
hsa03008 Ribosome biogenesis in eukaryotes	0.0860547	10	1.54	P62826	123	0.484	Down	1.2707e-06	K	GTP-binding nuclear protein Ran OS=Homo sapiens OX=9606 GN=RAN PE=1 SV=3	RAN	1	1.12796e-19	139.29	VCENIPIVLCGNK(1)VDIK	3	-0.81793	3	1.435	1.493	1.423	0.688	0.703	0.715
hsa04360 Axon guidance	0.146295	8	1.48	P17252	575	0.62	Down	0.0034987	K	Protein kinase C alpha type OS=Homo sapiens OX=9606 GN=PRKCA PE=1 SV=4	PRKCA	1	0.00296928	74.92	GLMTK(1)HPAK	3	-0.94664	1	1.458	1.172	1.271	0.802	0.869	0.748
hsa04360 Axon guidance	0.146295	8	1.48	P23528	45	0.342	Down	2.6776e-06	K	Cofilin-1 OS=Homo sapiens OX=9606 GN=CFL1 PE=1 SV=3	CFL1	1	0.00127427	101.39	K(1)NIILEEGK	2	0.23308	5	1.734	1.655	1.576	0.555	0.587	0.557
hsa04360 Axon guidance	0.146295	8	1.48	P23528	144	0.536	Down	2.1185e-06	K	Cofilin-1 OS=Homo sapiens OX=9606 GN=CFL1 PE=1 SV=3	CFL1	1	5.44334e-18	156	HELQANCYEEVK(1)DR	3	0.045666	6	1.41	1.416	1.341	0.744	0.751	0.739
hsa04360 Axon guidance	0.146295	8	1.48	P23528	44	0.401	Down	1.80522e-05	K	Cofilin-1 OS=Homo sapiens OX=9606 GN=CFL1 PE=1 SV=3	CFL1	1	4.72599e-11	153.95	AVLFCLSEDK(1)K	2	-0.65835	3	1.595	1.575	1.523	0.642	0.654	0.585
hsa04360 Axon guidance	0.146295	8	1.48	P23528	78	0.558	Down	0.00053507	K	Cofilin-1 OS=Homo sapiens OX=9606 GN=CFL1 PE=1 SV=3	CFL1	1	0.0261833	73.573	MLPDK(1)DCR	2	-0.9076	1	1.372	1.381	1.339	0.759	0.838	0.688
hsa04360 Axon guidance	0.146295	8	1.48	P60953	153	0.577	Down	0.000137319	K	Cell division control protein 42 homolog OS=Homo sapiens OX=9606 GN=CDC42 PE=1 SV=2	CDC42	1	2.59121e-13	142.45	AVK(1)YVECSALTQK	2	-0.94283	2	1.369	1.297	1.364	0.804	0.724	0.799
hsa04360 Axon guidance	0.146295	8	1.48	P63098	91	0.609	Down	2.1079e-05	K	Calcineurin subunit B type 1 OS=Homo sapiens OX=9606 GN=PPP3R1 PE=1 SV=2	PPP3R1	0.992001	0.0310274	51.528	GDK(0.008)EQK(0.992)LR	3	1.0201	1	1.276	1.344	1.307	0.772	0.811	0.808
hsa04360 Axon guidance	0.146295	8	1.48	Q13557	292	0.489	Down	0.00073807	K	Calcium/calmodulin-dependent protein kinase type II subunit delta OS=Homo sapiens OX=9606 GN=CAMK2D PE=1 SV=3	CAMK2D	1	0.0244498	51.436	QETVDCLK(1)K	3	0.21401	1	1.637	1.358	1.344	0.655	0.756	0.712
hsa04360 Axon guidance	0.146295	8	1.48	Q06124	178	0.256	Down	1.83063e-05	K	Tyrosine-protein phosphatase non-receptor type 11 OS=Homo sapiens OX=9606 GN=PTPN11 PE=1 SV=2	PTPN11	1	0.00118893	79.346	CQELK(1)YDVGGGER	2	0.10773	2	1.739	1.852	1.824	0.421	0.505	0.46
hsa04360 Axon guidance	0.146295	8	1.48	P61586	104	0.588	Down	4.1025e-05	K	Transforming protein RhoA OS=Homo sapiens OX=9606 GN=RHOA PE=1 SV=1	RHOA	1	5.97999e-08	100.02	WTPEVK(1)HFCPNVPIILVGNK	4	0.21964	2	1.315	1.323	1.356	0.779	0.749	0.819
hsa04360 Axon guidance	0.146295	8	1.48	P08581	1215	0.628	Down	0.00040379	K	Hepatocyte growth factor receptor OS=Homo sapiens OX=9606 GN=MET PE=1 SV=4	MET	1	0.00254286	66.267	NCMLDEK(1)FTVK	3	0.751	1	1.339	1.257	1.279	0.794	0.872	0.766
hsa04919 Thyroid hormone signaling pathway	0.235665	7	1.36	Q09472	1590	0.62	Down	0.00020271	K	Histone acetyltransferase p300 OS=Homo sapiens OX=9606 GN=EP300 PE=1 SV=2	EP300	1	0.00029002	91.867	LYATMEK(1)HK	3	-0.76884	4	1.377	1.286	1.238	0.838	0.789	0.79
hsa04919 Thyroid hormone signaling pathway	0.235665	7	1.36	P17252	575	0.62	Down	0.0034987	K	Protein kinase C alpha type OS=Homo sapiens OX=9606 GN=PRKCA PE=1 SV=4	PRKCA	1	0.00296928	74.92	GLMTK(1)HPAK	3	-0.94664	1	1.458	1.172	1.271	0.802	0.869	0.748
hsa04919 Thyroid hormone signaling pathway	0.235665	7	1.36	P42224	152	0.61	Down	0.00037983	K	Signal transducer and activator of transcription 1-alpha/beta OS=Homo sapiens OX=9606 GN=STAT1 PE=1 SV=2	STAT1	1	0.00351683	63.091	DK(1)VMCIEHEIK	3	-0.25958	1	1.219	1.385	1.319	0.803	0.829	0.762
hsa04919 Thyroid hormone signaling pathway	0.235665	7	1.36	P63261	291	0.532	Down	4.2125e-05	K	Actin, cytoplasmic 2 OS=Homo sapiens OX=9606 GN=ACTG1 PE=1 SV=1	ACTG1	1	1.10521e-10	103.84	K(1)DLYANTVLSGGTTMYPGIADR	2	0.54304	5	1.347	1.356	1.477	0.746	0.756	0.72
hsa04919 Thyroid hormone signaling pathway	0.235665	7	1.36	Q13547	412	0.47	Down	0.0032599	K	Histone deacetylase 1 OS=Homo sapiens OX=9606 GN=HDAC1 PE=1 SV=1	HDAC1	1	0.00172616	93.096	ISICSSDK(1)R	2	-1.0844	1	1.453	1.472	1.484	0.747	0.681	0.645
hsa04919 Thyroid hormone signaling pathway	0.235665	7	1.36	Q6A1A2	277	0.634	Down	0.006397	K	Putative 3-phosphoinositide-dependent protein kinase 2 OS=Homo sapiens OX=9606 GN=PDPK2P PE=5 SV=1	PDPK2P	1	0.00344264	56.205	LEYDFPEK(1)FFPK	3	1.5294	1	1.1	1.286	1.462	0.823	0.773	0.842
hsa04919 Thyroid hormone signaling pathway	0.235665	7	1.36	Q15596	785	0.519	Down	2.9215e-06	K	Nuclear receptor coactivator 2 OS=Homo sapiens OX=9606 GN=NCOA2 PE=1 SV=2	NCOA2	1	0.00137976	111.61	LIAMK(1)TEK	3	-0.41177	2	1.445	1.407	1.373	0.717	0.752	0.725
hsa00562 Inositol phosphate metabolism	0.203789	3	1.84	P78356	26	0.66	Down	0.000122336	K	Phosphatidylinositol 5-phosphate 4-kinase type-2 beta OS=Homo sapiens OX=9606 GN=PIP4K2B PE=1 SV=1	PIP4K2B	1	0.0249697	64.757	K(1)HFVCQK	3	-0.77866	1	1.316	1.266	1.198	0.832	0.842	0.821
hsa00562 Inositol phosphate metabolism	0.203789	3	1.84	Q8TBX8	101	0.404	Down	2.1405e-05	K	Phosphatidylinositol 5-phosphate 4-kinase type-2 gamma OS=Homo sapiens OX=9606 GN=PIP4K2C PE=1 SV=3	PIP4K2C	1	0.00146113	87.184	FK(1)EYCPQVFR	2	-1.1875	1	1.494	1.627	1.556	0.659	0.638	0.592
hsa00562 Inositol phosphate metabolism	0.203789	3	1.84	Q02252	52	0.553	Down	0.00015581	K	Methylmalonate-semialdehyde dehydrogenase [acylating], mitochondrial OS=Homo sapiens OX=9606 GN=ALDH6A1 PE=1 SV=2	ALDH6A1	1	0.0431707	65.278	FVESK(1)SDK	2	2.3889	1	1.311	1.436	1.36	0.807	0.723	0.743
hsa00562 Inositol phosphate metabolism	0.203789	3	1.84	Q02252	364	0.604	Down	0.0058015	K	Methylmalonate-semialdehyde dehydrogenase [acylating], mitochondrial OS=Homo sapiens OX=9606 GN=ALDH6A1 PE=1 SV=2	ALDH6A1	1	0.00012552	55.051	VNAGDQPGADLGPLITPQAK(1)ER	3	-1.9224	1	1.419	1.317	1.219	0.896	0.819	0.674
hsa00562 Inositol phosphate metabolism	0.203789	3	1.84	Q02252	331	0.425	Down	0.00072338	K	Methylmalonate-semialdehyde dehydrogenase [acylating], mitochondrial OS=Homo sapiens OX=9606 GN=ALDH6A1 PE=1 SV=2	ALDH6A1	1	0.000862761	80.69	K(1)WLPELVEHAK	3	-0.56312	1	1.597	1.582	1.405	0.569	0.625	0.753
hsa05034 Alcoholism	0.51663	9	1.04	O75367	304	0.372	Down	4.0974e-05	K	Core histone macro-H2A.1 OS=Homo sapiens OX=9606 GN=H2AFY PE=1 SV=4	H2AFY	1	0.000144859	116.24	NCLALADDK(1)K	2	0.39339	2	1.634	1.692	1.494	0.556	0.613	0.622
hsa05034 Alcoholism	0.51663	9	1.04	O75367	295	0.546	Down	2.6924e-06	K	Core histone macro-H2A.1 OS=Homo sapiens OX=9606 GN=H2AFY PE=1 SV=4	H2AFY	1	5.52362e-05	96.773	TVK(1)NCLALADDKK	3	-0.98776	1	1.421	1.369	1.343	0.754	0.74	0.762
hsa05034 Alcoholism	0.51663	9	1.04	P63092	8	0.162	Down	1.3942e-07	K	Guanine nucleotide-binding protein G(s) subunit alpha isoforms short OS=Homo sapiens OX=9606 GN=GNAS PE=1 SV=1	GNAS	1	0.00017262	97.463	GCLGNSK(1)TEDQR	2	-0.98053	1	2.08	2.045	1.911	0.324	0.323	0.33
hsa05034 Alcoholism	0.51663	9	1.04	P16104	134	0.653	Down	0.00117605	K	Histone H2AX OS=Homo sapiens OX=9606 GN=H2AFX PE=1 SV=2	H2AFX	1	0.0078107	85.359	APSGGK(1)K	3	-0.041331	1	1.186	1.391	1.219	0.85	0.81	0.818
hsa05034 Alcoholism	0.51663	9	1.04	Q9UD71	152	0.452	Down	0.00023867	K	Protein phosphatase 1 regulatory subunit 1B OS=Homo sapiens OX=9606 GN=PPP1R1B PE=1 SV=2	PPP1R1B	1	4.97004e-20	100.86	QSAGQK(1)TTCGQGLEGPWERPPPLDESER	3	-0.61595	2	1.578	1.531	1.369	0.662	0.628	0.736
hsa05034 Alcoholism	0.51663	9	1.04	P84243	28	0.53	Down	3.3766e-07	K	Histone H3.3 OS=Homo sapiens OX=9606 GN=H3-3A PE=1 SV=2	H3-3A	1	0.000237623	110.98	K(1)SAPSTGGVK(1)K	2	-0.62162	13	1.416	1.375	1.394	0.729	0.742	0.749
hsa05034 Alcoholism	0.51663	9	1.04	P84243	37	0.422	Down	4.7532e-06	K	Histone H3.3 OS=Homo sapiens OX=9606 GN=H3-3A PE=1 SV=2	H3-3A	1	0.000237623	93.623	K(1)SAPSTGGVK(1)K	2	-0.62162	5	1.579	1.45	1.573	0.637	0.664	0.641
hsa05034 Alcoholism	0.51663	9	1.04	P62136	41	0.561	Down	0.000119643	K	Serine/threonine-protein phosphatase PP1-alpha catalytic subunit OS=Homo sapiens OX=9606 GN=PPP1CA PE=1 SV=1	PPP1CA	1	0.0182236	88.954	GLCLK(1)SR	2	0.99693	1	1.421	1.279	1.382	0.769	0.732	0.791
hsa05034 Alcoholism	0.51663	9	1.04	Q99525	6	0.281	Down	3.7489e-07	K	Histone H4-like protein type G OS=Homo sapiens OX=9606 GN=HIST1H4G PE=1 SV=1	HIST1H4G	1	1.63111e-05	105.19	GK(1)AGK(1)GLGK(1)GGAK	2	-0.36748	2	1.814	1.733	1.733	0.489	0.483	0.513
hsa05034 Alcoholism	0.51663	9	1.04	Q99525	13	0.608	Down	9.8826e-05	K	Histone H4-like protein type G OS=Homo sapiens OX=9606 GN=HIST1H4G PE=1 SV=1	HIST1H4G	1	1.63111e-05	105.19	GLGK(1)GGAK(1)CHR	3	1.0158	10	1.343	1.325	1.266	0.821	0.756	0.815
hsa05034 Alcoholism	0.51663	9	1.04	Q99525	9	0.281	Down	3.7489e-07	K	Histone H4-like protein type G OS=Homo sapiens OX=9606 GN=HIST1H4G PE=1 SV=1	HIST1H4G	1	1.63111e-05	105.19	GK(1)AGK(1)GLGK(1)GGAK	2	-0.36748	2	1.814	1.733	1.733	0.489	0.483	0.513
hsa05034 Alcoholism	0.51663	9	1.04	Q13547	412	0.47	Down	0.0032599	K	Histone deacetylase 1 OS=Homo sapiens OX=9606 GN=HDAC1 PE=1 SV=1	HDAC1	1	0.00172616	93.096	ISICSSDK(1)R	2	-1.0844	1	1.453	1.472	1.484	0.747	0.681	0.645
hsa05034 Alcoholism	0.51663	9	1.04	Q71DI3	28	0.443	Down	1.6986e-06	K	Histone H3.2 OS=Homo sapiens OX=9606 GN=HIST2H3A PE=1 SV=3	HIST2H3A	1	1.40381e-05	123.01	K(1)SAPATGGVK(0.953)K(0.047)PHR	3	-0.37205	17	1.551	1.487	1.475	0.667	0.648	0.685
hsa05034 Alcoholism	0.51663	9	1.04	Q71DI3	37	0.365	Down	1.5266e-07	K	Histone H3.2 OS=Homo sapiens OX=9606 GN=HIST2H3A PE=1 SV=3	HIST2H3A	1	2.2779e-05	124.42	SAPATGGVK(1)K	2	-0.35007	6	1.664	1.609	1.582	0.587	0.593	0.591
hsa05204 Chemical carcinogenesis	0.609198	3	1.01	P11766	107	0.231	Down	3.6245e-05	K	Alcohol dehydrogenase class-3 OS=Homo sapiens OX=9606 GN=ADH5 PE=1 SV=4	ADH5	1	1.45045e-06	115.57	FCLNPK(1)TNLCQK	2	0.14803	1	2	1.774	1.804	0.398	0.407	0.482
hsa05204 Chemical carcinogenesis	0.609198	3	1.01	P16152	148	0.562	Down	3.0696e-06	K	Carbonyl reductase [NADPH] 1 OS=Homo sapiens OX=9606 GN=CBR1 PE=1 SV=3	CBR1	1	1.16643e-09	133.16	ALK(1)SCSPELQQK	2	0.15889	2	1.322	1.372	1.382	0.781	0.749	0.762
hsa05204 Chemical carcinogenesis	0.609198	3	1.01	P47895	48	0.492	Down	6.4523e-05	K	Aldehyde dehydrogenase family 1 member A3 OS=Homo sapiens OX=9606 GN=ALDH1A3 PE=1 SV=2	ALDH1A3	1	0.00157174	86.911	K(1)FATCNPSTR	2	-0.43183	1	1.53	1.442	1.355	0.742	0.696	0.693
hsa05223 Non-small cell lung cancer	0.45865	3	1.23	P17252	575	0.62	Down	0.0034987	K	Protein kinase C alpha type OS=Homo sapiens OX=9606 GN=PRKCA PE=1 SV=4	PRKCA	1	0.00296928	74.92	GLMTK(1)HPAK	3	-0.94664	1	1.458	1.172	1.271	0.802	0.869	0.748
hsa05223 Non-small cell lung cancer	0.45865	3	1.23	P06400	65	0.464	Down	0.002224	K	Retinoblastoma-associated protein OS=Homo sapiens OX=9606 GN=RB1 PE=1 SV=2	RB1	1	0.00150538	94.114	LK(1)IPDHVR	3	-0.34904	1	1.381	1.521	1.526	0.796	0.554	0.706
hsa05223 Non-small cell lung cancer	0.45865	3	1.23	Q6A1A2	277	0.634	Down	0.006397	K	Putative 3-phosphoinositide-dependent protein kinase 2 OS=Homo sapiens OX=9606 GN=PDPK2P PE=5 SV=1	PDPK2P	1	0.00344264	56.205	LEYDFPEK(1)FFPK	3	1.5294	1	1.1	1.286	1.462	0.823	0.773	0.842
hsa04928 Parathyroid hormone synthesis, secretion and action	0.274865	4	1.48	P63092	8	0.162	Down	1.3942e-07	K	Guanine nucleotide-binding protein G(s) subunit alpha isoforms short OS=Homo sapiens OX=9606 GN=GNAS PE=1 SV=1	GNAS	1	0.00017262	97.463	GCLGNSK(1)TEDQR	2	-0.98053	1	2.08	2.045	1.911	0.324	0.323	0.33
hsa04928 Parathyroid hormone synthesis, secretion and action	0.274865	4	1.48	P17252	575	0.62	Down	0.0034987	K	Protein kinase C alpha type OS=Homo sapiens OX=9606 GN=PRKCA PE=1 SV=4	PRKCA	1	0.00296928	74.92	GLMTK(1)HPAK	3	-0.94664	1	1.458	1.172	1.271	0.802	0.869	0.748
hsa04928 Parathyroid hormone synthesis, secretion and action	0.274865	4	1.48	Q14573	258	0.471	Down	3.6728e-06	K	Inositol 1,4,5-trisphosphate receptor type 3 OS=Homo sapiens OX=9606 GN=ITPR3 PE=1 SV=2	ITPR3	1	0.000333363	105.13	FLTCDEYK(1)GK	2	-1.2035	2	1.529	1.425	1.454	0.707	0.674	0.693
hsa04928 Parathyroid hormone synthesis, secretion and action	0.274865	4	1.48	P61586	104	0.588	Down	4.1025e-05	K	Transforming protein RhoA OS=Homo sapiens OX=9606 GN=RHOA PE=1 SV=1	RHOA	1	5.97999e-08	100.02	WTPEVK(1)HFCPNVPIILVGNK	4	0.21964	2	1.315	1.323	1.356	0.779	0.749	0.819
hsa04976 Bile secretion	0.921088	1	0.46	P63092	8	0.162	Down	1.3942e-07	K	Guanine nucleotide-binding protein G(s) subunit alpha isoforms short OS=Homo sapiens OX=9606 GN=GNAS PE=1 SV=1	GNAS	1	0.00017262	97.463	GCLGNSK(1)TEDQR	2	-0.98053	1	2.08	2.045	1.911	0.324	0.323	0.33
hsa00650 Butanoate metabolism	0.104349	5	1.84	Q01581	46	0.589	Down	0.00028449	K	Hydroxymethylglutaryl-CoA synthase, cytoplasmic OS=Homo sapiens OX=9606 GN=HMGCS1 PE=1 SV=2	HMGCS1	1	0.000108216	82.349	YDGVDAGK(1)YTIGLGQAK	3	0.48089	1	1.369	1.3	1.32	0.727	0.781	0.841
hsa00650 Butanoate metabolism	0.104349	5	1.84	Q01581	239	0.441	Down	1.9395e-06	K	Hydroxymethylglutaryl-CoA synthase, cytoplasmic OS=Homo sapiens OX=9606 GN=HMGCS1 PE=1 SV=2	HMGCS1	1	0.00927854	73.665	K(1)IHAQWQK	3	1.6118	1	1.512	1.486	1.52	0.636	0.684	0.674
hsa00650 Butanoate metabolism	0.104349	5	1.84	Q01581	409	0.372	Down	0.00050154	K	Hydroxymethylglutaryl-CoA synthase, cytoplasmic OS=Homo sapiens OX=9606 GN=HMGCS1 PE=1 SV=2	HMGCS1	1	1.88095e-06	130.1	ITASLCDLK(1)SR	3	-0.19613	2	1.635	1.652	1.534	0.555	0.713	0.525
hsa00650 Butanoate metabolism	0.104349	5	1.84	P35914	137	0.498	Down	0.00026353	K	Hydroxymethylglutaryl-CoA lyase, mitochondrial OS=Homo sapiens OX=9606 GN=HMGCL PE=1 SV=2	HMGCL	1	1.48048e-28	176.83	K(1)NINCSIEESFQR	3	0.46393	3	1.382	1.441	1.469	0.652	0.7	0.787
hsa00650 Butanoate metabolism	0.104349	5	1.84	P35914	48	0.514	Down	1.7386e-06	K	Hydroxymethylglutaryl-CoA lyase, mitochondrial OS=Homo sapiens OX=9606 GN=HMGCL PE=1 SV=2	HMGCL	1	8.45526e-28	168.69	DGLQNEK(1)NIVSTPVK	2	-0.42963	3	1.44	1.397	1.407	0.751	0.717	0.715
hsa00650 Butanoate metabolism	0.104349	5	1.84	P54868	447	0.607	Down	5.5129e-07	K	Hydroxymethylglutaryl-CoA synthase, mitochondrial OS=Homo sapiens OX=9606 GN=HMGCS2 PE=1 SV=1	HMGCS2	1	0.000987534	89.356	LVSSTSDLPK(1)R	2	-1.376	1	1.336	1.296	1.305	0.802	0.789	0.797
hsa00650 Butanoate metabolism	0.104349	5	1.84	P54868	354	0.578	Down	0.00040217	K	Hydroxymethylglutaryl-CoA synthase, mitochondrial OS=Homo sapiens OX=9606 GN=HMGCS2 PE=1 SV=1	HMGCS2	1	0.0029114	109.66	DLDK(1)ALLK	2	0.83311	1	1.423	1.339	1.266	0.801	0.72	0.809
hsa00650 Butanoate metabolism	0.104349	5	1.84	P54868	83	0.6	Down	3.4778e-06	K	Hydroxymethylglutaryl-CoA synthase, mitochondrial OS=Homo sapiens OX=9606 GN=HMGCS2 PE=1 SV=1	HMGCS2	1	5.39364e-09	116.6	YNNVEAGK(1)YTVGLGQTR	2	0.99562	2	1.335	1.313	1.31	0.804	0.804	0.767
hsa00650 Butanoate metabolism	0.104349	5	1.84	P54868	310	0.49	Down	0.000137702	K	Hydroxymethylglutaryl-CoA synthase, mitochondrial OS=Homo sapiens OX=9606 GN=HMGCS2 PE=1 SV=1	HMGCS2	1	0.0108676	85.744	MVQK(1)SLAR	2	-1.7814	1	1.406	1.493	1.427	0.645	0.72	0.754
hsa00650 Butanoate metabolism	0.104349	5	1.84	P24752	174	0.297	Down	3.2579e-06	K	Acetyl-CoA acetyltransferase, mitochondrial OS=Homo sapiens OX=9606 GN=ACAT1 PE=1 SV=1	ACAT1	1	0.000149298	75.018	GSTPYGGVK(1)LEDLIVK	3	0.042257	1	1.807	1.635	1.755	0.54	0.495	0.509
hsa00650 Butanoate metabolism	0.104349	5	1.84	P40939	60	0.394	Down	2.1245e-05	K	Trifunctional enzyme subunit alpha, mitochondrial OS=Homo sapiens OX=9606 GN=HADHA PE=1 SV=2	HADHA	1	0.000326831	92.38	INSPNSK(1)VNTLSK	2	1.332	1	1.576	1.647	1.499	0.632	0.583	0.645
hsa00650 Butanoate metabolism	0.104349	5	1.84	P40939	353	0.198	Down	4.0698e-07	K	Trifunctional enzyme subunit alpha, mitochondrial OS=Homo sapiens OX=9606 GN=HADHA PE=1 SV=2	HADHA	1	0.00293526	99.442	NK(1)FGAPQK	3	-0.27395	2	2.008	1.903	1.879	0.398	0.379	0.367
hsa00650 Butanoate metabolism	0.104349	5	1.84	P40939	644	0.486	Down	1.51598e-05	K	Trifunctional enzyme subunit alpha, mitochondrial OS=Homo sapiens OX=9606 GN=HADHA PE=1 SV=2	HADHA	1	4.34993e-05	101.89	GFYIYQEGVK(1)R	2	-1.1374	3	1.474	1.433	1.437	0.671	0.714	0.728
hsa00650 Butanoate metabolism	0.104349	5	1.84	P40939	411	0.18	Down	1.2788e-06	K	Trifunctional enzyme subunit alpha, mitochondrial OS=Homo sapiens OX=9606 GN=HADHA PE=1 SV=2	HADHA	1	0.0197409	87.476	GLNDK(1)VK	2	-0.16327	1	2.009	2.02	1.874	0.359	0.375	0.331
hsa00650 Butanoate metabolism	0.104349	5	1.84	P40939	386	0.624	Down	8.2494e-05	K	Trifunctional enzyme subunit alpha, mitochondrial OS=Homo sapiens OX=9606 GN=HADHA PE=1 SV=2	HADHA	1	0.0280241	80.438	GLK(1)TILK	2	-0.86368	1	1.339	1.26	1.288	0.844	0.803	0.78
hsa00650 Butanoate metabolism	0.104349	5	1.84	P40939	569	0.58	Down	0.000183724	K	Trifunctional enzyme subunit alpha, mitochondrial OS=Homo sapiens OX=9606 GN=HADHA PE=1 SV=2	HADHA	1	0.000824408	82.417	ILQEGVDPK(1)K	2	0.419	2	1.423	1.253	1.347	0.751	0.799	0.782
hsa00650 Butanoate metabolism	0.104349	5	1.84	P40939	735	0.514	Down	2.203e-05	K	Trifunctional enzyme subunit alpha, mitochondrial OS=Homo sapiens OX=9606 GN=HADHA PE=1 SV=2	HADHA	1	0.0095576	88.495	K(1)YEAAYGK	2	0.6585	2	1.358	1.433	1.45	0.712	0.759	0.709
hsa04966 Collecting duct acid secretion	0.126611	3	2.21	P21281	109	0.48	Down	5.5611e-07	K	V-type proton ATPase subunit B, brain isoform OS=Homo sapiens OX=9606 GN=ATP6V1B2 PE=1 SV=3	ATP6V1B2	1	0.000924525	87.718	K(1)TSCEFTGDILR	3	-0.37516	3	1.482	1.45	1.439	0.716	0.687	0.694
hsa04966 Collecting duct acid secretion	0.126611	3	2.21	P21281	108	0.532	Down	0.0050152	K	V-type proton ATPase subunit B, brain isoform OS=Homo sapiens OX=9606 GN=ATP6V1B2 PE=1 SV=3	ATP6V1B2	1	1.83584e-08	108.14	AVVQVFEGTSGIDAK(1)K	3	0.31694	1	1.399	1.378	1.407	0.809	0.702	0.715
hsa04966 Collecting duct acid secretion	0.126611	3	2.21	P38606	132	0.405	Down	1.77762e-05	K	V-type proton ATPase catalytic subunit A OS=Homo sapiens OX=9606 GN=ATP6V1A PE=1 SV=2	ATP6V1A	1	0.000353207	107.09	DIK(1)WDFTPCK	2	-0.13164	2	1.639	1.537	1.502	0.652	0.641	0.6
hsa04966 Collecting duct acid secretion	0.126611	3	2.21	P36543	138	0.569	Down	2.1349e-05	K	V-type proton ATPase subunit E 1 OS=Homo sapiens OX=9606 GN=ATP6V1E1 PE=1 SV=1	ATP6V1E1	1	0.01156	85.355	K(1)QDFPLVK	3	0.41354	2	1.333	1.367	1.353	0.748	0.806	0.753
hsa05222 Small cell lung cancer	0.801541	2	0.74	Q04206	122	0.545	Down	0.0071434	K	Transcription factor p65 OS=Homo sapiens OX=9606 GN=RELA PE=1 SV=2	RELA	1	3.64055e-22	149.32	CIHSFQNLGIQCVK(1)K	3	0.47742	1	1.382	1.379	1.378	0.794	0.785	0.676
hsa05222 Small cell lung cancer	0.801541	2	0.74	Q04206	195	0.657	Down	4.2829e-05	K	Transcription factor p65 OS=Homo sapiens OX=9606 GN=RELA PE=1 SV=2	RELA	1	0.00217284	81.48	APNTAELK(1)ICR	2	-0.29332	1	1.29	1.233	1.264	0.806	0.824	0.857
hsa05222 Small cell lung cancer	0.801541	2	0.74	P06400	65	0.464	Down	0.002224	K	Retinoblastoma-associated protein OS=Homo sapiens OX=9606 GN=RB1 PE=1 SV=2	RB1	1	0.00150538	94.114	LK(1)IPDHVR	3	-0.34904	1	1.381	1.521	1.526	0.796	0.554	0.706
hsa03013 RNA transport	0.316401	22	1.11	Q9HAV4	41	0.321	Down	2.8685e-06	K	Exportin-5 OS=Homo sapiens OX=9606 GN=XPO5 PE=1 SV=1	XPO5	1	0.00432488	85.355	FCEEFK(1)EK	3	-0.12728	2	1.76	1.666	1.642	0.532	0.523	0.574
hsa03013 RNA transport	0.316401	22	1.11	P37198	504	0.54	Down	0.00021721	K	Nuclear pore glycoprotein p62 OS=Homo sapiens OX=9606 GN=NUP62 PE=1 SV=3	NUP62	0.999971	0.00303551	61.167	KVEEVTK(1)VCEGR	3	0.24462	1	1.4	1.423	1.33	0.705	0.813	0.724
hsa03013 RNA transport	0.316401	22	1.11	O14980	103	0.351	Down	2.2658e-06	K	Exportin-1 OS=Homo sapiens OX=9606 GN=XPO1 PE=1 SV=1	XPO1	1	0.00322946	107.79	NQCEGIK(1)K	3	-2.6199	2	1.685	1.659	1.58	0.601	0.573	0.553
hsa03013 RNA transport	0.316401	22	1.11	O14980	122	0.347	Down	8.8605e-07	K	Exportin-1 OS=Homo sapiens OX=9606 GN=XPO1 PE=1 SV=1	XPO1	1	2.0108e-07	125.53	TSSDPTCVEK(1)EK	3	-1.7379	2	1.706	1.593	1.643	0.587	0.569	0.558
hsa03013 RNA transport	0.316401	22	1.11	Q5VTE0	376	0.352	Down	3.2826e-07	K	Putative elongation factor 1-alpha-like 3 OS=Homo sapiens OX=9606 GN=EEF1A1P5 PE=5 SV=1	EEF1A1P5	1	0.0336053	78.113	FAELK(1)EK	2	-0.6028	1	1.692	1.634	1.59	0.574	0.573	0.584
hsa03013 RNA transport	0.316401	22	1.11	O75822	210	0.643	Down	2.021e-05	K	Eukaryotic translation initiation factor 3 subunit J OS=Homo sapiens OX=9606 GN=EIF3J PE=1 SV=2	EIF3J	1	2.84874e-11	125.97	ITNSLTVLCSEK(1)QK	3	-0.53427	1	1.253	1.289	1.283	0.796	0.844	0.819
hsa03013 RNA transport	0.316401	22	1.11	P47813	56	0.392	Down	0.00122466	K	Eukaryotic translation initiation factor 1A, X-chromosomal OS=Homo sapiens OX=9606 GN=EIF1AX PE=1 SV=2	EIF1AX	1	0.00060676	84.507	LEAMCFDGVK(1)R	2	-0.88273	2	1.781	1.38	1.574	0.548	0.731	0.579
hsa03013 RNA transport	0.316401	22	1.11	Q7L576	516	0.465	Down	0.00060253	K	Cytoplasmic FMR1-interacting protein 1 OS=Homo sapiens OX=9606 GN=CYFIP1 PE=1 SV=1	CYFIP1	1	2.47216e-06	84.107	K(1)TVCDWETGHEPFNDPALR	3	0.46049	1	1.526	1.529	1.372	0.613	0.778	0.666
hsa03013 RNA transport	0.316401	22	1.11	P49792	1332	0.254	Down	2.3978e-05	K	E3 SUMO-protein ligase RanBP2 OS=Homo sapiens OX=9606 GN=RANBP2 PE=1 SV=2	RANBP2	1	0.00029099	85.554	EPTSHDNK(1)DICK	3	-1.5358	1	1.751	1.825	1.852	0.407	0.466	0.503
hsa03013 RNA transport	0.316401	22	1.11	P49792	2581	0.143	Down	3.2447e-07	K	E3 SUMO-protein ligase RanBP2 OS=Homo sapiens OX=9606 GN=RANBP2 PE=1 SV=2	RANBP2	0.995422	1.20345e-09	117.65	K(0.005)CELSK(0.995)NSDIEQSSDSK	3	-0.64278	1	2.129	2.071	1.971	0.279	0.301	0.304
hsa03013 RNA transport	0.316401	22	1.11	P49792	2138	0.256	Down	2.3285e-06	K	E3 SUMO-protein ligase RanBP2 OS=Homo sapiens OX=9606 GN=RANBP2 PE=1 SV=2	RANBP2	1	0.00316207	107.21	QK(1)FEECQR	2	0.11464	1	1.752	1.82	1.844	0.454	0.437	0.496
hsa03013 RNA transport	0.316401	22	1.11	P49792	3034	0.452	Down	3.5313e-05	K	E3 SUMO-protein ligase RanBP2 OS=Homo sapiens OX=9606 GN=RANBP2 PE=1 SV=2	RANBP2	1	0.00441888	101.65	EVADCFK(1)K	2	-0.79272	1	1.454	1.469	1.548	0.634	0.709	0.679
hsa03013 RNA transport	0.316401	22	1.11	Q8IYB3	36	0.566	Down	5.9421e-05	K	Serine/arginine repetitive matrix protein 1 OS=Homo sapiens OX=9606 GN=SRRM1 PE=1 SV=2	SRRM1	1	0.0047947	99.815	FAECLEK(1)K	2	-0.89521	1	1.345	1.384	1.334	0.721	0.791	0.787
hsa03013 RNA transport	0.316401	22	1.11	Q9Y3F4	148	0.441	Down	3.7532e-05	K	Serine-threonine kinase receptor-associated protein OS=Homo sapiens OX=9606 GN=STRAP PE=1 SV=1	STRAP	1	0.00146412	96.229	K(1)ALWCSEDK	2	-0.98203	1	1.605	1.444	1.478	0.651	0.646	0.698
hsa03013 RNA transport	0.316401	22	1.11	Q8NI27	1156	0.16	Down	0.000102576	K	THO complex subunit 2 OS=Homo sapiens OX=9606 GN=THOC2 PE=1 SV=2	THOC2	1	0.0045753	99.973	ICQEEK(1)EK	3	-1.0392	2	2.091	1.986	1.971	0.322	0.323	0.325
hsa03013 RNA transport	0.316401	22	1.11	Q9NR50	382	0.66	Down	0.00027572	K	Translation initiation factor eIF-2B subunit gamma OS=Homo sapiens OX=9606 GN=EIF2B3 PE=1 SV=1	EIF2B3	1	0.0032079	72.681	SVIGSSCLIK(1)DR	2	-0.49047	1	1.309	1.21	1.262	0.812	0.875	0.807
hsa03013 RNA transport	0.316401	22	1.11	Q92900	378	0.213	Down	3.1039e-06	K	Regulator of nonsense transcripts 1 OS=Homo sapiens OX=9606 GN=UPF1 PE=1 SV=2	UPF1	1	0.000607611	91.961	YK(1)GDLAPLWK	2	-0.82536	3	1.986	1.884	1.816	0.381	0.438	0.394
hsa03013 RNA transport	0.316401	22	1.11	P62826	123	0.484	Down	1.2707e-06	K	GTP-binding nuclear protein Ran OS=Homo sapiens OX=9606 GN=RAN PE=1 SV=3	RAN	1	1.12796e-19	139.29	VCENIPIVLCGNK(1)VDIK	3	-0.81793	3	1.435	1.493	1.423	0.688	0.703	0.715
hsa03013 RNA transport	0.316401	22	1.11	Q13347	141	0.239	Down	5.5522e-05	K	Eukaryotic translation initiation factor 3 subunit I OS=Homo sapiens OX=9606 GN=EIF3I PE=1 SV=1	EIF3I	1	1.15565e-06	80.382	DPSQIDNNEPYMK(1)IPCNDSK	3	-0.76402	1	1.732	1.919	1.87	0.497	0.388	0.432
hsa03013 RNA transport	0.316401	22	1.11	P41567	42	0.632	Down	0.000162099	K	Eukaryotic translation initiation factor 1 OS=Homo sapiens OX=9606 GN=EIF1 PE=1 SV=1	EIF1	1	7.53345e-06	99.055	K(1)TLTTVQGIADDYDK	3	0.07409	1	1.261	1.32	1.279	0.82	0.852	0.767
hsa03013 RNA transport	0.316401	22	1.11	P41567	66	0.249	Down	0.000176697	K	Eukaryotic translation initiation factor 1 OS=Homo sapiens OX=9606 GN=EIF1 PE=1 SV=1	EIF1	1	1.09098e-35	151	K(1)FACNGTVIEHPEYGEVIQLQGDQR	3	-0.068649	1	1.685	1.755	2.011	0.448	0.386	0.524
hsa03013 RNA transport	0.316401	22	1.11	Q13838	162	0.422	Down	1.92273e-05	K	Spliceosome RNA helicase DDX39B OS=Homo sapiens OX=9606 GN=DDX39B PE=1 SV=1	DDX39B	1	0.0197688	89.827	KDEEVLK(1)K	2	-0.64126	3	1.559	1.602	1.441	0.667	0.628	0.647
hsa03013 RNA transport	0.316401	22	1.11	Q13838	241	0.44	Down	8.2451e-07	K	Spliceosome RNA helicase DDX39B OS=Homo sapiens OX=9606 GN=DDX39B PE=1 SV=1	DDX39B	1	2.52188e-06	104.2	K(1)FMQDPMEIFVDDETK	3	0.192	1	1.517	1.49	1.519	0.687	0.659	0.647
hsa03013 RNA transport	0.316401	22	1.11	O15372	180	0.383	Down	1.1966e-07	K	Eukaryotic translation initiation factor 3 subunit H OS=Homo sapiens OX=9606 GN=EIF3H PE=1 SV=1	EIF3H	1	0.000139172	116.24	EK(1)DFSPEALK	3	1.7709	2	1.582	1.612	1.575	0.598	0.606	0.622
hsa03013 RNA transport	0.316401	22	1.11	Q8TEQ6	860	0.481	Down	0.00165687	K	Gem-associated protein 5 OS=Homo sapiens OX=9606 GN=GEMIN5 PE=1 SV=3	GEMIN5	1	1.41616e-06	104.88	SK(1)EELHQDCLVLATAK	3	-0.75026	1	1.465	1.457	1.445	0.692	0.739	0.668
hsa03013 RNA transport	0.316401	22	1.11	Q8TEQ6	1390	0.329	Down	3.6375e-06	K	Gem-associated protein 5 OS=Homo sapiens OX=9606 GN=GEMIN5 PE=1 SV=3	GEMIN5	1	0.000373398	101.65	QHQK(1)SQLCK	3	-1.7575	1	1.637	1.637	1.75	0.557	0.576	0.521
hsa03013 RNA transport	0.316401	22	1.11	P55735	192	0.494	Down	1.69329e-05	K	Protein SEC13 homolog OS=Homo sapiens OX=9606 GN=SEC13 PE=1 SV=3	SEC13	1	0.000354026	70.889	FASGGCDNLIK(1)LWK	3	-1.05	1	1.463	1.414	1.438	0.682	0.745	0.705
hsa03013 RNA transport	0.316401	22	1.11	Q04637	597	0.625	Down	1.99981e-05	K	Eukaryotic translation initiation factor 4 gamma 1 OS=Homo sapiens OX=9606 GN=EIF4G1 PE=1 SV=4	EIF4G1	0.81746	0.0204828	41.482	YEYK(0.817)SDQWK(0.183)PLNLEEK	3	3.6628	1	1.302	1.278	1.303	0.838	0.803	0.785
hsa03013 RNA transport	0.316401	22	1.11	P63279	49	0.356	Down	3.7389e-05	K	SUMO-conjugating enzyme UBC9 OS=Homo sapiens OX=9606 GN=UBE2I PE=1 SV=1	UBE2I	1	0.00141737	86.699	K(1)GTPWEGGLFK	3	0.37048	2	1.601	1.604	1.683	0.538	0.568	0.634
hsa04145 Phagosome	0.385292	7	1.17	Q14204	4441	0.577	Down	0.000176915	K	Cytoplasmic dynein 1 heavy chain 1 OS=Homo sapiens OX=9606 GN=DYNC1H1 PE=1 SV=5	DYNC1H1	1	0.000216834	86.497	QDLADVVQVCEGK(1)K	3	0.12214	1	1.382	1.322	1.325	0.728	0.765	0.83
hsa04145 Phagosome	0.385292	7	1.17	Q14204	1496	0.648	Down	5.8581e-05	K	Cytoplasmic dynein 1 heavy chain 1 OS=Homo sapiens OX=9606 GN=DYNC1H1 PE=1 SV=5	DYNC1H1	1	0.000315582	108.7	GWDDLFNK(1)VK	2	0.24714	2	1.318	1.266	1.231	0.842	0.803	0.828
hsa04145 Phagosome	0.385292	7	1.17	P27824	382	0.657	Down	0.000121315	K	Calnexin OS=Homo sapiens OX=9606 GN=CANX PE=1 SV=2	CANX	0.996394	1.29514e-09	113.88	GK(0.996)WK(0.004)PPMIDNPSYQGIWK	3	-1.0396	2	1.215	1.261	1.309	0.858	0.805	0.825
hsa04145 Phagosome	0.385292	7	1.17	P21281	109	0.48	Down	5.5611e-07	K	V-type proton ATPase subunit B, brain isoform OS=Homo sapiens OX=9606 GN=ATP6V1B2 PE=1 SV=3	ATP6V1B2	1	0.000924525	87.718	K(1)TSCEFTGDILR	3	-0.37516	3	1.482	1.45	1.439	0.716	0.687	0.694
hsa04145 Phagosome	0.385292	7	1.17	P21281	108	0.532	Down	0.0050152	K	V-type proton ATPase subunit B, brain isoform OS=Homo sapiens OX=9606 GN=ATP6V1B2 PE=1 SV=3	ATP6V1B2	1	1.83584e-08	108.14	AVVQVFEGTSGIDAK(1)K	3	0.31694	1	1.399	1.378	1.407	0.809	0.702	0.715
hsa04145 Phagosome	0.385292	7	1.17	P60468	35	0.189	Down	1.75036e-05	K	Protein transport protein Sec61 subunit beta OS=Homo sapiens OX=9606 GN=SEC61B PE=1 SV=2	SEC61B	1	0.00214134	118.04	K(1)NASCGTR	2	-0.85995	1	1.927	2.044	1.877	0.404	0.373	0.327
hsa04145 Phagosome	0.385292	7	1.17	P38606	132	0.405	Down	1.77762e-05	K	V-type proton ATPase catalytic subunit A OS=Homo sapiens OX=9606 GN=ATP6V1A PE=1 SV=2	ATP6V1A	1	0.000353207	107.09	DIK(1)WDFTPCK	2	-0.13164	2	1.639	1.537	1.502	0.652	0.641	0.6
hsa04145 Phagosome	0.385292	7	1.17	P63261	291	0.532	Down	4.2125e-05	K	Actin, cytoplasmic 2 OS=Homo sapiens OX=9606 GN=ACTG1 PE=1 SV=1	ACTG1	1	1.10521e-10	103.84	K(1)DLYANTVLSGGTTMYPGIADR	2	0.54304	5	1.347	1.356	1.477	0.746	0.756	0.72
hsa04145 Phagosome	0.385292	7	1.17	P36543	138	0.569	Down	2.1349e-05	K	V-type proton ATPase subunit E 1 OS=Homo sapiens OX=9606 GN=ATP6V1E1 PE=1 SV=1	ATP6V1E1	1	0.01156	85.355	K(1)QDFPLVK	3	0.41354	2	1.333	1.367	1.353	0.748	0.806	0.753
hsa00240 Pyrimidine metabolism	0.729056	3	0.85	P23921	414	0.201	Down	1.3358e-06	K	Ribonucleoside-diphosphate reductase large subunit OS=Homo sapiens OX=9606 GN=RRM1 PE=1 SV=1	RRM1	1	3.90941e-15	159.66	K(1)SNQQNLGTIK	2	0.94274	1	1.843	2.011	1.903	0.412	0.374	0.373
hsa00240 Pyrimidine metabolism	0.729056	3	0.85	Q8TCD5	112	0.502	Down	0.00010081	K	5'(3')-deoxyribonucleotidase, cytosolic type OS=Homo sapiens OX=9606 GN=NT5C PE=1 SV=2	NT5C	1	0.000397329	86.882	YHHCVGEK(1)YR	3	-1.1466	4	1.441	1.4	1.446	0.68	0.78	0.69
hsa00240 Pyrimidine metabolism	0.729056	3	0.85	P17812	489	0.631	Down	0.002279	K	CTP synthase 1 OS=Homo sapiens OX=9606 GN=CTPS1 PE=1 SV=2	CTPS1	1	0.0419533	43.77	FEVNPVWK(1)K	3	-1.2884	1	1.343	1.211	1.31	0.859	0.72	0.86
hsa04920 Adipocytokine signaling pathway	0.606856	2	1.05	Q04206	122	0.545	Down	0.0071434	K	Transcription factor p65 OS=Homo sapiens OX=9606 GN=RELA PE=1 SV=2	RELA	1	3.64055e-22	149.32	CIHSFQNLGIQCVK(1)K	3	0.47742	1	1.382	1.379	1.378	0.794	0.785	0.676
hsa04920 Adipocytokine signaling pathway	0.606856	2	1.05	Q04206	195	0.657	Down	4.2829e-05	K	Transcription factor p65 OS=Homo sapiens OX=9606 GN=RELA PE=1 SV=2	RELA	1	0.00217284	81.48	APNTAELK(1)ICR	2	-0.29332	1	1.29	1.233	1.264	0.806	0.824	0.857
hsa04920 Adipocytokine signaling pathway	0.606856	2	1.05	Q06124	178	0.256	Down	1.83063e-05	K	Tyrosine-protein phosphatase non-receptor type 11 OS=Homo sapiens OX=9606 GN=PTPN11 PE=1 SV=2	PTPN11	1	0.00118893	79.346	CQELK(1)YDVGGGER	2	0.10773	2	1.739	1.852	1.824	0.421	0.505	0.46
hsa04611 Platelet activation	0.301815	6	1.3	P62136	41	0.561	Down	0.000119643	K	Serine/threonine-protein phosphatase PP1-alpha catalytic subunit OS=Homo sapiens OX=9606 GN=PPP1CA PE=1 SV=1	PPP1CA	1	0.0182236	88.954	GLCLK(1)SR	2	0.99693	1	1.421	1.279	1.382	0.769	0.732	0.791
hsa04611 Platelet activation	0.301815	6	1.3	P63092	8	0.162	Down	1.3942e-07	K	Guanine nucleotide-binding protein G(s) subunit alpha isoforms short OS=Homo sapiens OX=9606 GN=GNAS PE=1 SV=1	GNAS	1	0.00017262	97.463	GCLGNSK(1)TEDQR	2	-0.98053	1	2.08	2.045	1.911	0.324	0.323	0.33
hsa04611 Platelet activation	0.301815	6	1.3	P63261	291	0.532	Down	4.2125e-05	K	Actin, cytoplasmic 2 OS=Homo sapiens OX=9606 GN=ACTG1 PE=1 SV=1	ACTG1	1	1.10521e-10	103.84	K(1)DLYANTVLSGGTTMYPGIADR	2	0.54304	5	1.347	1.356	1.477	0.746	0.756	0.72
hsa04611 Platelet activation	0.301815	6	1.3	Q9Y490	2445	0.279	Down	2.4271e-06	K	Talin-1 OS=Homo sapiens OX=9606 GN=TLN1 PE=1 SV=3	TLN1	1	2.8004e-05	114.7	VK(1)ADQDSEAMK	2	-0.094946	1	1.709	1.766	1.815	0.526	0.472	0.478
hsa04611 Platelet activation	0.301815	6	1.3	Q14573	258	0.471	Down	3.6728e-06	K	Inositol 1,4,5-trisphosphate receptor type 3 OS=Homo sapiens OX=9606 GN=ITPR3 PE=1 SV=2	ITPR3	1	0.000333363	105.13	FLTCDEYK(1)GK	2	-1.2035	2	1.529	1.425	1.454	0.707	0.674	0.693
hsa04611 Platelet activation	0.301815	6	1.3	P61586	104	0.588	Down	4.1025e-05	K	Transforming protein RhoA OS=Homo sapiens OX=9606 GN=RHOA PE=1 SV=1	RHOA	1	5.97999e-08	100.02	WTPEVK(1)HFCPNVPIILVGNK	4	0.21964	2	1.315	1.323	1.356	0.779	0.749	0.819
hsa04972 Pancreatic secretion	0.345991	4	1.34	P63092	8	0.162	Down	1.3942e-07	K	Guanine nucleotide-binding protein G(s) subunit alpha isoforms short OS=Homo sapiens OX=9606 GN=GNAS PE=1 SV=1	GNAS	1	0.00017262	97.463	GCLGNSK(1)TEDQR	2	-0.98053	1	2.08	2.045	1.911	0.324	0.323	0.33
hsa04972 Pancreatic secretion	0.345991	4	1.34	P17252	575	0.62	Down	0.0034987	K	Protein kinase C alpha type OS=Homo sapiens OX=9606 GN=PRKCA PE=1 SV=4	PRKCA	1	0.00296928	74.92	GLMTK(1)HPAK	3	-0.94664	1	1.458	1.172	1.271	0.802	0.869	0.748
hsa04972 Pancreatic secretion	0.345991	4	1.34	Q14573	258	0.471	Down	3.6728e-06	K	Inositol 1,4,5-trisphosphate receptor type 3 OS=Homo sapiens OX=9606 GN=ITPR3 PE=1 SV=2	ITPR3	1	0.000333363	105.13	FLTCDEYK(1)GK	2	-1.2035	2	1.529	1.425	1.454	0.707	0.674	0.693
hsa04972 Pancreatic secretion	0.345991	4	1.34	P61586	104	0.588	Down	4.1025e-05	K	Transforming protein RhoA OS=Homo sapiens OX=9606 GN=RHOA PE=1 SV=1	RHOA	1	5.97999e-08	100.02	WTPEVK(1)HFCPNVPIILVGNK	4	0.21964	2	1.315	1.323	1.356	0.779	0.749	0.819
hsa03022 Basal transcription factors	0.718359	1	0.92	P78347	477	0.536	Down	3.8566e-05	K	General transcription factor II-I OS=Homo sapiens OX=9606 GN=GTF2I PE=1 SV=2	GTF2I	1	2.72103e-07	123.29	K(1)FAEALGSTEAK	2	0.81987	2	1.375	1.412	1.381	0.79	0.726	0.718
hsa05161 Hepatitis B	0.669484	6	0.92	Q09472	1590	0.62	Down	0.00020271	K	Histone acetyltransferase p300 OS=Homo sapiens OX=9606 GN=EP300 PE=1 SV=2	EP300	1	0.00029002	91.867	LYATMEK(1)HK	3	-0.76884	4	1.377	1.286	1.238	0.838	0.789	0.79
hsa05161 Hepatitis B	0.669484	6	0.92	Q04206	122	0.545	Down	0.0071434	K	Transcription factor p65 OS=Homo sapiens OX=9606 GN=RELA PE=1 SV=2	RELA	1	3.64055e-22	149.32	CIHSFQNLGIQCVK(1)K	3	0.47742	1	1.382	1.379	1.378	0.794	0.785	0.676
hsa05161 Hepatitis B	0.669484	6	0.92	Q04206	195	0.657	Down	4.2829e-05	K	Transcription factor p65 OS=Homo sapiens OX=9606 GN=RELA PE=1 SV=2	RELA	1	0.00217284	81.48	APNTAELK(1)ICR	2	-0.29332	1	1.29	1.233	1.264	0.806	0.824	0.857
hsa05161 Hepatitis B	0.669484	6	0.92	P17252	575	0.62	Down	0.0034987	K	Protein kinase C alpha type OS=Homo sapiens OX=9606 GN=PRKCA PE=1 SV=4	PRKCA	1	0.00296928	74.92	GLMTK(1)HPAK	3	-0.94664	1	1.458	1.172	1.271	0.802	0.869	0.748
hsa05161 Hepatitis B	0.669484	6	0.92	P42224	152	0.61	Down	0.00037983	K	Signal transducer and activator of transcription 1-alpha/beta OS=Homo sapiens OX=9606 GN=STAT1 PE=1 SV=2	STAT1	1	0.00351683	63.091	DK(1)VMCIEHEIK	3	-0.25958	1	1.219	1.385	1.319	0.803	0.829	0.762
hsa05161 Hepatitis B	0.669484	6	0.92	P06400	65	0.464	Down	0.002224	K	Retinoblastoma-associated protein OS=Homo sapiens OX=9606 GN=RB1 PE=1 SV=2	RB1	1	0.00150538	94.114	LK(1)IPDHVR	3	-0.34904	1	1.381	1.521	1.526	0.796	0.554	0.706
hsa05161 Hepatitis B	0.669484	6	0.92	Q9Y277	61	0.61	Down	6.2345e-05	K	Voltage-dependent anion-selective channel protein 3 OS=Homo sapiens OX=9606 GN=VDAC3 PE=1 SV=1	VDAC3	1	2.31395e-05	127.17	ASGNLETK(1)YK	3	-1.1902	4	1.36	1.318	1.248	0.78	0.817	0.798
hsa00410 beta-Alanine metabolism	0.261174	5	1.42	Q6NVY1	42	0.416	Down	1.2496e-06	K	3-hydroxyisobutyryl-CoA hydrolase, mitochondrial OS=Homo sapiens OX=9606 GN=HIBCH PE=1 SV=2	HIBCH	1	3.31192e-05	101.53	HTDAAEEVLLEK(1)K	3	-0.054608	1	1.5	1.553	1.57	0.618	0.652	0.651
hsa00410 beta-Alanine metabolism	0.261174	5	1.42	Q02252	52	0.553	Down	0.00015581	K	Methylmalonate-semialdehyde dehydrogenase [acylating], mitochondrial OS=Homo sapiens OX=9606 GN=ALDH6A1 PE=1 SV=2	ALDH6A1	1	0.0431707	65.278	FVESK(1)SDK	2	2.3889	1	1.311	1.436	1.36	0.807	0.723	0.743
hsa00410 beta-Alanine metabolism	0.261174	5	1.42	Q02252	364	0.604	Down	0.0058015	K	Methylmalonate-semialdehyde dehydrogenase [acylating], mitochondrial OS=Homo sapiens OX=9606 GN=ALDH6A1 PE=1 SV=2	ALDH6A1	1	0.00012552	55.051	VNAGDQPGADLGPLITPQAK(1)ER	3	-1.9224	1	1.419	1.317	1.219	0.896	0.819	0.674
hsa00410 beta-Alanine metabolism	0.261174	5	1.42	Q02252	331	0.425	Down	0.00072338	K	Methylmalonate-semialdehyde dehydrogenase [acylating], mitochondrial OS=Homo sapiens OX=9606 GN=ALDH6A1 PE=1 SV=2	ALDH6A1	1	0.000862761	80.69	K(1)WLPELVEHAK	3	-0.56312	1	1.597	1.582	1.405	0.569	0.625	0.753
hsa00410 beta-Alanine metabolism	0.261174	5	1.42	P05091	52	0.475	Down	7.6005e-05	K	Aldehyde dehydrogenase, mitochondrial OS=Homo sapiens OX=9606 GN=ALDH2 PE=1 SV=2	ALDH2	1	1.86737e-16	95.646	K(1)TFPTVNPSTGEVICQVAEGDKEDVDK	4	-0.54916	1	1.456	1.43	1.497	0.65	0.681	0.75
hsa00410 beta-Alanine metabolism	0.261174	5	1.42	P40939	60	0.394	Down	2.1245e-05	K	Trifunctional enzyme subunit alpha, mitochondrial OS=Homo sapiens OX=9606 GN=HADHA PE=1 SV=2	HADHA	1	0.000326831	92.38	INSPNSK(1)VNTLSK	2	1.332	1	1.576	1.647	1.499	0.632	0.583	0.645
hsa00410 beta-Alanine metabolism	0.261174	5	1.42	P40939	353	0.198	Down	4.0698e-07	K	Trifunctional enzyme subunit alpha, mitochondrial OS=Homo sapiens OX=9606 GN=HADHA PE=1 SV=2	HADHA	1	0.00293526	99.442	NK(1)FGAPQK	3	-0.27395	2	2.008	1.903	1.879	0.398	0.379	0.367
hsa00410 beta-Alanine metabolism	0.261174	5	1.42	P40939	644	0.486	Down	1.51598e-05	K	Trifunctional enzyme subunit alpha, mitochondrial OS=Homo sapiens OX=9606 GN=HADHA PE=1 SV=2	HADHA	1	4.34993e-05	101.89	GFYIYQEGVK(1)R	2	-1.1374	3	1.474	1.433	1.437	0.671	0.714	0.728
hsa00410 beta-Alanine metabolism	0.261174	5	1.42	P40939	411	0.18	Down	1.2788e-06	K	Trifunctional enzyme subunit alpha, mitochondrial OS=Homo sapiens OX=9606 GN=HADHA PE=1 SV=2	HADHA	1	0.0197409	87.476	GLNDK(1)VK	2	-0.16327	1	2.009	2.02	1.874	0.359	0.375	0.331
hsa00410 beta-Alanine metabolism	0.261174	5	1.42	P40939	386	0.624	Down	8.2494e-05	K	Trifunctional enzyme subunit alpha, mitochondrial OS=Homo sapiens OX=9606 GN=HADHA PE=1 SV=2	HADHA	1	0.0280241	80.438	GLK(1)TILK	2	-0.86368	1	1.339	1.26	1.288	0.844	0.803	0.78
hsa00410 beta-Alanine metabolism	0.261174	5	1.42	P40939	569	0.58	Down	0.000183724	K	Trifunctional enzyme subunit alpha, mitochondrial OS=Homo sapiens OX=9606 GN=HADHA PE=1 SV=2	HADHA	1	0.000824408	82.417	ILQEGVDPK(1)K	2	0.419	2	1.423	1.253	1.347	0.751	0.799	0.782
hsa00410 beta-Alanine metabolism	0.261174	5	1.42	P40939	735	0.514	Down	2.203e-05	K	Trifunctional enzyme subunit alpha, mitochondrial OS=Homo sapiens OX=9606 GN=HADHA PE=1 SV=2	HADHA	1	0.0095576	88.495	K(1)YEAAYGK	2	0.6585	2	1.358	1.433	1.45	0.712	0.759	0.709
hsa00410 beta-Alanine metabolism	0.261174	5	1.42	P47895	48	0.492	Down	6.4523e-05	K	Aldehyde dehydrogenase family 1 member A3 OS=Homo sapiens OX=9606 GN=ALDH1A3 PE=1 SV=2	ALDH1A3	1	0.00157174	86.911	K(1)FATCNPSTR	2	-0.43183	1	1.53	1.442	1.355	0.742	0.696	0.693
hsa05169 Epstein-Barr virus infection	0.528671	10	1.02	Q99460	146	0.512	Down	4.1955e-05	K	26S proteasome non-ATPase regulatory subunit 1 OS=Homo sapiens OX=9606 GN=PSMD1 PE=1 SV=2	PSMD1	1	0.00226986	89.355	CLDDHK(1)YK	3	-0.61566	1	1.408	1.366	1.477	0.703	0.764	0.708
hsa05169 Epstein-Barr virus infection	0.528671	10	1.02	Q99460	803	0.27	Down	6.2804e-07	K	26S proteasome non-ATPase regulatory subunit 1 OS=Homo sapiens OX=9606 GN=PSMD1 PE=1 SV=2	PSMD1	1	0.00310268	107.79	VQYK(1)SNCK	2	0.97742	1	1.725	1.781	1.835	0.501	0.47	0.469
hsa05169 Epstein-Barr virus infection	0.528671	10	1.02	P06400	65	0.464	Down	0.002224	K	Retinoblastoma-associated protein OS=Homo sapiens OX=9606 GN=RB1 PE=1 SV=2	RB1	1	0.00150538	94.114	LK(1)IPDHVR	3	-0.34904	1	1.381	1.521	1.526	0.796	0.554	0.706
hsa05169 Epstein-Barr virus infection	0.528671	10	1.02	Q15008	349	0.366	Down	1.2631e-07	K	26S proteasome non-ATPase regulatory subunit 6 OS=Homo sapiens OX=9606 GN=PSMD6 PE=1 SV=1	PSMD6	1	2.45272e-05	93.226	IDK(1)VNEIVETNRPDSK	4	0.090022	2	1.596	1.624	1.626	0.576	0.6	0.598
hsa05169 Epstein-Barr virus infection	0.528671	10	1.02	P43686	212	0.662	Down	0.00103772	K	26S proteasome regulatory subunit 6B OS=Homo sapiens OX=9606 GN=PSMC4 PE=1 SV=2	PSMC4	1	4.25551e-05	89.911	GVLMYGPPGCGK(1)TMLAK	3	0.20065	1	1.173	1.303	1.291	0.774	0.864	0.854
hsa05169 Epstein-Barr virus infection	0.528671	10	1.02	Q04206	122	0.545	Down	0.0071434	K	Transcription factor p65 OS=Homo sapiens OX=9606 GN=RELA PE=1 SV=2	RELA	1	3.64055e-22	149.32	CIHSFQNLGIQCVK(1)K	3	0.47742	1	1.382	1.379	1.378	0.794	0.785	0.676
hsa05169 Epstein-Barr virus infection	0.528671	10	1.02	Q04206	195	0.657	Down	4.2829e-05	K	Transcription factor p65 OS=Homo sapiens OX=9606 GN=RELA PE=1 SV=2	RELA	1	0.00217284	81.48	APNTAELK(1)ICR	2	-0.29332	1	1.29	1.233	1.264	0.806	0.824	0.857
hsa05169 Epstein-Barr virus infection	0.528671	10	1.02	P42224	152	0.61	Down	0.00037983	K	Signal transducer and activator of transcription 1-alpha/beta OS=Homo sapiens OX=9606 GN=STAT1 PE=1 SV=2	STAT1	1	0.00351683	63.091	DK(1)VMCIEHEIK	3	-0.25958	1	1.219	1.385	1.319	0.803	0.829	0.762
hsa05169 Epstein-Barr virus infection	0.528671	10	1.02	P30101	94	0.42	Down	4.8366e-06	K	Protein disulfide-isomerase A3 OS=Homo sapiens OX=9606 GN=PDIA3 PE=1 SV=4	PDIA3	1	3.5914e-41	161.47	VDCTANTNTCNK(1)YGVSGYPTLK	4	-0.65929	5	1.559	1.492	1.558	0.681	0.625	0.63
hsa05169 Epstein-Barr virus infection	0.528671	10	1.02	P30101	415	0.45	Down	0.0022784	K	Protein disulfide-isomerase A3 OS=Homo sapiens OX=9606 GN=PDIA3 PE=1 SV=4	PDIA3	1	0.0215894	85.676	NLEPK(1)YK	3	0.15336	4	1.566	1.535	1.386	0.673	0.669	0.679
hsa05169 Epstein-Barr virus infection	0.528671	10	1.02	P30101	82	0.469	Down	4.061e-05	K	Protein disulfide-isomerase A3 OS=Homo sapiens OX=9606 GN=PDIA3 PE=1 SV=4	PDIA3	1	6.15521e-11	117.18	GIVPLAK(1)VDCTANTNTCNK	3	-0.14257	4	1.365	1.513	1.526	0.693	0.669	0.704
hsa05169 Epstein-Barr virus infection	0.528671	10	1.02	O00231	295	0.478	Down	0.000198007	K	26S proteasome non-ATPase regulatory subunit 11 OS=Homo sapiens OX=9606 GN=PSMD11 PE=1 SV=3	PSMD11	1	0.001407	96.342	CVAQASK(1)NR	2	-0.83892	1	1.327	1.442	1.601	0.681	0.715	0.692
hsa05169 Epstein-Barr virus infection	0.528671	10	1.02	Q13547	412	0.47	Down	0.0032599	K	Histone deacetylase 1 OS=Homo sapiens OX=9606 GN=HDAC1 PE=1 SV=1	HDAC1	1	0.00172616	93.096	ISICSSDK(1)R	2	-1.0844	1	1.453	1.472	1.484	0.747	0.681	0.645
hsa05169 Epstein-Barr virus infection	0.528671	10	1.02	P17980	125	0.237	Down	4.4152e-05	K	26S proteasome regulatory subunit 6A OS=Homo sapiens OX=9606 GN=PSMC3 PE=1 SV=3	PSMC3	1	0.00143165	104.05	CAVIK(1)TSTR	2	-2.0264	1	1.899	1.947	1.692	0.467	0.463	0.384
hsa05169 Epstein-Barr virus infection	0.528671	10	1.02	P17980	245	0.411	Down	4.732e-07	K	26S proteasome regulatory subunit 6A OS=Homo sapiens OX=9606 GN=PSMC3 PE=1 SV=3	PSMC3	1	1.931e-13	150.11	ACAAQTK(1)ATFLK	2	0.060852	2	1.561	1.511	1.576	0.622	0.649	0.638
hsa04932 Non-alcoholic fatty liver disease (NAFLD)	0.989046	3	0.41	Q04206	122	0.545	Down	0.0071434	K	Transcription factor p65 OS=Homo sapiens OX=9606 GN=RELA PE=1 SV=2	RELA	1	3.64055e-22	149.32	CIHSFQNLGIQCVK(1)K	3	0.47742	1	1.382	1.379	1.378	0.794	0.785	0.676
hsa04932 Non-alcoholic fatty liver disease (NAFLD)	0.989046	3	0.41	Q04206	195	0.657	Down	4.2829e-05	K	Transcription factor p65 OS=Homo sapiens OX=9606 GN=RELA PE=1 SV=2	RELA	1	0.00217284	81.48	APNTAELK(1)ICR	2	-0.29332	1	1.29	1.233	1.264	0.806	0.824	0.857
hsa04932 Non-alcoholic fatty liver disease (NAFLD)	0.989046	3	0.41	P60953	153	0.577	Down	0.000137319	K	Cell division control protein 42 homolog OS=Homo sapiens OX=9606 GN=CDC42 PE=1 SV=2	CDC42	1	2.59121e-13	142.45	AVK(1)YVECSALTQK	2	-0.94283	2	1.369	1.297	1.364	0.804	0.724	0.799
hsa04932 Non-alcoholic fatty liver disease (NAFLD)	0.989046	3	0.41	P51970	38	0.266	Down	2.3488e-06	K	NADH dehydrogenase [ubiquinone] 1 alpha subcomplex subunit 8 OS=Homo sapiens OX=9606 GN=NDUFA8 PE=1 SV=3	NDUFA8	1	0.00170306	54.09	AAAHHYGAQCDK(1)PNK	3	-0.081265	3	1.827	1.722	1.816	0.446	0.503	0.476
hsa04625 C-type lectin receptor signaling pathway	0.0287451	6	2.21	Q04206	122	0.545	Down	0.0071434	K	Transcription factor p65 OS=Homo sapiens OX=9606 GN=RELA PE=1 SV=2	RELA	1	3.64055e-22	149.32	CIHSFQNLGIQCVK(1)K	3	0.47742	1	1.382	1.379	1.378	0.794	0.785	0.676
hsa04625 C-type lectin receptor signaling pathway	0.0287451	6	2.21	Q04206	195	0.657	Down	4.2829e-05	K	Transcription factor p65 OS=Homo sapiens OX=9606 GN=RELA PE=1 SV=2	RELA	1	0.00217284	81.48	APNTAELK(1)ICR	2	-0.29332	1	1.29	1.233	1.264	0.806	0.824	0.857
hsa04625 C-type lectin receptor signaling pathway	0.0287451	6	2.21	P42224	152	0.61	Down	0.00037983	K	Signal transducer and activator of transcription 1-alpha/beta OS=Homo sapiens OX=9606 GN=STAT1 PE=1 SV=2	STAT1	1	0.00351683	63.091	DK(1)VMCIEHEIK	3	-0.25958	1	1.219	1.385	1.319	0.803	0.829	0.762
hsa04625 C-type lectin receptor signaling pathway	0.0287451	6	2.21	P63098	91	0.609	Down	2.1079e-05	K	Calcineurin subunit B type 1 OS=Homo sapiens OX=9606 GN=PPP3R1 PE=1 SV=2	PPP3R1	0.992001	0.0310274	51.528	GDK(0.008)EQK(0.992)LR	3	1.0201	1	1.276	1.344	1.307	0.772	0.811	0.808
hsa04625 C-type lectin receptor signaling pathway	0.0287451	6	2.21	Q14573	258	0.471	Down	3.6728e-06	K	Inositol 1,4,5-trisphosphate receptor type 3 OS=Homo sapiens OX=9606 GN=ITPR3 PE=1 SV=2	ITPR3	1	0.000333363	105.13	FLTCDEYK(1)GK	2	-1.2035	2	1.529	1.425	1.454	0.707	0.674	0.693
hsa04625 C-type lectin receptor signaling pathway	0.0287451	6	2.21	Q06124	178	0.256	Down	1.83063e-05	K	Tyrosine-protein phosphatase non-receptor type 11 OS=Homo sapiens OX=9606 GN=PTPN11 PE=1 SV=2	PTPN11	1	0.00118893	79.346	CQELK(1)YDVGGGER	2	0.10773	2	1.739	1.852	1.824	0.421	0.505	0.46
hsa04625 C-type lectin receptor signaling pathway	0.0287451	6	2.21	P61586	104	0.588	Down	4.1025e-05	K	Transforming protein RhoA OS=Homo sapiens OX=9606 GN=RHOA PE=1 SV=1	RHOA	1	5.97999e-08	100.02	WTPEVK(1)HFCPNVPIILVGNK	4	0.21964	2	1.315	1.323	1.356	0.779	0.749	0.819
hsa04142 Lysosome	0.523381	6	1.05	Q9UBR2	166	0.449	Down	0.00052197	K	Cathepsin Z OS=Homo sapiens OX=9606 GN=CTSZ PE=1 SV=1	CTSZ	1	0.000205059	60.764	DQECDK(1)FNQCGTCNEFK	3	-1.2451	1	1.478	1.62	1.39	0.638	0.761	0.617
hsa04142 Lysosome	0.523381	6	1.05	P11717	1285	0.431	Down	2.2521e-05	K	Cation-independent mannose-6-phosphate receptor OS=Homo sapiens OX=9606 GN=IGF2R PE=1 SV=3	IGF2R	1	0.0187544	68.657	VVSSCQEK(1)R	2	-1.3987	1	1.571	1.542	1.451	0.618	0.683	0.664
hsa04142 Lysosome	0.523381	6	1.05	P50897	165	0.565	Down	1.84014e-05	K	Palmitoyl-protein thioesterase 1 OS=Homo sapiens OX=9606 GN=PPT1 PE=1 SV=1	PPT1	1	0.00182747	85.536	K(1)TLNAGAYSK	2	-0.12283	1	1.372	1.389	1.309	0.749	0.788	0.762
hsa04142 Lysosome	0.523381	6	1.05	Q10567	139	0.443	Down	1.78498e-05	K	AP-1 complex subunit beta-1 OS=Homo sapiens OX=9606 GN=AP1B1 PE=1 SV=2	AP1B1	1	0.00150016	107.06	K(1)TAAVCVAK	3	1.9188	2	1.575	1.526	1.416	0.656	0.666	0.677
hsa04142 Lysosome	0.523381	6	1.05	Q00610	907	0.529	Down	7.9584e-05	K	Clathrin heavy chain 1 OS=Homo sapiens OX=9606 GN=CLTC PE=1 SV=5	CLTC	1	0.00140987	111.61	VVGK(1)YCEK	2	-0.27006	3	1.457	1.43	1.308	0.764	0.714	0.74
hsa04142 Lysosome	0.523381	6	1.05	P53675	1609	0.551	Down	5.7349e-05	K	Clathrin heavy chain 2 OS=Homo sapiens OX=9606 GN=CLTCL1 PE=1 SV=2	CLTCL1	1	0.0296677	71.451	EYLSK(1)VDK	2	0.16188	1	1.33	1.324	1.46	0.765	0.744	0.757
hsa05143 African trypanosomiasis	0.468959	1	1.84	P17252	575	0.62	Down	0.0034987	K	Protein kinase C alpha type OS=Homo sapiens OX=9606 GN=PRKCA PE=1 SV=4	PRKCA	1	0.00296928	74.92	GLMTK(1)HPAK	3	-0.94664	1	1.458	1.172	1.271	0.802	0.869	0.748
hsa04620 Toll-like receptor signaling pathway	0.801541	2	0.74	Q04206	122	0.545	Down	0.0071434	K	Transcription factor p65 OS=Homo sapiens OX=9606 GN=RELA PE=1 SV=2	RELA	1	3.64055e-22	149.32	CIHSFQNLGIQCVK(1)K	3	0.47742	1	1.382	1.379	1.378	0.794	0.785	0.676
hsa04620 Toll-like receptor signaling pathway	0.801541	2	0.74	Q04206	195	0.657	Down	4.2829e-05	K	Transcription factor p65 OS=Homo sapiens OX=9606 GN=RELA PE=1 SV=2	RELA	1	0.00217284	81.48	APNTAELK(1)ICR	2	-0.29332	1	1.29	1.233	1.264	0.806	0.824	0.857
hsa04620 Toll-like receptor signaling pathway	0.801541	2	0.74	P42224	152	0.61	Down	0.00037983	K	Signal transducer and activator of transcription 1-alpha/beta OS=Homo sapiens OX=9606 GN=STAT1 PE=1 SV=2	STAT1	1	0.00351683	63.091	DK(1)VMCIEHEIK	3	-0.25958	1	1.219	1.385	1.319	0.803	0.829	0.762
hsa00360 Phenylalanine metabolism	0.515841	2	1.23	P14174	78	0.579	Down	1.1579e-06	K	Macrophage migration inhibitory factor OS=Homo sapiens OX=9606 GN=MIF PE=1 SV=4	MIF	1	3.83319e-22	158.91	SYSK(1)LLCGLLAER	3	0.1406	8	1.323	1.366	1.333	0.787	0.762	0.78
hsa00360 Phenylalanine metabolism	0.515841	2	1.23	P47895	48	0.492	Down	6.4523e-05	K	Aldehyde dehydrogenase family 1 member A3 OS=Homo sapiens OX=9606 GN=ALDH1A3 PE=1 SV=2	ALDH1A3	1	0.00157174	86.911	K(1)FATCNPSTR	2	-0.43183	1	1.53	1.442	1.355	0.742	0.696	0.693
hsa04136 Autophagy - other	0.0733554	2	3.69	P67775	29	0.542	Down	0.0023993	K	Serine/threonine-protein phosphatase 2A catalytic subunit alpha isoform OS=Homo sapiens OX=9606 GN=PPP2CA PE=1 SV=1	PPP2CA	1	1.14086e-10	122.97	QLSESQVK(1)SLCEK	3	0.11263	1	1.225	1.535	1.379	0.801	0.66	0.784
hsa04136 Autophagy - other	0.0733554	2	3.69	Q9NT62	185	0.432	Down	1.2368e-06	K	Ubiquitin-like-conjugating enzyme ATG3 OS=Homo sapiens OX=9606 GN=ATG3 PE=1 SV=1	ATG3	1	1.2016e-27	167.41	AK(1)TDAGGEDAILQTR	2	0.5084	2	1.529	1.524	1.503	0.63	0.665	0.674
hsa03040 Spliceosome	0.95655	13	0.71	Q13838	162	0.422	Down	1.92273e-05	K	Spliceosome RNA helicase DDX39B OS=Homo sapiens OX=9606 GN=DDX39B PE=1 SV=1	DDX39B	1	0.0197688	89.827	KDEEVLK(1)K	2	-0.64126	3	1.559	1.602	1.441	0.667	0.628	0.647
hsa03040 Spliceosome	0.95655	13	0.71	Q13838	241	0.44	Down	8.2451e-07	K	Spliceosome RNA helicase DDX39B OS=Homo sapiens OX=9606 GN=DDX39B PE=1 SV=1	DDX39B	1	2.52188e-06	104.2	K(1)FMQDPMEIFVDDETK	3	0.192	1	1.517	1.49	1.519	0.687	0.659	0.647
hsa03040 Spliceosome	0.95655	13	0.71	Q00839	495	0.459	Down	6.0225e-05	K	Heterogeneous nuclear ribonucleoprotein U OS=Homo sapiens OX=9606 GN=HNRNPU PE=1 SV=6	HNRNPU	1	0.000338111	63.691	K(1)DCEVVMMIGLPGAGK	3	-1.0615	2	1.4	1.528	1.52	0.711	0.636	0.694
hsa03040 Spliceosome	0.95655	13	0.71	Q00839	387	0.38	Down	0.00023794	K	Heterogeneous nuclear ribonucleoprotein U OS=Homo sapiens OX=9606 GN=HNRNPU PE=1 SV=6	HNRNPU	1	5.34412e-06	99.344	GIK(1)TCNCETEDYGEK	3	0.12476	1	1.496	1.565	1.715	0.555	0.687	0.573
hsa03040 Spliceosome	0.95655	13	0.71	Q00839	565	0.42	Down	6.0565e-05	K	Heterogeneous nuclear ribonucleoprotein U OS=Homo sapiens OX=9606 GN=HNRNPU PE=1 SV=6	HNRNPU	1	6.4142e-07	108.09	APQCLGK(1)FIEIAAR	2	-1.2209	2	1.588	1.557	1.462	0.609	0.626	0.7
hsa03040 Spliceosome	0.95655	13	0.71	Q00839	609	0.321	Down	8.752e-07	K	Heterogeneous nuclear ribonucleoprotein U OS=Homo sapiens OX=9606 GN=HNRNPU PE=1 SV=6	HNRNPU	1	2.39004e-06	111.79	AVVVCPK(1)DEDYK	2	0.46828	2	1.735	1.64	1.692	0.524	0.563	0.54
hsa03040 Spliceosome	0.95655	13	0.71	Q00839	331	0.567	Down	0.0009375	K	Heterogeneous nuclear ribonucleoprotein U OS=Homo sapiens OX=9606 GN=HNRNPU PE=1 SV=6	HNRNPU	1	0.00140425	104.82	ASYGVSK(1)GK	2	0.25607	3	1.395	1.312	1.354	0.702	0.864	0.737
hsa03040 Spliceosome	0.95655	13	0.71	Q6P2Q9	769	0.646	Down	6.3059e-05	K	Pre-mRNA-processing-splicing factor 8 OS=Homo sapiens OX=9606 GN=PRPF8 PE=1 SV=2	PRPF8	1	3.38673e-05	124.42	GATVDK(1)TVCK	3	0.41718	2	1.316	1.238	1.266	0.852	0.803	0.814
hsa03040 Spliceosome	0.95655	13	0.71	Q15365	115	0.41	Down	0.000143537	K	Poly(rC)-binding protein 1 OS=Homo sapiens OX=9606 GN=PCBP1 PE=1 SV=2	PCBP1	1	5.1689e-10	117	LVVPATQCGSLIGK(1)GGCK	3	0.052525	1	1.487	1.646	1.511	0.621	0.582	0.702
hsa03040 Spliceosome	0.95655	13	0.71	Q9UHX1	251	0.457	Down	2.4118e-05	K	Poly(U)-binding-splicing factor PUF60 OS=Homo sapiens OX=9606 GN=PUF60 PE=1 SV=1	PUF60	1	0.000334094	105.2	SVFEAFGK(1)IK	2	-1.0713	2	1.457	1.508	1.488	0.664	0.646	0.726
hsa03040 Spliceosome	0.95655	13	0.71	P17844	197	0.252	Down	2.2599e-07	K	Probable ATP-dependent RNA helicase DDX5 OS=Homo sapiens OX=9606 GN=DDX5 PE=1 SV=1	DDX5	1	7.68943e-05	102.9	LK(1)STCIYGGAPK	3	-1.9744	2	1.857	1.777	1.81	0.443	0.473	0.458
hsa03040 Spliceosome	0.95655	13	0.71	P17844	351	0.391	Down	2.686e-06	K	Probable ATP-dependent RNA helicase DDX5 OS=Homo sapiens OX=9606 GN=DDX5 PE=1 SV=1	DDX5	1	0.00120581	112.36	TIVFVETK(1)R	2	-0.61373	2	1.629	1.536	1.571	0.611	0.645	0.596
hsa03040 Spliceosome	0.95655	13	0.71	P0DN76	15	0.269	Down	1.77129e-05	K	Splicing factor U2AF 35 kDa subunit-like protein OS=Homo sapiens OX=9606 GN=U2AF1L5 PE=1 SV=1	U2AF1L5	1	0.00108301	89.301	DK(1)VNCSFYFK	2	-1.0517	1	1.643	1.874	1.821	0.45	0.478	0.507
hsa03040 Spliceosome	0.95655	13	0.71	Q8NI27	1156	0.16	Down	0.000102576	K	THO complex subunit 2 OS=Homo sapiens OX=9606 GN=THOC2 PE=1 SV=2	THOC2	1	0.0045753	99.973	ICQEEK(1)EK	3	-1.0392	2	2.091	1.986	1.971	0.322	0.323	0.325
hsa03040 Spliceosome	0.95655	13	0.71	P09234	22	0.257	Down	5.074e-07	K	U1 small nuclear ribonucleoprotein C OS=Homo sapiens OX=9606 GN=SNRPC PE=1 SV=1	SNRPC	1	0.00671323	88.921	K(1)THCSGR	2	-0.90683	2	1.814	1.775	1.824	0.441	0.469	0.482
hsa03040 Spliceosome	0.95655	13	0.71	Q7L014	363	0.502	Down	1.5775e-05	K	Probable ATP-dependent RNA helicase DDX46 OS=Homo sapiens OX=9606 GN=DDX46 PE=1 SV=2	DDX46	1	0.000508415	92.19	LEMEGITVK(1)GK	2	1.3083	1	1.441	1.439	1.407	0.686	0.717	0.747
hsa03040 Spliceosome	0.95655	13	0.71	P52272	672	0.584	Down	0.000164518	K	Heterogeneous nuclear ribonucleoprotein M OS=Homo sapiens OX=9606 GN=HNRNPM PE=1 SV=3	HNRNPM	1	0.000134589	86.488	DK(1)FNECGHVLYADIK	4	-0.38375	2	1.424	1.289	1.298	0.794	0.745	0.802
hsa03040 Spliceosome	0.95655	13	0.71	P52272	651	0.461	Down	0.000119993	K	Heterogeneous nuclear ribonucleoprotein M OS=Homo sapiens OX=9606 GN=HNRNPM PE=1 SV=3	HNRNPM	1	0.00449966	101.25	K(1)ACQIFVR	2	0.83942	1	1.564	1.465	1.42	0.742	0.669	0.64
hsa03040 Spliceosome	0.95655	13	0.71	P52272	698	0.258	Down	5.1747e-07	K	Heterogeneous nuclear ribonucleoprotein M OS=Homo sapiens OX=9606 GN=HNRNPM PE=1 SV=3	HNRNPM	1	4.83172e-06	105.28	GCGVVK(1)FESPEVAER	3	-0.2701	5	1.819	1.824	1.767	0.461	0.488	0.447
hsa03040 Spliceosome	0.95655	13	0.71	P51991	199	0.513	Down	3.0466e-06	K	Heterogeneous nuclear ribonucleoprotein A3 OS=Homo sapiens OX=9606 GN=HNRNPA3 PE=1 SV=2	HNRNPA3	1	8.09419e-15	145.29	YHTINGHNCEVK(1)K	4	-0.83514	8	1.378	1.42	1.449	0.732	0.741	0.704
hsa03040 Spliceosome	0.95655	13	0.71	O43143	754	0.226	Down	0.00100058	K	Pre-mRNA-splicing factor ATP-dependent RNA helicase DHX15 OS=Homo sapiens OX=9606 GN=DHX15 PE=1 SV=2	DHX15	1	1.67223e-05	106.32	TCTDIK(1)PEWLVK	3	0.85098	2	1.857	1.853	1.89	0.41	0.462	0.396
hsa03040 Spliceosome	0.95655	13	0.71	O43143	230	0.632	Down	0.000135101	K	Pre-mRNA-splicing factor ATP-dependent RNA helicase DHX15 OS=Homo sapiens OX=9606 GN=DHX15 PE=1 SV=2	DHX15	1	4.53575e-05	104.7	FEDCSSAK(1)TILK	2	0.98953	1	1.32	1.221	1.321	0.801	0.842	0.796
hsa05120 Epithelial cell signaling in Helicobacter pylori infection	0.036474	7	1.99	Q04206	122	0.545	Down	0.0071434	K	Transcription factor p65 OS=Homo sapiens OX=9606 GN=RELA PE=1 SV=2	RELA	1	3.64055e-22	149.32	CIHSFQNLGIQCVK(1)K	3	0.47742	1	1.382	1.379	1.378	0.794	0.785	0.676
hsa05120 Epithelial cell signaling in Helicobacter pylori infection	0.036474	7	1.99	Q04206	195	0.657	Down	4.2829e-05	K	Transcription factor p65 OS=Homo sapiens OX=9606 GN=RELA PE=1 SV=2	RELA	1	0.00217284	81.48	APNTAELK(1)ICR	2	-0.29332	1	1.29	1.233	1.264	0.806	0.824	0.857
hsa05120 Epithelial cell signaling in Helicobacter pylori infection	0.036474	7	1.99	P60953	153	0.577	Down	0.000137319	K	Cell division control protein 42 homolog OS=Homo sapiens OX=9606 GN=CDC42 PE=1 SV=2	CDC42	1	2.59121e-13	142.45	AVK(1)YVECSALTQK	2	-0.94283	2	1.369	1.297	1.364	0.804	0.724	0.799
hsa05120 Epithelial cell signaling in Helicobacter pylori infection	0.036474	7	1.99	P21281	109	0.48	Down	5.5611e-07	K	V-type proton ATPase subunit B, brain isoform OS=Homo sapiens OX=9606 GN=ATP6V1B2 PE=1 SV=3	ATP6V1B2	1	0.000924525	87.718	K(1)TSCEFTGDILR	3	-0.37516	3	1.482	1.45	1.439	0.716	0.687	0.694
hsa05120 Epithelial cell signaling in Helicobacter pylori infection	0.036474	7	1.99	P21281	108	0.532	Down	0.0050152	K	V-type proton ATPase subunit B, brain isoform OS=Homo sapiens OX=9606 GN=ATP6V1B2 PE=1 SV=3	ATP6V1B2	1	1.83584e-08	108.14	AVVQVFEGTSGIDAK(1)K	3	0.31694	1	1.399	1.378	1.407	0.809	0.702	0.715
hsa05120 Epithelial cell signaling in Helicobacter pylori infection	0.036474	7	1.99	P38606	132	0.405	Down	1.77762e-05	K	V-type proton ATPase catalytic subunit A OS=Homo sapiens OX=9606 GN=ATP6V1A PE=1 SV=2	ATP6V1A	1	0.000353207	107.09	DIK(1)WDFTPCK	2	-0.13164	2	1.639	1.537	1.502	0.652	0.641	0.6
hsa05120 Epithelial cell signaling in Helicobacter pylori infection	0.036474	7	1.99	P36543	138	0.569	Down	2.1349e-05	K	V-type proton ATPase subunit E 1 OS=Homo sapiens OX=9606 GN=ATP6V1E1 PE=1 SV=1	ATP6V1E1	1	0.01156	85.355	K(1)QDFPLVK	3	0.41354	2	1.333	1.367	1.353	0.748	0.806	0.753
hsa05120 Epithelial cell signaling in Helicobacter pylori infection	0.036474	7	1.99	Q06124	178	0.256	Down	1.83063e-05	K	Tyrosine-protein phosphatase non-receptor type 11 OS=Homo sapiens OX=9606 GN=PTPN11 PE=1 SV=2	PTPN11	1	0.00118893	79.346	CQELK(1)YDVGGGER	2	0.10773	2	1.739	1.852	1.824	0.421	0.505	0.46
hsa05120 Epithelial cell signaling in Helicobacter pylori infection	0.036474	7	1.99	P08581	1215	0.628	Down	0.00040379	K	Hepatocyte growth factor receptor OS=Homo sapiens OX=9606 GN=MET PE=1 SV=4	MET	1	0.00254286	66.267	NCMLDEK(1)FTVK	3	0.751	1	1.339	1.257	1.279	0.794	0.872	0.766
hsa04721 Synaptic vesicle cycle	0.049095	6	2.01	P21281	109	0.48	Down	5.5611e-07	K	V-type proton ATPase subunit B, brain isoform OS=Homo sapiens OX=9606 GN=ATP6V1B2 PE=1 SV=3	ATP6V1B2	1	0.000924525	87.718	K(1)TSCEFTGDILR	3	-0.37516	3	1.482	1.45	1.439	0.716	0.687	0.694
hsa04721 Synaptic vesicle cycle	0.049095	6	2.01	P21281	108	0.532	Down	0.0050152	K	V-type proton ATPase subunit B, brain isoform OS=Homo sapiens OX=9606 GN=ATP6V1B2 PE=1 SV=3	ATP6V1B2	1	1.83584e-08	108.14	AVVQVFEGTSGIDAK(1)K	3	0.31694	1	1.399	1.378	1.407	0.809	0.702	0.715
hsa04721 Synaptic vesicle cycle	0.049095	6	2.01	P38606	132	0.405	Down	1.77762e-05	K	V-type proton ATPase catalytic subunit A OS=Homo sapiens OX=9606 GN=ATP6V1A PE=1 SV=2	ATP6V1A	1	0.000353207	107.09	DIK(1)WDFTPCK	2	-0.13164	2	1.639	1.537	1.502	0.652	0.641	0.6
hsa04721 Synaptic vesicle cycle	0.049095	6	2.01	P50570	90	0.247	Down	2.2772e-05	K	Dynamin-2 OS=Homo sapiens OX=9606 GN=DNM2 PE=1 SV=2	DNM2	1	0.007979	78.342	K(1)FTDFDEVR	2	-0.55845	1	1.768	1.787	1.917	0.504	0.415	0.435
hsa04721 Synaptic vesicle cycle	0.049095	6	2.01	P36543	138	0.569	Down	2.1349e-05	K	V-type proton ATPase subunit E 1 OS=Homo sapiens OX=9606 GN=ATP6V1E1 PE=1 SV=1	ATP6V1E1	1	0.01156	85.355	K(1)QDFPLVK	3	0.41354	2	1.333	1.367	1.353	0.748	0.806	0.753
hsa04721 Synaptic vesicle cycle	0.049095	6	2.01	Q00610	907	0.529	Down	7.9584e-05	K	Clathrin heavy chain 1 OS=Homo sapiens OX=9606 GN=CLTC PE=1 SV=5	CLTC	1	0.00140987	111.61	VVGK(1)YCEK	2	-0.27006	3	1.457	1.43	1.308	0.764	0.714	0.74
hsa04721 Synaptic vesicle cycle	0.049095	6	2.01	P53675	1609	0.551	Down	5.7349e-05	K	Clathrin heavy chain 2 OS=Homo sapiens OX=9606 GN=CLTCL1 PE=1 SV=2	CLTCL1	1	0.0296677	71.451	EYLSK(1)VDK	2	0.16188	1	1.33	1.324	1.46	0.765	0.744	0.757
hsa00480 Glutathione metabolism	0.151231	6	1.58	P23921	414	0.201	Down	1.3358e-06	K	Ribonucleoside-diphosphate reductase large subunit OS=Homo sapiens OX=9606 GN=RRM1 PE=1 SV=1	RRM1	1	3.90941e-15	159.66	K(1)SNQQNLGTIK	2	0.94274	1	1.843	2.011	1.903	0.412	0.374	0.373
hsa00480 Glutathione metabolism	0.151231	6	1.58	O75223	118	0.521	Down	0.00030397	K	Gamma-glutamylcyclotransferase OS=Homo sapiens OX=9606 GN=GGCT PE=1 SV=1	GGCT	1	6.66255e-07	118.73	VATQEGK(1)EITCR	2	0.66571	2	1.398	1.342	1.479	0.758	0.777	0.665
hsa00480 Glutathione metabolism	0.151231	6	1.58	O75223	148	0.623	Down	0.00023762	K	Gamma-glutamylcyclotransferase OS=Homo sapiens OX=9606 GN=GGCT PE=1 SV=1	GGCT	1	0.00459082	69.979	IICMGAK(1)ENGLPLEYQEK	3	-1.6952	1	1.236	1.374	1.275	0.814	0.832	0.775
hsa00480 Glutathione metabolism	0.151231	6	1.58	O75874	66	0.522	Down	5.5091e-05	K	Isocitrate dehydrogenase [NADP] cytoplasmic OS=Homo sapiens OX=9606 GN=IDH1 PE=1 SV=2	IDH1	1	0.0112286	97.798	K(1)HNVGVK	2	0.40383	1	1.436	1.413	1.369	0.765	0.688	0.748
hsa00480 Glutathione metabolism	0.151231	6	1.58	P52788	235	0.376	Down	1.8077e-06	K	Spermine synthase OS=Homo sapiens OX=9606 GN=SMS PE=1 SV=2	SMS	1	2.75366e-05	115.12	K(1)TCGDVLDNLK	2	-1.0474	1	1.618	1.61	1.576	0.604	0.627	0.573
hsa00480 Glutathione metabolism	0.151231	6	1.58	P00390	470	0.244	Down	3.3348e-06	K	Glutathione reductase, mitochondrial OS=Homo sapiens OX=9606 GN=GSR PE=1 SV=2	GSR	1	0.00839172	77.662	MVCANK(1)EEK	2	1.8422	1	1.889	1.889	1.721	0.46	0.463	0.417
hsa00480 Glutathione metabolism	0.151231	6	1.58	P52209	119	0.484	Down	1.80152e-05	K	6-phosphogluconate dehydrogenase, decarboxylating OS=Homo sapiens OX=9606 GN=PGD PE=1 SV=3	PGD	1	3.6472e-07	101.17	AK(1)GILFVGSGVSGGEEGAR	2	1.2077	1	1.533	1.433	1.39	0.704	0.709	0.697
hsa05110 Vibrio cholerae infection	0.036474	7	1.99	P63092	8	0.162	Down	1.3942e-07	K	Guanine nucleotide-binding protein G(s) subunit alpha isoforms short OS=Homo sapiens OX=9606 GN=GNAS PE=1 SV=1	GNAS	1	0.00017262	97.463	GCLGNSK(1)TEDQR	2	-0.98053	1	2.08	2.045	1.911	0.324	0.323	0.33
hsa05110 Vibrio cholerae infection	0.036474	7	1.99	P17252	575	0.62	Down	0.0034987	K	Protein kinase C alpha type OS=Homo sapiens OX=9606 GN=PRKCA PE=1 SV=4	PRKCA	1	0.00296928	74.92	GLMTK(1)HPAK	3	-0.94664	1	1.458	1.172	1.271	0.802	0.869	0.748
hsa05110 Vibrio cholerae infection	0.036474	7	1.99	P21281	109	0.48	Down	5.5611e-07	K	V-type proton ATPase subunit B, brain isoform OS=Homo sapiens OX=9606 GN=ATP6V1B2 PE=1 SV=3	ATP6V1B2	1	0.000924525	87.718	K(1)TSCEFTGDILR	3	-0.37516	3	1.482	1.45	1.439	0.716	0.687	0.694
hsa05110 Vibrio cholerae infection	0.036474	7	1.99	P21281	108	0.532	Down	0.0050152	K	V-type proton ATPase subunit B, brain isoform OS=Homo sapiens OX=9606 GN=ATP6V1B2 PE=1 SV=3	ATP6V1B2	1	1.83584e-08	108.14	AVVQVFEGTSGIDAK(1)K	3	0.31694	1	1.399	1.378	1.407	0.809	0.702	0.715
hsa05110 Vibrio cholerae infection	0.036474	7	1.99	P60468	35	0.189	Down	1.75036e-05	K	Protein transport protein Sec61 subunit beta OS=Homo sapiens OX=9606 GN=SEC61B PE=1 SV=2	SEC61B	1	0.00214134	118.04	K(1)NASCGTR	2	-0.85995	1	1.927	2.044	1.877	0.404	0.373	0.327
hsa05110 Vibrio cholerae infection	0.036474	7	1.99	P38606	132	0.405	Down	1.77762e-05	K	V-type proton ATPase catalytic subunit A OS=Homo sapiens OX=9606 GN=ATP6V1A PE=1 SV=2	ATP6V1A	1	0.000353207	107.09	DIK(1)WDFTPCK	2	-0.13164	2	1.639	1.537	1.502	0.652	0.641	0.6
hsa05110 Vibrio cholerae infection	0.036474	7	1.99	P63261	291	0.532	Down	4.2125e-05	K	Actin, cytoplasmic 2 OS=Homo sapiens OX=9606 GN=ACTG1 PE=1 SV=1	ACTG1	1	1.10521e-10	103.84	K(1)DLYANTVLSGGTTMYPGIADR	2	0.54304	5	1.347	1.356	1.477	0.746	0.756	0.72
hsa05110 Vibrio cholerae infection	0.036474	7	1.99	P36543	138	0.569	Down	2.1349e-05	K	V-type proton ATPase subunit E 1 OS=Homo sapiens OX=9606 GN=ATP6V1E1 PE=1 SV=1	ATP6V1E1	1	0.01156	85.355	K(1)QDFPLVK	3	0.41354	2	1.333	1.367	1.353	0.748	0.806	0.753
hsa05225 Hepatocellular carcinoma	0.713923	5	0.88	P17252	575	0.62	Down	0.0034987	K	Protein kinase C alpha type OS=Homo sapiens OX=9606 GN=PRKCA PE=1 SV=4	PRKCA	1	0.00296928	74.92	GLMTK(1)HPAK	3	-0.94664	1	1.458	1.172	1.271	0.802	0.869	0.748
hsa05225 Hepatocellular carcinoma	0.713923	5	0.88	P06400	65	0.464	Down	0.002224	K	Retinoblastoma-associated protein OS=Homo sapiens OX=9606 GN=RB1 PE=1 SV=2	RB1	1	0.00150538	94.114	LK(1)IPDHVR	3	-0.34904	1	1.381	1.521	1.526	0.796	0.554	0.706
hsa05225 Hepatocellular carcinoma	0.713923	5	0.88	P63261	291	0.532	Down	4.2125e-05	K	Actin, cytoplasmic 2 OS=Homo sapiens OX=9606 GN=ACTG1 PE=1 SV=1	ACTG1	1	1.10521e-10	103.84	K(1)DLYANTVLSGGTTMYPGIADR	2	0.54304	5	1.347	1.356	1.477	0.746	0.756	0.72
hsa05225 Hepatocellular carcinoma	0.713923	5	0.88	Q16881	574	0.62	Down	0.000136362	K	Thioredoxin reductase 1, cytoplasmic OS=Homo sapiens OX=9606 GN=TXNRD1 PE=1 SV=3	TXNRD1	1	1.22936e-07	102.4	CYAK(1)IICNTK	2	0.31497	2	1.238	1.324	1.328	0.786	0.784	0.843
hsa05225 Hepatocellular carcinoma	0.713923	5	0.88	P08581	1215	0.628	Down	0.00040379	K	Hepatocyte growth factor receptor OS=Homo sapiens OX=9606 GN=MET PE=1 SV=4	MET	1	0.00254286	66.267	NCMLDEK(1)FTVK	3	0.751	1	1.339	1.257	1.279	0.794	0.872	0.766
hsa00512 Mucin type O-glycan biosynthesis	0.468959	1	1.84	Q14435	577	0.622	Down	0.00055794	K	Polypeptide N-acetylgalactosaminyltransferase 3 OS=Homo sapiens OX=9606 GN=GALNT3 PE=1 SV=2	GALNT3	1	0.00432488	79.474	ACTYK(1)GHK	3	-0.062594	2	1.32	1.186	1.383	0.787	0.816	0.817
hsa04122 Sulfur relay system	0.271157	1	3.69	Q16762	14	0.602	Down	0.000136714	K	Thiosulfate sulfurtransferase OS=Homo sapiens OX=9606 GN=TST PE=1 SV=4	TST	1	4.04112e-10	123.68	ALVSTK(1)WLAESIR	2	-0.44994	1	1.32	1.255	1.377	0.814	0.808	0.758
hsa05215 Prostate cancer	0.0564121	7	1.84	Q09472	1590	0.62	Down	0.00020271	K	Histone acetyltransferase p300 OS=Homo sapiens OX=9606 GN=EP300 PE=1 SV=2	EP300	1	0.00029002	91.867	LYATMEK(1)HK	3	-0.76884	4	1.377	1.286	1.238	0.838	0.789	0.79
hsa05215 Prostate cancer	0.0564121	7	1.84	Q04206	122	0.545	Down	0.0071434	K	Transcription factor p65 OS=Homo sapiens OX=9606 GN=RELA PE=1 SV=2	RELA	1	3.64055e-22	149.32	CIHSFQNLGIQCVK(1)K	3	0.47742	1	1.382	1.379	1.378	0.794	0.785	0.676
hsa05215 Prostate cancer	0.0564121	7	1.84	Q04206	195	0.657	Down	4.2829e-05	K	Transcription factor p65 OS=Homo sapiens OX=9606 GN=RELA PE=1 SV=2	RELA	1	0.00217284	81.48	APNTAELK(1)ICR	2	-0.29332	1	1.29	1.233	1.264	0.806	0.824	0.857
hsa05215 Prostate cancer	0.0564121	7	1.84	P08238	559	0.479	Down	1.56421e-05	K	Heat shock protein HSP 90-beta OS=Homo sapiens OX=9606 GN=HSP90AB1 PE=1 SV=4	HSP90AB1	1	0.00072324	111.17	AK(1)FENLCK	3	-0.027707	2	1.508	1.469	1.398	0.714	0.677	0.704
hsa05215 Prostate cancer	0.0564121	7	1.84	P08238	568	0.153	Down	1.0451e-06	K	Heat shock protein HSP 90-beta OS=Homo sapiens OX=9606 GN=HSP90AB1 PE=1 SV=4	HSP90AB1	1	0.0129056	82.417	LMK(1)EILDK	2	-0.52759	1	2.117	2.005	1.986	0.335	0.306	0.291
hsa05215 Prostate cancer	0.0564121	7	1.84	P08238	557	0.623	Down	1.2245e-06	K	Heat shock protein HSP 90-beta OS=Homo sapiens OX=9606 GN=HSP90AB1 PE=1 SV=4	HSP90AB1	1	0.0285507	80.219	MEESK(1)AK	2	0.84477	2	1.31	1.303	1.275	0.801	0.799	0.821
hsa05215 Prostate cancer	0.0564121	7	1.84	P06400	65	0.464	Down	0.002224	K	Retinoblastoma-associated protein OS=Homo sapiens OX=9606 GN=RB1 PE=1 SV=2	RB1	1	0.00150538	94.114	LK(1)IPDHVR	3	-0.34904	1	1.381	1.521	1.526	0.796	0.554	0.706
hsa05215 Prostate cancer	0.0564121	7	1.84	Q58FF8	332	0.479	Down	1.56421e-05	K	Putative heat shock protein HSP 90-beta 2 OS=Homo sapiens OX=9606 GN=HSP90AB2P PE=1 SV=2	HSP90AB2P	1	0.00072324	111.17	AK(1)FENLCK	3	-0.027707	2	1.508	1.469	1.398	0.714	0.677	0.704
hsa05215 Prostate cancer	0.0564121	7	1.84	P07900	567	0.531	Down	2.4582e-05	K	Heat shock protein HSP 90-alpha OS=Homo sapiens OX=9606 GN=HSP90AA1 PE=1 SV=5	HSP90AA1	1	0.000535464	107.01	TK(1)FENLCK	3	0.23519	3	1.473	1.347	1.365	0.728	0.755	0.74
hsa05215 Prostate cancer	0.0564121	7	1.84	P07900	576	0.235	Down	5.6281e-07	K	Heat shock protein HSP 90-alpha OS=Homo sapiens OX=9606 GN=HSP90AA1 PE=1 SV=5	HSP90AA1	1	0.00316475	93.096	IMK(1)DILEK	3	0.51489	4	1.881	1.876	1.791	0.418	0.456	0.43
hsa05215 Prostate cancer	0.0564121	7	1.84	Q6A1A2	277	0.634	Down	0.006397	K	Putative 3-phosphoinositide-dependent protein kinase 2 OS=Homo sapiens OX=9606 GN=PDPK2P PE=5 SV=1	PDPK2P	1	0.00344264	56.205	LEYDFPEK(1)FFPK	3	1.5294	1	1.1	1.286	1.462	0.823	0.773	0.842
hsa04724 Glutamatergic synapse	0.144387	4	1.84	P63092	8	0.162	Down	1.3942e-07	K	Guanine nucleotide-binding protein G(s) subunit alpha isoforms short OS=Homo sapiens OX=9606 GN=GNAS PE=1 SV=1	GNAS	1	0.00017262	97.463	GCLGNSK(1)TEDQR	2	-0.98053	1	2.08	2.045	1.911	0.324	0.323	0.33
hsa04724 Glutamatergic synapse	0.144387	4	1.84	P17252	575	0.62	Down	0.0034987	K	Protein kinase C alpha type OS=Homo sapiens OX=9606 GN=PRKCA PE=1 SV=4	PRKCA	1	0.00296928	74.92	GLMTK(1)HPAK	3	-0.94664	1	1.458	1.172	1.271	0.802	0.869	0.748
hsa04724 Glutamatergic synapse	0.144387	4	1.84	P63098	91	0.609	Down	2.1079e-05	K	Calcineurin subunit B type 1 OS=Homo sapiens OX=9606 GN=PPP3R1 PE=1 SV=2	PPP3R1	0.992001	0.0310274	51.528	GDK(0.008)EQK(0.992)LR	3	1.0201	1	1.276	1.344	1.307	0.772	0.811	0.808
hsa04724 Glutamatergic synapse	0.144387	4	1.84	Q14573	258	0.471	Down	3.6728e-06	K	Inositol 1,4,5-trisphosphate receptor type 3 OS=Homo sapiens OX=9606 GN=ITPR3 PE=1 SV=2	ITPR3	1	0.000333363	105.13	FLTCDEYK(1)GK	2	-1.2035	2	1.529	1.425	1.454	0.707	0.674	0.693
hsa00230 Purine metabolism	0.71033	7	0.89	P12268	257	0.594	Down	1.57662e-05	K	Inosine-5'-monophosphate dehydrogenase 2 OS=Homo sapiens OX=9606 GN=IMPDH2 PE=1 SV=2	IMPDH2	1	7.81411e-14	124.68	QLLCGAAIGTHEDDK(1)YR	3	-0.41629	1	1.335	1.358	1.282	0.774	0.799	0.789
hsa00230 Purine metabolism	0.71033	7	0.89	P12268	242	0.477	Down	4.2938e-05	K	Inosine-5'-monophosphate dehydrogenase 2 OS=Homo sapiens OX=9606 GN=IMPDH2 PE=1 SV=2	IMPDH2	1	7.99619e-10	116.13	K(1)QLLCGAAIGTHEDDKYR	4	-0.11491	2	1.559	1.417	1.411	0.705	0.718	0.668
hsa00230 Purine metabolism	0.71033	7	0.89	P23921	414	0.201	Down	1.3358e-06	K	Ribonucleoside-diphosphate reductase large subunit OS=Homo sapiens OX=9606 GN=RRM1 PE=1 SV=1	RRM1	1	3.90941e-15	159.66	K(1)SNQQNLGTIK	2	0.94274	1	1.843	2.011	1.903	0.412	0.374	0.373
hsa00230 Purine metabolism	0.71033	7	0.89	Q8TCD5	112	0.502	Down	0.00010081	K	5'(3')-deoxyribonucleotidase, cytosolic type OS=Homo sapiens OX=9606 GN=NT5C PE=1 SV=2	NT5C	1	0.000397329	86.882	YHHCVGEK(1)YR	3	-1.1466	4	1.441	1.4	1.446	0.68	0.78	0.69
hsa00230 Purine metabolism	0.71033	7	0.89	P22102	162	0.427	Down	2.4813e-06	K	Trifunctional purine biosynthetic protein adenosine-3 OS=Homo sapiens OX=9606 GN=GART PE=1 SV=1	GART	1	0.00700052	87.476	GVIVAK(1)SK	2	-0.25976	2	1.559	1.531	1.49	0.669	0.664	0.624
hsa00230 Purine metabolism	0.71033	7	0.89	P22102	164	0.214	Down	2.5844e-07	K	Trifunctional purine biosynthetic protein adenosine-3 OS=Homo sapiens OX=9606 GN=GART PE=1 SV=1	GART	1	0.00633056	105.52	SK(1)EEACK	2	-0.90208	1	1.917	1.882	1.877	0.398	0.392	0.426
hsa00230 Purine metabolism	0.71033	7	0.89	P30566	402	0.291	Down	1.82115e-05	K	Adenylosuccinate lyase OS=Homo sapiens OX=9606 GN=ADSL PE=1 SV=2	ADSL	1	0.0109968	85.533	QDCHEK(1)IR	2	-0.15072	2	1.721	1.685	1.818	0.519	0.539	0.464
hsa00230 Purine metabolism	0.71033	7	0.89	P22234	286	0.537	Down	0.000181891	K	Multifunctional protein ADE2 OS=Homo sapiens OX=9606 GN=PAICS PE=1 SV=3	PAICS	1	2.20743e-08	119.87	K(1)ACGNFGIPCELR	2	-2.213	1	1.354	1.511	1.298	0.761	0.735	0.738
hsa00230 Purine metabolism	0.71033	7	0.89	P14618	162	0.464	Down	0.00025908	K	Pyruvate kinase PKM OS=Homo sapiens OX=9606 GN=PKM PE=1 SV=4	PKM	1	6.49953e-05	90.725	CDENILWLDYK(1)NICK	3	-0.11353	1	1.459	1.39	1.578	0.656	0.756	0.643
hsa00230 Purine metabolism	0.71033	7	0.89	P14618	322	0.414	Down	1.32e-06	K	Pyruvate kinase PKM OS=Homo sapiens OX=9606 GN=PKM PE=1 SV=4	PKM	1	4.11221e-09	110.12	AGK(1)PVICATQMLESMIK	3	0.3365	2	1.583	1.521	1.528	0.626	0.629	0.664
hsa00510 N-Glycan biosynthesis	0.537414	3	1.11	P04843	538	0.417	Down	1.3213e-07	K	Dolichyl-diphosphooligosaccharide--protein glycosyltransferase subunit 1 OS=Homo sapiens OX=9606 GN=RPN1 PE=1 SV=1	RPN1	1	0.000596927	91.62	LK(1)TEGSDLCDR	3	-0.056382	2	1.554	1.514	1.55	0.636	0.655	0.637
hsa00510 N-Glycan biosynthesis	0.537414	3	1.11	Q14697	39	0.515	Down	0.0021246	K	Neutral alpha-glucosidase AB OS=Homo sapiens OX=9606 GN=GANAB PE=1 SV=3	GANAB	1	7.63283e-05	92.939	SNFK(1)TCEESSFCK	2	-0.62806	2	1.478	1.334	1.432	0.733	0.722	0.73
hsa00510 N-Glycan biosynthesis	0.537414	3	1.11	Q14697	48	0.5	Down	0.00021737	K	Neutral alpha-glucosidase AB OS=Homo sapiens OX=9606 GN=GANAB PE=1 SV=3	GANAB	1	0.000244895	112.13	TCEESSFCK(1)R	2	-1.341	1	1.36	1.529	1.403	0.682	0.775	0.687
hsa00510 N-Glycan biosynthesis	0.537414	3	1.11	Q9Y673	126	0.565	Down	2.3635e-05	K	Dolichyl-phosphate beta-glucosyltransferase OS=Homo sapiens OX=9606 GN=ALG5 PE=1 SV=1	ALG5	1	0.00204129	91.549	YCQK(1)YGSDK	2	-0.55465	2	1.327	1.355	1.387	0.789	0.779	0.732
hsa04710 Circadian rhythm	0.468959	1	1.84	P63208	57	0.597	Down	0.00132271	K	S-phase kinase-associated protein 1 OS=Homo sapiens OX=9606 GN=SKP1 PE=1 SV=2	SKP1	1	0.00614248	64.82	K(1)VIQWCTHHK	4	0.12478	1	1.273	1.335	1.362	0.877	0.784	0.708
hsa04710 Circadian rhythm	0.468959	1	1.84	P63208	66	0.411	Down	3.6657e-05	K	S-phase kinase-associated protein 1 OS=Homo sapiens OX=9606 GN=SKP1 PE=1 SV=2	SKP1	1	2.05841e-10	84.327	VIQWCTHHK(1)DDPPPPEDDENKEK	5	0.029289	1	1.562	1.461	1.627	0.671	0.605	0.633
hsa04910 Insulin signaling pathway	0.575164	6	1.01	P49327	1995	0.533	Down	0.0028042	K	Fatty acid synthase OS=Homo sapiens OX=9606 GN=FASN PE=1 SV=3	FASN	1	0.00337403	78.287	PK(1)YSGTLNLDR	2	0.24659	1	1.54	1.495	1.149	0.716	0.763	0.749
hsa04910 Insulin signaling pathway	0.575164	6	1.01	P49327	1993	0.548	Down	0.0055396	K	Fatty acid synthase OS=Homo sapiens OX=9606 GN=FASN PE=1 SV=3	FASN	1	2.1213e-06	79.489	DGLLENQTPEFFQDVCK(1)PK	4	-0.92075	2	1.365	1.363	1.393	0.691	0.761	0.805
hsa04910 Insulin signaling pathway	0.575164	6	1.01	P49327	2449	0.639	Down	0.000163237	K	Fatty acid synthase OS=Homo sapiens OX=9606 GN=FASN PE=1 SV=3	FASN	1	4.31904e-16	118.54	AK(1)TGGAYGEDLGADYNLSQVCDGK	3	-0.48673	2	1.251	1.262	1.326	0.855	0.778	0.821
hsa04910 Insulin signaling pathway	0.575164	6	1.01	P62136	41	0.561	Down	0.000119643	K	Serine/threonine-protein phosphatase PP1-alpha catalytic subunit OS=Homo sapiens OX=9606 GN=PPP1CA PE=1 SV=1	PPP1CA	1	0.0182236	88.954	GLCLK(1)SR	2	0.99693	1	1.421	1.279	1.382	0.769	0.732	0.791
hsa04910 Insulin signaling pathway	0.575164	6	1.01	P10644	367	0.327	Down	2.0587e-06	K	cAMP-dependent protein kinase type I-alpha regulatory subunit OS=Homo sapiens OX=9606 GN=PRKAR1A PE=1 SV=1	PRKAR1A	1	6.36671e-05	106.67	VLGPCSDILK(1)R	2	-0.67679	1	1.637	1.64	1.76	0.573	0.538	0.536
hsa04910 Insulin signaling pathway	0.575164	6	1.01	P13861	379	0.477	Down	2.2538e-05	K	cAMP-dependent protein kinase type II-alpha regulatory subunit OS=Homo sapiens OX=9606 GN=PRKAR2A PE=1 SV=2	PRKAR2A	1	0.00222902	71.03	LLGPCMDIMK(1)R	3	-0.51879	2	1.403	1.491	1.483	0.719	0.659	0.711
hsa04910 Insulin signaling pathway	0.575164	6	1.01	Q6A1A2	277	0.634	Down	0.006397	K	Putative 3-phosphoinositide-dependent protein kinase 2 OS=Homo sapiens OX=9606 GN=PDPK2P PE=5 SV=1	PDPK2P	1	0.00344264	56.205	LEYDFPEK(1)FFPK	3	1.5294	1	1.1	1.286	1.462	0.823	0.773	0.842
hsa04910 Insulin signaling pathway	0.575164	6	1.01	P11216	370	0.402	Down	1.56336e-05	K	Glycogen phosphorylase, brain form OS=Homo sapiens OX=9606 GN=PYGB PE=1 SV=5	PYGB	1	0.00904633	101.43	AWEITK(1)K	3	-0.31142	2	1.604	1.571	1.509	0.623	0.662	0.6
hsa00072 Synthesis and degradation of ketone bodies	0.00533098	4	3.69	Q01581	46	0.589	Down	0.00028449	K	Hydroxymethylglutaryl-CoA synthase, cytoplasmic OS=Homo sapiens OX=9606 GN=HMGCS1 PE=1 SV=2	HMGCS1	1	0.000108216	82.349	YDGVDAGK(1)YTIGLGQAK	3	0.48089	1	1.369	1.3	1.32	0.727	0.781	0.841
hsa00072 Synthesis and degradation of ketone bodies	0.00533098	4	3.69	Q01581	239	0.441	Down	1.9395e-06	K	Hydroxymethylglutaryl-CoA synthase, cytoplasmic OS=Homo sapiens OX=9606 GN=HMGCS1 PE=1 SV=2	HMGCS1	1	0.00927854	73.665	K(1)IHAQWQK	3	1.6118	1	1.512	1.486	1.52	0.636	0.684	0.674
hsa00072 Synthesis and degradation of ketone bodies	0.00533098	4	3.69	Q01581	409	0.372	Down	0.00050154	K	Hydroxymethylglutaryl-CoA synthase, cytoplasmic OS=Homo sapiens OX=9606 GN=HMGCS1 PE=1 SV=2	HMGCS1	1	1.88095e-06	130.1	ITASLCDLK(1)SR	3	-0.19613	2	1.635	1.652	1.534	0.555	0.713	0.525
hsa00072 Synthesis and degradation of ketone bodies	0.00533098	4	3.69	P35914	137	0.498	Down	0.00026353	K	Hydroxymethylglutaryl-CoA lyase, mitochondrial OS=Homo sapiens OX=9606 GN=HMGCL PE=1 SV=2	HMGCL	1	1.48048e-28	176.83	K(1)NINCSIEESFQR	3	0.46393	3	1.382	1.441	1.469	0.652	0.7	0.787
hsa00072 Synthesis and degradation of ketone bodies	0.00533098	4	3.69	P35914	48	0.514	Down	1.7386e-06	K	Hydroxymethylglutaryl-CoA lyase, mitochondrial OS=Homo sapiens OX=9606 GN=HMGCL PE=1 SV=2	HMGCL	1	8.45526e-28	168.69	DGLQNEK(1)NIVSTPVK	2	-0.42963	3	1.44	1.397	1.407	0.751	0.717	0.715
hsa00072 Synthesis and degradation of ketone bodies	0.00533098	4	3.69	P54868	447	0.607	Down	5.5129e-07	K	Hydroxymethylglutaryl-CoA synthase, mitochondrial OS=Homo sapiens OX=9606 GN=HMGCS2 PE=1 SV=1	HMGCS2	1	0.000987534	89.356	LVSSTSDLPK(1)R	2	-1.376	1	1.336	1.296	1.305	0.802	0.789	0.797
hsa00072 Synthesis and degradation of ketone bodies	0.00533098	4	3.69	P54868	354	0.578	Down	0.00040217	K	Hydroxymethylglutaryl-CoA synthase, mitochondrial OS=Homo sapiens OX=9606 GN=HMGCS2 PE=1 SV=1	HMGCS2	1	0.0029114	109.66	DLDK(1)ALLK	2	0.83311	1	1.423	1.339	1.266	0.801	0.72	0.809
hsa00072 Synthesis and degradation of ketone bodies	0.00533098	4	3.69	P54868	83	0.6	Down	3.4778e-06	K	Hydroxymethylglutaryl-CoA synthase, mitochondrial OS=Homo sapiens OX=9606 GN=HMGCS2 PE=1 SV=1	HMGCS2	1	5.39364e-09	116.6	YNNVEAGK(1)YTVGLGQTR	2	0.99562	2	1.335	1.313	1.31	0.804	0.804	0.767
hsa00072 Synthesis and degradation of ketone bodies	0.00533098	4	3.69	P54868	310	0.49	Down	0.000137702	K	Hydroxymethylglutaryl-CoA synthase, mitochondrial OS=Homo sapiens OX=9606 GN=HMGCS2 PE=1 SV=1	HMGCS2	1	0.0108676	85.744	MVQK(1)SLAR	2	-1.7814	1	1.406	1.493	1.427	0.645	0.72	0.754
hsa00072 Synthesis and degradation of ketone bodies	0.00533098	4	3.69	P24752	174	0.297	Down	3.2579e-06	K	Acetyl-CoA acetyltransferase, mitochondrial OS=Homo sapiens OX=9606 GN=ACAT1 PE=1 SV=1	ACAT1	1	0.000149298	75.018	GSTPYGGVK(1)LEDLIVK	3	0.042257	1	1.807	1.635	1.755	0.54	0.495	0.509
hsa04510 Focal adhesion	0.321162	12	1.16	P21333	578	0.272	Down	6.0056e-08	K	Filamin-A OS=Homo sapiens OX=9606 GN=FLNA PE=1 SV=4	FLNA	1	0.000120036	101.56	VGTECGNQK(1)VR	2	-0.21816	1	1.73	1.815	1.784	0.486	0.476	0.485
hsa04510 Focal adhesion	0.321162	12	1.16	P21333	2000	0.359	Down	1.8799e-07	K	Filamin-A OS=Homo sapiens OX=9606 GN=FLNA PE=1 SV=4	FLNA	1	0.0408648	66.692	EEPCLLK(1)R	2	-0.50213	1	1.675	1.62	1.586	0.582	0.588	0.583
hsa04510 Focal adhesion	0.321162	12	1.16	P21333	1450	0.495	Down	6.2437e-05	K	Filamin-A OS=Homo sapiens OX=9606 GN=FLNA PE=1 SV=4	FLNA	1	0.00011233	90.793	VPVHDVTDASK(1)VK	3	0.48724	1	1.479	1.441	1.393	0.691	0.679	0.764
hsa04510 Focal adhesion	0.321162	12	1.16	P17252	575	0.62	Down	0.0034987	K	Protein kinase C alpha type OS=Homo sapiens OX=9606 GN=PRKCA PE=1 SV=4	PRKCA	1	0.00296928	74.92	GLMTK(1)HPAK	3	-0.94664	1	1.458	1.172	1.271	0.802	0.869	0.748
hsa04510 Focal adhesion	0.321162	12	1.16	P60953	153	0.577	Down	0.000137319	K	Cell division control protein 42 homolog OS=Homo sapiens OX=9606 GN=CDC42 PE=1 SV=2	CDC42	1	2.59121e-13	142.45	AVK(1)YVECSALTQK	2	-0.94283	2	1.369	1.297	1.364	0.804	0.724	0.799
hsa04510 Focal adhesion	0.321162	12	1.16	P18206	316	0.374	Down	3.9318e-05	K	Vinculin OS=Homo sapiens OX=9606 GN=VCL PE=1 SV=4	VCL	1	0.0100094	72.34	VGELCAGK(1)ER	2	-1.6995	1	1.722	1.618	1.478	0.627	0.582	0.593
hsa04510 Focal adhesion	0.321162	12	1.16	O75369	2530	0.633	Down	0.0030407	K	Filamin-B OS=Homo sapiens OX=9606 GN=FLNB PE=1 SV=2	FLNB	1	3.33764e-08	107.35	AFVGQK(1)SSFLVDCSK	3	-1.854	1	1.148	1.351	1.348	0.758	0.791	0.886
hsa04510 Focal adhesion	0.321162	12	1.16	P16144	834	0.349	Down	1.481e-06	K	Integrin beta-4 OS=Homo sapiens OX=9606 GN=ITGB4 PE=1 SV=5	ITGB4	1	1.56452e-06	115.12	LCTENLLK(1)PDTR	3	-0.48166	2	1.603	1.662	1.661	0.6	0.55	0.57
hsa04510 Focal adhesion	0.321162	12	1.16	P08581	1215	0.628	Down	0.00040379	K	Hepatocyte growth factor receptor OS=Homo sapiens OX=9606 GN=MET PE=1 SV=4	MET	1	0.00254286	66.267	NCMLDEK(1)FTVK	3	0.751	1	1.339	1.257	1.279	0.794	0.872	0.766
hsa04510 Focal adhesion	0.321162	12	1.16	P62136	41	0.561	Down	0.000119643	K	Serine/threonine-protein phosphatase PP1-alpha catalytic subunit OS=Homo sapiens OX=9606 GN=PPP1CA PE=1 SV=1	PPP1CA	1	0.0182236	88.954	GLCLK(1)SR	2	0.99693	1	1.421	1.279	1.382	0.769	0.732	0.791
hsa04510 Focal adhesion	0.321162	12	1.16	P63261	291	0.532	Down	4.2125e-05	K	Actin, cytoplasmic 2 OS=Homo sapiens OX=9606 GN=ACTG1 PE=1 SV=1	ACTG1	1	1.10521e-10	103.84	K(1)DLYANTVLSGGTTMYPGIADR	2	0.54304	5	1.347	1.356	1.477	0.746	0.756	0.72
hsa04510 Focal adhesion	0.321162	12	1.16	Q9Y490	2445	0.279	Down	2.4271e-06	K	Talin-1 OS=Homo sapiens OX=9606 GN=TLN1 PE=1 SV=3	TLN1	1	2.8004e-05	114.7	VK(1)ADQDSEAMK	2	-0.094946	1	1.709	1.766	1.815	0.526	0.472	0.478
hsa04510 Focal adhesion	0.321162	12	1.16	Q6A1A2	277	0.634	Down	0.006397	K	Putative 3-phosphoinositide-dependent protein kinase 2 OS=Homo sapiens OX=9606 GN=PDPK2P PE=5 SV=1	PDPK2P	1	0.00344264	56.205	LEYDFPEK(1)FFPK	3	1.5294	1	1.1	1.286	1.462	0.823	0.773	0.842
hsa04510 Focal adhesion	0.321162	12	1.16	P61586	104	0.588	Down	4.1025e-05	K	Transforming protein RhoA OS=Homo sapiens OX=9606 GN=RHOA PE=1 SV=1	RHOA	1	5.97999e-08	100.02	WTPEVK(1)HFCPNVPIILVGNK	4	0.21964	2	1.315	1.323	1.356	0.779	0.749	0.819
hsa04913 Ovarian steroidogenesis	0.718359	1	0.92	P63092	8	0.162	Down	1.3942e-07	K	Guanine nucleotide-binding protein G(s) subunit alpha isoforms short OS=Homo sapiens OX=9606 GN=GNAS PE=1 SV=1	GNAS	1	0.00017262	97.463	GCLGNSK(1)TEDQR	2	-0.98053	1	2.08	2.045	1.911	0.324	0.323	0.33
hsa00630 Glyoxylate and dicarboxylate metabolism	0.552581	4	1.05	P34897	302	0.66	Down	0.00046058	K	Serine hydroxymethyltransferase, mitochondrial OS=Homo sapiens OX=9606 GN=SHMT2 PE=1 SV=3	SHMT2	1	0.0286974	72.042	AVDPK(1)TGR	2	-0.32398	1	1.311	1.294	1.179	0.866	0.823	0.807
hsa00630 Glyoxylate and dicarboxylate metabolism	0.552581	4	1.05	P34897	95	0.546	Down	0.000155825	K	Serine hydroxymethyltransferase, mitochondrial OS=Homo sapiens OX=9606 GN=SHMT2 PE=1 SV=3	SHMT2	1	7.16981e-08	68.952	AALEALGSCLNNK(1)YSEGYPGK	4	-0.17392	1	1.351	1.338	1.439	0.709	0.741	0.804
hsa00630 Glyoxylate and dicarboxylate metabolism	0.552581	4	1.05	P09622	66	0.426	Down	0.00164226	K	Dihydrolipoyl dehydrogenase, mitochondrial OS=Homo sapiens OX=9606 GN=DLD PE=1 SV=2	DLD	1	6.84578e-17	148.57	AAQLGFK(1)TVCIEK	2	0.7406	2	1.537	1.514	1.534	0.697	0.632	0.626
hsa00630 Glyoxylate and dicarboxylate metabolism	0.552581	4	1.05	P21399	56	0.541	Down	1.82554e-05	K	Cytoplasmic aconitate hydratase OS=Homo sapiens OX=9606 GN=ACO1 PE=1 SV=3	ACO1	1	0.00145925	94.767	NCDEFLVK(1)K	2	-0.80071	1	1.345	1.425	1.377	0.744	0.774	0.726
hsa00630 Glyoxylate and dicarboxylate metabolism	0.552581	4	1.05	P24752	174	0.297	Down	3.2579e-06	K	Acetyl-CoA acetyltransferase, mitochondrial OS=Homo sapiens OX=9606 GN=ACAT1 PE=1 SV=1	ACAT1	1	0.000149298	75.018	GSTPYGGVK(1)LEDLIVK	3	0.042257	1	1.807	1.635	1.755	0.54	0.495	0.509
hsa04713 Circadian entrainment	0.144387	4	1.84	P63092	8	0.162	Down	1.3942e-07	K	Guanine nucleotide-binding protein G(s) subunit alpha isoforms short OS=Homo sapiens OX=9606 GN=GNAS PE=1 SV=1	GNAS	1	0.00017262	97.463	GCLGNSK(1)TEDQR	2	-0.98053	1	2.08	2.045	1.911	0.324	0.323	0.33
hsa04713 Circadian entrainment	0.144387	4	1.84	P17252	575	0.62	Down	0.0034987	K	Protein kinase C alpha type OS=Homo sapiens OX=9606 GN=PRKCA PE=1 SV=4	PRKCA	1	0.00296928	74.92	GLMTK(1)HPAK	3	-0.94664	1	1.458	1.172	1.271	0.802	0.869	0.748
hsa04713 Circadian entrainment	0.144387	4	1.84	Q13557	292	0.489	Down	0.00073807	K	Calcium/calmodulin-dependent protein kinase type II subunit delta OS=Homo sapiens OX=9606 GN=CAMK2D PE=1 SV=3	CAMK2D	1	0.0244498	51.436	QETVDCLK(1)K	3	0.21401	1	1.637	1.358	1.344	0.655	0.756	0.712
hsa04713 Circadian entrainment	0.144387	4	1.84	Q14573	258	0.471	Down	3.6728e-06	K	Inositol 1,4,5-trisphosphate receptor type 3 OS=Homo sapiens OX=9606 GN=ITPR3 PE=1 SV=2	ITPR3	1	0.000333363	105.13	FLTCDEYK(1)GK	2	-1.2035	2	1.529	1.425	1.454	0.707	0.674	0.693
hsa04970 Salivary secretion	0.374653	3	1.38	P63092	8	0.162	Down	1.3942e-07	K	Guanine nucleotide-binding protein G(s) subunit alpha isoforms short OS=Homo sapiens OX=9606 GN=GNAS PE=1 SV=1	GNAS	1	0.00017262	97.463	GCLGNSK(1)TEDQR	2	-0.98053	1	2.08	2.045	1.911	0.324	0.323	0.33
hsa04970 Salivary secretion	0.374653	3	1.38	P17252	575	0.62	Down	0.0034987	K	Protein kinase C alpha type OS=Homo sapiens OX=9606 GN=PRKCA PE=1 SV=4	PRKCA	1	0.00296928	74.92	GLMTK(1)HPAK	3	-0.94664	1	1.458	1.172	1.271	0.802	0.869	0.748
hsa04970 Salivary secretion	0.374653	3	1.38	Q14573	258	0.471	Down	3.6728e-06	K	Inositol 1,4,5-trisphosphate receptor type 3 OS=Homo sapiens OX=9606 GN=ITPR3 PE=1 SV=2	ITPR3	1	0.000333363	105.13	FLTCDEYK(1)GK	2	-1.2035	2	1.529	1.425	1.454	0.707	0.674	0.693
hsa04978 Mineral absorption	0.718359	1	0.92	P30519	133	0.51	Down	0.00188412	K	Heme oxygenase 2 OS=Homo sapiens OX=9606 GN=HMOX2 PE=1 SV=2	HMOX2	1	0.017062	79.128	AAQK(1)YVER	2	0.63827	1	1.37	1.485	1.399	0.656	0.859	0.654
hsa04110 Cell cycle	0.318806	10	1.19	Q09472	1590	0.62	Down	0.00020271	K	Histone acetyltransferase p300 OS=Homo sapiens OX=9606 GN=EP300 PE=1 SV=2	EP300	1	0.00029002	91.867	LYATMEK(1)HK	3	-0.76884	4	1.377	1.286	1.238	0.838	0.789	0.79
hsa04110 Cell cycle	0.318806	10	1.19	O43684	324	0.666	Down	0.00171821	K	Mitotic checkpoint protein BUB3 OS=Homo sapiens OX=9606 GN=BUB3 PE=1 SV=1	BUB3	0.931888	0.00111269	60.549	QVTDAETK(0.068)PK(0.932)SPCT	3	-3.2019	1	1.201	1.28	1.279	0.808	0.919	0.778
hsa04110 Cell cycle	0.318806	10	1.19	P06400	65	0.464	Down	0.002224	K	Retinoblastoma-associated protein OS=Homo sapiens OX=9606 GN=RB1 PE=1 SV=2	RB1	1	0.00150538	94.114	LK(1)IPDHVR	3	-0.34904	1	1.381	1.521	1.526	0.796	0.554	0.706
hsa04110 Cell cycle	0.318806	10	1.19	Q14566	95	0.26	Down	3.3796e-08	K	DNA replication licensing factor MCM6 OS=Homo sapiens OX=9606 GN=MCM6 PE=1 SV=1	MCM6	1	0.00983915	99.442	ALK(1)TFVK	2	1.4358	1	1.82	1.826	1.754	0.469	0.471	0.463
hsa04110 Cell cycle	0.318806	10	1.19	P63208	57	0.597	Down	0.00132271	K	S-phase kinase-associated protein 1 OS=Homo sapiens OX=9606 GN=SKP1 PE=1 SV=2	SKP1	1	0.00614248	64.82	K(1)VIQWCTHHK	4	0.12478	1	1.273	1.335	1.362	0.877	0.784	0.708
hsa04110 Cell cycle	0.318806	10	1.19	P63208	66	0.411	Down	3.6657e-05	K	S-phase kinase-associated protein 1 OS=Homo sapiens OX=9606 GN=SKP1 PE=1 SV=2	SKP1	1	2.05841e-10	84.327	VIQWCTHHK(1)DDPPPPEDDENKEK	5	0.029289	1	1.562	1.461	1.627	0.671	0.605	0.633
hsa04110 Cell cycle	0.318806	10	1.19	O14757	53	0.504	Down	2.4938e-05	K	Serine/threonine-protein kinase Chk1 OS=Homo sapiens OX=9606 GN=CHEK1 PE=1 SV=2	CHEK1	1	0.000367894	107.06	AVDCPENIK(1)K	2	-0.18789	1	1.351	1.44	1.483	0.713	0.7	0.742
hsa04110 Cell cycle	0.318806	10	1.19	Q8N3U4	62	0.666	Down	0.0046971	K	Cohesin subunit SA-2 OS=Homo sapiens OX=9606 GN=STAG2 PE=1 SV=3	STAG2	1	0.0134949	70.272	GGNGGGK(1)PPSGPNR	2	0.40932	1	1.387	1.235	1.144	0.835	0.773	0.9
hsa04110 Cell cycle	0.318806	10	1.19	Q8N3U4	55	0.661	Down	3.93e-05	K	Cohesin subunit SA-2 OS=Homo sapiens OX=9606 GN=STAG2 PE=1 SV=3	STAG2	0.999999	0.000191441	89.466	GK(1)GGNGGGKPPSGPNR	3	-0.55075	1	1.276	1.228	1.272	0.859	0.811	0.826
hsa04110 Cell cycle	0.318806	10	1.19	Q13547	412	0.47	Down	0.0032599	K	Histone deacetylase 1 OS=Homo sapiens OX=9606 GN=HDAC1 PE=1 SV=1	HDAC1	1	0.00172616	93.096	ISICSSDK(1)R	2	-1.0844	1	1.453	1.472	1.484	0.747	0.681	0.645
hsa04110 Cell cycle	0.318806	10	1.19	P78527	117	0.428	Down	0.0006389	K	DNA-dependent protein kinase catalytic subunit OS=Homo sapiens OX=9606 GN=PRKDC PE=1 SV=3	PRKDC	1	0.00114791	88.075	NTCTSVYTK(1)DR	2	2.0058	1	1.369	1.529	1.672	0.637	0.733	0.584
hsa04110 Cell cycle	0.318806	10	1.19	Q9UQE7	977	0.44	Down	1.2541e-06	K	Structural maintenance of chromosomes protein 3 OS=Homo sapiens OX=9606 GN=SMC3 PE=1 SV=2	SMC3	0.99997	0.0237068	46.88	KLEQCNTELK(1)K	3	1.6771	1	1.475	1.481	1.565	0.661	0.655	0.674
hsa04110 Cell cycle	0.318806	10	1.19	Q9UQE7	978	0.614	Down	0.00154246	K	Structural maintenance of chromosomes protein 3 OS=Homo sapiens OX=9606 GN=SMC3 PE=1 SV=2	SMC3	1	0.0367824	55.676	K(1)YSHVNK	3	-0.83081	1	1.268	1.23	1.418	0.871	0.742	0.791
hsa05144 Malaria	0.468959	1	1.84	P08581	1215	0.628	Down	0.00040379	K	Hepatocyte growth factor receptor OS=Homo sapiens OX=9606 GN=MET PE=1 SV=4	MET	1	0.00254286	66.267	NCMLDEK(1)FTVK	3	0.751	1	1.339	1.257	1.279	0.794	0.872	0.766
hsa01522 Endocrine resistance	0.801541	2	0.74	P63092	8	0.162	Down	1.3942e-07	K	Guanine nucleotide-binding protein G(s) subunit alpha isoforms short OS=Homo sapiens OX=9606 GN=GNAS PE=1 SV=1	GNAS	1	0.00017262	97.463	GCLGNSK(1)TEDQR	2	-0.98053	1	2.08	2.045	1.911	0.324	0.323	0.33
hsa01522 Endocrine resistance	0.801541	2	0.74	P06400	65	0.464	Down	0.002224	K	Retinoblastoma-associated protein OS=Homo sapiens OX=9606 GN=RB1 PE=1 SV=2	RB1	1	0.00150538	94.114	LK(1)IPDHVR	3	-0.34904	1	1.381	1.521	1.526	0.796	0.554	0.706
hsa04062 Chemokine signaling pathway	0.763251	4	0.82	Q04206	122	0.545	Down	0.0071434	K	Transcription factor p65 OS=Homo sapiens OX=9606 GN=RELA PE=1 SV=2	RELA	1	3.64055e-22	149.32	CIHSFQNLGIQCVK(1)K	3	0.47742	1	1.382	1.379	1.378	0.794	0.785	0.676
hsa04062 Chemokine signaling pathway	0.763251	4	0.82	Q04206	195	0.657	Down	4.2829e-05	K	Transcription factor p65 OS=Homo sapiens OX=9606 GN=RELA PE=1 SV=2	RELA	1	0.00217284	81.48	APNTAELK(1)ICR	2	-0.29332	1	1.29	1.233	1.264	0.806	0.824	0.857
hsa04062 Chemokine signaling pathway	0.763251	4	0.82	P42224	152	0.61	Down	0.00037983	K	Signal transducer and activator of transcription 1-alpha/beta OS=Homo sapiens OX=9606 GN=STAT1 PE=1 SV=2	STAT1	1	0.00351683	63.091	DK(1)VMCIEHEIK	3	-0.25958	1	1.219	1.385	1.319	0.803	0.829	0.762
hsa04062 Chemokine signaling pathway	0.763251	4	0.82	P60953	153	0.577	Down	0.000137319	K	Cell division control protein 42 homolog OS=Homo sapiens OX=9606 GN=CDC42 PE=1 SV=2	CDC42	1	2.59121e-13	142.45	AVK(1)YVECSALTQK	2	-0.94283	2	1.369	1.297	1.364	0.804	0.724	0.799
hsa04062 Chemokine signaling pathway	0.763251	4	0.82	P61586	104	0.588	Down	4.1025e-05	K	Transforming protein RhoA OS=Homo sapiens OX=9606 GN=RHOA PE=1 SV=1	RHOA	1	5.97999e-08	100.02	WTPEVK(1)HFCPNVPIILVGNK	4	0.21964	2	1.315	1.323	1.356	0.779	0.749	0.819
hsa04150 mTOR signaling pathway	0.267626	8	1.28	P55735	192	0.494	Down	1.69329e-05	K	Protein SEC13 homolog OS=Homo sapiens OX=9606 GN=SEC13 PE=1 SV=3	SEC13	1	0.000354026	70.889	FASGGCDNLIK(1)LWK	3	-1.05	1	1.463	1.414	1.438	0.682	0.745	0.705
hsa04150 mTOR signaling pathway	0.267626	8	1.28	P17252	575	0.62	Down	0.0034987	K	Protein kinase C alpha type OS=Homo sapiens OX=9606 GN=PRKCA PE=1 SV=4	PRKCA	1	0.00296928	74.92	GLMTK(1)HPAK	3	-0.94664	1	1.458	1.172	1.271	0.802	0.869	0.748
hsa04150 mTOR signaling pathway	0.267626	8	1.28	P21281	109	0.48	Down	5.5611e-07	K	V-type proton ATPase subunit B, brain isoform OS=Homo sapiens OX=9606 GN=ATP6V1B2 PE=1 SV=3	ATP6V1B2	1	0.000924525	87.718	K(1)TSCEFTGDILR	3	-0.37516	3	1.482	1.45	1.439	0.716	0.687	0.694
hsa04150 mTOR signaling pathway	0.267626	8	1.28	P21281	108	0.532	Down	0.0050152	K	V-type proton ATPase subunit B, brain isoform OS=Homo sapiens OX=9606 GN=ATP6V1B2 PE=1 SV=3	ATP6V1B2	1	1.83584e-08	108.14	AVVQVFEGTSGIDAK(1)K	3	0.31694	1	1.399	1.378	1.407	0.809	0.702	0.715
hsa04150 mTOR signaling pathway	0.267626	8	1.28	P30622	1026	0.632	Down	0.00115826	K	CAP-Gly domain-containing linker protein 1 OS=Homo sapiens OX=9606 GN=CLIP1 PE=1 SV=2	CLIP1	1	0.000529797	66.059	METSHNQCQELK(1)AR	3	-0.9546	1	1.372	1.211	1.279	0.787	0.883	0.772
hsa04150 mTOR signaling pathway	0.267626	8	1.28	P38606	132	0.405	Down	1.77762e-05	K	V-type proton ATPase catalytic subunit A OS=Homo sapiens OX=9606 GN=ATP6V1A PE=1 SV=2	ATP6V1A	1	0.000353207	107.09	DIK(1)WDFTPCK	2	-0.13164	2	1.639	1.537	1.502	0.652	0.641	0.6
hsa04150 mTOR signaling pathway	0.267626	8	1.28	P36543	138	0.569	Down	2.1349e-05	K	V-type proton ATPase subunit E 1 OS=Homo sapiens OX=9606 GN=ATP6V1E1 PE=1 SV=1	ATP6V1E1	1	0.01156	85.355	K(1)QDFPLVK	3	0.41354	2	1.333	1.367	1.353	0.748	0.806	0.753
hsa04150 mTOR signaling pathway	0.267626	8	1.28	Q6A1A2	277	0.634	Down	0.006397	K	Putative 3-phosphoinositide-dependent protein kinase 2 OS=Homo sapiens OX=9606 GN=PDPK2P PE=5 SV=1	PDPK2P	1	0.00344264	56.205	LEYDFPEK(1)FFPK	3	1.5294	1	1.1	1.286	1.462	0.823	0.773	0.842
hsa04150 mTOR signaling pathway	0.267626	8	1.28	P61586	104	0.588	Down	4.1025e-05	K	Transforming protein RhoA OS=Homo sapiens OX=9606 GN=RHOA PE=1 SV=1	RHOA	1	5.97999e-08	100.02	WTPEVK(1)HFCPNVPIILVGNK	4	0.21964	2	1.315	1.323	1.356	0.779	0.749	0.819
hsa04115 p53 signaling pathway	0.515841	2	1.23	P36952	189	0.65	Down	0.00030077	K	Serpin B5 OS=Homo sapiens OX=9606 GN=SERPINB5 PE=1 SV=2	SERPINB5	1	0.0232251	84.083	VNK(1)TDTK	2	-1.5427	1	1.253	1.296	1.26	0.877	0.776	0.821
hsa04115 p53 signaling pathway	0.515841	2	1.23	O14757	53	0.504	Down	2.4938e-05	K	Serine/threonine-protein kinase Chk1 OS=Homo sapiens OX=9606 GN=CHEK1 PE=1 SV=2	CHEK1	1	0.000367894	107.06	AVDCPENIK(1)K	2	-0.18789	1	1.351	1.44	1.483	0.713	0.7	0.742
hsa05218 Melanoma	0.515841	2	1.23	P06400	65	0.464	Down	0.002224	K	Retinoblastoma-associated protein OS=Homo sapiens OX=9606 GN=RB1 PE=1 SV=2	RB1	1	0.00150538	94.114	LK(1)IPDHVR	3	-0.34904	1	1.381	1.521	1.526	0.796	0.554	0.706
hsa05218 Melanoma	0.515841	2	1.23	P08581	1215	0.628	Down	0.00040379	K	Hepatocyte growth factor receptor OS=Homo sapiens OX=9606 GN=MET PE=1 SV=4	MET	1	0.00254286	66.267	NCMLDEK(1)FTVK	3	0.751	1	1.339	1.257	1.279	0.794	0.872	0.766
hsa03015 mRNA surveillance pathway	0.402759	10	1.12	Q6UN15	191	0.631	Down	0.000100821	K	Pre-mRNA 3'-end-processing factor FIP1 OS=Homo sapiens OX=9606 GN=FIP1L1 PE=1 SV=1	FIP1L1	1	0.00735885	103.74	AYCEK(1)QK	2	-1.3252	1	1.322	1.292	1.253	0.852	0.806	0.781
hsa03015 mRNA surveillance pathway	0.402759	10	1.12	P67775	29	0.542	Down	0.0023993	K	Serine/threonine-protein phosphatase 2A catalytic subunit alpha isoform OS=Homo sapiens OX=9606 GN=PPP2CA PE=1 SV=1	PPP2CA	1	1.14086e-10	122.97	QLSESQVK(1)SLCEK	3	0.11263	1	1.225	1.535	1.379	0.801	0.66	0.784
hsa03015 mRNA surveillance pathway	0.402759	10	1.12	Q13838	162	0.422	Down	1.92273e-05	K	Spliceosome RNA helicase DDX39B OS=Homo sapiens OX=9606 GN=DDX39B PE=1 SV=1	DDX39B	1	0.0197688	89.827	KDEEVLK(1)K	2	-0.64126	3	1.559	1.602	1.441	0.667	0.628	0.647
hsa03015 mRNA surveillance pathway	0.402759	10	1.12	Q13838	241	0.44	Down	8.2451e-07	K	Spliceosome RNA helicase DDX39B OS=Homo sapiens OX=9606 GN=DDX39B PE=1 SV=1	DDX39B	1	2.52188e-06	104.2	K(1)FMQDPMEIFVDDETK	3	0.192	1	1.517	1.49	1.519	0.687	0.659	0.647
hsa03015 mRNA surveillance pathway	0.402759	10	1.12	P62136	41	0.561	Down	0.000119643	K	Serine/threonine-protein phosphatase PP1-alpha catalytic subunit OS=Homo sapiens OX=9606 GN=PPP1CA PE=1 SV=1	PPP1CA	1	0.0182236	88.954	GLCLK(1)SR	2	0.99693	1	1.421	1.279	1.382	0.769	0.732	0.791
hsa03015 mRNA surveillance pathway	0.402759	10	1.12	Q92797	684	0.342	Down	3.7122e-05	K	Symplekin OS=Homo sapiens OX=9606 GN=SYMPK PE=1 SV=2	SYMPK	1	0.0226227	76.282	K(1)YCEDESR	2	0.04773	1	1.777	1.569	1.621	0.525	0.593	0.579
hsa03015 mRNA surveillance pathway	0.402759	10	1.12	Q96EP5	59	0.357	Down	1.1444e-06	K	DAZ-associated protein 1 OS=Homo sapiens OX=9606 GN=DAZAP1 PE=1 SV=1	DAZAP1	1	7.66327e-14	142.4	FK(1)DPNCVGTVLASR	3	0.0026175	2	1.633	1.699	1.557	0.585	0.584	0.577
hsa03015 mRNA surveillance pathway	0.402759	10	1.12	Q14738	121	0.585	Down	1.5816e-07	K	Serine/threonine-protein phosphatase 2A 56 kDa regulatory subunit delta isoform OS=Homo sapiens OX=9606 GN=PPP2R5D PE=1 SV=1	PPP2R5D	1	0.00140172	94.692	EELFIQK(1)LR	2	0.12183	1	1.336	1.341	1.325	0.77	0.784	0.789
hsa03015 mRNA surveillance pathway	0.402759	10	1.12	Q92900	378	0.213	Down	3.1039e-06	K	Regulator of nonsense transcripts 1 OS=Homo sapiens OX=9606 GN=UPF1 PE=1 SV=2	UPF1	1	0.000607611	91.961	YK(1)GDLAPLWK	2	-0.82536	3	1.986	1.884	1.816	0.381	0.438	0.394
hsa03015 mRNA surveillance pathway	0.402759	10	1.12	P15170	238	0.64	Down	0.00049716	K	Eukaryotic peptide chain release factor GTP-binding subunit ERF3A OS=Homo sapiens OX=9606 GN=GSPT1 PE=1 SV=1	GSPT1	1	0.0233636	83.948	YEECK(1)EK	2	0.36512	1	1.243	1.305	1.29	0.853	0.849	0.753
hsa03015 mRNA surveillance pathway	0.402759	10	1.12	Q8IYB3	36	0.566	Down	5.9421e-05	K	Serine/arginine repetitive matrix protein 1 OS=Homo sapiens OX=9606 GN=SRRM1 PE=1 SV=2	SRRM1	1	0.0047947	99.815	FAECLEK(1)K	2	-0.89521	1	1.345	1.384	1.334	0.721	0.791	0.787
hsa00052 Galactose metabolism	0.673145	3	0.92	P15121	90	0.566	Down	0.000176128	K	Aldo-keto reductase family 1 member B1 OS=Homo sapiens OX=9606 GN=AKR1B1 PE=1 SV=3	AKR1B1	1	0.000416412	126.07	GLVK(1)GACQK	2	-0.5039	1	1.361	1.419	1.285	0.753	0.734	0.813
hsa00052 Galactose metabolism	0.673145	3	0.92	P15121	95	0.645	Down	6.451e-05	K	Aldo-keto reductase family 1 member B1 OS=Homo sapiens OX=9606 GN=AKR1B1 PE=1 SV=3	AKR1B1	1	6.67229e-06	122.46	GACQK(1)TLSDLK	2	-1.0993	1	1.273	1.303	1.245	0.809	0.797	0.857
hsa00052 Galactose metabolism	0.673145	3	0.92	P15121	86	0.625	Down	4.0659e-05	K	Aldo-keto reductase family 1 member B1 OS=Homo sapiens OX=9606 GN=AKR1B1 PE=1 SV=3	AKR1B1	1	7.49529e-06	105.65	LWCTYHEK(1)GLVK	3	0.043897	2	1.301	1.284	1.296	0.831	0.825	0.771
hsa00052 Galactose metabolism	0.673145	3	0.92	Q14376	176	0.596	Down	0.0041432	K	UDP-glucose 4-epimerase OS=Homo sapiens OX=9606 GN=GALE PE=1 SV=2	GALE	1	0.000222453	80.387	DLCQADK(1)TWNAVLLR	3	-0.17253	1	1.218	1.39	1.353	0.696	0.909	0.757
hsa00052 Galactose metabolism	0.673145	3	0.92	Q16851	127	0.404	Down	3.639e-05	K	UTP--glucose-1-phosphate uridylyltransferase OS=Homo sapiens OX=9606 GN=UGP2 PE=1 SV=5	UGP2	1	0.0249755	64.906	GPK(1)SLIGVR	2	-0.065317	1	1.654	1.554	1.473	0.636	0.597	0.658
hsa04270 Vascular smooth muscle contraction	0.203259	5	1.54	P62136	41	0.561	Down	0.000119643	K	Serine/threonine-protein phosphatase PP1-alpha catalytic subunit OS=Homo sapiens OX=9606 GN=PPP1CA PE=1 SV=1	PPP1CA	1	0.0182236	88.954	GLCLK(1)SR	2	0.99693	1	1.421	1.279	1.382	0.769	0.732	0.791
hsa04270 Vascular smooth muscle contraction	0.203259	5	1.54	P63092	8	0.162	Down	1.3942e-07	K	Guanine nucleotide-binding protein G(s) subunit alpha isoforms short OS=Homo sapiens OX=9606 GN=GNAS PE=1 SV=1	GNAS	1	0.00017262	97.463	GCLGNSK(1)TEDQR	2	-0.98053	1	2.08	2.045	1.911	0.324	0.323	0.33
hsa04270 Vascular smooth muscle contraction	0.203259	5	1.54	P17252	575	0.62	Down	0.0034987	K	Protein kinase C alpha type OS=Homo sapiens OX=9606 GN=PRKCA PE=1 SV=4	PRKCA	1	0.00296928	74.92	GLMTK(1)HPAK	3	-0.94664	1	1.458	1.172	1.271	0.802	0.869	0.748
hsa04270 Vascular smooth muscle contraction	0.203259	5	1.54	Q14573	258	0.471	Down	3.6728e-06	K	Inositol 1,4,5-trisphosphate receptor type 3 OS=Homo sapiens OX=9606 GN=ITPR3 PE=1 SV=2	ITPR3	1	0.000333363	105.13	FLTCDEYK(1)GK	2	-1.2035	2	1.529	1.425	1.454	0.707	0.674	0.693
hsa04270 Vascular smooth muscle contraction	0.203259	5	1.54	P61586	104	0.588	Down	4.1025e-05	K	Transforming protein RhoA OS=Homo sapiens OX=9606 GN=RHOA PE=1 SV=1	RHOA	1	5.97999e-08	100.02	WTPEVK(1)HFCPNVPIILVGNK	4	0.21964	2	1.315	1.323	1.356	0.779	0.749	0.819
hsa01521 EGFR tyrosine kinase inhibitor resistance	0.844284	2	0.67	P17252	575	0.62	Down	0.0034987	K	Protein kinase C alpha type OS=Homo sapiens OX=9606 GN=PRKCA PE=1 SV=4	PRKCA	1	0.00296928	74.92	GLMTK(1)HPAK	3	-0.94664	1	1.458	1.172	1.271	0.802	0.869	0.748
hsa01521 EGFR tyrosine kinase inhibitor resistance	0.844284	2	0.67	P08581	1215	0.628	Down	0.00040379	K	Hepatocyte growth factor receptor OS=Homo sapiens OX=9606 GN=MET PE=1 SV=4	MET	1	0.00254286	66.267	NCMLDEK(1)FTVK	3	0.751	1	1.339	1.257	1.279	0.794	0.872	0.766
hsa05203 Viral carcinogenesis	0.745041	13	0.89	Q09472	1590	0.62	Down	0.00020271	K	Histone acetyltransferase p300 OS=Homo sapiens OX=9606 GN=EP300 PE=1 SV=2	EP300	1	0.00029002	91.867	LYATMEK(1)HK	3	-0.76884	4	1.377	1.286	1.238	0.838	0.789	0.79
hsa05203 Viral carcinogenesis	0.745041	13	0.89	Q14160	19	0.607	Down	0.0050796	K	Protein scribble homolog OS=Homo sapiens OX=9606 GN=SCRIB PE=1 SV=4	SCRIB	1	0.0242747	56.258	HVESVDK(1)R	3	1.6165	1	1.369	1.34	1.22	0.675	0.813	0.897
hsa05203 Viral carcinogenesis	0.745041	13	0.89	P23497	306	0.61	Down	0.000123111	K	Nuclear autoantigen Sp-100 OS=Homo sapiens OX=9606 GN=SP100 PE=1 SV=3	SP100	0.999976	0.000156458	85.176	EKPFSNSK(1)VECQAQAR	3	-0.25067	1	1.369	1.23	1.33	0.801	0.783	0.812
hsa05203 Viral carcinogenesis	0.745041	13	0.89	P60953	153	0.577	Down	0.000137319	K	Cell division control protein 42 homolog OS=Homo sapiens OX=9606 GN=CDC42 PE=1 SV=2	CDC42	1	2.59121e-13	142.45	AVK(1)YVECSALTQK	2	-0.94283	2	1.369	1.297	1.364	0.804	0.724	0.799
hsa05203 Viral carcinogenesis	0.745041	13	0.89	P06400	65	0.464	Down	0.002224	K	Retinoblastoma-associated protein OS=Homo sapiens OX=9606 GN=RB1 PE=1 SV=2	RB1	1	0.00150538	94.114	LK(1)IPDHVR	3	-0.34904	1	1.381	1.521	1.526	0.796	0.554	0.706
hsa05203 Viral carcinogenesis	0.745041	13	0.89	Q9Y277	61	0.61	Down	6.2345e-05	K	Voltage-dependent anion-selective channel protein 3 OS=Homo sapiens OX=9606 GN=VDAC3 PE=1 SV=1	VDAC3	1	2.31395e-05	127.17	ASGNLETK(1)YK	3	-1.1902	4	1.36	1.318	1.248	0.78	0.817	0.798
hsa05203 Viral carcinogenesis	0.745041	13	0.89	P43487	154	0.361	Down	2.7355e-06	K	Ran-specific GTPase-activating protein OS=Homo sapiens OX=9606 GN=RANBP1 PE=1 SV=1	RANBP1	1	0.0233636	83.948	TK(1)FEECR	2	-0.64741	1	1.725	1.586	1.563	0.591	0.591	0.579
hsa05203 Viral carcinogenesis	0.745041	13	0.89	Q04206	122	0.545	Down	0.0071434	K	Transcription factor p65 OS=Homo sapiens OX=9606 GN=RELA PE=1 SV=2	RELA	1	3.64055e-22	149.32	CIHSFQNLGIQCVK(1)K	3	0.47742	1	1.382	1.379	1.378	0.794	0.785	0.676
hsa05203 Viral carcinogenesis	0.745041	13	0.89	Q04206	195	0.657	Down	4.2829e-05	K	Transcription factor p65 OS=Homo sapiens OX=9606 GN=RELA PE=1 SV=2	RELA	1	0.00217284	81.48	APNTAELK(1)ICR	2	-0.29332	1	1.29	1.233	1.264	0.806	0.824	0.857
hsa05203 Viral carcinogenesis	0.745041	13	0.89	Q99525	6	0.281	Down	3.7489e-07	K	Histone H4-like protein type G OS=Homo sapiens OX=9606 GN=HIST1H4G PE=1 SV=1	HIST1H4G	1	1.63111e-05	105.19	GK(1)AGK(1)GLGK(1)GGAK	2	-0.36748	2	1.814	1.733	1.733	0.489	0.483	0.513
hsa05203 Viral carcinogenesis	0.745041	13	0.89	Q99525	13	0.608	Down	9.8826e-05	K	Histone H4-like protein type G OS=Homo sapiens OX=9606 GN=HIST1H4G PE=1 SV=1	HIST1H4G	1	1.63111e-05	105.19	GLGK(1)GGAK(1)CHR	3	1.0158	10	1.343	1.325	1.266	0.821	0.756	0.815
hsa05203 Viral carcinogenesis	0.745041	13	0.89	Q99525	9	0.281	Down	3.7489e-07	K	Histone H4-like protein type G OS=Homo sapiens OX=9606 GN=HIST1H4G PE=1 SV=1	HIST1H4G	1	1.63111e-05	105.19	GK(1)AGK(1)GLGK(1)GGAK	2	-0.36748	2	1.814	1.733	1.733	0.489	0.483	0.513
hsa05203 Viral carcinogenesis	0.745041	13	0.89	O14757	53	0.504	Down	2.4938e-05	K	Serine/threonine-protein kinase Chk1 OS=Homo sapiens OX=9606 GN=CHEK1 PE=1 SV=2	CHEK1	1	0.000367894	107.06	AVDCPENIK(1)K	2	-0.18789	1	1.351	1.44	1.483	0.713	0.7	0.742
hsa05203 Viral carcinogenesis	0.745041	13	0.89	Q13547	412	0.47	Down	0.0032599	K	Histone deacetylase 1 OS=Homo sapiens OX=9606 GN=HDAC1 PE=1 SV=1	HDAC1	1	0.00172616	93.096	ISICSSDK(1)R	2	-1.0844	1	1.453	1.472	1.484	0.747	0.681	0.645
hsa05203 Viral carcinogenesis	0.745041	13	0.89	P14618	162	0.464	Down	0.00025908	K	Pyruvate kinase PKM OS=Homo sapiens OX=9606 GN=PKM PE=1 SV=4	PKM	1	6.49953e-05	90.725	CDENILWLDYK(1)NICK	3	-0.11353	1	1.459	1.39	1.578	0.656	0.756	0.643
hsa05203 Viral carcinogenesis	0.745041	13	0.89	P14618	322	0.414	Down	1.32e-06	K	Pyruvate kinase PKM OS=Homo sapiens OX=9606 GN=PKM PE=1 SV=4	PKM	1	4.11221e-09	110.12	AGK(1)PVICATQMLESMIK	3	0.3365	2	1.583	1.521	1.528	0.626	0.629	0.664
hsa05203 Viral carcinogenesis	0.745041	13	0.89	P61586	104	0.588	Down	4.1025e-05	K	Transforming protein RhoA OS=Homo sapiens OX=9606 GN=RHOA PE=1 SV=1	RHOA	1	5.97999e-08	100.02	WTPEVK(1)HFCPNVPIILVGNK	4	0.21964	2	1.315	1.323	1.356	0.779	0.749	0.819
hsa04742 Taste transduction	0.468959	1	1.84	Q14573	258	0.471	Down	3.6728e-06	K	Inositol 1,4,5-trisphosphate receptor type 3 OS=Homo sapiens OX=9606 GN=ITPR3 PE=1 SV=2	ITPR3	1	0.000333363	105.13	FLTCDEYK(1)GK	2	-1.2035	2	1.529	1.425	1.454	0.707	0.674	0.693
hsa04621 NOD-like receptor signaling pathway	0.142347	9	1.44	P45880	72	0.622	Down	2.3124e-06	K	Voltage-dependent anion-selective channel protein 2 OS=Homo sapiens OX=9606 GN=VDAC2 PE=1 SV=2	VDAC2	1	0.000246964	111.63	VTGTLETK(1)YK	2	0.39095	2	1.319	1.297	1.275	0.822	0.794	0.804
hsa04621 NOD-like receptor signaling pathway	0.142347	9	1.44	P45880	45	0.523	Down	5.6922e-05	K	Voltage-dependent anion-selective channel protein 2 OS=Homo sapiens OX=9606 GN=VDAC2 PE=1 SV=2	VDAC2	1	1.52592e-30	152.64	TK(1)SCSGVEFSTSGSSNTDTGK	3	-0.27456	1	1.446	1.328	1.439	0.757	0.745	0.703
hsa04621 NOD-like receptor signaling pathway	0.142347	9	1.44	Q9Y277	61	0.61	Down	6.2345e-05	K	Voltage-dependent anion-selective channel protein 3 OS=Homo sapiens OX=9606 GN=VDAC3 PE=1 SV=1	VDAC3	1	2.31395e-05	127.17	ASGNLETK(1)YK	3	-1.1902	4	1.36	1.318	1.248	0.78	0.817	0.798
hsa04621 NOD-like receptor signaling pathway	0.142347	9	1.44	Q04206	122	0.545	Down	0.0071434	K	Transcription factor p65 OS=Homo sapiens OX=9606 GN=RELA PE=1 SV=2	RELA	1	3.64055e-22	149.32	CIHSFQNLGIQCVK(1)K	3	0.47742	1	1.382	1.379	1.378	0.794	0.785	0.676
hsa04621 NOD-like receptor signaling pathway	0.142347	9	1.44	Q04206	195	0.657	Down	4.2829e-05	K	Transcription factor p65 OS=Homo sapiens OX=9606 GN=RELA PE=1 SV=2	RELA	1	0.00217284	81.48	APNTAELK(1)ICR	2	-0.29332	1	1.29	1.233	1.264	0.806	0.824	0.857
hsa04621 NOD-like receptor signaling pathway	0.142347	9	1.44	P42224	152	0.61	Down	0.00037983	K	Signal transducer and activator of transcription 1-alpha/beta OS=Homo sapiens OX=9606 GN=STAT1 PE=1 SV=2	STAT1	1	0.00351683	63.091	DK(1)VMCIEHEIK	3	-0.25958	1	1.219	1.385	1.319	0.803	0.829	0.762
hsa04621 NOD-like receptor signaling pathway	0.142347	9	1.44	P08238	559	0.479	Down	1.56421e-05	K	Heat shock protein HSP 90-beta OS=Homo sapiens OX=9606 GN=HSP90AB1 PE=1 SV=4	HSP90AB1	1	0.00072324	111.17	AK(1)FENLCK	3	-0.027707	2	1.508	1.469	1.398	0.714	0.677	0.704
hsa04621 NOD-like receptor signaling pathway	0.142347	9	1.44	P08238	568	0.153	Down	1.0451e-06	K	Heat shock protein HSP 90-beta OS=Homo sapiens OX=9606 GN=HSP90AB1 PE=1 SV=4	HSP90AB1	1	0.0129056	82.417	LMK(1)EILDK	2	-0.52759	1	2.117	2.005	1.986	0.335	0.306	0.291
hsa04621 NOD-like receptor signaling pathway	0.142347	9	1.44	P08238	557	0.623	Down	1.2245e-06	K	Heat shock protein HSP 90-beta OS=Homo sapiens OX=9606 GN=HSP90AB1 PE=1 SV=4	HSP90AB1	1	0.0285507	80.219	MEESK(1)AK	2	0.84477	2	1.31	1.303	1.275	0.801	0.799	0.821
hsa04621 NOD-like receptor signaling pathway	0.142347	9	1.44	Q58FF8	332	0.479	Down	1.56421e-05	K	Putative heat shock protein HSP 90-beta 2 OS=Homo sapiens OX=9606 GN=HSP90AB2P PE=1 SV=2	HSP90AB2P	1	0.00072324	111.17	AK(1)FENLCK	3	-0.027707	2	1.508	1.469	1.398	0.714	0.677	0.704
hsa04621 NOD-like receptor signaling pathway	0.142347	9	1.44	P07900	567	0.531	Down	2.4582e-05	K	Heat shock protein HSP 90-alpha OS=Homo sapiens OX=9606 GN=HSP90AA1 PE=1 SV=5	HSP90AA1	1	0.000535464	107.01	TK(1)FENLCK	3	0.23519	3	1.473	1.347	1.365	0.728	0.755	0.74
hsa04621 NOD-like receptor signaling pathway	0.142347	9	1.44	P07900	576	0.235	Down	5.6281e-07	K	Heat shock protein HSP 90-alpha OS=Homo sapiens OX=9606 GN=HSP90AA1 PE=1 SV=5	HSP90AA1	1	0.00316475	93.096	IMK(1)DILEK	3	0.51489	4	1.881	1.876	1.791	0.418	0.456	0.43
hsa04621 NOD-like receptor signaling pathway	0.142347	9	1.44	Q14573	258	0.471	Down	3.6728e-06	K	Inositol 1,4,5-trisphosphate receptor type 3 OS=Homo sapiens OX=9606 GN=ITPR3 PE=1 SV=2	ITPR3	1	0.000333363	105.13	FLTCDEYK(1)GK	2	-1.2035	2	1.529	1.425	1.454	0.707	0.674	0.693
hsa04621 NOD-like receptor signaling pathway	0.142347	9	1.44	P61586	104	0.588	Down	4.1025e-05	K	Transforming protein RhoA OS=Homo sapiens OX=9606 GN=RHOA PE=1 SV=1	RHOA	1	5.97999e-08	100.02	WTPEVK(1)HFCPNVPIILVGNK	4	0.21964	2	1.315	1.323	1.356	0.779	0.749	0.819
hsa04211 Longevity regulating pathway	0.921088	1	0.46	Q04206	122	0.545	Down	0.0071434	K	Transcription factor p65 OS=Homo sapiens OX=9606 GN=RELA PE=1 SV=2	RELA	1	3.64055e-22	149.32	CIHSFQNLGIQCVK(1)K	3	0.47742	1	1.382	1.379	1.378	0.794	0.785	0.676
hsa04211 Longevity regulating pathway	0.921088	1	0.46	Q04206	195	0.657	Down	4.2829e-05	K	Transcription factor p65 OS=Homo sapiens OX=9606 GN=RELA PE=1 SV=2	RELA	1	0.00217284	81.48	APNTAELK(1)ICR	2	-0.29332	1	1.29	1.233	1.264	0.806	0.824	0.857
hsa00051 Fructose and mannose metabolism	0.274865	4	1.48	P15121	90	0.566	Down	0.000176128	K	Aldo-keto reductase family 1 member B1 OS=Homo sapiens OX=9606 GN=AKR1B1 PE=1 SV=3	AKR1B1	1	0.000416412	126.07	GLVK(1)GACQK	2	-0.5039	1	1.361	1.419	1.285	0.753	0.734	0.813
hsa00051 Fructose and mannose metabolism	0.274865	4	1.48	P15121	95	0.645	Down	6.451e-05	K	Aldo-keto reductase family 1 member B1 OS=Homo sapiens OX=9606 GN=AKR1B1 PE=1 SV=3	AKR1B1	1	6.67229e-06	122.46	GACQK(1)TLSDLK	2	-1.0993	1	1.273	1.303	1.245	0.809	0.797	0.857
hsa00051 Fructose and mannose metabolism	0.274865	4	1.48	P15121	86	0.625	Down	4.0659e-05	K	Aldo-keto reductase family 1 member B1 OS=Homo sapiens OX=9606 GN=AKR1B1 PE=1 SV=3	AKR1B1	1	7.49529e-06	105.65	LWCTYHEK(1)GLVK	3	0.043897	2	1.301	1.284	1.296	0.831	0.825	0.771
hsa00051 Fructose and mannose metabolism	0.274865	4	1.48	P04075	140	0.462	Down	0.00189588	K	Fructose-bisphosphate aldolase A OS=Homo sapiens OX=9606 GN=ALDOA PE=1 SV=2	ALDOA	1	0.0246193	73.499	K(1)DGADFAK	3	0.18494	2	1.579	1.444	1.418	0.69	0.684	0.679
hsa00051 Fructose and mannose metabolism	0.274865	4	1.48	Q00796	134	0.52	Down	1.70532e-05	K	Sorbitol dehydrogenase OS=Homo sapiens OX=9606 GN=SORD PE=1 SV=4	SORD	1	0.00022051	90.05	FYK(1)HNAAFCYK	3	-0.36253	2	1.368	1.43	1.42	0.7	0.746	0.748
hsa00051 Fructose and mannose metabolism	0.274865	4	1.48	O60547	21	0.55	Down	0.000177801	K	GDP-mannose 4,6 dehydratase OS=Homo sapiens OX=9606 GN=GMDS PE=1 SV=1	GMDS	1	0.00248417	76.332	GSGDGEMGK(1)PR	2	0.14873	1	1.31	1.401	1.401	0.697	0.779	0.785
hsa00051 Fructose and mannose metabolism	0.274865	4	1.48	O60547	338	0.381	Down	7.3982e-08	K	GDP-mannose 4,6 dehydratase OS=Homo sapiens OX=9606 GN=GMDS PE=1 SV=1	GMDS	1	8.18842e-10	116.13	YYRPTEVDFLQGDCTK(1)AK	3	-1.1008	1	1.629	1.579	1.575	0.613	0.602	0.605
hsa05226 Gastric cancer	0.609198	3	1.01	P06400	65	0.464	Down	0.002224	K	Retinoblastoma-associated protein OS=Homo sapiens OX=9606 GN=RB1 PE=1 SV=2	RB1	1	0.00150538	94.114	LK(1)IPDHVR	3	-0.34904	1	1.381	1.521	1.526	0.796	0.554	0.706
hsa05226 Gastric cancer	0.609198	3	1.01	P35221	120	0.488	Down	0.000182432	K	Catenin alpha-1 OS=Homo sapiens OX=9606 GN=CTNNA1 PE=1 SV=1	CTNNA1	1	5.50199e-08	107.82	AAAGEFADDPCSSVK(1)R	2	-0.12176	1	1.365	1.42	1.547	0.7	0.659	0.755
hsa05226 Gastric cancer	0.609198	3	1.01	P08581	1215	0.628	Down	0.00040379	K	Hepatocyte growth factor receptor OS=Homo sapiens OX=9606 GN=MET PE=1 SV=4	MET	1	0.00254286	66.267	NCMLDEK(1)FTVK	3	0.751	1	1.339	1.257	1.279	0.794	0.872	0.766
hsa05206 MicroRNAs in cancer	0.313377	8	1.23	Q09472	1590	0.62	Down	0.00020271	K	Histone acetyltransferase p300 OS=Homo sapiens OX=9606 GN=EP300 PE=1 SV=2	EP300	1	0.00029002	91.867	LYATMEK(1)HK	3	-0.76884	4	1.377	1.286	1.238	0.838	0.789	0.79
hsa05206 MicroRNAs in cancer	0.313377	8	1.23	P26358	1004	0.462	Down	1.97721e-05	K	DNA (cytosine-5)-methyltransferase 1 OS=Homo sapiens OX=9606 GN=DNMT1 PE=1 SV=2	DNMT1	1	0.00280758	68.972	K(1)SNGRPNETDIK	3	-1.3658	1	1.492	1.447	1.501	0.685	0.719	0.646
hsa05206 MicroRNAs in cancer	0.313377	8	1.23	P17252	575	0.62	Down	0.0034987	K	Protein kinase C alpha type OS=Homo sapiens OX=9606 GN=PRKCA PE=1 SV=4	PRKCA	1	0.00296928	74.92	GLMTK(1)HPAK	3	-0.94664	1	1.458	1.172	1.271	0.802	0.869	0.748
hsa05206 MicroRNAs in cancer	0.313377	8	1.23	P36952	189	0.65	Down	0.00030077	K	Serpin B5 OS=Homo sapiens OX=9606 GN=SERPINB5 PE=1 SV=2	SERPINB5	1	0.0232251	84.083	VNK(1)TDTK	2	-1.5427	1	1.253	1.296	1.26	0.877	0.776	0.821
hsa05206 MicroRNAs in cancer	0.313377	8	1.23	P63279	49	0.356	Down	3.7389e-05	K	SUMO-conjugating enzyme UBC9 OS=Homo sapiens OX=9606 GN=UBE2I PE=1 SV=1	UBE2I	1	0.00141737	86.699	K(1)GTPWEGGLFK	3	0.37048	2	1.601	1.604	1.683	0.538	0.568	0.634
hsa05206 MicroRNAs in cancer	0.313377	8	1.23	Q13547	412	0.47	Down	0.0032599	K	Histone deacetylase 1 OS=Homo sapiens OX=9606 GN=HDAC1 PE=1 SV=1	HDAC1	1	0.00172616	93.096	ISICSSDK(1)R	2	-1.0844	1	1.453	1.472	1.484	0.747	0.681	0.645
hsa05206 MicroRNAs in cancer	0.313377	8	1.23	P61586	104	0.588	Down	4.1025e-05	K	Transforming protein RhoA OS=Homo sapiens OX=9606 GN=RHOA PE=1 SV=1	RHOA	1	5.97999e-08	100.02	WTPEVK(1)HFCPNVPIILVGNK	4	0.21964	2	1.315	1.323	1.356	0.779	0.749	0.819
hsa05206 MicroRNAs in cancer	0.313377	8	1.23	P08581	1215	0.628	Down	0.00040379	K	Hepatocyte growth factor receptor OS=Homo sapiens OX=9606 GN=MET PE=1 SV=4	MET	1	0.00254286	66.267	NCMLDEK(1)FTVK	3	0.751	1	1.339	1.257	1.279	0.794	0.872	0.766
hsa04072 Phospholipase D signaling pathway	0.384667	5	1.23	P63092	8	0.162	Down	1.3942e-07	K	Guanine nucleotide-binding protein G(s) subunit alpha isoforms short OS=Homo sapiens OX=9606 GN=GNAS PE=1 SV=1	GNAS	1	0.00017262	97.463	GCLGNSK(1)TEDQR	2	-0.98053	1	2.08	2.045	1.911	0.324	0.323	0.33
hsa04072 Phospholipase D signaling pathway	0.384667	5	1.23	P17252	575	0.62	Down	0.0034987	K	Protein kinase C alpha type OS=Homo sapiens OX=9606 GN=PRKCA PE=1 SV=4	PRKCA	1	0.00296928	74.92	GLMTK(1)HPAK	3	-0.94664	1	1.458	1.172	1.271	0.802	0.869	0.748
hsa04072 Phospholipase D signaling pathway	0.384667	5	1.23	P50570	90	0.247	Down	2.2772e-05	K	Dynamin-2 OS=Homo sapiens OX=9606 GN=DNM2 PE=1 SV=2	DNM2	1	0.007979	78.342	K(1)FTDFDEVR	2	-0.55845	1	1.768	1.787	1.917	0.504	0.415	0.435
hsa04072 Phospholipase D signaling pathway	0.384667	5	1.23	Q06124	178	0.256	Down	1.83063e-05	K	Tyrosine-protein phosphatase non-receptor type 11 OS=Homo sapiens OX=9606 GN=PTPN11 PE=1 SV=2	PTPN11	1	0.00118893	79.346	CQELK(1)YDVGGGER	2	0.10773	2	1.739	1.852	1.824	0.421	0.505	0.46
hsa04072 Phospholipase D signaling pathway	0.384667	5	1.23	P61586	104	0.588	Down	4.1025e-05	K	Transforming protein RhoA OS=Homo sapiens OX=9606 GN=RHOA PE=1 SV=1	RHOA	1	5.97999e-08	100.02	WTPEVK(1)HFCPNVPIILVGNK	4	0.21964	2	1.315	1.323	1.356	0.779	0.749	0.819
hsa04668 TNF signaling pathway	0.844284	2	0.67	Q04206	122	0.545	Down	0.0071434	K	Transcription factor p65 OS=Homo sapiens OX=9606 GN=RELA PE=1 SV=2	RELA	1	3.64055e-22	149.32	CIHSFQNLGIQCVK(1)K	3	0.47742	1	1.382	1.379	1.378	0.794	0.785	0.676
hsa04668 TNF signaling pathway	0.844284	2	0.67	Q04206	195	0.657	Down	4.2829e-05	K	Transcription factor p65 OS=Homo sapiens OX=9606 GN=RELA PE=1 SV=2	RELA	1	0.00217284	81.48	APNTAELK(1)ICR	2	-0.29332	1	1.29	1.233	1.264	0.806	0.824	0.857
hsa04668 TNF signaling pathway	0.844284	2	0.67	Q8NB16	22	0.603	Down	6.1985e-05	K	Mixed lineage kinase domain-like protein OS=Homo sapiens OX=9606 GN=MLKL PE=1 SV=1	MLKL	1	0.0392606	66.692	CEEMK(1)YCK	2	-0.075724	1	1.369	1.256	1.326	0.814	0.794	0.774
hsa03420 Nucleotide excision repair	0.850823	1	0.61	P18858	282	0.507	Down	3.5094e-05	K	DNA ligase 1 OS=Homo sapiens OX=9606 GN=LIG1 PE=1 SV=1	LIG1	1	0.0001454	67.326	NNYHPVEDACWK(1)PGQK	3	-1.4027	1	1.469	1.375	1.424	0.714	0.758	0.694
hsa04722 Neurotrophin signaling pathway	0.301815	6	1.3	Q04206	122	0.545	Down	0.0071434	K	Transcription factor p65 OS=Homo sapiens OX=9606 GN=RELA PE=1 SV=2	RELA	1	3.64055e-22	149.32	CIHSFQNLGIQCVK(1)K	3	0.47742	1	1.382	1.379	1.378	0.794	0.785	0.676
hsa04722 Neurotrophin signaling pathway	0.301815	6	1.3	Q04206	195	0.657	Down	4.2829e-05	K	Transcription factor p65 OS=Homo sapiens OX=9606 GN=RELA PE=1 SV=2	RELA	1	0.00217284	81.48	APNTAELK(1)ICR	2	-0.29332	1	1.29	1.233	1.264	0.806	0.824	0.857
hsa04722 Neurotrophin signaling pathway	0.301815	6	1.3	P60953	153	0.577	Down	0.000137319	K	Cell division control protein 42 homolog OS=Homo sapiens OX=9606 GN=CDC42 PE=1 SV=2	CDC42	1	2.59121e-13	142.45	AVK(1)YVECSALTQK	2	-0.94283	2	1.369	1.297	1.364	0.804	0.724	0.799
hsa04722 Neurotrophin signaling pathway	0.301815	6	1.3	Q13557	292	0.489	Down	0.00073807	K	Calcium/calmodulin-dependent protein kinase type II subunit delta OS=Homo sapiens OX=9606 GN=CAMK2D PE=1 SV=3	CAMK2D	1	0.0244498	51.436	QETVDCLK(1)K	3	0.21401	1	1.637	1.358	1.344	0.655	0.756	0.712
hsa04722 Neurotrophin signaling pathway	0.301815	6	1.3	Q6A1A2	277	0.634	Down	0.006397	K	Putative 3-phosphoinositide-dependent protein kinase 2 OS=Homo sapiens OX=9606 GN=PDPK2P PE=5 SV=1	PDPK2P	1	0.00344264	56.205	LEYDFPEK(1)FFPK	3	1.5294	1	1.1	1.286	1.462	0.823	0.773	0.842
hsa04722 Neurotrophin signaling pathway	0.301815	6	1.3	Q06124	178	0.256	Down	1.83063e-05	K	Tyrosine-protein phosphatase non-receptor type 11 OS=Homo sapiens OX=9606 GN=PTPN11 PE=1 SV=2	PTPN11	1	0.00118893	79.346	CQELK(1)YDVGGGER	2	0.10773	2	1.739	1.852	1.824	0.421	0.505	0.46
hsa04722 Neurotrophin signaling pathway	0.301815	6	1.3	P61586	104	0.588	Down	4.1025e-05	K	Transforming protein RhoA OS=Homo sapiens OX=9606 GN=RHOA PE=1 SV=1	RHOA	1	5.97999e-08	100.02	WTPEVK(1)HFCPNVPIILVGNK	4	0.21964	2	1.315	1.323	1.356	0.779	0.749	0.819
hsa04218 Cellular senescence	0.239544	10	1.27	P45880	72	0.622	Down	2.3124e-06	K	Voltage-dependent anion-selective channel protein 2 OS=Homo sapiens OX=9606 GN=VDAC2 PE=1 SV=2	VDAC2	1	0.000246964	111.63	VTGTLETK(1)YK	2	0.39095	2	1.319	1.297	1.275	0.822	0.794	0.804
hsa04218 Cellular senescence	0.239544	10	1.27	P45880	45	0.523	Down	5.6922e-05	K	Voltage-dependent anion-selective channel protein 2 OS=Homo sapiens OX=9606 GN=VDAC2 PE=1 SV=2	VDAC2	1	1.52592e-30	152.64	TK(1)SCSGVEFSTSGSSNTDTGK	3	-0.27456	1	1.446	1.328	1.439	0.757	0.745	0.703
hsa04218 Cellular senescence	0.239544	10	1.27	P06400	65	0.464	Down	0.002224	K	Retinoblastoma-associated protein OS=Homo sapiens OX=9606 GN=RB1 PE=1 SV=2	RB1	1	0.00150538	94.114	LK(1)IPDHVR	3	-0.34904	1	1.381	1.521	1.526	0.796	0.554	0.706
hsa04218 Cellular senescence	0.239544	10	1.27	Q9Y277	61	0.61	Down	6.2345e-05	K	Voltage-dependent anion-selective channel protein 3 OS=Homo sapiens OX=9606 GN=VDAC3 PE=1 SV=1	VDAC3	1	2.31395e-05	127.17	ASGNLETK(1)YK	3	-1.1902	4	1.36	1.318	1.248	0.78	0.817	0.798
hsa04218 Cellular senescence	0.239544	10	1.27	P07384	365	0.58	Down	0.00039788	K	Calpain-1 catalytic subunit OS=Homo sapiens OX=9606 GN=CAPN1 PE=1 SV=1	CAPN1	1	0.00632361	70.438	K(1)WNTTLYEGTWR	2	3.9524	1	1.252	1.335	1.427	0.794	0.728	0.808
hsa04218 Cellular senescence	0.239544	10	1.27	Q04206	122	0.545	Down	0.0071434	K	Transcription factor p65 OS=Homo sapiens OX=9606 GN=RELA PE=1 SV=2	RELA	1	3.64055e-22	149.32	CIHSFQNLGIQCVK(1)K	3	0.47742	1	1.382	1.379	1.378	0.794	0.785	0.676
hsa04218 Cellular senescence	0.239544	10	1.27	Q04206	195	0.657	Down	4.2829e-05	K	Transcription factor p65 OS=Homo sapiens OX=9606 GN=RELA PE=1 SV=2	RELA	1	0.00217284	81.48	APNTAELK(1)ICR	2	-0.29332	1	1.29	1.233	1.264	0.806	0.824	0.857
hsa04218 Cellular senescence	0.239544	10	1.27	P62136	41	0.561	Down	0.000119643	K	Serine/threonine-protein phosphatase PP1-alpha catalytic subunit OS=Homo sapiens OX=9606 GN=PPP1CA PE=1 SV=1	PPP1CA	1	0.0182236	88.954	GLCLK(1)SR	2	0.99693	1	1.421	1.279	1.382	0.769	0.732	0.791
hsa04218 Cellular senescence	0.239544	10	1.27	Q92878	1291	0.388	Down	1.72987e-05	K	DNA repair protein RAD50 OS=Homo sapiens OX=9606 GN=RAD50 PE=1 SV=1	RAD50	1	1.56938e-08	143.98	K(1)NIDQCSEIVK	2	0.59487	1	1.599	1.519	1.629	0.586	0.651	0.605
hsa04218 Cellular senescence	0.239544	10	1.27	O14757	53	0.504	Down	2.4938e-05	K	Serine/threonine-protein kinase Chk1 OS=Homo sapiens OX=9606 GN=CHEK1 PE=1 SV=2	CHEK1	1	0.000367894	107.06	AVDCPENIK(1)K	2	-0.18789	1	1.351	1.44	1.483	0.713	0.7	0.742
hsa04218 Cellular senescence	0.239544	10	1.27	P63098	91	0.609	Down	2.1079e-05	K	Calcineurin subunit B type 1 OS=Homo sapiens OX=9606 GN=PPP3R1 PE=1 SV=2	PPP3R1	0.992001	0.0310274	51.528	GDK(0.008)EQK(0.992)LR	3	1.0201	1	1.276	1.344	1.307	0.772	0.811	0.808
hsa04218 Cellular senescence	0.239544	10	1.27	Q14573	258	0.471	Down	3.6728e-06	K	Inositol 1,4,5-trisphosphate receptor type 3 OS=Homo sapiens OX=9606 GN=ITPR3 PE=1 SV=2	ITPR3	1	0.000333363	105.13	FLTCDEYK(1)GK	2	-1.2035	2	1.529	1.425	1.454	0.707	0.674	0.693
hsa04930 Type II diabetes mellitus	0.718359	1	0.92	P14618	162	0.464	Down	0.00025908	K	Pyruvate kinase PKM OS=Homo sapiens OX=9606 GN=PKM PE=1 SV=4	PKM	1	6.49953e-05	90.725	CDENILWLDYK(1)NICK	3	-0.11353	1	1.459	1.39	1.578	0.656	0.756	0.643
hsa04930 Type II diabetes mellitus	0.718359	1	0.92	P14618	322	0.414	Down	1.32e-06	K	Pyruvate kinase PKM OS=Homo sapiens OX=9606 GN=PKM PE=1 SV=4	PKM	1	4.11221e-09	110.12	AGK(1)PVICATQMLESMIK	3	0.3365	2	1.583	1.521	1.528	0.626	0.629	0.664
hsa05321 Inflammatory bowel disease (IBD)	0.297739	2	1.84	Q04206	122	0.545	Down	0.0071434	K	Transcription factor p65 OS=Homo sapiens OX=9606 GN=RELA PE=1 SV=2	RELA	1	3.64055e-22	149.32	CIHSFQNLGIQCVK(1)K	3	0.47742	1	1.382	1.379	1.378	0.794	0.785	0.676
hsa05321 Inflammatory bowel disease (IBD)	0.297739	2	1.84	Q04206	195	0.657	Down	4.2829e-05	K	Transcription factor p65 OS=Homo sapiens OX=9606 GN=RELA PE=1 SV=2	RELA	1	0.00217284	81.48	APNTAELK(1)ICR	2	-0.29332	1	1.29	1.233	1.264	0.806	0.824	0.857
hsa05321 Inflammatory bowel disease (IBD)	0.297739	2	1.84	P42224	152	0.61	Down	0.00037983	K	Signal transducer and activator of transcription 1-alpha/beta OS=Homo sapiens OX=9606 GN=STAT1 PE=1 SV=2	STAT1	1	0.00351683	63.091	DK(1)VMCIEHEIK	3	-0.25958	1	1.219	1.385	1.319	0.803	0.829	0.762
hsa04728 Dopaminergic synapse	0.0638534	9	1.66	P33176	67	0.533	Down	0.00088467	K	Kinesin-1 heavy chain OS=Homo sapiens OX=9606 GN=KIF5B PE=1 SV=1	KIF5B	1	5.88998e-14	122.01	VFQSSTSQEQVYNDCAK(1)K	3	-0.38476	1	1.238	1.369	1.564	0.765	0.715	0.742
hsa04728 Dopaminergic synapse	0.0638534	9	1.66	P67775	29	0.542	Down	0.0023993	K	Serine/threonine-protein phosphatase 2A catalytic subunit alpha isoform OS=Homo sapiens OX=9606 GN=PPP2CA PE=1 SV=1	PPP2CA	1	1.14086e-10	122.97	QLSESQVK(1)SLCEK	3	0.11263	1	1.225	1.535	1.379	0.801	0.66	0.784
hsa04728 Dopaminergic synapse	0.0638534	9	1.66	P63092	8	0.162	Down	1.3942e-07	K	Guanine nucleotide-binding protein G(s) subunit alpha isoforms short OS=Homo sapiens OX=9606 GN=GNAS PE=1 SV=1	GNAS	1	0.00017262	97.463	GCLGNSK(1)TEDQR	2	-0.98053	1	2.08	2.045	1.911	0.324	0.323	0.33
hsa04728 Dopaminergic synapse	0.0638534	9	1.66	P17252	575	0.62	Down	0.0034987	K	Protein kinase C alpha type OS=Homo sapiens OX=9606 GN=PRKCA PE=1 SV=4	PRKCA	1	0.00296928	74.92	GLMTK(1)HPAK	3	-0.94664	1	1.458	1.172	1.271	0.802	0.869	0.748
hsa04728 Dopaminergic synapse	0.0638534	9	1.66	Q14738	121	0.585	Down	1.5816e-07	K	Serine/threonine-protein phosphatase 2A 56 kDa regulatory subunit delta isoform OS=Homo sapiens OX=9606 GN=PPP2R5D PE=1 SV=1	PPP2R5D	1	0.00140172	94.692	EELFIQK(1)LR	2	0.12183	1	1.336	1.341	1.325	0.77	0.784	0.789
hsa04728 Dopaminergic synapse	0.0638534	9	1.66	Q13557	292	0.489	Down	0.00073807	K	Calcium/calmodulin-dependent protein kinase type II subunit delta OS=Homo sapiens OX=9606 GN=CAMK2D PE=1 SV=3	CAMK2D	1	0.0244498	51.436	QETVDCLK(1)K	3	0.21401	1	1.637	1.358	1.344	0.655	0.756	0.712
hsa04728 Dopaminergic synapse	0.0638534	9	1.66	Q9UD71	152	0.452	Down	0.00023867	K	Protein phosphatase 1 regulatory subunit 1B OS=Homo sapiens OX=9606 GN=PPP1R1B PE=1 SV=2	PPP1R1B	1	4.97004e-20	100.86	QSAGQK(1)TTCGQGLEGPWERPPPLDESER	3	-0.61595	2	1.578	1.531	1.369	0.662	0.628	0.736
hsa04728 Dopaminergic synapse	0.0638534	9	1.66	P62136	41	0.561	Down	0.000119643	K	Serine/threonine-protein phosphatase PP1-alpha catalytic subunit OS=Homo sapiens OX=9606 GN=PPP1CA PE=1 SV=1	PPP1CA	1	0.0182236	88.954	GLCLK(1)SR	2	0.99693	1	1.421	1.279	1.382	0.769	0.732	0.791
hsa04728 Dopaminergic synapse	0.0638534	9	1.66	Q14573	258	0.471	Down	3.6728e-06	K	Inositol 1,4,5-trisphosphate receptor type 3 OS=Homo sapiens OX=9606 GN=ITPR3 PE=1 SV=2	ITPR3	1	0.000333363	105.13	FLTCDEYK(1)GK	2	-1.2035	2	1.529	1.425	1.454	0.707	0.674	0.693
hsa04933 AGE-RAGE signaling pathway in diabetic complications	0.417358	4	1.23	Q04206	122	0.545	Down	0.0071434	K	Transcription factor p65 OS=Homo sapiens OX=9606 GN=RELA PE=1 SV=2	RELA	1	3.64055e-22	149.32	CIHSFQNLGIQCVK(1)K	3	0.47742	1	1.382	1.379	1.378	0.794	0.785	0.676
hsa04933 AGE-RAGE signaling pathway in diabetic complications	0.417358	4	1.23	Q04206	195	0.657	Down	4.2829e-05	K	Transcription factor p65 OS=Homo sapiens OX=9606 GN=RELA PE=1 SV=2	RELA	1	0.00217284	81.48	APNTAELK(1)ICR	2	-0.29332	1	1.29	1.233	1.264	0.806	0.824	0.857
hsa04933 AGE-RAGE signaling pathway in diabetic complications	0.417358	4	1.23	P17252	575	0.62	Down	0.0034987	K	Protein kinase C alpha type OS=Homo sapiens OX=9606 GN=PRKCA PE=1 SV=4	PRKCA	1	0.00296928	74.92	GLMTK(1)HPAK	3	-0.94664	1	1.458	1.172	1.271	0.802	0.869	0.748
hsa04933 AGE-RAGE signaling pathway in diabetic complications	0.417358	4	1.23	P42224	152	0.61	Down	0.00037983	K	Signal transducer and activator of transcription 1-alpha/beta OS=Homo sapiens OX=9606 GN=STAT1 PE=1 SV=2	STAT1	1	0.00351683	63.091	DK(1)VMCIEHEIK	3	-0.25958	1	1.219	1.385	1.319	0.803	0.829	0.762
hsa04933 AGE-RAGE signaling pathway in diabetic complications	0.417358	4	1.23	P60953	153	0.577	Down	0.000137319	K	Cell division control protein 42 homolog OS=Homo sapiens OX=9606 GN=CDC42 PE=1 SV=2	CDC42	1	2.59121e-13	142.45	AVK(1)YVECSALTQK	2	-0.94283	2	1.369	1.297	1.364	0.804	0.724	0.799
hsa04725 Cholinergic synapse	0.374653	3	1.38	P17252	575	0.62	Down	0.0034987	K	Protein kinase C alpha type OS=Homo sapiens OX=9606 GN=PRKCA PE=1 SV=4	PRKCA	1	0.00296928	74.92	GLMTK(1)HPAK	3	-0.94664	1	1.458	1.172	1.271	0.802	0.869	0.748
hsa04725 Cholinergic synapse	0.374653	3	1.38	Q13557	292	0.489	Down	0.00073807	K	Calcium/calmodulin-dependent protein kinase type II subunit delta OS=Homo sapiens OX=9606 GN=CAMK2D PE=1 SV=3	CAMK2D	1	0.0244498	51.436	QETVDCLK(1)K	3	0.21401	1	1.637	1.358	1.344	0.655	0.756	0.712
hsa04725 Cholinergic synapse	0.374653	3	1.38	Q14573	258	0.471	Down	3.6728e-06	K	Inositol 1,4,5-trisphosphate receptor type 3 OS=Homo sapiens OX=9606 GN=ITPR3 PE=1 SV=2	ITPR3	1	0.000333363	105.13	FLTCDEYK(1)GK	2	-1.2035	2	1.529	1.425	1.454	0.707	0.674	0.693
hsa05010 Alzheimer disease	0.998235	4	0.37	P51970	38	0.266	Down	2.3488e-06	K	NADH dehydrogenase [ubiquinone] 1 alpha subcomplex subunit 8 OS=Homo sapiens OX=9606 GN=NDUFA8 PE=1 SV=3	NDUFA8	1	0.00170306	54.09	AAAHHYGAQCDK(1)PNK	3	-0.081265	3	1.827	1.722	1.816	0.446	0.503	0.476
hsa05010 Alzheimer disease	0.998235	4	0.37	P63098	91	0.609	Down	2.1079e-05	K	Calcineurin subunit B type 1 OS=Homo sapiens OX=9606 GN=PPP3R1 PE=1 SV=2	PPP3R1	0.992001	0.0310274	51.528	GDK(0.008)EQK(0.992)LR	3	1.0201	1	1.276	1.344	1.307	0.772	0.811	0.808
hsa05010 Alzheimer disease	0.998235	4	0.37	P07384	365	0.58	Down	0.00039788	K	Calpain-1 catalytic subunit OS=Homo sapiens OX=9606 GN=CAPN1 PE=1 SV=1	CAPN1	1	0.00632361	70.438	K(1)WNTTLYEGTWR	2	3.9524	1	1.252	1.335	1.427	0.794	0.728	0.808
hsa05010 Alzheimer disease	0.998235	4	0.37	Q14573	258	0.471	Down	3.6728e-06	K	Inositol 1,4,5-trisphosphate receptor type 3 OS=Homo sapiens OX=9606 GN=ITPR3 PE=1 SV=2	ITPR3	1	0.000333363	105.13	FLTCDEYK(1)GK	2	-1.2035	2	1.529	1.425	1.454	0.707	0.674	0.693
hsa05418 Fluid shear stress and atherosclerosis	0.629282	7	0.96	Q04206	122	0.545	Down	0.0071434	K	Transcription factor p65 OS=Homo sapiens OX=9606 GN=RELA PE=1 SV=2	RELA	1	3.64055e-22	149.32	CIHSFQNLGIQCVK(1)K	3	0.47742	1	1.382	1.379	1.378	0.794	0.785	0.676
hsa05418 Fluid shear stress and atherosclerosis	0.629282	7	0.96	Q04206	195	0.657	Down	4.2829e-05	K	Transcription factor p65 OS=Homo sapiens OX=9606 GN=RELA PE=1 SV=2	RELA	1	0.00217284	81.48	APNTAELK(1)ICR	2	-0.29332	1	1.29	1.233	1.264	0.806	0.824	0.857
hsa05418 Fluid shear stress and atherosclerosis	0.629282	7	0.96	P08238	559	0.479	Down	1.56421e-05	K	Heat shock protein HSP 90-beta OS=Homo sapiens OX=9606 GN=HSP90AB1 PE=1 SV=4	HSP90AB1	1	0.00072324	111.17	AK(1)FENLCK	3	-0.027707	2	1.508	1.469	1.398	0.714	0.677	0.704
hsa05418 Fluid shear stress and atherosclerosis	0.629282	7	0.96	P08238	568	0.153	Down	1.0451e-06	K	Heat shock protein HSP 90-beta OS=Homo sapiens OX=9606 GN=HSP90AB1 PE=1 SV=4	HSP90AB1	1	0.0129056	82.417	LMK(1)EILDK	2	-0.52759	1	2.117	2.005	1.986	0.335	0.306	0.291
hsa05418 Fluid shear stress and atherosclerosis	0.629282	7	0.96	P08238	557	0.623	Down	1.2245e-06	K	Heat shock protein HSP 90-beta OS=Homo sapiens OX=9606 GN=HSP90AB1 PE=1 SV=4	HSP90AB1	1	0.0285507	80.219	MEESK(1)AK	2	0.84477	2	1.31	1.303	1.275	0.801	0.799	0.821
hsa05418 Fluid shear stress and atherosclerosis	0.629282	7	0.96	P63261	291	0.532	Down	4.2125e-05	K	Actin, cytoplasmic 2 OS=Homo sapiens OX=9606 GN=ACTG1 PE=1 SV=1	ACTG1	1	1.10521e-10	103.84	K(1)DLYANTVLSGGTTMYPGIADR	2	0.54304	5	1.347	1.356	1.477	0.746	0.756	0.72
hsa05418 Fluid shear stress and atherosclerosis	0.629282	7	0.96	Q58FF8	332	0.479	Down	1.56421e-05	K	Putative heat shock protein HSP 90-beta 2 OS=Homo sapiens OX=9606 GN=HSP90AB2P PE=1 SV=2	HSP90AB2P	1	0.00072324	111.17	AK(1)FENLCK	3	-0.027707	2	1.508	1.469	1.398	0.714	0.677	0.704
hsa05418 Fluid shear stress and atherosclerosis	0.629282	7	0.96	P00966	340	0.567	Down	0.000156695	K	Argininosuccinate synthase OS=Homo sapiens OX=9606 GN=ASS1 PE=1 SV=2	ASS1	1	1.39584e-05	141.29	HCIAK(1)SQER	3	-1.5444	4	1.294	1.428	1.338	0.793	0.786	0.725
hsa05418 Fluid shear stress and atherosclerosis	0.629282	7	0.96	P07900	567	0.531	Down	2.4582e-05	K	Heat shock protein HSP 90-alpha OS=Homo sapiens OX=9606 GN=HSP90AA1 PE=1 SV=5	HSP90AA1	1	0.000535464	107.01	TK(1)FENLCK	3	0.23519	3	1.473	1.347	1.365	0.728	0.755	0.74
hsa05418 Fluid shear stress and atherosclerosis	0.629282	7	0.96	P07900	576	0.235	Down	5.6281e-07	K	Heat shock protein HSP 90-alpha OS=Homo sapiens OX=9606 GN=HSP90AA1 PE=1 SV=5	HSP90AA1	1	0.00316475	93.096	IMK(1)DILEK	3	0.51489	4	1.881	1.876	1.791	0.418	0.456	0.43
hsa05418 Fluid shear stress and atherosclerosis	0.629282	7	0.96	P61586	104	0.588	Down	4.1025e-05	K	Transforming protein RhoA OS=Homo sapiens OX=9606 GN=RHOA PE=1 SV=1	RHOA	1	5.97999e-08	100.02	WTPEVK(1)HFCPNVPIILVGNK	4	0.21964	2	1.315	1.323	1.356	0.779	0.749	0.819
hsa05132 Salmonella infection	0.0481713	10	1.68	P21333	578	0.272	Down	6.0056e-08	K	Filamin-A OS=Homo sapiens OX=9606 GN=FLNA PE=1 SV=4	FLNA	1	0.000120036	101.56	VGTECGNQK(1)VR	2	-0.21816	1	1.73	1.815	1.784	0.486	0.476	0.485
hsa05132 Salmonella infection	0.0481713	10	1.68	P21333	2000	0.359	Down	1.8799e-07	K	Filamin-A OS=Homo sapiens OX=9606 GN=FLNA PE=1 SV=4	FLNA	1	0.0408648	66.692	EEPCLLK(1)R	2	-0.50213	1	1.675	1.62	1.586	0.582	0.588	0.583
hsa05132 Salmonella infection	0.0481713	10	1.68	P21333	1450	0.495	Down	6.2437e-05	K	Filamin-A OS=Homo sapiens OX=9606 GN=FLNA PE=1 SV=4	FLNA	1	0.00011233	90.793	VPVHDVTDASK(1)VK	3	0.48724	1	1.479	1.441	1.393	0.691	0.679	0.764
hsa05132 Salmonella infection	0.0481713	10	1.68	P60953	153	0.577	Down	0.000137319	K	Cell division control protein 42 homolog OS=Homo sapiens OX=9606 GN=CDC42 PE=1 SV=2	CDC42	1	2.59121e-13	142.45	AVK(1)YVECSALTQK	2	-0.94283	2	1.369	1.297	1.364	0.804	0.724	0.799
hsa05132 Salmonella infection	0.0481713	10	1.68	O75369	2530	0.633	Down	0.0030407	K	Filamin-B OS=Homo sapiens OX=9606 GN=FLNB PE=1 SV=2	FLNB	1	3.33764e-08	107.35	AFVGQK(1)SSFLVDCSK	3	-1.854	1	1.148	1.351	1.348	0.758	0.791	0.886
hsa05132 Salmonella infection	0.0481713	10	1.68	Q04206	122	0.545	Down	0.0071434	K	Transcription factor p65 OS=Homo sapiens OX=9606 GN=RELA PE=1 SV=2	RELA	1	3.64055e-22	149.32	CIHSFQNLGIQCVK(1)K	3	0.47742	1	1.382	1.379	1.378	0.794	0.785	0.676
hsa05132 Salmonella infection	0.0481713	10	1.68	Q04206	195	0.657	Down	4.2829e-05	K	Transcription factor p65 OS=Homo sapiens OX=9606 GN=RELA PE=1 SV=2	RELA	1	0.00217284	81.48	APNTAELK(1)ICR	2	-0.29332	1	1.29	1.233	1.264	0.806	0.824	0.857
hsa05132 Salmonella infection	0.0481713	10	1.68	Q14204	4441	0.577	Down	0.000176915	K	Cytoplasmic dynein 1 heavy chain 1 OS=Homo sapiens OX=9606 GN=DYNC1H1 PE=1 SV=5	DYNC1H1	1	0.000216834	86.497	QDLADVVQVCEGK(1)K	3	0.12214	1	1.382	1.322	1.325	0.728	0.765	0.83
hsa05132 Salmonella infection	0.0481713	10	1.68	Q14204	1496	0.648	Down	5.8581e-05	K	Cytoplasmic dynein 1 heavy chain 1 OS=Homo sapiens OX=9606 GN=DYNC1H1 PE=1 SV=5	DYNC1H1	1	0.000315582	108.7	GWDDLFNK(1)VK	2	0.24714	2	1.318	1.266	1.231	0.842	0.803	0.828
hsa05132 Salmonella infection	0.0481713	10	1.68	P35080	91	0.569	Down	6.4911e-05	K	Profilin-2 OS=Homo sapiens OX=9606 GN=PFN2 PE=1 SV=3	PFN2	1	2.21305e-17	141.13	TK(1)SQGGEPTYNVAVGR	2	-0.6162	4	1.368	1.303	1.383	0.736	0.762	0.809
hsa05132 Salmonella infection	0.0481713	10	1.68	P63261	291	0.532	Down	4.2125e-05	K	Actin, cytoplasmic 2 OS=Homo sapiens OX=9606 GN=ACTG1 PE=1 SV=1	ACTG1	1	1.10521e-10	103.84	K(1)DLYANTVLSGGTTMYPGIADR	2	0.54304	5	1.347	1.356	1.477	0.746	0.756	0.72
hsa05132 Salmonella infection	0.0481713	10	1.68	Q9H0B6	369	0.384	Down	4.6155e-06	K	Kinesin light chain 2 OS=Homo sapiens OX=9606 GN=KLC2 PE=1 SV=1	KLC2	1	2.76762e-08	142.38	TK(1)NNLASCYLK	2	-0.26727	1	1.643	1.509	1.614	0.598	0.596	0.637
hsa05132 Salmonella infection	0.0481713	10	1.68	O15143	339	0.54	Down	0.00104414	K	Actin-related protein 2/3 complex subunit 1B OS=Homo sapiens OX=9606 GN=ARPC1B PE=1 SV=3	ARPC1B	1	0.00064804	58.814	NSVSQISVLSGGK(1)AK	3	-0.51814	1	1.463	1.367	1.33	0.828	0.761	0.658
hsa05132 Salmonella infection	0.0481713	10	1.68	P07737	126	0.597	Down	4.0356e-05	K	Profilin-1 OS=Homo sapiens OX=9606 GN=PFN1 PE=1 SV=2	PFN1	1	0.000553746	60.255	EGVHGGLINK(1)K	3	-0.44079	2	1.311	1.369	1.285	0.819	0.779	0.771
hsa05165 Human papillomavirus infection	0.273255	15	1.18	Q09472	1590	0.62	Down	0.00020271	K	Histone acetyltransferase p300 OS=Homo sapiens OX=9606 GN=EP300 PE=1 SV=2	EP300	1	0.00029002	91.867	LYATMEK(1)HK	3	-0.76884	4	1.377	1.286	1.238	0.838	0.789	0.79
hsa05165 Human papillomavirus infection	0.273255	15	1.18	P67775	29	0.542	Down	0.0023993	K	Serine/threonine-protein phosphatase 2A catalytic subunit alpha isoform OS=Homo sapiens OX=9606 GN=PPP2CA PE=1 SV=1	PPP2CA	1	1.14086e-10	122.97	QLSESQVK(1)SLCEK	3	0.11263	1	1.225	1.535	1.379	0.801	0.66	0.784
hsa05165 Human papillomavirus infection	0.273255	15	1.18	Q14160	19	0.607	Down	0.0050796	K	Protein scribble homolog OS=Homo sapiens OX=9606 GN=SCRIB PE=1 SV=4	SCRIB	1	0.0242747	56.258	HVESVDK(1)R	3	1.6165	1	1.369	1.34	1.22	0.675	0.813	0.897
hsa05165 Human papillomavirus infection	0.273255	15	1.18	P63092	8	0.162	Down	1.3942e-07	K	Guanine nucleotide-binding protein G(s) subunit alpha isoforms short OS=Homo sapiens OX=9606 GN=GNAS PE=1 SV=1	GNAS	1	0.00017262	97.463	GCLGNSK(1)TEDQR	2	-0.98053	1	2.08	2.045	1.911	0.324	0.323	0.33
hsa05165 Human papillomavirus infection	0.273255	15	1.18	P60953	153	0.577	Down	0.000137319	K	Cell division control protein 42 homolog OS=Homo sapiens OX=9606 GN=CDC42 PE=1 SV=2	CDC42	1	2.59121e-13	142.45	AVK(1)YVECSALTQK	2	-0.94283	2	1.369	1.297	1.364	0.804	0.724	0.799
hsa05165 Human papillomavirus infection	0.273255	15	1.18	P06400	65	0.464	Down	0.002224	K	Retinoblastoma-associated protein OS=Homo sapiens OX=9606 GN=RB1 PE=1 SV=2	RB1	1	0.00150538	94.114	LK(1)IPDHVR	3	-0.34904	1	1.381	1.521	1.526	0.796	0.554	0.706
hsa05165 Human papillomavirus infection	0.273255	15	1.18	Q14738	121	0.585	Down	1.5816e-07	K	Serine/threonine-protein phosphatase 2A 56 kDa regulatory subunit delta isoform OS=Homo sapiens OX=9606 GN=PPP2R5D PE=1 SV=1	PPP2R5D	1	0.00140172	94.692	EELFIQK(1)LR	2	0.12183	1	1.336	1.341	1.325	0.77	0.784	0.789
hsa05165 Human papillomavirus infection	0.273255	15	1.18	P36543	138	0.569	Down	2.1349e-05	K	V-type proton ATPase subunit E 1 OS=Homo sapiens OX=9606 GN=ATP6V1E1 PE=1 SV=1	ATP6V1E1	1	0.01156	85.355	K(1)QDFPLVK	3	0.41354	2	1.333	1.367	1.353	0.748	0.806	0.753
hsa05165 Human papillomavirus infection	0.273255	15	1.18	P16144	834	0.349	Down	1.481e-06	K	Integrin beta-4 OS=Homo sapiens OX=9606 GN=ITGB4 PE=1 SV=5	ITGB4	1	1.56452e-06	115.12	LCTENLLK(1)PDTR	3	-0.48166	2	1.603	1.662	1.661	0.6	0.55	0.57
hsa05165 Human papillomavirus infection	0.273255	15	1.18	Q04206	122	0.545	Down	0.0071434	K	Transcription factor p65 OS=Homo sapiens OX=9606 GN=RELA PE=1 SV=2	RELA	1	3.64055e-22	149.32	CIHSFQNLGIQCVK(1)K	3	0.47742	1	1.382	1.379	1.378	0.794	0.785	0.676
hsa05165 Human papillomavirus infection	0.273255	15	1.18	Q04206	195	0.657	Down	4.2829e-05	K	Transcription factor p65 OS=Homo sapiens OX=9606 GN=RELA PE=1 SV=2	RELA	1	0.00217284	81.48	APNTAELK(1)ICR	2	-0.29332	1	1.29	1.233	1.264	0.806	0.824	0.857
hsa05165 Human papillomavirus infection	0.273255	15	1.18	P42224	152	0.61	Down	0.00037983	K	Signal transducer and activator of transcription 1-alpha/beta OS=Homo sapiens OX=9606 GN=STAT1 PE=1 SV=2	STAT1	1	0.00351683	63.091	DK(1)VMCIEHEIK	3	-0.25958	1	1.219	1.385	1.319	0.803	0.829	0.762
hsa05165 Human papillomavirus infection	0.273255	15	1.18	P21281	109	0.48	Down	5.5611e-07	K	V-type proton ATPase subunit B, brain isoform OS=Homo sapiens OX=9606 GN=ATP6V1B2 PE=1 SV=3	ATP6V1B2	1	0.000924525	87.718	K(1)TSCEFTGDILR	3	-0.37516	3	1.482	1.45	1.439	0.716	0.687	0.694
hsa05165 Human papillomavirus infection	0.273255	15	1.18	P21281	108	0.532	Down	0.0050152	K	V-type proton ATPase subunit B, brain isoform OS=Homo sapiens OX=9606 GN=ATP6V1B2 PE=1 SV=3	ATP6V1B2	1	1.83584e-08	108.14	AVVQVFEGTSGIDAK(1)K	3	0.31694	1	1.399	1.378	1.407	0.809	0.702	0.715
hsa05165 Human papillomavirus infection	0.273255	15	1.18	P38606	132	0.405	Down	1.77762e-05	K	V-type proton ATPase catalytic subunit A OS=Homo sapiens OX=9606 GN=ATP6V1A PE=1 SV=2	ATP6V1A	1	0.000353207	107.09	DIK(1)WDFTPCK	2	-0.13164	2	1.639	1.537	1.502	0.652	0.641	0.6
hsa05165 Human papillomavirus infection	0.273255	15	1.18	Q13547	412	0.47	Down	0.0032599	K	Histone deacetylase 1 OS=Homo sapiens OX=9606 GN=HDAC1 PE=1 SV=1	HDAC1	1	0.00172616	93.096	ISICSSDK(1)R	2	-1.0844	1	1.453	1.472	1.484	0.747	0.681	0.645
hsa05165 Human papillomavirus infection	0.273255	15	1.18	P14618	162	0.464	Down	0.00025908	K	Pyruvate kinase PKM OS=Homo sapiens OX=9606 GN=PKM PE=1 SV=4	PKM	1	6.49953e-05	90.725	CDENILWLDYK(1)NICK	3	-0.11353	1	1.459	1.39	1.578	0.656	0.756	0.643
hsa05165 Human papillomavirus infection	0.273255	15	1.18	P14618	322	0.414	Down	1.32e-06	K	Pyruvate kinase PKM OS=Homo sapiens OX=9606 GN=PKM PE=1 SV=4	PKM	1	4.11221e-09	110.12	AGK(1)PVICATQMLESMIK	3	0.3365	2	1.583	1.521	1.528	0.626	0.629	0.664
hsa04917 Prolactin signaling pathway	0.748716	2	0.82	Q04206	122	0.545	Down	0.0071434	K	Transcription factor p65 OS=Homo sapiens OX=9606 GN=RELA PE=1 SV=2	RELA	1	3.64055e-22	149.32	CIHSFQNLGIQCVK(1)K	3	0.47742	1	1.382	1.379	1.378	0.794	0.785	0.676
hsa04917 Prolactin signaling pathway	0.748716	2	0.82	Q04206	195	0.657	Down	4.2829e-05	K	Transcription factor p65 OS=Homo sapiens OX=9606 GN=RELA PE=1 SV=2	RELA	1	0.00217284	81.48	APNTAELK(1)ICR	2	-0.29332	1	1.29	1.233	1.264	0.806	0.824	0.857
hsa04917 Prolactin signaling pathway	0.748716	2	0.82	P42224	152	0.61	Down	0.00037983	K	Signal transducer and activator of transcription 1-alpha/beta OS=Homo sapiens OX=9606 GN=STAT1 PE=1 SV=2	STAT1	1	0.00351683	63.091	DK(1)VMCIEHEIK	3	-0.25958	1	1.219	1.385	1.319	0.803	0.829	0.762
hsa05168 Herpes simplex virus 1 infection	0.778684	7	0.83	Q04206	122	0.545	Down	0.0071434	K	Transcription factor p65 OS=Homo sapiens OX=9606 GN=RELA PE=1 SV=2	RELA	1	3.64055e-22	149.32	CIHSFQNLGIQCVK(1)K	3	0.47742	1	1.382	1.379	1.378	0.794	0.785	0.676
hsa05168 Herpes simplex virus 1 infection	0.778684	7	0.83	Q04206	195	0.657	Down	4.2829e-05	K	Transcription factor p65 OS=Homo sapiens OX=9606 GN=RELA PE=1 SV=2	RELA	1	0.00217284	81.48	APNTAELK(1)ICR	2	-0.29332	1	1.29	1.233	1.264	0.806	0.824	0.857
hsa05168 Herpes simplex virus 1 infection	0.778684	7	0.83	P62136	41	0.561	Down	0.000119643	K	Serine/threonine-protein phosphatase PP1-alpha catalytic subunit OS=Homo sapiens OX=9606 GN=PPP1CA PE=1 SV=1	PPP1CA	1	0.0182236	88.954	GLCLK(1)SR	2	0.99693	1	1.421	1.279	1.382	0.769	0.732	0.791
hsa05168 Herpes simplex virus 1 infection	0.778684	7	0.83	P23497	306	0.61	Down	0.000123111	K	Nuclear autoantigen Sp-100 OS=Homo sapiens OX=9606 GN=SP100 PE=1 SV=3	SP100	0.999976	0.000156458	85.176	EKPFSNSK(1)VECQAQAR	3	-0.25067	1	1.369	1.23	1.33	0.801	0.783	0.812
hsa05168 Herpes simplex virus 1 infection	0.778684	7	0.83	P42224	152	0.61	Down	0.00037983	K	Signal transducer and activator of transcription 1-alpha/beta OS=Homo sapiens OX=9606 GN=STAT1 PE=1 SV=2	STAT1	1	0.00351683	63.091	DK(1)VMCIEHEIK	3	-0.25958	1	1.219	1.385	1.319	0.803	0.829	0.762
hsa05168 Herpes simplex virus 1 infection	0.778684	7	0.83	P30101	94	0.42	Down	4.8366e-06	K	Protein disulfide-isomerase A3 OS=Homo sapiens OX=9606 GN=PDIA3 PE=1 SV=4	PDIA3	1	3.5914e-41	161.47	VDCTANTNTCNK(1)YGVSGYPTLK	4	-0.65929	5	1.559	1.492	1.558	0.681	0.625	0.63
hsa05168 Herpes simplex virus 1 infection	0.778684	7	0.83	P30101	415	0.45	Down	0.0022784	K	Protein disulfide-isomerase A3 OS=Homo sapiens OX=9606 GN=PDIA3 PE=1 SV=4	PDIA3	1	0.0215894	85.676	NLEPK(1)YK	3	0.15336	4	1.566	1.535	1.386	0.673	0.669	0.679
hsa05168 Herpes simplex virus 1 infection	0.778684	7	0.83	P30101	82	0.469	Down	4.061e-05	K	Protein disulfide-isomerase A3 OS=Homo sapiens OX=9606 GN=PDIA3 PE=1 SV=4	PDIA3	1	6.15521e-11	117.18	GIVPLAK(1)VDCTANTNTCNK	3	-0.14257	4	1.365	1.513	1.526	0.693	0.669	0.704
hsa05168 Herpes simplex virus 1 infection	0.778684	7	0.83	Q9NR50	382	0.66	Down	0.00027572	K	Translation initiation factor eIF-2B subunit gamma OS=Homo sapiens OX=9606 GN=EIF2B3 PE=1 SV=1	EIF2B3	1	0.0032079	72.681	SVIGSSCLIK(1)DR	2	-0.49047	1	1.309	1.21	1.262	0.812	0.875	0.807
hsa05168 Herpes simplex virus 1 infection	0.778684	7	0.83	Q06124	178	0.256	Down	1.83063e-05	K	Tyrosine-protein phosphatase non-receptor type 11 OS=Homo sapiens OX=9606 GN=PTPN11 PE=1 SV=2	PTPN11	1	0.00118893	79.346	CQELK(1)YDVGGGER	2	0.10773	2	1.739	1.852	1.824	0.421	0.505	0.46
hsa00340 Histidine metabolism	0.684257	2	0.92	P05091	52	0.475	Down	7.6005e-05	K	Aldehyde dehydrogenase, mitochondrial OS=Homo sapiens OX=9606 GN=ALDH2 PE=1 SV=2	ALDH2	1	1.86737e-16	95.646	K(1)TFPTVNPSTGEVICQVAEGDKEDVDK	4	-0.54916	1	1.456	1.43	1.497	0.65	0.681	0.75
hsa00340 Histidine metabolism	0.684257	2	0.92	P47895	48	0.492	Down	6.4523e-05	K	Aldehyde dehydrogenase family 1 member A3 OS=Homo sapiens OX=9606 GN=ALDH1A3 PE=1 SV=2	ALDH1A3	1	0.00157174	86.911	K(1)FATCNPSTR	2	-0.43183	1	1.53	1.442	1.355	0.742	0.696	0.693
hsa00062 Fatty acid elongation	0.150395	5	1.68	P55084	201	0.533	Down	8.3563e-05	K	Trifunctional enzyme subunit beta, mitochondrial OS=Homo sapiens OX=9606 GN=HADHB PE=1 SV=3	HADHB	1	0.00334774	106.2	LSLISK(1)FR	2	0.085179	1	1.327	1.423	1.427	0.77	0.759	0.697
hsa00062 Fatty acid elongation	0.150395	5	1.68	P55084	188	0.248	Down	5.8526e-08	K	Trifunctional enzyme subunit beta, mitochondrial OS=Homo sapiens OX=9606 GN=HADHB PE=1 SV=3	HADHB	1	0.000377405	113.93	LMLDLNK(1)AK	3	0.19183	2	1.873	1.814	1.785	0.46	0.448	0.449
hsa00062 Fatty acid elongation	0.150395	5	1.68	P55084	293	0.446	Down	0.00158112	K	Trifunctional enzyme subunit beta, mitochondrial OS=Homo sapiens OX=9606 GN=HADHB PE=1 SV=3	HADHB	1	0.0081807	79.116	LK(1)PAFIK	3	-0.1348	1	1.416	1.582	1.5	0.668	0.666	0.672
hsa00062 Fatty acid elongation	0.150395	5	1.68	Q9BV79	267	0.657	Down	0.00166294	K	Enoyl-[acyl-carrier-protein] reductase, mitochondrial OS=Homo sapiens OX=9606 GN=MECR PE=1 SV=2	MECR	1	4.28887e-08	110.12	LALNCVGGK(1)SSTELLR	2	0.28593	2	1.288	1.363	1.136	0.811	0.849	0.828
hsa00062 Fatty acid elongation	0.150395	5	1.68	P42765	181	0.475	Down	5.6749e-05	K	3-ketoacyl-CoA thiolase, mitochondrial OS=Homo sapiens OX=9606 GN=ACAA2 PE=1 SV=2	ACAA2	1	8.6644e-07	114.31	EECDK(1)YALQSQQR	2	-0.088702	2	1.484	1.524	1.379	0.707	0.721	0.658
hsa00062 Fatty acid elongation	0.150395	5	1.68	P50897	165	0.565	Down	1.84014e-05	K	Palmitoyl-protein thioesterase 1 OS=Homo sapiens OX=9606 GN=PPT1 PE=1 SV=1	PPT1	1	0.00182747	85.536	K(1)TLNAGAYSK	2	-0.12283	1	1.372	1.389	1.309	0.749	0.788	0.762
hsa00062 Fatty acid elongation	0.150395	5	1.68	P40939	60	0.394	Down	2.1245e-05	K	Trifunctional enzyme subunit alpha, mitochondrial OS=Homo sapiens OX=9606 GN=HADHA PE=1 SV=2	HADHA	1	0.000326831	92.38	INSPNSK(1)VNTLSK	2	1.332	1	1.576	1.647	1.499	0.632	0.583	0.645
hsa00062 Fatty acid elongation	0.150395	5	1.68	P40939	353	0.198	Down	4.0698e-07	K	Trifunctional enzyme subunit alpha, mitochondrial OS=Homo sapiens OX=9606 GN=HADHA PE=1 SV=2	HADHA	1	0.00293526	99.442	NK(1)FGAPQK	3	-0.27395	2	2.008	1.903	1.879	0.398	0.379	0.367
hsa00062 Fatty acid elongation	0.150395	5	1.68	P40939	644	0.486	Down	1.51598e-05	K	Trifunctional enzyme subunit alpha, mitochondrial OS=Homo sapiens OX=9606 GN=HADHA PE=1 SV=2	HADHA	1	4.34993e-05	101.89	GFYIYQEGVK(1)R	2	-1.1374	3	1.474	1.433	1.437	0.671	0.714	0.728
hsa00062 Fatty acid elongation	0.150395	5	1.68	P40939	411	0.18	Down	1.2788e-06	K	Trifunctional enzyme subunit alpha, mitochondrial OS=Homo sapiens OX=9606 GN=HADHA PE=1 SV=2	HADHA	1	0.0197409	87.476	GLNDK(1)VK	2	-0.16327	1	2.009	2.02	1.874	0.359	0.375	0.331
hsa00062 Fatty acid elongation	0.150395	5	1.68	P40939	386	0.624	Down	8.2494e-05	K	Trifunctional enzyme subunit alpha, mitochondrial OS=Homo sapiens OX=9606 GN=HADHA PE=1 SV=2	HADHA	1	0.0280241	80.438	GLK(1)TILK	2	-0.86368	1	1.339	1.26	1.288	0.844	0.803	0.78
hsa00062 Fatty acid elongation	0.150395	5	1.68	P40939	569	0.58	Down	0.000183724	K	Trifunctional enzyme subunit alpha, mitochondrial OS=Homo sapiens OX=9606 GN=HADHA PE=1 SV=2	HADHA	1	0.000824408	82.417	ILQEGVDPK(1)K	2	0.419	2	1.423	1.253	1.347	0.751	0.799	0.782
hsa00062 Fatty acid elongation	0.150395	5	1.68	P40939	735	0.514	Down	2.203e-05	K	Trifunctional enzyme subunit alpha, mitochondrial OS=Homo sapiens OX=9606 GN=HADHA PE=1 SV=2	HADHA	1	0.0095576	88.495	K(1)YEAAYGK	2	0.6585	2	1.358	1.433	1.45	0.712	0.759	0.709
hsa00270 Cysteine and methionine metabolism	0.618734	5	0.97	P26358	1004	0.462	Down	1.97721e-05	K	DNA (cytosine-5)-methyltransferase 1 OS=Homo sapiens OX=9606 GN=DNMT1 PE=1 SV=2	DNMT1	1	0.00280758	68.972	K(1)SNGRPNETDIK	3	-1.3658	1	1.492	1.447	1.501	0.685	0.719	0.646
hsa00270 Cysteine and methionine metabolism	0.618734	5	0.97	Q16762	14	0.602	Down	0.000136714	K	Thiosulfate sulfurtransferase OS=Homo sapiens OX=9606 GN=TST PE=1 SV=4	TST	1	4.04112e-10	123.68	ALVSTK(1)WLAESIR	2	-0.44994	1	1.32	1.255	1.377	0.814	0.808	0.758
hsa00270 Cysteine and methionine metabolism	0.618734	5	0.97	P23526	186	0.572	Down	0.00048472	K	Adenosylhomocysteinase OS=Homo sapiens OX=9606 GN=AHCY PE=1 SV=4	AHCY	1	0.000395245	89.624	VPAINVNDSVTK(1)SK	2	0.095292	2	1.431	1.362	1.258	0.792	0.811	0.715
hsa00270 Cysteine and methionine metabolism	0.618734	5	0.97	P23526	188	0.571	Down	1.57556e-05	K	Adenosylhomocysteinase OS=Homo sapiens OX=9606 GN=AHCY PE=1 SV=4	AHCY	1	3.80199e-07	138.63	SK(1)FDNLYGCR	2	0.58571	2	1.309	1.336	1.401	0.765	0.768	0.779
hsa00270 Cysteine and methionine metabolism	0.618734	5	0.97	P52788	235	0.376	Down	1.8077e-06	K	Spermine synthase OS=Homo sapiens OX=9606 GN=SMS PE=1 SV=2	SMS	1	2.75366e-05	115.12	K(1)TCGDVLDNLK	2	-1.0474	1	1.618	1.61	1.576	0.604	0.627	0.573
hsa00270 Cysteine and methionine metabolism	0.618734	5	0.97	O43865	108	0.356	Down	2.2281e-05	K	S-adenosylhomocysteine hydrolase-like protein 1 OS=Homo sapiens OX=9606 GN=AHCYL1 PE=1 SV=2	AHCYL1	1	2.22772e-05	116.24	GSSNFCVK(1)NIK	2	-0.21437	2	1.681	1.607	1.609	0.598	0.531	0.613
hsa05030 Cocaine addiction	0.203789	3	1.84	Q04206	122	0.545	Down	0.0071434	K	Transcription factor p65 OS=Homo sapiens OX=9606 GN=RELA PE=1 SV=2	RELA	1	3.64055e-22	149.32	CIHSFQNLGIQCVK(1)K	3	0.47742	1	1.382	1.379	1.378	0.794	0.785	0.676
hsa05030 Cocaine addiction	0.203789	3	1.84	Q04206	195	0.657	Down	4.2829e-05	K	Transcription factor p65 OS=Homo sapiens OX=9606 GN=RELA PE=1 SV=2	RELA	1	0.00217284	81.48	APNTAELK(1)ICR	2	-0.29332	1	1.29	1.233	1.264	0.806	0.824	0.857
hsa05030 Cocaine addiction	0.203789	3	1.84	P63092	8	0.162	Down	1.3942e-07	K	Guanine nucleotide-binding protein G(s) subunit alpha isoforms short OS=Homo sapiens OX=9606 GN=GNAS PE=1 SV=1	GNAS	1	0.00017262	97.463	GCLGNSK(1)TEDQR	2	-0.98053	1	2.08	2.045	1.911	0.324	0.323	0.33
hsa05030 Cocaine addiction	0.203789	3	1.84	Q9UD71	152	0.452	Down	0.00023867	K	Protein phosphatase 1 regulatory subunit 1B OS=Homo sapiens OX=9606 GN=PPP1R1B PE=1 SV=2	PPP1R1B	1	4.97004e-20	100.86	QSAGQK(1)TTCGQGLEGPWERPPPLDESER	3	-0.61595	2	1.578	1.531	1.369	0.662	0.628	0.736
hsa05163 Human cytomegalovirus infection	0.548809	8	1.02	P63092	8	0.162	Down	1.3942e-07	K	Guanine nucleotide-binding protein G(s) subunit alpha isoforms short OS=Homo sapiens OX=9606 GN=GNAS PE=1 SV=1	GNAS	1	0.00017262	97.463	GCLGNSK(1)TEDQR	2	-0.98053	1	2.08	2.045	1.911	0.324	0.323	0.33
hsa05163 Human cytomegalovirus infection	0.548809	8	1.02	P17252	575	0.62	Down	0.0034987	K	Protein kinase C alpha type OS=Homo sapiens OX=9606 GN=PRKCA PE=1 SV=4	PRKCA	1	0.00296928	74.92	GLMTK(1)HPAK	3	-0.94664	1	1.458	1.172	1.271	0.802	0.869	0.748
hsa05163 Human cytomegalovirus infection	0.548809	8	1.02	P06400	65	0.464	Down	0.002224	K	Retinoblastoma-associated protein OS=Homo sapiens OX=9606 GN=RB1 PE=1 SV=2	RB1	1	0.00150538	94.114	LK(1)IPDHVR	3	-0.34904	1	1.381	1.521	1.526	0.796	0.554	0.706
hsa05163 Human cytomegalovirus infection	0.548809	8	1.02	Q04206	122	0.545	Down	0.0071434	K	Transcription factor p65 OS=Homo sapiens OX=9606 GN=RELA PE=1 SV=2	RELA	1	3.64055e-22	149.32	CIHSFQNLGIQCVK(1)K	3	0.47742	1	1.382	1.379	1.378	0.794	0.785	0.676
hsa05163 Human cytomegalovirus infection	0.548809	8	1.02	Q04206	195	0.657	Down	4.2829e-05	K	Transcription factor p65 OS=Homo sapiens OX=9606 GN=RELA PE=1 SV=2	RELA	1	0.00217284	81.48	APNTAELK(1)ICR	2	-0.29332	1	1.29	1.233	1.264	0.806	0.824	0.857
hsa05163 Human cytomegalovirus infection	0.548809	8	1.02	P30101	94	0.42	Down	4.8366e-06	K	Protein disulfide-isomerase A3 OS=Homo sapiens OX=9606 GN=PDIA3 PE=1 SV=4	PDIA3	1	3.5914e-41	161.47	VDCTANTNTCNK(1)YGVSGYPTLK	4	-0.65929	5	1.559	1.492	1.558	0.681	0.625	0.63
hsa05163 Human cytomegalovirus infection	0.548809	8	1.02	P30101	415	0.45	Down	0.0022784	K	Protein disulfide-isomerase A3 OS=Homo sapiens OX=9606 GN=PDIA3 PE=1 SV=4	PDIA3	1	0.0215894	85.676	NLEPK(1)YK	3	0.15336	4	1.566	1.535	1.386	0.673	0.669	0.679
hsa05163 Human cytomegalovirus infection	0.548809	8	1.02	P30101	82	0.469	Down	4.061e-05	K	Protein disulfide-isomerase A3 OS=Homo sapiens OX=9606 GN=PDIA3 PE=1 SV=4	PDIA3	1	6.15521e-11	117.18	GIVPLAK(1)VDCTANTNTCNK	3	-0.14257	4	1.365	1.513	1.526	0.693	0.669	0.704
hsa05163 Human cytomegalovirus infection	0.548809	8	1.02	P63098	91	0.609	Down	2.1079e-05	K	Calcineurin subunit B type 1 OS=Homo sapiens OX=9606 GN=PPP3R1 PE=1 SV=2	PPP3R1	0.992001	0.0310274	51.528	GDK(0.008)EQK(0.992)LR	3	1.0201	1	1.276	1.344	1.307	0.772	0.811	0.808
hsa05163 Human cytomegalovirus infection	0.548809	8	1.02	Q14573	258	0.471	Down	3.6728e-06	K	Inositol 1,4,5-trisphosphate receptor type 3 OS=Homo sapiens OX=9606 GN=ITPR3 PE=1 SV=2	ITPR3	1	0.000333363	105.13	FLTCDEYK(1)GK	2	-1.2035	2	1.529	1.425	1.454	0.707	0.674	0.693
hsa05163 Human cytomegalovirus infection	0.548809	8	1.02	P61586	104	0.588	Down	4.1025e-05	K	Transforming protein RhoA OS=Homo sapiens OX=9606 GN=RHOA PE=1 SV=1	RHOA	1	5.97999e-08	100.02	WTPEVK(1)HFCPNVPIILVGNK	4	0.21964	2	1.315	1.323	1.356	0.779	0.749	0.819
hsa00970 Aminoacyl-tRNA biosynthesis	0.850965	5	0.74	P41250	204	0.406	Down	1.3253e-07	K	Glycine--tRNA ligase OS=Homo sapiens OX=9606 GN=GARS1 PE=1 SV=3	GARS1	1	3.43667e-07	139.32	FADFMVK(1)DVK	2	-0.26143	2	1.558	1.562	1.548	0.646	0.618	0.632
hsa00970 Aminoacyl-tRNA biosynthesis	0.850965	5	0.74	P41250	207	0.423	Down	1.99187e-05	K	Glycine--tRNA ligase OS=Homo sapiens OX=9606 GN=GARS1 PE=1 SV=3	GARS1	1	0.00098637	115.57	DVK(1)NGECFR	2	2.2355	3	1.609	1.537	1.451	0.648	0.625	0.673
hsa00970 Aminoacyl-tRNA biosynthesis	0.850965	5	0.74	P54136	30	0.431	Down	3.6386e-05	K	Arginine--tRNA ligase, cytoplasmic OS=Homo sapiens OX=9606 GN=RARS PE=1 SV=2	RARS	1	4.72399e-24	139.11	LK(1)NCGCLGASPNLEQLQEENLK	4	-1.2617	2	1.572	1.508	1.488	0.701	0.652	0.616
hsa00970 Aminoacyl-tRNA biosynthesis	0.850965	5	0.74	P54136	287	0.622	Down	6.1211e-05	K	Arginine--tRNA ligase, cytoplasmic OS=Homo sapiens OX=9606 GN=RARS PE=1 SV=2	RARS	1	0.0133665	73.499	FDTEEEFK(1)K	2	0.00052724	1	1.319	1.239	1.332	0.788	0.802	0.829
hsa00970 Aminoacyl-tRNA biosynthesis	0.850965	5	0.74	P49588	81	0.58	Down	3.631e-05	K	Alanine--tRNA ligase, cytoplasmic OS=Homo sapiens OX=9606 GN=AARS PE=1 SV=2	AARS	1	3.73629e-06	106.32	AGGK(1)HNDLDDVGK	4	0.62486	2	1.302	1.356	1.359	0.783	0.744	0.803
hsa00970 Aminoacyl-tRNA biosynthesis	0.850965	5	0.74	P49591	57	0.444	Down	1.62408e-05	K	Serine--tRNA ligase, cytoplasmic OS=Homo sapiens OX=9606 GN=SARS PE=1 SV=3	SARS	1	0.0215894	85.676	LK(1)NLCSK	3	-0.033729	2	1.478	1.56	1.469	0.645	0.699	0.657
hsa00970 Aminoacyl-tRNA biosynthesis	0.850965	5	0.74	P49591	62	0.431	Down	1.3747e-06	K	Serine--tRNA ligase, cytoplasmic OS=Homo sapiens OX=9606 GN=SARS PE=1 SV=3	SARS	1	5.52415e-06	131.69	NLCSK(1)TIGEK	2	-0.47793	2	1.508	1.556	1.499	0.672	0.663	0.632
hsa00970 Aminoacyl-tRNA biosynthesis	0.850965	5	0.74	O43776	116	0.568	Down	0.000144276	K	Asparagine--tRNA ligase, cytoplasmic OS=Homo sapiens OX=9606 GN=NARS1 PE=1 SV=1	NARS1	1	0.00242061	80.69	CVK(1)IGALEGYR	2	2.309	1	1.34	1.318	1.4	0.783	0.715	0.806
hsa00970 Aminoacyl-tRNA biosynthesis	0.850965	5	0.74	O43776	507	0.497	Down	0.0089026	K	Asparagine--tRNA ligase, cytoplasmic OS=Homo sapiens OX=9606 GN=NARS1 PE=1 SV=1	NARS1	1	4.18918e-05	92.439	K(1)YGTCPHGGYGLGLER	3	-2.0373	2	1.431	1.452	1.415	0.626	0.726	0.785
hsa03440 Homologous recombination	0.411824	2	1.48	Q92878	1291	0.388	Down	1.72987e-05	K	DNA repair protein RAD50 OS=Homo sapiens OX=9606 GN=RAD50 PE=1 SV=1	RAD50	1	1.56938e-08	143.98	K(1)NIDQCSEIVK	2	0.59487	1	1.599	1.519	1.629	0.586	0.651	0.605
hsa03440 Homologous recombination	0.411824	2	1.48	P54132	1057	0.563	Down	0.00036286	K	Bloom syndrome protein OS=Homo sapiens OX=9606 GN=BLM PE=1 SV=1	BLM	1	7.43562e-05	95.417	K(1)HPDVSCDNCCK	3	0.41417	1	1.242	1.475	1.356	0.783	0.759	0.75
hsa04723 Retrograde endocannabinoid signaling	0.852413	3	0.69	P17252	575	0.62	Down	0.0034987	K	Protein kinase C alpha type OS=Homo sapiens OX=9606 GN=PRKCA PE=1 SV=4	PRKCA	1	0.00296928	74.92	GLMTK(1)HPAK	3	-0.94664	1	1.458	1.172	1.271	0.802	0.869	0.748
hsa04723 Retrograde endocannabinoid signaling	0.852413	3	0.69	P51970	38	0.266	Down	2.3488e-06	K	NADH dehydrogenase [ubiquinone] 1 alpha subcomplex subunit 8 OS=Homo sapiens OX=9606 GN=NDUFA8 PE=1 SV=3	NDUFA8	1	0.00170306	54.09	AAAHHYGAQCDK(1)PNK	3	-0.081265	3	1.827	1.722	1.816	0.446	0.503	0.476
hsa04723 Retrograde endocannabinoid signaling	0.852413	3	0.69	Q14573	258	0.471	Down	3.6728e-06	K	Inositol 1,4,5-trisphosphate receptor type 3 OS=Homo sapiens OX=9606 GN=ITPR3 PE=1 SV=2	ITPR3	1	0.000333363	105.13	FLTCDEYK(1)GK	2	-1.2035	2	1.529	1.425	1.454	0.707	0.674	0.693
hsa05133 Pertussis	0.374653	3	1.38	Q04206	122	0.545	Down	0.0071434	K	Transcription factor p65 OS=Homo sapiens OX=9606 GN=RELA PE=1 SV=2	RELA	1	3.64055e-22	149.32	CIHSFQNLGIQCVK(1)K	3	0.47742	1	1.382	1.379	1.378	0.794	0.785	0.676
hsa05133 Pertussis	0.374653	3	1.38	Q04206	195	0.657	Down	4.2829e-05	K	Transcription factor p65 OS=Homo sapiens OX=9606 GN=RELA PE=1 SV=2	RELA	1	0.00217284	81.48	APNTAELK(1)ICR	2	-0.29332	1	1.29	1.233	1.264	0.806	0.824	0.857
hsa05133 Pertussis	0.374653	3	1.38	P23528	45	0.342	Down	2.6776e-06	K	Cofilin-1 OS=Homo sapiens OX=9606 GN=CFL1 PE=1 SV=3	CFL1	1	0.00127427	101.39	K(1)NIILEEGK	2	0.23308	5	1.734	1.655	1.576	0.555	0.587	0.557
hsa05133 Pertussis	0.374653	3	1.38	P23528	144	0.536	Down	2.1185e-06	K	Cofilin-1 OS=Homo sapiens OX=9606 GN=CFL1 PE=1 SV=3	CFL1	1	5.44334e-18	156	HELQANCYEEVK(1)DR	3	0.045666	6	1.41	1.416	1.341	0.744	0.751	0.739
hsa05133 Pertussis	0.374653	3	1.38	P23528	44	0.401	Down	1.80522e-05	K	Cofilin-1 OS=Homo sapiens OX=9606 GN=CFL1 PE=1 SV=3	CFL1	1	4.72599e-11	153.95	AVLFCLSEDK(1)K	2	-0.65835	3	1.595	1.575	1.523	0.642	0.654	0.585
hsa05133 Pertussis	0.374653	3	1.38	P23528	78	0.558	Down	0.00053507	K	Cofilin-1 OS=Homo sapiens OX=9606 GN=CFL1 PE=1 SV=3	CFL1	1	0.0261833	73.573	MLPDK(1)DCR	2	-0.9076	1	1.372	1.381	1.339	0.759	0.838	0.688
hsa05133 Pertussis	0.374653	3	1.38	P61586	104	0.588	Down	4.1025e-05	K	Transforming protein RhoA OS=Homo sapiens OX=9606 GN=RHOA PE=1 SV=1	RHOA	1	5.97999e-08	100.02	WTPEVK(1)HFCPNVPIILVGNK	4	0.21964	2	1.315	1.323	1.356	0.779	0.749	0.819
hsa05216 Thyroid cancer	0.794992	1	0.74	Q16204	81	0.338	Down	4.3748e-06	K	Coiled-coil domain-containing protein 6 OS=Homo sapiens OX=9606 GN=CCDC6 PE=1 SV=2	CCDC6	1	0.00126388	110.39	IELETYK(1)LK	3	0.58578	2	1.704	1.576	1.702	0.556	0.538	0.591
hsa00513 Various types of N-glycan biosynthesis	0.942634	1	0.41	P04843	538	0.417	Down	1.3213e-07	K	Dolichyl-diphosphooligosaccharide--protein glycosyltransferase subunit 1 OS=Homo sapiens OX=9606 GN=RPN1 PE=1 SV=1	RPN1	1	0.000596927	91.62	LK(1)TEGSDLCDR	3	-0.056382	2	1.554	1.514	1.55	0.636	0.655	0.637
hsa00190 Oxidative phosphorylation	0.944327	6	0.63	P51970	38	0.266	Down	2.3488e-06	K	NADH dehydrogenase [ubiquinone] 1 alpha subcomplex subunit 8 OS=Homo sapiens OX=9606 GN=NDUFA8 PE=1 SV=3	NDUFA8	1	0.00170306	54.09	AAAHHYGAQCDK(1)PNK	3	-0.081265	3	1.827	1.722	1.816	0.446	0.503	0.476
hsa00190 Oxidative phosphorylation	0.944327	6	0.63	P21281	109	0.48	Down	5.5611e-07	K	V-type proton ATPase subunit B, brain isoform OS=Homo sapiens OX=9606 GN=ATP6V1B2 PE=1 SV=3	ATP6V1B2	1	0.000924525	87.718	K(1)TSCEFTGDILR	3	-0.37516	3	1.482	1.45	1.439	0.716	0.687	0.694
hsa00190 Oxidative phosphorylation	0.944327	6	0.63	P21281	108	0.532	Down	0.0050152	K	V-type proton ATPase subunit B, brain isoform OS=Homo sapiens OX=9606 GN=ATP6V1B2 PE=1 SV=3	ATP6V1B2	1	1.83584e-08	108.14	AVVQVFEGTSGIDAK(1)K	3	0.31694	1	1.399	1.378	1.407	0.809	0.702	0.715
hsa00190 Oxidative phosphorylation	0.944327	6	0.63	P38606	132	0.405	Down	1.77762e-05	K	V-type proton ATPase catalytic subunit A OS=Homo sapiens OX=9606 GN=ATP6V1A PE=1 SV=2	ATP6V1A	1	0.000353207	107.09	DIK(1)WDFTPCK	2	-0.13164	2	1.639	1.537	1.502	0.652	0.641	0.6
hsa00190 Oxidative phosphorylation	0.944327	6	0.63	Q9H2U2	157	0.465	Down	0.00026148	K	Inorganic pyrophosphatase 2, mitochondrial OS=Homo sapiens OX=9606 GN=PPA2 PE=1 SV=2	PPA2	1	9.52746e-14	119.94	DK(1)STNCFGDNDPIDVCEIGSK	3	-0.37577	1	1.587	1.465	1.381	0.699	0.738	0.626
hsa00190 Oxidative phosphorylation	0.944327	6	0.63	P36543	138	0.569	Down	2.1349e-05	K	V-type proton ATPase subunit E 1 OS=Homo sapiens OX=9606 GN=ATP6V1E1 PE=1 SV=1	ATP6V1E1	1	0.01156	85.355	K(1)QDFPLVK	3	0.41354	2	1.333	1.367	1.353	0.748	0.806	0.753
hsa00190 Oxidative phosphorylation	0.944327	6	0.63	Q14061	30	0.314	Down	1.50298e-05	K	Cytochrome c oxidase copper chaperone OS=Homo sapiens OX=9606 GN=COX17 PE=1 SV=2	COX17	1	0.000242026	75.911	KPLKPCCACPETK(1)K	4	0.22637	1	1.732	1.742	1.627	0.497	0.553	0.553
hsa04260 Cardiac muscle contraction	0.969714	1	0.34	Q12797	646	0.392	Down	2.7434e-08	K	Aspartyl/asparaginyl beta-hydroxylase OS=Homo sapiens OX=9606 GN=ASPH PE=1 SV=3	ASPH	1	0.000150126	98.942	GAPK(1)TCTLLEK	3	0.49951	2	1.584	1.579	1.567	0.626	0.608	0.62
hsa05410 Hypertrophic cardiomyopathy (HCM)	0.878512	2	0.61	P63261	291	0.532	Down	4.2125e-05	K	Actin, cytoplasmic 2 OS=Homo sapiens OX=9606 GN=ACTG1 PE=1 SV=1	ACTG1	1	1.10521e-10	103.84	K(1)DLYANTVLSGGTTMYPGIADR	2	0.54304	5	1.347	1.356	1.477	0.746	0.756	0.72
hsa05410 Hypertrophic cardiomyopathy (HCM)	0.878512	2	0.61	P16144	834	0.349	Down	1.481e-06	K	Integrin beta-4 OS=Homo sapiens OX=9606 GN=ITGB4 PE=1 SV=5	ITGB4	1	1.56452e-06	115.12	LCTENLLK(1)PDTR	3	-0.48166	2	1.603	1.662	1.661	0.6	0.55	0.57
hsa00980 Metabolism of xenobiotics by cytochrome P450	0.729056	3	0.85	P11766	107	0.231	Down	3.6245e-05	K	Alcohol dehydrogenase class-3 OS=Homo sapiens OX=9606 GN=ADH5 PE=1 SV=4	ADH5	1	1.45045e-06	115.57	FCLNPK(1)TNLCQK	2	0.14803	1	2	1.774	1.804	0.398	0.407	0.482
hsa00980 Metabolism of xenobiotics by cytochrome P450	0.729056	3	0.85	P16152	148	0.562	Down	3.0696e-06	K	Carbonyl reductase [NADPH] 1 OS=Homo sapiens OX=9606 GN=CBR1 PE=1 SV=3	CBR1	1	1.16643e-09	133.16	ALK(1)SCSPELQQK	2	0.15889	2	1.322	1.372	1.382	0.781	0.749	0.762
[truncated: 1,112 more rows]

## Sheet: all
KEGG pathway	Mapping	Background	All Mapping	All Background	Fold enrichment	Fisher's exact test p value	-log10(p value)	Related proteins
[truncated: 13 more rows]

## Sheet: all Pathway2Protein
KEGG pathway	Fisher's exact test p value	Mapping	Fold enrichment	Protein accession	Position	Ratio	Regulated Type	P value	Amino acid	Protein description	Gene name	Localization probability	PEP	Score	Modified sequence	Charge	Mass error [ppm]	MS/MS Count	MKN_45C1	MKN_45C2	MKN_45C3	MKN_45S1	MKN_45S2	MKN_45S3
[truncated: 2,655 more rows]
