# Supplementary material for: Differential expression of lysine acetylation proteins in gastric cancer treated with a new antitumor agent bioactive peptide chelate selenium
Source: PeerJ. 2023 Jan 17;11:e14384. doi: 10.7717/peerj.14384 (PMC9854375; doi:10.7717/peerj.14384)
Supplement: Table S4 [file peerj-11-14384-s004.xlsx]

## Sheet: Q1
GO Terms Level 1	GO Terms Description	GO Terms Level	GO Terms ID	Mapping	Background	All Mapping	All Background	Fold Enrichment	Fisher' exact test P value	-log10(p value)	Related Protein
Cellular Component	extracellular matrix	4	GO:0031012	24	95	272	1894	1.76	0.00278471	2.56	P15924 Q15149 Q00839 P04843 P40227 P61247 P62913 P23246 P78527 P62826 Q9UQE7 P21333 P60866 P13639 P35579 P23528 Q06830 P17844 P40939 P61353 P52272 P07237 P14618 P62701
	membrane region	4	GO:0098589	15	51	272	1894	2.05	0.0037861	2.42	O14980 Q9ULV4 P13639 P50570 P50454 P18206 P49792 Q9UNF0 Q99497 Q9UM54 Q9NZM1 P00558 P10644 P13861 P35221
	cell cortex	9	GO:0005938	13	43	272	1894	2.11	0.00533732	2.27	P21333 Q12797 P35579 P18206 Q14155 P19338 P60981 Q14847 Q14980 Q9UM54 P43034 Q9BZF1 Q16181
	nuclear envelope	10	GO:0005635	22	89	272	1894	1.72	0.0055334	2.26	P23921 O14980 O00299 P11717 Q8NC56 P49792 Q9NUU7 Q9Y3I0 Q9UM54 P62826 Q9BZF1 Q9GZV4 Q9BZE4 P42166 P43487 Q9P0L0 P55735 P49903 P63279 Q9NZM1 P43034 Q14573
	membrane microdomain	5	GO:0098857	11	35	272	1894	2.19	0.00739973	2.13	Q9ULV4 P13639 P50454 P18206 Q9UNF0 Q99497 Q9NZM1 P00558 P10644 P35221 P13861
	membrane raft	6	GO:0045121	11	35	272	1894	2.19	0.00739973	2.13	Q9ULV4 P13639 P50454 P18206 Q9UNF0 Q99497 Q9NZM1 P00558 P10644 P35221 P13861
	cell-substrate junction	3	GO:0030055	32	148	272	1894	1.51	0.00826868	2.08	P61158 Q15149 P48059 P11717 Q07020 Q7L576 P18206 Q14155 P16144 O00151 Q9UNF0 P61247 P30101 P84098 Q9Y490 P62937 O60504 P21333 Q9ULV4 P35579 P23528 Q9UGI8 P50395 P50570 P39023 Q14847 P61353 P07237 P13861 P35221 P62701 Q8WUM4
	cell leading edge	4	GO:0031252	18	72	272	1894	1.74	0.0104082	1.98	P61158 Q13576 Q7L576 Q14155 P16144 Q9UNF0 P21281 Q9UM54 P07900 Q9Y490 Q9ULV4 P35579 P23528 O60716 P50570 Q8IZ21 P43034 P35221
Molecular Function	actin filament binding	6	GO:0051015	16	35	273	1880	3.15	7.72032e-06	5.11	Q13576 Q7L576 P18206 Q92614 P60981 P47756 Q9UM54 Q9Y490 P21333 Q9ULV4 P35579 P23528 P13639 Q14847 P13797 P35221
	acetyl-CoA C-acyltransferase activity	7	GO:0003988	4	4	273	1880	6.89	0.000436335	3.36	P55084 P24752 P42765 P40939
	vinculin binding	5	GO:0017166	4	5	273	1880	5.51	0.00193141	2.71	Q9Y3I0 Q9Y490 P35221 O60504
	cell adhesion molecule binding	4	GO:0050839	42	190	273	1880	1.52	0.00194782	2.71	P04075 Q15149 P18206 P47756 Q9UM54 P62826 Q16181 O95292 P62820 P37802 P13639 P35579 Q15365 O60716 Q9UHX1 P42166 P43487 P06733 Q7Z2W4 P07237 P35221 P14618 P15924 P54136 O00299 Q96TA1 O00151 Q9UNF0 Q92616 Q9H0B6 Q9Y490 Q9NTK5 Q00341 P21333 Q9UGI8 Q06830 Q06124 Q9P0L0 Q99497 P08238 Q14847 Q9H3U1
	cadherin binding	5	GO:0045296	39	174	273	1880	1.54	0.00218198	2.66	P04075 Q15149 P18206 P47756 Q9UM54 P62826 Q16181 O95292 P62820 P37802 P13639 P35579 Q15365 O60716 Q9UHX1 P42166 P43487 P06733 Q7Z2W4 P35221 P14618 O00299 P54136 Q96TA1 O00151 Q9UNF0 Q92616 Q9H0B6 Q9Y490 Q9NTK5 Q00341 P21333 Q9UGI8 Q06830 Q9P0L0 Q99497 P08238 Q14847 Q9H3U1
	cAMP-dependent protein kinase inhibitor activity	8	GO:0004862	3	3	273	1880	6.89	0.00303334	2.52	P10644 P13861 Q9UD71
	macromolecular complex binding	3	GO:0044877	40	183	273	1880	1.51	0.0031424	2.5	Q7L576 Q5SSJ5 P18206 Q92614 P84243 P09234 P47756 Q9UM54 P62826 Q9UQE7 Q13838 O75367 Q9GZV4 P13639 P23528 P35579 P50570 P50454 P51970 P07237 P35221 P14618 Q9BXJ9 Q13576 P60981 Q92616 P07900 Q9Y490 P21333 P63092 Q9ULV4 Q9Y3A5 Q06124 P17844 P40939 Q8TEQ6 P08238 Q14847 P13797 P43034
	protein serine/threonine kinase inhibitor activity	7	GO:0030291	4	6	273	1880	4.59	0.00513287	2.29	O75367 P10644 P13861 Q9UD71
Biological Process	meiotic cell cycle process	6	GO:1903046	10	20	269	1855	3.45	0.000168688	3.77	Q08J23 P61158 Q02880 P35579 Q8NC56 O95347 Q92878 P46013 P10644 Q9UQE7
	homotypic cell-cell adhesion	6	GO:0034109	7	14	269	1855	3.45	0.00172153	2.76	P21333 P15924 O00299 P63092 P35579 Q9Y490 P18206
	actin cytoskeleton organization	6	GO:0030036	20	71	269	1855	1.94	0.00173663	2.76	P61158 P04075 Q13576 Q92614 Q9UNF0 P60981 P47756 Q9Y490 P62826 O60504 P21333 Q9ULV4 P35579 P23528 Q8IZ21 P13797 P10644 P43034 P35221 Q8WUM4
	meiotic nuclear division	7	GO:0007126	8	18	269	1855	3.06	0.00206234	2.69	P61158 Q02880 Q8NC56 O95347 Q92878 P46013 P10644 Q9UQE7
	glycerophospholipid metabolic process	7	GO:0006650	10	27	269	1855	2.55	0.00299831	2.52	Q9Y365 Q06124 P40939 Q9NQZ5 P55084 Q01469 O95861 Q8TBX8 Q9BZF1 P43034
	ketone body biosynthetic process	6	GO:0046951	3	3	269	1855	6.9	0.00302043	2.52	P54868 P24752 P35914
	stem cell development	7	GO:0048864	3	3	269	1855	6.9	0.00302043	2.52	Q9ULV4 Q8IZ21 P48436
	negative regulation of cell motility	7	GO:2000146	9	24	269	1855	2.59	0.00439933	2.36	Q9ULV4 P23528 P18206 Q9BZE4 Q9Y3F4 P09429 O43291 Q9BZF1 P35221
	hair cycle process	6	GO:0022405	5	9	269	1855	3.83	0.0047294	2.33	Q08J23 P63092 Q15738 P48436 Q13547
	platelet activation	7	GO:0030168	8	21	269	1855	2.63	0.0064591	2.19	P21333 O00299 P63092 P35579 P18206 Q06124 Q9Y490 Q14573
	cell development	6	GO:0048468	32	145	269	1855	1.52	0.00691861	2.16	P09622 Q7L576 P18206 Q02218 Q8NI27 P84243 Q9UMN6 O43291 P62826 P62820 P35579 P06400 P50570 P50454 Q13951 P10644 P35221 Q08J23 P61964 P09429 P78527 P21333 Q9ULV4 P48436 Q02880 Q9Y4W6 Q06124 Q9Y4C1 Q9P0L0 Q8IZ21 P55145 P43034
	blood coagulation	6	GO:0007596	14	49	269	1855	1.97	0.00740016	2.13	P21333 O00299 P63092 P35579 P18206 Q06124 P84243 P47756 Q13547 Q9Y490 Q71DI3 P10644 P13861 Q14573
	negative regulation of cellular component movement	6	GO:0051271	9	26	269	1855	2.39	0.00806246	2.09	Q9ULV4 P23528 P18206 Q9BZE4 Q9Y3F4 P09429 O43291 Q9BZF1 P35221
	glycerolipid metabolic process	6	GO:0046486	10	31	269	1855	2.22	0.00922996	2.03	Q9Y365 Q06124 P40939 Q9NQZ5 P55084 Q01469 O95861 Q8TBX8 Q9BZF1 P43034

## Sheet: Q1 GO2Protein
GO Terms Level 1	GO Terms ID	GO Terms Level	GO Terms Description	Fisher's exact test P value	Protein accession	Position	Ratio	Regulated Type	Amino acid	Protein description	Gene name	Localization probability	PEP	Score	Modified sequence	Charge	Mass error [ppm]	MS/MS Count	MKN_45C1	MKN_45C2	MKN_45C3	MKN_45S1	MKN_45S2	MKN_45S3	MKN_45S/MKN_45C Ratio	MKN_45S/MKN_45C P value
Cellular Component	GO:0045334	11	clathrin-coated endocytic vesicle	0.322564	P50570	90	0.247	Q1	K	Dynamin-2 OS=Homo sapiens OX=9606 GN=DNM2 PE=1 SV=2	DNM2	1	0.007979	78.342	K(1)FTDFDEVR	2	-0.55845	1	1.768	1.787	1.917	0.504	0.415	0.435	0.247	2.2772e-05
Cellular Component	GO:0045334	11	clathrin-coated endocytic vesicle	0.322564	Q10567	139	0.443	Q1	K	AP-1 complex subunit beta-1 OS=Homo sapiens OX=9606 GN=AP1B1 PE=1 SV=2	AP1B1	1	0.00150016	107.06	K(1)TAAVCVAK	3	1.9188	2	1.575	1.526	1.416	0.656	0.666	0.677	0.443	1.78498e-05
Cellular Component	GO:0099568	8	cytoplasmic region	0.0371152	P21333	578	0.272	Q1	K	Filamin-A OS=Homo sapiens OX=9606 GN=FLNA PE=1 SV=4	FLNA	1	0.000120036	101.56	VGTECGNQK(1)VR	2	-0.21816	1	1.73	1.815	1.784	0.486	0.476	0.485	0.272	6.0056e-08
Cellular Component	GO:0099568	8	cytoplasmic region	0.0371152	P21333	2000	0.359	Q1	K	Filamin-A OS=Homo sapiens OX=9606 GN=FLNA PE=1 SV=4	FLNA	1	0.0408648	66.692	EEPCLLK(1)R	2	-0.50213	1	1.675	1.62	1.586	0.582	0.588	0.583	0.359	1.8799e-07
Cellular Component	GO:0099568	8	cytoplasmic region	0.0371152	P21333	1450	0.495	Q1	K	Filamin-A OS=Homo sapiens OX=9606 GN=FLNA PE=1 SV=4	FLNA	1	0.00011233	90.793	VPVHDVTDASK(1)VK	3	0.48724	1	1.479	1.441	1.393	0.691	0.679	0.764	0.495	6.2437e-05
Cellular Component	GO:0099568	8	cytoplasmic region	0.0371152	Q12797	646	0.392	Q1	K	Aspartyl/asparaginyl beta-hydroxylase OS=Homo sapiens OX=9606 GN=ASPH PE=1 SV=3	ASPH	1	0.000150126	98.942	GAPK(1)TCTLLEK	3	0.49951	2	1.584	1.579	1.567	0.626	0.608	0.62	0.392	2.7434e-08
Cellular Component	GO:0099568	8	cytoplasmic region	0.0371152	P35579	180	0.355	Q1	K	Myosin-9 OS=Homo sapiens OX=9606 GN=MYH9 PE=1 SV=4	MYH9	1	5.30441e-22	143.04	EDQSILCTGESGAGK(1)TENTK	3	-0.56027	1	1.567	1.76	1.57	0.594	0.577	0.566	0.355	1.72257e-05
Cellular Component	GO:0099568	8	cytoplasmic region	0.0371152	P35579	565	0.403	Q1	K	Myosin-9 OS=Homo sapiens OX=9606 GN=MYH9 PE=1 SV=4	MYH9	1	0.00243053	54.898	DK(1)ADFCIIHYAGK	3	-0.65742	1	1.575	1.478	1.63	0.589	0.674	0.622	0.403	4.3735e-05
Cellular Component	GO:0099568	8	cytoplasmic region	0.0371152	P18206	316	0.374	Q1	K	Vinculin OS=Homo sapiens OX=9606 GN=VCL PE=1 SV=4	VCL	1	0.0100094	72.34	VGELCAGK(1)ER	2	-1.6995	1	1.722	1.618	1.478	0.627	0.582	0.593	0.374	3.9318e-05
Cellular Component	GO:0099568	8	cytoplasmic region	0.0371152	Q14155	725	0.484	Q1	K	Rho guanine nucleotide exchange factor 7 OS=Homo sapiens OX=9606 GN=ARHGEF7 PE=1 SV=2	ARHGEF7	1	0.00865446	62.162	VIEAYCTSAK(1)TR	2	1.6091	1	1.645	1.352	1.365	0.703	0.725	0.683	0.484	0.00039998
Cellular Component	GO:0099568	8	cytoplasmic region	0.0371152	P19338	545	0.498	Q1	K	Nucleolin OS=Homo sapiens OX=9606 GN=NCL PE=1 SV=3	NCL	1	4.9615e-05	136.49	EALNSCNK(1)R	3	0.17238	5	1.466	1.461	1.376	0.712	0.722	0.709	0.498	2.6011e-06
Cellular Component	GO:0099568	8	cytoplasmic region	0.0371152	P60981	30	0.396	Q1	K	Destrin OS=Homo sapiens OX=9606 GN=DSTN PE=1 SV=3	DSTN	1	0.00172616	93.096	CSTPEEIK(1)K	3	-1.0849	3	1.589	1.587	1.536	0.613	0.602	0.649	0.396	1.6318e-06
Cellular Component	GO:0099568	8	cytoplasmic region	0.0371152	Q14847	50	0.459	Q1	K	LIM and SH3 domain protein 1 OS=Homo sapiens OX=9606 GN=LASP1 PE=1 SV=2	LASP1	1	0.010633	57.785	K(1)PYCNAHYPK	3	-0.53436	2	1.432	1.49	1.529	0.706	0.675	0.66	0.459	4.5956e-06
Cellular Component	GO:0099568	8	cytoplasmic region	0.0371152	Q14980	73	0.492	Q1	K	Nuclear mitotic apparatus protein 1 OS=Homo sapiens OX=9606 GN=NUMA1 PE=1 SV=2	NUMA1	1	0.000365798	79.652	K(1)HPSSPECLVSAQK	3	-1.1446	1	1.499	1.405	1.421	0.698	0.705	0.725	0.492	3.285e-06
Cellular Component	GO:0099568	8	cytoplasmic region	0.0371152	Q14980	303	0.293	Q1	K	Nuclear mitotic apparatus protein 1 OS=Homo sapiens OX=9606 GN=NUMA1 PE=1 SV=2	NUMA1	1	3.57606e-05	134.13	QCQDLK(1)TEK	2	0.098392	2	1.777	1.74	1.697	0.489	0.495	0.545	0.293	2.4028e-06
Cellular Component	GO:0099568	8	cytoplasmic region	0.0371152	Q9UM54	240	0.316	Q1	K	Unconventional myosin-VI OS=Homo sapiens OX=9606 GN=MYO6 PE=1 SV=4	MYO6	1	0.0165223	70.056	ICVQGK(1)EER	2	-0.27571	1	1.747	1.741	1.607	0.539	0.568	0.505	0.316	1.61137e-05
Cellular Component	GO:0099568	8	cytoplasmic region	0.0371152	Q9UM54	325	0.466	Q1	K	Unconventional myosin-VI OS=Homo sapiens OX=9606 GN=MYO6 PE=1 SV=4	MYO6	1	0.0271518	81.296	MCTAMK(1)K	2	-0.14267	1	1.465	1.483	1.477	0.704	0.711	0.646	0.466	0.00160093
Cellular Component	GO:0099568	8	cytoplasmic region	0.0371152	P43034	360	0.433	Q1	K	Platelet-activating factor acetylhydrolase IB subunit alpha OS=Homo sapiens OX=9606 GN=PAFAH1B1 PE=1 SV=2	PAFAH1B1	1	0.00320332	72.705	FILSCADDK(1)TLR	2	0.75147	1	1.351	1.606	1.584	0.52	0.74	0.704	0.433	0.0023609
Cellular Component	GO:0099568	8	cytoplasmic region	0.0371152	Q9BZF1	723	0.308	Q1	K	Oxysterol-binding protein-related protein 8 OS=Homo sapiens OX=9606 GN=OSBPL8 PE=1 SV=3	OSBPL8	1	0.00193928	91.961	TK(1)NEEWSCK	2	-0.38205	1	1.813	1.677	1.649	0.554	0.493	0.537	0.308	1.66199e-05
Cellular Component	GO:0099568	8	cytoplasmic region	0.0371152	Q16181	208	0.405	Q1	K	Septin-7 OS=Homo sapiens OX=9606 GN=SEPTIN7 PE=1 SV=2	SEPTIN7	1	6.18208e-46	200.19	ADTLTPEECQQFK(1)K	2	0.48685	5	1.584	1.532	1.557	0.624	0.625	0.642	0.405	1.4162e-07
Cellular Component	GO:0032588	12	trans-Golgi network membrane	0.163022	P63092	8	0.162	Q1	K	Guanine nucleotide-binding protein G(s) subunit alpha isoforms short OS=Homo sapiens OX=9606 GN=GNAS PE=1 SV=1	GNAS	1	0.00017262	97.463	GCLGNSK(1)TEDQR	2	-0.98053	1	2.08	2.045	1.911	0.324	0.323	0.33	0.162	1.3942e-07
Cellular Component	GO:0032588	12	trans-Golgi network membrane	0.163022	P11717	1285	0.431	Q1	K	Cation-independent mannose-6-phosphate receptor OS=Homo sapiens OX=9606 GN=IGF2R PE=1 SV=3	IGF2R	1	0.0187544	68.657	VVSSCQEK(1)R	2	-1.3987	1	1.571	1.542	1.451	0.618	0.683	0.664	0.431	2.2521e-05
Cellular Component	GO:0032588	12	trans-Golgi network membrane	0.163022	Q10567	139	0.443	Q1	K	AP-1 complex subunit beta-1 OS=Homo sapiens OX=9606 GN=AP1B1 PE=1 SV=2	AP1B1	1	0.00150016	107.06	K(1)TAAVCVAK	3	1.9188	2	1.575	1.526	1.416	0.656	0.666	0.677	0.443	1.78498e-05
Cellular Component	GO:0098858	5	actin-based cell projection	0.102747	Q13576	553	0.379	Q1	K	Ras GTPase-activating-like protein IQGAP2 OS=Homo sapiens OX=9606 GN=IQGAP2 PE=1 SV=4	IQGAP2	1	0.00516444	78.324	K(1)SSDILSVLK	2	-0.62996	1	1.562	1.607	1.618	0.612	0.547	0.655	0.379	5.7146e-05
Cellular Component	GO:0098858	5	actin-based cell projection	0.102747	Q13576	273	0.384	Q1	K	Ras GTPase-activating-like protein IQGAP2 OS=Homo sapiens OX=9606 GN=IQGAP2 PE=1 SV=4	IQGAP2	1	0.00160054	85.163	LK(1)NSCISEEER	2	-0.32659	1	1.651	1.654	1.463	0.624	0.568	0.638	0.384	5.9778e-05
Cellular Component	GO:0098858	5	actin-based cell projection	0.102747	Q13576	1454	0.478	Q1	K	Ras GTPase-activating-like protein IQGAP2 OS=Homo sapiens OX=9606 GN=IQGAP2 PE=1 SV=4	IQGAP2	1	0.0105865	86.882	TCLDNLK(1)R	2	-0.99215	1	1.5	1.459	1.416	0.707	0.68	0.706	0.478	1.9511e-06
Cellular Component	GO:0098858	5	actin-based cell projection	0.102747	P23528	45	0.342	Q1	K	Cofilin-1 OS=Homo sapiens OX=9606 GN=CFL1 PE=1 SV=3	CFL1	1	0.00127427	101.39	K(1)NIILEEGK	2	0.23308	5	1.734	1.655	1.576	0.555	0.587	0.557	0.342	2.6776e-06
Cellular Component	GO:0098858	5	actin-based cell projection	0.102747	P23528	44	0.401	Q1	K	Cofilin-1 OS=Homo sapiens OX=9606 GN=CFL1 PE=1 SV=3	CFL1	1	4.72599e-11	153.95	AVLFCLSEDK(1)K	2	-0.65835	3	1.595	1.575	1.523	0.642	0.654	0.585	0.401	1.80522e-05
Cellular Component	GO:0098858	5	actin-based cell projection	0.102747	P38606	132	0.405	Q1	K	V-type proton ATPase catalytic subunit A OS=Homo sapiens OX=9606 GN=ATP6V1A PE=1 SV=2	ATP6V1A	1	0.000353207	107.09	DIK(1)WDFTPCK	2	-0.13164	2	1.639	1.537	1.502	0.652	0.641	0.6	0.405	1.77762e-05
Cellular Component	GO:0098858	5	actin-based cell projection	0.102747	P21281	109	0.48	Q1	K	V-type proton ATPase subunit B, brain isoform OS=Homo sapiens OX=9606 GN=ATP6V1B2 PE=1 SV=3	ATP6V1B2	1	0.000924525	87.718	K(1)TSCEFTGDILR	3	-0.37516	3	1.482	1.45	1.439	0.716	0.687	0.694	0.48	5.5611e-07
Cellular Component	GO:0098858	5	actin-based cell projection	0.102747	Q9UM54	240	0.316	Q1	K	Unconventional myosin-VI OS=Homo sapiens OX=9606 GN=MYO6 PE=1 SV=4	MYO6	1	0.0165223	70.056	ICVQGK(1)EER	2	-0.27571	1	1.747	1.741	1.607	0.539	0.568	0.505	0.316	1.61137e-05
Cellular Component	GO:0098858	5	actin-based cell projection	0.102747	Q9UM54	325	0.466	Q1	K	Unconventional myosin-VI OS=Homo sapiens OX=9606 GN=MYO6 PE=1 SV=4	MYO6	1	0.0271518	81.296	MCTAMK(1)K	2	-0.14267	1	1.465	1.483	1.477	0.704	0.711	0.646	0.466	0.00160093
Cellular Component	GO:0098858	5	actin-based cell projection	0.102747	Q7L576	516	0.465	Q1	K	Cytoplasmic FMR1-interacting protein 1 OS=Homo sapiens OX=9606 GN=CYFIP1 PE=1 SV=1	CYFIP1	1	2.47216e-06	84.107	K(1)TVCDWETGHEPFNDPALR	3	0.46049	1	1.526	1.529	1.372	0.613	0.778	0.666	0.465	0.00060253
Cellular Component	GO:0098858	5	actin-based cell projection	0.102747	Q9Y365	221	0.458	Q1	K	START domain-containing protein 10 OS=Homo sapiens OX=9606 GN=STARD10 PE=1 SV=2	STARD10	1	0.0014322	104.22	ACLK(1)YPEWK	3	-0.41171	2	1.467	1.532	1.456	0.701	0.691	0.647	0.458	1.58852e-05
Cellular Component	GO:0098858	5	actin-based cell projection	0.102747	P43034	360	0.433	Q1	K	Platelet-activating factor acetylhydrolase IB subunit alpha OS=Homo sapiens OX=9606 GN=PAFAH1B1 PE=1 SV=2	PAFAH1B1	1	0.00320332	72.705	FILSCADDK(1)TLR	2	0.75147	1	1.351	1.606	1.584	0.52	0.74	0.704	0.433	0.0023609
Cellular Component	GO:0014704	5	intercalated disc	0.127008	P15924	2778	0.393	Q1	K	Desmoplakin OS=Homo sapiens OX=9606 GN=DSP PE=1 SV=3	DSP	1	0.00540315	95.775	ILTCPK(1)TK	3	0.28722	2	1.629	1.493	1.603	0.599	0.624	0.634	0.393	3.948e-06
Cellular Component	GO:0014704	5	intercalated disc	0.127008	P15924	1144	0.478	Q1	K	Desmoplakin OS=Homo sapiens OX=9606 GN=DSP PE=1 SV=3	DSP	1	0.00870934	73.881	NDYDQLQK(1)AR	2	0.6607	1	1.452	1.523	1.398	0.634	0.744	0.711	0.478	0.000159996
Cellular Component	GO:0014704	5	intercalated disc	0.127008	P15924	1073	0.268	Q1	K	Desmoplakin OS=Homo sapiens OX=9606 GN=DSP PE=1 SV=3	DSP	1	0.00126733	75.102	YQAECSQFK(1)AK	2	-0.57564	2	1.782	1.777	1.795	0.487	0.466	0.48	0.268	3.1201e-08
Cellular Component	GO:0014704	5	intercalated disc	0.127008	P15924	478	0.411	Q1	K	Desmoplakin OS=Homo sapiens OX=9606 GN=DSP PE=1 SV=3	DSP	1	0.000142635	91.961	IVHK(1)GDECILK	3	0.58642	1	1.575	1.541	1.528	0.623	0.661	0.627	0.411	9.0198e-07
Cellular Component	GO:0014704	5	intercalated disc	0.127008	P18206	316	0.374	Q1	K	Vinculin OS=Homo sapiens OX=9606 GN=VCL PE=1 SV=4	VCL	1	0.0100094	72.34	VGELCAGK(1)ER	2	-1.6995	1	1.722	1.618	1.478	0.627	0.582	0.593	0.374	3.9318e-05
Cellular Component	GO:0014704	5	intercalated disc	0.127008	P35221	120	0.488	Q1	K	Catenin alpha-1 OS=Homo sapiens OX=9606 GN=CTNNA1 PE=1 SV=1	CTNNA1	1	5.50199e-08	107.82	AAAGEFADDPCSSVK(1)R	2	-0.12176	1	1.365	1.42	1.547	0.7	0.659	0.755	0.488	0.000182432
Cellular Component	GO:0002199	4	zona pellucida receptor complex	0.265507	P49368	44	0.396	Q1	K	T-complex protein 1 subunit gamma OS=Homo sapiens OX=9606 GN=CCT3 PE=1 SV=4	CCT3	1	0.00961247	68.515	TCLGPK(1)SMMK	3	-1.6047	3	1.529	1.536	1.644	0.644	0.607	0.613	0.396	3.166e-06
Cellular Component	GO:0002199	4	zona pellucida receptor complex	0.265507	P50991	292	0.438	Q1	K	T-complex protein 1 subunit delta OS=Homo sapiens OX=9606 GN=CCT4 PE=1 SV=4	CCT4	1	1.33037e-06	131.06	K(1)TGCNVLLIQK	2	-1.0315	3	1.553	1.521	1.461	0.65	0.647	0.688	0.438	3.2357e-06
Cellular Component	GO:0101002	11	ficolin-1-rich granule	0.0132058	P04075	140	0.462	Q1	K	Fructose-bisphosphate aldolase A OS=Homo sapiens OX=9606 GN=ALDOA PE=1 SV=2	ALDOA	1	0.0246193	73.499	K(1)DGADFAK	3	0.18494	2	1.579	1.444	1.418	0.69	0.684	0.679	0.462	0.00189588
Cellular Component	GO:0101002	11	ficolin-1-rich granule	0.0132058	P13639	571	0.45	Q1	K	Elongation factor 2 OS=Homo sapiens OX=9606 GN=EEF2 PE=1 SV=4	EEF2	1	3.14699e-17	154.28	DLEEDHACIPIK(1)K	2	-0.69618	3	1.467	1.535	1.479	0.652	0.65	0.715	0.45	1.99925e-05
Cellular Component	GO:0101002	11	ficolin-1-rich granule	0.0132058	P13639	594	0.491	Q1	K	Elongation factor 2 OS=Homo sapiens OX=9606 GN=EEF2 PE=1 SV=4	EEF2	1	1.69803e-09	110.12	ETVSEESNVLCLSK(1)SPNK	3	-0.52971	1	1.437	1.587	1.307	0.754	0.662	0.709	0.491	0.00046028
Cellular Component	GO:0101002	11	ficolin-1-rich granule	0.0132058	Q15008	349	0.366	Q1	K	26S proteasome non-ATPase regulatory subunit 6 OS=Homo sapiens OX=9606 GN=PSMD6 PE=1 SV=1	PSMD6	1	2.45272e-05	93.226	IDK(1)VNEIVETNRPDSK	4	0.090022	2	1.596	1.624	1.626	0.576	0.6	0.598	0.366	1.2631e-07
Cellular Component	GO:0101002	11	ficolin-1-rich granule	0.0132058	Q86VP6	1156	0.274	Q1	K	Cullin-associated NEDD8-dissociated protein 1 OS=Homo sapiens OX=9606 GN=CAND1 PE=1 SV=2	CAND1	1	0.0029114	109.66	ATCTTK(1)VK	2	-0.76433	1	1.718	1.882	1.712	0.446	0.471	0.538	0.274	3.721e-05
Cellular Component	GO:0101002	11	ficolin-1-rich granule	0.0132058	P18206	316	0.374	Q1	K	Vinculin OS=Homo sapiens OX=9606 GN=VCL PE=1 SV=4	VCL	1	0.0100094	72.34	VGELCAGK(1)ER	2	-1.6995	1	1.722	1.618	1.478	0.627	0.582	0.593	0.374	3.9318e-05
Cellular Component	GO:0101002	11	ficolin-1-rich granule	0.0132058	P12268	242	0.477	Q1	K	Inosine-5'-monophosphate dehydrogenase 2 OS=Homo sapiens OX=9606 GN=IMPDH2 PE=1 SV=2	IMPDH2	1	7.99619e-10	116.13	K(1)QLLCGAAIGTHEDDKYR	4	-0.11491	2	1.559	1.417	1.411	0.705	0.718	0.668	0.477	4.2938e-05
Cellular Component	GO:0101002	11	ficolin-1-rich granule	0.0132058	P08238	559	0.479	Q1	K	Heat shock protein HSP 90-beta OS=Homo sapiens OX=9606 GN=HSP90AB1 PE=1 SV=4	HSP90AB1	1	0.00072324	111.17	AK(1)FENLCK	3	-0.027707	2	1.508	1.469	1.398	0.714	0.677	0.704	0.479	1.56421e-05
Cellular Component	GO:0101002	11	ficolin-1-rich granule	0.0132058	P08238	568	0.153	Q1	K	Heat shock protein HSP 90-beta OS=Homo sapiens OX=9606 GN=HSP90AB1 PE=1 SV=4	HSP90AB1	1	0.0129056	82.417	LMK(1)EILDK	2	-0.52759	1	2.117	2.005	1.986	0.335	0.306	0.291	0.153	1.0451e-06
Cellular Component	GO:0101002	11	ficolin-1-rich granule	0.0132058	O00231	295	0.478	Q1	K	26S proteasome non-ATPase regulatory subunit 11 OS=Homo sapiens OX=9606 GN=PSMD11 PE=1 SV=3	PSMD11	1	0.001407	96.342	CVAQASK(1)NR	2	-0.83892	1	1.327	1.442	1.601	0.681	0.715	0.692	0.478	0.000198007
Cellular Component	GO:0101002	11	ficolin-1-rich granule	0.0132058	P09429	50	0.498	Q1	K	High mobility group protein B1 OS=Homo sapiens OX=9606 GN=HMGB1 PE=1 SV=3	HMGB1	1	0.0185525	64.567	WK(1)TMSAK	3	-0.52405	1	1.515	1.361	1.429	0.766	0.686	0.694	0.498	0.000119089
Cellular Component	GO:0101002	11	ficolin-1-rich granule	0.0132058	Q7Z6Z7	476	0.494	Q1	K	E3 ubiquitin-protein ligase HUWE1 OS=Homo sapiens OX=9606 GN=HUWE1 PE=1 SV=3	HUWE1	1	0.00238767	90.15	ECPFVIK(1)PK	3	-0.18576	2	1.503	1.397	1.415	0.66	0.686	0.785	0.494	0.00024261
Cellular Component	GO:0101002	11	ficolin-1-rich granule	0.0132058	Q9UBR2	166	0.449	Q1	K	Cathepsin Z OS=Homo sapiens OX=9606 GN=CTSZ PE=1 SV=1	CTSZ	1	0.000205059	60.764	DQECDK(1)FNQCGTCNEFK	3	-1.2451	1	1.478	1.62	1.39	0.638	0.761	0.617	0.449	0.00052197
Cellular Component	GO:0101002	11	ficolin-1-rich granule	0.0132058	P07900	576	0.235	Q1	K	Heat shock protein HSP 90-alpha OS=Homo sapiens OX=9606 GN=HSP90AA1 PE=1 SV=5	HSP90AA1	1	0.00316475	93.096	IMK(1)DILEK	3	0.51489	4	1.881	1.876	1.791	0.418	0.456	0.43	0.235	5.6281e-07
Cellular Component	GO:0101002	11	ficolin-1-rich granule	0.0132058	P17980	125	0.237	Q1	K	26S proteasome regulatory subunit 6A OS=Homo sapiens OX=9606 GN=PSMC3 PE=1 SV=3	PSMC3	1	0.00143165	104.05	CAVIK(1)TSTR	2	-2.0264	1	1.899	1.947	1.692	0.467	0.463	0.384	0.237	4.4152e-05
Cellular Component	GO:0101002	11	ficolin-1-rich granule	0.0132058	P17980	245	0.411	Q1	K	26S proteasome regulatory subunit 6A OS=Homo sapiens OX=9606 GN=PSMC3 PE=1 SV=3	PSMC3	1	1.931e-13	150.11	ACAAQTK(1)ATFLK	2	0.060852	2	1.561	1.511	1.576	0.622	0.649	0.638	0.411	4.732e-07
Cellular Component	GO:0101002	11	ficolin-1-rich granule	0.0132058	P14618	162	0.464	Q1	K	Pyruvate kinase PKM OS=Homo sapiens OX=9606 GN=PKM PE=1 SV=4	PKM	1	6.49953e-05	90.725	CDENILWLDYK(1)NICK	3	-0.11353	1	1.459	1.39	1.578	0.656	0.756	0.643	0.464	0.00025908
Cellular Component	GO:0101002	11	ficolin-1-rich granule	0.0132058	P14618	322	0.414	Q1	K	Pyruvate kinase PKM OS=Homo sapiens OX=9606 GN=PKM PE=1 SV=4	PKM	1	4.11221e-09	110.12	AGK(1)PVICATQMLESMIK	3	0.3365	2	1.583	1.521	1.528	0.626	0.629	0.664	0.414	1.32e-06
Cellular Component	GO:0101002	11	ficolin-1-rich granule	0.0132058	P53396	630	0.343	Q1	K	ATP-citrate synthase OS=Homo sapiens OX=9606 GN=ACLY PE=1 SV=3	ACLY	1	1.34053e-06	87.088	GVTIIGPATVGGIK(1)PGCFK	3	0.10544	1	1.69	1.666	1.604	0.553	0.597	0.549	0.343	2.0904e-06
Cellular Component	GO:0101002	11	ficolin-1-rich granule	0.0132058	P62937	49	0.371	Q1	K	Peptidyl-prolyl cis-trans isomerase A OS=Homo sapiens OX=9606 GN=PPIA PE=1 SV=2	PPIA	1	2.07978e-08	135.86	GFGYK(1)GSCFHR	2	-0.93186	3	1.604	1.598	1.62	0.613	0.593	0.585	0.371	1.3649e-07
Cellular Component	GO:0101002	11	ficolin-1-rich granule	0.0132058	P62937	44	0.344	Q1	K	Peptidyl-prolyl cis-trans isomerase A OS=Homo sapiens OX=9606 GN=PPIA PE=1 SV=2	PPIA	1	4.67539e-18	164.68	ALSTGEK(1)GFGYK	2	0.16756	2	1.622	1.668	1.664	0.597	0.567	0.54	0.344	1.939e-06
Cellular Component	GO:0030027	5	lamellipodium	0.0506697	P61158	240	0.393	Q1	K	Actin-related protein 3 OS=Homo sapiens OX=9606 GN=ACTR3 PE=1 SV=3	ACTR3	1	1.55569e-05	98.337	YSYVCPDLVK(1)EFNK	3	2.9551	2	1.592	1.567	1.567	0.63	0.614	0.613	0.393	4.4494e-08
Cellular Component	GO:0030027	5	lamellipodium	0.0506697	Q9ULV4	194	0.308	Q1	K	Coronin-1C OS=Homo sapiens OX=9606 GN=CORO1C PE=1 SV=1	CORO1C	1	0.00320052	69.261	NGSLICTASK(1)DK	2	1.4005	2	1.663	1.722	1.748	0.55	0.503	0.528	0.308	1.2137e-06
Cellular Component	GO:0030027	5	lamellipodium	0.0506697	Q13576	553	0.379	Q1	K	Ras GTPase-activating-like protein IQGAP2 OS=Homo sapiens OX=9606 GN=IQGAP2 PE=1 SV=4	IQGAP2	1	0.00516444	78.324	K(1)SSDILSVLK	2	-0.62996	1	1.562	1.607	1.618	0.612	0.547	0.655	0.379	5.7146e-05
Cellular Component	GO:0030027	5	lamellipodium	0.0506697	Q13576	273	0.384	Q1	K	Ras GTPase-activating-like protein IQGAP2 OS=Homo sapiens OX=9606 GN=IQGAP2 PE=1 SV=4	IQGAP2	1	0.00160054	85.163	LK(1)NSCISEEER	2	-0.32659	1	1.651	1.654	1.463	0.624	0.568	0.638	0.384	5.9778e-05
Cellular Component	GO:0030027	5	lamellipodium	0.0506697	Q13576	1454	0.478	Q1	K	Ras GTPase-activating-like protein IQGAP2 OS=Homo sapiens OX=9606 GN=IQGAP2 PE=1 SV=4	IQGAP2	1	0.0105865	86.882	TCLDNLK(1)R	2	-0.99215	1	1.5	1.459	1.416	0.707	0.68	0.706	0.478	1.9511e-06
Cellular Component	GO:0030027	5	lamellipodium	0.0506697	P23528	45	0.342	Q1	K	Cofilin-1 OS=Homo sapiens OX=9606 GN=CFL1 PE=1 SV=3	CFL1	1	0.00127427	101.39	K(1)NIILEEGK	2	0.23308	5	1.734	1.655	1.576	0.555	0.587	0.557	0.342	2.6776e-06
Cellular Component	GO:0030027	5	lamellipodium	0.0506697	P23528	44	0.401	Q1	K	Cofilin-1 OS=Homo sapiens OX=9606 GN=CFL1 PE=1 SV=3	CFL1	1	4.72599e-11	153.95	AVLFCLSEDK(1)K	2	-0.65835	3	1.595	1.575	1.523	0.642	0.654	0.585	0.401	1.80522e-05
Cellular Component	GO:0030027	5	lamellipodium	0.0506697	O60716	448	0.494	Q1	K	Catenin delta-1 OS=Homo sapiens OX=9606 GN=CTNND1 PE=1 SV=1	CTNND1	1	1.1653e-10	125.47	IAIK(1)NCDGVPALVR	3	1.9491	2	1.454	1.467	1.396	0.71	0.723	0.699	0.494	1.3007e-06
Cellular Component	GO:0030027	5	lamellipodium	0.0506697	O60716	846	0.494	Q1	K	Catenin delta-1 OS=Homo sapiens OX=9606 GN=CTNND1 PE=1 SV=1	CTNND1	1	0.000757674	89.507	K(1)SDFQVNLNNASR	2	4.4664	1	1.431	1.414	1.468	0.7	0.699	0.732	0.494	1.4922e-06
Cellular Component	GO:0030027	5	lamellipodium	0.0506697	Q7L576	516	0.465	Q1	K	Cytoplasmic FMR1-interacting protein 1 OS=Homo sapiens OX=9606 GN=CYFIP1 PE=1 SV=1	CYFIP1	1	2.47216e-06	84.107	K(1)TVCDWETGHEPFNDPALR	3	0.46049	1	1.526	1.529	1.372	0.613	0.778	0.666	0.465	0.00060253
Cellular Component	GO:0030027	5	lamellipodium	0.0506697	P50570	90	0.247	Q1	K	Dynamin-2 OS=Homo sapiens OX=9606 GN=DNM2 PE=1 SV=2	DNM2	1	0.007979	78.342	K(1)FTDFDEVR	2	-0.55845	1	1.768	1.787	1.917	0.504	0.415	0.435	0.247	2.2772e-05
Cellular Component	GO:0030027	5	lamellipodium	0.0506697	Q14155	725	0.484	Q1	K	Rho guanine nucleotide exchange factor 7 OS=Homo sapiens OX=9606 GN=ARHGEF7 PE=1 SV=2	ARHGEF7	1	0.00865446	62.162	VIEAYCTSAK(1)TR	2	1.6091	1	1.645	1.352	1.365	0.703	0.725	0.683	0.484	0.00039998
Cellular Component	GO:0030027	5	lamellipodium	0.0506697	Q8IZ21	571	0.488	Q1	K	Phosphatase and actin regulator 4 OS=Homo sapiens OX=9606 GN=PHACTR4 PE=1 SV=1	PHACTR4	1	0.0290697	62.799	SK(1)EEWNEIR	2	-0.7695	1	1.549	1.355	1.432	0.686	0.624	0.808	0.488	0.00105731
Cellular Component	GO:0030027	5	lamellipodium	0.0506697	P35221	120	0.488	Q1	K	Catenin alpha-1 OS=Homo sapiens OX=9606 GN=CTNNA1 PE=1 SV=1	CTNNA1	1	5.50199e-08	107.82	AAAGEFADDPCSSVK(1)R	2	-0.12176	1	1.365	1.42	1.547	0.7	0.659	0.755	0.488	0.000182432
Cellular Component	GO:0031252	4	cell leading edge	0.0104082	P61158	240	0.393	Q1	K	Actin-related protein 3 OS=Homo sapiens OX=9606 GN=ACTR3 PE=1 SV=3	ACTR3	1	1.55569e-05	98.337	YSYVCPDLVK(1)EFNK	3	2.9551	2	1.592	1.567	1.567	0.63	0.614	0.613	0.393	4.4494e-08
Cellular Component	GO:0031252	4	cell leading edge	0.0104082	Q13576	553	0.379	Q1	K	Ras GTPase-activating-like protein IQGAP2 OS=Homo sapiens OX=9606 GN=IQGAP2 PE=1 SV=4	IQGAP2	1	0.00516444	78.324	K(1)SSDILSVLK	2	-0.62996	1	1.562	1.607	1.618	0.612	0.547	0.655	0.379	5.7146e-05
Cellular Component	GO:0031252	4	cell leading edge	0.0104082	Q13576	273	0.384	Q1	K	Ras GTPase-activating-like protein IQGAP2 OS=Homo sapiens OX=9606 GN=IQGAP2 PE=1 SV=4	IQGAP2	1	0.00160054	85.163	LK(1)NSCISEEER	2	-0.32659	1	1.651	1.654	1.463	0.624	0.568	0.638	0.384	5.9778e-05
Cellular Component	GO:0031252	4	cell leading edge	0.0104082	Q13576	1454	0.478	Q1	K	Ras GTPase-activating-like protein IQGAP2 OS=Homo sapiens OX=9606 GN=IQGAP2 PE=1 SV=4	IQGAP2	1	0.0105865	86.882	TCLDNLK(1)R	2	-0.99215	1	1.5	1.459	1.416	0.707	0.68	0.706	0.478	1.9511e-06
Cellular Component	GO:0031252	4	cell leading edge	0.0104082	Q7L576	516	0.465	Q1	K	Cytoplasmic FMR1-interacting protein 1 OS=Homo sapiens OX=9606 GN=CYFIP1 PE=1 SV=1	CYFIP1	1	2.47216e-06	84.107	K(1)TVCDWETGHEPFNDPALR	3	0.46049	1	1.526	1.529	1.372	0.613	0.778	0.666	0.465	0.00060253
Cellular Component	GO:0031252	4	cell leading edge	0.0104082	Q14155	725	0.484	Q1	K	Rho guanine nucleotide exchange factor 7 OS=Homo sapiens OX=9606 GN=ARHGEF7 PE=1 SV=2	ARHGEF7	1	0.00865446	62.162	VIEAYCTSAK(1)TR	2	1.6091	1	1.645	1.352	1.365	0.703	0.725	0.683	0.484	0.00039998
Cellular Component	GO:0031252	4	cell leading edge	0.0104082	P16144	834	0.349	Q1	K	Integrin beta-4 OS=Homo sapiens OX=9606 GN=ITGB4 PE=1 SV=5	ITGB4	1	1.56452e-06	115.12	LCTENLLK(1)PDTR	3	-0.48166	2	1.603	1.662	1.661	0.6	0.55	0.57	0.349	1.481e-06
Cellular Component	GO:0031252	4	cell leading edge	0.0104082	Q9UNF0	167	0.456	Q1	K	Protein kinase C and casein kinase substrate in neurons protein 2 OS=Homo sapiens OX=9606 GN=PACSIN2 PE=1 SV=2	PACSIN2	1	0.00836713	89.827	EEK(1)LAISR	2	2.2291	1	1.553	1.528	1.383	0.68	0.649	0.706	0.456	5.8155e-05
Cellular Component	GO:0031252	4	cell leading edge	0.0104082	P21281	109	0.48	Q1	K	V-type proton ATPase subunit B, brain isoform OS=Homo sapiens OX=9606 GN=ATP6V1B2 PE=1 SV=3	ATP6V1B2	1	0.000924525	87.718	K(1)TSCEFTGDILR	3	-0.37516	3	1.482	1.45	1.439	0.716	0.687	0.694	0.48	5.5611e-07
Cellular Component	GO:0031252	4	cell leading edge	0.0104082	Q9UM54	240	0.316	Q1	K	Unconventional myosin-VI OS=Homo sapiens OX=9606 GN=MYO6 PE=1 SV=4	MYO6	1	0.0165223	70.056	ICVQGK(1)EER	2	-0.27571	1	1.747	1.741	1.607	0.539	0.568	0.505	0.316	1.61137e-05
Cellular Component	GO:0031252	4	cell leading edge	0.0104082	Q9UM54	325	0.466	Q1	K	Unconventional myosin-VI OS=Homo sapiens OX=9606 GN=MYO6 PE=1 SV=4	MYO6	1	0.0271518	81.296	MCTAMK(1)K	2	-0.14267	1	1.465	1.483	1.477	0.704	0.711	0.646	0.466	0.00160093
Cellular Component	GO:0031252	4	cell leading edge	0.0104082	P07900	576	0.235	Q1	K	Heat shock protein HSP 90-alpha OS=Homo sapiens OX=9606 GN=HSP90AA1 PE=1 SV=5	HSP90AA1	1	0.00316475	93.096	IMK(1)DILEK	3	0.51489	4	1.881	1.876	1.791	0.418	0.456	0.43	0.235	5.6281e-07
Cellular Component	GO:0031252	4	cell leading edge	0.0104082	Q9Y490	2445	0.279	Q1	K	Talin-1 OS=Homo sapiens OX=9606 GN=TLN1 PE=1 SV=3	TLN1	1	2.8004e-05	114.7	VK(1)ADQDSEAMK	2	-0.094946	1	1.709	1.766	1.815	0.526	0.472	0.478	0.279	2.4271e-06
Cellular Component	GO:0031252	4	cell leading edge	0.0104082	Q9ULV4	194	0.308	Q1	K	Coronin-1C OS=Homo sapiens OX=9606 GN=CORO1C PE=1 SV=1	CORO1C	1	0.00320052	69.261	NGSLICTASK(1)DK	2	1.4005	2	1.663	1.722	1.748	0.55	0.503	0.528	0.308	1.2137e-06
Cellular Component	GO:0031252	4	cell leading edge	0.0104082	P35579	180	0.355	Q1	K	Myosin-9 OS=Homo sapiens OX=9606 GN=MYH9 PE=1 SV=4	MYH9	1	5.30441e-22	143.04	EDQSILCTGESGAGK(1)TENTK	3	-0.56027	1	1.567	1.76	1.57	0.594	0.577	0.566	0.355	1.72257e-05
Cellular Component	GO:0031252	4	cell leading edge	0.0104082	P35579	565	0.403	Q1	K	Myosin-9 OS=Homo sapiens OX=9606 GN=MYH9 PE=1 SV=4	MYH9	1	0.00243053	54.898	DK(1)ADFCIIHYAGK	3	-0.65742	1	1.575	1.478	1.63	0.589	0.674	0.622	0.403	4.3735e-05
Cellular Component	GO:0031252	4	cell leading edge	0.0104082	P23528	45	0.342	Q1	K	Cofilin-1 OS=Homo sapiens OX=9606 GN=CFL1 PE=1 SV=3	CFL1	1	0.00127427	101.39	K(1)NIILEEGK	2	0.23308	5	1.734	1.655	1.576	0.555	0.587	0.557	0.342	2.6776e-06
Cellular Component	GO:0031252	4	cell leading edge	0.0104082	P23528	44	0.401	Q1	K	Cofilin-1 OS=Homo sapiens OX=9606 GN=CFL1 PE=1 SV=3	CFL1	1	4.72599e-11	153.95	AVLFCLSEDK(1)K	2	-0.65835	3	1.595	1.575	1.523	0.642	0.654	0.585	0.401	1.80522e-05
Cellular Component	GO:0031252	4	cell leading edge	0.0104082	O60716	448	0.494	Q1	K	Catenin delta-1 OS=Homo sapiens OX=9606 GN=CTNND1 PE=1 SV=1	CTNND1	1	1.1653e-10	125.47	IAIK(1)NCDGVPALVR	3	1.9491	2	1.454	1.467	1.396	0.71	0.723	0.699	0.494	1.3007e-06
Cellular Component	GO:0031252	4	cell leading edge	0.0104082	O60716	846	0.494	Q1	K	Catenin delta-1 OS=Homo sapiens OX=9606 GN=CTNND1 PE=1 SV=1	CTNND1	1	0.000757674	89.507	K(1)SDFQVNLNNASR	2	4.4664	1	1.431	1.414	1.468	0.7	0.699	0.732	0.494	1.4922e-06
Cellular Component	GO:0031252	4	cell leading edge	0.0104082	P50570	90	0.247	Q1	K	Dynamin-2 OS=Homo sapiens OX=9606 GN=DNM2 PE=1 SV=2	DNM2	1	0.007979	78.342	K(1)FTDFDEVR	2	-0.55845	1	1.768	1.787	1.917	0.504	0.415	0.435	0.247	2.2772e-05
Cellular Component	GO:0031252	4	cell leading edge	0.0104082	Q8IZ21	571	0.488	Q1	K	Phosphatase and actin regulator 4 OS=Homo sapiens OX=9606 GN=PHACTR4 PE=1 SV=1	PHACTR4	1	0.0290697	62.799	SK(1)EEWNEIR	2	-0.7695	1	1.549	1.355	1.432	0.686	0.624	0.808	0.488	0.00105731
Cellular Component	GO:0031252	4	cell leading edge	0.0104082	P43034	360	0.433	Q1	K	Platelet-activating factor acetylhydrolase IB subunit alpha OS=Homo sapiens OX=9606 GN=PAFAH1B1 PE=1 SV=2	PAFAH1B1	1	0.00320332	72.705	FILSCADDK(1)TLR	2	0.75147	1	1.351	1.606	1.584	0.52	0.74	0.704	0.433	0.0023609
Cellular Component	GO:0031252	4	cell leading edge	0.0104082	P35221	120	0.488	Q1	K	Catenin alpha-1 OS=Homo sapiens OX=9606 GN=CTNNA1 PE=1 SV=1	CTNNA1	1	5.50199e-08	107.82	AAAGEFADDPCSSVK(1)R	2	-0.12176	1	1.365	1.42	1.547	0.7	0.659	0.755	0.488	0.000182432
Cellular Component	GO:0045252	10	oxoglutarate dehydrogenase complex	0.101136	P09622	66	0.426	Q1	K	Dihydrolipoyl dehydrogenase, mitochondrial OS=Homo sapiens OX=9606 GN=DLD PE=1 SV=2	DLD	1	6.84578e-17	148.57	AAQLGFK(1)TVCIEK	2	0.7406	2	1.537	1.514	1.534	0.697	0.632	0.626	0.426	0.00164226
Cellular Component	GO:0045252	10	oxoglutarate dehydrogenase complex	0.101136	Q02218	401	0.272	Q1	K	2-oxoglutarate dehydrogenase, mitochondrial OS=Homo sapiens OX=9606 GN=OGDH PE=1 SV=3	OGDH	1	0.00209311	68.972	AEQFYCGDTEGK(1)K	2	0.74858	1	1.697	1.793	1.836	0.505	0.541	0.405	0.272	0.000136433
Cellular Component	GO:0097223	4	sperm part	0.172585	P09622	66	0.426	Q1	K	Dihydrolipoyl dehydrogenase, mitochondrial OS=Homo sapiens OX=9606 GN=DLD PE=1 SV=2	DLD	1	6.84578e-17	148.57	AAQLGFK(1)TVCIEK	2	0.7406	2	1.537	1.514	1.534	0.697	0.632	0.626	0.426	0.00164226
Cellular Component	GO:0097223	4	sperm part	0.172585	P08238	559	0.479	Q1	K	Heat shock protein HSP 90-beta OS=Homo sapiens OX=9606 GN=HSP90AB1 PE=1 SV=4	HSP90AB1	1	0.00072324	111.17	AK(1)FENLCK	3	-0.027707	2	1.508	1.469	1.398	0.714	0.677	0.704	0.479	1.56421e-05
Cellular Component	GO:0097223	4	sperm part	0.172585	P08238	568	0.153	Q1	K	Heat shock protein HSP 90-beta OS=Homo sapiens OX=9606 GN=HSP90AB1 PE=1 SV=4	HSP90AB1	1	0.0129056	82.417	LMK(1)EILDK	2	-0.52759	1	2.117	2.005	1.986	0.335	0.306	0.291	0.153	1.0451e-06
Cellular Component	GO:0097223	4	sperm part	0.172585	P35221	120	0.488	Q1	K	Catenin alpha-1 OS=Homo sapiens OX=9606 GN=CTNNA1 PE=1 SV=1	CTNNA1	1	5.50199e-08	107.82	AAAGEFADDPCSSVK(1)R	2	-0.12176	1	1.365	1.42	1.547	0.7	0.659	0.755	0.488	0.000182432
Cellular Component	GO:0097223	4	sperm part	0.172585	P62826	123	0.484	Q1	K	GTP-binding nuclear protein Ran OS=Homo sapiens OX=9606 GN=RAN PE=1 SV=3	RAN	1	1.12796e-19	139.29	VCENIPIVLCGNK(1)VDIK	3	-0.81793	3	1.435	1.493	1.423	0.688	0.703	0.715	0.484	1.2707e-06
Cellular Component	GO:0097223	4	sperm part	0.172585	Q16181	208	0.405	Q1	K	Septin-7 OS=Homo sapiens OX=9606 GN=SEPTIN7 PE=1 SV=2	SEPTIN7	1	6.18208e-46	200.19	ADTLTPEECQQFK(1)K	2	0.48685	5	1.584	1.532	1.557	0.624	0.625	0.642	0.405	1.4162e-07
Cellular Component	GO:0045239	8	tricarboxylic acid cycle enzyme complex	0.208434	P09622	66	0.426	Q1	K	Dihydrolipoyl dehydrogenase, mitochondrial OS=Homo sapiens OX=9606 GN=DLD PE=1 SV=2	DLD	1	6.84578e-17	148.57	AAQLGFK(1)TVCIEK	2	0.7406	2	1.537	1.514	1.534	0.697	0.632	0.626	0.426	0.00164226
Cellular Component	GO:0045239	8	tricarboxylic acid cycle enzyme complex	0.208434	Q02218	401	0.272	Q1	K	2-oxoglutarate dehydrogenase, mitochondrial OS=Homo sapiens OX=9606 GN=OGDH PE=1 SV=3	OGDH	1	0.00209311	68.972	AEQFYCGDTEGK(1)K	2	0.74858	1	1.697	1.793	1.836	0.505	0.541	0.405	0.272	0.000136433
Cellular Component	GO:0005881	12	cytoplasmic microtubule	0.208434	Q14980	73	0.492	Q1	K	Nuclear mitotic apparatus protein 1 OS=Homo sapiens OX=9606 GN=NUMA1 PE=1 SV=2	NUMA1	1	0.000365798	79.652	K(1)HPSSPECLVSAQK	3	-1.1446	1	1.499	1.405	1.421	0.698	0.705	0.725	0.492	3.285e-06
Cellular Component	GO:0005881	12	cytoplasmic microtubule	0.208434	Q14980	303	0.293	Q1	K	Nuclear mitotic apparatus protein 1 OS=Homo sapiens OX=9606 GN=NUMA1 PE=1 SV=2	NUMA1	1	3.57606e-05	134.13	QCQDLK(1)TEK	2	0.098392	2	1.777	1.74	1.697	0.489	0.495	0.545	0.293	2.4028e-06
Cellular Component	GO:0005881	12	cytoplasmic microtubule	0.208434	P43034	360	0.433	Q1	K	Platelet-activating factor acetylhydrolase IB subunit alpha OS=Homo sapiens OX=9606 GN=PAFAH1B1 PE=1 SV=2	PAFAH1B1	1	0.00320332	72.705	FILSCADDK(1)TLR	2	0.75147	1	1.351	1.606	1.584	0.52	0.74	0.704	0.433	0.0023609
Cellular Component	GO:0048770	9	pigment granule	0.0480362	P62820	131	0.394	Q1	K	Ras-related protein Rab-1A OS=Homo sapiens OX=9606 GN=RAB1A PE=1 SV=3	RAB1A	1	0.00887163	101.72	CDLTTK(1)K	2	-1.4943	1	1.672	1.534	1.52	0.627	0.649	0.585	0.394	2.347e-05
Cellular Component	GO:0048770	9	pigment granule	0.0480362	P04843	538	0.417	Q1	K	Dolichyl-diphosphooligosaccharide--protein glycosyltransferase subunit 1 OS=Homo sapiens OX=9606 GN=RPN1 PE=1 SV=1	RPN1	1	0.000596927	91.62	LK(1)TEGSDLCDR	3	-0.056382	2	1.554	1.514	1.55	0.636	0.655	0.637	0.417	1.3213e-07
Cellular Component	GO:0048770	9	pigment granule	0.0480362	P50991	292	0.438	Q1	K	T-complex protein 1 subunit delta OS=Homo sapiens OX=9606 GN=CCT4 PE=1 SV=4	CCT4	1	1.33037e-06	131.06	K(1)TGCNVLLIQK	2	-1.0315	3	1.553	1.521	1.461	0.65	0.647	0.688	0.438	3.2357e-06
Cellular Component	GO:0048770	9	pigment granule	0.0480362	Q06830	178	0.453	Q1	K	Peroxiredoxin-1 OS=Homo sapiens OX=9606 GN=PRDX1 PE=1 SV=1	PRDX1	0.999997	5.6436e-11	97.69	HGEVCPAGWK(1)PGSDTIKPDVQK	5	0.01739	4	1.498	1.509	1.469	0.721	0.688	0.619	0.453	6.26e-05
Cellular Component	GO:0048770	9	pigment granule	0.0480362	P08238	559	0.479	Q1	K	Heat shock protein HSP 90-beta OS=Homo sapiens OX=9606 GN=HSP90AB1 PE=1 SV=4	HSP90AB1	1	0.00072324	111.17	AK(1)FENLCK	3	-0.027707	2	1.508	1.469	1.398	0.714	0.677	0.704	0.479	1.56421e-05
Cellular Component	GO:0048770	9	pigment granule	0.0480362	P08238	568	0.153	Q1	K	Heat shock protein HSP 90-beta OS=Homo sapiens OX=9606 GN=HSP90AB1 PE=1 SV=4	HSP90AB1	1	0.0129056	82.417	LMK(1)EILDK	2	-0.52759	1	2.117	2.005	1.986	0.335	0.306	0.291	0.153	1.0451e-06
Cellular Component	GO:0048770	9	pigment granule	0.0480362	P21281	109	0.48	Q1	K	V-type proton ATPase subunit B, brain isoform OS=Homo sapiens OX=9606 GN=ATP6V1B2 PE=1 SV=3	ATP6V1B2	1	0.000924525	87.718	K(1)TSCEFTGDILR	3	-0.37516	3	1.482	1.45	1.439	0.716	0.687	0.694	0.48	5.5611e-07
Cellular Component	GO:0048770	9	pigment granule	0.0480362	P30101	94	0.42	Q1	K	Protein disulfide-isomerase A3 OS=Homo sapiens OX=9606 GN=PDIA3 PE=1 SV=4	PDIA3	1	3.5914e-41	161.47	VDCTANTNTCNK(1)YGVSGYPTLK	4	-0.65929	5	1.559	1.492	1.558	0.681	0.625	0.63	0.42	4.8366e-06
Cellular Component	GO:0048770	9	pigment granule	0.0480362	P30101	415	0.45	Q1	K	Protein disulfide-isomerase A3 OS=Homo sapiens OX=9606 GN=PDIA3 PE=1 SV=4	PDIA3	1	0.0215894	85.676	NLEPK(1)YK	3	0.15336	4	1.566	1.535	1.386	0.673	0.669	0.679	0.45	0.0022784
Cellular Component	GO:0048770	9	pigment granule	0.0480362	P30101	82	0.469	Q1	K	Protein disulfide-isomerase A3 OS=Homo sapiens OX=9606 GN=PDIA3 PE=1 SV=4	PDIA3	1	6.15521e-11	117.18	GIVPLAK(1)VDCTANTNTCNK	3	-0.14257	4	1.365	1.513	1.526	0.693	0.669	0.704	0.469	4.061e-05
Cellular Component	GO:0048770	9	pigment granule	0.0480362	P07900	576	0.235	Q1	K	Heat shock protein HSP 90-alpha OS=Homo sapiens OX=9606 GN=HSP90AA1 PE=1 SV=5	HSP90AA1	1	0.00316475	93.096	IMK(1)DILEK	3	0.51489	4	1.881	1.876	1.791	0.418	0.456	0.43	0.235	5.6281e-07
Cellular Component	GO:0048770	9	pigment granule	0.0480362	P07237	308	0.278	Q1	K	Protein disulfide-isomerase OS=Homo sapiens OX=9606 GN=P4HB PE=1 SV=3	P4HB	1	0.00332344	86.898	ILEFFGLK(1)K	3	-0.031928	2	1.755	1.698	1.841	0.452	0.513	0.506	0.278	1.51387e-05
Cellular Component	GO:0048770	9	pigment granule	0.0480362	P07237	309	0.424	Q1	K	Protein disulfide-isomerase OS=Homo sapiens OX=9606 GN=P4HB PE=1 SV=3	P4HB	1	0.00170122	121.64	K(1)EECPAVR	3	0.4143	2	1.6	1.521	1.471	0.613	0.641	0.691	0.424	3.7866e-05
Cellular Component	GO:0048770	9	pigment granule	0.0480362	P62826	123	0.484	Q1	K	GTP-binding nuclear protein Ran OS=Homo sapiens OX=9606 GN=RAN PE=1 SV=3	RAN	1	1.12796e-19	139.29	VCENIPIVLCGNK(1)VDIK	3	-0.81793	3	1.435	1.493	1.423	0.688	0.703	0.715	0.484	1.2707e-06
Cellular Component	GO:0048770	9	pigment granule	0.0480362	Q8WUM4	234	0.284	Q1	K	Programmed cell death 6-interacting protein OS=Homo sapiens OX=9606 GN=PDCD6IP PE=1 SV=1	PDCD6IP	1	4.05874e-05	122.7	QCQYK(1)DTLPK	2	-2.2661	2	1.797	1.8	1.665	0.489	0.513	0.495	0.284	9.0293e-07
Cellular Component	GO:0045121	6	membrane raft	0.00739973	Q9ULV4	194	0.308	Q1	K	Coronin-1C OS=Homo sapiens OX=9606 GN=CORO1C PE=1 SV=1	CORO1C	1	0.00320052	69.261	NGSLICTASK(1)DK	2	1.4005	2	1.663	1.722	1.748	0.55	0.503	0.528	0.308	1.2137e-06
Cellular Component	GO:0045121	6	membrane raft	0.00739973	P13639	571	0.45	Q1	K	Elongation factor 2 OS=Homo sapiens OX=9606 GN=EEF2 PE=1 SV=4	EEF2	1	3.14699e-17	154.28	DLEEDHACIPIK(1)K	2	-0.69618	3	1.467	1.535	1.479	0.652	0.65	0.715	0.45	1.99925e-05
Cellular Component	GO:0045121	6	membrane raft	0.00739973	P13639	594	0.491	Q1	K	Elongation factor 2 OS=Homo sapiens OX=9606 GN=EEF2 PE=1 SV=4	EEF2	1	1.69803e-09	110.12	ETVSEESNVLCLSK(1)SPNK	3	-0.52971	1	1.437	1.587	1.307	0.754	0.662	0.709	0.491	0.00046028
Cellular Component	GO:0045121	6	membrane raft	0.00739973	P50454	160	0.454	Q1	K	Serpin H1 OS=Homo sapiens OX=9606 GN=SERPINH1 PE=1 SV=2	SERPINH1	1	4.32455e-11	129.17	QHYNCEHSK(1)INFR	3	0.55646	2	1.446	1.567	1.452	0.654	0.712	0.663	0.454	2.4472e-05
Cellular Component	GO:0045121	6	membrane raft	0.00739973	P18206	316	0.374	Q1	K	Vinculin OS=Homo sapiens OX=9606 GN=VCL PE=1 SV=4	VCL	1	0.0100094	72.34	VGELCAGK(1)ER	2	-1.6995	1	1.722	1.618	1.478	0.627	0.582	0.593	0.374	3.9318e-05
Cellular Component	GO:0045121	6	membrane raft	0.00739973	Q9UNF0	167	0.456	Q1	K	Protein kinase C and casein kinase substrate in neurons protein 2 OS=Homo sapiens OX=9606 GN=PACSIN2 PE=1 SV=2	PACSIN2	1	0.00836713	89.827	EEK(1)LAISR	2	2.2291	1	1.553	1.528	1.383	0.68	0.649	0.706	0.456	5.8155e-05
Cellular Component	GO:0045121	6	membrane raft	0.00739973	Q99497	62	0.381	Q1	K	Protein/nucleic acid deglycase DJ-1 OS=Homo sapiens OX=9606 GN=PARK7 PE=1 SV=2	PARK7	1	2.72946e-27	162.29	DVVICPDASLEDAK(1)K	2	-0.16613	1	1.505	1.635	1.635	0.609	0.57	0.638	0.381	2.1387e-05
Cellular Component	GO:0045121	6	membrane raft	0.00739973	Q9NZM1	1386	0.358	Q1	K	Myoferlin OS=Homo sapiens OX=9606 GN=MYOF PE=1 SV=1	MYOF	1	0.00733557	69.03	K(1)PVVGQCTIER	3	0.44959	2	1.542	1.597	1.737	0.569	0.6	0.579	0.358	1.59973e-05
Cellular Component	GO:0045121	6	membrane raft	0.00739973	P00558	97	0.42	Q1	K	Phosphoglycerate kinase 1 OS=Homo sapiens OX=9606 GN=PGK1 PE=1 SV=3	PGK1	1	8.36005e-22	151.04	DVLFLK(1)DCVGPEVEK	4	-0.086536	3	1.557	1.509	1.541	0.64	0.644	0.652	0.42	6.9766e-08
Cellular Component	GO:0045121	6	membrane raft	0.00739973	P10644	367	0.327	Q1	K	cAMP-dependent protein kinase type I-alpha regulatory subunit OS=Homo sapiens OX=9606 GN=PRKAR1A PE=1 SV=1	PRKAR1A	1	6.36671e-05	106.67	VLGPCSDILK(1)R	2	-0.67679	1	1.637	1.64	1.76	0.573	0.538	0.536	0.327	2.0587e-06
Cellular Component	GO:0045121	6	membrane raft	0.00739973	P35221	120	0.488	Q1	K	Catenin alpha-1 OS=Homo sapiens OX=9606 GN=CTNNA1 PE=1 SV=1	CTNNA1	1	5.50199e-08	107.82	AAAGEFADDPCSSVK(1)R	2	-0.12176	1	1.365	1.42	1.547	0.7	0.659	0.755	0.488	0.000182432
Cellular Component	GO:0045121	6	membrane raft	0.00739973	P13861	379	0.477	Q1	K	cAMP-dependent protein kinase type II-alpha regulatory subunit OS=Homo sapiens OX=9606 GN=PRKAR2A PE=1 SV=2	PRKAR2A	1	0.00222902	71.03	LLGPCMDIMK(1)R	3	-0.51879	2	1.403	1.491	1.483	0.719	0.659	0.711	0.477	2.2538e-05
Cellular Component	GO:0030056	4	hemidesmosome	0.101136	Q15149	4576	0.476	Q1	K	Plectin OS=Homo sapiens OX=9606 GN=PLEC PE=1 SV=3	PLEC	1	0.00380529	103.88	YLTCPK(1)TK	3	-0.20071	2	1.483	1.446	1.456	0.71	0.693	0.685	0.476	2.7992e-07
Cellular Component	GO:0030056	4	hemidesmosome	0.101136	P16144	834	0.349	Q1	K	Integrin beta-4 OS=Homo sapiens OX=9606 GN=ITGB4 PE=1 SV=5	ITGB4	1	1.56452e-06	115.12	LCTENLLK(1)PDTR	3	-0.48166	2	1.603	1.662	1.661	0.6	0.55	0.57	0.349	1.481e-06
Cellular Component	GO:0031588	7	nucleotide-activated protein kinase complex	0.101136	P10644	367	0.327	Q1	K	cAMP-dependent protein kinase type I-alpha regulatory subunit OS=Homo sapiens OX=9606 GN=PRKAR1A PE=1 SV=1	PRKAR1A	1	6.36671e-05	106.67	VLGPCSDILK(1)R	2	-0.67679	1	1.637	1.64	1.76	0.573	0.538	0.536	0.327	2.0587e-06
Cellular Component	GO:0031588	7	nucleotide-activated protein kinase complex	0.101136	P13861	379	0.477	Q1	K	cAMP-dependent protein kinase type II-alpha regulatory subunit OS=Homo sapiens OX=9606 GN=PRKAR2A PE=1 SV=2	PRKAR2A	1	0.00222902	71.03	LLGPCMDIMK(1)R	3	-0.51879	2	1.403	1.491	1.483	0.719	0.659	0.711	0.477	2.2538e-05
Cellular Component	GO:0035580	12	specific granule lumen	0.283617	Q7L576	516	0.465	Q1	K	Cytoplasmic FMR1-interacting protein 1 OS=Homo sapiens OX=9606 GN=CYFIP1 PE=1 SV=1	CYFIP1	1	2.47216e-06	84.107	K(1)TVCDWETGHEPFNDPALR	3	0.46049	1	1.526	1.529	1.372	0.613	0.778	0.666	0.465	0.00060253
Cellular Component	GO:0035580	12	specific granule lumen	0.283617	Q9UBR2	166	0.449	Q1	K	Cathepsin Z OS=Homo sapiens OX=9606 GN=CTSZ PE=1 SV=1	CTSZ	1	0.000205059	60.764	DQECDK(1)FNQCGTCNEFK	3	-1.2451	1	1.478	1.62	1.39	0.638	0.761	0.617	0.449	0.00052197
Cellular Component	GO:0035580	12	specific granule lumen	0.283617	P18206	316	0.374	Q1	K	Vinculin OS=Homo sapiens OX=9606 GN=VCL PE=1 SV=4	VCL	1	0.0100094	72.34	VGELCAGK(1)ER	2	-1.6995	1	1.722	1.618	1.478	0.627	0.582	0.593	0.374	3.9318e-05
Cellular Component	GO:0000788	14	nuclear nucleosome	0.0558099	P84243	37	0.422	Q1	K	Histone H3.3 OS=Homo sapiens OX=9606 GN=H3-3A PE=1 SV=2	H3-3A	1	0.000237623	93.623	K(1)SAPSTGGVK(1)K	2	-0.62162	5	1.579	1.45	1.573	0.637	0.664	0.641	0.422	4.7532e-06
Cellular Component	GO:0000788	14	nuclear nucleosome	0.0558099	Q99525	6	0.281	Q1	K	Histone H4-like protein type G OS=Homo sapiens OX=9606 GN=HIST1H4G PE=1 SV=1	HIST1H4G	1	1.63111e-05	105.19	GK(1)AGK(1)GLGK(1)GGAK	2	-0.36748	2	1.814	1.733	1.733	0.489	0.483	0.513	0.281	3.7489e-07
Cellular Component	GO:0000788	14	nuclear nucleosome	0.0558099	Q99525	9	0.281	Q1	K	Histone H4-like protein type G OS=Homo sapiens OX=9606 GN=HIST1H4G PE=1 SV=1	HIST1H4G	1	1.63111e-05	105.19	GK(1)AGK(1)GLGK(1)GGAK	2	-0.36748	2	1.814	1.733	1.733	0.489	0.483	0.513	0.281	3.7489e-07
Cellular Component	GO:0001726	5	ruffle	0.0307891	P23528	45	0.342	Q1	K	Cofilin-1 OS=Homo sapiens OX=9606 GN=CFL1 PE=1 SV=3	CFL1	1	0.00127427	101.39	K(1)NIILEEGK	2	0.23308	5	1.734	1.655	1.576	0.555	0.587	0.557	0.342	2.6776e-06
Cellular Component	GO:0001726	5	ruffle	0.0307891	P23528	44	0.401	Q1	K	Cofilin-1 OS=Homo sapiens OX=9606 GN=CFL1 PE=1 SV=3	CFL1	1	4.72599e-11	153.95	AVLFCLSEDK(1)K	2	-0.65835	3	1.595	1.575	1.523	0.642	0.654	0.585	0.401	1.80522e-05
Cellular Component	GO:0001726	5	ruffle	0.0307891	P35579	180	0.355	Q1	K	Myosin-9 OS=Homo sapiens OX=9606 GN=MYH9 PE=1 SV=4	MYH9	1	5.30441e-22	143.04	EDQSILCTGESGAGK(1)TENTK	3	-0.56027	1	1.567	1.76	1.57	0.594	0.577	0.566	0.355	1.72257e-05
Cellular Component	GO:0001726	5	ruffle	0.0307891	P35579	565	0.403	Q1	K	Myosin-9 OS=Homo sapiens OX=9606 GN=MYH9 PE=1 SV=4	MYH9	1	0.00243053	54.898	DK(1)ADFCIIHYAGK	3	-0.65742	1	1.575	1.478	1.63	0.589	0.674	0.622	0.403	4.3735e-05
Cellular Component	GO:0001726	5	ruffle	0.0307891	Q7L576	516	0.465	Q1	K	Cytoplasmic FMR1-interacting protein 1 OS=Homo sapiens OX=9606 GN=CYFIP1 PE=1 SV=1	CYFIP1	1	2.47216e-06	84.107	K(1)TVCDWETGHEPFNDPALR	3	0.46049	1	1.526	1.529	1.372	0.613	0.778	0.666	0.465	0.00060253
Cellular Component	GO:0001726	5	ruffle	0.0307891	P50570	90	0.247	Q1	K	Dynamin-2 OS=Homo sapiens OX=9606 GN=DNM2 PE=1 SV=2	DNM2	1	0.007979	78.342	K(1)FTDFDEVR	2	-0.55845	1	1.768	1.787	1.917	0.504	0.415	0.435	0.247	2.2772e-05
Cellular Component	GO:0001726	5	ruffle	0.0307891	Q14155	725	0.484	Q1	K	Rho guanine nucleotide exchange factor 7 OS=Homo sapiens OX=9606 GN=ARHGEF7 PE=1 SV=2	ARHGEF7	1	0.00865446	62.162	VIEAYCTSAK(1)TR	2	1.6091	1	1.645	1.352	1.365	0.703	0.725	0.683	0.484	0.00039998
Cellular Component	GO:0001726	5	ruffle	0.0307891	Q9UNF0	167	0.456	Q1	K	Protein kinase C and casein kinase substrate in neurons protein 2 OS=Homo sapiens OX=9606 GN=PACSIN2 PE=1 SV=2	PACSIN2	1	0.00836713	89.827	EEK(1)LAISR	2	2.2291	1	1.553	1.528	1.383	0.68	0.649	0.706	0.456	5.8155e-05
Cellular Component	GO:0001726	5	ruffle	0.0307891	P21281	109	0.48	Q1	K	V-type proton ATPase subunit B, brain isoform OS=Homo sapiens OX=9606 GN=ATP6V1B2 PE=1 SV=3	ATP6V1B2	1	0.000924525	87.718	K(1)TSCEFTGDILR	3	-0.37516	3	1.482	1.45	1.439	0.716	0.687	0.694	0.48	5.5611e-07
Cellular Component	GO:0001726	5	ruffle	0.0307891	Q9UM54	240	0.316	Q1	K	Unconventional myosin-VI OS=Homo sapiens OX=9606 GN=MYO6 PE=1 SV=4	MYO6	1	0.0165223	70.056	ICVQGK(1)EER	2	-0.27571	1	1.747	1.741	1.607	0.539	0.568	0.505	0.316	1.61137e-05
Cellular Component	GO:0001726	5	ruffle	0.0307891	Q9UM54	325	0.466	Q1	K	Unconventional myosin-VI OS=Homo sapiens OX=9606 GN=MYO6 PE=1 SV=4	MYO6	1	0.0271518	81.296	MCTAMK(1)K	2	-0.14267	1	1.465	1.483	1.477	0.704	0.711	0.646	0.466	0.00160093
Cellular Component	GO:0001726	5	ruffle	0.0307891	P07900	576	0.235	Q1	K	Heat shock protein HSP 90-alpha OS=Homo sapiens OX=9606 GN=HSP90AA1 PE=1 SV=5	HSP90AA1	1	0.00316475	93.096	IMK(1)DILEK	3	0.51489	4	1.881	1.876	1.791	0.418	0.456	0.43	0.235	5.6281e-07
Cellular Component	GO:0001726	5	ruffle	0.0307891	Q9Y490	2445	0.279	Q1	K	Talin-1 OS=Homo sapiens OX=9606 GN=TLN1 PE=1 SV=3	TLN1	1	2.8004e-05	114.7	VK(1)ADQDSEAMK	2	-0.094946	1	1.709	1.766	1.815	0.526	0.472	0.478	0.279	2.4271e-06
Cellular Component	GO:0033178	6	proton-transporting two-sector ATPase complex, catalytic domain	0.265507	P38606	132	0.405	Q1	K	V-type proton ATPase catalytic subunit A OS=Homo sapiens OX=9606 GN=ATP6V1A PE=1 SV=2	ATP6V1A	1	0.000353207	107.09	DIK(1)WDFTPCK	2	-0.13164	2	1.639	1.537	1.502	0.652	0.641	0.6	0.405	1.77762e-05
Cellular Component	GO:0033178	6	proton-transporting two-sector ATPase complex, catalytic domain	0.265507	P21281	109	0.48	Q1	K	V-type proton ATPase subunit B, brain isoform OS=Homo sapiens OX=9606 GN=ATP6V1B2 PE=1 SV=3	ATP6V1B2	1	0.000924525	87.718	K(1)TSCEFTGDILR	3	-0.37516	3	1.482	1.45	1.439	0.716	0.687	0.694	0.48	5.5611e-07
Cellular Component	GO:0000235	13	astral microtubule	0.0205593	Q14980	73	0.492	Q1	K	Nuclear mitotic apparatus protein 1 OS=Homo sapiens OX=9606 GN=NUMA1 PE=1 SV=2	NUMA1	1	0.000365798	79.652	K(1)HPSSPECLVSAQK	3	-1.1446	1	1.499	1.405	1.421	0.698	0.705	0.725	0.492	3.285e-06
Cellular Component	GO:0000235	13	astral microtubule	0.0205593	Q14980	303	0.293	Q1	K	Nuclear mitotic apparatus protein 1 OS=Homo sapiens OX=9606 GN=NUMA1 PE=1 SV=2	NUMA1	1	3.57606e-05	134.13	QCQDLK(1)TEK	2	0.098392	2	1.777	1.74	1.697	0.489	0.495	0.545	0.293	2.4028e-06
Cellular Component	GO:0000235	13	astral microtubule	0.0205593	P43034	360	0.433	Q1	K	Platelet-activating factor acetylhydrolase IB subunit alpha OS=Homo sapiens OX=9606 GN=PAFAH1B1 PE=1 SV=2	PAFAH1B1	1	0.00320332	72.705	FILSCADDK(1)TLR	2	0.75147	1	1.351	1.606	1.584	0.52	0.74	0.704	0.433	0.0023609
Cellular Component	GO:0098857	5	membrane microdomain	0.00739973	Q9ULV4	194	0.308	Q1	K	Coronin-1C OS=Homo sapiens OX=9606 GN=CORO1C PE=1 SV=1	CORO1C	1	0.00320052	69.261	NGSLICTASK(1)DK	2	1.4005	2	1.663	1.722	1.748	0.55	0.503	0.528	0.308	1.2137e-06
Cellular Component	GO:0098857	5	membrane microdomain	0.00739973	P13639	571	0.45	Q1	K	Elongation factor 2 OS=Homo sapiens OX=9606 GN=EEF2 PE=1 SV=4	EEF2	1	3.14699e-17	154.28	DLEEDHACIPIK(1)K	2	-0.69618	3	1.467	1.535	1.479	0.652	0.65	0.715	0.45	1.99925e-05
Cellular Component	GO:0098857	5	membrane microdomain	0.00739973	P13639	594	0.491	Q1	K	Elongation factor 2 OS=Homo sapiens OX=9606 GN=EEF2 PE=1 SV=4	EEF2	1	1.69803e-09	110.12	ETVSEESNVLCLSK(1)SPNK	3	-0.52971	1	1.437	1.587	1.307	0.754	0.662	0.709	0.491	0.00046028
Cellular Component	GO:0098857	5	membrane microdomain	0.00739973	P50454	160	0.454	Q1	K	Serpin H1 OS=Homo sapiens OX=9606 GN=SERPINH1 PE=1 SV=2	SERPINH1	1	4.32455e-11	129.17	QHYNCEHSK(1)INFR	3	0.55646	2	1.446	1.567	1.452	0.654	0.712	0.663	0.454	2.4472e-05
Cellular Component	GO:0098857	5	membrane microdomain	0.00739973	P18206	316	0.374	Q1	K	Vinculin OS=Homo sapiens OX=9606 GN=VCL PE=1 SV=4	VCL	1	0.0100094	72.34	VGELCAGK(1)ER	2	-1.6995	1	1.722	1.618	1.478	0.627	0.582	0.593	0.374	3.9318e-05
Cellular Component	GO:0098857	5	membrane microdomain	0.00739973	Q9UNF0	167	0.456	Q1	K	Protein kinase C and casein kinase substrate in neurons protein 2 OS=Homo sapiens OX=9606 GN=PACSIN2 PE=1 SV=2	PACSIN2	1	0.00836713	89.827	EEK(1)LAISR	2	2.2291	1	1.553	1.528	1.383	0.68	0.649	0.706	0.456	5.8155e-05
Cellular Component	GO:0098857	5	membrane microdomain	0.00739973	Q99497	62	0.381	Q1	K	Protein/nucleic acid deglycase DJ-1 OS=Homo sapiens OX=9606 GN=PARK7 PE=1 SV=2	PARK7	1	2.72946e-27	162.29	DVVICPDASLEDAK(1)K	2	-0.16613	1	1.505	1.635	1.635	0.609	0.57	0.638	0.381	2.1387e-05
Cellular Component	GO:0098857	5	membrane microdomain	0.00739973	Q9NZM1	1386	0.358	Q1	K	Myoferlin OS=Homo sapiens OX=9606 GN=MYOF PE=1 SV=1	MYOF	1	0.00733557	69.03	K(1)PVVGQCTIER	3	0.44959	2	1.542	1.597	1.737	0.569	0.6	0.579	0.358	1.59973e-05
Cellular Component	GO:0098857	5	membrane microdomain	0.00739973	P00558	97	0.42	Q1	K	Phosphoglycerate kinase 1 OS=Homo sapiens OX=9606 GN=PGK1 PE=1 SV=3	PGK1	1	8.36005e-22	151.04	DVLFLK(1)DCVGPEVEK	4	-0.086536	3	1.557	1.509	1.541	0.64	0.644	0.652	0.42	6.9766e-08
Cellular Component	GO:0098857	5	membrane microdomain	0.00739973	P10644	367	0.327	Q1	K	cAMP-dependent protein kinase type I-alpha regulatory subunit OS=Homo sapiens OX=9606 GN=PRKAR1A PE=1 SV=1	PRKAR1A	1	6.36671e-05	106.67	VLGPCSDILK(1)R	2	-0.67679	1	1.637	1.64	1.76	0.573	0.538	0.536	0.327	2.0587e-06
Cellular Component	GO:0098857	5	membrane microdomain	0.00739973	P35221	120	0.488	Q1	K	Catenin alpha-1 OS=Homo sapiens OX=9606 GN=CTNNA1 PE=1 SV=1	CTNNA1	1	5.50199e-08	107.82	AAAGEFADDPCSSVK(1)R	2	-0.12176	1	1.365	1.42	1.547	0.7	0.659	0.755	0.488	0.000182432
Cellular Component	GO:0098857	5	membrane microdomain	0.00739973	P13861	379	0.477	Q1	K	cAMP-dependent protein kinase type II-alpha regulatory subunit OS=Homo sapiens OX=9606 GN=PRKAR2A PE=1 SV=2	PRKAR2A	1	0.00222902	71.03	LLGPCMDIMK(1)R	3	-0.51879	2	1.403	1.491	1.483	0.719	0.659	0.711	0.477	2.2538e-05
Cellular Component	GO:0098589	4	membrane region	0.0037861	O14980	103	0.351	Q1	K	Exportin-1 OS=Homo sapiens OX=9606 GN=XPO1 PE=1 SV=1	XPO1	1	0.00322946	107.79	NQCEGIK(1)K	3	-2.6199	2	1.685	1.659	1.58	0.601	0.573	0.553	0.351	2.2658e-06
Cellular Component	GO:0098589	4	membrane region	0.0037861	O14980	122	0.347	Q1	K	Exportin-1 OS=Homo sapiens OX=9606 GN=XPO1 PE=1 SV=1	XPO1	1	2.0108e-07	125.53	TSSDPTCVEK(1)EK	3	-1.7379	2	1.706	1.593	1.643	0.587	0.569	0.558	0.347	8.8605e-07
Cellular Component	GO:0098589	4	membrane region	0.0037861	Q9ULV4	194	0.308	Q1	K	Coronin-1C OS=Homo sapiens OX=9606 GN=CORO1C PE=1 SV=1	CORO1C	1	0.00320052	69.261	NGSLICTASK(1)DK	2	1.4005	2	1.663	1.722	1.748	0.55	0.503	0.528	0.308	1.2137e-06
Cellular Component	GO:0098589	4	membrane region	0.0037861	P13639	571	0.45	Q1	K	Elongation factor 2 OS=Homo sapiens OX=9606 GN=EEF2 PE=1 SV=4	EEF2	1	3.14699e-17	154.28	DLEEDHACIPIK(1)K	2	-0.69618	3	1.467	1.535	1.479	0.652	0.65	0.715	0.45	1.99925e-05
Cellular Component	GO:0098589	4	membrane region	0.0037861	P13639	594	0.491	Q1	K	Elongation factor 2 OS=Homo sapiens OX=9606 GN=EEF2 PE=1 SV=4	EEF2	1	1.69803e-09	110.12	ETVSEESNVLCLSK(1)SPNK	3	-0.52971	1	1.437	1.587	1.307	0.754	0.662	0.709	0.491	0.00046028
Cellular Component	GO:0098589	4	membrane region	0.0037861	P50570	90	0.247	Q1	K	Dynamin-2 OS=Homo sapiens OX=9606 GN=DNM2 PE=1 SV=2	DNM2	1	0.007979	78.342	K(1)FTDFDEVR	2	-0.55845	1	1.768	1.787	1.917	0.504	0.415	0.435	0.247	2.2772e-05
Cellular Component	GO:0098589	4	membrane region	0.0037861	P50454	160	0.454	Q1	K	Serpin H1 OS=Homo sapiens OX=9606 GN=SERPINH1 PE=1 SV=2	SERPINH1	1	4.32455e-11	129.17	QHYNCEHSK(1)INFR	3	0.55646	2	1.446	1.567	1.452	0.654	0.712	0.663	0.454	2.4472e-05
Cellular Component	GO:0098589	4	membrane region	0.0037861	P18206	316	0.374	Q1	K	Vinculin OS=Homo sapiens OX=9606 GN=VCL PE=1 SV=4	VCL	1	0.0100094	72.34	VGELCAGK(1)ER	2	-1.6995	1	1.722	1.618	1.478	0.627	0.582	0.593	0.374	3.9318e-05
Cellular Component	GO:0098589	4	membrane region	0.0037861	P49792	1332	0.254	Q1	K	E3 SUMO-protein ligase RanBP2 OS=Homo sapiens OX=9606 GN=RANBP2 PE=1 SV=2	RANBP2	1	0.00029099	85.554	EPTSHDNK(1)DICK	3	-1.5358	1	1.751	1.825	1.852	0.407	0.466	0.503	0.254	2.3978e-05
Cellular Component	GO:0098589	4	membrane region	0.0037861	P49792	2581	0.143	Q1	K	E3 SUMO-protein ligase RanBP2 OS=Homo sapiens OX=9606 GN=RANBP2 PE=1 SV=2	RANBP2	0.995422	1.20345e-09	117.65	K(0.005)CELSK(0.995)NSDIEQSSDSK	3	-0.64278	1	2.129	2.071	1.971	0.279	0.301	0.304	0.143	3.2447e-07
Cellular Component	GO:0098589	4	membrane region	0.0037861	P49792	2138	0.256	Q1	K	E3 SUMO-protein ligase RanBP2 OS=Homo sapiens OX=9606 GN=RANBP2 PE=1 SV=2	RANBP2	1	0.00316207	107.21	QK(1)FEECQR	2	0.11464	1	1.752	1.82	1.844	0.454	0.437	0.496	0.256	2.3285e-06
Cellular Component	GO:0098589	4	membrane region	0.0037861	P49792	3034	0.452	Q1	K	E3 SUMO-protein ligase RanBP2 OS=Homo sapiens OX=9606 GN=RANBP2 PE=1 SV=2	RANBP2	1	0.00441888	101.65	EVADCFK(1)K	2	-0.79272	1	1.454	1.469	1.548	0.634	0.709	0.679	0.452	3.5313e-05
Cellular Component	GO:0098589	4	membrane region	0.0037861	Q9UNF0	167	0.456	Q1	K	Protein kinase C and casein kinase substrate in neurons protein 2 OS=Homo sapiens OX=9606 GN=PACSIN2 PE=1 SV=2	PACSIN2	1	0.00836713	89.827	EEK(1)LAISR	2	2.2291	1	1.553	1.528	1.383	0.68	0.649	0.706	0.456	5.8155e-05
Cellular Component	GO:0098589	4	membrane region	0.0037861	Q99497	62	0.381	Q1	K	Protein/nucleic acid deglycase DJ-1 OS=Homo sapiens OX=9606 GN=PARK7 PE=1 SV=2	PARK7	1	2.72946e-27	162.29	DVVICPDASLEDAK(1)K	2	-0.16613	1	1.505	1.635	1.635	0.609	0.57	0.638	0.381	2.1387e-05
Cellular Component	GO:0098589	4	membrane region	0.0037861	Q9UM54	240	0.316	Q1	K	Unconventional myosin-VI OS=Homo sapiens OX=9606 GN=MYO6 PE=1 SV=4	MYO6	1	0.0165223	70.056	ICVQGK(1)EER	2	-0.27571	1	1.747	1.741	1.607	0.539	0.568	0.505	0.316	1.61137e-05
Cellular Component	GO:0098589	4	membrane region	0.0037861	Q9UM54	325	0.466	Q1	K	Unconventional myosin-VI OS=Homo sapiens OX=9606 GN=MYO6 PE=1 SV=4	MYO6	1	0.0271518	81.296	MCTAMK(1)K	2	-0.14267	1	1.465	1.483	1.477	0.704	0.711	0.646	0.466	0.00160093
Cellular Component	GO:0098589	4	membrane region	0.0037861	Q9NZM1	1386	0.358	Q1	K	Myoferlin OS=Homo sapiens OX=9606 GN=MYOF PE=1 SV=1	MYOF	1	0.00733557	69.03	K(1)PVVGQCTIER	3	0.44959	2	1.542	1.597	1.737	0.569	0.6	0.579	0.358	1.59973e-05
Cellular Component	GO:0098589	4	membrane region	0.0037861	P00558	97	0.42	Q1	K	Phosphoglycerate kinase 1 OS=Homo sapiens OX=9606 GN=PGK1 PE=1 SV=3	PGK1	1	8.36005e-22	151.04	DVLFLK(1)DCVGPEVEK	4	-0.086536	3	1.557	1.509	1.541	0.64	0.644	0.652	0.42	6.9766e-08
Cellular Component	GO:0098589	4	membrane region	0.0037861	P10644	367	0.327	Q1	K	cAMP-dependent protein kinase type I-alpha regulatory subunit OS=Homo sapiens OX=9606 GN=PRKAR1A PE=1 SV=1	PRKAR1A	1	6.36671e-05	106.67	VLGPCSDILK(1)R	2	-0.67679	1	1.637	1.64	1.76	0.573	0.538	0.536	0.327	2.0587e-06
Cellular Component	GO:0098589	4	membrane region	0.0037861	P13861	379	0.477	Q1	K	cAMP-dependent protein kinase type II-alpha regulatory subunit OS=Homo sapiens OX=9606 GN=PRKAR2A PE=1 SV=2	PRKAR2A	1	0.00222902	71.03	LLGPCMDIMK(1)R	3	-0.51879	2	1.403	1.491	1.483	0.719	0.659	0.711	0.477	2.2538e-05
Cellular Component	GO:0098589	4	membrane region	0.0037861	P35221	120	0.488	Q1	K	Catenin alpha-1 OS=Homo sapiens OX=9606 GN=CTNNA1 PE=1 SV=1	CTNNA1	1	5.50199e-08	107.82	AAAGEFADDPCSSVK(1)R	2	-0.12176	1	1.365	1.42	1.547	0.7	0.659	0.755	0.488	0.000182432
Cellular Component	GO:0000151	6	ubiquitin ligase complex	0.14781	P63208	66	0.411	Q1	K	S-phase kinase-associated protein 1 OS=Homo sapiens OX=9606 GN=SKP1 PE=1 SV=2	SKP1	1	2.05841e-10	84.327	VIQWCTHHK(1)DDPPPPEDDENKEK	5	0.029289	1	1.562	1.461	1.627	0.671	0.605	0.633	0.411	3.6657e-05
Cellular Component	GO:0000151	6	ubiquitin ligase complex	0.14781	P68036	20	0.375	Q1	K	Ubiquitin-conjugating enzyme E2 L3 OS=Homo sapiens OX=9606 GN=UBE2L3 PE=1 SV=1	UBE2L3	1	0.0424799	74.415	CGMK(1)NFR	2	-0.87016	1	1.738	1.37	1.709	0.653	0.547	0.604	0.375	0.00044276
Cellular Component	GO:0000151	6	ubiquitin ligase complex	0.14781	Q13404	74	0.415	Q1	K	Ubiquitin-conjugating enzyme E2 variant 1 OS=Homo sapiens OX=9606 GN=UBE2V1 PE=1 SV=2	UBE2V1	1	9.06432e-22	150.39	IECGPK(1)YPEAPPFVR	2	0.05563	2	1.479	1.531	1.616	0.639	0.633	0.647	0.415	2.4772e-06
Cellular Component	GO:0000151	6	ubiquitin ligase complex	0.14781	Q13404	68	0.374	Q1	K	Ubiquitin-conjugating enzyme E2 variant 1 OS=Homo sapiens OX=9606 GN=UBE2V1 PE=1 SV=2	UBE2V1	1	1.94405e-08	143.42	IYSLK(1)IECGPK	2	-0.073126	2	1.601	1.602	1.612	0.636	0.601	0.562	0.374	0.00131879
Cellular Component	GO:0000151	6	ubiquitin ligase complex	0.14781	Q86VP6	1156	0.274	Q1	K	Cullin-associated NEDD8-dissociated protein 1 OS=Homo sapiens OX=9606 GN=CAND1 PE=1 SV=2	CAND1	1	0.0029114	109.66	ATCTTK(1)VK	2	-0.76433	1	1.718	1.882	1.712	0.446	0.471	0.538	0.274	3.721e-05
Cellular Component	GO:0000151	6	ubiquitin ligase complex	0.14781	Q9NT62	185	0.432	Q1	K	Ubiquitin-like-conjugating enzyme ATG3 OS=Homo sapiens OX=9606 GN=ATG3 PE=1 SV=1	ATG3	1	1.2016e-27	167.41	AK(1)TDAGGEDAILQTR	2	0.5084	2	1.529	1.524	1.503	0.63	0.665	0.674	0.432	1.2368e-06
Cellular Component	GO:0016600	10	flotillin complex	0.0558099	Q9ULV4	194	0.308	Q1	K	Coronin-1C OS=Homo sapiens OX=9606 GN=CORO1C PE=1 SV=1	CORO1C	1	0.00320052	69.261	NGSLICTASK(1)DK	2	1.4005	2	1.663	1.722	1.748	0.55	0.503	0.528	0.308	1.2137e-06
Cellular Component	GO:0016600	10	flotillin complex	0.0558099	P35221	120	0.488	Q1	K	Catenin alpha-1 OS=Homo sapiens OX=9606 GN=CTNNA1 PE=1 SV=1	CTNNA1	1	5.50199e-08	107.82	AAAGEFADDPCSSVK(1)R	2	-0.12176	1	1.365	1.42	1.547	0.7	0.659	0.755	0.488	0.000182432
Cellular Component	GO:0005901	9	caveola	0.0429768	Q9UNF0	167	0.456	Q1	K	Protein kinase C and casein kinase substrate in neurons protein 2 OS=Homo sapiens OX=9606 GN=PACSIN2 PE=1 SV=2	PACSIN2	1	0.00836713	89.827	EEK(1)LAISR	2	2.2291	1	1.553	1.528	1.383	0.68	0.649	0.706	0.456	5.8155e-05
Cellular Component	GO:0005901	9	caveola	0.0429768	Q9ULV4	194	0.308	Q1	K	Coronin-1C OS=Homo sapiens OX=9606 GN=CORO1C PE=1 SV=1	CORO1C	1	0.00320052	69.261	NGSLICTASK(1)DK	2	1.4005	2	1.663	1.722	1.748	0.55	0.503	0.528	0.308	1.2137e-06
Cellular Component	GO:0005901	9	caveola	0.0429768	Q9NZM1	1386	0.358	Q1	K	Myoferlin OS=Homo sapiens OX=9606 GN=MYOF PE=1 SV=1	MYOF	1	0.00733557	69.03	K(1)PVVGQCTIER	3	0.44959	2	1.542	1.597	1.737	0.569	0.6	0.579	0.358	1.59973e-05
Cellular Component	GO:0005901	9	caveola	0.0429768	P35221	120	0.488	Q1	K	Catenin alpha-1 OS=Homo sapiens OX=9606 GN=CTNNA1 PE=1 SV=1	CTNNA1	1	5.50199e-08	107.82	AAAGEFADDPCSSVK(1)R	2	-0.12176	1	1.365	1.42	1.547	0.7	0.659	0.755	0.488	0.000182432
Cellular Component	GO:0070971	10	endoplasmic reticulum exit site	0.0558099	O94979	647	0.456	Q1	K	Protein transport protein Sec31A OS=Homo sapiens OX=9606 GN=SEC31A PE=1 SV=3	SEC31A	1	0.00188721	79.492	EIVESCDLK(1)NWR	2	-1.025	1	1.508	1.403	1.547	0.619	0.677	0.736	0.456	0.000164778
Cellular Component	GO:0070971	10	endoplasmic reticulum exit site	0.0558099	Q8WUM4	234	0.284	Q1	K	Programmed cell death 6-interacting protein OS=Homo sapiens OX=9606 GN=PDCD6IP PE=1 SV=1	PDCD6IP	1	4.05874e-05	122.7	QCQYK(1)DTLPK	2	-2.2661	2	1.797	1.8	1.665	0.489	0.513	0.495	0.284	9.0293e-07
Cellular Component	GO:0000795	14	synaptonemal complex	0.152938	P63279	49	0.356	Q1	K	SUMO-conjugating enzyme UBC9 OS=Homo sapiens OX=9606 GN=UBE2I PE=1 SV=1	UBE2I	1	0.00141737	86.699	K(1)GTPWEGGLFK	3	0.37048	2	1.601	1.604	1.683	0.538	0.568	0.634	0.356	3.7389e-05
Cellular Component	GO:0000795	14	synaptonemal complex	0.152938	Q9UQE7	977	0.44	Q1	K	Structural maintenance of chromosomes protein 3 OS=Homo sapiens OX=9606 GN=SMC3 PE=1 SV=2	SMC3	0.99997	0.0237068	46.88	KLEQCNTELK(1)K	3	1.6771	1	1.475	1.481	1.565	0.661	0.655	0.674	0.44	1.2541e-06
Cellular Component	GO:0001740	12	Barr body	0.0104837	O75367	304	0.372	Q1	K	Core histone macro-H2A.1 OS=Homo sapiens OX=9606 GN=H2AFY PE=1 SV=4	H2AFY	1	0.000144859	116.24	NCLALADDK(1)K	2	0.39339	2	1.634	1.692	1.494	0.556	0.613	0.622	0.372	4.0974e-05
Cellular Component	GO:0001740	12	Barr body	0.0104837	P84243	37	0.422	Q1	K	Histone H3.3 OS=Homo sapiens OX=9606 GN=H3-3A PE=1 SV=2	H3-3A	1	0.000237623	93.623	K(1)SAPSTGGVK(1)K	2	-0.62162	5	1.579	1.45	1.573	0.637	0.664	0.641	0.422	4.7532e-06
Cellular Component	GO:0001740	12	Barr body	0.0104837	A6NHR9	569	0.401	Q1	K	Structural maintenance of chromosomes flexible hinge domain-containing protein 1 OS=Homo sapiens OX=9606 GN=SMCHD1 PE=1 SV=2	SMCHD1	1	0.00714345	72.928	DCHEK(1)YDK	3	3.8917	1	1.61	1.654	1.43	0.645	0.636	0.6	0.401	5.6202e-05
Cellular Component	GO:0034774	11	secretory granule lumen	0.0223424	P04075	140	0.462	Q1	K	Fructose-bisphosphate aldolase A OS=Homo sapiens OX=9606 GN=ALDOA PE=1 SV=2	ALDOA	1	0.0246193	73.499	K(1)DGADFAK	3	0.18494	2	1.579	1.444	1.418	0.69	0.684	0.679	0.462	0.00189588
Cellular Component	GO:0034774	11	secretory granule lumen	0.0223424	Q99460	803	0.27	Q1	K	26S proteasome non-ATPase regulatory subunit 1 OS=Homo sapiens OX=9606 GN=PSMD1 PE=1 SV=2	PSMD1	1	0.00310268	107.79	VQYK(1)SNCK	2	0.97742	1	1.725	1.781	1.835	0.501	0.47	0.469	0.27	6.2804e-07
Cellular Component	GO:0034774	11	secretory granule lumen	0.0223424	Q7L576	516	0.465	Q1	K	Cytoplasmic FMR1-interacting protein 1 OS=Homo sapiens OX=9606 GN=CYFIP1 PE=1 SV=1	CYFIP1	1	2.47216e-06	84.107	K(1)TVCDWETGHEPFNDPALR	3	0.46049	1	1.526	1.529	1.372	0.613	0.778	0.666	0.465	0.00060253
Cellular Component	GO:0034774	11	secretory granule lumen	0.0223424	P18206	316	0.374	Q1	K	Vinculin OS=Homo sapiens OX=9606 GN=VCL PE=1 SV=4	VCL	1	0.0100094	72.34	VGELCAGK(1)ER	2	-1.6995	1	1.722	1.618	1.478	0.627	0.582	0.593	0.374	3.9318e-05
Cellular Component	GO:0034774	11	secretory granule lumen	0.0223424	O00231	295	0.478	Q1	K	26S proteasome non-ATPase regulatory subunit 11 OS=Homo sapiens OX=9606 GN=PSMD11 PE=1 SV=3	PSMD11	1	0.001407	96.342	CVAQASK(1)NR	2	-0.83892	1	1.327	1.442	1.601	0.681	0.715	0.692	0.478	0.000198007
Cellular Component	GO:0034774	11	secretory granule lumen	0.0223424	P09429	50	0.498	Q1	K	High mobility group protein B1 OS=Homo sapiens OX=9606 GN=HMGB1 PE=1 SV=3	HMGB1	1	0.0185525	64.567	WK(1)TMSAK	3	-0.52405	1	1.515	1.361	1.429	0.766	0.686	0.694	0.498	0.000119089
Cellular Component	GO:0034774	11	secretory granule lumen	0.0223424	Q9UBR2	166	0.449	Q1	K	Cathepsin Z OS=Homo sapiens OX=9606 GN=CTSZ PE=1 SV=1	CTSZ	1	0.000205059	60.764	DQECDK(1)FNQCGTCNEFK	3	-1.2451	1	1.478	1.62	1.39	0.638	0.761	0.617	0.449	0.00052197
Cellular Component	GO:0034774	11	secretory granule lumen	0.0223424	P07900	576	0.235	Q1	K	Heat shock protein HSP 90-alpha OS=Homo sapiens OX=9606 GN=HSP90AA1 PE=1 SV=5	HSP90AA1	1	0.00316475	93.096	IMK(1)DILEK	3	0.51489	4	1.881	1.876	1.791	0.418	0.456	0.43	0.235	5.6281e-07
Cellular Component	GO:0034774	11	secretory granule lumen	0.0223424	Q9NTK5	79	0.4	Q1	K	Obg-like ATPase 1 OS=Homo sapiens OX=9606 GN=OLA1 PE=1 SV=2	OLA1	1	0.000365518	76.759	FDFLCQYHK(1)PASK	3	-0.85143	1	1.533	1.598	1.561	0.627	0.611	0.638	0.4	3.8724e-07
Cellular Component	GO:0034774	11	secretory granule lumen	0.0223424	P17980	125	0.237	Q1	K	26S proteasome regulatory subunit 6A OS=Homo sapiens OX=9606 GN=PSMC3 PE=1 SV=3	PSMC3	1	0.00143165	104.05	CAVIK(1)TSTR	2	-2.0264	1	1.899	1.947	1.692	0.467	0.463	0.384	0.237	4.4152e-05
Cellular Component	GO:0034774	11	secretory granule lumen	0.0223424	P17980	245	0.411	Q1	K	26S proteasome regulatory subunit 6A OS=Homo sapiens OX=9606 GN=PSMC3 PE=1 SV=3	PSMC3	1	1.931e-13	150.11	ACAAQTK(1)ATFLK	2	0.060852	2	1.561	1.511	1.576	0.622	0.649	0.638	0.411	4.732e-07
Cellular Component	GO:0034774	11	secretory granule lumen	0.0223424	P53396	630	0.343	Q1	K	ATP-citrate synthase OS=Homo sapiens OX=9606 GN=ACLY PE=1 SV=3	ACLY	1	1.34053e-06	87.088	GVTIIGPATVGGIK(1)PGCFK	3	0.10544	1	1.69	1.666	1.604	0.553	0.597	0.549	0.343	2.0904e-06
Cellular Component	GO:0034774	11	secretory granule lumen	0.0223424	P62937	49	0.371	Q1	K	Peptidyl-prolyl cis-trans isomerase A OS=Homo sapiens OX=9606 GN=PPIA PE=1 SV=2	PPIA	1	2.07978e-08	135.86	GFGYK(1)GSCFHR	2	-0.93186	3	1.604	1.598	1.62	0.613	0.593	0.585	0.371	1.3649e-07
Cellular Component	GO:0034774	11	secretory granule lumen	0.0223424	P62937	44	0.344	Q1	K	Peptidyl-prolyl cis-trans isomerase A OS=Homo sapiens OX=9606 GN=PPIA PE=1 SV=2	PPIA	1	4.67539e-18	164.68	ALSTGEK(1)GFGYK	2	0.16756	2	1.622	1.668	1.664	0.597	0.567	0.54	0.344	1.939e-06
Cellular Component	GO:0034774	11	secretory granule lumen	0.0223424	P13639	571	0.45	Q1	K	Elongation factor 2 OS=Homo sapiens OX=9606 GN=EEF2 PE=1 SV=4	EEF2	1	3.14699e-17	154.28	DLEEDHACIPIK(1)K	2	-0.69618	3	1.467	1.535	1.479	0.652	0.65	0.715	0.45	1.99925e-05
Cellular Component	GO:0034774	11	secretory granule lumen	0.0223424	P13639	594	0.491	Q1	K	Elongation factor 2 OS=Homo sapiens OX=9606 GN=EEF2 PE=1 SV=4	EEF2	1	1.69803e-09	110.12	ETVSEESNVLCLSK(1)SPNK	3	-0.52971	1	1.437	1.587	1.307	0.754	0.662	0.709	0.491	0.00046028
Cellular Component	GO:0034774	11	secretory granule lumen	0.0223424	Q15008	349	0.366	Q1	K	26S proteasome non-ATPase regulatory subunit 6 OS=Homo sapiens OX=9606 GN=PSMD6 PE=1 SV=1	PSMD6	1	2.45272e-05	93.226	IDK(1)VNEIVETNRPDSK	4	0.090022	2	1.596	1.624	1.626	0.576	0.6	0.598	0.366	1.2631e-07
Cellular Component	GO:0034774	11	secretory granule lumen	0.0223424	P50395	418	0.372	Q1	K	Rab GDP dissociation inhibitor beta OS=Homo sapiens OX=9606 GN=GDI2 PE=1 SV=2	GDI2	1	7.11675e-30	154.74	TYDATTHFETTCDDIK(1)NIYK	3	-0.58508	2	1.621	1.595	1.605	0.615	0.593	0.585	0.372	1.8781e-07
Cellular Component	GO:0034774	11	secretory granule lumen	0.0223424	P50395	288	0.485	Q1	K	Rab GDP dissociation inhibitor beta OS=Homo sapiens OX=9606 GN=GDI2 PE=1 SV=2	GDI2	1	3.45481e-10	142.1	QLICDPSYVK(1)DR	2	0.035798	3	1.362	1.493	1.492	0.71	0.717	0.68	0.485	3.5397e-05
Cellular Component	GO:0034774	11	secretory granule lumen	0.0223424	Q86VP6	1156	0.274	Q1	K	Cullin-associated NEDD8-dissociated protein 1 OS=Homo sapiens OX=9606 GN=CAND1 PE=1 SV=2	CAND1	1	0.0029114	109.66	ATCTTK(1)VK	2	-0.76433	1	1.718	1.882	1.712	0.446	0.471	0.538	0.274	3.721e-05
Cellular Component	GO:0034774	11	secretory granule lumen	0.0223424	P11216	370	0.402	Q1	K	Glycogen phosphorylase, brain form OS=Homo sapiens OX=9606 GN=PYGB PE=1 SV=5	PYGB	1	0.00904633	101.43	AWEITK(1)K	3	-0.31142	2	1.604	1.571	1.509	0.623	0.662	0.6	0.402	1.56336e-05
Cellular Component	GO:0034774	11	secretory granule lumen	0.0223424	P12268	242	0.477	Q1	K	Inosine-5'-monophosphate dehydrogenase 2 OS=Homo sapiens OX=9606 GN=IMPDH2 PE=1 SV=2	IMPDH2	1	7.99619e-10	116.13	K(1)QLLCGAAIGTHEDDKYR	4	-0.11491	2	1.559	1.417	1.411	0.705	0.718	0.668	0.477	4.2938e-05
Cellular Component	GO:0034774	11	secretory granule lumen	0.0223424	P08238	559	0.479	Q1	K	Heat shock protein HSP 90-beta OS=Homo sapiens OX=9606 GN=HSP90AB1 PE=1 SV=4	HSP90AB1	1	0.00072324	111.17	AK(1)FENLCK	3	-0.027707	2	1.508	1.469	1.398	0.714	0.677	0.704	0.479	1.56421e-05
Cellular Component	GO:0034774	11	secretory granule lumen	0.0223424	P08238	568	0.153	Q1	K	Heat shock protein HSP 90-beta OS=Homo sapiens OX=9606 GN=HSP90AB1 PE=1 SV=4	HSP90AB1	1	0.0129056	82.417	LMK(1)EILDK	2	-0.52759	1	2.117	2.005	1.986	0.335	0.306	0.291	0.153	1.0451e-06
Cellular Component	GO:0034774	11	secretory granule lumen	0.0223424	Q01469	55	0.389	Q1	K	Fatty acid-binding protein 5 OS=Homo sapiens OX=9606 GN=FABP5 PE=1 SV=3	FABP5	1	1.15862e-30	196.5	NLTIK(1)TESTLK	2	0.3101	1	1.584	1.581	1.576	0.618	0.585	0.642	0.389	0.00081888
Cellular Component	GO:0034774	11	secretory granule lumen	0.0223424	Q01469	82	0.479	Q1	K	Fatty acid-binding protein 5 OS=Homo sapiens OX=9606 GN=FABP5 PE=1 SV=3	FABP5	1	6.06434e-14	117.35	K(1)TQTVCNFTDGALVQHQEWDGK	4	-0.19745	2	1.462	1.481	1.43	0.725	0.704	0.666	0.479	1.53003e-05
Cellular Component	GO:0034774	11	secretory granule lumen	0.0223424	Q7Z6Z7	476	0.494	Q1	K	E3 ubiquitin-protein ligase HUWE1 OS=Homo sapiens OX=9606 GN=HUWE1 PE=1 SV=3	HUWE1	1	0.00238767	90.15	ECPFVIK(1)PK	3	-0.18576	2	1.503	1.397	1.415	0.66	0.686	0.785	0.494	0.00024261
Cellular Component	GO:0034774	11	secretory granule lumen	0.0223424	P14618	162	0.464	Q1	K	Pyruvate kinase PKM OS=Homo sapiens OX=9606 GN=PKM PE=1 SV=4	PKM	1	6.49953e-05	90.725	CDENILWLDYK(1)NICK	3	-0.11353	1	1.459	1.39	1.578	0.656	0.756	0.643	0.464	0.00025908
Cellular Component	GO:0034774	11	secretory granule lumen	0.0223424	P14618	322	0.414	Q1	K	Pyruvate kinase PKM OS=Homo sapiens OX=9606 GN=PKM PE=1 SV=4	PKM	1	4.11221e-09	110.12	AGK(1)PVICATQMLESMIK	3	0.3365	2	1.583	1.521	1.528	0.626	0.629	0.664	0.414	1.32e-06
Cellular Component	GO:0045240	9	dihydrolipoyl dehydrogenase complex	0.101136	P09622	66	0.426	Q1	K	Dihydrolipoyl dehydrogenase, mitochondrial OS=Homo sapiens OX=9606 GN=DLD PE=1 SV=2	DLD	1	6.84578e-17	148.57	AAQLGFK(1)TVCIEK	2	0.7406	2	1.537	1.514	1.534	0.697	0.632	0.626	0.426	0.00164226
Cellular Component	GO:0045240	9	dihydrolipoyl dehydrogenase complex	0.101136	Q02218	401	0.272	Q1	K	2-oxoglutarate dehydrogenase, mitochondrial OS=Homo sapiens OX=9606 GN=OGDH PE=1 SV=3	OGDH	1	0.00209311	68.972	AEQFYCGDTEGK(1)K	2	0.74858	1	1.697	1.793	1.836	0.505	0.541	0.405	0.272	0.000136433
Cellular Component	GO:0005871	11	kinesin complex	0.208434	Q9H0B6	369	0.384	Q1	K	Kinesin light chain 2 OS=Homo sapiens OX=9606 GN=KLC2 PE=1 SV=1	KLC2	1	2.76762e-08	142.38	TK(1)NNLASCYLK	2	-0.26727	1	1.643	1.509	1.614	0.598	0.596	0.637	0.384	4.6155e-06
Cellular Component	GO:0005871	11	kinesin complex	0.208434	P43034	360	0.433	Q1	K	Platelet-activating factor acetylhydrolase IB subunit alpha OS=Homo sapiens OX=9606 GN=PAFAH1B1 PE=1 SV=2	PAFAH1B1	1	0.00320332	72.705	FILSCADDK(1)TLR	2	0.75147	1	1.351	1.606	1.584	0.52	0.74	0.704	0.433	0.0023609
Cellular Component	GO:0044297	4	cell body	0.0698951	P23921	414	0.201	Q1	K	Ribonucleoside-diphosphate reductase large subunit OS=Homo sapiens OX=9606 GN=RRM1 PE=1 SV=1	RRM1	1	3.90941e-15	159.66	K(1)SNQQNLGTIK	2	0.94274	1	1.843	2.011	1.903	0.412	0.374	0.373	0.201	1.3358e-06
Cellular Component	GO:0044297	4	cell body	0.0698951	P21333	578	0.272	Q1	K	Filamin-A OS=Homo sapiens OX=9606 GN=FLNA PE=1 SV=4	FLNA	1	0.000120036	101.56	VGTECGNQK(1)VR	2	-0.21816	1	1.73	1.815	1.784	0.486	0.476	0.485	0.272	6.0056e-08
Cellular Component	GO:0044297	4	cell body	0.0698951	P21333	2000	0.359	Q1	K	Filamin-A OS=Homo sapiens OX=9606 GN=FLNA PE=1 SV=4	FLNA	1	0.0408648	66.692	EEPCLLK(1)R	2	-0.50213	1	1.675	1.62	1.586	0.582	0.588	0.583	0.359	1.8799e-07
Cellular Component	GO:0044297	4	cell body	0.0698951	P21333	1450	0.495	Q1	K	Filamin-A OS=Homo sapiens OX=9606 GN=FLNA PE=1 SV=4	FLNA	1	0.00011233	90.793	VPVHDVTDASK(1)VK	3	0.48724	1	1.479	1.441	1.393	0.691	0.679	0.764	0.495	6.2437e-05
Cellular Component	GO:0044297	4	cell body	0.0698951	P23528	45	0.342	Q1	K	Cofilin-1 OS=Homo sapiens OX=9606 GN=CFL1 PE=1 SV=3	CFL1	1	0.00127427	101.39	K(1)NIILEEGK	2	0.23308	5	1.734	1.655	1.576	0.555	0.587	0.557	0.342	2.6776e-06
Cellular Component	GO:0044297	4	cell body	0.0698951	P23528	44	0.401	Q1	K	Cofilin-1 OS=Homo sapiens OX=9606 GN=CFL1 PE=1 SV=3	CFL1	1	4.72599e-11	153.95	AVLFCLSEDK(1)K	2	-0.65835	3	1.595	1.575	1.523	0.642	0.654	0.585	0.401	1.80522e-05
Cellular Component	GO:0044297	4	cell body	0.0698951	P50991	292	0.438	Q1	K	T-complex protein 1 subunit delta OS=Homo sapiens OX=9606 GN=CCT4 PE=1 SV=4	CCT4	1	1.33037e-06	131.06	K(1)TGCNVLLIQK	2	-1.0315	3	1.553	1.521	1.461	0.65	0.647	0.688	0.438	3.2357e-06
Cellular Component	GO:0044297	4	cell body	0.0698951	Q7L576	516	0.465	Q1	K	Cytoplasmic FMR1-interacting protein 1 OS=Homo sapiens OX=9606 GN=CYFIP1 PE=1 SV=1	CYFIP1	1	2.47216e-06	84.107	K(1)TVCDWETGHEPFNDPALR	3	0.46049	1	1.526	1.529	1.372	0.613	0.778	0.666	0.465	0.00060253
Cellular Component	GO:0044297	4	cell body	0.0698951	Q14155	725	0.484	Q1	K	Rho guanine nucleotide exchange factor 7 OS=Homo sapiens OX=9606 GN=ARHGEF7 PE=1 SV=2	ARHGEF7	1	0.00865446	62.162	VIEAYCTSAK(1)TR	2	1.6091	1	1.645	1.352	1.365	0.703	0.725	0.683	0.484	0.00039998
Cellular Component	GO:0044297	4	cell body	0.0698951	Q9UD71	152	0.452	Q1	K	Protein phosphatase 1 regulatory subunit 1B OS=Homo sapiens OX=9606 GN=PPP1R1B PE=1 SV=2	PPP1R1B	1	4.97004e-20	100.86	QSAGQK(1)TTCGQGLEGPWERPPPLDESER	3	-0.61595	2	1.578	1.531	1.369	0.662	0.628	0.736	0.452	0.00023867
Cellular Component	GO:0044297	4	cell body	0.0698951	O95696	418	0.444	Q1	K	Bromodomain-containing protein 1 OS=Homo sapiens OX=9606 GN=BRD1 PE=1 SV=1	BRD1	1	0.00333527	96.143	ESSVK(1)TVR	2	-0.4281	2	1.549	1.478	1.482	0.669	0.649	0.686	0.444	1.6456e-06
Cellular Component	GO:0044297	4	cell body	0.0698951	P49368	44	0.396	Q1	K	T-complex protein 1 subunit gamma OS=Homo sapiens OX=9606 GN=CCT3 PE=1 SV=4	CCT3	1	0.00961247	68.515	TCLGPK(1)SMMK	3	-1.6047	3	1.529	1.536	1.644	0.644	0.607	0.613	0.396	3.166e-06
Cellular Component	GO:0044297	4	cell body	0.0698951	Q99497	62	0.381	Q1	K	Protein/nucleic acid deglycase DJ-1 OS=Homo sapiens OX=9606 GN=PARK7 PE=1 SV=2	PARK7	1	2.72946e-27	162.29	DVVICPDASLEDAK(1)K	2	-0.16613	1	1.505	1.635	1.635	0.609	0.57	0.638	0.381	2.1387e-05
Cellular Component	GO:0044297	4	cell body	0.0698951	Q14980	73	0.492	Q1	K	Nuclear mitotic apparatus protein 1 OS=Homo sapiens OX=9606 GN=NUMA1 PE=1 SV=2	NUMA1	1	0.000365798	79.652	K(1)HPSSPECLVSAQK	3	-1.1446	1	1.499	1.405	1.421	0.698	0.705	0.725	0.492	3.285e-06
Cellular Component	GO:0044297	4	cell body	0.0698951	Q14980	303	0.293	Q1	K	Nuclear mitotic apparatus protein 1 OS=Homo sapiens OX=9606 GN=NUMA1 PE=1 SV=2	NUMA1	1	3.57606e-05	134.13	QCQDLK(1)TEK	2	0.098392	2	1.777	1.74	1.697	0.489	0.495	0.545	0.293	2.4028e-06
Cellular Component	GO:0044297	4	cell body	0.0698951	P43034	360	0.433	Q1	K	Platelet-activating factor acetylhydrolase IB subunit alpha OS=Homo sapiens OX=9606 GN=PAFAH1B1 PE=1 SV=2	PAFAH1B1	1	0.00320332	72.705	FILSCADDK(1)TLR	2	0.75147	1	1.351	1.606	1.584	0.52	0.74	0.704	0.433	0.0023609
Cellular Component	GO:0044297	4	cell body	0.0698951	Q14573	258	0.471	Q1	K	Inositol 1,4,5-trisphosphate receptor type 3 OS=Homo sapiens OX=9606 GN=ITPR3 PE=1 SV=2	ITPR3	1	0.000333363	105.13	FLTCDEYK(1)GK	2	-1.2035	2	1.529	1.425	1.454	0.707	0.674	0.693	0.471	3.6728e-06
Cellular Component	GO:0033176	6	proton-transporting V-type ATPase complex	0.0558099	P38606	132	0.405	Q1	K	V-type proton ATPase catalytic subunit A OS=Homo sapiens OX=9606 GN=ATP6V1A PE=1 SV=2	ATP6V1A	1	0.000353207	107.09	DIK(1)WDFTPCK	2	-0.13164	2	1.639	1.537	1.502	0.652	0.641	0.6	0.405	1.77762e-05
Cellular Component	GO:0033176	6	proton-transporting V-type ATPase complex	0.0558099	P21281	109	0.48	Q1	K	V-type proton ATPase subunit B, brain isoform OS=Homo sapiens OX=9606 GN=ATP6V1B2 PE=1 SV=3	ATP6V1B2	1	0.000924525	87.718	K(1)TSCEFTGDILR	3	-0.37516	3	1.482	1.45	1.439	0.716	0.687	0.694	0.48	5.5611e-07
Cellular Component	GO:0030055	3	cell-substrate junction	0.00826868	P61158	240	0.393	Q1	K	Actin-related protein 3 OS=Homo sapiens OX=9606 GN=ACTR3 PE=1 SV=3	ACTR3	1	1.55569e-05	98.337	YSYVCPDLVK(1)EFNK	3	2.9551	2	1.592	1.567	1.567	0.63	0.614	0.613	0.393	4.4494e-08
Cellular Component	GO:0030055	3	cell-substrate junction	0.00826868	Q15149	4576	0.476	Q1	K	Plectin OS=Homo sapiens OX=9606 GN=PLEC PE=1 SV=3	PLEC	1	0.00380529	103.88	YLTCPK(1)TK	3	-0.20071	2	1.483	1.446	1.456	0.71	0.693	0.685	0.476	2.7992e-07
Cellular Component	GO:0030055	3	cell-substrate junction	0.00826868	P48059	297	0.481	Q1	K	LIM and senescent cell antigen-like-containing domain protein 1 OS=Homo sapiens OX=9606 GN=LIMS1 PE=1 SV=4	LIMS1	1	0.0200857	46.352	FVEFDMK(1)PVCK	3	-2.7639	1	1.461	1.531	1.372	0.673	0.745	0.681	0.481	8.2371e-05
Cellular Component	GO:0030055	3	cell-substrate junction	0.00826868	P11717	1285	0.431	Q1	K	Cation-independent mannose-6-phosphate receptor OS=Homo sapiens OX=9606 GN=IGF2R PE=1 SV=3	IGF2R	1	0.0187544	68.657	VVSSCQEK(1)R	2	-1.3987	1	1.571	1.542	1.451	0.618	0.683	0.664	0.431	2.2521e-05
Cellular Component	GO:0030055	3	cell-substrate junction	0.00826868	Q07020	97	0.479	Q1	K	60S ribosomal protein L18 OS=Homo sapiens OX=9606 GN=RPL18 PE=1 SV=2	RPL18	1	0.00960442	87.806	VQEVPK(1)LK	3	0.91036	2	1.47	1.582	1.32	0.718	0.67	0.706	0.479	0.00020176
Cellular Component	GO:0030055	3	cell-substrate junction	0.00826868	Q7L576	516	0.465	Q1	K	Cytoplasmic FMR1-interacting protein 1 OS=Homo sapiens OX=9606 GN=CYFIP1 PE=1 SV=1	CYFIP1	1	2.47216e-06	84.107	K(1)TVCDWETGHEPFNDPALR	3	0.46049	1	1.526	1.529	1.372	0.613	0.778	0.666	0.465	0.00060253
Cellular Component	GO:0030055	3	cell-substrate junction	0.00826868	P18206	316	0.374	Q1	K	Vinculin OS=Homo sapiens OX=9606 GN=VCL PE=1 SV=4	VCL	1	0.0100094	72.34	VGELCAGK(1)ER	2	-1.6995	1	1.722	1.618	1.478	0.627	0.582	0.593	0.374	3.9318e-05
Cellular Component	GO:0030055	3	cell-substrate junction	0.00826868	Q14155	725	0.484	Q1	K	Rho guanine nucleotide exchange factor 7 OS=Homo sapiens OX=9606 GN=ARHGEF7 PE=1 SV=2	ARHGEF7	1	0.00865446	62.162	VIEAYCTSAK(1)TR	2	1.6091	1	1.645	1.352	1.365	0.703	0.725	0.683	0.484	0.00039998
Cellular Component	GO:0030055	3	cell-substrate junction	0.00826868	P16144	834	0.349	Q1	K	Integrin beta-4 OS=Homo sapiens OX=9606 GN=ITGB4 PE=1 SV=5	ITGB4	1	1.56452e-06	115.12	LCTENLLK(1)PDTR	3	-0.48166	2	1.603	1.662	1.661	0.6	0.55	0.57	0.349	1.481e-06
Cellular Component	GO:0030055	3	cell-substrate junction	0.00826868	O00151	294	0.483	Q1	K	PDZ and LIM domain protein 1 OS=Homo sapiens OX=9606 GN=PDLIM1 PE=1 SV=4	PDLIM1	1	9.67413e-05	66.022	HPECYVCTDCGTNLK(1)QK	3	-1.3955	1	1.309	1.579	1.467	0.737	0.699	0.666	0.483	0.00030086
Cellular Component	GO:0030055	3	cell-substrate junction	0.00826868	Q9UNF0	167	0.456	Q1	K	Protein kinase C and casein kinase substrate in neurons protein 2 OS=Homo sapiens OX=9606 GN=PACSIN2 PE=1 SV=2	PACSIN2	1	0.00836713	89.827	EEK(1)LAISR	2	2.2291	1	1.553	1.528	1.383	0.68	0.649	0.706	0.456	5.8155e-05
Cellular Component	GO:0030055	3	cell-substrate junction	0.00826868	P61247	115	0.399	Q1	K	40S ribosomal protein S3a OS=Homo sapiens OX=9606 GN=RPS3A PE=1 SV=2	RPS3A	1	0.0142447	93.374	MCSMVK(1)K	2	0.47397	1	1.672	1.489	1.54	0.615	0.596	0.665	0.399	4.0891e-05
Cellular Component	GO:0030055	3	cell-substrate junction	0.00826868	P30101	94	0.42	Q1	K	Protein disulfide-isomerase A3 OS=Homo sapiens OX=9606 GN=PDIA3 PE=1 SV=4	PDIA3	1	3.5914e-41	161.47	VDCTANTNTCNK(1)YGVSGYPTLK	4	-0.65929	5	1.559	1.492	1.558	0.681	0.625	0.63	0.42	4.8366e-06
Cellular Component	GO:0030055	3	cell-substrate junction	0.00826868	P30101	415	0.45	Q1	K	Protein disulfide-isomerase A3 OS=Homo sapiens OX=9606 GN=PDIA3 PE=1 SV=4	PDIA3	1	0.0215894	85.676	NLEPK(1)YK	3	0.15336	4	1.566	1.535	1.386	0.673	0.669	0.679	0.45	0.0022784
Cellular Component	GO:0030055	3	cell-substrate junction	0.00826868	P30101	82	0.469	Q1	K	Protein disulfide-isomerase A3 OS=Homo sapiens OX=9606 GN=PDIA3 PE=1 SV=4	PDIA3	1	6.15521e-11	117.18	GIVPLAK(1)VDCTANTNTCNK	3	-0.14257	4	1.365	1.513	1.526	0.693	0.669	0.704	0.469	4.061e-05
Cellular Component	GO:0030055	3	cell-substrate junction	0.00826868	P84098	21	0.205	Q1	K	60S ribosomal protein L19 OS=Homo sapiens OX=9606 GN=RPL19 PE=1 SV=1	RPL19	1	5.79857e-05	79.62	K(1)VWLDPNETNEIANANSR	2	0.17639	2	1.99	1.872	1.878	0.357	0.357	0.46	0.205	5.5867e-05
Cellular Component	GO:0030055	3	cell-substrate junction	0.00826868	Q9Y490	2445	0.279	Q1	K	Talin-1 OS=Homo sapiens OX=9606 GN=TLN1 PE=1 SV=3	TLN1	1	2.8004e-05	114.7	VK(1)ADQDSEAMK	2	-0.094946	1	1.709	1.766	1.815	0.526	0.472	0.478	0.279	2.4271e-06
Cellular Component	GO:0030055	3	cell-substrate junction	0.00826868	P62937	49	0.371	Q1	K	Peptidyl-prolyl cis-trans isomerase A OS=Homo sapiens OX=9606 GN=PPIA PE=1 SV=2	PPIA	1	2.07978e-08	135.86	GFGYK(1)GSCFHR	2	-0.93186	3	1.604	1.598	1.62	0.613	0.593	0.585	0.371	1.3649e-07
Cellular Component	GO:0030055	3	cell-substrate junction	0.00826868	P62937	44	0.344	Q1	K	Peptidyl-prolyl cis-trans isomerase A OS=Homo sapiens OX=9606 GN=PPIA PE=1 SV=2	PPIA	1	4.67539e-18	164.68	ALSTGEK(1)GFGYK	2	0.16756	2	1.622	1.668	1.664	0.597	0.567	0.54	0.344	1.939e-06
Cellular Component	GO:0030055	3	cell-substrate junction	0.00826868	O60504	486	0.36	Q1	K	Vinexin OS=Homo sapiens OX=9606 GN=SORBS3 PE=1 SV=2	SORBS3	1	0.0003411	104.59	K(1)VNENWYEGR	2	-0.48362	1	1.555	1.614	1.702	0.592	0.598	0.565	0.36	2.7089e-06
Cellular Component	GO:0030055	3	cell-substrate junction	0.00826868	P21333	578	0.272	Q1	K	Filamin-A OS=Homo sapiens OX=9606 GN=FLNA PE=1 SV=4	FLNA	1	0.000120036	101.56	VGTECGNQK(1)VR	2	-0.21816	1	1.73	1.815	1.784	0.486	0.476	0.485	0.272	6.0056e-08
Cellular Component	GO:0030055	3	cell-substrate junction	0.00826868	P21333	2000	0.359	Q1	K	Filamin-A OS=Homo sapiens OX=9606 GN=FLNA PE=1 SV=4	FLNA	1	0.0408648	66.692	EEPCLLK(1)R	2	-0.50213	1	1.675	1.62	1.586	0.582	0.588	0.583	0.359	1.8799e-07
Cellular Component	GO:0030055	3	cell-substrate junction	0.00826868	P21333	1450	0.495	Q1	K	Filamin-A OS=Homo sapiens OX=9606 GN=FLNA PE=1 SV=4	FLNA	1	0.00011233	90.793	VPVHDVTDASK(1)VK	3	0.48724	1	1.479	1.441	1.393	0.691	0.679	0.764	0.495	6.2437e-05
Cellular Component	GO:0030055	3	cell-substrate junction	0.00826868	Q9ULV4	194	0.308	Q1	K	Coronin-1C OS=Homo sapiens OX=9606 GN=CORO1C PE=1 SV=1	CORO1C	1	0.00320052	69.261	NGSLICTASK(1)DK	2	1.4005	2	1.663	1.722	1.748	0.55	0.503	0.528	0.308	1.2137e-06
Cellular Component	GO:0030055	3	cell-substrate junction	0.00826868	P35579	180	0.355	Q1	K	Myosin-9 OS=Homo sapiens OX=9606 GN=MYH9 PE=1 SV=4	MYH9	1	5.30441e-22	143.04	EDQSILCTGESGAGK(1)TENTK	3	-0.56027	1	1.567	1.76	1.57	0.594	0.577	0.566	0.355	1.72257e-05
Cellular Component	GO:0030055	3	cell-substrate junction	0.00826868	P35579	565	0.403	Q1	K	Myosin-9 OS=Homo sapiens OX=9606 GN=MYH9 PE=1 SV=4	MYH9	1	0.00243053	54.898	DK(1)ADFCIIHYAGK	3	-0.65742	1	1.575	1.478	1.63	0.589	0.674	0.622	0.403	4.3735e-05
Cellular Component	GO:0030055	3	cell-substrate junction	0.00826868	P23528	45	0.342	Q1	K	Cofilin-1 OS=Homo sapiens OX=9606 GN=CFL1 PE=1 SV=3	CFL1	1	0.00127427	101.39	K(1)NIILEEGK	2	0.23308	5	1.734	1.655	1.576	0.555	0.587	0.557	0.342	2.6776e-06
Cellular Component	GO:0030055	3	cell-substrate junction	0.00826868	P23528	44	0.401	Q1	K	Cofilin-1 OS=Homo sapiens OX=9606 GN=CFL1 PE=1 SV=3	CFL1	1	4.72599e-11	153.95	AVLFCLSEDK(1)K	2	-0.65835	3	1.595	1.575	1.523	0.642	0.654	0.585	0.401	1.80522e-05
Cellular Component	GO:0030055	3	cell-substrate junction	0.00826868	Q9UGI8	298	0.217	Q1	K	Testin OS=Homo sapiens OX=9606 GN=TES PE=1 SV=1	TES	1	3.73675e-13	166.07	HYCDSEK(1)PR	3	0.6008	8	1.881	1.913	1.862	0.403	0.431	0.396	0.217	2.9262e-07
Cellular Component	GO:0030055	3	cell-substrate junction	0.00826868	Q9UGI8	193	0.341	Q1	K	Testin OS=Homo sapiens OX=9606 GN=TES PE=1 SV=1	TES	1	4.13503e-16	122.94	SEALGVGDVK(1)LPCEMDAQGPK	3	-2.5135	2	1.645	1.632	1.689	0.561	0.583	0.549	0.341	3.8677e-07
Cellular Component	GO:0030055	3	cell-substrate junction	0.00826868	P50395	418	0.372	Q1	K	Rab GDP dissociation inhibitor beta OS=Homo sapiens OX=9606 GN=GDI2 PE=1 SV=2	GDI2	1	7.11675e-30	154.74	TYDATTHFETTCDDIK(1)NIYK	3	-0.58508	2	1.621	1.595	1.605	0.615	0.593	0.585	0.372	1.8781e-07
Cellular Component	GO:0030055	3	cell-substrate junction	0.00826868	P50395	288	0.485	Q1	K	Rab GDP dissociation inhibitor beta OS=Homo sapiens OX=9606 GN=GDI2 PE=1 SV=2	GDI2	1	3.45481e-10	142.1	QLICDPSYVK(1)DR	2	0.035798	3	1.362	1.493	1.492	0.71	0.717	0.68	0.485	3.5397e-05
Cellular Component	GO:0030055	3	cell-substrate junction	0.00826868	P50570	90	0.247	Q1	K	Dynamin-2 OS=Homo sapiens OX=9606 GN=DNM2 PE=1 SV=2	DNM2	1	0.007979	78.342	K(1)FTDFDEVR	2	-0.55845	1	1.768	1.787	1.917	0.504	0.415	0.435	0.247	2.2772e-05
Cellular Component	GO:0030055	3	cell-substrate junction	0.00826868	P39023	136	0.473	Q1	K	60S ribosomal protein L3 OS=Homo sapiens OX=9606 GN=RPL3 PE=1 SV=2	RPL3	1	0.00322946	107.79	K(1)WQDEDGK	2	0.81854	2	1.454	1.503	1.438	0.696	0.723	0.66	0.473	1.7225e-05
Cellular Component	GO:0030055	3	cell-substrate junction	0.00826868	P39023	341	0.377	Q1	K	60S ribosomal protein L3 OS=Homo sapiens OX=9606 GN=RPL3 PE=1 SV=2	RPL3	1	0.0219442	76.679	GCVVGTK(1)K	3	-1.1525	2	1.633	1.637	1.526	0.635	0.545	0.63	0.377	5.9053e-05
Cellular Component	GO:0030055	3	cell-substrate junction	0.00826868	Q14847	50	0.459	Q1	K	LIM and SH3 domain protein 1 OS=Homo sapiens OX=9606 GN=LASP1 PE=1 SV=2	LASP1	1	0.010633	57.785	K(1)PYCNAHYPK	3	-0.53436	2	1.432	1.49	1.529	0.706	0.675	0.66	0.459	4.5956e-06
Cellular Component	GO:0030055	3	cell-substrate junction	0.00826868	P61353	27	0.453	Q1	K	60S ribosomal protein L27 OS=Homo sapiens OX=9606 GN=RPL27 PE=1 SV=2	RPL27	1	4.28975e-16	101.04	AVIVK(1)NIDDGTSDRPYSHALVAGIDR	4	-0.46362	1	1.572	1.472	1.433	0.657	0.722	0.649	0.453	5.6665e-05
Cellular Component	GO:0030055	3	cell-substrate junction	0.00826868	P07237	308	0.278	Q1	K	Protein disulfide-isomerase OS=Homo sapiens OX=9606 GN=P4HB PE=1 SV=3	P4HB	1	0.00332344	86.898	ILEFFGLK(1)K	3	-0.031928	2	1.755	1.698	1.841	0.452	0.513	0.506	0.278	1.51387e-05
Cellular Component	GO:0030055	3	cell-substrate junction	0.00826868	P07237	309	0.424	Q1	K	Protein disulfide-isomerase OS=Homo sapiens OX=9606 GN=P4HB PE=1 SV=3	P4HB	1	0.00170122	121.64	K(1)EECPAVR	3	0.4143	2	1.6	1.521	1.471	0.613	0.641	0.691	0.424	3.7866e-05
Cellular Component	GO:0030055	3	cell-substrate junction	0.00826868	P13861	379	0.477	Q1	K	cAMP-dependent protein kinase type II-alpha regulatory subunit OS=Homo sapiens OX=9606 GN=PRKAR2A PE=1 SV=2	PRKAR2A	1	0.00222902	71.03	LLGPCMDIMK(1)R	3	-0.51879	2	1.403	1.491	1.483	0.719	0.659	0.711	0.477	2.2538e-05
Cellular Component	GO:0030055	3	cell-substrate junction	0.00826868	P35221	120	0.488	Q1	K	Catenin alpha-1 OS=Homo sapiens OX=9606 GN=CTNNA1 PE=1 SV=1	CTNNA1	1	5.50199e-08	107.82	AAAGEFADDPCSSVK(1)R	2	-0.12176	1	1.365	1.42	1.547	0.7	0.659	0.755	0.488	0.000182432
Cellular Component	GO:0030055	3	cell-substrate junction	0.00826868	P62701	120	0.464	Q1	K	40S ribosomal protein S4, X isoform OS=Homo sapiens OX=9606 GN=RPS4X PE=1 SV=2	RPS4X	1	0.001407	96.342	ITPEEAK(1)YK	2	0.314	3	1.488	1.467	1.475	0.722	0.668	0.667	0.464	0.00118412
Cellular Component	GO:0030055	3	cell-substrate junction	0.00826868	Q8WUM4	234	0.284	Q1	K	Programmed cell death 6-interacting protein OS=Homo sapiens OX=9606 GN=PDCD6IP PE=1 SV=1	PDCD6IP	1	4.05874e-05	122.7	QCQYK(1)DTLPK	2	-2.2661	2	1.797	1.8	1.665	0.489	0.513	0.495	0.284	9.0293e-07
Cellular Component	GO:0005721	12	pericentric heterochromatin	0.152938	O75367	304	0.372	Q1	K	Core histone macro-H2A.1 OS=Homo sapiens OX=9606 GN=H2AFY PE=1 SV=4	H2AFY	1	0.000144859	116.24	NCLALADDK(1)K	2	0.39339	2	1.634	1.692	1.494	0.556	0.613	0.622	0.372	4.0974e-05
Cellular Component	GO:0005721	12	pericentric heterochromatin	0.152938	P26358	1004	0.462	Q1	K	DNA (cytosine-5)-methyltransferase 1 OS=Homo sapiens OX=9606 GN=DNMT1 PE=1 SV=2	DNMT1	1	0.00280758	68.972	K(1)SNGRPNETDIK	3	-1.3658	1	1.492	1.447	1.501	0.685	0.719	0.646	0.462	1.97721e-05
Cellular Component	GO:0097165	10	nuclear stress granule	0.0558099	Q08211	467	0.496	Q1	K	ATP-dependent RNA helicase A OS=Homo sapiens OX=9606 GN=DHX9 PE=1 SV=4	DHX9	1	5.82684e-13	138.19	GEEPGK(1)SCGYSVR	2	0.64535	1	1.347	1.5	1.457	0.733	0.662	0.74	0.496	0.000123788
Cellular Component	GO:0097165	10	nuclear stress granule	0.0558099	Q92797	684	0.342	Q1	K	Symplekin OS=Homo sapiens OX=9606 GN=SYMPK PE=1 SV=2	SYMPK	1	0.0226227	76.282	K(1)YCEDESR	2	0.04773	1	1.777	1.569	1.621	0.525	0.593	0.579	0.342	3.7122e-05
Cellular Component	GO:0031012	4	extracellular matrix	0.00278471	P15924	2778	0.393	Q1	K	Desmoplakin OS=Homo sapiens OX=9606 GN=DSP PE=1 SV=3	DSP	1	0.00540315	95.775	ILTCPK(1)TK	3	0.28722	2	1.629	1.493	1.603	0.599	0.624	0.634	0.393	3.948e-06
Cellular Component	GO:0031012	4	extracellular matrix	0.00278471	P15924	1144	0.478	Q1	K	Desmoplakin OS=Homo sapiens OX=9606 GN=DSP PE=1 SV=3	DSP	1	0.00870934	73.881	NDYDQLQK(1)AR	2	0.6607	1	1.452	1.523	1.398	0.634	0.744	0.711	0.478	0.000159996
Cellular Component	GO:0031012	4	extracellular matrix	0.00278471	P15924	1073	0.268	Q1	K	Desmoplakin OS=Homo sapiens OX=9606 GN=DSP PE=1 SV=3	DSP	1	0.00126733	75.102	YQAECSQFK(1)AK	2	-0.57564	2	1.782	1.777	1.795	0.487	0.466	0.48	0.268	3.1201e-08
Cellular Component	GO:0031012	4	extracellular matrix	0.00278471	P15924	478	0.411	Q1	K	Desmoplakin OS=Homo sapiens OX=9606 GN=DSP PE=1 SV=3	DSP	1	0.000142635	91.961	IVHK(1)GDECILK	3	0.58642	1	1.575	1.541	1.528	0.623	0.661	0.627	0.411	9.0198e-07
Cellular Component	GO:0031012	4	extracellular matrix	0.00278471	Q15149	4576	0.476	Q1	K	Plectin OS=Homo sapiens OX=9606 GN=PLEC PE=1 SV=3	PLEC	1	0.00380529	103.88	YLTCPK(1)TK	3	-0.20071	2	1.483	1.446	1.456	0.71	0.693	0.685	0.476	2.7992e-07
Cellular Component	GO:0031012	4	extracellular matrix	0.00278471	Q00839	495	0.459	Q1	K	Heterogeneous nuclear ribonucleoprotein U OS=Homo sapiens OX=9606 GN=HNRNPU PE=1 SV=6	HNRNPU	1	0.000338111	63.691	K(1)DCEVVMMIGLPGAGK	3	-1.0615	2	1.4	1.528	1.52	0.711	0.636	0.694	0.459	6.0225e-05
Cellular Component	GO:0031012	4	extracellular matrix	0.00278471	Q00839	387	0.38	Q1	K	Heterogeneous nuclear ribonucleoprotein U OS=Homo sapiens OX=9606 GN=HNRNPU PE=1 SV=6	HNRNPU	1	5.34412e-06	99.344	GIK(1)TCNCETEDYGEK	3	0.12476	1	1.496	1.565	1.715	0.555	0.687	0.573	0.38	0.00023794
Cellular Component	GO:0031012	4	extracellular matrix	0.00278471	Q00839	565	0.42	Q1	K	Heterogeneous nuclear ribonucleoprotein U OS=Homo sapiens OX=9606 GN=HNRNPU PE=1 SV=6	HNRNPU	1	6.4142e-07	108.09	APQCLGK(1)FIEIAAR	2	-1.2209	2	1.588	1.557	1.462	0.609	0.626	0.7	0.42	6.0565e-05
Cellular Component	GO:0031012	4	extracellular matrix	0.00278471	Q00839	609	0.321	Q1	K	Heterogeneous nuclear ribonucleoprotein U OS=Homo sapiens OX=9606 GN=HNRNPU PE=1 SV=6	HNRNPU	1	2.39004e-06	111.79	AVVVCPK(1)DEDYK	2	0.46828	2	1.735	1.64	1.692	0.524	0.563	0.54	0.321	8.752e-07
Cellular Component	GO:0031012	4	extracellular matrix	0.00278471	P04843	538	0.417	Q1	K	Dolichyl-diphosphooligosaccharide--protein glycosyltransferase subunit 1 OS=Homo sapiens OX=9606 GN=RPN1 PE=1 SV=1	RPN1	1	0.000596927	91.62	LK(1)TEGSDLCDR	3	-0.056382	2	1.554	1.514	1.55	0.636	0.655	0.637	0.417	1.3213e-07
Cellular Component	GO:0031012	4	extracellular matrix	0.00278471	P40227	287	0.454	Q1	K	T-complex protein 1 subunit zeta OS=Homo sapiens OX=9606 GN=CCT6A PE=1 SV=3	CCT6A	1	1.76708e-06	104.55	VCGDSDK(1)GFVVINQK	3	-0.21642	1	1.491	1.647	1.328	0.635	0.687	0.707	0.454	0.00035906
Cellular Component	GO:0031012	4	extracellular matrix	0.00278471	P61247	115	0.399	Q1	K	40S ribosomal protein S3a OS=Homo sapiens OX=9606 GN=RPS3A PE=1 SV=2	RPS3A	1	0.0142447	93.374	MCSMVK(1)K	2	0.47397	1	1.672	1.489	1.54	0.615	0.596	0.665	0.399	4.0891e-05
Cellular Component	GO:0031012	4	extracellular matrix	0.00278471	P62913	154	0.444	Q1	K	60S ribosomal protein L11 OS=Homo sapiens OX=9606 GN=RPL11 PE=1 SV=2	RPL11	1	0.00103955	91.265	TGCIGAK(1)HR	2	2.3436	4	1.448	1.571	1.488	0.692	0.657	0.653	0.444	1.57191e-05
Cellular Component	GO:0031012	4	extracellular matrix	0.00278471	P62913	78	0.41	Q1	K	60S ribosomal protein L11 OS=Homo sapiens OX=9606 GN=RPL11 PE=1 SV=2	RPL11	1	0.000209308	113.24	GAK(1)AEEILEK	3	-0.66035	2	1.542	1.548	1.561	0.673	0.623	0.613	0.41	0.00105979
Cellular Component	GO:0031012	4	extracellular matrix	0.00278471	P23246	291	0.362	Q1	K	Splicing factor, proline- and glutamine-rich OS=Homo sapiens OX=9606 GN=SFPQ PE=1 SV=2	SFPQ	1	8.40845e-05	98.156	RPGEK(1)TYTQR	3	-0.73735	1	1.495	1.709	1.664	0.668	0.613	0.48	0.362	0.0006635
Cellular Component	GO:0031012	4	extracellular matrix	0.00278471	P78527	117	0.428	Q1	K	DNA-dependent protein kinase catalytic subunit OS=Homo sapiens OX=9606 GN=PRKDC PE=1 SV=3	PRKDC	1	0.00114791	88.075	NTCTSVYTK(1)DR	2	2.0058	1	1.369	1.529	1.672	0.637	0.733	0.584	0.428	0.0006389
Cellular Component	GO:0031012	4	extracellular matrix	0.00278471	P62826	123	0.484	Q1	K	GTP-binding nuclear protein Ran OS=Homo sapiens OX=9606 GN=RAN PE=1 SV=3	RAN	1	1.12796e-19	139.29	VCENIPIVLCGNK(1)VDIK	3	-0.81793	3	1.435	1.493	1.423	0.688	0.703	0.715	0.484	1.2707e-06
Cellular Component	GO:0031012	4	extracellular matrix	0.00278471	Q9UQE7	977	0.44	Q1	K	Structural maintenance of chromosomes protein 3 OS=Homo sapiens OX=9606 GN=SMC3 PE=1 SV=2	SMC3	0.99997	0.0237068	46.88	KLEQCNTELK(1)K	3	1.6771	1	1.475	1.481	1.565	0.661	0.655	0.674	0.44	1.2541e-06
Cellular Component	GO:0031012	4	extracellular matrix	0.00278471	P21333	578	0.272	Q1	K	Filamin-A OS=Homo sapiens OX=9606 GN=FLNA PE=1 SV=4	FLNA	1	0.000120036	101.56	VGTECGNQK(1)VR	2	-0.21816	1	1.73	1.815	1.784	0.486	0.476	0.485	0.272	6.0056e-08
Cellular Component	GO:0031012	4	extracellular matrix	0.00278471	P21333	2000	0.359	Q1	K	Filamin-A OS=Homo sapiens OX=9606 GN=FLNA PE=1 SV=4	FLNA	1	0.0408648	66.692	EEPCLLK(1)R	2	-0.50213	1	1.675	1.62	1.586	0.582	0.588	0.583	0.359	1.8799e-07
Cellular Component	GO:0031012	4	extracellular matrix	0.00278471	P21333	1450	0.495	Q1	K	Filamin-A OS=Homo sapiens OX=9606 GN=FLNA PE=1 SV=4	FLNA	1	0.00011233	90.793	VPVHDVTDASK(1)VK	3	0.48724	1	1.479	1.441	1.393	0.691	0.679	0.764	0.495	6.2437e-05
Cellular Component	GO:0031012	4	extracellular matrix	0.00278471	P60866	75	0.275	Q1	K	40S ribosomal protein S20 OS=Homo sapiens OX=9606 GN=RPS20 PE=1 SV=1	RPS20	1	8.01101e-18	159.66	TPCGEGSK(1)TWDR	3	-0.32467	3	1.784	1.772	1.76	0.514	0.469	0.478	0.275	0.00047771
Cellular Component	GO:0031012	4	extracellular matrix	0.00278471	P13639	571	0.45	Q1	K	Elongation factor 2 OS=Homo sapiens OX=9606 GN=EEF2 PE=1 SV=4	EEF2	1	3.14699e-17	154.28	DLEEDHACIPIK(1)K	2	-0.69618	3	1.467	1.535	1.479	0.652	0.65	0.715	0.45	1.99925e-05
Cellular Component	GO:0031012	4	extracellular matrix	0.00278471	P13639	594	0.491	Q1	K	Elongation factor 2 OS=Homo sapiens OX=9606 GN=EEF2 PE=1 SV=4	EEF2	1	1.69803e-09	110.12	ETVSEESNVLCLSK(1)SPNK	3	-0.52971	1	1.437	1.587	1.307	0.754	0.662	0.709	0.491	0.00046028
Cellular Component	GO:0031012	4	extracellular matrix	0.00278471	P35579	180	0.355	Q1	K	Myosin-9 OS=Homo sapiens OX=9606 GN=MYH9 PE=1 SV=4	MYH9	1	5.30441e-22	143.04	EDQSILCTGESGAGK(1)TENTK	3	-0.56027	1	1.567	1.76	1.57	0.594	0.577	0.566	0.355	1.72257e-05
Cellular Component	GO:0031012	4	extracellular matrix	0.00278471	P35579	565	0.403	Q1	K	Myosin-9 OS=Homo sapiens OX=9606 GN=MYH9 PE=1 SV=4	MYH9	1	0.00243053	54.898	DK(1)ADFCIIHYAGK	3	-0.65742	1	1.575	1.478	1.63	0.589	0.674	0.622	0.403	4.3735e-05
Cellular Component	GO:0031012	4	extracellular matrix	0.00278471	P23528	45	0.342	Q1	K	Cofilin-1 OS=Homo sapiens OX=9606 GN=CFL1 PE=1 SV=3	CFL1	1	0.00127427	101.39	K(1)NIILEEGK	2	0.23308	5	1.734	1.655	1.576	0.555	0.587	0.557	0.342	2.6776e-06
Cellular Component	GO:0031012	4	extracellular matrix	0.00278471	P23528	44	0.401	Q1	K	Cofilin-1 OS=Homo sapiens OX=9606 GN=CFL1 PE=1 SV=3	CFL1	1	4.72599e-11	153.95	AVLFCLSEDK(1)K	2	-0.65835	3	1.595	1.575	1.523	0.642	0.654	0.585	0.401	1.80522e-05
Cellular Component	GO:0031012	4	extracellular matrix	0.00278471	Q06830	178	0.453	Q1	K	Peroxiredoxin-1 OS=Homo sapiens OX=9606 GN=PRDX1 PE=1 SV=1	PRDX1	0.999997	5.6436e-11	97.69	HGEVCPAGWK(1)PGSDTIKPDVQK	5	0.01739	4	1.498	1.509	1.469	0.721	0.688	0.619	0.453	6.26e-05
Cellular Component	GO:0031012	4	extracellular matrix	0.00278471	P17844	197	0.252	Q1	K	Probable ATP-dependent RNA helicase DDX5 OS=Homo sapiens OX=9606 GN=DDX5 PE=1 SV=1	DDX5	1	7.68943e-05	102.9	LK(1)STCIYGGAPK	3	-1.9744	2	1.857	1.777	1.81	0.443	0.473	0.458	0.252	2.2599e-07
Cellular Component	GO:0031012	4	extracellular matrix	0.00278471	P17844	351	0.391	Q1	K	Probable ATP-dependent RNA helicase DDX5 OS=Homo sapiens OX=9606 GN=DDX5 PE=1 SV=1	DDX5	1	0.00120581	112.36	TIVFVETK(1)R	2	-0.61373	2	1.629	1.536	1.571	0.611	0.645	0.596	0.391	2.686e-06
Cellular Component	GO:0031012	4	extracellular matrix	0.00278471	P40939	60	0.394	Q1	K	Trifunctional enzyme subunit alpha, mitochondrial OS=Homo sapiens OX=9606 GN=HADHA PE=1 SV=2	HADHA	1	0.000326831	92.38	INSPNSK(1)VNTLSK	2	1.332	1	1.576	1.647	1.499	0.632	0.583	0.645	0.394	2.1245e-05
Cellular Component	GO:0031012	4	extracellular matrix	0.00278471	P40939	353	0.198	Q1	K	Trifunctional enzyme subunit alpha, mitochondrial OS=Homo sapiens OX=9606 GN=HADHA PE=1 SV=2	HADHA	1	0.00293526	99.442	NK(1)FGAPQK	3	-0.27395	2	2.008	1.903	1.879	0.398	0.379	0.367	0.198	4.0698e-07
Cellular Component	GO:0031012	4	extracellular matrix	0.00278471	P40939	644	0.486	Q1	K	Trifunctional enzyme subunit alpha, mitochondrial OS=Homo sapiens OX=9606 GN=HADHA PE=1 SV=2	HADHA	1	4.34993e-05	101.89	GFYIYQEGVK(1)R	2	-1.1374	3	1.474	1.433	1.437	0.671	0.714	0.728	0.486	1.51598e-05
Cellular Component	GO:0031012	4	extracellular matrix	0.00278471	P40939	411	0.18	Q1	K	Trifunctional enzyme subunit alpha, mitochondrial OS=Homo sapiens OX=9606 GN=HADHA PE=1 SV=2	HADHA	1	0.0197409	87.476	GLNDK(1)VK	2	-0.16327	1	2.009	2.02	1.874	0.359	0.375	0.331	0.18	1.2788e-06
Cellular Component	GO:0031012	4	extracellular matrix	0.00278471	P61353	27	0.453	Q1	K	60S ribosomal protein L27 OS=Homo sapiens OX=9606 GN=RPL27 PE=1 SV=2	RPL27	1	4.28975e-16	101.04	AVIVK(1)NIDDGTSDRPYSHALVAGIDR	4	-0.46362	1	1.572	1.472	1.433	0.657	0.722	0.649	0.453	5.6665e-05
Cellular Component	GO:0031012	4	extracellular matrix	0.00278471	P52272	651	0.461	Q1	K	Heterogeneous nuclear ribonucleoprotein M OS=Homo sapiens OX=9606 GN=HNRNPM PE=1 SV=3	HNRNPM	1	0.00449966	101.25	K(1)ACQIFVR	2	0.83942	1	1.564	1.465	1.42	0.742	0.669	0.64	0.461	0.000119993
Cellular Component	GO:0031012	4	extracellular matrix	0.00278471	P52272	698	0.258	Q1	K	Heterogeneous nuclear ribonucleoprotein M OS=Homo sapiens OX=9606 GN=HNRNPM PE=1 SV=3	HNRNPM	1	4.83172e-06	105.28	GCGVVK(1)FESPEVAER	3	-0.2701	5	1.819	1.824	1.767	0.461	0.488	0.447	0.258	5.1747e-07
Cellular Component	GO:0031012	4	extracellular matrix	0.00278471	P07237	308	0.278	Q1	K	Protein disulfide-isomerase OS=Homo sapiens OX=9606 GN=P4HB PE=1 SV=3	P4HB	1	0.00332344	86.898	ILEFFGLK(1)K	3	-0.031928	2	1.755	1.698	1.841	0.452	0.513	0.506	0.278	1.51387e-05
Cellular Component	GO:0031012	4	extracellular matrix	0.00278471	P07237	309	0.424	Q1	K	Protein disulfide-isomerase OS=Homo sapiens OX=9606 GN=P4HB PE=1 SV=3	P4HB	1	0.00170122	121.64	K(1)EECPAVR	3	0.4143	2	1.6	1.521	1.471	0.613	0.641	0.691	0.424	3.7866e-05
Cellular Component	GO:0031012	4	extracellular matrix	0.00278471	P14618	162	0.464	Q1	K	Pyruvate kinase PKM OS=Homo sapiens OX=9606 GN=PKM PE=1 SV=4	PKM	1	6.49953e-05	90.725	CDENILWLDYK(1)NICK	3	-0.11353	1	1.459	1.39	1.578	0.656	0.756	0.643	0.464	0.00025908
Cellular Component	GO:0031012	4	extracellular matrix	0.00278471	P14618	322	0.414	Q1	K	Pyruvate kinase PKM OS=Homo sapiens OX=9606 GN=PKM PE=1 SV=4	PKM	1	4.11221e-09	110.12	AGK(1)PVICATQMLESMIK	3	0.3365	2	1.583	1.521	1.528	0.626	0.629	0.664	0.414	1.32e-06
Cellular Component	GO:0031012	4	extracellular matrix	0.00278471	P62701	120	0.464	Q1	K	40S ribosomal protein S4, X isoform OS=Homo sapiens OX=9606 GN=RPS4X PE=1 SV=2	RPS4X	1	0.001407	96.342	ITPEEAK(1)YK	2	0.314	3	1.488	1.467	1.475	0.722	0.668	0.667	0.464	0.00118412
Cellular Component	GO:0005758	11	mitochondrial intermembrane space	0.252358	P51970	38	0.266	Q1	K	NADH dehydrogenase [ubiquinone] 1 alpha subcomplex subunit 8 OS=Homo sapiens OX=9606 GN=NDUFA8 PE=1 SV=3	NDUFA8	1	0.00170306	54.09	AAAHHYGAQCDK(1)PNK	3	-0.081265	3	1.827	1.722	1.816	0.446	0.503	0.476	0.266	2.3488e-06
Cellular Component	GO:0005758	11	mitochondrial intermembrane space	0.252358	P50440	55	0.311	Q1	K	Glycine amidinotransferase, mitochondrial OS=Homo sapiens OX=9606 GN=GATM PE=1 SV=1	GATM	1	3.3852e-05	94.203	NSCAADDK(1)ATEPLPK	2	0.013338	2	1.63	1.844	1.642	0.525	0.511	0.553	0.311	1.72561e-05
Cellular Component	GO:0005758	11	mitochondrial intermembrane space	0.252358	Q99497	62	0.381	Q1	K	Protein/nucleic acid deglycase DJ-1 OS=Homo sapiens OX=9606 GN=PARK7 PE=1 SV=2	PARK7	1	2.72946e-27	162.29	DVVICPDASLEDAK(1)K	2	-0.16613	1	1.505	1.635	1.635	0.609	0.57	0.638	0.381	2.1387e-05
Cellular Component	GO:0005758	11	mitochondrial intermembrane space	0.252358	Q14061	30	0.314	Q1	K	Cytochrome c oxidase copper chaperone OS=Homo sapiens OX=9606 GN=COX17 PE=1 SV=2	COX17	1	0.000242026	75.911	KPLKPCCACPETK(1)K	4	0.22637	1	1.732	1.742	1.627	0.497	0.553	0.553	0.314	1.50298e-05
Cellular Component	GO:0101031	4	chaperone complex	0.127008	P40227	287	0.454	Q1	K	T-complex protein 1 subunit zeta OS=Homo sapiens OX=9606 GN=CCT6A PE=1 SV=3	CCT6A	1	1.76708e-06	104.55	VCGDSDK(1)GFVVINQK	3	-0.21642	1	1.491	1.647	1.328	0.635	0.687	0.707	0.454	0.00035906
Cellular Component	GO:0101031	4	chaperone complex	0.127008	P49368	44	0.396	Q1	K	T-complex protein 1 subunit gamma OS=Homo sapiens OX=9606 GN=CCT3 PE=1 SV=4	CCT3	1	0.00961247	68.515	TCLGPK(1)SMMK	3	-1.6047	3	1.529	1.536	1.644	0.644	0.607	0.613	0.396	3.166e-06
Cellular Component	GO:0101031	4	chaperone complex	0.127008	P50991	292	0.438	Q1	K	T-complex protein 1 subunit delta OS=Homo sapiens OX=9606 GN=CCT4 PE=1 SV=4	CCT4	1	1.33037e-06	131.06	K(1)TGCNVLLIQK	2	-1.0315	3	1.553	1.521	1.461	0.65	0.647	0.688	0.438	3.2357e-06
Cellular Component	GO:0005903	5	brush border	0.0367033	P61158	240	0.393	Q1	K	Actin-related protein 3 OS=Homo sapiens OX=9606 GN=ACTR3 PE=1 SV=3	ACTR3	1	1.55569e-05	98.337	YSYVCPDLVK(1)EFNK	3	2.9551	2	1.592	1.567	1.567	0.63	0.614	0.613	0.393	4.4494e-08
Cellular Component	GO:0005903	5	brush border	0.0367033	O00299	166	0.49	Q1	K	Chloride intracellular channel protein 1 OS=Homo sapiens OX=9606 GN=CLIC1 PE=1 SV=4	CLIC1	1	3.02602e-14	127.32	K(1)FLDGNELTLADCNLLPK	3	0.41049	1	1.504	1.463	1.365	0.706	0.645	0.77	0.49	0.00025982
Cellular Component	GO:0005903	5	brush border	0.0367033	Q15149	4576	0.476	Q1	K	Plectin OS=Homo sapiens OX=9606 GN=PLEC PE=1 SV=3	PLEC	1	0.00380529	103.88	YLTCPK(1)TK	3	-0.20071	2	1.483	1.446	1.456	0.71	0.693	0.685	0.476	2.7992e-07
Cellular Component	GO:0005903	5	brush border	0.0367033	P08238	559	0.479	Q1	K	Heat shock protein HSP 90-beta OS=Homo sapiens OX=9606 GN=HSP90AB1 PE=1 SV=4	HSP90AB1	1	0.00072324	111.17	AK(1)FENLCK	3	-0.027707	2	1.508	1.469	1.398	0.714	0.677	0.704	0.479	1.56421e-05
Cellular Component	GO:0005903	5	brush border	0.0367033	P08238	568	0.153	Q1	K	Heat shock protein HSP 90-beta OS=Homo sapiens OX=9606 GN=HSP90AB1 PE=1 SV=4	HSP90AB1	1	0.0129056	82.417	LMK(1)EILDK	2	-0.52759	1	2.117	2.005	1.986	0.335	0.306	0.291	0.153	1.0451e-06
Cellular Component	GO:0005903	5	brush border	0.0367033	P35579	180	0.355	Q1	K	Myosin-9 OS=Homo sapiens OX=9606 GN=MYH9 PE=1 SV=4	MYH9	1	5.30441e-22	143.04	EDQSILCTGESGAGK(1)TENTK	3	-0.56027	1	1.567	1.76	1.57	0.594	0.577	0.566	0.355	1.72257e-05
Cellular Component	GO:0005903	5	brush border	0.0367033	P35579	565	0.403	Q1	K	Myosin-9 OS=Homo sapiens OX=9606 GN=MYH9 PE=1 SV=4	MYH9	1	0.00243053	54.898	DK(1)ADFCIIHYAGK	3	-0.65742	1	1.575	1.478	1.63	0.589	0.674	0.622	0.403	4.3735e-05
Cellular Component	GO:0005903	5	brush border	0.0367033	P18206	316	0.374	Q1	K	Vinculin OS=Homo sapiens OX=9606 GN=VCL PE=1 SV=4	VCL	1	0.0100094	72.34	VGELCAGK(1)ER	2	-1.6995	1	1.722	1.618	1.478	0.627	0.582	0.593	0.374	3.9318e-05
Cellular Component	GO:0005903	5	brush border	0.0367033	Q14573	258	0.471	Q1	K	Inositol 1,4,5-trisphosphate receptor type 3 OS=Homo sapiens OX=9606 GN=ITPR3 PE=1 SV=2	ITPR3	1	0.000333363	105.13	FLTCDEYK(1)GK	2	-1.2035	2	1.529	1.425	1.454	0.707	0.674	0.693	0.471	3.6728e-06
Cellular Component	GO:0043292	8	contractile fiber	0.145287	P21333	578	0.272	Q1	K	Filamin-A OS=Homo sapiens OX=9606 GN=FLNA PE=1 SV=4	FLNA	1	0.000120036	101.56	VGTECGNQK(1)VR	2	-0.21816	1	1.73	1.815	1.784	0.486	0.476	0.485	0.272	6.0056e-08
Cellular Component	GO:0043292	8	contractile fiber	0.145287	P21333	2000	0.359	Q1	K	Filamin-A OS=Homo sapiens OX=9606 GN=FLNA PE=1 SV=4	FLNA	1	0.0408648	66.692	EEPCLLK(1)R	2	-0.50213	1	1.675	1.62	1.586	0.582	0.588	0.583	0.359	1.8799e-07
Cellular Component	GO:0043292	8	contractile fiber	0.145287	P21333	1450	0.495	Q1	K	Filamin-A OS=Homo sapiens OX=9606 GN=FLNA PE=1 SV=4	FLNA	1	0.00011233	90.793	VPVHDVTDASK(1)VK	3	0.48724	1	1.479	1.441	1.393	0.691	0.679	0.764	0.495	6.2437e-05
Cellular Component	GO:0043292	8	contractile fiber	0.145287	P04075	140	0.462	Q1	K	Fructose-bisphosphate aldolase A OS=Homo sapiens OX=9606 GN=ALDOA PE=1 SV=2	ALDOA	1	0.0246193	73.499	K(1)DGADFAK	3	0.18494	2	1.579	1.444	1.418	0.69	0.684	0.679	0.462	0.00189588
Cellular Component	GO:0043292	8	contractile fiber	0.145287	Q15149	4576	0.476	Q1	K	Plectin OS=Homo sapiens OX=9606 GN=PLEC PE=1 SV=3	PLEC	1	0.00380529	103.88	YLTCPK(1)TK	3	-0.20071	2	1.483	1.446	1.456	0.71	0.693	0.685	0.476	2.7992e-07
Cellular Component	GO:0043292	8	contractile fiber	0.145287	P06733	335	0.433	Q1	K	Alpha-enolase OS=Homo sapiens OX=9606 GN=ENO1 PE=1 SV=2	ENO1	1	9.75047e-11	130.72	AVNEK(1)SCNCLLLK	2	0.29651	6	1.575	1.526	1.454	0.656	0.66	0.657	0.433	0.00077832
Cellular Component	GO:0043292	8	contractile fiber	0.145287	P35659	349	0.446	Q1	K	Protein DEK OS=Homo sapiens OX=9606 GN=DEK PE=1 SV=1	DEK	1	1.13705e-22	159.18	K(1)VYENYPTYDLTER	2	3.2274	3	1.557	1.532	1.415	0.677	0.719	0.615	0.446	0.000119317
Cellular Component	GO:0043292	8	contractile fiber	0.145287	P47756	57	0.424	Q1	K	F-actin-capping protein subunit beta OS=Homo sapiens OX=9606 GN=CAPZB PE=1 SV=4	CAPZB	1	9.4043e-13	133.47	VVGK(1)DYLLCDYNR	3	-1.9206	2	1.509	1.551	1.529	0.644	0.679	0.623	0.424	2.622e-06
Cellular Component	GO:0043292	8	contractile fiber	0.145287	P18206	316	0.374	Q1	K	Vinculin OS=Homo sapiens OX=9606 GN=VCL PE=1 SV=4	VCL	1	0.0100094	72.34	VGELCAGK(1)ER	2	-1.6995	1	1.722	1.618	1.478	0.627	0.582	0.593	0.374	3.9318e-05
Cellular Component	GO:0005916	6	fascia adherens	0.0558099	P15924	2778	0.393	Q1	K	Desmoplakin OS=Homo sapiens OX=9606 GN=DSP PE=1 SV=3	DSP	1	0.00540315	95.775	ILTCPK(1)TK	3	0.28722	2	1.629	1.493	1.603	0.599	0.624	0.634	0.393	3.948e-06
Cellular Component	GO:0005916	6	fascia adherens	0.0558099	P15924	1144	0.478	Q1	K	Desmoplakin OS=Homo sapiens OX=9606 GN=DSP PE=1 SV=3	DSP	1	0.00870934	73.881	NDYDQLQK(1)AR	2	0.6607	1	1.452	1.523	1.398	0.634	0.744	0.711	0.478	0.000159996
Cellular Component	GO:0005916	6	fascia adherens	0.0558099	P15924	1073	0.268	Q1	K	Desmoplakin OS=Homo sapiens OX=9606 GN=DSP PE=1 SV=3	DSP	1	0.00126733	75.102	YQAECSQFK(1)AK	2	-0.57564	2	1.782	1.777	1.795	0.487	0.466	0.48	0.268	3.1201e-08
Cellular Component	GO:0005916	6	fascia adherens	0.0558099	P15924	478	0.411	Q1	K	Desmoplakin OS=Homo sapiens OX=9606 GN=DSP PE=1 SV=3	DSP	1	0.000142635	91.961	IVHK(1)GDECILK	3	0.58642	1	1.575	1.541	1.528	0.623	0.661	0.627	0.411	9.0198e-07
Cellular Component	GO:0005916	6	fascia adherens	0.0558099	P18206	316	0.374	Q1	K	Vinculin OS=Homo sapiens OX=9606 GN=VCL PE=1 SV=4	VCL	1	0.0100094	72.34	VGELCAGK(1)ER	2	-1.6995	1	1.722	1.618	1.478	0.627	0.582	0.593	0.374	3.9318e-05
Cellular Component	GO:0005930	10	axoneme	0.208434	Q8TD57	2921	0.476	Q1	K	Dynein heavy chain 3, axonemal OS=Homo sapiens OX=9606 GN=DNAH3 PE=2 SV=1	DNAH3	1	0.0106296	49.189	LAAQMQK(1)LNQK	2	-1.4123	1	1.444	1.498	1.439	0.637	0.719	0.728	0.476	7.733e-05
Cellular Component	GO:0005930	10	axoneme	0.208434	Q16181	208	0.405	Q1	K	Septin-7 OS=Homo sapiens OX=9606 GN=SEPTIN7 PE=1 SV=2	SEPTIN7	1	6.18208e-46	200.19	ADTLTPEECQQFK(1)K	2	0.48685	5	1.584	1.532	1.557	0.624	0.625	0.642	0.405	1.4162e-07
Cellular Component	GO:0097546	7	ciliary base	0.0558099	P10644	367	0.327	Q1	K	cAMP-dependent protein kinase type I-alpha regulatory subunit OS=Homo sapiens OX=9606 GN=PRKAR1A PE=1 SV=1	PRKAR1A	1	6.36671e-05	106.67	VLGPCSDILK(1)R	2	-0.67679	1	1.637	1.64	1.76	0.573	0.538	0.536	0.327	2.0587e-06
Cellular Component	GO:0097546	7	ciliary base	0.0558099	P13861	379	0.477	Q1	K	cAMP-dependent protein kinase type II-alpha regulatory subunit OS=Homo sapiens OX=9606 GN=PRKAR2A PE=1 SV=2	PRKAR2A	1	0.00222902	71.03	LLGPCMDIMK(1)R	3	-0.51879	2	1.403	1.491	1.483	0.719	0.659	0.711	0.477	2.2538e-05
Cellular Component	GO:0016529	9	sarcoplasmic reticulum	0.322564	Q12797	646	0.392	Q1	K	Aspartyl/asparaginyl beta-hydroxylase OS=Homo sapiens OX=9606 GN=ASPH PE=1 SV=3	ASPH	1	0.000150126	98.942	GAPK(1)TCTLLEK	3	0.49951	2	1.584	1.579	1.567	0.626	0.608	0.62	0.392	2.7434e-08
Cellular Component	GO:0016529	9	sarcoplasmic reticulum	0.322564	Q13557	292	0.489	Q1	K	Calcium/calmodulin-dependent protein kinase type II subunit delta OS=Homo sapiens OX=9606 GN=CAMK2D PE=1 SV=3	CAMK2D	1	0.0244498	51.436	QETVDCLK(1)K	3	0.21401	1	1.637	1.358	1.344	0.655	0.756	0.712	0.489	0.00073807
Cellular Component	GO:0099086	13	synaptonemal structure	0.152938	P63279	49	0.356	Q1	K	SUMO-conjugating enzyme UBC9 OS=Homo sapiens OX=9606 GN=UBE2I PE=1 SV=1	UBE2I	1	0.00141737	86.699	K(1)GTPWEGGLFK	3	0.37048	2	1.601	1.604	1.683	0.538	0.568	0.634	0.356	3.7389e-05
Cellular Component	GO:0099086	13	synaptonemal structure	0.152938	Q9UQE7	977	0.44	Q1	K	Structural maintenance of chromosomes protein 3 OS=Homo sapiens OX=9606 GN=SMC3 PE=1 SV=2	SMC3	0.99997	0.0237068	46.88	KLEQCNTELK(1)K	3	1.6771	1	1.475	1.481	1.565	0.661	0.655	0.674	0.44	1.2541e-06
Cellular Component	GO:0005952	6	cAMP-dependent protein kinase complex	0.0558099	P10644	367	0.327	Q1	K	cAMP-dependent protein kinase type I-alpha regulatory subunit OS=Homo sapiens OX=9606 GN=PRKAR1A PE=1 SV=1	PRKAR1A	1	6.36671e-05	106.67	VLGPCSDILK(1)R	2	-0.67679	1	1.637	1.64	1.76	0.573	0.538	0.536	0.327	2.0587e-06
Cellular Component	GO:0005952	6	cAMP-dependent protein kinase complex	0.0558099	P13861	379	0.477	Q1	K	cAMP-dependent protein kinase type II-alpha regulatory subunit OS=Homo sapiens OX=9606 GN=PRKAR2A PE=1 SV=2	PRKAR2A	1	0.00222902	71.03	LLGPCMDIMK(1)R	3	-0.51879	2	1.403	1.491	1.483	0.719	0.659	0.711	0.477	2.2538e-05
Cellular Component	GO:0032587	9	ruffle membrane	0.0187968	Q9UNF0	167	0.456	Q1	K	Protein kinase C and casein kinase substrate in neurons protein 2 OS=Homo sapiens OX=9606 GN=PACSIN2 PE=1 SV=2	PACSIN2	1	0.00836713	89.827	EEK(1)LAISR	2	2.2291	1	1.553	1.528	1.383	0.68	0.649	0.706	0.456	5.8155e-05
Cellular Component	GO:0032587	9	ruffle membrane	0.0187968	P23528	45	0.342	Q1	K	Cofilin-1 OS=Homo sapiens OX=9606 GN=CFL1 PE=1 SV=3	CFL1	1	0.00127427	101.39	K(1)NIILEEGK	2	0.23308	5	1.734	1.655	1.576	0.555	0.587	0.557	0.342	2.6776e-06
Cellular Component	GO:0032587	9	ruffle membrane	0.0187968	P23528	44	0.401	Q1	K	Cofilin-1 OS=Homo sapiens OX=9606 GN=CFL1 PE=1 SV=3	CFL1	1	4.72599e-11	153.95	AVLFCLSEDK(1)K	2	-0.65835	3	1.595	1.575	1.523	0.642	0.654	0.585	0.401	1.80522e-05
Cellular Component	GO:0032587	9	ruffle membrane	0.0187968	Q9UM54	240	0.316	Q1	K	Unconventional myosin-VI OS=Homo sapiens OX=9606 GN=MYO6 PE=1 SV=4	MYO6	1	0.0165223	70.056	ICVQGK(1)EER	2	-0.27571	1	1.747	1.741	1.607	0.539	0.568	0.505	0.316	1.61137e-05
Cellular Component	GO:0032587	9	ruffle membrane	0.0187968	Q9UM54	325	0.466	Q1	K	Unconventional myosin-VI OS=Homo sapiens OX=9606 GN=MYO6 PE=1 SV=4	MYO6	1	0.0271518	81.296	MCTAMK(1)K	2	-0.14267	1	1.465	1.483	1.477	0.704	0.711	0.646	0.466	0.00160093
Cellular Component	GO:0032587	9	ruffle membrane	0.0187968	P07900	576	0.235	Q1	K	Heat shock protein HSP 90-alpha OS=Homo sapiens OX=9606 GN=HSP90AA1 PE=1 SV=5	HSP90AA1	1	0.00316475	93.096	IMK(1)DILEK	3	0.51489	4	1.881	1.876	1.791	0.418	0.456	0.43	0.235	5.6281e-07
Cellular Component	GO:0032587	9	ruffle membrane	0.0187968	P50570	90	0.247	Q1	K	Dynamin-2 OS=Homo sapiens OX=9606 GN=DNM2 PE=1 SV=2	DNM2	1	0.007979	78.342	K(1)FTDFDEVR	2	-0.55845	1	1.768	1.787	1.917	0.504	0.415	0.435	0.247	2.2772e-05
Cellular Component	GO:0032587	9	ruffle membrane	0.0187968	Q9Y490	2445	0.279	Q1	K	Talin-1 OS=Homo sapiens OX=9606 GN=TLN1 PE=1 SV=3	TLN1	1	2.8004e-05	114.7	VK(1)ADQDSEAMK	2	-0.094946	1	1.709	1.766	1.815	0.526	0.472	0.478	0.279	2.4271e-06
Cellular Component	GO:0034719	8	SMN-Sm protein complex	0.265507	Q8TEQ6	860	0.481	Q1	K	Gem-associated protein 5 OS=Homo sapiens OX=9606 GN=GEMIN5 PE=1 SV=3	GEMIN5	1	1.41616e-06	104.88	SK(1)EELHQDCLVLATAK	3	-0.75026	1	1.465	1.457	1.445	0.692	0.739	0.668	0.481	0.00165687
Cellular Component	GO:0034719	8	SMN-Sm protein complex	0.265507	Q8TEQ6	1390	0.329	Q1	K	Gem-associated protein 5 OS=Homo sapiens OX=9606 GN=GEMIN5 PE=1 SV=3	GEMIN5	1	0.000373398	101.65	QHQK(1)SQLCK	3	-1.7575	1	1.637	1.637	1.75	0.557	0.576	0.521	0.329	3.6375e-06
Cellular Component	GO:0034719	8	SMN-Sm protein complex	0.265507	Q9Y3F4	148	0.441	Q1	K	Serine-threonine kinase receptor-associated protein OS=Homo sapiens OX=9606 GN=STRAP PE=1 SV=1	STRAP	1	0.00146412	96.229	K(1)ALWCSEDK	2	-0.98203	1	1.605	1.444	1.478	0.651	0.646	0.698	0.441	3.7532e-05
Cellular Component	GO:0031256	7	leading edge membrane	0.055358	Q9UNF0	167	0.456	Q1	K	Protein kinase C and casein kinase substrate in neurons protein 2 OS=Homo sapiens OX=9606 GN=PACSIN2 PE=1 SV=2	PACSIN2	1	0.00836713	89.827	EEK(1)LAISR	2	2.2291	1	1.553	1.528	1.383	0.68	0.649	0.706	0.456	5.8155e-05
Cellular Component	GO:0031256	7	leading edge membrane	0.055358	P23528	45	0.342	Q1	K	Cofilin-1 OS=Homo sapiens OX=9606 GN=CFL1 PE=1 SV=3	CFL1	1	0.00127427	101.39	K(1)NIILEEGK	2	0.23308	5	1.734	1.655	1.576	0.555	0.587	0.557	0.342	2.6776e-06
Cellular Component	GO:0031256	7	leading edge membrane	0.055358	P23528	44	0.401	Q1	K	Cofilin-1 OS=Homo sapiens OX=9606 GN=CFL1 PE=1 SV=3	CFL1	1	4.72599e-11	153.95	AVLFCLSEDK(1)K	2	-0.65835	3	1.595	1.575	1.523	0.642	0.654	0.585	0.401	1.80522e-05
Cellular Component	GO:0031256	7	leading edge membrane	0.055358	Q9UM54	240	0.316	Q1	K	Unconventional myosin-VI OS=Homo sapiens OX=9606 GN=MYO6 PE=1 SV=4	MYO6	1	0.0165223	70.056	ICVQGK(1)EER	2	-0.27571	1	1.747	1.741	1.607	0.539	0.568	0.505	0.316	1.61137e-05
Cellular Component	GO:0031256	7	leading edge membrane	0.055358	Q9UM54	325	0.466	Q1	K	Unconventional myosin-VI OS=Homo sapiens OX=9606 GN=MYO6 PE=1 SV=4	MYO6	1	0.0271518	81.296	MCTAMK(1)K	2	-0.14267	1	1.465	1.483	1.477	0.704	0.711	0.646	0.466	0.00160093
Cellular Component	GO:0031256	7	leading edge membrane	0.055358	P07900	576	0.235	Q1	K	Heat shock protein HSP 90-alpha OS=Homo sapiens OX=9606 GN=HSP90AA1 PE=1 SV=5	HSP90AA1	1	0.00316475	93.096	IMK(1)DILEK	3	0.51489	4	1.881	1.876	1.791	0.418	0.456	0.43	0.235	5.6281e-07
Cellular Component	GO:0031256	7	leading edge membrane	0.055358	P50570	90	0.247	Q1	K	Dynamin-2 OS=Homo sapiens OX=9606 GN=DNM2 PE=1 SV=2	DNM2	1	0.007979	78.342	K(1)FTDFDEVR	2	-0.55845	1	1.768	1.787	1.917	0.504	0.415	0.435	0.247	2.2772e-05
Cellular Component	GO:0031256	7	leading edge membrane	0.055358	Q9Y490	2445	0.279	Q1	K	Talin-1 OS=Homo sapiens OX=9606 GN=TLN1 PE=1 SV=3	TLN1	1	2.8004e-05	114.7	VK(1)ADQDSEAMK	2	-0.094946	1	1.709	1.766	1.815	0.526	0.472	0.478	0.279	2.4271e-06
Cellular Component	GO:0005929	5	cilium	0.122281	P09622	66	0.426	Q1	K	Dihydrolipoyl dehydrogenase, mitochondrial OS=Homo sapiens OX=9606 GN=DLD PE=1 SV=2	DLD	1	6.84578e-17	148.57	AAQLGFK(1)TVCIEK	2	0.7406	2	1.537	1.514	1.534	0.697	0.632	0.626	0.426	0.00164226
Cellular Component	GO:0005929	5	cilium	0.122281	P61964	159	0.483	Q1	K	WD repeat-containing protein 5 OS=Homo sapiens OX=9606 GN=WDR5 PE=1 SV=1	WDR5	1	0.0091824	88.495	IWDVK(1)TGK	3	0.80805	2	1.444	1.439	1.473	0.691	0.714	0.7	0.483	2.2067e-07
Cellular Component	GO:0005929	5	cilium	0.122281	Q8TD57	2921	0.476	Q1	K	Dynein heavy chain 3, axonemal OS=Homo sapiens OX=9606 GN=DNAH3 PE=2 SV=1	DNAH3	1	0.0106296	49.189	LAAQMQK(1)LNQK	2	-1.4123	1	1.444	1.498	1.439	0.637	0.719	0.728	0.476	7.733e-05
Cellular Component	GO:0005929	5	cilium	0.122281	P10644	367	0.327	Q1	K	cAMP-dependent protein kinase type I-alpha regulatory subunit OS=Homo sapiens OX=9606 GN=PRKAR1A PE=1 SV=1	PRKAR1A	1	6.36671e-05	106.67	VLGPCSDILK(1)R	2	-0.67679	1	1.637	1.64	1.76	0.573	0.538	0.536	0.327	2.0587e-06
Cellular Component	GO:0005929	5	cilium	0.122281	P43034	360	0.433	Q1	K	Platelet-activating factor acetylhydrolase IB subunit alpha OS=Homo sapiens OX=9606 GN=PAFAH1B1 PE=1 SV=2	PAFAH1B1	1	0.00320332	72.705	FILSCADDK(1)TLR	2	0.75147	1	1.351	1.606	1.584	0.52	0.74	0.704	0.433	0.0023609
Cellular Component	GO:0005929	5	cilium	0.122281	P14618	162	0.464	Q1	K	Pyruvate kinase PKM OS=Homo sapiens OX=9606 GN=PKM PE=1 SV=4	PKM	1	6.49953e-05	90.725	CDENILWLDYK(1)NICK	3	-0.11353	1	1.459	1.39	1.578	0.656	0.756	0.643	0.464	0.00025908
Cellular Component	GO:0005929	5	cilium	0.122281	P14618	322	0.414	Q1	K	Pyruvate kinase PKM OS=Homo sapiens OX=9606 GN=PKM PE=1 SV=4	PKM	1	4.11221e-09	110.12	AGK(1)PVICATQMLESMIK	3	0.3365	2	1.583	1.521	1.528	0.626	0.629	0.664	0.414	1.32e-06
Cellular Component	GO:0005929	5	cilium	0.122281	P62826	123	0.484	Q1	K	GTP-binding nuclear protein Ran OS=Homo sapiens OX=9606 GN=RAN PE=1 SV=3	RAN	1	1.12796e-19	139.29	VCENIPIVLCGNK(1)VDIK	3	-0.81793	3	1.435	1.493	1.423	0.688	0.703	0.715	0.484	1.2707e-06
Cellular Component	GO:0005929	5	cilium	0.122281	P13861	379	0.477	Q1	K	cAMP-dependent protein kinase type II-alpha regulatory subunit OS=Homo sapiens OX=9606 GN=PRKAR2A PE=1 SV=2	PRKAR2A	1	0.00222902	71.03	LLGPCMDIMK(1)R	3	-0.51879	2	1.403	1.491	1.483	0.719	0.659	0.711	0.477	2.2538e-05
Cellular Component	GO:0005929	5	cilium	0.122281	Q16181	208	0.405	Q1	K	Septin-7 OS=Homo sapiens OX=9606 GN=SEPTIN7 PE=1 SV=2	SEPTIN7	1	6.18208e-46	200.19	ADTLTPEECQQFK(1)K	2	0.48685	5	1.584	1.532	1.557	0.624	0.625	0.642	0.405	1.4162e-07
Cellular Component	GO:0005643	11	nuclear pore	0.226325	P55735	192	0.494	Q1	K	Protein SEC13 homolog OS=Homo sapiens OX=9606 GN=SEC13 PE=1 SV=3	SEC13	1	0.000354026	70.889	FASGGCDNLIK(1)LWK	3	-1.05	1	1.463	1.414	1.438	0.682	0.745	0.705	0.494	1.69329e-05
Cellular Component	GO:0005643	11	nuclear pore	0.226325	Q9GZV4	27	0.482	Q1	K	Eukaryotic translation initiation factor 5A-2 OS=Homo sapiens OX=9606 GN=EIF5A2 PE=1 SV=3	EIF5A2	1	0.033182	76.064	K(1)NGFVVLK	3	-0.01779	2	1.424	1.491	1.449	0.743	0.761	0.599	0.482	0.00068034
Cellular Component	GO:0005643	11	nuclear pore	0.226325	Q9GZV4	34	0.247	Q1	K	Eukaryotic translation initiation factor 5A-2 OS=Homo sapiens OX=9606 GN=EIF5A2 PE=1 SV=3	EIF5A2	1	0.000289488	93.096	KNGFVVLK(1)GR	3	0.33973	4	1.911	1.741	1.829	0.459	0.442	0.452	0.247	5.5759e-07
Cellular Component	GO:0005643	11	nuclear pore	0.226325	Q9NUU7	343	0.497	Q1	K	ATP-dependent RNA helicase DDX19A OS=Homo sapiens OX=9606 GN=DDX19A PE=1 SV=1	DDX19A	1	6.00522e-10	139.58	K(1)TASWLAAELSK	2	-0.2171	1	1.404	1.445	1.452	0.681	0.735	0.723	0.497	1.52266e-05
Cellular Component	GO:0005643	11	nuclear pore	0.226325	P49792	1332	0.254	Q1	K	E3 SUMO-protein ligase RanBP2 OS=Homo sapiens OX=9606 GN=RANBP2 PE=1 SV=2	RANBP2	1	0.00029099	85.554	EPTSHDNK(1)DICK	3	-1.5358	1	1.751	1.825	1.852	0.407	0.466	0.503	0.254	2.3978e-05
Cellular Component	GO:0005643	11	nuclear pore	0.226325	P49792	2581	0.143	Q1	K	E3 SUMO-protein ligase RanBP2 OS=Homo sapiens OX=9606 GN=RANBP2 PE=1 SV=2	RANBP2	0.995422	1.20345e-09	117.65	K(0.005)CELSK(0.995)NSDIEQSSDSK	3	-0.64278	1	2.129	2.071	1.971	0.279	0.301	0.304	0.143	3.2447e-07
Cellular Component	GO:0005643	11	nuclear pore	0.226325	P49792	2138	0.256	Q1	K	E3 SUMO-protein ligase RanBP2 OS=Homo sapiens OX=9606 GN=RANBP2 PE=1 SV=2	RANBP2	1	0.00316207	107.21	QK(1)FEECQR	2	0.11464	1	1.752	1.82	1.844	0.454	0.437	0.496	0.256	2.3285e-06
Cellular Component	GO:0005643	11	nuclear pore	0.226325	P49792	3034	0.452	Q1	K	E3 SUMO-protein ligase RanBP2 OS=Homo sapiens OX=9606 GN=RANBP2 PE=1 SV=2	RANBP2	1	0.00441888	101.65	EVADCFK(1)K	2	-0.79272	1	1.454	1.469	1.548	0.634	0.709	0.679	0.452	3.5313e-05
Cellular Component	GO:0005643	11	nuclear pore	0.226325	P62826	123	0.484	Q1	K	GTP-binding nuclear protein Ran OS=Homo sapiens OX=9606 GN=RAN PE=1 SV=3	RAN	1	1.12796e-19	139.29	VCENIPIVLCGNK(1)VDIK	3	-0.81793	3	1.435	1.493	1.423	0.688	0.703	0.715	0.484	1.2707e-06
Cellular Component	GO:0035097	13	histone methyltransferase complex	0.283617	Q8NEZ4	758	0.436	Q1	K	Histone-lysine N-methyltransferase 2C OS=Homo sapiens OX=9606 GN=KMT2C PE=1 SV=3	KMT2C	1	1.59482e-15	166.6	DVSYQGGK(1)SIK	2	-0.421	2	1.508	1.513	1.523	0.677	0.667	0.635	0.436	0.00055665
Cellular Component	GO:0035097	13	histone methyltransferase complex	0.283617	Q9UMN6	926	0.278	Q1	K	Histone-lysine N-methyltransferase 2B OS=Homo sapiens OX=9606 GN=KMT2B PE=1 SV=1	KMT2B	1	1.13152e-13	91.079	GK(1)VEAAGPGGESEPTGSGGTLAHTPR	3	-0.28959	1	1.528	1.636	2.129	0.557	0.644	0.271	0.278	0.0095622
Cellular Component	GO:0035097	13	histone methyltransferase complex	0.283617	P61964	159	0.483	Q1	K	WD repeat-containing protein 5 OS=Homo sapiens OX=9606 GN=WDR5 PE=1 SV=1	WDR5	1	0.0091824	88.495	IWDVK(1)TGK	3	0.80805	2	1.444	1.439	1.473	0.691	0.714	0.7	0.483	2.2067e-07
Cellular Component	GO:0045254	8	pyruvate dehydrogenase complex	0.023434	P09622	66	0.426	Q1	K	Dihydrolipoyl dehydrogenase, mitochondrial OS=Homo sapiens OX=9606 GN=DLD PE=1 SV=2	DLD	1	6.84578e-17	148.57	AAQLGFK(1)TVCIEK	2	0.7406	2	1.537	1.514	1.534	0.697	0.632	0.626	0.426	0.00164226
Cellular Component	GO:0045254	8	pyruvate dehydrogenase complex	0.023434	P08559	321	0.477	Q1	K	Pyruvate dehydrogenase E1 component subunit alpha, somatic form, mitochondrial OS=Homo sapiens OX=9606 GN=PDHA1 PE=1 SV=3	PDHA1	1	0.000127501	116.74	SDPIMLLK(1)DR	3	-0.61511	3	1.475	1.483	1.42	0.691	0.66	0.738	0.477	3.5027e-05
Cellular Component	GO:0045254	8	pyruvate dehydrogenase complex	0.023434	P08559	313	0.443	Q1	K	Pyruvate dehydrogenase E1 component subunit alpha, somatic form, mitochondrial OS=Homo sapiens OX=9606 GN=PDHA1 PE=1 SV=3	PDHA1	1	0.000353207	107.09	SK(1)SDPIMLLK	2	-0.43555	2	1.553	1.469	1.495	0.707	0.659	0.636	0.443	2.0296e-05
Cellular Component	GO:0045254	8	pyruvate dehydrogenase complex	0.023434	P11177	354	0.474	Q1	K	Pyruvate dehydrogenase E1 component subunit beta, mitochondrial OS=Homo sapiens OX=9606 GN=PDHB PE=1 SV=3	PDHB	1	0.00265664	97.431	DIIFAIK(1)K	2	-0.98846	2	1.48	1.43	1.478	0.7	0.665	0.717	0.474	3.69e-06
Cellular Component	GO:0043034	10	costamere	0.208434	Q15149	4576	0.476	Q1	K	Plectin OS=Homo sapiens OX=9606 GN=PLEC PE=1 SV=3	PLEC	1	0.00380529	103.88	YLTCPK(1)TK	3	-0.20071	2	1.483	1.446	1.456	0.71	0.693	0.685	0.476	2.7992e-07
Cellular Component	GO:0043034	10	costamere	0.208434	P18206	316	0.374	Q1	K	Vinculin OS=Homo sapiens OX=9606 GN=VCL PE=1 SV=4	VCL	1	0.0100094	72.34	VGELCAGK(1)ER	2	-1.6995	1	1.722	1.618	1.478	0.627	0.582	0.593	0.374	3.9318e-05
Cellular Component	GO:0044291	4	cell-cell contact zone	0.242038	P15924	2778	0.393	Q1	K	Desmoplakin OS=Homo sapiens OX=9606 GN=DSP PE=1 SV=3	DSP	1	0.00540315	95.775	ILTCPK(1)TK	3	0.28722	2	1.629	1.493	1.603	0.599	0.624	0.634	0.393	3.948e-06
Cellular Component	GO:0044291	4	cell-cell contact zone	0.242038	P15924	1144	0.478	Q1	K	Desmoplakin OS=Homo sapiens OX=9606 GN=DSP PE=1 SV=3	DSP	1	0.00870934	73.881	NDYDQLQK(1)AR	2	0.6607	1	1.452	1.523	1.398	0.634	0.744	0.711	0.478	0.000159996
Cellular Component	GO:0044291	4	cell-cell contact zone	0.242038	P15924	1073	0.268	Q1	K	Desmoplakin OS=Homo sapiens OX=9606 GN=DSP PE=1 SV=3	DSP	1	0.00126733	75.102	YQAECSQFK(1)AK	2	-0.57564	2	1.782	1.777	1.795	0.487	0.466	0.48	0.268	3.1201e-08
Cellular Component	GO:0044291	4	cell-cell contact zone	0.242038	P15924	478	0.411	Q1	K	Desmoplakin OS=Homo sapiens OX=9606 GN=DSP PE=1 SV=3	DSP	1	0.000142635	91.961	IVHK(1)GDECILK	3	0.58642	1	1.575	1.541	1.528	0.623	0.661	0.627	0.411	9.0198e-07
Cellular Component	GO:0044291	4	cell-cell contact zone	0.242038	P18206	316	0.374	Q1	K	Vinculin OS=Homo sapiens OX=9606 GN=VCL PE=1 SV=4	VCL	1	0.0100094	72.34	VGELCAGK(1)ER	2	-1.6995	1	1.722	1.618	1.478	0.627	0.582	0.593	0.374	3.9318e-05
Cellular Component	GO:0044291	4	cell-cell contact zone	0.242038	P35221	120	0.488	Q1	K	Catenin alpha-1 OS=Homo sapiens OX=9606 GN=CTNNA1 PE=1 SV=1	CTNNA1	1	5.50199e-08	107.82	AAAGEFADDPCSSVK(1)R	2	-0.12176	1	1.365	1.42	1.547	0.7	0.659	0.755	0.488	0.000182432
Cellular Component	GO:0005838	8	proteasome regulatory particle	0.252358	O00231	295	0.478	Q1	K	26S proteasome non-ATPase regulatory subunit 11 OS=Homo sapiens OX=9606 GN=PSMD11 PE=1 SV=3	PSMD11	1	0.001407	96.342	CVAQASK(1)NR	2	-0.83892	1	1.327	1.442	1.601	0.681	0.715	0.692	0.478	0.000198007
Cellular Component	GO:0005838	8	proteasome regulatory particle	0.252358	Q99460	803	0.27	Q1	K	26S proteasome non-ATPase regulatory subunit 1 OS=Homo sapiens OX=9606 GN=PSMD1 PE=1 SV=2	PSMD1	1	0.00310268	107.79	VQYK(1)SNCK	2	0.97742	1	1.725	1.781	1.835	0.501	0.47	0.469	0.27	6.2804e-07
Cellular Component	GO:0005838	8	proteasome regulatory particle	0.252358	Q15008	349	0.366	Q1	K	26S proteasome non-ATPase regulatory subunit 6 OS=Homo sapiens OX=9606 GN=PSMD6 PE=1 SV=1	PSMD6	1	2.45272e-05	93.226	IDK(1)VNEIVETNRPDSK	4	0.090022	2	1.596	1.624	1.626	0.576	0.6	0.598	0.366	1.2631e-07
Cellular Component	GO:0005838	8	proteasome regulatory particle	0.252358	P17980	125	0.237	Q1	K	26S proteasome regulatory subunit 6A OS=Homo sapiens OX=9606 GN=PSMC3 PE=1 SV=3	PSMC3	1	0.00143165	104.05	CAVIK(1)TSTR	2	-2.0264	1	1.899	1.947	1.692	0.467	0.463	0.384	0.237	4.4152e-05
Cellular Component	GO:0005838	8	proteasome regulatory particle	0.252358	P17980	245	0.411	Q1	K	26S proteasome regulatory subunit 6A OS=Homo sapiens OX=9606 GN=PSMC3 PE=1 SV=3	PSMC3	1	1.931e-13	150.11	ACAAQTK(1)ATFLK	2	0.060852	2	1.561	1.511	1.576	0.622	0.649	0.638	0.411	4.732e-07
Cellular Component	GO:0005776	9	autophagosome	0.322564	Q8TBX8	101	0.404	Q1	K	Phosphatidylinositol 5-phosphate 4-kinase type-2 gamma OS=Homo sapiens OX=9606 GN=PIP4K2C PE=1 SV=3	PIP4K2C	1	0.00146113	87.184	FK(1)EYCPQVFR	2	-1.1875	1	1.494	1.627	1.556	0.659	0.638	0.592	0.404	2.1405e-05
Cellular Component	GO:0005776	9	autophagosome	0.322564	Q9BQS8	1019	0.497	Q1	K	FYVE and coiled-coil domain-containing protein 1 OS=Homo sapiens OX=9606 GN=FYCO1 PE=1 SV=3	FYCO1	1	0.0318989	61.344	LK(1)NAGEECK	2	0.19512	1	1.402	1.445	1.456	0.691	0.699	0.748	0.497	1.6862e-05
Cellular Component	GO:0030126	13	COPI vesicle coat	0.208434	P53621	750	0.374	Q1	K	Coatomer subunit alpha OS=Homo sapiens OX=9606 GN=COPA PE=1 SV=2	COPA	1	0.00254514	113.26	ILK(1)NCGQK	2	-0.065422	1	1.6	1.63	1.578	0.601	0.573	0.625	0.374	1.6491e-06
Cellular Component	GO:0030126	13	COPI vesicle coat	0.208434	P48444	476	0.346	Q1	K	Coatomer subunit delta OS=Homo sapiens OX=9606 GN=ARCN1 PE=1 SV=1	ARCN1	1	1.67965e-14	164.04	K(1)NYCNIQVTK	2	-1.1886	4	1.646	1.641	1.654	0.588	0.583	0.541	0.346	0.00062328
Cellular Component	GO:0031970	9	organelle envelope lumen	0.14781	P51970	38	0.266	Q1	K	NADH dehydrogenase [ubiquinone] 1 alpha subcomplex subunit 8 OS=Homo sapiens OX=9606 GN=NDUFA8 PE=1 SV=3	NDUFA8	1	0.00170306	54.09	AAAHHYGAQCDK(1)PNK	3	-0.081265	3	1.827	1.722	1.816	0.446	0.503	0.476	0.266	2.3488e-06
Cellular Component	GO:0031970	9	organelle envelope lumen	0.14781	P50440	55	0.311	Q1	K	Glycine amidinotransferase, mitochondrial OS=Homo sapiens OX=9606 GN=GATM PE=1 SV=1	GATM	1	3.3852e-05	94.203	NSCAADDK(1)ATEPLPK	2	0.013338	2	1.63	1.844	1.642	0.525	0.511	0.553	0.311	1.72561e-05
Cellular Component	GO:0031970	9	organelle envelope lumen	0.14781	Q99497	62	0.381	Q1	K	Protein/nucleic acid deglycase DJ-1 OS=Homo sapiens OX=9606 GN=PARK7 PE=1 SV=2	PARK7	1	2.72946e-27	162.29	DVVICPDASLEDAK(1)K	2	-0.16613	1	1.505	1.635	1.635	0.609	0.57	0.638	0.381	2.1387e-05
Cellular Component	GO:0031970	9	organelle envelope lumen	0.14781	P11717	1285	0.431	Q1	K	Cation-independent mannose-6-phosphate receptor OS=Homo sapiens OX=9606 GN=IGF2R PE=1 SV=3	IGF2R	1	0.0187544	68.657	VVSSCQEK(1)R	2	-1.3987	1	1.571	1.542	1.451	0.618	0.683	0.664	0.431	2.2521e-05
Cellular Component	GO:0031970	9	organelle envelope lumen	0.14781	Q14061	30	0.314	Q1	K	Cytochrome c oxidase copper chaperone OS=Homo sapiens OX=9606 GN=COX17 PE=1 SV=2	COX17	1	0.000242026	75.911	KPLKPCCACPETK(1)K	4	0.22637	1	1.732	1.742	1.627	0.497	0.553	0.553	0.314	1.50298e-05
Cellular Component	GO:0042382	14	paraspeckles	0.208434	P23246	291	0.362	Q1	K	Splicing factor, proline- and glutamine-rich OS=Homo sapiens OX=9606 GN=SFPQ PE=1 SV=2	SFPQ	1	8.40845e-05	98.156	RPGEK(1)TYTQR	3	-0.73735	1	1.495	1.709	1.664	0.668	0.613	0.48	0.362	0.0006635
Cellular Component	GO:0042382	14	paraspeckles	0.208434	P52272	651	0.461	Q1	K	Heterogeneous nuclear ribonucleoprotein M OS=Homo sapiens OX=9606 GN=HNRNPM PE=1 SV=3	HNRNPM	1	0.00449966	101.25	K(1)ACQIFVR	2	0.83942	1	1.564	1.465	1.42	0.742	0.669	0.64	0.461	0.000119993
Cellular Component	GO:0042382	14	paraspeckles	0.208434	P52272	698	0.258	Q1	K	Heterogeneous nuclear ribonucleoprotein M OS=Homo sapiens OX=9606 GN=HNRNPM PE=1 SV=3	HNRNPM	1	4.83172e-06	105.28	GCGVVK(1)FESPEVAER	3	-0.2701	5	1.819	1.824	1.767	0.461	0.488	0.447	0.258	5.1747e-07
Cellular Component	GO:0031514	6	motile cilium	0.12921	P09622	66	0.426	Q1	K	Dihydrolipoyl dehydrogenase, mitochondrial OS=Homo sapiens OX=9606 GN=DLD PE=1 SV=2	DLD	1	6.84578e-17	148.57	AAQLGFK(1)TVCIEK	2	0.7406	2	1.537	1.514	1.534	0.697	0.632	0.626	0.426	0.00164226
Cellular Component	GO:0031514	6	motile cilium	0.12921	P43034	360	0.433	Q1	K	Platelet-activating factor acetylhydrolase IB subunit alpha OS=Homo sapiens OX=9606 GN=PAFAH1B1 PE=1 SV=2	PAFAH1B1	1	0.00320332	72.705	FILSCADDK(1)TLR	2	0.75147	1	1.351	1.606	1.584	0.52	0.74	0.704	0.433	0.0023609
Cellular Component	GO:0031514	6	motile cilium	0.12921	P62826	123	0.484	Q1	K	GTP-binding nuclear protein Ran OS=Homo sapiens OX=9606 GN=RAN PE=1 SV=3	RAN	1	1.12796e-19	139.29	VCENIPIVLCGNK(1)VDIK	3	-0.81793	3	1.435	1.493	1.423	0.688	0.703	0.715	0.484	1.2707e-06
Cellular Component	GO:0031514	6	motile cilium	0.12921	Q16181	208	0.405	Q1	K	Septin-7 OS=Homo sapiens OX=9606 GN=SEPTIN7 PE=1 SV=2	SEPTIN7	1	6.18208e-46	200.19	ADTLTPEECQQFK(1)K	2	0.48685	5	1.584	1.532	1.557	0.624	0.625	0.642	0.405	1.4162e-07
Cellular Component	GO:0071782	11	endoplasmic reticulum tubular network	0.265507	Q12797	646	0.392	Q1	K	Aspartyl/asparaginyl beta-hydroxylase OS=Homo sapiens OX=9606 GN=ASPH PE=1 SV=3	ASPH	1	0.000150126	98.942	GAPK(1)TCTLLEK	3	0.49951	2	1.584	1.579	1.567	0.626	0.608	0.62	0.392	2.7434e-08
Cellular Component	GO:0071782	11	endoplasmic reticulum tubular network	0.265507	Q9BZF1	723	0.308	Q1	K	Oxysterol-binding protein-related protein 8 OS=Homo sapiens OX=9606 GN=OSBPL8 PE=1 SV=3	OSBPL8	1	0.00193928	91.961	TK(1)NEEWSCK	2	-0.38205	1	1.813	1.677	1.649	0.554	0.493	0.537	0.308	1.66199e-05
Cellular Component	GO:0016528	7	sarcoplasm	0.163022	Q15149	4576	0.476	Q1	K	Plectin OS=Homo sapiens OX=9606 GN=PLEC PE=1 SV=3	PLEC	1	0.00380529	103.88	YLTCPK(1)TK	3	-0.20071	2	1.483	1.446	1.456	0.71	0.693	0.685	0.476	2.7992e-07
Cellular Component	GO:0016528	7	sarcoplasm	0.163022	Q12797	646	0.392	Q1	K	Aspartyl/asparaginyl beta-hydroxylase OS=Homo sapiens OX=9606 GN=ASPH PE=1 SV=3	ASPH	1	0.000150126	98.942	GAPK(1)TCTLLEK	3	0.49951	2	1.584	1.579	1.567	0.626	0.608	0.62	0.392	2.7434e-08
Cellular Component	GO:0016528	7	sarcoplasm	0.163022	Q13557	292	0.489	Q1	K	Calcium/calmodulin-dependent protein kinase type II subunit delta OS=Homo sapiens OX=9606 GN=CAMK2D PE=1 SV=3	CAMK2D	1	0.0244498	51.436	QETVDCLK(1)K	3	0.21401	1	1.637	1.358	1.344	0.655	0.756	0.712	0.489	0.00073807
Cellular Component	GO:1902911	6	protein kinase complex	0.322564	P10644	367	0.327	Q1	K	cAMP-dependent protein kinase type I-alpha regulatory subunit OS=Homo sapiens OX=9606 GN=PRKAR1A PE=1 SV=1	PRKAR1A	1	6.36671e-05	106.67	VLGPCSDILK(1)R	2	-0.67679	1	1.637	1.64	1.76	0.573	0.538	0.536	0.327	2.0587e-06
Cellular Component	GO:1902911	6	protein kinase complex	0.322564	P13861	379	0.477	Q1	K	cAMP-dependent protein kinase type II-alpha regulatory subunit OS=Homo sapiens OX=9606 GN=PRKAR2A PE=1 SV=2	PRKAR2A	1	0.00222902	71.03	LLGPCMDIMK(1)R	3	-0.51879	2	1.403	1.491	1.483	0.719	0.659	0.711	0.477	2.2538e-05
Cellular Component	GO:0000805	10	X chromosome	0.0104837	O75367	304	0.372	Q1	K	Core histone macro-H2A.1 OS=Homo sapiens OX=9606 GN=H2AFY PE=1 SV=4	H2AFY	1	0.000144859	116.24	NCLALADDK(1)K	2	0.39339	2	1.634	1.692	1.494	0.556	0.613	0.622	0.372	4.0974e-05
Cellular Component	GO:0000805	10	X chromosome	0.0104837	P84243	37	0.422	Q1	K	Histone H3.3 OS=Homo sapiens OX=9606 GN=H3-3A PE=1 SV=2	H3-3A	1	0.000237623	93.623	K(1)SAPSTGGVK(1)K	2	-0.62162	5	1.579	1.45	1.573	0.637	0.664	0.641	0.422	4.7532e-06
Cellular Component	GO:0000805	10	X chromosome	0.0104837	A6NHR9	569	0.401	Q1	K	Structural maintenance of chromosomes flexible hinge domain-containing protein 1 OS=Homo sapiens OX=9606 GN=SMCHD1 PE=1 SV=2	SMCHD1	1	0.00714345	72.928	DCHEK(1)YDK	3	3.8917	1	1.61	1.654	1.43	0.645	0.636	0.6	0.401	5.6202e-05
Cellular Component	GO:0030057	4	desmosome	0.101136	P15924	2778	0.393	Q1	K	Desmoplakin OS=Homo sapiens OX=9606 GN=DSP PE=1 SV=3	DSP	1	0.00540315	95.775	ILTCPK(1)TK	3	0.28722	2	1.629	1.493	1.603	0.599	0.624	0.634	0.393	3.948e-06
Cellular Component	GO:0030057	4	desmosome	0.101136	P15924	1144	0.478	Q1	K	Desmoplakin OS=Homo sapiens OX=9606 GN=DSP PE=1 SV=3	DSP	1	0.00870934	73.881	NDYDQLQK(1)AR	2	0.6607	1	1.452	1.523	1.398	0.634	0.744	0.711	0.478	0.000159996
Cellular Component	GO:0030057	4	desmosome	0.101136	P15924	1073	0.268	Q1	K	Desmoplakin OS=Homo sapiens OX=9606 GN=DSP PE=1 SV=3	DSP	1	0.00126733	75.102	YQAECSQFK(1)AK	2	-0.57564	2	1.782	1.777	1.795	0.487	0.466	0.48	0.268	3.1201e-08
Cellular Component	GO:0030057	4	desmosome	0.101136	P15924	478	0.411	Q1	K	Desmoplakin OS=Homo sapiens OX=9606 GN=DSP PE=1 SV=3	DSP	1	0.000142635	91.961	IVHK(1)GDECILK	3	0.58642	1	1.575	1.541	1.528	0.623	0.661	0.627	0.411	9.0198e-07
Cellular Component	GO:0030057	4	desmosome	0.101136	P18206	316	0.374	Q1	K	Vinculin OS=Homo sapiens OX=9606 GN=VCL PE=1 SV=4	VCL	1	0.0100094	72.34	VGELCAGK(1)ER	2	-1.6995	1	1.722	1.618	1.478	0.627	0.582	0.593	0.374	3.9318e-05
Cellular Component	GO:0005902	6	microvillus	0.0669234	Q13576	553	0.379	Q1	K	Ras GTPase-activating-like protein IQGAP2 OS=Homo sapiens OX=9606 GN=IQGAP2 PE=1 SV=4	IQGAP2	1	0.00516444	78.324	K(1)SSDILSVLK	2	-0.62996	1	1.562	1.607	1.618	0.612	0.547	0.655	0.379	5.7146e-05
Cellular Component	GO:0005902	6	microvillus	0.0669234	Q13576	273	0.384	Q1	K	Ras GTPase-activating-like protein IQGAP2 OS=Homo sapiens OX=9606 GN=IQGAP2 PE=1 SV=4	IQGAP2	1	0.00160054	85.163	LK(1)NSCISEEER	2	-0.32659	1	1.651	1.654	1.463	0.624	0.568	0.638	0.384	5.9778e-05
Cellular Component	GO:0005902	6	microvillus	0.0669234	Q13576	1454	0.478	Q1	K	Ras GTPase-activating-like protein IQGAP2 OS=Homo sapiens OX=9606 GN=IQGAP2 PE=1 SV=4	IQGAP2	1	0.0105865	86.882	TCLDNLK(1)R	2	-0.99215	1	1.5	1.459	1.416	0.707	0.68	0.706	0.478	1.9511e-06
Cellular Component	GO:0005902	6	microvillus	0.0669234	P38606	132	0.405	Q1	K	V-type proton ATPase catalytic subunit A OS=Homo sapiens OX=9606 GN=ATP6V1A PE=1 SV=2	ATP6V1A	1	0.000353207	107.09	DIK(1)WDFTPCK	2	-0.13164	2	1.639	1.537	1.502	0.652	0.641	0.6	0.405	1.77762e-05
Cellular Component	GO:0005902	6	microvillus	0.0669234	P21281	109	0.48	Q1	K	V-type proton ATPase subunit B, brain isoform OS=Homo sapiens OX=9606 GN=ATP6V1B2 PE=1 SV=3	ATP6V1B2	1	0.000924525	87.718	K(1)TSCEFTGDILR	3	-0.37516	3	1.482	1.45	1.439	0.716	0.687	0.694	0.48	5.5611e-07
Cellular Component	GO:0005902	6	microvillus	0.0669234	Q9UM54	240	0.316	Q1	K	Unconventional myosin-VI OS=Homo sapiens OX=9606 GN=MYO6 PE=1 SV=4	MYO6	1	0.0165223	70.056	ICVQGK(1)EER	2	-0.27571	1	1.747	1.741	1.607	0.539	0.568	0.505	0.316	1.61137e-05
Cellular Component	GO:0005902	6	microvillus	0.0669234	Q9UM54	325	0.466	Q1	K	Unconventional myosin-VI OS=Homo sapiens OX=9606 GN=MYO6 PE=1 SV=4	MYO6	1	0.0271518	81.296	MCTAMK(1)K	2	-0.14267	1	1.465	1.483	1.477	0.704	0.711	0.646	0.466	0.00160093
Cellular Component	GO:0005902	6	microvillus	0.0669234	Q9Y365	221	0.458	Q1	K	START domain-containing protein 10 OS=Homo sapiens OX=9606 GN=STARD10 PE=1 SV=2	STARD10	1	0.0014322	104.22	ACLK(1)YPEWK	3	-0.41171	2	1.467	1.532	1.456	0.701	0.691	0.647	0.458	1.58852e-05
Cellular Component	GO:0030137	11	COPI-coated vesicle	0.322564	P53621	750	0.374	Q1	K	Coatomer subunit alpha OS=Homo sapiens OX=9606 GN=COPA PE=1 SV=2	COPA	1	0.00254514	113.26	ILK(1)NCGQK	2	-0.065422	1	1.6	1.63	1.578	0.601	0.573	0.625	0.374	1.6491e-06
Cellular Component	GO:0030137	11	COPI-coated vesicle	0.322564	P48444	476	0.346	Q1	K	Coatomer subunit delta OS=Homo sapiens OX=9606 GN=ARCN1 PE=1 SV=1	ARCN1	1	1.67965e-14	164.04	K(1)NYCNIQVTK	2	-1.1886	4	1.646	1.641	1.654	0.588	0.583	0.541	0.346	0.00062328
Cellular Component	GO:0030864	12	cortical actin cytoskeleton	0.103444	P60981	30	0.396	Q1	K	Destrin OS=Homo sapiens OX=9606 GN=DSTN PE=1 SV=3	DSTN	1	0.00172616	93.096	CSTPEEIK(1)K	3	-1.0849	3	1.589	1.587	1.536	0.613	0.602	0.649	0.396	1.6318e-06
Cellular Component	GO:0030864	12	cortical actin cytoskeleton	0.103444	Q14847	50	0.459	Q1	K	LIM and SH3 domain protein 1 OS=Homo sapiens OX=9606 GN=LASP1 PE=1 SV=2	LASP1	1	0.010633	57.785	K(1)PYCNAHYPK	3	-0.53436	2	1.432	1.49	1.529	0.706	0.675	0.66	0.459	4.5956e-06
Cellular Component	GO:0030864	12	cortical actin cytoskeleton	0.103444	P35579	180	0.355	Q1	K	Myosin-9 OS=Homo sapiens OX=9606 GN=MYH9 PE=1 SV=4	MYH9	1	5.30441e-22	143.04	EDQSILCTGESGAGK(1)TENTK	3	-0.56027	1	1.567	1.76	1.57	0.594	0.577	0.566	0.355	1.72257e-05
Cellular Component	GO:0030864	12	cortical actin cytoskeleton	0.103444	P35579	565	0.403	Q1	K	Myosin-9 OS=Homo sapiens OX=9606 GN=MYH9 PE=1 SV=4	MYH9	1	0.00243053	54.898	DK(1)ADFCIIHYAGK	3	-0.65742	1	1.575	1.478	1.63	0.589	0.674	0.622	0.403	4.3735e-05
Cellular Component	GO:0030864	12	cortical actin cytoskeleton	0.103444	P18206	316	0.374	Q1	K	Vinculin OS=Homo sapiens OX=9606 GN=VCL PE=1 SV=4	VCL	1	0.0100094	72.34	VGELCAGK(1)ER	2	-1.6995	1	1.722	1.618	1.478	0.627	0.582	0.593	0.374	3.9318e-05
Cellular Component	GO:0005911	3	cell-cell junction	0.0475221	P21333	578	0.272	Q1	K	Filamin-A OS=Homo sapiens OX=9606 GN=FLNA PE=1 SV=4	FLNA	1	0.000120036	101.56	VGTECGNQK(1)VR	2	-0.21816	1	1.73	1.815	1.784	0.486	0.476	0.485	0.272	6.0056e-08
Cellular Component	GO:0005911	3	cell-cell junction	0.0475221	P21333	2000	0.359	Q1	K	Filamin-A OS=Homo sapiens OX=9606 GN=FLNA PE=1 SV=4	FLNA	1	0.0408648	66.692	EEPCLLK(1)R	2	-0.50213	1	1.675	1.62	1.586	0.582	0.588	0.583	0.359	1.8799e-07
Cellular Component	GO:0005911	3	cell-cell junction	0.0475221	P21333	1450	0.495	Q1	K	Filamin-A OS=Homo sapiens OX=9606 GN=FLNA PE=1 SV=4	FLNA	1	0.00011233	90.793	VPVHDVTDASK(1)VK	3	0.48724	1	1.479	1.441	1.393	0.691	0.679	0.764	0.495	6.2437e-05
Cellular Component	GO:0005911	3	cell-cell junction	0.0475221	P61158	240	0.393	Q1	K	Actin-related protein 3 OS=Homo sapiens OX=9606 GN=ACTR3 PE=1 SV=3	ACTR3	1	1.55569e-05	98.337	YSYVCPDLVK(1)EFNK	3	2.9551	2	1.592	1.567	1.567	0.63	0.614	0.613	0.393	4.4494e-08
Cellular Component	GO:0005911	3	cell-cell junction	0.0475221	P15924	2778	0.393	Q1	K	Desmoplakin OS=Homo sapiens OX=9606 GN=DSP PE=1 SV=3	DSP	1	0.00540315	95.775	ILTCPK(1)TK	3	0.28722	2	1.629	1.493	1.603	0.599	0.624	0.634	0.393	3.948e-06
Cellular Component	GO:0005911	3	cell-cell junction	0.0475221	P15924	1144	0.478	Q1	K	Desmoplakin OS=Homo sapiens OX=9606 GN=DSP PE=1 SV=3	DSP	1	0.00870934	73.881	NDYDQLQK(1)AR	2	0.6607	1	1.452	1.523	1.398	0.634	0.744	0.711	0.478	0.000159996
Cellular Component	GO:0005911	3	cell-cell junction	0.0475221	P15924	1073	0.268	Q1	K	Desmoplakin OS=Homo sapiens OX=9606 GN=DSP PE=1 SV=3	DSP	1	0.00126733	75.102	YQAECSQFK(1)AK	2	-0.57564	2	1.782	1.777	1.795	0.487	0.466	0.48	0.268	3.1201e-08
Cellular Component	GO:0005911	3	cell-cell junction	0.0475221	P15924	478	0.411	Q1	K	Desmoplakin OS=Homo sapiens OX=9606 GN=DSP PE=1 SV=3	DSP	1	0.000142635	91.961	IVHK(1)GDECILK	3	0.58642	1	1.575	1.541	1.528	0.623	0.661	0.627	0.411	9.0198e-07
Cellular Component	GO:0005911	3	cell-cell junction	0.0475221	Q92797	684	0.342	Q1	K	Symplekin OS=Homo sapiens OX=9606 GN=SYMPK PE=1 SV=2	SYMPK	1	0.0226227	76.282	K(1)YCEDESR	2	0.04773	1	1.777	1.569	1.621	0.525	0.593	0.579	0.342	3.7122e-05
Cellular Component	GO:0005911	3	cell-cell junction	0.0475221	P35579	180	0.355	Q1	K	Myosin-9 OS=Homo sapiens OX=9606 GN=MYH9 PE=1 SV=4	MYH9	1	5.30441e-22	143.04	EDQSILCTGESGAGK(1)TENTK	3	-0.56027	1	1.567	1.76	1.57	0.594	0.577	0.566	0.355	1.72257e-05
Cellular Component	GO:0005911	3	cell-cell junction	0.0475221	P35579	565	0.403	Q1	K	Myosin-9 OS=Homo sapiens OX=9606 GN=MYH9 PE=1 SV=4	MYH9	1	0.00243053	54.898	DK(1)ADFCIIHYAGK	3	-0.65742	1	1.575	1.478	1.63	0.589	0.674	0.622	0.403	4.3735e-05
Cellular Component	GO:0005911	3	cell-cell junction	0.0475221	P48059	297	0.481	Q1	K	LIM and senescent cell antigen-like-containing domain protein 1 OS=Homo sapiens OX=9606 GN=LIMS1 PE=1 SV=4	LIMS1	1	0.0200857	46.352	FVEFDMK(1)PVCK	3	-2.7639	1	1.461	1.531	1.372	0.673	0.745	0.681	0.481	8.2371e-05
Cellular Component	GO:0005911	3	cell-cell junction	0.0475221	O60716	448	0.494	Q1	K	Catenin delta-1 OS=Homo sapiens OX=9606 GN=CTNND1 PE=1 SV=1	CTNND1	1	1.1653e-10	125.47	IAIK(1)NCDGVPALVR	3	1.9491	2	1.454	1.467	1.396	0.71	0.723	0.699	0.494	1.3007e-06
Cellular Component	GO:0005911	3	cell-cell junction	0.0475221	O60716	846	0.494	Q1	K	Catenin delta-1 OS=Homo sapiens OX=9606 GN=CTNND1 PE=1 SV=1	CTNND1	1	0.000757674	89.507	K(1)SDFQVNLNNASR	2	4.4664	1	1.431	1.414	1.468	0.7	0.699	0.732	0.494	1.4922e-06
Cellular Component	GO:0005911	3	cell-cell junction	0.0475221	P18206	316	0.374	Q1	K	Vinculin OS=Homo sapiens OX=9606 GN=VCL PE=1 SV=4	VCL	1	0.0100094	72.34	VGELCAGK(1)ER	2	-1.6995	1	1.722	1.618	1.478	0.627	0.582	0.593	0.374	3.9318e-05
Cellular Component	GO:0005911	3	cell-cell junction	0.0475221	Q9Y365	221	0.458	Q1	K	START domain-containing protein 10 OS=Homo sapiens OX=9606 GN=STARD10 PE=1 SV=2	STARD10	1	0.0014322	104.22	ACLK(1)YPEWK	3	-0.41171	2	1.467	1.532	1.456	0.701	0.691	0.647	0.458	1.58852e-05
Cellular Component	GO:0005911	3	cell-cell junction	0.0475221	O00151	294	0.483	Q1	K	PDZ and LIM domain protein 1 OS=Homo sapiens OX=9606 GN=PDLIM1 PE=1 SV=4	PDLIM1	1	9.67413e-05	66.022	HPECYVCTDCGTNLK(1)QK	3	-1.3955	1	1.309	1.579	1.467	0.737	0.699	0.666	0.483	0.00030086
Cellular Component	GO:0005911	3	cell-cell junction	0.0475221	Q9P0L0	52	0.307	Q1	K	Vesicle-associated membrane protein-associated protein A OS=Homo sapiens OX=9606 GN=VAPA PE=1 SV=3	VAPA	1	0.0183623	88.819	VK(1)TTAPR	2	0.92096	1	1.883	1.543	1.719	0.5	0.456	0.622	0.307	0.0003986
Cellular Component	GO:0005911	3	cell-cell junction	0.0475221	Q9UNF0	167	0.456	Q1	K	Protein kinase C and casein kinase substrate in neurons protein 2 OS=Homo sapiens OX=9606 GN=PACSIN2 PE=1 SV=2	PACSIN2	1	0.00836713	89.827	EEK(1)LAISR	2	2.2291	1	1.553	1.528	1.383	0.68	0.649	0.706	0.456	5.8155e-05
Cellular Component	GO:0005911	3	cell-cell junction	0.0475221	Q99497	62	0.381	Q1	K	Protein/nucleic acid deglycase DJ-1 OS=Homo sapiens OX=9606 GN=PARK7 PE=1 SV=2	PARK7	1	2.72946e-27	162.29	DVVICPDASLEDAK(1)K	2	-0.16613	1	1.505	1.635	1.635	0.609	0.57	0.638	0.381	2.1387e-05
Cellular Component	GO:0005911	3	cell-cell junction	0.0475221	Q9Y490	2445	0.279	Q1	K	Talin-1 OS=Homo sapiens OX=9606 GN=TLN1 PE=1 SV=3	TLN1	1	2.8004e-05	114.7	VK(1)ADQDSEAMK	2	-0.094946	1	1.709	1.766	1.815	0.526	0.472	0.478	0.279	2.4271e-06
Cellular Component	GO:0005911	3	cell-cell junction	0.0475221	P35221	120	0.488	Q1	K	Catenin alpha-1 OS=Homo sapiens OX=9606 GN=CTNNA1 PE=1 SV=1	CTNNA1	1	5.50199e-08	107.82	AAAGEFADDPCSSVK(1)R	2	-0.12176	1	1.365	1.42	1.547	0.7	0.659	0.755	0.488	0.000182432
Cellular Component	GO:0031074	6	nucleocytoplasmic shuttling complex	0.101136	Q9HAV4	41	0.321	Q1	K	Exportin-5 OS=Homo sapiens OX=9606 GN=XPO5 PE=1 SV=1	XPO5	1	0.00432488	85.355	FCEEFK(1)EK	3	-0.12728	2	1.76	1.666	1.642	0.532	0.523	0.574	0.321	2.8685e-06
Cellular Component	GO:0031074	6	nucleocytoplasmic shuttling complex	0.101136	P62826	123	0.484	Q1	K	GTP-binding nuclear protein Ran OS=Homo sapiens OX=9606 GN=RAN PE=1 SV=3	RAN	1	1.12796e-19	139.29	VCENIPIVLCGNK(1)VDIK	3	-0.81793	3	1.435	1.493	1.423	0.688	0.703	0.715	0.484	1.2707e-06
Cellular Component	GO:0032797	6	SMN complex	0.101136	Q8TEQ6	860	0.481	Q1	K	Gem-associated protein 5 OS=Homo sapiens OX=9606 GN=GEMIN5 PE=1 SV=3	GEMIN5	1	1.41616e-06	104.88	SK(1)EELHQDCLVLATAK	3	-0.75026	1	1.465	1.457	1.445	0.692	0.739	0.668	0.481	0.00165687
Cellular Component	GO:0032797	6	SMN complex	0.101136	Q8TEQ6	1390	0.329	Q1	K	Gem-associated protein 5 OS=Homo sapiens OX=9606 GN=GEMIN5 PE=1 SV=3	GEMIN5	1	0.000373398	101.65	QHQK(1)SQLCK	3	-1.7575	1	1.637	1.637	1.75	0.557	0.576	0.521	0.329	3.6375e-06
Cellular Component	GO:0032797	6	SMN complex	0.101136	Q9Y3F4	148	0.441	Q1	K	Serine-threonine kinase receptor-associated protein OS=Homo sapiens OX=9606 GN=STRAP PE=1 SV=1	STRAP	1	0.00146412	96.229	K(1)ALWCSEDK	2	-0.98203	1	1.605	1.444	1.478	0.651	0.646	0.698	0.441	3.7532e-05
Cellular Component	GO:0042565	7	RNA nuclear export complex	0.0205593	Q9HAV4	41	0.321	Q1	K	Exportin-5 OS=Homo sapiens OX=9606 GN=XPO5 PE=1 SV=1	XPO5	1	0.00432488	85.355	FCEEFK(1)EK	3	-0.12728	2	1.76	1.666	1.642	0.532	0.523	0.574	0.321	2.8685e-06
Cellular Component	GO:0042565	7	RNA nuclear export complex	0.0205593	P62826	123	0.484	Q1	K	GTP-binding nuclear protein Ran OS=Homo sapiens OX=9606 GN=RAN PE=1 SV=3	RAN	1	1.12796e-19	139.29	VCENIPIVLCGNK(1)VDIK	3	-0.81793	3	1.435	1.493	1.423	0.688	0.703	0.715	0.484	1.2707e-06
Cellular Component	GO:0044853	8	plasma membrane raft	0.0133166	Q9UNF0	167	0.456	Q1	K	Protein kinase C and casein kinase substrate in neurons protein 2 OS=Homo sapiens OX=9606 GN=PACSIN2 PE=1 SV=2	PACSIN2	1	0.00836713	89.827	EEK(1)LAISR	2	2.2291	1	1.553	1.528	1.383	0.68	0.649	0.706	0.456	5.8155e-05
Cellular Component	GO:0044853	8	plasma membrane raft	0.0133166	Q9ULV4	194	0.308	Q1	K	Coronin-1C OS=Homo sapiens OX=9606 GN=CORO1C PE=1 SV=1	CORO1C	1	0.00320052	69.261	NGSLICTASK(1)DK	2	1.4005	2	1.663	1.722	1.748	0.55	0.503	0.528	0.308	1.2137e-06
Cellular Component	GO:0044853	8	plasma membrane raft	0.0133166	P10644	367	0.327	Q1	K	cAMP-dependent protein kinase type I-alpha regulatory subunit OS=Homo sapiens OX=9606 GN=PRKAR1A PE=1 SV=1	PRKAR1A	1	6.36671e-05	106.67	VLGPCSDILK(1)R	2	-0.67679	1	1.637	1.64	1.76	0.573	0.538	0.536	0.327	2.0587e-06
Cellular Component	GO:0044853	8	plasma membrane raft	0.0133166	Q9NZM1	1386	0.358	Q1	K	Myoferlin OS=Homo sapiens OX=9606 GN=MYOF PE=1 SV=1	MYOF	1	0.00733557	69.03	K(1)PVVGQCTIER	3	0.44959	2	1.542	1.597	1.737	0.569	0.6	0.579	0.358	1.59973e-05
Cellular Component	GO:0044853	8	plasma membrane raft	0.0133166	P13861	379	0.477	Q1	K	cAMP-dependent protein kinase type II-alpha regulatory subunit OS=Homo sapiens OX=9606 GN=PRKAR2A PE=1 SV=2	PRKAR2A	1	0.00222902	71.03	LLGPCMDIMK(1)R	3	-0.51879	2	1.403	1.491	1.483	0.719	0.659	0.711	0.477	2.2538e-05
Cellular Component	GO:0044853	8	plasma membrane raft	0.0133166	P35221	120	0.488	Q1	K	Catenin alpha-1 OS=Homo sapiens OX=9606 GN=CTNNA1 PE=1 SV=1	CTNNA1	1	5.50199e-08	107.82	AAAGEFADDPCSSVK(1)R	2	-0.12176	1	1.365	1.42	1.547	0.7	0.659	0.755	0.488	0.000182432
Cellular Component	GO:0031093	12	platelet alpha granule lumen	0.322564	P04075	140	0.462	Q1	K	Fructose-bisphosphate aldolase A OS=Homo sapiens OX=9606 GN=ALDOA PE=1 SV=2	ALDOA	1	0.0246193	73.499	K(1)DGADFAK	3	0.18494	2	1.579	1.444	1.418	0.69	0.684	0.679	0.462	0.00189588
Cellular Component	GO:0031093	12	platelet alpha granule lumen	0.322564	Q9NTK5	79	0.4	Q1	K	Obg-like ATPase 1 OS=Homo sapiens OX=9606 GN=OLA1 PE=1 SV=2	OLA1	1	0.000365518	76.759	FDFLCQYHK(1)PASK	3	-0.85143	1	1.533	1.598	1.561	0.627	0.611	0.638	0.4	3.8724e-07
Cellular Component	GO:0031253	8	cell projection membrane	0.164517	Q9UNF0	167	0.456	Q1	K	Protein kinase C and casein kinase substrate in neurons protein 2 OS=Homo sapiens OX=9606 GN=PACSIN2 PE=1 SV=2	PACSIN2	1	0.00836713	89.827	EEK(1)LAISR	2	2.2291	1	1.553	1.528	1.383	0.68	0.649	0.706	0.456	5.8155e-05
Cellular Component	GO:0031253	8	cell projection membrane	0.164517	P23528	45	0.342	Q1	K	Cofilin-1 OS=Homo sapiens OX=9606 GN=CFL1 PE=1 SV=3	CFL1	1	0.00127427	101.39	K(1)NIILEEGK	2	0.23308	5	1.734	1.655	1.576	0.555	0.587	0.557	0.342	2.6776e-06
Cellular Component	GO:0031253	8	cell projection membrane	0.164517	P23528	44	0.401	Q1	K	Cofilin-1 OS=Homo sapiens OX=9606 GN=CFL1 PE=1 SV=3	CFL1	1	4.72599e-11	153.95	AVLFCLSEDK(1)K	2	-0.65835	3	1.595	1.575	1.523	0.642	0.654	0.585	0.401	1.80522e-05
Cellular Component	GO:0031253	8	cell projection membrane	0.164517	P08238	559	0.479	Q1	K	Heat shock protein HSP 90-beta OS=Homo sapiens OX=9606 GN=HSP90AB1 PE=1 SV=4	HSP90AB1	1	0.00072324	111.17	AK(1)FENLCK	3	-0.027707	2	1.508	1.469	1.398	0.714	0.677	0.704	0.479	1.56421e-05
Cellular Component	GO:0031253	8	cell projection membrane	0.164517	P08238	568	0.153	Q1	K	Heat shock protein HSP 90-beta OS=Homo sapiens OX=9606 GN=HSP90AB1 PE=1 SV=4	HSP90AB1	1	0.0129056	82.417	LMK(1)EILDK	2	-0.52759	1	2.117	2.005	1.986	0.335	0.306	0.291	0.153	1.0451e-06
Cellular Component	GO:0031253	8	cell projection membrane	0.164517	Q9UM54	240	0.316	Q1	K	Unconventional myosin-VI OS=Homo sapiens OX=9606 GN=MYO6 PE=1 SV=4	MYO6	1	0.0165223	70.056	ICVQGK(1)EER	2	-0.27571	1	1.747	1.741	1.607	0.539	0.568	0.505	0.316	1.61137e-05
Cellular Component	GO:0031253	8	cell projection membrane	0.164517	Q9UM54	325	0.466	Q1	K	Unconventional myosin-VI OS=Homo sapiens OX=9606 GN=MYO6 PE=1 SV=4	MYO6	1	0.0271518	81.296	MCTAMK(1)K	2	-0.14267	1	1.465	1.483	1.477	0.704	0.711	0.646	0.466	0.00160093
Cellular Component	GO:0031253	8	cell projection membrane	0.164517	P07900	576	0.235	Q1	K	Heat shock protein HSP 90-alpha OS=Homo sapiens OX=9606 GN=HSP90AA1 PE=1 SV=5	HSP90AA1	1	0.00316475	93.096	IMK(1)DILEK	3	0.51489	4	1.881	1.876	1.791	0.418	0.456	0.43	0.235	5.6281e-07
Cellular Component	GO:0031253	8	cell projection membrane	0.164517	P50570	90	0.247	Q1	K	Dynamin-2 OS=Homo sapiens OX=9606 GN=DNM2 PE=1 SV=2	DNM2	1	0.007979	78.342	K(1)FTDFDEVR	2	-0.55845	1	1.768	1.787	1.917	0.504	0.415	0.435	0.247	2.2772e-05
Cellular Component	GO:0031253	8	cell projection membrane	0.164517	Q9Y490	2445	0.279	Q1	K	Talin-1 OS=Homo sapiens OX=9606 GN=TLN1 PE=1 SV=3	TLN1	1	2.8004e-05	114.7	VK(1)ADQDSEAMK	2	-0.094946	1	1.709	1.766	1.815	0.526	0.472	0.478	0.279	2.4271e-06
Cellular Component	GO:0005913	5	cell-cell adherens junction	0.055949	P15924	2778	0.393	Q1	K	Desmoplakin OS=Homo sapiens OX=9606 GN=DSP PE=1 SV=3	DSP	1	0.00540315	95.775	ILTCPK(1)TK	3	0.28722	2	1.629	1.493	1.603	0.599	0.624	0.634	0.393	3.948e-06
Cellular Component	GO:0005913	5	cell-cell adherens junction	0.055949	P15924	1144	0.478	Q1	K	Desmoplakin OS=Homo sapiens OX=9606 GN=DSP PE=1 SV=3	DSP	1	0.00870934	73.881	NDYDQLQK(1)AR	2	0.6607	1	1.452	1.523	1.398	0.634	0.744	0.711	0.478	0.000159996
Cellular Component	GO:0005913	5	cell-cell adherens junction	0.055949	P15924	1073	0.268	Q1	K	Desmoplakin OS=Homo sapiens OX=9606 GN=DSP PE=1 SV=3	DSP	1	0.00126733	75.102	YQAECSQFK(1)AK	2	-0.57564	2	1.782	1.777	1.795	0.487	0.466	0.48	0.268	3.1201e-08
Cellular Component	GO:0005913	5	cell-cell adherens junction	0.055949	P15924	478	0.411	Q1	K	Desmoplakin OS=Homo sapiens OX=9606 GN=DSP PE=1 SV=3	DSP	1	0.000142635	91.961	IVHK(1)GDECILK	3	0.58642	1	1.575	1.541	1.528	0.623	0.661	0.627	0.411	9.0198e-07
Cellular Component	GO:0005913	5	cell-cell adherens junction	0.055949	Q99497	62	0.381	Q1	K	Protein/nucleic acid deglycase DJ-1 OS=Homo sapiens OX=9606 GN=PARK7 PE=1 SV=2	PARK7	1	2.72946e-27	162.29	DVVICPDASLEDAK(1)K	2	-0.16613	1	1.505	1.635	1.635	0.609	0.57	0.638	0.381	2.1387e-05
Cellular Component	GO:0005913	5	cell-cell adherens junction	0.055949	P35579	180	0.355	Q1	K	Myosin-9 OS=Homo sapiens OX=9606 GN=MYH9 PE=1 SV=4	MYH9	1	5.30441e-22	143.04	EDQSILCTGESGAGK(1)TENTK	3	-0.56027	1	1.567	1.76	1.57	0.594	0.577	0.566	0.355	1.72257e-05
Cellular Component	GO:0005913	5	cell-cell adherens junction	0.055949	P35579	565	0.403	Q1	K	Myosin-9 OS=Homo sapiens OX=9606 GN=MYH9 PE=1 SV=4	MYH9	1	0.00243053	54.898	DK(1)ADFCIIHYAGK	3	-0.65742	1	1.575	1.478	1.63	0.589	0.674	0.622	0.403	4.3735e-05
Cellular Component	GO:0005913	5	cell-cell adherens junction	0.055949	O60716	448	0.494	Q1	K	Catenin delta-1 OS=Homo sapiens OX=9606 GN=CTNND1 PE=1 SV=1	CTNND1	1	1.1653e-10	125.47	IAIK(1)NCDGVPALVR	3	1.9491	2	1.454	1.467	1.396	0.71	0.723	0.699	0.494	1.3007e-06
Cellular Component	GO:0005913	5	cell-cell adherens junction	0.055949	O60716	846	0.494	Q1	K	Catenin delta-1 OS=Homo sapiens OX=9606 GN=CTNND1 PE=1 SV=1	CTNND1	1	0.000757674	89.507	K(1)SDFQVNLNNASR	2	4.4664	1	1.431	1.414	1.468	0.7	0.699	0.732	0.494	1.4922e-06
Cellular Component	GO:0005913	5	cell-cell adherens junction	0.055949	P18206	316	0.374	Q1	K	Vinculin OS=Homo sapiens OX=9606 GN=VCL PE=1 SV=4	VCL	1	0.0100094	72.34	VGELCAGK(1)ER	2	-1.6995	1	1.722	1.618	1.478	0.627	0.582	0.593	0.374	3.9318e-05
Cellular Component	GO:0005913	5	cell-cell adherens junction	0.055949	P35221	120	0.488	Q1	K	Catenin alpha-1 OS=Homo sapiens OX=9606 GN=CTNNA1 PE=1 SV=1	CTNNA1	1	5.50199e-08	107.82	AAAGEFADDPCSSVK(1)R	2	-0.12176	1	1.365	1.42	1.547	0.7	0.659	0.755	0.488	0.000182432
Cellular Component	GO:0005913	5	cell-cell adherens junction	0.055949	O00151	294	0.483	Q1	K	PDZ and LIM domain protein 1 OS=Homo sapiens OX=9606 GN=PDLIM1 PE=1 SV=4	PDLIM1	1	9.67413e-05	66.022	HPECYVCTDCGTNLK(1)QK	3	-1.3955	1	1.309	1.579	1.467	0.737	0.699	0.666	0.483	0.00030086
Cellular Component	GO:0034702	7	ion channel complex	0.322564	O00299	166	0.49	Q1	K	Chloride intracellular channel protein 1 OS=Homo sapiens OX=9606 GN=CLIC1 PE=1 SV=4	CLIC1	1	3.02602e-14	127.32	K(1)FLDGNELTLADCNLLPK	3	0.41049	1	1.504	1.463	1.365	0.706	0.645	0.77	0.49	0.00025982
Cellular Component	GO:0034702	7	ion channel complex	0.322564	Q12797	646	0.392	Q1	K	Aspartyl/asparaginyl beta-hydroxylase OS=Homo sapiens OX=9606 GN=ASPH PE=1 SV=3	ASPH	1	0.000150126	98.942	GAPK(1)TCTLLEK	3	0.49951	2	1.584	1.579	1.567	0.626	0.608	0.62	0.392	2.7434e-08
Cellular Component	GO:0070937	8	CRD-mediated mRNA stability complex	0.208434	Q08211	467	0.496	Q1	K	ATP-dependent RNA helicase A OS=Homo sapiens OX=9606 GN=DHX9 PE=1 SV=4	DHX9	1	5.82684e-13	138.19	GEEPGK(1)SCGYSVR	2	0.64535	1	1.347	1.5	1.457	0.733	0.662	0.74	0.496	0.000123788
Cellular Component	GO:0070937	8	CRD-mediated mRNA stability complex	0.208434	Q00839	495	0.459	Q1	K	Heterogeneous nuclear ribonucleoprotein U OS=Homo sapiens OX=9606 GN=HNRNPU PE=1 SV=6	HNRNPU	1	0.000338111	63.691	K(1)DCEVVMMIGLPGAGK	3	-1.0615	2	1.4	1.528	1.52	0.711	0.636	0.694	0.459	6.0225e-05
Cellular Component	GO:0070937	8	CRD-mediated mRNA stability complex	0.208434	Q00839	387	0.38	Q1	K	Heterogeneous nuclear ribonucleoprotein U OS=Homo sapiens OX=9606 GN=HNRNPU PE=1 SV=6	HNRNPU	1	5.34412e-06	99.344	GIK(1)TCNCETEDYGEK	3	0.12476	1	1.496	1.565	1.715	0.555	0.687	0.573	0.38	0.00023794
Cellular Component	GO:0070937	8	CRD-mediated mRNA stability complex	0.208434	Q00839	565	0.42	Q1	K	Heterogeneous nuclear ribonucleoprotein U OS=Homo sapiens OX=9606 GN=HNRNPU PE=1 SV=6	HNRNPU	1	6.4142e-07	108.09	APQCLGK(1)FIEIAAR	2	-1.2209	2	1.588	1.557	1.462	0.609	0.626	0.7	0.42	6.0565e-05
Cellular Component	GO:0070937	8	CRD-mediated mRNA stability complex	0.208434	Q00839	609	0.321	Q1	K	Heterogeneous nuclear ribonucleoprotein U OS=Homo sapiens OX=9606 GN=HNRNPU PE=1 SV=6	HNRNPU	1	2.39004e-06	111.79	AVVVCPK(1)DEDYK	2	0.46828	2	1.735	1.64	1.692	0.524	0.563	0.54	0.321	8.752e-07
Cellular Component	GO:0097014	7	ciliary plasm	0.208434	Q8TD57	2921	0.476	Q1	K	Dynein heavy chain 3, axonemal OS=Homo sapiens OX=9606 GN=DNAH3 PE=2 SV=1	DNAH3	1	0.0106296	49.189	LAAQMQK(1)LNQK	2	-1.4123	1	1.444	1.498	1.439	0.637	0.719	0.728	0.476	7.733e-05
Cellular Component	GO:0097014	7	ciliary plasm	0.208434	Q16181	208	0.405	Q1	K	Septin-7 OS=Homo sapiens OX=9606 GN=SEPTIN7 PE=1 SV=2	SEPTIN7	1	6.18208e-46	200.19	ADTLTPEECQQFK(1)K	2	0.48685	5	1.584	1.532	1.557	0.624	0.625	0.642	0.405	1.4162e-07
Cellular Component	GO:0044666	14	MLL3/4 complex	0.101136	Q8NEZ4	758	0.436	Q1	K	Histone-lysine N-methyltransferase 2C OS=Homo sapiens OX=9606 GN=KMT2C PE=1 SV=3	KMT2C	1	1.59482e-15	166.6	DVSYQGGK(1)SIK	2	-0.421	2	1.508	1.513	1.523	0.677	0.667	0.635	0.436	0.00055665
Cellular Component	GO:0044666	14	MLL3/4 complex	0.101136	P61964	159	0.483	Q1	K	WD repeat-containing protein 5 OS=Homo sapiens OX=9606 GN=WDR5 PE=1 SV=1	WDR5	1	0.0091824	88.495	IWDVK(1)TGK	3	0.80805	2	1.444	1.439	1.473	0.691	0.714	0.7	0.483	2.2067e-07
Cellular Component	GO:0005635	10	nuclear envelope	0.0055334	P23921	414	0.201	Q1	K	Ribonucleoside-diphosphate reductase large subunit OS=Homo sapiens OX=9606 GN=RRM1 PE=1 SV=1	RRM1	1	3.90941e-15	159.66	K(1)SNQQNLGTIK	2	0.94274	1	1.843	2.011	1.903	0.412	0.374	0.373	0.201	1.3358e-06
Cellular Component	GO:0005635	10	nuclear envelope	0.0055334	O14980	103	0.351	Q1	K	Exportin-1 OS=Homo sapiens OX=9606 GN=XPO1 PE=1 SV=1	XPO1	1	0.00322946	107.79	NQCEGIK(1)K	3	-2.6199	2	1.685	1.659	1.58	0.601	0.573	0.553	0.351	2.2658e-06
Cellular Component	GO:0005635	10	nuclear envelope	0.0055334	O14980	122	0.347	Q1	K	Exportin-1 OS=Homo sapiens OX=9606 GN=XPO1 PE=1 SV=1	XPO1	1	2.0108e-07	125.53	TSSDPTCVEK(1)EK	3	-1.7379	2	1.706	1.593	1.643	0.587	0.569	0.558	0.347	8.8605e-07
Cellular Component	GO:0005635	10	nuclear envelope	0.0055334	O00299	166	0.49	Q1	K	Chloride intracellular channel protein 1 OS=Homo sapiens OX=9606 GN=CLIC1 PE=1 SV=4	CLIC1	1	3.02602e-14	127.32	K(1)FLDGNELTLADCNLLPK	3	0.41049	1	1.504	1.463	1.365	0.706	0.645	0.77	0.49	0.00025982
Cellular Component	GO:0005635	10	nuclear envelope	0.0055334	P11717	1285	0.431	Q1	K	Cation-independent mannose-6-phosphate receptor OS=Homo sapiens OX=9606 GN=IGF2R PE=1 SV=3	IGF2R	1	0.0187544	68.657	VVSSCQEK(1)R	2	-1.3987	1	1.571	1.542	1.451	0.618	0.683	0.664	0.431	2.2521e-05
Cellular Component	GO:0005635	10	nuclear envelope	0.0055334	Q8NC56	256	0.333	Q1	K	LEM domain-containing protein 2 OS=Homo sapiens OX=9606 GN=LEMD2 PE=1 SV=1	LEMD2	1	0.00148969	103.91	K(1)TDEFCQAK	2	-0.026333	1	1.714	1.657	1.637	0.556	0.561	0.551	0.333	9.5812e-08
Cellular Component	GO:0005635	10	nuclear envelope	0.0055334	P49792	1332	0.254	Q1	K	E3 SUMO-protein ligase RanBP2 OS=Homo sapiens OX=9606 GN=RANBP2 PE=1 SV=2	RANBP2	1	0.00029099	85.554	EPTSHDNK(1)DICK	3	-1.5358	1	1.751	1.825	1.852	0.407	0.466	0.503	0.254	2.3978e-05
Cellular Component	GO:0005635	10	nuclear envelope	0.0055334	P49792	2581	0.143	Q1	K	E3 SUMO-protein ligase RanBP2 OS=Homo sapiens OX=9606 GN=RANBP2 PE=1 SV=2	RANBP2	0.995422	1.20345e-09	117.65	K(0.005)CELSK(0.995)NSDIEQSSDSK	3	-0.64278	1	2.129	2.071	1.971	0.279	0.301	0.304	0.143	3.2447e-07
Cellular Component	GO:0005635	10	nuclear envelope	0.0055334	P49792	2138	0.256	Q1	K	E3 SUMO-protein ligase RanBP2 OS=Homo sapiens OX=9606 GN=RANBP2 PE=1 SV=2	RANBP2	1	0.00316207	107.21	QK(1)FEECQR	2	0.11464	1	1.752	1.82	1.844	0.454	0.437	0.496	0.256	2.3285e-06
Cellular Component	GO:0005635	10	nuclear envelope	0.0055334	P49792	3034	0.452	Q1	K	E3 SUMO-protein ligase RanBP2 OS=Homo sapiens OX=9606 GN=RANBP2 PE=1 SV=2	RANBP2	1	0.00441888	101.65	EVADCFK(1)K	2	-0.79272	1	1.454	1.469	1.548	0.634	0.709	0.679	0.452	3.5313e-05
Cellular Component	GO:0005635	10	nuclear envelope	0.0055334	Q9NUU7	343	0.497	Q1	K	ATP-dependent RNA helicase DDX19A OS=Homo sapiens OX=9606 GN=DDX19A PE=1 SV=1	DDX19A	1	6.00522e-10	139.58	K(1)TASWLAAELSK	2	-0.2171	1	1.404	1.445	1.452	0.681	0.735	0.723	0.497	1.52266e-05
Cellular Component	GO:0005635	10	nuclear envelope	0.0055334	Q9Y3I0	492	0.44	Q1	K	tRNA-splicing ligase RtcB homolog OS=Homo sapiens OX=9606 GN=RTCB PE=1 SV=1	RTCB	1	5.61267e-20	143.46	NVTDVVNTCHDAGISK(1)K	3	0.34213	1	1.513	1.461	1.548	0.612	0.7	0.677	0.44	4.3542e-05
Cellular Component	GO:0005635	10	nuclear envelope	0.0055334	Q9UM54	240	0.316	Q1	K	Unconventional myosin-VI OS=Homo sapiens OX=9606 GN=MYO6 PE=1 SV=4	MYO6	1	0.0165223	70.056	ICVQGK(1)EER	2	-0.27571	1	1.747	1.741	1.607	0.539	0.568	0.505	0.316	1.61137e-05
Cellular Component	GO:0005635	10	nuclear envelope	0.0055334	Q9UM54	325	0.466	Q1	K	Unconventional myosin-VI OS=Homo sapiens OX=9606 GN=MYO6 PE=1 SV=4	MYO6	1	0.0271518	81.296	MCTAMK(1)K	2	-0.14267	1	1.465	1.483	1.477	0.704	0.711	0.646	0.466	0.00160093
Cellular Component	GO:0005635	10	nuclear envelope	0.0055334	P62826	123	0.484	Q1	K	GTP-binding nuclear protein Ran OS=Homo sapiens OX=9606 GN=RAN PE=1 SV=3	RAN	1	1.12796e-19	139.29	VCENIPIVLCGNK(1)VDIK	3	-0.81793	3	1.435	1.493	1.423	0.688	0.703	0.715	0.484	1.2707e-06
Cellular Component	GO:0005635	10	nuclear envelope	0.0055334	Q9BZF1	723	0.308	Q1	K	Oxysterol-binding protein-related protein 8 OS=Homo sapiens OX=9606 GN=OSBPL8 PE=1 SV=3	OSBPL8	1	0.00193928	91.961	TK(1)NEEWSCK	2	-0.38205	1	1.813	1.677	1.649	0.554	0.493	0.537	0.308	1.66199e-05
Cellular Component	GO:0005635	10	nuclear envelope	0.0055334	Q9GZV4	27	0.482	Q1	K	Eukaryotic translation initiation factor 5A-2 OS=Homo sapiens OX=9606 GN=EIF5A2 PE=1 SV=3	EIF5A2	1	0.033182	76.064	K(1)NGFVVLK	3	-0.01779	2	1.424	1.491	1.449	0.743	0.761	0.599	0.482	0.00068034
Cellular Component	GO:0005635	10	nuclear envelope	0.0055334	Q9GZV4	34	0.247	Q1	K	Eukaryotic translation initiation factor 5A-2 OS=Homo sapiens OX=9606 GN=EIF5A2 PE=1 SV=3	EIF5A2	1	0.000289488	93.096	KNGFVVLK(1)GR	3	0.33973	4	1.911	1.741	1.829	0.459	0.442	0.452	0.247	5.5759e-07
Cellular Component	GO:0005635	10	nuclear envelope	0.0055334	Q9BZE4	332	0.15	Q1	K	Nucleolar GTP-binding protein 1 OS=Homo sapiens OX=9606 GN=GTPBP4 PE=1 SV=3	GTPBP4	1	0.00532492	96.171	VK(1)TEACDR	2	2.2313	1	2.029	2.082	2.009	0.302	0.319	0.295	0.15	9.7261e-08
Cellular Component	GO:0005635	10	nuclear envelope	0.0055334	P42166	334	0.492	Q1	K	Lamina-associated polypeptide 2, isoform alpha OS=Homo sapiens OX=9606 GN=TMPO PE=1 SV=2	TMPO	1	8.27814e-07	118.08	EK(1)SGIQPLCPER	2	0.52641	2	1.459	1.358	1.508	0.711	0.683	0.732	0.492	4.1488e-05
Cellular Component	GO:0005635	10	nuclear envelope	0.0055334	P43487	154	0.361	Q1	K	Ran-specific GTPase-activating protein OS=Homo sapiens OX=9606 GN=RANBP1 PE=1 SV=1	RANBP1	1	0.0233636	83.948	TK(1)FEECR	2	-0.64741	1	1.725	1.586	1.563	0.591	0.591	0.579	0.361	2.7355e-06
Cellular Component	GO:0005635	10	nuclear envelope	0.0055334	Q9P0L0	52	0.307	Q1	K	Vesicle-associated membrane protein-associated protein A OS=Homo sapiens OX=9606 GN=VAPA PE=1 SV=3	VAPA	1	0.0183623	88.819	VK(1)TTAPR	2	0.92096	1	1.883	1.543	1.719	0.5	0.456	0.622	0.307	0.0003986
Cellular Component	GO:0005635	10	nuclear envelope	0.0055334	P55735	192	0.494	Q1	K	Protein SEC13 homolog OS=Homo sapiens OX=9606 GN=SEC13 PE=1 SV=3	SEC13	1	0.000354026	70.889	FASGGCDNLIK(1)LWK	3	-1.05	1	1.463	1.414	1.438	0.682	0.745	0.705	0.494	1.69329e-05
Cellular Component	GO:0005635	10	nuclear envelope	0.0055334	P49903	341	0.44	Q1	K	Selenide, water dikinase 1 OS=Homo sapiens OX=9606 GN=SEPHS1 PE=1 SV=2	SEPHS1	1	0.0142304	72.2	FCAEIK(1)SPK	2	0.66242	2	1.537	1.468	1.52	0.635	0.688	0.668	0.44	3.5775e-06
Cellular Component	GO:0005635	10	nuclear envelope	0.0055334	P63279	49	0.356	Q1	K	SUMO-conjugating enzyme UBC9 OS=Homo sapiens OX=9606 GN=UBE2I PE=1 SV=1	UBE2I	1	0.00141737	86.699	K(1)GTPWEGGLFK	3	0.37048	2	1.601	1.604	1.683	0.538	0.568	0.634	0.356	3.7389e-05
Cellular Component	GO:0005635	10	nuclear envelope	0.0055334	Q9NZM1	1386	0.358	Q1	K	Myoferlin OS=Homo sapiens OX=9606 GN=MYOF PE=1 SV=1	MYOF	1	0.00733557	69.03	K(1)PVVGQCTIER	3	0.44959	2	1.542	1.597	1.737	0.569	0.6	0.579	0.358	1.59973e-05
Cellular Component	GO:0005635	10	nuclear envelope	0.0055334	P43034	360	0.433	Q1	K	Platelet-activating factor acetylhydrolase IB subunit alpha OS=Homo sapiens OX=9606 GN=PAFAH1B1 PE=1 SV=2	PAFAH1B1	1	0.00320332	72.705	FILSCADDK(1)TLR	2	0.75147	1	1.351	1.606	1.584	0.52	0.74	0.704	0.433	0.0023609
Cellular Component	GO:0005635	10	nuclear envelope	0.0055334	Q14573	258	0.471	Q1	K	Inositol 1,4,5-trisphosphate receptor type 3 OS=Homo sapiens OX=9606 GN=ITPR3 PE=1 SV=2	ITPR3	1	0.000333363	105.13	FLTCDEYK(1)GK	2	-1.2035	2	1.529	1.425	1.454	0.707	0.674	0.693	0.471	3.6728e-06
Cellular Component	GO:0044448	10	cell cortex part	0.0244686	P21333	578	0.272	Q1	K	Filamin-A OS=Homo sapiens OX=9606 GN=FLNA PE=1 SV=4	FLNA	1	0.000120036	101.56	VGTECGNQK(1)VR	2	-0.21816	1	1.73	1.815	1.784	0.486	0.476	0.485	0.272	6.0056e-08
Cellular Component	GO:0044448	10	cell cortex part	0.0244686	P21333	2000	0.359	Q1	K	Filamin-A OS=Homo sapiens OX=9606 GN=FLNA PE=1 SV=4	FLNA	1	0.0408648	66.692	EEPCLLK(1)R	2	-0.50213	1	1.675	1.62	1.586	0.582	0.588	0.583	0.359	1.8799e-07
Cellular Component	GO:0044448	10	cell cortex part	0.0244686	P21333	1450	0.495	Q1	K	Filamin-A OS=Homo sapiens OX=9606 GN=FLNA PE=1 SV=4	FLNA	1	0.00011233	90.793	VPVHDVTDASK(1)VK	3	0.48724	1	1.479	1.441	1.393	0.691	0.679	0.764	0.495	6.2437e-05
Cellular Component	GO:0044448	10	cell cortex part	0.0244686	Q12797	646	0.392	Q1	K	Aspartyl/asparaginyl beta-hydroxylase OS=Homo sapiens OX=9606 GN=ASPH PE=1 SV=3	ASPH	1	0.000150126	98.942	GAPK(1)TCTLLEK	3	0.49951	2	1.584	1.579	1.567	0.626	0.608	0.62	0.392	2.7434e-08
Cellular Component	GO:0044448	10	cell cortex part	0.0244686	P35579	180	0.355	Q1	K	Myosin-9 OS=Homo sapiens OX=9606 GN=MYH9 PE=1 SV=4	MYH9	1	5.30441e-22	143.04	EDQSILCTGESGAGK(1)TENTK	3	-0.56027	1	1.567	1.76	1.57	0.594	0.577	0.566	0.355	1.72257e-05
Cellular Component	GO:0044448	10	cell cortex part	0.0244686	P35579	565	0.403	Q1	K	Myosin-9 OS=Homo sapiens OX=9606 GN=MYH9 PE=1 SV=4	MYH9	1	0.00243053	54.898	DK(1)ADFCIIHYAGK	3	-0.65742	1	1.575	1.478	1.63	0.589	0.674	0.622	0.403	4.3735e-05
Cellular Component	GO:0044448	10	cell cortex part	0.0244686	P18206	316	0.374	Q1	K	Vinculin OS=Homo sapiens OX=9606 GN=VCL PE=1 SV=4	VCL	1	0.0100094	72.34	VGELCAGK(1)ER	2	-1.6995	1	1.722	1.618	1.478	0.627	0.582	0.593	0.374	3.9318e-05
Cellular Component	GO:0044448	10	cell cortex part	0.0244686	P60981	30	0.396	Q1	K	Destrin OS=Homo sapiens OX=9606 GN=DSTN PE=1 SV=3	DSTN	1	0.00172616	93.096	CSTPEEIK(1)K	3	-1.0849	3	1.589	1.587	1.536	0.613	0.602	0.649	0.396	1.6318e-06
Cellular Component	GO:0044448	10	cell cortex part	0.0244686	Q14847	50	0.459	Q1	K	LIM and SH3 domain protein 1 OS=Homo sapiens OX=9606 GN=LASP1 PE=1 SV=2	LASP1	1	0.010633	57.785	K(1)PYCNAHYPK	3	-0.53436	2	1.432	1.49	1.529	0.706	0.675	0.66	0.459	4.5956e-06
Cellular Component	GO:0044448	10	cell cortex part	0.0244686	Q9BZF1	723	0.308	Q1	K	Oxysterol-binding protein-related protein 8 OS=Homo sapiens OX=9606 GN=OSBPL8 PE=1 SV=3	OSBPL8	1	0.00193928	91.961	TK(1)NEEWSCK	2	-0.38205	1	1.813	1.677	1.649	0.554	0.493	0.537	0.308	1.66199e-05
Cellular Component	GO:0044448	10	cell cortex part	0.0244686	Q16181	208	0.405	Q1	K	Septin-7 OS=Homo sapiens OX=9606 GN=SEPTIN7 PE=1 SV=2	SEPTIN7	1	6.18208e-46	200.19	ADTLTPEECQQFK(1)K	2	0.48685	5	1.584	1.532	1.557	0.624	0.625	0.642	0.405	1.4162e-07
Cellular Component	GO:0031965	11	nuclear membrane	0.0371152	O14980	103	0.351	Q1	K	Exportin-1 OS=Homo sapiens OX=9606 GN=XPO1 PE=1 SV=1	XPO1	1	0.00322946	107.79	NQCEGIK(1)K	3	-2.6199	2	1.685	1.659	1.58	0.601	0.573	0.553	0.351	2.2658e-06
Cellular Component	GO:0031965	11	nuclear membrane	0.0371152	O14980	122	0.347	Q1	K	Exportin-1 OS=Homo sapiens OX=9606 GN=XPO1 PE=1 SV=1	XPO1	1	2.0108e-07	125.53	TSSDPTCVEK(1)EK	3	-1.7379	2	1.706	1.593	1.643	0.587	0.569	0.558	0.347	8.8605e-07
Cellular Component	GO:0031965	11	nuclear membrane	0.0371152	O00299	166	0.49	Q1	K	Chloride intracellular channel protein 1 OS=Homo sapiens OX=9606 GN=CLIC1 PE=1 SV=4	CLIC1	1	3.02602e-14	127.32	K(1)FLDGNELTLADCNLLPK	3	0.41049	1	1.504	1.463	1.365	0.706	0.645	0.77	0.49	0.00025982
Cellular Component	GO:0031965	11	nuclear membrane	0.0371152	Q8NC56	256	0.333	Q1	K	LEM domain-containing protein 2 OS=Homo sapiens OX=9606 GN=LEMD2 PE=1 SV=1	LEMD2	1	0.00148969	103.91	K(1)TDEFCQAK	2	-0.026333	1	1.714	1.657	1.637	0.556	0.561	0.551	0.333	9.5812e-08
Cellular Component	GO:0031965	11	nuclear membrane	0.0371152	P49792	1332	0.254	Q1	K	E3 SUMO-protein ligase RanBP2 OS=Homo sapiens OX=9606 GN=RANBP2 PE=1 SV=2	RANBP2	1	0.00029099	85.554	EPTSHDNK(1)DICK	3	-1.5358	1	1.751	1.825	1.852	0.407	0.466	0.503	0.254	2.3978e-05
Cellular Component	GO:0031965	11	nuclear membrane	0.0371152	P49792	2581	0.143	Q1	K	E3 SUMO-protein ligase RanBP2 OS=Homo sapiens OX=9606 GN=RANBP2 PE=1 SV=2	RANBP2	0.995422	1.20345e-09	117.65	K(0.005)CELSK(0.995)NSDIEQSSDSK	3	-0.64278	1	2.129	2.071	1.971	0.279	0.301	0.304	0.143	3.2447e-07
Cellular Component	GO:0031965	11	nuclear membrane	0.0371152	P49792	2138	0.256	Q1	K	E3 SUMO-protein ligase RanBP2 OS=Homo sapiens OX=9606 GN=RANBP2 PE=1 SV=2	RANBP2	1	0.00316207	107.21	QK(1)FEECQR	2	0.11464	1	1.752	1.82	1.844	0.454	0.437	0.496	0.256	2.3285e-06
Cellular Component	GO:0031965	11	nuclear membrane	0.0371152	P49792	3034	0.452	Q1	K	E3 SUMO-protein ligase RanBP2 OS=Homo sapiens OX=9606 GN=RANBP2 PE=1 SV=2	RANBP2	1	0.00441888	101.65	EVADCFK(1)K	2	-0.79272	1	1.454	1.469	1.548	0.634	0.709	0.679	0.452	3.5313e-05
Cellular Component	GO:0031965	11	nuclear membrane	0.0371152	Q9BZE4	332	0.15	Q1	K	Nucleolar GTP-binding protein 1 OS=Homo sapiens OX=9606 GN=GTPBP4 PE=1 SV=3	GTPBP4	1	0.00532492	96.171	VK(1)TEACDR	2	2.2313	1	2.029	2.082	2.009	0.302	0.319	0.295	0.15	9.7261e-08
Cellular Component	GO:0031965	11	nuclear membrane	0.0371152	Q9P0L0	52	0.307	Q1	K	Vesicle-associated membrane protein-associated protein A OS=Homo sapiens OX=9606 GN=VAPA PE=1 SV=3	VAPA	1	0.0183623	88.819	VK(1)TTAPR	2	0.92096	1	1.883	1.543	1.719	0.5	0.456	0.622	0.307	0.0003986
Cellular Component	GO:0031965	11	nuclear membrane	0.0371152	Q9NUU7	343	0.497	Q1	K	ATP-dependent RNA helicase DDX19A OS=Homo sapiens OX=9606 GN=DDX19A PE=1 SV=1	DDX19A	1	6.00522e-10	139.58	K(1)TASWLAAELSK	2	-0.2171	1	1.404	1.445	1.452	0.681	0.735	0.723	0.497	1.52266e-05
Cellular Component	GO:0031965	11	nuclear membrane	0.0371152	P49903	341	0.44	Q1	K	Selenide, water dikinase 1 OS=Homo sapiens OX=9606 GN=SEPHS1 PE=1 SV=2	SEPHS1	1	0.0142304	72.2	FCAEIK(1)SPK	2	0.66242	2	1.537	1.468	1.52	0.635	0.688	0.668	0.44	3.5775e-06
Cellular Component	GO:0031965	11	nuclear membrane	0.0371152	Q9UM54	240	0.316	Q1	K	Unconventional myosin-VI OS=Homo sapiens OX=9606 GN=MYO6 PE=1 SV=4	MYO6	1	0.0165223	70.056	ICVQGK(1)EER	2	-0.27571	1	1.747	1.741	1.607	0.539	0.568	0.505	0.316	1.61137e-05
Cellular Component	GO:0031965	11	nuclear membrane	0.0371152	Q9UM54	325	0.466	Q1	K	Unconventional myosin-VI OS=Homo sapiens OX=9606 GN=MYO6 PE=1 SV=4	MYO6	1	0.0271518	81.296	MCTAMK(1)K	2	-0.14267	1	1.465	1.483	1.477	0.704	0.711	0.646	0.466	0.00160093
Cellular Component	GO:0031965	11	nuclear membrane	0.0371152	Q9NZM1	1386	0.358	Q1	K	Myoferlin OS=Homo sapiens OX=9606 GN=MYOF PE=1 SV=1	MYOF	1	0.00733557	69.03	K(1)PVVGQCTIER	3	0.44959	2	1.542	1.597	1.737	0.569	0.6	0.579	0.358	1.59973e-05
Cellular Component	GO:0031965	11	nuclear membrane	0.0371152	P43034	360	0.433	Q1	K	Platelet-activating factor acetylhydrolase IB subunit alpha OS=Homo sapiens OX=9606 GN=PAFAH1B1 PE=1 SV=2	PAFAH1B1	1	0.00320332	72.705	FILSCADDK(1)TLR	2	0.75147	1	1.351	1.606	1.584	0.52	0.74	0.704	0.433	0.0023609
Cellular Component	GO:0031965	11	nuclear membrane	0.0371152	Q9BZF1	723	0.308	Q1	K	Oxysterol-binding protein-related protein 8 OS=Homo sapiens OX=9606 GN=OSBPL8 PE=1 SV=3	OSBPL8	1	0.00193928	91.961	TK(1)NEEWSCK	2	-0.38205	1	1.813	1.677	1.649	0.554	0.493	0.537	0.308	1.66199e-05
Cellular Component	GO:0031965	11	nuclear membrane	0.0371152	Q14573	258	0.471	Q1	K	Inositol 1,4,5-trisphosphate receptor type 3 OS=Homo sapiens OX=9606 GN=ITPR3 PE=1 SV=2	ITPR3	1	0.000333363	105.13	FLTCDEYK(1)GK	2	-1.2035	2	1.529	1.425	1.454	0.707	0.674	0.693	0.471	3.6728e-06
Cellular Component	GO:0098827	10	endoplasmic reticulum subcompartment	0.322564	Q12797	646	0.392	Q1	K	Aspartyl/asparaginyl beta-hydroxylase OS=Homo sapiens OX=9606 GN=ASPH PE=1 SV=3	ASPH	1	0.000150126	98.942	GAPK(1)TCTLLEK	3	0.49951	2	1.584	1.579	1.567	0.626	0.608	0.62	0.392	2.7434e-08
Cellular Component	GO:0098827	10	endoplasmic reticulum subcompartment	0.322564	Q9BZF1	723	0.308	Q1	K	Oxysterol-binding protein-related protein 8 OS=Homo sapiens OX=9606 GN=OSBPL8 PE=1 SV=3	OSBPL8	1	0.00193928	91.961	TK(1)NEEWSCK	2	-0.38205	1	1.813	1.677	1.649	0.554	0.493	0.537	0.308	1.66199e-05
Cellular Component	GO:0016459	10	myosin complex	0.127008	P35579	180	0.355	Q1	K	Myosin-9 OS=Homo sapiens OX=9606 GN=MYH9 PE=1 SV=4	MYH9	1	5.30441e-22	143.04	EDQSILCTGESGAGK(1)TENTK	3	-0.56027	1	1.567	1.76	1.57	0.594	0.577	0.566	0.355	1.72257e-05
Cellular Component	GO:0016459	10	myosin complex	0.127008	P35579	565	0.403	Q1	K	Myosin-9 OS=Homo sapiens OX=9606 GN=MYH9 PE=1 SV=4	MYH9	1	0.00243053	54.898	DK(1)ADFCIIHYAGK	3	-0.65742	1	1.575	1.478	1.63	0.589	0.674	0.622	0.403	4.3735e-05
Cellular Component	GO:0016459	10	myosin complex	0.127008	Q9UM54	240	0.316	Q1	K	Unconventional myosin-VI OS=Homo sapiens OX=9606 GN=MYO6 PE=1 SV=4	MYO6	1	0.0165223	70.056	ICVQGK(1)EER	2	-0.27571	1	1.747	1.741	1.607	0.539	0.568	0.505	0.316	1.61137e-05
Cellular Component	GO:0016459	10	myosin complex	0.127008	Q9UM54	325	0.466	Q1	K	Unconventional myosin-VI OS=Homo sapiens OX=9606 GN=MYO6 PE=1 SV=4	MYO6	1	0.0271518	81.296	MCTAMK(1)K	2	-0.14267	1	1.465	1.483	1.477	0.704	0.711	0.646	0.466	0.00160093
Cellular Component	GO:0016459	10	myosin complex	0.127008	Q92614	1429	0.474	Q1	K	Unconventional myosin-XVIIIa OS=Homo sapiens OX=9606 GN=MYO18A PE=1 SV=3	MYO18A	1	0.000436442	127.84	ALQQLK(1)K	2	0.50423	1	1.45	1.472	1.466	0.671	0.71	0.7	0.474	9.1511e-07
Cellular Component	GO:0031461	7	cullin-RING ubiquitin ligase complex	0.378437	P63208	66	0.411	Q1	K	S-phase kinase-associated protein 1 OS=Homo sapiens OX=9606 GN=SKP1 PE=1 SV=2	SKP1	1	2.05841e-10	84.327	VIQWCTHHK(1)DDPPPPEDDENKEK	5	0.029289	1	1.562	1.461	1.627	0.671	0.605	0.633	0.411	3.6657e-05
Cellular Component	GO:0031461	7	cullin-RING ubiquitin ligase complex	0.378437	Q86VP6	1156	0.274	Q1	K	Cullin-associated NEDD8-dissociated protein 1 OS=Homo sapiens OX=9606 GN=CAND1 PE=1 SV=2	CAND1	1	0.0029114	109.66	ATCTTK(1)VK	2	-0.76433	1	1.718	1.882	1.712	0.446	0.471	0.538	0.274	3.721e-05
Cellular Component	GO:0033180	7	proton-transporting V-type ATPase, V1 domain	0.0558099	P38606	132	0.405	Q1	K	V-type proton ATPase catalytic subunit A OS=Homo sapiens OX=9606 GN=ATP6V1A PE=1 SV=2	ATP6V1A	1	0.000353207	107.09	DIK(1)WDFTPCK	2	-0.13164	2	1.639	1.537	1.502	0.652	0.641	0.6	0.405	1.77762e-05
Cellular Component	GO:0033180	7	proton-transporting V-type ATPase, V1 domain	0.0558099	P21281	109	0.48	Q1	K	V-type proton ATPase subunit B, brain isoform OS=Homo sapiens OX=9606 GN=ATP6V1B2 PE=1 SV=3	ATP6V1B2	1	0.000924525	87.718	K(1)TSCEFTGDILR	3	-0.37516	3	1.482	1.45	1.439	0.716	0.687	0.694	0.48	5.5611e-07
Cellular Component	GO:0005818	11	aster	0.0205593	Q14980	73	0.492	Q1	K	Nuclear mitotic apparatus protein 1 OS=Homo sapiens OX=9606 GN=NUMA1 PE=1 SV=2	NUMA1	1	0.000365798	79.652	K(1)HPSSPECLVSAQK	3	-1.1446	1	1.499	1.405	1.421	0.698	0.705	0.725	0.492	3.285e-06
Cellular Component	GO:0005818	11	aster	0.0205593	Q14980	303	0.293	Q1	K	Nuclear mitotic apparatus protein 1 OS=Homo sapiens OX=9606 GN=NUMA1 PE=1 SV=2	NUMA1	1	3.57606e-05	134.13	QCQDLK(1)TEK	2	0.098392	2	1.777	1.74	1.697	0.489	0.495	0.545	0.293	2.4028e-06
Cellular Component	GO:0005818	11	aster	0.0205593	P43034	360	0.433	Q1	K	Platelet-activating factor acetylhydrolase IB subunit alpha OS=Homo sapiens OX=9606 GN=PAFAH1B1 PE=1 SV=2	PAFAH1B1	1	0.00320332	72.705	FILSCADDK(1)TLR	2	0.75147	1	1.351	1.606	1.584	0.52	0.74	0.704	0.433	0.0023609
Cellular Component	GO:0031672	11	A band	0.265507	P04075	140	0.462	Q1	K	Fructose-bisphosphate aldolase A OS=Homo sapiens OX=9606 GN=ALDOA PE=1 SV=2	ALDOA	1	0.0246193	73.499	K(1)DGADFAK	3	0.18494	2	1.579	1.444	1.418	0.69	0.684	0.679	0.462	0.00189588
Cellular Component	GO:0031672	11	A band	0.265507	P06733	335	0.433	Q1	K	Alpha-enolase OS=Homo sapiens OX=9606 GN=ENO1 PE=1 SV=2	ENO1	1	9.75047e-11	130.72	AVNEK(1)SCNCLLLK	2	0.29651	6	1.575	1.526	1.454	0.656	0.66	0.657	0.433	0.00077832
Cellular Component	GO:0005915	6	zonula adherens	0.023434	O60716	448	0.494	Q1	K	Catenin delta-1 OS=Homo sapiens OX=9606 GN=CTNND1 PE=1 SV=1	CTNND1	1	1.1653e-10	125.47	IAIK(1)NCDGVPALVR	3	1.9491	2	1.454	1.467	1.396	0.71	0.723	0.699	0.494	1.3007e-06
Cellular Component	GO:0005915	6	zonula adherens	0.023434	O60716	846	0.494	Q1	K	Catenin delta-1 OS=Homo sapiens OX=9606 GN=CTNND1 PE=1 SV=1	CTNND1	1	0.000757674	89.507	K(1)SDFQVNLNNASR	2	4.4664	1	1.431	1.414	1.468	0.7	0.699	0.732	0.494	1.4922e-06
Cellular Component	GO:0005915	6	zonula adherens	0.023434	P18206	316	0.374	Q1	K	Vinculin OS=Homo sapiens OX=9606 GN=VCL PE=1 SV=4	VCL	1	0.0100094	72.34	VGELCAGK(1)ER	2	-1.6995	1	1.722	1.618	1.478	0.627	0.582	0.593	0.374	3.9318e-05
Cellular Component	GO:0005915	6	zonula adherens	0.023434	P35221	120	0.488	Q1	K	Catenin alpha-1 OS=Homo sapiens OX=9606 GN=CTNNA1 PE=1 SV=1	CTNNA1	1	5.50199e-08	107.82	AAAGEFADDPCSSVK(1)R	2	-0.12176	1	1.365	1.42	1.547	0.7	0.659	0.755	0.488	0.000182432
Cellular Component	GO:0044449	9	contractile fiber part	0.180673	P21333	578	0.272	Q1	K	Filamin-A OS=Homo sapiens OX=9606 GN=FLNA PE=1 SV=4	FLNA	1	0.000120036	101.56	VGTECGNQK(1)VR	2	-0.21816	1	1.73	1.815	1.784	0.486	0.476	0.485	0.272	6.0056e-08
Cellular Component	GO:0044449	9	contractile fiber part	0.180673	P21333	2000	0.359	Q1	K	Filamin-A OS=Homo sapiens OX=9606 GN=FLNA PE=1 SV=4	FLNA	1	0.0408648	66.692	EEPCLLK(1)R	2	-0.50213	1	1.675	1.62	1.586	0.582	0.588	0.583	0.359	1.8799e-07
Cellular Component	GO:0044449	9	contractile fiber part	0.180673	P21333	1450	0.495	Q1	K	Filamin-A OS=Homo sapiens OX=9606 GN=FLNA PE=1 SV=4	FLNA	1	0.00011233	90.793	VPVHDVTDASK(1)VK	3	0.48724	1	1.479	1.441	1.393	0.691	0.679	0.764	0.495	6.2437e-05
Cellular Component	GO:0044449	9	contractile fiber part	0.180673	P04075	140	0.462	Q1	K	Fructose-bisphosphate aldolase A OS=Homo sapiens OX=9606 GN=ALDOA PE=1 SV=2	ALDOA	1	0.0246193	73.499	K(1)DGADFAK	3	0.18494	2	1.579	1.444	1.418	0.69	0.684	0.679	0.462	0.00189588
Cellular Component	GO:0044449	9	contractile fiber part	0.180673	Q15149	4576	0.476	Q1	K	Plectin OS=Homo sapiens OX=9606 GN=PLEC PE=1 SV=3	PLEC	1	0.00380529	103.88	YLTCPK(1)TK	3	-0.20071	2	1.483	1.446	1.456	0.71	0.693	0.685	0.476	2.7992e-07
Cellular Component	GO:0044449	9	contractile fiber part	0.180673	P06733	335	0.433	Q1	K	Alpha-enolase OS=Homo sapiens OX=9606 GN=ENO1 PE=1 SV=2	ENO1	1	9.75047e-11	130.72	AVNEK(1)SCNCLLLK	2	0.29651	6	1.575	1.526	1.454	0.656	0.66	0.657	0.433	0.00077832
Cellular Component	GO:0044449	9	contractile fiber part	0.180673	P47756	57	0.424	Q1	K	F-actin-capping protein subunit beta OS=Homo sapiens OX=9606 GN=CAPZB PE=1 SV=4	CAPZB	1	9.4043e-13	133.47	VVGK(1)DYLLCDYNR	3	-1.9206	2	1.509	1.551	1.529	0.644	0.679	0.623	0.424	2.622e-06
Cellular Component	GO:0044449	9	contractile fiber part	0.180673	P18206	316	0.374	Q1	K	Vinculin OS=Homo sapiens OX=9606 GN=VCL PE=1 SV=4	VCL	1	0.0100094	72.34	VGELCAGK(1)ER	2	-1.6995	1	1.722	1.618	1.478	0.627	0.582	0.593	0.374	3.9318e-05
Cellular Component	GO:0071541	9	eukaryotic translation initiation factor 3 complex, eIF3m	0.265507	O15372	180	0.383	Q1	K	Eukaryotic translation initiation factor 3 subunit H OS=Homo sapiens OX=9606 GN=EIF3H PE=1 SV=1	EIF3H	1	0.000139172	116.24	EK(1)DFSPEALK	3	1.7709	2	1.582	1.612	1.575	0.598	0.606	0.622	0.383	1.1966e-07
Cellular Component	GO:0071541	9	eukaryotic translation initiation factor 3 complex, eIF3m	0.265507	Q13347	141	0.239	Q1	K	Eukaryotic translation initiation factor 3 subunit I OS=Homo sapiens OX=9606 GN=EIF3I PE=1 SV=1	EIF3I	1	1.15565e-06	80.382	DPSQIDNNEPYMK(1)IPCNDSK	3	-0.76402	1	1.732	1.919	1.87	0.497	0.388	0.432	0.239	5.5522e-05
Cellular Component	GO:0072669	6	tRNA-splicing ligase complex	0.0104837	Q52LJ0	292	0.289	Q1	K	Protein FAM98B OS=Homo sapiens OX=9606 GN=FAM98B PE=1 SV=2	FAM98B	1	0.000934336	116.55	EK(1)TACAINK	3	1.0442	2	1.757	1.731	1.744	0.479	0.517	0.518	0.289	5.8873e-07
Cellular Component	GO:0072669	6	tRNA-splicing ligase complex	0.0104837	Q52LJ0	299	0.442	Q1	K	Protein FAM98B OS=Homo sapiens OX=9606 GN=FAM98B PE=1 SV=2	FAM98B	1	0.000456253	91.939	TACAINK(1)VLMGR	2	-1.6285	1	1.515	1.473	1.529	0.616	0.709	0.67	0.442	4.112e-05
Cellular Component	GO:0072669	6	tRNA-splicing ligase complex	0.0104837	Q9Y3I0	492	0.44	Q1	K	tRNA-splicing ligase RtcB homolog OS=Homo sapiens OX=9606 GN=RTCB PE=1 SV=1	RTCB	1	5.61267e-20	143.46	NVTDVVNTCHDAGISK(1)K	3	0.34213	1	1.513	1.461	1.548	0.612	0.7	0.677	0.44	4.3542e-05
Cellular Component	GO:0072669	6	tRNA-splicing ligase complex	0.0104837	Q92499	234	0.498	Q1	K	ATP-dependent RNA helicase DDX1 OS=Homo sapiens OX=9606 GN=DDX1 PE=1 SV=2	DDX1	1	9.11479e-13	128.71	NQALFPACVLK(1)NAELK	3	0.095706	3	1.391	1.44	1.473	0.764	0.684	0.694	0.498	5.7082e-05
Cellular Component	GO:0012507	12	ER to Golgi transport vesicle membrane	0.378437	P55735	192	0.494	Q1	K	Protein SEC13 homolog OS=Homo sapiens OX=9606 GN=SEC13 PE=1 SV=3	SEC13	1	0.000354026	70.889	FASGGCDNLIK(1)LWK	3	-1.05	1	1.463	1.414	1.438	0.682	0.745	0.705	0.494	1.69329e-05
Cellular Component	GO:0012507	12	ER to Golgi transport vesicle membrane	0.378437	O94979	647	0.456	Q1	K	Protein transport protein Sec31A OS=Homo sapiens OX=9606 GN=SEC31A PE=1 SV=3	SEC31A	1	0.00188721	79.492	EIVESCDLK(1)NWR	2	-1.025	1	1.508	1.403	1.547	0.619	0.677	0.736	0.456	0.000164778
Cellular Component	GO:0042470	10	melanosome	0.0480362	P62820	131	0.394	Q1	K	Ras-related protein Rab-1A OS=Homo sapiens OX=9606 GN=RAB1A PE=1 SV=3	RAB1A	1	0.00887163	101.72	CDLTTK(1)K	2	-1.4943	1	1.672	1.534	1.52	0.627	0.649	0.585	0.394	2.347e-05
Cellular Component	GO:0042470	10	melanosome	0.0480362	P04843	538	0.417	Q1	K	Dolichyl-diphosphooligosaccharide--protein glycosyltransferase subunit 1 OS=Homo sapiens OX=9606 GN=RPN1 PE=1 SV=1	RPN1	1	0.000596927	91.62	LK(1)TEGSDLCDR	3	-0.056382	2	1.554	1.514	1.55	0.636	0.655	0.637	0.417	1.3213e-07
Cellular Component	GO:0042470	10	melanosome	0.0480362	P50991	292	0.438	Q1	K	T-complex protein 1 subunit delta OS=Homo sapiens OX=9606 GN=CCT4 PE=1 SV=4	CCT4	1	1.33037e-06	131.06	K(1)TGCNVLLIQK	2	-1.0315	3	1.553	1.521	1.461	0.65	0.647	0.688	0.438	3.2357e-06
Cellular Component	GO:0042470	10	melanosome	0.0480362	Q06830	178	0.453	Q1	K	Peroxiredoxin-1 OS=Homo sapiens OX=9606 GN=PRDX1 PE=1 SV=1	PRDX1	0.999997	5.6436e-11	97.69	HGEVCPAGWK(1)PGSDTIKPDVQK	5	0.01739	4	1.498	1.509	1.469	0.721	0.688	0.619	0.453	6.26e-05
Cellular Component	GO:0042470	10	melanosome	0.0480362	P08238	559	0.479	Q1	K	Heat shock protein HSP 90-beta OS=Homo sapiens OX=9606 GN=HSP90AB1 PE=1 SV=4	HSP90AB1	1	0.00072324	111.17	AK(1)FENLCK	3	-0.027707	2	1.508	1.469	1.398	0.714	0.677	0.704	0.479	1.56421e-05
Cellular Component	GO:0042470	10	melanosome	0.0480362	P08238	568	0.153	Q1	K	Heat shock protein HSP 90-beta OS=Homo sapiens OX=9606 GN=HSP90AB1 PE=1 SV=4	HSP90AB1	1	0.0129056	82.417	LMK(1)EILDK	2	-0.52759	1	2.117	2.005	1.986	0.335	0.306	0.291	0.153	1.0451e-06
Cellular Component	GO:0042470	10	melanosome	0.0480362	P21281	109	0.48	Q1	K	V-type proton ATPase subunit B, brain isoform OS=Homo sapiens OX=9606 GN=ATP6V1B2 PE=1 SV=3	ATP6V1B2	1	0.000924525	87.718	K(1)TSCEFTGDILR	3	-0.37516	3	1.482	1.45	1.439	0.716	0.687	0.694	0.48	5.5611e-07
Cellular Component	GO:0042470	10	melanosome	0.0480362	P30101	94	0.42	Q1	K	Protein disulfide-isomerase A3 OS=Homo sapiens OX=9606 GN=PDIA3 PE=1 SV=4	PDIA3	1	3.5914e-41	161.47	VDCTANTNTCNK(1)YGVSGYPTLK	4	-0.65929	5	1.559	1.492	1.558	0.681	0.625	0.63	0.42	4.8366e-06
Cellular Component	GO:0042470	10	melanosome	0.0480362	P30101	415	0.45	Q1	K	Protein disulfide-isomerase A3 OS=Homo sapiens OX=9606 GN=PDIA3 PE=1 SV=4	PDIA3	1	0.0215894	85.676	NLEPK(1)YK	3	0.15336	4	1.566	1.535	1.386	0.673	0.669	0.679	0.45	0.0022784
Cellular Component	GO:0042470	10	melanosome	0.0480362	P30101	82	0.469	Q1	K	Protein disulfide-isomerase A3 OS=Homo sapiens OX=9606 GN=PDIA3 PE=1 SV=4	PDIA3	1	6.15521e-11	117.18	GIVPLAK(1)VDCTANTNTCNK	3	-0.14257	4	1.365	1.513	1.526	0.693	0.669	0.704	0.469	4.061e-05
Cellular Component	GO:0042470	10	melanosome	0.0480362	P07900	576	0.235	Q1	K	Heat shock protein HSP 90-alpha OS=Homo sapiens OX=9606 GN=HSP90AA1 PE=1 SV=5	HSP90AA1	1	0.00316475	93.096	IMK(1)DILEK	3	0.51489	4	1.881	1.876	1.791	0.418	0.456	0.43	0.235	5.6281e-07
Cellular Component	GO:0042470	10	melanosome	0.0480362	P07237	308	0.278	Q1	K	Protein disulfide-isomerase OS=Homo sapiens OX=9606 GN=P4HB PE=1 SV=3	P4HB	1	0.00332344	86.898	ILEFFGLK(1)K	3	-0.031928	2	1.755	1.698	1.841	0.452	0.513	0.506	0.278	1.51387e-05
Cellular Component	GO:0042470	10	melanosome	0.0480362	P07237	309	0.424	Q1	K	Protein disulfide-isomerase OS=Homo sapiens OX=9606 GN=P4HB PE=1 SV=3	P4HB	1	0.00170122	121.64	K(1)EECPAVR	3	0.4143	2	1.6	1.521	1.471	0.613	0.641	0.691	0.424	3.7866e-05
Cellular Component	GO:0042470	10	melanosome	0.0480362	P62826	123	0.484	Q1	K	GTP-binding nuclear protein Ran OS=Homo sapiens OX=9606 GN=RAN PE=1 SV=3	RAN	1	1.12796e-19	139.29	VCENIPIVLCGNK(1)VDIK	3	-0.81793	3	1.435	1.493	1.423	0.688	0.703	0.715	0.484	1.2707e-06
Cellular Component	GO:0042470	10	melanosome	0.0480362	Q8WUM4	234	0.284	Q1	K	Programmed cell death 6-interacting protein OS=Homo sapiens OX=9606 GN=PDCD6IP PE=1 SV=1	PDCD6IP	1	4.05874e-05	122.7	QCQYK(1)DTLPK	2	-2.2661	2	1.797	1.8	1.665	0.489	0.513	0.495	0.284	9.0293e-07
Cellular Component	GO:0030134	10	ER to Golgi transport vesicle	0.242038	P55735	192	0.494	Q1	K	Protein SEC13 homolog OS=Homo sapiens OX=9606 GN=SEC13 PE=1 SV=3	SEC13	1	0.000354026	70.889	FASGGCDNLIK(1)LWK	3	-1.05	1	1.463	1.414	1.438	0.682	0.745	0.705	0.494	1.69329e-05
Cellular Component	GO:0030134	10	ER to Golgi transport vesicle	0.242038	Q9UBR2	166	0.449	Q1	K	Cathepsin Z OS=Homo sapiens OX=9606 GN=CTSZ PE=1 SV=1	CTSZ	1	0.000205059	60.764	DQECDK(1)FNQCGTCNEFK	3	-1.2451	1	1.478	1.62	1.39	0.638	0.761	0.617	0.449	0.00052197
Cellular Component	GO:0030134	10	ER to Golgi transport vesicle	0.242038	O94979	647	0.456	Q1	K	Protein transport protein Sec31A OS=Homo sapiens OX=9606 GN=SEC31A PE=1 SV=3	SEC31A	1	0.00188721	79.492	EIVESCDLK(1)NWR	2	-1.025	1	1.508	1.403	1.547	0.619	0.677	0.736	0.456	0.000164778
Cellular Component	GO:0098862	4	cluster of actin-based cell projections	0.0376634	P61158	240	0.393	Q1	K	Actin-related protein 3 OS=Homo sapiens OX=9606 GN=ACTR3 PE=1 SV=3	ACTR3	1	1.55569e-05	98.337	YSYVCPDLVK(1)EFNK	3	2.9551	2	1.592	1.567	1.567	0.63	0.614	0.613	0.393	4.4494e-08
Cellular Component	GO:0098862	4	cluster of actin-based cell projections	0.0376634	O00299	166	0.49	Q1	K	Chloride intracellular channel protein 1 OS=Homo sapiens OX=9606 GN=CLIC1 PE=1 SV=4	CLIC1	1	3.02602e-14	127.32	K(1)FLDGNELTLADCNLLPK	3	0.41049	1	1.504	1.463	1.365	0.706	0.645	0.77	0.49	0.00025982
Cellular Component	GO:0098862	4	cluster of actin-based cell projections	0.0376634	Q15149	4576	0.476	Q1	K	Plectin OS=Homo sapiens OX=9606 GN=PLEC PE=1 SV=3	PLEC	1	0.00380529	103.88	YLTCPK(1)TK	3	-0.20071	2	1.483	1.446	1.456	0.71	0.693	0.685	0.476	2.7992e-07
Cellular Component	GO:0098862	4	cluster of actin-based cell projections	0.0376634	P35579	180	0.355	Q1	K	Myosin-9 OS=Homo sapiens OX=9606 GN=MYH9 PE=1 SV=4	MYH9	1	5.30441e-22	143.04	EDQSILCTGESGAGK(1)TENTK	3	-0.56027	1	1.567	1.76	1.57	0.594	0.577	0.566	0.355	1.72257e-05
Cellular Component	GO:0098862	4	cluster of actin-based cell projections	0.0376634	P35579	565	0.403	Q1	K	Myosin-9 OS=Homo sapiens OX=9606 GN=MYH9 PE=1 SV=4	MYH9	1	0.00243053	54.898	DK(1)ADFCIIHYAGK	3	-0.65742	1	1.575	1.478	1.63	0.589	0.674	0.622	0.403	4.3735e-05
Cellular Component	GO:0098862	4	cluster of actin-based cell projections	0.0376634	P18206	316	0.374	Q1	K	Vinculin OS=Homo sapiens OX=9606 GN=VCL PE=1 SV=4	VCL	1	0.0100094	72.34	VGELCAGK(1)ER	2	-1.6995	1	1.722	1.618	1.478	0.627	0.582	0.593	0.374	3.9318e-05
Cellular Component	GO:0098862	4	cluster of actin-based cell projections	0.0376634	P08238	559	0.479	Q1	K	Heat shock protein HSP 90-beta OS=Homo sapiens OX=9606 GN=HSP90AB1 PE=1 SV=4	HSP90AB1	1	0.00072324	111.17	AK(1)FENLCK	3	-0.027707	2	1.508	1.469	1.398	0.714	0.677	0.704	0.479	1.56421e-05
Cellular Component	GO:0098862	4	cluster of actin-based cell projections	0.0376634	P08238	568	0.153	Q1	K	Heat shock protein HSP 90-beta OS=Homo sapiens OX=9606 GN=HSP90AB1 PE=1 SV=4	HSP90AB1	1	0.0129056	82.417	LMK(1)EILDK	2	-0.52759	1	2.117	2.005	1.986	0.335	0.306	0.291	0.153	1.0451e-06
Cellular Component	GO:0098862	4	cluster of actin-based cell projections	0.0376634	Q14573	258	0.471	Q1	K	Inositol 1,4,5-trisphosphate receptor type 3 OS=Homo sapiens OX=9606 GN=ITPR3 PE=1 SV=2	ITPR3	1	0.000333363	105.13	FLTCDEYK(1)GK	2	-1.2035	2	1.529	1.425	1.454	0.707	0.674	0.693	0.471	3.6728e-06
Cellular Component	GO:0098862	4	cluster of actin-based cell projections	0.0376634	P43034	360	0.433	Q1	K	Platelet-activating factor acetylhydrolase IB subunit alpha OS=Homo sapiens OX=9606 GN=PAFAH1B1 PE=1 SV=2	PAFAH1B1	1	0.00320332	72.705	FILSCADDK(1)TLR	2	0.75147	1	1.351	1.606	1.584	0.52	0.74	0.704	0.433	0.0023609
Cellular Component	GO:0043025	6	neuronal cell body	0.0883721	P23921	414	0.201	Q1	K	Ribonucleoside-diphosphate reductase large subunit OS=Homo sapiens OX=9606 GN=RRM1 PE=1 SV=1	RRM1	1	3.90941e-15	159.66	K(1)SNQQNLGTIK	2	0.94274	1	1.843	2.011	1.903	0.412	0.374	0.373	0.201	1.3358e-06
Cellular Component	GO:0043025	6	neuronal cell body	0.0883721	P21333	578	0.272	Q1	K	Filamin-A OS=Homo sapiens OX=9606 GN=FLNA PE=1 SV=4	FLNA	1	0.000120036	101.56	VGTECGNQK(1)VR	2	-0.21816	1	1.73	1.815	1.784	0.486	0.476	0.485	0.272	6.0056e-08
Cellular Component	GO:0043025	6	neuronal cell body	0.0883721	P21333	2000	0.359	Q1	K	Filamin-A OS=Homo sapiens OX=9606 GN=FLNA PE=1 SV=4	FLNA	1	0.0408648	66.692	EEPCLLK(1)R	2	-0.50213	1	1.675	1.62	1.586	0.582	0.588	0.583	0.359	1.8799e-07
Cellular Component	GO:0043025	6	neuronal cell body	0.0883721	P21333	1450	0.495	Q1	K	Filamin-A OS=Homo sapiens OX=9606 GN=FLNA PE=1 SV=4	FLNA	1	0.00011233	90.793	VPVHDVTDASK(1)VK	3	0.48724	1	1.479	1.441	1.393	0.691	0.679	0.764	0.495	6.2437e-05
Cellular Component	GO:0043025	6	neuronal cell body	0.0883721	P23528	45	0.342	Q1	K	Cofilin-1 OS=Homo sapiens OX=9606 GN=CFL1 PE=1 SV=3	CFL1	1	0.00127427	101.39	K(1)NIILEEGK	2	0.23308	5	1.734	1.655	1.576	0.555	0.587	0.557	0.342	2.6776e-06
Cellular Component	GO:0043025	6	neuronal cell body	0.0883721	P23528	44	0.401	Q1	K	Cofilin-1 OS=Homo sapiens OX=9606 GN=CFL1 PE=1 SV=3	CFL1	1	4.72599e-11	153.95	AVLFCLSEDK(1)K	2	-0.65835	3	1.595	1.575	1.523	0.642	0.654	0.585	0.401	1.80522e-05
Cellular Component	GO:0043025	6	neuronal cell body	0.0883721	Q7L576	516	0.465	Q1	K	Cytoplasmic FMR1-interacting protein 1 OS=Homo sapiens OX=9606 GN=CYFIP1 PE=1 SV=1	CYFIP1	1	2.47216e-06	84.107	K(1)TVCDWETGHEPFNDPALR	3	0.46049	1	1.526	1.529	1.372	0.613	0.778	0.666	0.465	0.00060253
Cellular Component	GO:0043025	6	neuronal cell body	0.0883721	Q14155	725	0.484	Q1	K	Rho guanine nucleotide exchange factor 7 OS=Homo sapiens OX=9606 GN=ARHGEF7 PE=1 SV=2	ARHGEF7	1	0.00865446	62.162	VIEAYCTSAK(1)TR	2	1.6091	1	1.645	1.352	1.365	0.703	0.725	0.683	0.484	0.00039998
Cellular Component	GO:0043025	6	neuronal cell body	0.0883721	Q9UD71	152	0.452	Q1	K	Protein phosphatase 1 regulatory subunit 1B OS=Homo sapiens OX=9606 GN=PPP1R1B PE=1 SV=2	PPP1R1B	1	4.97004e-20	100.86	QSAGQK(1)TTCGQGLEGPWERPPPLDESER	3	-0.61595	2	1.578	1.531	1.369	0.662	0.628	0.736	0.452	0.00023867
Cellular Component	GO:0043025	6	neuronal cell body	0.0883721	O95696	418	0.444	Q1	K	Bromodomain-containing protein 1 OS=Homo sapiens OX=9606 GN=BRD1 PE=1 SV=1	BRD1	1	0.00333527	96.143	ESSVK(1)TVR	2	-0.4281	2	1.549	1.478	1.482	0.669	0.649	0.686	0.444	1.6456e-06
Cellular Component	GO:0043025	6	neuronal cell body	0.0883721	Q14980	73	0.492	Q1	K	Nuclear mitotic apparatus protein 1 OS=Homo sapiens OX=9606 GN=NUMA1 PE=1 SV=2	NUMA1	1	0.000365798	79.652	K(1)HPSSPECLVSAQK	3	-1.1446	1	1.499	1.405	1.421	0.698	0.705	0.725	0.492	3.285e-06
Cellular Component	GO:0043025	6	neuronal cell body	0.0883721	Q14980	303	0.293	Q1	K	Nuclear mitotic apparatus protein 1 OS=Homo sapiens OX=9606 GN=NUMA1 PE=1 SV=2	NUMA1	1	3.57606e-05	134.13	QCQDLK(1)TEK	2	0.098392	2	1.777	1.74	1.697	0.489	0.495	0.545	0.293	2.4028e-06
Cellular Component	GO:0043025	6	neuronal cell body	0.0883721	P43034	360	0.433	Q1	K	Platelet-activating factor acetylhydrolase IB subunit alpha OS=Homo sapiens OX=9606 GN=PAFAH1B1 PE=1 SV=2	PAFAH1B1	1	0.00320332	72.705	FILSCADDK(1)TLR	2	0.75147	1	1.351	1.606	1.584	0.52	0.74	0.704	0.433	0.0023609
Cellular Component	GO:0043025	6	neuronal cell body	0.0883721	Q14573	258	0.471	Q1	K	Inositol 1,4,5-trisphosphate receptor type 3 OS=Homo sapiens OX=9606 GN=ITPR3 PE=1 SV=2	ITPR3	1	0.000333363	105.13	FLTCDEYK(1)GK	2	-1.2035	2	1.529	1.425	1.454	0.707	0.674	0.693	0.471	3.6728e-06
Cellular Component	GO:1904813	12	ficolin-1-rich granule lumen	0.0132058	P04075	140	0.462	Q1	K	Fructose-bisphosphate aldolase A OS=Homo sapiens OX=9606 GN=ALDOA PE=1 SV=2	ALDOA	1	0.0246193	73.499	K(1)DGADFAK	3	0.18494	2	1.579	1.444	1.418	0.69	0.684	0.679	0.462	0.00189588
Cellular Component	GO:1904813	12	ficolin-1-rich granule lumen	0.0132058	P13639	571	0.45	Q1	K	Elongation factor 2 OS=Homo sapiens OX=9606 GN=EEF2 PE=1 SV=4	EEF2	1	3.14699e-17	154.28	DLEEDHACIPIK(1)K	2	-0.69618	3	1.467	1.535	1.479	0.652	0.65	0.715	0.45	1.99925e-05
Cellular Component	GO:1904813	12	ficolin-1-rich granule lumen	0.0132058	P13639	594	0.491	Q1	K	Elongation factor 2 OS=Homo sapiens OX=9606 GN=EEF2 PE=1 SV=4	EEF2	1	1.69803e-09	110.12	ETVSEESNVLCLSK(1)SPNK	3	-0.52971	1	1.437	1.587	1.307	0.754	0.662	0.709	0.491	0.00046028
Cellular Component	GO:1904813	12	ficolin-1-rich granule lumen	0.0132058	Q15008	349	0.366	Q1	K	26S proteasome non-ATPase regulatory subunit 6 OS=Homo sapiens OX=9606 GN=PSMD6 PE=1 SV=1	PSMD6	1	2.45272e-05	93.226	IDK(1)VNEIVETNRPDSK	4	0.090022	2	1.596	1.624	1.626	0.576	0.6	0.598	0.366	1.2631e-07
Cellular Component	GO:1904813	12	ficolin-1-rich granule lumen	0.0132058	Q86VP6	1156	0.274	Q1	K	Cullin-associated NEDD8-dissociated protein 1 OS=Homo sapiens OX=9606 GN=CAND1 PE=1 SV=2	CAND1	1	0.0029114	109.66	ATCTTK(1)VK	2	-0.76433	1	1.718	1.882	1.712	0.446	0.471	0.538	0.274	3.721e-05
Cellular Component	GO:1904813	12	ficolin-1-rich granule lumen	0.0132058	P18206	316	0.374	Q1	K	Vinculin OS=Homo sapiens OX=9606 GN=VCL PE=1 SV=4	VCL	1	0.0100094	72.34	VGELCAGK(1)ER	2	-1.6995	1	1.722	1.618	1.478	0.627	0.582	0.593	0.374	3.9318e-05
Cellular Component	GO:1904813	12	ficolin-1-rich granule lumen	0.0132058	P12268	242	0.477	Q1	K	Inosine-5'-monophosphate dehydrogenase 2 OS=Homo sapiens OX=9606 GN=IMPDH2 PE=1 SV=2	IMPDH2	1	7.99619e-10	116.13	K(1)QLLCGAAIGTHEDDKYR	4	-0.11491	2	1.559	1.417	1.411	0.705	0.718	0.668	0.477	4.2938e-05
Cellular Component	GO:1904813	12	ficolin-1-rich granule lumen	0.0132058	P08238	559	0.479	Q1	K	Heat shock protein HSP 90-beta OS=Homo sapiens OX=9606 GN=HSP90AB1 PE=1 SV=4	HSP90AB1	1	0.00072324	111.17	AK(1)FENLCK	3	-0.027707	2	1.508	1.469	1.398	0.714	0.677	0.704	0.479	1.56421e-05
Cellular Component	GO:1904813	12	ficolin-1-rich granule lumen	0.0132058	P08238	568	0.153	Q1	K	Heat shock protein HSP 90-beta OS=Homo sapiens OX=9606 GN=HSP90AB1 PE=1 SV=4	HSP90AB1	1	0.0129056	82.417	LMK(1)EILDK	2	-0.52759	1	2.117	2.005	1.986	0.335	0.306	0.291	0.153	1.0451e-06
Cellular Component	GO:1904813	12	ficolin-1-rich granule lumen	0.0132058	O00231	295	0.478	Q1	K	26S proteasome non-ATPase regulatory subunit 11 OS=Homo sapiens OX=9606 GN=PSMD11 PE=1 SV=3	PSMD11	1	0.001407	96.342	CVAQASK(1)NR	2	-0.83892	1	1.327	1.442	1.601	0.681	0.715	0.692	0.478	0.000198007
Cellular Component	GO:1904813	12	ficolin-1-rich granule lumen	0.0132058	P09429	50	0.498	Q1	K	High mobility group protein B1 OS=Homo sapiens OX=9606 GN=HMGB1 PE=1 SV=3	HMGB1	1	0.0185525	64.567	WK(1)TMSAK	3	-0.52405	1	1.515	1.361	1.429	0.766	0.686	0.694	0.498	0.000119089
Cellular Component	GO:1904813	12	ficolin-1-rich granule lumen	0.0132058	Q7Z6Z7	476	0.494	Q1	K	E3 ubiquitin-protein ligase HUWE1 OS=Homo sapiens OX=9606 GN=HUWE1 PE=1 SV=3	HUWE1	1	0.00238767	90.15	ECPFVIK(1)PK	3	-0.18576	2	1.503	1.397	1.415	0.66	0.686	0.785	0.494	0.00024261
Cellular Component	GO:1904813	12	ficolin-1-rich granule lumen	0.0132058	Q9UBR2	166	0.449	Q1	K	Cathepsin Z OS=Homo sapiens OX=9606 GN=CTSZ PE=1 SV=1	CTSZ	1	0.000205059	60.764	DQECDK(1)FNQCGTCNEFK	3	-1.2451	1	1.478	1.62	1.39	0.638	0.761	0.617	0.449	0.00052197
Cellular Component	GO:1904813	12	ficolin-1-rich granule lumen	0.0132058	P07900	576	0.235	Q1	K	Heat shock protein HSP 90-alpha OS=Homo sapiens OX=9606 GN=HSP90AA1 PE=1 SV=5	HSP90AA1	1	0.00316475	93.096	IMK(1)DILEK	3	0.51489	4	1.881	1.876	1.791	0.418	0.456	0.43	0.235	5.6281e-07
Cellular Component	GO:1904813	12	ficolin-1-rich granule lumen	0.0132058	P17980	125	0.237	Q1	K	26S proteasome regulatory subunit 6A OS=Homo sapiens OX=9606 GN=PSMC3 PE=1 SV=3	PSMC3	1	0.00143165	104.05	CAVIK(1)TSTR	2	-2.0264	1	1.899	1.947	1.692	0.467	0.463	0.384	0.237	4.4152e-05
Cellular Component	GO:1904813	12	ficolin-1-rich granule lumen	0.0132058	P17980	245	0.411	Q1	K	26S proteasome regulatory subunit 6A OS=Homo sapiens OX=9606 GN=PSMC3 PE=1 SV=3	PSMC3	1	1.931e-13	150.11	ACAAQTK(1)ATFLK	2	0.060852	2	1.561	1.511	1.576	0.622	0.649	0.638	0.411	4.732e-07
Cellular Component	GO:1904813	12	ficolin-1-rich granule lumen	0.0132058	P14618	162	0.464	Q1	K	Pyruvate kinase PKM OS=Homo sapiens OX=9606 GN=PKM PE=1 SV=4	PKM	1	6.49953e-05	90.725	CDENILWLDYK(1)NICK	3	-0.11353	1	1.459	1.39	1.578	0.656	0.756	0.643	0.464	0.00025908
Cellular Component	GO:1904813	12	ficolin-1-rich granule lumen	0.0132058	P14618	322	0.414	Q1	K	Pyruvate kinase PKM OS=Homo sapiens OX=9606 GN=PKM PE=1 SV=4	PKM	1	4.11221e-09	110.12	AGK(1)PVICATQMLESMIK	3	0.3365	2	1.583	1.521	1.528	0.626	0.629	0.664	0.414	1.32e-06
Cellular Component	GO:1904813	12	ficolin-1-rich granule lumen	0.0132058	P53396	630	0.343	Q1	K	ATP-citrate synthase OS=Homo sapiens OX=9606 GN=ACLY PE=1 SV=3	ACLY	1	1.34053e-06	87.088	GVTIIGPATVGGIK(1)PGCFK	3	0.10544	1	1.69	1.666	1.604	0.553	0.597	0.549	0.343	2.0904e-06
Cellular Component	GO:1904813	12	ficolin-1-rich granule lumen	0.0132058	P62937	49	0.371	Q1	K	Peptidyl-prolyl cis-trans isomerase A OS=Homo sapiens OX=9606 GN=PPIA PE=1 SV=2	PPIA	1	2.07978e-08	135.86	GFGYK(1)GSCFHR	2	-0.93186	3	1.604	1.598	1.62	0.613	0.593	0.585	0.371	1.3649e-07
Cellular Component	GO:1904813	12	ficolin-1-rich granule lumen	0.0132058	P62937	44	0.344	Q1	K	Peptidyl-prolyl cis-trans isomerase A OS=Homo sapiens OX=9606 GN=PPIA PE=1 SV=2	PPIA	1	4.67539e-18	164.68	ALSTGEK(1)GFGYK	2	0.16756	2	1.622	1.668	1.664	0.597	0.567	0.54	0.344	1.939e-06
Cellular Component	GO:0033017	11	sarcoplasmic reticulum membrane	0.152938	Q12797	646	0.392	Q1	K	Aspartyl/asparaginyl beta-hydroxylase OS=Homo sapiens OX=9606 GN=ASPH PE=1 SV=3	ASPH	1	0.000150126	98.942	GAPK(1)TCTLLEK	3	0.49951	2	1.584	1.579	1.567	0.626	0.608	0.62	0.392	2.7434e-08
Cellular Component	GO:0033017	11	sarcoplasmic reticulum membrane	0.152938	Q13557	292	0.489	Q1	K	Calcium/calmodulin-dependent protein kinase type II subunit delta OS=Homo sapiens OX=9606 GN=CAMK2D PE=1 SV=3	CAMK2D	1	0.0244498	51.436	QETVDCLK(1)K	3	0.21401	1	1.637	1.358	1.344	0.655	0.756	0.712	0.489	0.00073807
Cellular Component	GO:0031430	12	M band	0.152938	P04075	140	0.462	Q1	K	Fructose-bisphosphate aldolase A OS=Homo sapiens OX=9606 GN=ALDOA PE=1 SV=2	ALDOA	1	0.0246193	73.499	K(1)DGADFAK	3	0.18494	2	1.579	1.444	1.418	0.69	0.684	0.679	0.462	0.00189588
Cellular Component	GO:0031430	12	M band	0.152938	P06733	335	0.433	Q1	K	Alpha-enolase OS=Homo sapiens OX=9606 GN=ENO1 PE=1 SV=2	ENO1	1	9.75047e-11	130.72	AVNEK(1)SCNCLLLK	2	0.29651	6	1.575	1.526	1.454	0.656	0.66	0.657	0.433	0.00077832
Cellular Component	GO:0005832	10	chaperonin-containing T-complex	0.0943353	P40227	287	0.454	Q1	K	T-complex protein 1 subunit zeta OS=Homo sapiens OX=9606 GN=CCT6A PE=1 SV=3	CCT6A	1	1.76708e-06	104.55	VCGDSDK(1)GFVVINQK	3	-0.21642	1	1.491	1.647	1.328	0.635	0.687	0.707	0.454	0.00035906
Cellular Component	GO:0005832	10	chaperonin-containing T-complex	0.0943353	P49368	44	0.396	Q1	K	T-complex protein 1 subunit gamma OS=Homo sapiens OX=9606 GN=CCT3 PE=1 SV=4	CCT3	1	0.00961247	68.515	TCLGPK(1)SMMK	3	-1.6047	3	1.529	1.536	1.644	0.644	0.607	0.613	0.396	3.166e-06
Cellular Component	GO:0005832	10	chaperonin-containing T-complex	0.0943353	P50991	292	0.438	Q1	K	T-complex protein 1 subunit delta OS=Homo sapiens OX=9606 GN=CCT4 PE=1 SV=4	CCT4	1	1.33037e-06	131.06	K(1)TGCNVLLIQK	2	-1.0315	3	1.553	1.521	1.461	0.65	0.647	0.688	0.438	3.2357e-06
Cellular Component	GO:0001772	7	immunological synapse	0.101136	P35579	180	0.355	Q1	K	Myosin-9 OS=Homo sapiens OX=9606 GN=MYH9 PE=1 SV=4	MYH9	1	5.30441e-22	143.04	EDQSILCTGESGAGK(1)TENTK	3	-0.56027	1	1.567	1.76	1.57	0.594	0.577	0.566	0.355	1.72257e-05
Cellular Component	GO:0001772	7	immunological synapse	0.101136	P35579	565	0.403	Q1	K	Myosin-9 OS=Homo sapiens OX=9606 GN=MYH9 PE=1 SV=4	MYH9	1	0.00243053	54.898	DK(1)ADFCIIHYAGK	3	-0.65742	1	1.575	1.478	1.63	0.589	0.674	0.622	0.403	4.3735e-05
Cellular Component	GO:0001772	7	immunological synapse	0.101136	Q8WUM4	234	0.284	Q1	K	Programmed cell death 6-interacting protein OS=Homo sapiens OX=9606 GN=PDCD6IP PE=1 SV=1	PDCD6IP	1	4.05874e-05	122.7	QCQYK(1)DTLPK	2	-2.2661	2	1.797	1.8	1.665	0.489	0.513	0.495	0.284	9.0293e-07
Cellular Component	GO:0005938	9	cell cortex	0.00533732	P21333	578	0.272	Q1	K	Filamin-A OS=Homo sapiens OX=9606 GN=FLNA PE=1 SV=4	FLNA	1	0.000120036	101.56	VGTECGNQK(1)VR	2	-0.21816	1	1.73	1.815	1.784	0.486	0.476	0.485	0.272	6.0056e-08
Cellular Component	GO:0005938	9	cell cortex	0.00533732	P21333	2000	0.359	Q1	K	Filamin-A OS=Homo sapiens OX=9606 GN=FLNA PE=1 SV=4	FLNA	1	0.0408648	66.692	EEPCLLK(1)R	2	-0.50213	1	1.675	1.62	1.586	0.582	0.588	0.583	0.359	1.8799e-07
Cellular Component	GO:0005938	9	cell cortex	0.00533732	P21333	1450	0.495	Q1	K	Filamin-A OS=Homo sapiens OX=9606 GN=FLNA PE=1 SV=4	FLNA	1	0.00011233	90.793	VPVHDVTDASK(1)VK	3	0.48724	1	1.479	1.441	1.393	0.691	0.679	0.764	0.495	6.2437e-05
Cellular Component	GO:0005938	9	cell cortex	0.00533732	Q12797	646	0.392	Q1	K	Aspartyl/asparaginyl beta-hydroxylase OS=Homo sapiens OX=9606 GN=ASPH PE=1 SV=3	ASPH	1	0.000150126	98.942	GAPK(1)TCTLLEK	3	0.49951	2	1.584	1.579	1.567	0.626	0.608	0.62	0.392	2.7434e-08
Cellular Component	GO:0005938	9	cell cortex	0.00533732	P35579	180	0.355	Q1	K	Myosin-9 OS=Homo sapiens OX=9606 GN=MYH9 PE=1 SV=4	MYH9	1	5.30441e-22	143.04	EDQSILCTGESGAGK(1)TENTK	3	-0.56027	1	1.567	1.76	1.57	0.594	0.577	0.566	0.355	1.72257e-05
Cellular Component	GO:0005938	9	cell cortex	0.00533732	P35579	565	0.403	Q1	K	Myosin-9 OS=Homo sapiens OX=9606 GN=MYH9 PE=1 SV=4	MYH9	1	0.00243053	54.898	DK(1)ADFCIIHYAGK	3	-0.65742	1	1.575	1.478	1.63	0.589	0.674	0.622	0.403	4.3735e-05
Cellular Component	GO:0005938	9	cell cortex	0.00533732	P18206	316	0.374	Q1	K	Vinculin OS=Homo sapiens OX=9606 GN=VCL PE=1 SV=4	VCL	1	0.0100094	72.34	VGELCAGK(1)ER	2	-1.6995	1	1.722	1.618	1.478	0.627	0.582	0.593	0.374	3.9318e-05
Cellular Component	GO:0005938	9	cell cortex	0.00533732	Q14155	725	0.484	Q1	K	Rho guanine nucleotide exchange factor 7 OS=Homo sapiens OX=9606 GN=ARHGEF7 PE=1 SV=2	ARHGEF7	1	0.00865446	62.162	VIEAYCTSAK(1)TR	2	1.6091	1	1.645	1.352	1.365	0.703	0.725	0.683	0.484	0.00039998
Cellular Component	GO:0005938	9	cell cortex	0.00533732	P19338	545	0.498	Q1	K	Nucleolin OS=Homo sapiens OX=9606 GN=NCL PE=1 SV=3	NCL	1	4.9615e-05	136.49	EALNSCNK(1)R	3	0.17238	5	1.466	1.461	1.376	0.712	0.722	0.709	0.498	2.6011e-06
Cellular Component	GO:0005938	9	cell cortex	0.00533732	P60981	30	0.396	Q1	K	Destrin OS=Homo sapiens OX=9606 GN=DSTN PE=1 SV=3	DSTN	1	0.00172616	93.096	CSTPEEIK(1)K	3	-1.0849	3	1.589	1.587	1.536	0.613	0.602	0.649	0.396	1.6318e-06
Cellular Component	GO:0005938	9	cell cortex	0.00533732	Q14847	50	0.459	Q1	K	LIM and SH3 domain protein 1 OS=Homo sapiens OX=9606 GN=LASP1 PE=1 SV=2	LASP1	1	0.010633	57.785	K(1)PYCNAHYPK	3	-0.53436	2	1.432	1.49	1.529	0.706	0.675	0.66	0.459	4.5956e-06
Cellular Component	GO:0005938	9	cell cortex	0.00533732	Q14980	73	0.492	Q1	K	Nuclear mitotic apparatus protein 1 OS=Homo sapiens OX=9606 GN=NUMA1 PE=1 SV=2	NUMA1	1	0.000365798	79.652	K(1)HPSSPECLVSAQK	3	-1.1446	1	1.499	1.405	1.421	0.698	0.705	0.725	0.492	3.285e-06
Cellular Component	GO:0005938	9	cell cortex	0.00533732	Q14980	303	0.293	Q1	K	Nuclear mitotic apparatus protein 1 OS=Homo sapiens OX=9606 GN=NUMA1 PE=1 SV=2	NUMA1	1	3.57606e-05	134.13	QCQDLK(1)TEK	2	0.098392	2	1.777	1.74	1.697	0.489	0.495	0.545	0.293	2.4028e-06
Cellular Component	GO:0005938	9	cell cortex	0.00533732	Q9UM54	240	0.316	Q1	K	Unconventional myosin-VI OS=Homo sapiens OX=9606 GN=MYO6 PE=1 SV=4	MYO6	1	0.0165223	70.056	ICVQGK(1)EER	2	-0.27571	1	1.747	1.741	1.607	0.539	0.568	0.505	0.316	1.61137e-05
Cellular Component	GO:0005938	9	cell cortex	0.00533732	Q9UM54	325	0.466	Q1	K	Unconventional myosin-VI OS=Homo sapiens OX=9606 GN=MYO6 PE=1 SV=4	MYO6	1	0.0271518	81.296	MCTAMK(1)K	2	-0.14267	1	1.465	1.483	1.477	0.704	0.711	0.646	0.466	0.00160093
Cellular Component	GO:0005938	9	cell cortex	0.00533732	P43034	360	0.433	Q1	K	Platelet-activating factor acetylhydrolase IB subunit alpha OS=Homo sapiens OX=9606 GN=PAFAH1B1 PE=1 SV=2	PAFAH1B1	1	0.00320332	72.705	FILSCADDK(1)TLR	2	0.75147	1	1.351	1.606	1.584	0.52	0.74	0.704	0.433	0.0023609
Cellular Component	GO:0005938	9	cell cortex	0.00533732	Q9BZF1	723	0.308	Q1	K	Oxysterol-binding protein-related protein 8 OS=Homo sapiens OX=9606 GN=OSBPL8 PE=1 SV=3	OSBPL8	1	0.00193928	91.961	TK(1)NEEWSCK	2	-0.38205	1	1.813	1.677	1.649	0.554	0.493	0.537	0.308	1.66199e-05
Cellular Component	GO:0005938	9	cell cortex	0.00533732	Q16181	208	0.405	Q1	K	Septin-7 OS=Homo sapiens OX=9606 GN=SEPTIN7 PE=1 SV=2	SEPTIN7	1	6.18208e-46	200.19	ADTLTPEECQQFK(1)K	2	0.48685	5	1.584	1.532	1.557	0.624	0.625	0.642	0.405	1.4162e-07
Cellular Component	GO:0000803	9	sex chromosome	0.0657538	O75367	304	0.372	Q1	K	Core histone macro-H2A.1 OS=Homo sapiens OX=9606 GN=H2AFY PE=1 SV=4	H2AFY	1	0.000144859	116.24	NCLALADDK(1)K	2	0.39339	2	1.634	1.692	1.494	0.556	0.613	0.622	0.372	4.0974e-05
Cellular Component	GO:0000803	9	sex chromosome	0.0657538	P84243	37	0.422	Q1	K	Histone H3.3 OS=Homo sapiens OX=9606 GN=H3-3A PE=1 SV=2	H3-3A	1	0.000237623	93.623	K(1)SAPSTGGVK(1)K	2	-0.62162	5	1.579	1.45	1.573	0.637	0.664	0.641	0.422	4.7532e-06
Cellular Component	GO:0000803	9	sex chromosome	0.0657538	A6NHR9	569	0.401	Q1	K	Structural maintenance of chromosomes flexible hinge domain-containing protein 1 OS=Homo sapiens OX=9606 GN=SMCHD1 PE=1 SV=2	SMCHD1	1	0.00714345	72.928	DCHEK(1)YDK	3	3.8917	1	1.61	1.654	1.43	0.645	0.636	0.6	0.401	5.6202e-05
Cellular Component	GO:0030863	11	cortical cytoskeleton	0.14781	P21333	578	0.272	Q1	K	Filamin-A OS=Homo sapiens OX=9606 GN=FLNA PE=1 SV=4	FLNA	1	0.000120036	101.56	VGTECGNQK(1)VR	2	-0.21816	1	1.73	1.815	1.784	0.486	0.476	0.485	0.272	6.0056e-08
Cellular Component	GO:0030863	11	cortical cytoskeleton	0.14781	P21333	2000	0.359	Q1	K	Filamin-A OS=Homo sapiens OX=9606 GN=FLNA PE=1 SV=4	FLNA	1	0.0408648	66.692	EEPCLLK(1)R	2	-0.50213	1	1.675	1.62	1.586	0.582	0.588	0.583	0.359	1.8799e-07
Cellular Component	GO:0030863	11	cortical cytoskeleton	0.14781	P21333	1450	0.495	Q1	K	Filamin-A OS=Homo sapiens OX=9606 GN=FLNA PE=1 SV=4	FLNA	1	0.00011233	90.793	VPVHDVTDASK(1)VK	3	0.48724	1	1.479	1.441	1.393	0.691	0.679	0.764	0.495	6.2437e-05
Cellular Component	GO:0030863	11	cortical cytoskeleton	0.14781	P60981	30	0.396	Q1	K	Destrin OS=Homo sapiens OX=9606 GN=DSTN PE=1 SV=3	DSTN	1	0.00172616	93.096	CSTPEEIK(1)K	3	-1.0849	3	1.589	1.587	1.536	0.613	0.602	0.649	0.396	1.6318e-06
Cellular Component	GO:0030863	11	cortical cytoskeleton	0.14781	Q14847	50	0.459	Q1	K	LIM and SH3 domain protein 1 OS=Homo sapiens OX=9606 GN=LASP1 PE=1 SV=2	LASP1	1	0.010633	57.785	K(1)PYCNAHYPK	3	-0.53436	2	1.432	1.49	1.529	0.706	0.675	0.66	0.459	4.5956e-06
Cellular Component	GO:0030863	11	cortical cytoskeleton	0.14781	P35579	180	0.355	Q1	K	Myosin-9 OS=Homo sapiens OX=9606 GN=MYH9 PE=1 SV=4	MYH9	1	5.30441e-22	143.04	EDQSILCTGESGAGK(1)TENTK	3	-0.56027	1	1.567	1.76	1.57	0.594	0.577	0.566	0.355	1.72257e-05
Cellular Component	GO:0030863	11	cortical cytoskeleton	0.14781	P35579	565	0.403	Q1	K	Myosin-9 OS=Homo sapiens OX=9606 GN=MYH9 PE=1 SV=4	MYH9	1	0.00243053	54.898	DK(1)ADFCIIHYAGK	3	-0.65742	1	1.575	1.478	1.63	0.589	0.674	0.622	0.403	4.3735e-05
Cellular Component	GO:0030863	11	cortical cytoskeleton	0.14781	P18206	316	0.374	Q1	K	Vinculin OS=Homo sapiens OX=9606 GN=VCL PE=1 SV=4	VCL	1	0.0100094	72.34	VGELCAGK(1)ER	2	-1.6995	1	1.722	1.618	1.478	0.627	0.582	0.593	0.374	3.9318e-05
Cellular Component	GO:0030663	12	COPI-coated vesicle membrane	0.208434	P53621	750	0.374	Q1	K	Coatomer subunit alpha OS=Homo sapiens OX=9606 GN=COPA PE=1 SV=2	COPA	1	0.00254514	113.26	ILK(1)NCGQK	2	-0.065422	1	1.6	1.63	1.578	0.601	0.573	0.625	0.374	1.6491e-06
Cellular Component	GO:0030663	12	COPI-coated vesicle membrane	0.208434	P48444	476	0.346	Q1	K	Coatomer subunit delta OS=Homo sapiens OX=9606 GN=ARCN1 PE=1 SV=1	ARCN1	1	1.67965e-14	164.04	K(1)NYCNIQVTK	2	-1.1886	4	1.646	1.641	1.654	0.588	0.583	0.541	0.346	0.00062328
Cellular Component	GO:0005642	6	annulate lamellae	0.0558099	O14980	103	0.351	Q1	K	Exportin-1 OS=Homo sapiens OX=9606 GN=XPO1 PE=1 SV=1	XPO1	1	0.00322946	107.79	NQCEGIK(1)K	3	-2.6199	2	1.685	1.659	1.58	0.601	0.573	0.553	0.351	2.2658e-06
Cellular Component	GO:0005642	6	annulate lamellae	0.0558099	O14980	122	0.347	Q1	K	Exportin-1 OS=Homo sapiens OX=9606 GN=XPO1 PE=1 SV=1	XPO1	1	2.0108e-07	125.53	TSSDPTCVEK(1)EK	3	-1.7379	2	1.706	1.593	1.643	0.587	0.569	0.558	0.347	8.8605e-07
Cellular Component	GO:0005642	6	annulate lamellae	0.0558099	P49792	1332	0.254	Q1	K	E3 SUMO-protein ligase RanBP2 OS=Homo sapiens OX=9606 GN=RANBP2 PE=1 SV=2	RANBP2	1	0.00029099	85.554	EPTSHDNK(1)DICK	3	-1.5358	1	1.751	1.825	1.852	0.407	0.466	0.503	0.254	2.3978e-05
Cellular Component	GO:0005642	6	annulate lamellae	0.0558099	P49792	2581	0.143	Q1	K	E3 SUMO-protein ligase RanBP2 OS=Homo sapiens OX=9606 GN=RANBP2 PE=1 SV=2	RANBP2	0.995422	1.20345e-09	117.65	K(0.005)CELSK(0.995)NSDIEQSSDSK	3	-0.64278	1	2.129	2.071	1.971	0.279	0.301	0.304	0.143	3.2447e-07
Cellular Component	GO:0005642	6	annulate lamellae	0.0558099	P49792	2138	0.256	Q1	K	E3 SUMO-protein ligase RanBP2 OS=Homo sapiens OX=9606 GN=RANBP2 PE=1 SV=2	RANBP2	1	0.00316207	107.21	QK(1)FEECQR	2	0.11464	1	1.752	1.82	1.844	0.454	0.437	0.496	0.256	2.3285e-06
Cellular Component	GO:0005642	6	annulate lamellae	0.0558099	P49792	3034	0.452	Q1	K	E3 SUMO-protein ligase RanBP2 OS=Homo sapiens OX=9606 GN=RANBP2 PE=1 SV=2	RANBP2	1	0.00441888	101.65	EVADCFK(1)K	2	-0.79272	1	1.454	1.469	1.548	0.634	0.709	0.679	0.452	3.5313e-05
Cellular Component	GO:0005884	11	actin filament	0.219261	P21333	578	0.272	Q1	K	Filamin-A OS=Homo sapiens OX=9606 GN=FLNA PE=1 SV=4	FLNA	1	0.000120036	101.56	VGTECGNQK(1)VR	2	-0.21816	1	1.73	1.815	1.784	0.486	0.476	0.485	0.272	6.0056e-08
Cellular Component	GO:0005884	11	actin filament	0.219261	P21333	2000	0.359	Q1	K	Filamin-A OS=Homo sapiens OX=9606 GN=FLNA PE=1 SV=4	FLNA	1	0.0408648	66.692	EEPCLLK(1)R	2	-0.50213	1	1.675	1.62	1.586	0.582	0.588	0.583	0.359	1.8799e-07
Cellular Component	GO:0005884	11	actin filament	0.219261	P21333	1450	0.495	Q1	K	Filamin-A OS=Homo sapiens OX=9606 GN=FLNA PE=1 SV=4	FLNA	1	0.00011233	90.793	VPVHDVTDASK(1)VK	3	0.48724	1	1.479	1.441	1.393	0.691	0.679	0.764	0.495	6.2437e-05
Cellular Component	GO:0005884	11	actin filament	0.219261	P47756	57	0.424	Q1	K	F-actin-capping protein subunit beta OS=Homo sapiens OX=9606 GN=CAPZB PE=1 SV=4	CAPZB	1	9.4043e-13	133.47	VVGK(1)DYLLCDYNR	3	-1.9206	2	1.509	1.551	1.529	0.644	0.679	0.623	0.424	2.622e-06
Cellular Component	GO:0005884	11	actin filament	0.219261	Q9UM54	240	0.316	Q1	K	Unconventional myosin-VI OS=Homo sapiens OX=9606 GN=MYO6 PE=1 SV=4	MYO6	1	0.0165223	70.056	ICVQGK(1)EER	2	-0.27571	1	1.747	1.741	1.607	0.539	0.568	0.505	0.316	1.61137e-05
Cellular Component	GO:0005884	11	actin filament	0.219261	Q9UM54	325	0.466	Q1	K	Unconventional myosin-VI OS=Homo sapiens OX=9606 GN=MYO6 PE=1 SV=4	MYO6	1	0.0271518	81.296	MCTAMK(1)K	2	-0.14267	1	1.465	1.483	1.477	0.704	0.711	0.646	0.466	0.00160093
Cellular Component	GO:0005884	11	actin filament	0.219261	P13797	459	0.258	Q1	K	Plastin-3 OS=Homo sapiens OX=9606 GN=PLS3 PE=1 SV=4	PLS3	1	1.38021e-14	145.69	K(1)LENCNYAVELGK	2	1.0384	1	1.869	1.775	1.767	0.46	0.467	0.471	0.258	1.2353e-07
Cellular Component	GO:0031594	3	neuromuscular junction	0.322564	P35579	180	0.355	Q1	K	Myosin-9 OS=Homo sapiens OX=9606 GN=MYH9 PE=1 SV=4	MYH9	1	5.30441e-22	143.04	EDQSILCTGESGAGK(1)TENTK	3	-0.56027	1	1.567	1.76	1.57	0.594	0.577	0.566	0.355	1.72257e-05
Cellular Component	GO:0031594	3	neuromuscular junction	0.322564	P35579	565	0.403	Q1	K	Myosin-9 OS=Homo sapiens OX=9606 GN=MYH9 PE=1 SV=4	MYH9	1	0.00243053	54.898	DK(1)ADFCIIHYAGK	3	-0.65742	1	1.575	1.478	1.63	0.589	0.674	0.622	0.403	4.3735e-05
Cellular Component	GO:0031594	3	neuromuscular junction	0.322564	P10644	367	0.327	Q1	K	cAMP-dependent protein kinase type I-alpha regulatory subunit OS=Homo sapiens OX=9606 GN=PRKAR1A PE=1 SV=1	PRKAR1A	1	6.36671e-05	106.67	VLGPCSDILK(1)R	2	-0.67679	1	1.637	1.64	1.76	0.573	0.538	0.536	0.327	2.0587e-06
Cellular Component	GO:0032541	12	cortical endoplasmic reticulum	0.0205593	Q12797	646	0.392	Q1	K	Aspartyl/asparaginyl beta-hydroxylase OS=Homo sapiens OX=9606 GN=ASPH PE=1 SV=3	ASPH	1	0.000150126	98.942	GAPK(1)TCTLLEK	3	0.49951	2	1.584	1.579	1.567	0.626	0.608	0.62	0.392	2.7434e-08
Cellular Component	GO:0032541	12	cortical endoplasmic reticulum	0.0205593	Q9BZF1	723	0.308	Q1	K	Oxysterol-binding protein-related protein 8 OS=Homo sapiens OX=9606 GN=OSBPL8 PE=1 SV=3	OSBPL8	1	0.00193928	91.961	TK(1)NEEWSCK	2	-0.38205	1	1.813	1.677	1.649	0.554	0.493	0.537	0.308	1.66199e-05
Cellular Component	GO:0043296	4	apical junction complex	0.172585	Q9P0L0	52	0.307	Q1	K	Vesicle-associated membrane protein-associated protein A OS=Homo sapiens OX=9606 GN=VAPA PE=1 SV=3	VAPA	1	0.0183623	88.819	VK(1)TTAPR	2	0.92096	1	1.883	1.543	1.719	0.5	0.456	0.622	0.307	0.0003986
Cellular Component	GO:0043296	4	apical junction complex	0.172585	Q92797	684	0.342	Q1	K	Symplekin OS=Homo sapiens OX=9606 GN=SYMPK PE=1 SV=2	SYMPK	1	0.0226227	76.282	K(1)YCEDESR	2	0.04773	1	1.777	1.569	1.621	0.525	0.593	0.579	0.342	3.7122e-05
Cellular Component	GO:0043296	4	apical junction complex	0.172585	O60716	448	0.494	Q1	K	Catenin delta-1 OS=Homo sapiens OX=9606 GN=CTNND1 PE=1 SV=1	CTNND1	1	1.1653e-10	125.47	IAIK(1)NCDGVPALVR	3	1.9491	2	1.454	1.467	1.396	0.71	0.723	0.699	0.494	1.3007e-06
Cellular Component	GO:0043296	4	apical junction complex	0.172585	O60716	846	0.494	Q1	K	Catenin delta-1 OS=Homo sapiens OX=9606 GN=CTNND1 PE=1 SV=1	CTNND1	1	0.000757674	89.507	K(1)SDFQVNLNNASR	2	4.4664	1	1.431	1.414	1.468	0.7	0.699	0.732	0.494	1.4922e-06
Cellular Component	GO:0043296	4	apical junction complex	0.172585	P18206	316	0.374	Q1	K	Vinculin OS=Homo sapiens OX=9606 GN=VCL PE=1 SV=4	VCL	1	0.0100094	72.34	VGELCAGK(1)ER	2	-1.6995	1	1.722	1.618	1.478	0.627	0.582	0.593	0.374	3.9318e-05
Cellular Component	GO:0043296	4	apical junction complex	0.172585	P35221	120	0.488	Q1	K	Catenin alpha-1 OS=Homo sapiens OX=9606 GN=CTNNA1 PE=1 SV=1	CTNNA1	1	5.50199e-08	107.82	AAAGEFADDPCSSVK(1)R	2	-0.12176	1	1.365	1.42	1.547	0.7	0.659	0.755	0.488	0.000182432
Cellular Component	GO:0005876	12	spindle microtubule	0.378437	Q14980	73	0.492	Q1	K	Nuclear mitotic apparatus protein 1 OS=Homo sapiens OX=9606 GN=NUMA1 PE=1 SV=2	NUMA1	1	0.000365798	79.652	K(1)HPSSPECLVSAQK	3	-1.1446	1	1.499	1.405	1.421	0.698	0.705	0.725	0.492	3.285e-06
Cellular Component	GO:0005876	12	spindle microtubule	0.378437	Q14980	303	0.293	Q1	K	Nuclear mitotic apparatus protein 1 OS=Homo sapiens OX=9606 GN=NUMA1 PE=1 SV=2	NUMA1	1	3.57606e-05	134.13	QCQDLK(1)TEK	2	0.098392	2	1.777	1.74	1.697	0.489	0.495	0.545	0.293	2.4028e-06
Cellular Component	GO:0005876	12	spindle microtubule	0.378437	P43034	360	0.433	Q1	K	Platelet-activating factor acetylhydrolase IB subunit alpha OS=Homo sapiens OX=9606 GN=PAFAH1B1 PE=1 SV=2	PAFAH1B1	1	0.00320332	72.705	FILSCADDK(1)TLR	2	0.75147	1	1.351	1.606	1.584	0.52	0.74	0.704	0.433	0.0023609
Cellular Component	GO:0000346	10	transcription export complex	0.101136	Q8NI27	1156	0.16	Q1	K	THO complex subunit 2 OS=Homo sapiens OX=9606 GN=THOC2 PE=1 SV=2	THOC2	1	0.0045753	99.973	ICQEEK(1)EK	3	-1.0392	2	2.091	1.986	1.971	0.322	0.323	0.325	0.16	0.000102576
Cellular Component	GO:0000346	10	transcription export complex	0.101136	Q13838	162	0.422	Q1	K	Spliceosome RNA helicase DDX39B OS=Homo sapiens OX=9606 GN=DDX39B PE=1 SV=1	DDX39B	1	0.0197688	89.827	KDEEVLK(1)K	2	-0.64126	3	1.559	1.602	1.441	0.667	0.628	0.647	0.422	1.92273e-05
Cellular Component	GO:0000346	10	transcription export complex	0.101136	Q13838	241	0.44	Q1	K	Spliceosome RNA helicase DDX39B OS=Homo sapiens OX=9606 GN=DDX39B PE=1 SV=1	DDX39B	1	2.52188e-06	104.2	K(1)FMQDPMEIFVDDETK	3	0.192	1	1.517	1.49	1.519	0.687	0.659	0.647	0.44	8.2451e-07
Molecular Function	GO:0008083	5	growth factor activity	0.155835	P51858	105	0.37	Q1	K	Hepatoma-derived growth factor OS=Homo sapiens OX=9606 GN=HDGF PE=1 SV=1	HDGF	1	0.000328002	108.72	ASGYQSSQK(1)K	2	-0.048569	1	1.627	1.541	1.66	0.603	0.589	0.595	0.37	8.9457e-07
Molecular Function	GO:0008083	5	growth factor activity	0.155835	P55145	120	0.357	Q1	K	Mesencephalic astrocyte-derived neurotrophic factor OS=Homo sapiens OX=9606 GN=MANF PE=1 SV=3	MANF	1	9.46326e-05	103.76	DSQICELK(1)YDK	2	-0.80673	3	1.641	1.62	1.63	0.591	0.577	0.579	0.357	1.3006e-08
Molecular Function	GO:0042562	3	hormone binding	0.384037	P60468	35	0.189	Q1	K	Protein transport protein Sec61 subunit beta OS=Homo sapiens OX=9606 GN=SEC61B PE=1 SV=2	SEC61B	1	0.00214134	118.04	K(1)NASCGTR	2	-0.85995	1	1.927	2.044	1.877	0.404	0.373	0.327	0.189	1.75036e-05
Molecular Function	GO:0042562	3	hormone binding	0.384037	P47895	48	0.492	Q1	K	Aldehyde dehydrogenase family 1 member A3 OS=Homo sapiens OX=9606 GN=ALDH1A3 PE=1 SV=2	ALDH1A3	1	0.00157174	86.911	K(1)FATCNPSTR	2	-0.43183	1	1.53	1.442	1.355	0.742	0.696	0.693	0.492	6.4523e-05
Molecular Function	GO:0003756	6	protein disulfide isomerase activity	0.269966	P30101	94	0.42	Q1	K	Protein disulfide-isomerase A3 OS=Homo sapiens OX=9606 GN=PDIA3 PE=1 SV=4	PDIA3	1	3.5914e-41	161.47	VDCTANTNTCNK(1)YGVSGYPTLK	4	-0.65929	5	1.559	1.492	1.558	0.681	0.625	0.63	0.42	4.8366e-06
Molecular Function	GO:0003756	6	protein disulfide isomerase activity	0.269966	P30101	415	0.45	Q1	K	Protein disulfide-isomerase A3 OS=Homo sapiens OX=9606 GN=PDIA3 PE=1 SV=4	PDIA3	1	0.0215894	85.676	NLEPK(1)YK	3	0.15336	4	1.566	1.535	1.386	0.673	0.669	0.679	0.45	0.0022784
Molecular Function	GO:0003756	6	protein disulfide isomerase activity	0.269966	P30101	82	0.469	Q1	K	Protein disulfide-isomerase A3 OS=Homo sapiens OX=9606 GN=PDIA3 PE=1 SV=4	PDIA3	1	6.15521e-11	117.18	GIVPLAK(1)VDCTANTNTCNK	3	-0.14257	4	1.365	1.513	1.526	0.693	0.669	0.704	0.469	4.061e-05
Molecular Function	GO:0003756	6	protein disulfide isomerase activity	0.269966	P07237	308	0.278	Q1	K	Protein disulfide-isomerase OS=Homo sapiens OX=9606 GN=P4HB PE=1 SV=3	P4HB	1	0.00332344	86.898	ILEFFGLK(1)K	3	-0.031928	2	1.755	1.698	1.841	0.452	0.513	0.506	0.278	1.51387e-05
Molecular Function	GO:0003756	6	protein disulfide isomerase activity	0.269966	P07237	309	0.424	Q1	K	Protein disulfide-isomerase OS=Homo sapiens OX=9606 GN=P4HB PE=1 SV=3	P4HB	1	0.00170122	121.64	K(1)EECPAVR	3	0.4143	2	1.6	1.521	1.471	0.613	0.641	0.691	0.424	3.7866e-05
Molecular Function	GO:0044183	4	protein binding involved in protein folding	0.133267	P40227	287	0.454	Q1	K	T-complex protein 1 subunit zeta OS=Homo sapiens OX=9606 GN=CCT6A PE=1 SV=3	CCT6A	1	1.76708e-06	104.55	VCGDSDK(1)GFVVINQK	3	-0.21642	1	1.491	1.647	1.328	0.635	0.687	0.707	0.454	0.00035906
Molecular Function	GO:0044183	4	protein binding involved in protein folding	0.133267	P49368	44	0.396	Q1	K	T-complex protein 1 subunit gamma OS=Homo sapiens OX=9606 GN=CCT3 PE=1 SV=4	CCT3	1	0.00961247	68.515	TCLGPK(1)SMMK	3	-1.6047	3	1.529	1.536	1.644	0.644	0.607	0.613	0.396	3.166e-06
Molecular Function	GO:0044183	4	protein binding involved in protein folding	0.133267	P50991	292	0.438	Q1	K	T-complex protein 1 subunit delta OS=Homo sapiens OX=9606 GN=CCT4 PE=1 SV=4	CCT4	1	1.33037e-06	131.06	K(1)TGCNVLLIQK	2	-1.0315	3	1.553	1.521	1.461	0.65	0.647	0.688	0.438	3.2357e-06
Molecular Function	GO:0044183	4	protein binding involved in protein folding	0.133267	Q9BQS8	1019	0.497	Q1	K	FYVE and coiled-coil domain-containing protein 1 OS=Homo sapiens OX=9606 GN=FYCO1 PE=1 SV=3	FYCO1	1	0.0318989	61.344	LK(1)NAGEECK	2	0.19512	1	1.402	1.445	1.456	0.691	0.699	0.748	0.497	1.6862e-05
Molecular Function	GO:0005216	7	ion channel activity	0.327653	O00299	166	0.49	Q1	K	Chloride intracellular channel protein 1 OS=Homo sapiens OX=9606 GN=CLIC1 PE=1 SV=4	CLIC1	1	3.02602e-14	127.32	K(1)FLDGNELTLADCNLLPK	3	0.41049	1	1.504	1.463	1.365	0.706	0.645	0.77	0.49	0.00025982
Molecular Function	GO:0005216	7	ion channel activity	0.327653	Q14573	258	0.471	Q1	K	Inositol 1,4,5-trisphosphate receptor type 3 OS=Homo sapiens OX=9606 GN=ITPR3 PE=1 SV=2	ITPR3	1	0.000333363	105.13	FLTCDEYK(1)GK	2	-1.2035	2	1.529	1.425	1.454	0.707	0.674	0.693	0.471	3.6728e-06
Molecular Function	GO:0008603	6	cAMP-dependent protein kinase regulator activity	0.0210207	P10644	367	0.327	Q1	K	cAMP-dependent protein kinase type I-alpha regulatory subunit OS=Homo sapiens OX=9606 GN=PRKAR1A PE=1 SV=1	PRKAR1A	1	6.36671e-05	106.67	VLGPCSDILK(1)R	2	-0.67679	1	1.637	1.64	1.76	0.573	0.538	0.536	0.327	2.0587e-06
Molecular Function	GO:0008603	6	cAMP-dependent protein kinase regulator activity	0.0210207	P13861	379	0.477	Q1	K	cAMP-dependent protein kinase type II-alpha regulatory subunit OS=Homo sapiens OX=9606 GN=PRKAR2A PE=1 SV=2	PRKAR2A	1	0.00222902	71.03	LLGPCMDIMK(1)R	3	-0.51879	2	1.403	1.491	1.483	0.719	0.659	0.711	0.477	2.2538e-05
Molecular Function	GO:0051020	5	GTPase binding	0.0770695	P21333	578	0.272	Q1	K	Filamin-A OS=Homo sapiens OX=9606 GN=FLNA PE=1 SV=4	FLNA	1	0.000120036	101.56	VGTECGNQK(1)VR	2	-0.21816	1	1.73	1.815	1.784	0.486	0.476	0.485	0.272	6.0056e-08
Molecular Function	GO:0051020	5	GTPase binding	0.0770695	P21333	2000	0.359	Q1	K	Filamin-A OS=Homo sapiens OX=9606 GN=FLNA PE=1 SV=4	FLNA	1	0.0408648	66.692	EEPCLLK(1)R	2	-0.50213	1	1.675	1.62	1.586	0.582	0.588	0.583	0.359	1.8799e-07
Molecular Function	GO:0051020	5	GTPase binding	0.0770695	P21333	1450	0.495	Q1	K	Filamin-A OS=Homo sapiens OX=9606 GN=FLNA PE=1 SV=4	FLNA	1	0.00011233	90.793	VPVHDVTDASK(1)VK	3	0.48724	1	1.479	1.441	1.393	0.691	0.679	0.764	0.495	6.2437e-05
Molecular Function	GO:0051020	5	GTPase binding	0.0770695	Q9HAV4	41	0.321	Q1	K	Exportin-5 OS=Homo sapiens OX=9606 GN=XPO5 PE=1 SV=1	XPO5	1	0.00432488	85.355	FCEEFK(1)EK	3	-0.12728	2	1.76	1.666	1.642	0.532	0.523	0.574	0.321	2.8685e-06
Molecular Function	GO:0051020	5	GTPase binding	0.0770695	O14980	103	0.351	Q1	K	Exportin-1 OS=Homo sapiens OX=9606 GN=XPO1 PE=1 SV=1	XPO1	1	0.00322946	107.79	NQCEGIK(1)K	3	-2.6199	2	1.685	1.659	1.58	0.601	0.573	0.553	0.351	2.2658e-06
Molecular Function	GO:0051020	5	GTPase binding	0.0770695	O14980	122	0.347	Q1	K	Exportin-1 OS=Homo sapiens OX=9606 GN=XPO1 PE=1 SV=1	XPO1	1	2.0108e-07	125.53	TSSDPTCVEK(1)EK	3	-1.7379	2	1.706	1.593	1.643	0.587	0.569	0.558	0.347	8.8605e-07
Molecular Function	GO:0051020	5	GTPase binding	0.0770695	Q9ULV4	194	0.308	Q1	K	Coronin-1C OS=Homo sapiens OX=9606 GN=CORO1C PE=1 SV=1	CORO1C	1	0.00320052	69.261	NGSLICTASK(1)DK	2	1.4005	2	1.663	1.722	1.748	0.55	0.503	0.528	0.308	1.2137e-06
Molecular Function	GO:0051020	5	GTPase binding	0.0770695	Q13576	553	0.379	Q1	K	Ras GTPase-activating-like protein IQGAP2 OS=Homo sapiens OX=9606 GN=IQGAP2 PE=1 SV=4	IQGAP2	1	0.00516444	78.324	K(1)SSDILSVLK	2	-0.62996	1	1.562	1.607	1.618	0.612	0.547	0.655	0.379	5.7146e-05
Molecular Function	GO:0051020	5	GTPase binding	0.0770695	Q13576	273	0.384	Q1	K	Ras GTPase-activating-like protein IQGAP2 OS=Homo sapiens OX=9606 GN=IQGAP2 PE=1 SV=4	IQGAP2	1	0.00160054	85.163	LK(1)NSCISEEER	2	-0.32659	1	1.651	1.654	1.463	0.624	0.568	0.638	0.384	5.9778e-05
Molecular Function	GO:0051020	5	GTPase binding	0.0770695	Q13576	1454	0.478	Q1	K	Ras GTPase-activating-like protein IQGAP2 OS=Homo sapiens OX=9606 GN=IQGAP2 PE=1 SV=4	IQGAP2	1	0.0105865	86.882	TCLDNLK(1)R	2	-0.99215	1	1.5	1.459	1.416	0.707	0.68	0.706	0.478	1.9511e-06
Molecular Function	GO:0051020	5	GTPase binding	0.0770695	Q7L576	516	0.465	Q1	K	Cytoplasmic FMR1-interacting protein 1 OS=Homo sapiens OX=9606 GN=CYFIP1 PE=1 SV=1	CYFIP1	1	2.47216e-06	84.107	K(1)TVCDWETGHEPFNDPALR	3	0.46049	1	1.526	1.529	1.372	0.613	0.778	0.666	0.465	0.00060253
Molecular Function	GO:0051020	5	GTPase binding	0.0770695	P50395	418	0.372	Q1	K	Rab GDP dissociation inhibitor beta OS=Homo sapiens OX=9606 GN=GDI2 PE=1 SV=2	GDI2	1	7.11675e-30	154.74	TYDATTHFETTCDDIK(1)NIYK	3	-0.58508	2	1.621	1.595	1.605	0.615	0.593	0.585	0.372	1.8781e-07
Molecular Function	GO:0051020	5	GTPase binding	0.0770695	P50395	288	0.485	Q1	K	Rab GDP dissociation inhibitor beta OS=Homo sapiens OX=9606 GN=GDI2 PE=1 SV=2	GDI2	1	3.45481e-10	142.1	QLICDPSYVK(1)DR	2	0.035798	3	1.362	1.493	1.492	0.71	0.717	0.68	0.485	3.5397e-05
Molecular Function	GO:0051020	5	GTPase binding	0.0770695	P49792	1332	0.254	Q1	K	E3 SUMO-protein ligase RanBP2 OS=Homo sapiens OX=9606 GN=RANBP2 PE=1 SV=2	RANBP2	1	0.00029099	85.554	EPTSHDNK(1)DICK	3	-1.5358	1	1.751	1.825	1.852	0.407	0.466	0.503	0.254	2.3978e-05
Molecular Function	GO:0051020	5	GTPase binding	0.0770695	P49792	2581	0.143	Q1	K	E3 SUMO-protein ligase RanBP2 OS=Homo sapiens OX=9606 GN=RANBP2 PE=1 SV=2	RANBP2	0.995422	1.20345e-09	117.65	K(0.005)CELSK(0.995)NSDIEQSSDSK	3	-0.64278	1	2.129	2.071	1.971	0.279	0.301	0.304	0.143	3.2447e-07
Molecular Function	GO:0051020	5	GTPase binding	0.0770695	P49792	2138	0.256	Q1	K	E3 SUMO-protein ligase RanBP2 OS=Homo sapiens OX=9606 GN=RANBP2 PE=1 SV=2	RANBP2	1	0.00316207	107.21	QK(1)FEECQR	2	0.11464	1	1.752	1.82	1.844	0.454	0.437	0.496	0.256	2.3285e-06
Molecular Function	GO:0051020	5	GTPase binding	0.0770695	P49792	3034	0.452	Q1	K	E3 SUMO-protein ligase RanBP2 OS=Homo sapiens OX=9606 GN=RANBP2 PE=1 SV=2	RANBP2	1	0.00441888	101.65	EVADCFK(1)K	2	-0.79272	1	1.454	1.469	1.548	0.634	0.709	0.679	0.452	3.5313e-05
Molecular Function	GO:0051020	5	GTPase binding	0.0770695	P43487	154	0.361	Q1	K	Ran-specific GTPase-activating protein OS=Homo sapiens OX=9606 GN=RANBP1 PE=1 SV=1	RANBP1	1	0.0233636	83.948	TK(1)FEECR	2	-0.64741	1	1.725	1.586	1.563	0.591	0.591	0.579	0.361	2.7355e-06
Molecular Function	GO:0051020	5	GTPase binding	0.0770695	P06733	335	0.433	Q1	K	Alpha-enolase OS=Homo sapiens OX=9606 GN=ENO1 PE=1 SV=2	ENO1	1	9.75047e-11	130.72	AVNEK(1)SCNCLLLK	2	0.29651	6	1.575	1.526	1.454	0.656	0.66	0.657	0.433	0.00077832
Molecular Function	GO:0051020	5	GTPase binding	0.0770695	P07900	576	0.235	Q1	K	Heat shock protein HSP 90-alpha OS=Homo sapiens OX=9606 GN=HSP90AA1 PE=1 SV=5	HSP90AA1	1	0.00316475	93.096	IMK(1)DILEK	3	0.51489	4	1.881	1.876	1.791	0.418	0.456	0.43	0.235	5.6281e-07
Molecular Function	GO:0019787	4	ubiquitin-like protein transferase activity	0.0226617	Q63HN8	2628	0.479	Q1	K	E3 ubiquitin-protein ligase RNF213 OS=Homo sapiens OX=9606 GN=RNF213 PE=1 SV=3	RNF213	1	6.62398e-05	103.66	K(1)TEDECSFVSLR	2	0.3945	1	1.498	1.402	1.474	0.703	0.674	0.717	0.479	1.53871e-05
Molecular Function	GO:0019787	4	ubiquitin-like protein transferase activity	0.0226617	Q63HN8	316	0.377	Q1	K	E3 ubiquitin-protein ligase RNF213 OS=Homo sapiens OX=9606 GN=RNF213 PE=1 SV=3	RNF213	1	0.000318715	87.641	THCQEAETK(1)TK	3	-0.3052	1	1.645	1.616	1.542	0.682	0.587	0.544	0.377	0.000142483
Molecular Function	GO:0019787	4	ubiquitin-like protein transferase activity	0.0226617	P68036	20	0.375	Q1	K	Ubiquitin-conjugating enzyme E2 L3 OS=Homo sapiens OX=9606 GN=UBE2L3 PE=1 SV=1	UBE2L3	1	0.0424799	74.415	CGMK(1)NFR	2	-0.87016	1	1.738	1.37	1.709	0.653	0.547	0.604	0.375	0.00044276
Molecular Function	GO:0019787	4	ubiquitin-like protein transferase activity	0.0226617	Q13404	74	0.415	Q1	K	Ubiquitin-conjugating enzyme E2 variant 1 OS=Homo sapiens OX=9606 GN=UBE2V1 PE=1 SV=2	UBE2V1	1	9.06432e-22	150.39	IECGPK(1)YPEAPPFVR	2	0.05563	2	1.479	1.531	1.616	0.639	0.633	0.647	0.415	2.4772e-06
Molecular Function	GO:0019787	4	ubiquitin-like protein transferase activity	0.0226617	Q13404	68	0.374	Q1	K	Ubiquitin-conjugating enzyme E2 variant 1 OS=Homo sapiens OX=9606 GN=UBE2V1 PE=1 SV=2	UBE2V1	1	1.94405e-08	143.42	IYSLK(1)IECGPK	2	-0.073126	2	1.601	1.602	1.612	0.636	0.601	0.562	0.374	0.00131879
Molecular Function	GO:0019787	4	ubiquitin-like protein transferase activity	0.0226617	P61081	92	0.443	Q1	K	NEDD8-conjugating enzyme Ubc12 OS=Homo sapiens OX=9606 GN=UBE2M PE=1 SV=1	UBE2M	1	0.0125703	45.28	VGQGYPHDPPK(1)VK	3	-1.5166	1	1.398	1.559	1.553	0.704	0.716	0.58	0.443	0.00043764
Molecular Function	GO:0019787	4	ubiquitin-like protein transferase activity	0.0226617	P49792	1332	0.254	Q1	K	E3 SUMO-protein ligase RanBP2 OS=Homo sapiens OX=9606 GN=RANBP2 PE=1 SV=2	RANBP2	1	0.00029099	85.554	EPTSHDNK(1)DICK	3	-1.5358	1	1.751	1.825	1.852	0.407	0.466	0.503	0.254	2.3978e-05
Molecular Function	GO:0019787	4	ubiquitin-like protein transferase activity	0.0226617	P49792	2581	0.143	Q1	K	E3 SUMO-protein ligase RanBP2 OS=Homo sapiens OX=9606 GN=RANBP2 PE=1 SV=2	RANBP2	0.995422	1.20345e-09	117.65	K(0.005)CELSK(0.995)NSDIEQSSDSK	3	-0.64278	1	2.129	2.071	1.971	0.279	0.301	0.304	0.143	3.2447e-07
Molecular Function	GO:0019787	4	ubiquitin-like protein transferase activity	0.0226617	P49792	2138	0.256	Q1	K	E3 SUMO-protein ligase RanBP2 OS=Homo sapiens OX=9606 GN=RANBP2 PE=1 SV=2	RANBP2	1	0.00316207	107.21	QK(1)FEECQR	2	0.11464	1	1.752	1.82	1.844	0.454	0.437	0.496	0.256	2.3285e-06
Molecular Function	GO:0019787	4	ubiquitin-like protein transferase activity	0.0226617	P49792	3034	0.452	Q1	K	E3 SUMO-protein ligase RanBP2 OS=Homo sapiens OX=9606 GN=RANBP2 PE=1 SV=2	RANBP2	1	0.00441888	101.65	EVADCFK(1)K	2	-0.79272	1	1.454	1.469	1.548	0.634	0.709	0.679	0.452	3.5313e-05
Molecular Function	GO:0019787	4	ubiquitin-like protein transferase activity	0.0226617	Q9Y3C8	162	0.346	Q1	K	Ubiquitin-fold modifier-conjugating enzyme 1 OS=Homo sapiens OX=9606 GN=UFC1 PE=1 SV=3	UFC1	1	0.00473733	78.516	GVIQHK(1)EK	3	2.2087	1	1.706	1.69	1.547	0.555	0.547	0.609	0.346	2.0328e-05
Molecular Function	GO:0019787	4	ubiquitin-like protein transferase activity	0.0226617	Q9NT62	185	0.432	Q1	K	Ubiquitin-like-conjugating enzyme ATG3 OS=Homo sapiens OX=9606 GN=ATG3 PE=1 SV=1	ATG3	1	1.2016e-27	167.41	AK(1)TDAGGEDAILQTR	2	0.5084	2	1.529	1.524	1.503	0.63	0.665	0.674	0.432	1.2368e-06
Molecular Function	GO:0019787	4	ubiquitin-like protein transferase activity	0.0226617	P63208	66	0.411	Q1	K	S-phase kinase-associated protein 1 OS=Homo sapiens OX=9606 GN=SKP1 PE=1 SV=2	SKP1	1	2.05841e-10	84.327	VIQWCTHHK(1)DDPPPPEDDENKEK	5	0.029289	1	1.562	1.461	1.627	0.671	0.605	0.633	0.411	3.6657e-05
Molecular Function	GO:0019787	4	ubiquitin-like protein transferase activity	0.0226617	P63279	49	0.356	Q1	K	SUMO-conjugating enzyme UBC9 OS=Homo sapiens OX=9606 GN=UBE2I PE=1 SV=1	UBE2I	1	0.00141737	86.699	K(1)GTPWEGGLFK	3	0.37048	2	1.601	1.604	1.683	0.538	0.568	0.634	0.356	3.7389e-05
Molecular Function	GO:0019787	4	ubiquitin-like protein transferase activity	0.0226617	Q7Z6Z7	476	0.494	Q1	K	E3 ubiquitin-protein ligase HUWE1 OS=Homo sapiens OX=9606 GN=HUWE1 PE=1 SV=3	HUWE1	1	0.00238767	90.15	ECPFVIK(1)PK	3	-0.18576	2	1.503	1.397	1.415	0.66	0.686	0.785	0.494	0.00024261
Molecular Function	GO:0016705	4	oxidoreductase activity, acting on paired donors, with incorporation or reduction of molecular oxygen	0.0676281	Q9C0B1	469	0.431	Q1	K	Alpha-ketoglutarate-dependent dioxygenase FTO OS=Homo sapiens OX=9606 GN=FTO PE=1 SV=3	FTO	1	6.61723e-06	122.55	TLPADQK(1)PECR	2	-1.0807	1	1.579	1.476	1.506	0.627	0.677	0.663	0.431	1.50745e-05
Molecular Function	GO:0016705	4	oxidoreductase activity, acting on paired donors, with incorporation or reduction of molecular oxygen	0.0676281	Q12797	646	0.392	Q1	K	Aspartyl/asparaginyl beta-hydroxylase OS=Homo sapiens OX=9606 GN=ASPH PE=1 SV=3	ASPH	1	0.000150126	98.942	GAPK(1)TCTLLEK	3	0.49951	2	1.584	1.579	1.567	0.626	0.608	0.62	0.392	2.7434e-08
Molecular Function	GO:0016705	4	oxidoreductase activity, acting on paired donors, with incorporation or reduction of molecular oxygen	0.0676281	P07237	308	0.278	Q1	K	Protein disulfide-isomerase OS=Homo sapiens OX=9606 GN=P4HB PE=1 SV=3	P4HB	1	0.00332344	86.898	ILEFFGLK(1)K	3	-0.031928	2	1.755	1.698	1.841	0.452	0.513	0.506	0.278	1.51387e-05
Molecular Function	GO:0016705	4	oxidoreductase activity, acting on paired donors, with incorporation or reduction of molecular oxygen	0.0676281	P07237	309	0.424	Q1	K	Protein disulfide-isomerase OS=Homo sapiens OX=9606 GN=P4HB PE=1 SV=3	P4HB	1	0.00170122	121.64	K(1)EECPAVR	3	0.4143	2	1.6	1.521	1.471	0.613	0.641	0.691	0.424	3.7866e-05
Molecular Function	GO:0017124	5	SH3 domain binding	0.384037	P50570	90	0.247	Q1	K	Dynamin-2 OS=Homo sapiens OX=9606 GN=DNM2 PE=1 SV=2	DNM2	1	0.007979	78.342	K(1)FTDFDEVR	2	-0.55845	1	1.768	1.787	1.917	0.504	0.415	0.435	0.247	2.2772e-05
Molecular Function	GO:0017124	5	SH3 domain binding	0.384037	Q16204	81	0.338	Q1	K	Coiled-coil domain-containing protein 6 OS=Homo sapiens OX=9606 GN=CCDC6 PE=1 SV=2	CCDC6	1	0.00126388	110.39	IELETYK(1)LK	3	0.58578	2	1.704	1.576	1.702	0.556	0.538	0.591	0.338	4.3748e-06
Molecular Function	GO:0008135	6	translation factor activity, RNA binding	0.0825164	Q9GZV4	27	0.482	Q1	K	Eukaryotic translation initiation factor 5A-2 OS=Homo sapiens OX=9606 GN=EIF5A2 PE=1 SV=3	EIF5A2	1	0.033182	76.064	K(1)NGFVVLK	3	-0.01779	2	1.424	1.491	1.449	0.743	0.761	0.599	0.482	0.00068034
Molecular Function	GO:0008135	6	translation factor activity, RNA binding	0.0825164	Q9GZV4	34	0.247	Q1	K	Eukaryotic translation initiation factor 5A-2 OS=Homo sapiens OX=9606 GN=EIF5A2 PE=1 SV=3	EIF5A2	1	0.000289488	93.096	KNGFVVLK(1)GR	3	0.33973	4	1.911	1.741	1.829	0.459	0.442	0.452	0.247	5.5759e-07
Molecular Function	GO:0008135	6	translation factor activity, RNA binding	0.0825164	P13639	571	0.45	Q1	K	Elongation factor 2 OS=Homo sapiens OX=9606 GN=EEF2 PE=1 SV=4	EEF2	1	3.14699e-17	154.28	DLEEDHACIPIK(1)K	2	-0.69618	3	1.467	1.535	1.479	0.652	0.65	0.715	0.45	1.99925e-05
Molecular Function	GO:0008135	6	translation factor activity, RNA binding	0.0825164	P13639	594	0.491	Q1	K	Elongation factor 2 OS=Homo sapiens OX=9606 GN=EEF2 PE=1 SV=4	EEF2	1	1.69803e-09	110.12	ETVSEESNVLCLSK(1)SPNK	3	-0.52971	1	1.437	1.587	1.307	0.754	0.662	0.709	0.491	0.00046028
Molecular Function	GO:0008135	6	translation factor activity, RNA binding	0.0825164	Q5VTE0	376	0.352	Q1	K	Putative elongation factor 1-alpha-like 3 OS=Homo sapiens OX=9606 GN=EEF1A1P5 PE=5 SV=1	EEF1A1P5	1	0.0336053	78.113	FAELK(1)EK	2	-0.6028	1	1.692	1.634	1.59	0.574	0.573	0.584	0.352	3.2826e-07
Molecular Function	GO:0008135	6	translation factor activity, RNA binding	0.0825164	P47813	56	0.392	Q1	K	Eukaryotic translation initiation factor 1A, X-chromosomal OS=Homo sapiens OX=9606 GN=EIF1AX PE=1 SV=2	EIF1AX	1	0.00060676	84.507	LEAMCFDGVK(1)R	2	-0.88273	2	1.781	1.38	1.574	0.548	0.731	0.579	0.392	0.00122466
Molecular Function	GO:0008135	6	translation factor activity, RNA binding	0.0825164	O15372	180	0.383	Q1	K	Eukaryotic translation initiation factor 3 subunit H OS=Homo sapiens OX=9606 GN=EIF3H PE=1 SV=1	EIF3H	1	0.000139172	116.24	EK(1)DFSPEALK	3	1.7709	2	1.582	1.612	1.575	0.598	0.606	0.622	0.383	1.1966e-07
Molecular Function	GO:0008135	6	translation factor activity, RNA binding	0.0825164	Q92616	793	0.441	Q1	K	eIF-2-alpha kinase activator GCN1 OS=Homo sapiens OX=9606 GN=GCN1 PE=1 SV=6	GCN1	1	0.0122105	60.91	ANMK(1)RENK	2	-2.2334	1	1.609	1.454	1.461	0.646	0.676	0.673	0.441	2.114e-05
Molecular Function	GO:0008135	6	translation factor activity, RNA binding	0.0825164	Q96RP9	520	0.177	Q1	K	Elongation factor G, mitochondrial OS=Homo sapiens OX=9606 GN=GFM1 PE=1 SV=2	GFM1	1	0.00172824	80.312	EYGCPCITGK(1)PK	2	-0.20738	2	2.037	1.995	1.897	0.327	0.351	0.37	0.177	9.8724e-07
Molecular Function	GO:0008135	6	translation factor activity, RNA binding	0.0825164	Q9ULC4	51	0.492	Q1	K	Malignant T-cell-amplified sequence 1 OS=Homo sapiens OX=9606 GN=MCTS1 PE=1 SV=1	MCTS1	0.999995	0.00308356	87.895	KDPVK(1)IVR	3	-0.75939	1	1.543	1.444	1.343	0.732	0.674	0.723	0.492	0.000119273
Molecular Function	GO:0008135	6	translation factor activity, RNA binding	0.0825164	Q13347	141	0.239	Q1	K	Eukaryotic translation initiation factor 3 subunit I OS=Homo sapiens OX=9606 GN=EIF3I PE=1 SV=1	EIF3I	1	1.15565e-06	80.382	DPSQIDNNEPYMK(1)IPCNDSK	3	-0.76402	1	1.732	1.919	1.87	0.497	0.388	0.432	0.239	5.5522e-05
Molecular Function	GO:0008135	6	translation factor activity, RNA binding	0.0825164	P41567	66	0.249	Q1	K	Eukaryotic translation initiation factor 1 OS=Homo sapiens OX=9606 GN=EIF1 PE=1 SV=1	EIF1	1	1.09098e-35	151	K(1)FACNGTVIEHPEYGEVIQLQGDQR	3	-0.068649	1	1.685	1.755	2.011	0.448	0.386	0.524	0.249	0.000176697
Molecular Function	GO:0004867	7	serine-type endopeptidase inhibitor activity	0.212155	O43291	170	0.282	Q1	K	Kunitz-type protease inhibitor 2 OS=Homo sapiens OX=9606 GN=SPINT2 PE=1 SV=2	SPINT2	1	0.0340619	77.923	GNK(1)NSYR	2	-0.88705	1	1.798	1.763	1.715	0.471	0.578	0.439	0.282	0.000104409
Molecular Function	GO:0004867	7	serine-type endopeptidase inhibitor activity	0.212155	P50454	160	0.454	Q1	K	Serpin H1 OS=Homo sapiens OX=9606 GN=SERPINH1 PE=1 SV=2	SERPINH1	1	4.32455e-11	129.17	QHYNCEHSK(1)INFR	3	0.55646	2	1.446	1.567	1.452	0.654	0.712	0.663	0.454	2.4472e-05
Molecular Function	GO:0031491	4	nucleosome binding	0.247465	O75367	304	0.372	Q1	K	Core histone macro-H2A.1 OS=Homo sapiens OX=9606 GN=H2AFY PE=1 SV=4	H2AFY	1	0.000144859	116.24	NCLALADDK(1)K	2	0.39339	2	1.634	1.692	1.494	0.556	0.613	0.622	0.372	4.0974e-05
Molecular Function	GO:0031491	4	nucleosome binding	0.247465	P84243	37	0.422	Q1	K	Histone H3.3 OS=Homo sapiens OX=9606 GN=H3-3A PE=1 SV=2	H3-3A	1	0.000237623	93.623	K(1)SAPSTGGVK(1)K	2	-0.62162	5	1.579	1.45	1.573	0.637	0.664	0.641	0.422	4.7532e-06
Molecular Function	GO:0031491	4	nucleosome binding	0.247465	Q5SSJ5	365	0.363	Q1	K	Heterochromatin protein 1-binding protein 3 OS=Homo sapiens OX=9606 GN=HP1BP3 PE=1 SV=1	HP1BP3	1	0.00080643	119.53	TCSTTALK(1)K	2	-0.20534	1	1.624	1.614	1.624	0.608	0.554	0.603	0.363	0.00086097
Molecular Function	GO:0017025	5	TBP-class protein binding	0.327653	Q86VP6	1156	0.274	Q1	K	Cullin-associated NEDD8-dissociated protein 1 OS=Homo sapiens OX=9606 GN=CAND1 PE=1 SV=2	CAND1	1	0.0029114	109.66	ATCTTK(1)VK	2	-0.76433	1	1.718	1.882	1.712	0.446	0.471	0.538	0.274	3.721e-05
Molecular Function	GO:0017025	5	TBP-class protein binding	0.327653	P17980	125	0.237	Q1	K	26S proteasome regulatory subunit 6A OS=Homo sapiens OX=9606 GN=PSMC3 PE=1 SV=3	PSMC3	1	0.00143165	104.05	CAVIK(1)TSTR	2	-2.0264	1	1.899	1.947	1.692	0.467	0.463	0.384	0.237	4.4152e-05
Molecular Function	GO:0017025	5	TBP-class protein binding	0.327653	P17980	245	0.411	Q1	K	26S proteasome regulatory subunit 6A OS=Homo sapiens OX=9606 GN=PSMC3 PE=1 SV=3	PSMC3	1	1.931e-13	150.11	ACAAQTK(1)ATFLK	2	0.060852	2	1.561	1.511	1.576	0.622	0.649	0.638	0.411	4.732e-07
Molecular Function	GO:0030235	4	nitric-oxide synthase regulator activity	0.0210207	P08238	559	0.479	Q1	K	Heat shock protein HSP 90-beta OS=Homo sapiens OX=9606 GN=HSP90AB1 PE=1 SV=4	HSP90AB1	1	0.00072324	111.17	AK(1)FENLCK	3	-0.027707	2	1.508	1.469	1.398	0.714	0.677	0.704	0.479	1.56421e-05
Molecular Function	GO:0030235	4	nitric-oxide synthase regulator activity	0.0210207	P08238	568	0.153	Q1	K	Heat shock protein HSP 90-beta OS=Homo sapiens OX=9606 GN=HSP90AB1 PE=1 SV=4	HSP90AB1	1	0.0129056	82.417	LMK(1)EILDK	2	-0.52759	1	2.117	2.005	1.986	0.335	0.306	0.291	0.153	1.0451e-06
Molecular Function	GO:0030235	4	nitric-oxide synthase regulator activity	0.0210207	P07900	576	0.235	Q1	K	Heat shock protein HSP 90-alpha OS=Homo sapiens OX=9606 GN=HSP90AA1 PE=1 SV=5	HSP90AA1	1	0.00316475	93.096	IMK(1)DILEK	3	0.51489	4	1.881	1.876	1.791	0.418	0.456	0.43	0.235	5.6281e-07
Molecular Function	GO:0008757	6	S-adenosylmethionine-dependent methyltransferase activity	0.104114	Q08J23	95	0.49	Q1	K	RNA cytosine C(5)-methyltransferase NSUN2 OS=Homo sapiens OX=9606 GN=NSUN2 PE=1 SV=2	NSUN2	1	3.66672e-08	147.2	EILHCLK(1)NK	2	-0.40224	2	1.449	1.458	1.423	0.715	0.702	0.706	0.49	7.9158e-08
Molecular Function	GO:0008757	6	S-adenosylmethionine-dependent methyltransferase activity	0.104114	P26358	1004	0.462	Q1	K	DNA (cytosine-5)-methyltransferase 1 OS=Homo sapiens OX=9606 GN=DNMT1 PE=1 SV=2	DNMT1	1	0.00280758	68.972	K(1)SNGRPNETDIK	3	-1.3658	1	1.492	1.447	1.501	0.685	0.719	0.646	0.462	1.97721e-05
Molecular Function	GO:0008757	6	S-adenosylmethionine-dependent methyltransferase activity	0.104114	Q8NEZ4	758	0.436	Q1	K	Histone-lysine N-methyltransferase 2C OS=Homo sapiens OX=9606 GN=KMT2C PE=1 SV=3	KMT2C	1	1.59482e-15	166.6	DVSYQGGK(1)SIK	2	-0.421	2	1.508	1.513	1.523	0.677	0.667	0.635	0.436	0.00055665
Molecular Function	GO:0008757	6	S-adenosylmethionine-dependent methyltransferase activity	0.104114	Q9UMN6	926	0.278	Q1	K	Histone-lysine N-methyltransferase 2B OS=Homo sapiens OX=9606 GN=KMT2B PE=1 SV=1	KMT2B	1	1.13152e-13	91.079	GK(1)VEAAGPGGESEPTGSGGTLAHTPR	3	-0.28959	1	1.528	1.636	2.129	0.557	0.644	0.271	0.278	0.0095622
Molecular Function	GO:0008757	6	S-adenosylmethionine-dependent methyltransferase activity	0.104114	P22087	102	0.431	Q1	K	rRNA 2'-O-methyltransferase fibrillarin OS=Homo sapiens OX=9606 GN=FBL PE=1 SV=2	FBL	1	0.006593	64.82	GK(1)EDALVTK	3	0.56476	1	1.614	1.463	1.488	0.653	0.625	0.69	0.431	3.7804e-05
Molecular Function	GO:0008757	6	S-adenosylmethionine-dependent methyltransferase activity	0.104114	P61964	159	0.483	Q1	K	WD repeat-containing protein 5 OS=Homo sapiens OX=9606 GN=WDR5 PE=1 SV=1	WDR5	1	0.0091824	88.495	IWDVK(1)TGK	3	0.80805	2	1.444	1.439	1.473	0.691	0.714	0.7	0.483	2.2067e-07
Molecular Function	GO:0022803	4	passive transmembrane transporter activity	0.327653	O00299	166	0.49	Q1	K	Chloride intracellular channel protein 1 OS=Homo sapiens OX=9606 GN=CLIC1 PE=1 SV=4	CLIC1	1	3.02602e-14	127.32	K(1)FLDGNELTLADCNLLPK	3	0.41049	1	1.504	1.463	1.365	0.706	0.645	0.77	0.49	0.00025982
Molecular Function	GO:0022803	4	passive transmembrane transporter activity	0.327653	Q14573	258	0.471	Q1	K	Inositol 1,4,5-trisphosphate receptor type 3 OS=Homo sapiens OX=9606 GN=ITPR3 PE=1 SV=2	ITPR3	1	0.000333363	105.13	FLTCDEYK(1)GK	2	-1.2035	2	1.529	1.425	1.454	0.707	0.674	0.693	0.471	3.6728e-06
Molecular Function	GO:0016903	4	oxidoreductase activity, acting on the aldehyde or oxo group of donors	0.00665612	P11766	107	0.231	Q1	K	Alcohol dehydrogenase class-3 OS=Homo sapiens OX=9606 GN=ADH5 PE=1 SV=4	ADH5	1	1.45045e-06	115.57	FCLNPK(1)TNLCQK	2	0.14803	1	2	1.774	1.804	0.398	0.407	0.482	0.231	3.6245e-05
Molecular Function	GO:0016903	4	oxidoreductase activity, acting on the aldehyde or oxo group of donors	0.00665612	P08559	321	0.477	Q1	K	Pyruvate dehydrogenase E1 component subunit alpha, somatic form, mitochondrial OS=Homo sapiens OX=9606 GN=PDHA1 PE=1 SV=3	PDHA1	1	0.000127501	116.74	SDPIMLLK(1)DR	3	-0.61511	3	1.475	1.483	1.42	0.691	0.66	0.738	0.477	3.5027e-05
Molecular Function	GO:0016903	4	oxidoreductase activity, acting on the aldehyde or oxo group of donors	0.00665612	P08559	313	0.443	Q1	K	Pyruvate dehydrogenase E1 component subunit alpha, somatic form, mitochondrial OS=Homo sapiens OX=9606 GN=PDHA1 PE=1 SV=3	PDHA1	1	0.000353207	107.09	SK(1)SDPIMLLK	2	-0.43555	2	1.553	1.469	1.495	0.707	0.659	0.636	0.443	2.0296e-05
Molecular Function	GO:0016903	4	oxidoreductase activity, acting on the aldehyde or oxo group of donors	0.00665612	Q02218	401	0.272	Q1	K	2-oxoglutarate dehydrogenase, mitochondrial OS=Homo sapiens OX=9606 GN=OGDH PE=1 SV=3	OGDH	1	0.00209311	68.972	AEQFYCGDTEGK(1)K	2	0.74858	1	1.697	1.793	1.836	0.505	0.541	0.405	0.272	0.000136433
Molecular Function	GO:0016903	4	oxidoreductase activity, acting on the aldehyde or oxo group of donors	0.00665612	Q02252	331	0.425	Q1	K	Methylmalonate-semialdehyde dehydrogenase [acylating], mitochondrial OS=Homo sapiens OX=9606 GN=ALDH6A1 PE=1 SV=2	ALDH6A1	1	0.000862761	80.69	K(1)WLPELVEHAK	3	-0.56312	1	1.597	1.582	1.405	0.569	0.625	0.753	0.425	0.00072338
Molecular Function	GO:0016903	4	oxidoreductase activity, acting on the aldehyde or oxo group of donors	0.00665612	P05091	52	0.475	Q1	K	Aldehyde dehydrogenase, mitochondrial OS=Homo sapiens OX=9606 GN=ALDH2 PE=1 SV=2	ALDH2	1	1.86737e-16	95.646	K(1)TFPTVNPSTGEVICQVAEGDKEDVDK	4	-0.54916	1	1.456	1.43	1.497	0.65	0.681	0.75	0.475	7.6005e-05
Molecular Function	GO:0016903	4	oxidoreductase activity, acting on the aldehyde or oxo group of donors	0.00665612	P47895	48	0.492	Q1	K	Aldehyde dehydrogenase family 1 member A3 OS=Homo sapiens OX=9606 GN=ALDH1A3 PE=1 SV=2	ALDH1A3	1	0.00157174	86.911	K(1)FATCNPSTR	2	-0.43183	1	1.53	1.442	1.355	0.742	0.696	0.693	0.492	6.4523e-05
Molecular Function	GO:0016903	4	oxidoreductase activity, acting on the aldehyde or oxo group of donors	0.00665612	P11177	354	0.474	Q1	K	Pyruvate dehydrogenase E1 component subunit beta, mitochondrial OS=Homo sapiens OX=9606 GN=PDHB PE=1 SV=3	PDHB	1	0.00265664	97.431	DIIFAIK(1)K	2	-0.98846	2	1.48	1.43	1.478	0.7	0.665	0.717	0.474	3.69e-06
Molecular Function	GO:0036002	6	pre-mRNA binding	0.167059	P09234	22	0.257	Q1	K	U1 small nuclear ribonucleoprotein C OS=Homo sapiens OX=9606 GN=SNRPC PE=1 SV=1	SNRPC	1	0.00671323	88.921	K(1)THCSGR	2	-0.90683	2	1.814	1.775	1.824	0.441	0.469	0.482	0.257	5.074e-07
Molecular Function	GO:0036002	6	pre-mRNA binding	0.167059	P48436	68	0.344	Q1	K	Transcription factor SOX-9 OS=Homo sapiens OX=9606 GN=SOX9 PE=1 SV=1	SOX9	1	5.87822e-10	139.46	ESEEDK(1)FPVCIR	3	0.51072	2	1.718	1.709	1.526	0.562	0.564	0.579	0.344	1.5787e-05
Molecular Function	GO:0036002	6	pre-mRNA binding	0.167059	P17844	197	0.252	Q1	K	Probable ATP-dependent RNA helicase DDX5 OS=Homo sapiens OX=9606 GN=DDX5 PE=1 SV=1	DDX5	1	7.68943e-05	102.9	LK(1)STCIYGGAPK	3	-1.9744	2	1.857	1.777	1.81	0.443	0.473	0.458	0.252	2.2599e-07
Molecular Function	GO:0036002	6	pre-mRNA binding	0.167059	P17844	351	0.391	Q1	K	Probable ATP-dependent RNA helicase DDX5 OS=Homo sapiens OX=9606 GN=DDX5 PE=1 SV=1	DDX5	1	0.00120581	112.36	TIVFVETK(1)R	2	-0.61373	2	1.629	1.536	1.571	0.611	0.645	0.596	0.391	2.686e-06
Molecular Function	GO:0005504	7	fatty acid binding	0.155835	P11766	107	0.231	Q1	K	Alcohol dehydrogenase class-3 OS=Homo sapiens OX=9606 GN=ADH5 PE=1 SV=4	ADH5	1	1.45045e-06	115.57	FCLNPK(1)TNLCQK	2	0.14803	1	2	1.774	1.804	0.398	0.407	0.482	0.231	3.6245e-05
Molecular Function	GO:0005504	7	fatty acid binding	0.155835	Q01469	55	0.389	Q1	K	Fatty acid-binding protein 5 OS=Homo sapiens OX=9606 GN=FABP5 PE=1 SV=3	FABP5	1	1.15862e-30	196.5	NLTIK(1)TESTLK	2	0.3101	1	1.584	1.581	1.576	0.618	0.585	0.642	0.389	0.00081888
Molecular Function	GO:0005504	7	fatty acid binding	0.155835	Q01469	82	0.479	Q1	K	Fatty acid-binding protein 5 OS=Homo sapiens OX=9606 GN=FABP5 PE=1 SV=3	FABP5	1	6.06434e-14	117.35	K(1)TQTVCNFTDGALVQHQEWDGK	4	-0.19745	2	1.462	1.481	1.43	0.725	0.704	0.666	0.479	1.53003e-05
Molecular Function	GO:0016836	5	hydro-lyase activity	0.107338	P55084	188	0.248	Q1	K	Trifunctional enzyme subunit beta, mitochondrial OS=Homo sapiens OX=9606 GN=HADHB PE=1 SV=3	HADHB	1	0.000377405	113.93	LMLDLNK(1)AK	3	0.19183	2	1.873	1.814	1.785	0.46	0.448	0.449	0.248	5.8526e-08
Molecular Function	GO:0016836	5	hydro-lyase activity	0.107338	P55084	293	0.446	Q1	K	Trifunctional enzyme subunit beta, mitochondrial OS=Homo sapiens OX=9606 GN=HADHB PE=1 SV=3	HADHB	1	0.0081807	79.116	LK(1)PAFIK	3	-0.1348	1	1.416	1.582	1.5	0.668	0.666	0.672	0.446	0.00158112
Molecular Function	GO:0016836	5	hydro-lyase activity	0.107338	Q99497	62	0.381	Q1	K	Protein/nucleic acid deglycase DJ-1 OS=Homo sapiens OX=9606 GN=PARK7 PE=1 SV=2	PARK7	1	2.72946e-27	162.29	DVVICPDASLEDAK(1)K	2	-0.16613	1	1.505	1.635	1.635	0.609	0.57	0.638	0.381	2.1387e-05
Molecular Function	GO:0016836	5	hydro-lyase activity	0.107338	P06733	335	0.433	Q1	K	Alpha-enolase OS=Homo sapiens OX=9606 GN=ENO1 PE=1 SV=2	ENO1	1	9.75047e-11	130.72	AVNEK(1)SCNCLLLK	2	0.29651	6	1.575	1.526	1.454	0.656	0.66	0.657	0.433	0.00077832
Molecular Function	GO:0016836	5	hydro-lyase activity	0.107338	P40939	60	0.394	Q1	K	Trifunctional enzyme subunit alpha, mitochondrial OS=Homo sapiens OX=9606 GN=HADHA PE=1 SV=2	HADHA	1	0.000326831	92.38	INSPNSK(1)VNTLSK	2	1.332	1	1.576	1.647	1.499	0.632	0.583	0.645	0.394	2.1245e-05
Molecular Function	GO:0016836	5	hydro-lyase activity	0.107338	P40939	353	0.198	Q1	K	Trifunctional enzyme subunit alpha, mitochondrial OS=Homo sapiens OX=9606 GN=HADHA PE=1 SV=2	HADHA	1	0.00293526	99.442	NK(1)FGAPQK	3	-0.27395	2	2.008	1.903	1.879	0.398	0.379	0.367	0.198	4.0698e-07
Molecular Function	GO:0016836	5	hydro-lyase activity	0.107338	P40939	644	0.486	Q1	K	Trifunctional enzyme subunit alpha, mitochondrial OS=Homo sapiens OX=9606 GN=HADHA PE=1 SV=2	HADHA	1	4.34993e-05	101.89	GFYIYQEGVK(1)R	2	-1.1374	3	1.474	1.433	1.437	0.671	0.714	0.728	0.486	1.51598e-05
Molecular Function	GO:0016836	5	hydro-lyase activity	0.107338	P40939	411	0.18	Q1	K	Trifunctional enzyme subunit alpha, mitochondrial OS=Homo sapiens OX=9606 GN=HADHA PE=1 SV=2	HADHA	1	0.0197409	87.476	GLNDK(1)VK	2	-0.16327	1	2.009	2.02	1.874	0.359	0.375	0.331	0.18	1.2788e-06
Molecular Function	GO:0016836	5	hydro-lyase activity	0.107338	O60547	338	0.381	Q1	K	GDP-mannose 4,6 dehydratase OS=Homo sapiens OX=9606 GN=GMDS PE=1 SV=1	GMDS	1	8.18842e-10	116.13	YYRPTEVDFLQGDCTK(1)AK	3	-1.1008	1	1.629	1.579	1.575	0.613	0.602	0.605	0.381	7.3982e-08
Molecular Function	GO:0033293	6	monocarboxylic acid binding	0.0969038	P11766	107	0.231	Q1	K	Alcohol dehydrogenase class-3 OS=Homo sapiens OX=9606 GN=ADH5 PE=1 SV=4	ADH5	1	1.45045e-06	115.57	FCLNPK(1)TNLCQK	2	0.14803	1	2	1.774	1.804	0.398	0.407	0.482	0.231	3.6245e-05
Molecular Function	GO:0033293	6	monocarboxylic acid binding	0.0969038	Q01469	55	0.389	Q1	K	Fatty acid-binding protein 5 OS=Homo sapiens OX=9606 GN=FABP5 PE=1 SV=3	FABP5	1	1.15862e-30	196.5	NLTIK(1)TESTLK	2	0.3101	1	1.584	1.581	1.576	0.618	0.585	0.642	0.389	0.00081888
Molecular Function	GO:0033293	6	monocarboxylic acid binding	0.0969038	Q01469	82	0.479	Q1	K	Fatty acid-binding protein 5 OS=Homo sapiens OX=9606 GN=FABP5 PE=1 SV=3	FABP5	1	6.06434e-14	117.35	K(1)TQTVCNFTDGALVQHQEWDGK	4	-0.19745	2	1.462	1.481	1.43	0.725	0.704	0.666	0.479	1.53003e-05
Molecular Function	GO:0033293	6	monocarboxylic acid binding	0.0969038	P11717	1285	0.431	Q1	K	Cation-independent mannose-6-phosphate receptor OS=Homo sapiens OX=9606 GN=IGF2R PE=1 SV=3	IGF2R	1	0.0187544	68.657	VVSSCQEK(1)R	2	-1.3987	1	1.571	1.542	1.451	0.618	0.683	0.664	0.431	2.2521e-05
Molecular Function	GO:0005070	5	SH3/SH2 adaptor activity	0.155835	Q14847	50	0.459	Q1	K	LIM and SH3 domain protein 1 OS=Homo sapiens OX=9606 GN=LASP1 PE=1 SV=2	LASP1	1	0.010633	57.785	K(1)PYCNAHYPK	3	-0.53436	2	1.432	1.49	1.529	0.706	0.675	0.66	0.459	4.5956e-06
Molecular Function	GO:0005070	5	SH3/SH2 adaptor activity	0.155835	Q06124	178	0.256	Q1	K	Tyrosine-protein phosphatase non-receptor type 11 OS=Homo sapiens OX=9606 GN=PTPN11 PE=1 SV=2	PTPN11	1	0.00118893	79.346	CQELK(1)YDVGGGER	2	0.10773	2	1.739	1.852	1.824	0.421	0.505	0.46	0.256	1.83063e-05
Molecular Function	GO:0051920	5	peroxiredoxin activity	0.212155	Q99497	62	0.381	Q1	K	Protein/nucleic acid deglycase DJ-1 OS=Homo sapiens OX=9606 GN=PARK7 PE=1 SV=2	PARK7	1	2.72946e-27	162.29	DVVICPDASLEDAK(1)K	2	-0.16613	1	1.505	1.635	1.635	0.609	0.57	0.638	0.381	2.1387e-05
Molecular Function	GO:0051920	5	peroxiredoxin activity	0.212155	Q06830	178	0.453	Q1	K	Peroxiredoxin-1 OS=Homo sapiens OX=9606 GN=PRDX1 PE=1 SV=1	PRDX1	0.999997	5.6436e-11	97.69	HGEVCPAGWK(1)PGSDTIKPDVQK	5	0.01739	4	1.498	1.509	1.469	0.721	0.688	0.619	0.453	6.26e-05
Molecular Function	GO:0050661	6	NADP binding	0.0830641	Q13423	1079	0.488	Q1	K	NAD(P) transhydrogenase, mitochondrial OS=Homo sapiens OX=9606 GN=NNT PE=1 SV=3	NNT	1	0.00597409	77.124	TCDALQAK(1)VR	2	-0.79801	1	1.411	1.372	1.558	0.785	0.705	0.63	0.488	0.00063862
Molecular Function	GO:0050661	6	NADP binding	0.0830641	Q13423	1071	0.427	Q1	K	NAD(P) transhydrogenase, mitochondrial OS=Homo sapiens OX=9606 GN=NNT PE=1 SV=3	NNT	1	0.00106629	114.86	K(1)TCDALQAK	2	0.43756	1	1.55	1.453	1.573	0.625	0.675	0.656	0.427	1.68698e-05
Molecular Function	GO:0050661	6	NADP binding	0.0830641	P48163	422	0.439	Q1	K	NADP-dependent malic enzyme OS=Homo sapiens OX=9606 GN=ME1 PE=1 SV=1	ME1	1	2.51763e-07	113.69	AECSAEQCYK(1)ITK	2	-0.067613	2	1.516	1.5	1.514	0.672	0.603	0.712	0.439	0.0034753
Molecular Function	GO:0050661	6	NADP binding	0.0830641	P00390	470	0.244	Q1	K	Glutathione reductase, mitochondrial OS=Homo sapiens OX=9606 GN=GSR PE=1 SV=2	GSR	1	0.00839172	77.662	MVCANK(1)EEK	2	1.8422	1	1.889	1.889	1.721	0.46	0.463	0.417	0.244	3.3348e-06
Molecular Function	GO:0050661	6	NADP binding	0.0830641	O60547	338	0.381	Q1	K	GDP-mannose 4,6 dehydratase OS=Homo sapiens OX=9606 GN=GMDS PE=1 SV=1	GMDS	1	8.18842e-10	116.13	YYRPTEVDFLQGDCTK(1)AK	3	-1.1008	1	1.629	1.579	1.575	0.613	0.602	0.605	0.381	7.3982e-08
Molecular Function	GO:0008301	6	DNA binding, bending	0.269966	P50238	30	0.291	Q1	K	Cysteine-rich protein 1 OS=Homo sapiens OX=9606 GN=CRIP1 PE=1 SV=3	CRIP1	1	0.00147996	81.784	PCLK(1)CEK	3	0.08329	2	1.801	1.905	1.522	0.499	0.509	0.512	0.291	0.0030239
Molecular Function	GO:0008301	6	DNA binding, bending	0.269966	P09429	50	0.498	Q1	K	High mobility group protein B1 OS=Homo sapiens OX=9606 GN=HMGB1 PE=1 SV=3	HMGB1	1	0.0185525	64.567	WK(1)TMSAK	3	-0.52405	1	1.515	1.361	1.429	0.766	0.686	0.694	0.498	0.000119089
Molecular Function	GO:0003774	8	motor activity	0.0459774	P35579	180	0.355	Q1	K	Myosin-9 OS=Homo sapiens OX=9606 GN=MYH9 PE=1 SV=4	MYH9	1	5.30441e-22	143.04	EDQSILCTGESGAGK(1)TENTK	3	-0.56027	1	1.567	1.76	1.57	0.594	0.577	0.566	0.355	1.72257e-05
Molecular Function	GO:0003774	8	motor activity	0.0459774	P35579	565	0.403	Q1	K	Myosin-9 OS=Homo sapiens OX=9606 GN=MYH9 PE=1 SV=4	MYH9	1	0.00243053	54.898	DK(1)ADFCIIHYAGK	3	-0.65742	1	1.575	1.478	1.63	0.589	0.674	0.622	0.403	4.3735e-05
Molecular Function	GO:0003774	8	motor activity	0.0459774	Q9H0B6	369	0.384	Q1	K	Kinesin light chain 2 OS=Homo sapiens OX=9606 GN=KLC2 PE=1 SV=1	KLC2	1	2.76762e-08	142.38	TK(1)NNLASCYLK	2	-0.26727	1	1.643	1.509	1.614	0.598	0.596	0.637	0.384	4.6155e-06
Molecular Function	GO:0003774	8	motor activity	0.0459774	Q9UM54	240	0.316	Q1	K	Unconventional myosin-VI OS=Homo sapiens OX=9606 GN=MYO6 PE=1 SV=4	MYO6	1	0.0165223	70.056	ICVQGK(1)EER	2	-0.27571	1	1.747	1.741	1.607	0.539	0.568	0.505	0.316	1.61137e-05
Molecular Function	GO:0003774	8	motor activity	0.0459774	Q9UM54	325	0.466	Q1	K	Unconventional myosin-VI OS=Homo sapiens OX=9606 GN=MYO6 PE=1 SV=4	MYO6	1	0.0271518	81.296	MCTAMK(1)K	2	-0.14267	1	1.465	1.483	1.477	0.704	0.711	0.646	0.466	0.00160093
Molecular Function	GO:0003774	8	motor activity	0.0459774	Q92614	1429	0.474	Q1	K	Unconventional myosin-XVIIIa OS=Homo sapiens OX=9606 GN=MYO18A PE=1 SV=3	MYO18A	1	0.000436442	127.84	ALQQLK(1)K	2	0.50423	1	1.45	1.472	1.466	0.671	0.71	0.7	0.474	9.1511e-07
Molecular Function	GO:0003774	8	motor activity	0.0459774	Q8TD57	2921	0.476	Q1	K	Dynein heavy chain 3, axonemal OS=Homo sapiens OX=9606 GN=DNAH3 PE=2 SV=1	DNAH3	1	0.0106296	49.189	LAAQMQK(1)LNQK	2	-1.4123	1	1.444	1.498	1.439	0.637	0.719	0.728	0.476	7.733e-05
Molecular Function	GO:0003774	8	motor activity	0.0459774	Q9UQE7	977	0.44	Q1	K	Structural maintenance of chromosomes protein 3 OS=Homo sapiens OX=9606 GN=SMC3 PE=1 SV=2	SMC3	0.99997	0.0237068	46.88	KLEQCNTELK(1)K	3	1.6771	1	1.475	1.481	1.565	0.661	0.655	0.674	0.44	1.2541e-06
Molecular Function	GO:0008026	10	ATP-dependent helicase activity	0.139696	Q13838	162	0.422	Q1	K	Spliceosome RNA helicase DDX39B OS=Homo sapiens OX=9606 GN=DDX39B PE=1 SV=1	DDX39B	1	0.0197688	89.827	KDEEVLK(1)K	2	-0.64126	3	1.559	1.602	1.441	0.667	0.628	0.647	0.422	1.92273e-05
Molecular Function	GO:0008026	10	ATP-dependent helicase activity	0.139696	Q13838	241	0.44	Q1	K	Spliceosome RNA helicase DDX39B OS=Homo sapiens OX=9606 GN=DDX39B PE=1 SV=1	DDX39B	1	2.52188e-06	104.2	K(1)FMQDPMEIFVDDETK	3	0.192	1	1.517	1.49	1.519	0.687	0.659	0.647	0.44	8.2451e-07
Molecular Function	GO:0008026	10	ATP-dependent helicase activity	0.139696	Q08211	467	0.496	Q1	K	ATP-dependent RNA helicase A OS=Homo sapiens OX=9606 GN=DHX9 PE=1 SV=4	DHX9	1	5.82684e-13	138.19	GEEPGK(1)SCGYSVR	2	0.64535	1	1.347	1.5	1.457	0.733	0.662	0.74	0.496	0.000123788
Molecular Function	GO:0008026	10	ATP-dependent helicase activity	0.139696	Q9NUU7	343	0.497	Q1	K	ATP-dependent RNA helicase DDX19A OS=Homo sapiens OX=9606 GN=DDX19A PE=1 SV=1	DDX19A	1	6.00522e-10	139.58	K(1)TASWLAAELSK	2	-0.2171	1	1.404	1.445	1.452	0.681	0.735	0.723	0.497	1.52266e-05
Molecular Function	GO:0008026	10	ATP-dependent helicase activity	0.139696	Q9GZR7	17	0.492	Q1	K	ATP-dependent RNA helicase DDX24 OS=Homo sapiens OX=9606 GN=DDX24 PE=1 SV=1	DDX24	1	0.00026351	110.92	QSSCGK(1)FQTK	3	0.27018	2	1.411	1.52	1.394	0.754	0.673	0.7	0.492	7.9084e-05
Molecular Function	GO:0008026	10	ATP-dependent helicase activity	0.139696	Q92900	378	0.213	Q1	K	Regulator of nonsense transcripts 1 OS=Homo sapiens OX=9606 GN=UPF1 PE=1 SV=2	UPF1	1	0.000607611	91.961	YK(1)GDLAPLWK	2	-0.82536	3	1.986	1.884	1.816	0.381	0.438	0.394	0.213	3.1039e-06
Molecular Function	GO:0008026	10	ATP-dependent helicase activity	0.139696	Q92499	234	0.498	Q1	K	ATP-dependent RNA helicase DDX1 OS=Homo sapiens OX=9606 GN=DDX1 PE=1 SV=2	DDX1	1	9.11479e-13	128.71	NQALFPACVLK(1)NAELK	3	0.095706	3	1.391	1.44	1.473	0.764	0.684	0.694	0.498	5.7082e-05
Molecular Function	GO:0008026	10	ATP-dependent helicase activity	0.139696	P17844	197	0.252	Q1	K	Probable ATP-dependent RNA helicase DDX5 OS=Homo sapiens OX=9606 GN=DDX5 PE=1 SV=1	DDX5	1	7.68943e-05	102.9	LK(1)STCIYGGAPK	3	-1.9744	2	1.857	1.777	1.81	0.443	0.473	0.458	0.252	2.2599e-07
Molecular Function	GO:0008026	10	ATP-dependent helicase activity	0.139696	P17844	351	0.391	Q1	K	Probable ATP-dependent RNA helicase DDX5 OS=Homo sapiens OX=9606 GN=DDX5 PE=1 SV=1	DDX5	1	0.00120581	112.36	TIVFVETK(1)R	2	-0.61373	2	1.629	1.536	1.571	0.611	0.645	0.596	0.391	2.686e-06
Molecular Function	GO:0008026	10	ATP-dependent helicase activity	0.139696	O43143	754	0.226	Q1	K	Pre-mRNA-splicing factor ATP-dependent RNA helicase DHX15 OS=Homo sapiens OX=9606 GN=DHX15 PE=1 SV=2	DHX15	1	1.67223e-05	106.32	TCTDIK(1)PEWLVK	3	0.85098	2	1.857	1.853	1.89	0.41	0.462	0.396	0.226	0.00100058
Molecular Function	GO:0070403	7	NAD+ binding	0.103166	Q8NBZ7	235	0.369	Q1	K	UDP-glucuronic acid decarboxylase 1 OS=Homo sapiens OX=9606 GN=UXS1 PE=1 SV=1	UXS1	1	0.0220714	76.605	ACYDEGK(1)R	2	-1.2846	1	1.648	1.606	1.582	0.581	0.611	0.592	0.369	3.8824e-07
Molecular Function	GO:0070403	7	NAD+ binding	0.103166	P47895	48	0.492	Q1	K	Aldehyde dehydrogenase family 1 member A3 OS=Homo sapiens OX=9606 GN=ALDH1A3 PE=1 SV=2	ALDH1A3	1	0.00157174	86.911	K(1)FATCNPSTR	2	-0.43183	1	1.53	1.442	1.355	0.742	0.696	0.693	0.492	6.4523e-05
Molecular Function	GO:0016830	4	carbon-carbon lyase activity	0.0197957	P04075	140	0.462	Q1	K	Fructose-bisphosphate aldolase A OS=Homo sapiens OX=9606 GN=ALDOA PE=1 SV=2	ALDOA	1	0.0246193	73.499	K(1)DGADFAK	3	0.18494	2	1.579	1.444	1.418	0.69	0.684	0.679	0.462	0.00189588
Molecular Function	GO:0016830	4	carbon-carbon lyase activity	0.0197957	P48163	422	0.439	Q1	K	NADP-dependent malic enzyme OS=Homo sapiens OX=9606 GN=ME1 PE=1 SV=1	ME1	1	2.51763e-07	113.69	AECSAEQCYK(1)ITK	2	-0.067613	2	1.516	1.5	1.514	0.672	0.603	0.712	0.439	0.0034753
Molecular Function	GO:0016830	4	carbon-carbon lyase activity	0.0197957	Q8NBZ7	235	0.369	Q1	K	UDP-glucuronic acid decarboxylase 1 OS=Homo sapiens OX=9606 GN=UXS1 PE=1 SV=1	UXS1	1	0.0220714	76.605	ACYDEGK(1)R	2	-1.2846	1	1.648	1.606	1.582	0.581	0.611	0.592	0.369	3.8824e-07
Molecular Function	GO:0016830	4	carbon-carbon lyase activity	0.0197957	P24752	174	0.297	Q1	K	Acetyl-CoA acetyltransferase, mitochondrial OS=Homo sapiens OX=9606 GN=ACAT1 PE=1 SV=1	ACAT1	1	0.000149298	75.018	GSTPYGGVK(1)LEDLIVK	3	0.042257	1	1.807	1.635	1.755	0.54	0.495	0.509	0.297	3.2579e-06
Molecular Function	GO:0016830	4	carbon-carbon lyase activity	0.0197957	P30046	21	0.347	Q1	K	D-dopachrome decarboxylase OS=Homo sapiens OX=9606 GN=DDT PE=1 SV=3	DDT	1	0.0134101	82.452	VPAGLEK(1)R	2	1.0636	1	1.669	1.629	1.648	0.641	0.566	0.507	0.347	0.0040648
Molecular Function	GO:0016830	4	carbon-carbon lyase activity	0.0197957	P35914	137	0.498	Q1	K	Hydroxymethylglutaryl-CoA lyase, mitochondrial OS=Homo sapiens OX=9606 GN=HMGCL PE=1 SV=2	HMGCL	1	1.48048e-28	176.83	K(1)NINCSIEESFQR	3	0.46393	3	1.382	1.441	1.469	0.652	0.7	0.787	0.498	0.00026353
Molecular Function	GO:0004862	8	cAMP-dependent protein kinase inhibitor activity	0.00303334	P10644	367	0.327	Q1	K	cAMP-dependent protein kinase type I-alpha regulatory subunit OS=Homo sapiens OX=9606 GN=PRKAR1A PE=1 SV=1	PRKAR1A	1	6.36671e-05	106.67	VLGPCSDILK(1)R	2	-0.67679	1	1.637	1.64	1.76	0.573	0.538	0.536	0.327	2.0587e-06
Molecular Function	GO:0004862	8	cAMP-dependent protein kinase inhibitor activity	0.00303334	P13861	379	0.477	Q1	K	cAMP-dependent protein kinase type II-alpha regulatory subunit OS=Homo sapiens OX=9606 GN=PRKAR2A PE=1 SV=2	PRKAR2A	1	0.00222902	71.03	LLGPCMDIMK(1)R	3	-0.51879	2	1.403	1.491	1.483	0.719	0.659	0.711	0.477	2.2538e-05
Molecular Function	GO:0004862	8	cAMP-dependent protein kinase inhibitor activity	0.00303334	Q9UD71	152	0.452	Q1	K	Protein phosphatase 1 regulatory subunit 1B OS=Homo sapiens OX=9606 GN=PPP1R1B PE=1 SV=2	PPP1R1B	1	4.97004e-20	100.86	QSAGQK(1)TTCGQGLEGPWERPPPLDESER	3	-0.61595	2	1.578	1.531	1.369	0.662	0.628	0.736	0.452	0.00023867
Molecular Function	GO:0000146	9	microfilament motor activity	0.155835	P35579	180	0.355	Q1	K	Myosin-9 OS=Homo sapiens OX=9606 GN=MYH9 PE=1 SV=4	MYH9	1	5.30441e-22	143.04	EDQSILCTGESGAGK(1)TENTK	3	-0.56027	1	1.567	1.76	1.57	0.594	0.577	0.566	0.355	1.72257e-05
Molecular Function	GO:0000146	9	microfilament motor activity	0.155835	P35579	565	0.403	Q1	K	Myosin-9 OS=Homo sapiens OX=9606 GN=MYH9 PE=1 SV=4	MYH9	1	0.00243053	54.898	DK(1)ADFCIIHYAGK	3	-0.65742	1	1.575	1.478	1.63	0.589	0.674	0.622	0.403	4.3735e-05
Molecular Function	GO:0000146	9	microfilament motor activity	0.155835	Q9UM54	240	0.316	Q1	K	Unconventional myosin-VI OS=Homo sapiens OX=9606 GN=MYO6 PE=1 SV=4	MYO6	1	0.0165223	70.056	ICVQGK(1)EER	2	-0.27571	1	1.747	1.741	1.607	0.539	0.568	0.505	0.316	1.61137e-05
Molecular Function	GO:0000146	9	microfilament motor activity	0.155835	Q9UM54	325	0.466	Q1	K	Unconventional myosin-VI OS=Homo sapiens OX=9606 GN=MYO6 PE=1 SV=4	MYO6	1	0.0271518	81.296	MCTAMK(1)K	2	-0.14267	1	1.465	1.483	1.477	0.704	0.711	0.646	0.466	0.00160093
Molecular Function	GO:0046912	5	transferase activity, transferring acyl groups, acyl groups converted into alkyl on transfer	0.0108243	Q01581	239	0.441	Q1	K	Hydroxymethylglutaryl-CoA synthase, cytoplasmic OS=Homo sapiens OX=9606 GN=HMGCS1 PE=1 SV=2	HMGCS1	1	0.00927854	73.665	K(1)IHAQWQK	3	1.6118	1	1.512	1.486	1.52	0.636	0.684	0.674	0.441	1.9395e-06
Molecular Function	GO:0046912	5	transferase activity, transferring acyl groups, acyl groups converted into alkyl on transfer	0.0108243	Q01581	409	0.372	Q1	K	Hydroxymethylglutaryl-CoA synthase, cytoplasmic OS=Homo sapiens OX=9606 GN=HMGCS1 PE=1 SV=2	HMGCS1	1	1.88095e-06	130.1	ITASLCDLK(1)SR	3	-0.19613	2	1.635	1.652	1.534	0.555	0.713	0.525	0.372	0.00050154
Molecular Function	GO:0046912	5	transferase activity, transferring acyl groups, acyl groups converted into alkyl on transfer	0.0108243	P54868	310	0.49	Q1	K	Hydroxymethylglutaryl-CoA synthase, mitochondrial OS=Homo sapiens OX=9606 GN=HMGCS2 PE=1 SV=1	HMGCS2	1	0.0108676	85.744	MVQK(1)SLAR	2	-1.7814	1	1.406	1.493	1.427	0.645	0.72	0.754	0.49	0.000137702
Molecular Function	GO:0046912	5	transferase activity, transferring acyl groups, acyl groups converted into alkyl on transfer	0.0108243	P53396	630	0.343	Q1	K	ATP-citrate synthase OS=Homo sapiens OX=9606 GN=ACLY PE=1 SV=3	ACLY	1	1.34053e-06	87.088	GVTIIGPATVGGIK(1)PGCFK	3	0.10544	1	1.69	1.666	1.604	0.553	0.597	0.549	0.343	2.0904e-06
Molecular Function	GO:0016741	4	transferase activity, transferring one-carbon groups	0.0399514	Q08J23	95	0.49	Q1	K	RNA cytosine C(5)-methyltransferase NSUN2 OS=Homo sapiens OX=9606 GN=NSUN2 PE=1 SV=2	NSUN2	1	3.66672e-08	147.2	EILHCLK(1)NK	2	-0.40224	2	1.449	1.458	1.423	0.715	0.702	0.706	0.49	7.9158e-08
Molecular Function	GO:0016741	4	transferase activity, transferring one-carbon groups	0.0399514	P26358	1004	0.462	Q1	K	DNA (cytosine-5)-methyltransferase 1 OS=Homo sapiens OX=9606 GN=DNMT1 PE=1 SV=2	DNMT1	1	0.00280758	68.972	K(1)SNGRPNETDIK	3	-1.3658	1	1.492	1.447	1.501	0.685	0.719	0.646	0.462	1.97721e-05
Molecular Function	GO:0016741	4	transferase activity, transferring one-carbon groups	0.0399514	P22087	102	0.431	Q1	K	rRNA 2'-O-methyltransferase fibrillarin OS=Homo sapiens OX=9606 GN=FBL PE=1 SV=2	FBL	1	0.006593	64.82	GK(1)EDALVTK	3	0.56476	1	1.614	1.463	1.488	0.653	0.625	0.69	0.431	3.7804e-05
Molecular Function	GO:0016741	4	transferase activity, transferring one-carbon groups	0.0399514	P61964	159	0.483	Q1	K	WD repeat-containing protein 5 OS=Homo sapiens OX=9606 GN=WDR5 PE=1 SV=1	WDR5	1	0.0091824	88.495	IWDVK(1)TGK	3	0.80805	2	1.444	1.439	1.473	0.691	0.714	0.7	0.483	2.2067e-07
Molecular Function	GO:0016741	4	transferase activity, transferring one-carbon groups	0.0399514	Q8NEZ4	758	0.436	Q1	K	Histone-lysine N-methyltransferase 2C OS=Homo sapiens OX=9606 GN=KMT2C PE=1 SV=3	KMT2C	1	1.59482e-15	166.6	DVSYQGGK(1)SIK	2	-0.421	2	1.508	1.513	1.523	0.677	0.667	0.635	0.436	0.00055665
Molecular Function	GO:0016741	4	transferase activity, transferring one-carbon groups	0.0399514	P22102	162	0.427	Q1	K	Trifunctional purine biosynthetic protein adenosine-3 OS=Homo sapiens OX=9606 GN=GART PE=1 SV=1	GART	1	0.00700052	87.476	GVIVAK(1)SK	2	-0.25976	2	1.559	1.531	1.49	0.669	0.664	0.624	0.427	2.4813e-06
Molecular Function	GO:0016741	4	transferase activity, transferring one-carbon groups	0.0399514	P22102	164	0.214	Q1	K	Trifunctional purine biosynthetic protein adenosine-3 OS=Homo sapiens OX=9606 GN=GART PE=1 SV=1	GART	1	0.00633056	105.52	SK(1)EEACK	2	-0.90208	1	1.917	1.882	1.877	0.398	0.392	0.426	0.214	2.5844e-07
Molecular Function	GO:0016741	4	transferase activity, transferring one-carbon groups	0.0399514	P50440	55	0.311	Q1	K	Glycine amidinotransferase, mitochondrial OS=Homo sapiens OX=9606 GN=GATM PE=1 SV=1	GATM	1	3.3852e-05	94.203	NSCAADDK(1)ATEPLPK	2	0.013338	2	1.63	1.844	1.642	0.525	0.511	0.553	0.311	1.72561e-05
Molecular Function	GO:0016741	4	transferase activity, transferring one-carbon groups	0.0399514	Q9UMN6	926	0.278	Q1	K	Histone-lysine N-methyltransferase 2B OS=Homo sapiens OX=9606 GN=KMT2B PE=1 SV=1	KMT2B	1	1.13152e-13	91.079	GK(1)VEAAGPGGESEPTGSGGTLAHTPR	3	-0.28959	1	1.528	1.636	2.129	0.557	0.644	0.271	0.278	0.0095622
Molecular Function	GO:0016741	4	transferase activity, transferring one-carbon groups	0.0399514	Q6IPR3	17	0.492	Q1	K	tRNA wybutosine-synthesizing protein 3 homolog OS=Homo sapiens OX=9606 GN=TYW3 PE=2 SV=2	TYW3	1	0.000328411	93.348	AQCLSK(1)ADLSR	2	-0.29869	1	1.435	1.338	1.553	0.751	0.71	0.666	0.492	0.00021641
Molecular Function	GO:0003724	9	RNA helicase activity	0.0399277	Q13838	162	0.422	Q1	K	Spliceosome RNA helicase DDX39B OS=Homo sapiens OX=9606 GN=DDX39B PE=1 SV=1	DDX39B	1	0.0197688	89.827	KDEEVLK(1)K	2	-0.64126	3	1.559	1.602	1.441	0.667	0.628	0.647	0.422	1.92273e-05
Molecular Function	GO:0003724	9	RNA helicase activity	0.0399277	Q13838	241	0.44	Q1	K	Spliceosome RNA helicase DDX39B OS=Homo sapiens OX=9606 GN=DDX39B PE=1 SV=1	DDX39B	1	2.52188e-06	104.2	K(1)FMQDPMEIFVDDETK	3	0.192	1	1.517	1.49	1.519	0.687	0.659	0.647	0.44	8.2451e-07
Molecular Function	GO:0003724	9	RNA helicase activity	0.0399277	Q08211	467	0.496	Q1	K	ATP-dependent RNA helicase A OS=Homo sapiens OX=9606 GN=DHX9 PE=1 SV=4	DHX9	1	5.82684e-13	138.19	GEEPGK(1)SCGYSVR	2	0.64535	1	1.347	1.5	1.457	0.733	0.662	0.74	0.496	0.000123788
Molecular Function	GO:0003724	9	RNA helicase activity	0.0399277	Q9NUU7	343	0.497	Q1	K	ATP-dependent RNA helicase DDX19A OS=Homo sapiens OX=9606 GN=DDX19A PE=1 SV=1	DDX19A	1	6.00522e-10	139.58	K(1)TASWLAAELSK	2	-0.2171	1	1.404	1.445	1.452	0.681	0.735	0.723	0.497	1.52266e-05
Molecular Function	GO:0003724	9	RNA helicase activity	0.0399277	Q9GZR7	17	0.492	Q1	K	ATP-dependent RNA helicase DDX24 OS=Homo sapiens OX=9606 GN=DDX24 PE=1 SV=1	DDX24	1	0.00026351	110.92	QSSCGK(1)FQTK	3	0.27018	2	1.411	1.52	1.394	0.754	0.673	0.7	0.492	7.9084e-05
Molecular Function	GO:0003724	9	RNA helicase activity	0.0399277	Q92900	378	0.213	Q1	K	Regulator of nonsense transcripts 1 OS=Homo sapiens OX=9606 GN=UPF1 PE=1 SV=2	UPF1	1	0.000607611	91.961	YK(1)GDLAPLWK	2	-0.82536	3	1.986	1.884	1.816	0.381	0.438	0.394	0.213	3.1039e-06
Molecular Function	GO:0003724	9	RNA helicase activity	0.0399277	Q92499	234	0.498	Q1	K	ATP-dependent RNA helicase DDX1 OS=Homo sapiens OX=9606 GN=DDX1 PE=1 SV=2	DDX1	1	9.11479e-13	128.71	NQALFPACVLK(1)NAELK	3	0.095706	3	1.391	1.44	1.473	0.764	0.684	0.694	0.498	5.7082e-05
Molecular Function	GO:0003724	9	RNA helicase activity	0.0399277	P17844	197	0.252	Q1	K	Probable ATP-dependent RNA helicase DDX5 OS=Homo sapiens OX=9606 GN=DDX5 PE=1 SV=1	DDX5	1	7.68943e-05	102.9	LK(1)STCIYGGAPK	3	-1.9744	2	1.857	1.777	1.81	0.443	0.473	0.458	0.252	2.2599e-07
Molecular Function	GO:0003724	9	RNA helicase activity	0.0399277	P17844	351	0.391	Q1	K	Probable ATP-dependent RNA helicase DDX5 OS=Homo sapiens OX=9606 GN=DDX5 PE=1 SV=1	DDX5	1	0.00120581	112.36	TIVFVETK(1)R	2	-0.61373	2	1.629	1.536	1.571	0.611	0.645	0.596	0.391	2.686e-06
Molecular Function	GO:0003724	9	RNA helicase activity	0.0399277	O43143	754	0.226	Q1	K	Pre-mRNA-splicing factor ATP-dependent RNA helicase DHX15 OS=Homo sapiens OX=9606 GN=DHX15 PE=1 SV=2	DHX15	1	1.67223e-05	106.32	TCTDIK(1)PEWLVK	3	0.85098	2	1.857	1.853	1.89	0.41	0.462	0.396	0.226	0.00100058
Molecular Function	GO:0017166	5	vinculin binding	0.00193141	Q9Y3I0	492	0.44	Q1	K	tRNA-splicing ligase RtcB homolog OS=Homo sapiens OX=9606 GN=RTCB PE=1 SV=1	RTCB	1	5.61267e-20	143.46	NVTDVVNTCHDAGISK(1)K	3	0.34213	1	1.513	1.461	1.548	0.612	0.7	0.677	0.44	4.3542e-05
Molecular Function	GO:0017166	5	vinculin binding	0.00193141	Q9Y490	2445	0.279	Q1	K	Talin-1 OS=Homo sapiens OX=9606 GN=TLN1 PE=1 SV=3	TLN1	1	2.8004e-05	114.7	VK(1)ADQDSEAMK	2	-0.094946	1	1.709	1.766	1.815	0.526	0.472	0.478	0.279	2.4271e-06
Molecular Function	GO:0017166	5	vinculin binding	0.00193141	P35221	120	0.488	Q1	K	Catenin alpha-1 OS=Homo sapiens OX=9606 GN=CTNNA1 PE=1 SV=1	CTNNA1	1	5.50199e-08	107.82	AAAGEFADDPCSSVK(1)R	2	-0.12176	1	1.365	1.42	1.547	0.7	0.659	0.755	0.488	0.000182432
Molecular Function	GO:0017166	5	vinculin binding	0.00193141	O60504	486	0.36	Q1	K	Vinexin OS=Homo sapiens OX=9606 GN=SORBS3 PE=1 SV=2	SORBS3	1	0.0003411	104.59	K(1)VNENWYEGR	2	-0.48362	1	1.555	1.614	1.702	0.592	0.598	0.565	0.36	2.7089e-06
Molecular Function	GO:0003746	7	translation elongation factor activity	0.030095	Q9GZV4	27	0.482	Q1	K	Eukaryotic translation initiation factor 5A-2 OS=Homo sapiens OX=9606 GN=EIF5A2 PE=1 SV=3	EIF5A2	1	0.033182	76.064	K(1)NGFVVLK	3	-0.01779	2	1.424	1.491	1.449	0.743	0.761	0.599	0.482	0.00068034
Molecular Function	GO:0003746	7	translation elongation factor activity	0.030095	Q9GZV4	34	0.247	Q1	K	Eukaryotic translation initiation factor 5A-2 OS=Homo sapiens OX=9606 GN=EIF5A2 PE=1 SV=3	EIF5A2	1	0.000289488	93.096	KNGFVVLK(1)GR	3	0.33973	4	1.911	1.741	1.829	0.459	0.442	0.452	0.247	5.5759e-07
Molecular Function	GO:0003746	7	translation elongation factor activity	0.030095	P13639	571	0.45	Q1	K	Elongation factor 2 OS=Homo sapiens OX=9606 GN=EEF2 PE=1 SV=4	EEF2	1	3.14699e-17	154.28	DLEEDHACIPIK(1)K	2	-0.69618	3	1.467	1.535	1.479	0.652	0.65	0.715	0.45	1.99925e-05
Molecular Function	GO:0003746	7	translation elongation factor activity	0.030095	P13639	594	0.491	Q1	K	Elongation factor 2 OS=Homo sapiens OX=9606 GN=EEF2 PE=1 SV=4	EEF2	1	1.69803e-09	110.12	ETVSEESNVLCLSK(1)SPNK	3	-0.52971	1	1.437	1.587	1.307	0.754	0.662	0.709	0.491	0.00046028
Molecular Function	GO:0003746	7	translation elongation factor activity	0.030095	Q5VTE0	376	0.352	Q1	K	Putative elongation factor 1-alpha-like 3 OS=Homo sapiens OX=9606 GN=EEF1A1P5 PE=5 SV=1	EEF1A1P5	1	0.0336053	78.113	FAELK(1)EK	2	-0.6028	1	1.692	1.634	1.59	0.574	0.573	0.584	0.352	3.2826e-07
Molecular Function	GO:0003746	7	translation elongation factor activity	0.030095	Q96RP9	520	0.177	Q1	K	Elongation factor G, mitochondrial OS=Homo sapiens OX=9606 GN=GFM1 PE=1 SV=2	GFM1	1	0.00172824	80.312	EYGCPCITGK(1)PK	2	-0.20738	2	2.037	1.995	1.897	0.327	0.351	0.37	0.177	9.8724e-07
Molecular Function	GO:0001786	6	phosphatidylserine binding	0.103166	P09429	50	0.498	Q1	K	High mobility group protein B1 OS=Homo sapiens OX=9606 GN=HMGB1 PE=1 SV=3	HMGB1	1	0.0185525	64.567	WK(1)TMSAK	3	-0.52405	1	1.515	1.361	1.429	0.766	0.686	0.694	0.498	0.000119089
Molecular Function	GO:0001786	6	phosphatidylserine binding	0.103166	Q9BZF1	723	0.308	Q1	K	Oxysterol-binding protein-related protein 8 OS=Homo sapiens OX=9606 GN=OSBPL8 PE=1 SV=3	OSBPL8	1	0.00193928	91.961	TK(1)NEEWSCK	2	-0.38205	1	1.813	1.677	1.649	0.554	0.493	0.537	0.308	1.66199e-05
Molecular Function	GO:0004029	6	aldehyde dehydrogenase (NAD) activity	0.130308	P11766	107	0.231	Q1	K	Alcohol dehydrogenase class-3 OS=Homo sapiens OX=9606 GN=ADH5 PE=1 SV=4	ADH5	1	1.45045e-06	115.57	FCLNPK(1)TNLCQK	2	0.14803	1	2	1.774	1.804	0.398	0.407	0.482	0.231	3.6245e-05
Molecular Function	GO:0004029	6	aldehyde dehydrogenase (NAD) activity	0.130308	P05091	52	0.475	Q1	K	Aldehyde dehydrogenase, mitochondrial OS=Homo sapiens OX=9606 GN=ALDH2 PE=1 SV=2	ALDH2	1	1.86737e-16	95.646	K(1)TFPTVNPSTGEVICQVAEGDKEDVDK	4	-0.54916	1	1.456	1.43	1.497	0.65	0.681	0.75	0.475	7.6005e-05
Molecular Function	GO:0004029	6	aldehyde dehydrogenase (NAD) activity	0.130308	P47895	48	0.492	Q1	K	Aldehyde dehydrogenase family 1 member A3 OS=Homo sapiens OX=9606 GN=ALDH1A3 PE=1 SV=2	ALDH1A3	1	0.00157174	86.911	K(1)FATCNPSTR	2	-0.43183	1	1.53	1.442	1.355	0.742	0.696	0.693	0.492	6.4523e-05
Molecular Function	GO:0030911	5	TPR domain binding	0.0210207	P08238	559	0.479	Q1	K	Heat shock protein HSP 90-beta OS=Homo sapiens OX=9606 GN=HSP90AB1 PE=1 SV=4	HSP90AB1	1	0.00072324	111.17	AK(1)FENLCK	3	-0.027707	2	1.508	1.469	1.398	0.714	0.677	0.704	0.479	1.56421e-05
Molecular Function	GO:0030911	5	TPR domain binding	0.0210207	P08238	568	0.153	Q1	K	Heat shock protein HSP 90-beta OS=Homo sapiens OX=9606 GN=HSP90AB1 PE=1 SV=4	HSP90AB1	1	0.0129056	82.417	LMK(1)EILDK	2	-0.52759	1	2.117	2.005	1.986	0.335	0.306	0.291	0.153	1.0451e-06
Molecular Function	GO:0030911	5	TPR domain binding	0.0210207	P07900	576	0.235	Q1	K	Heat shock protein HSP 90-alpha OS=Homo sapiens OX=9606 GN=HSP90AA1 PE=1 SV=5	HSP90AA1	1	0.00316475	93.096	IMK(1)DILEK	3	0.51489	4	1.881	1.876	1.791	0.418	0.456	0.43	0.235	5.6281e-07
Molecular Function	GO:0036442	14	hydrogen-exporting ATPase activity	0.155835	P38606	132	0.405	Q1	K	V-type proton ATPase catalytic subunit A OS=Homo sapiens OX=9606 GN=ATP6V1A PE=1 SV=2	ATP6V1A	1	0.000353207	107.09	DIK(1)WDFTPCK	2	-0.13164	2	1.639	1.537	1.502	0.652	0.641	0.6	0.405	1.77762e-05
Molecular Function	GO:0036442	14	hydrogen-exporting ATPase activity	0.155835	P21281	109	0.48	Q1	K	V-type proton ATPase subunit B, brain isoform OS=Homo sapiens OX=9606 GN=ATP6V1B2 PE=1 SV=3	ATP6V1B2	1	0.000924525	87.718	K(1)TSCEFTGDILR	3	-0.37516	3	1.482	1.45	1.439	0.716	0.687	0.694	0.48	5.5611e-07
Molecular Function	GO:0004004	11	ATP-dependent RNA helicase activity	0.0399277	Q13838	162	0.422	Q1	K	Spliceosome RNA helicase DDX39B OS=Homo sapiens OX=9606 GN=DDX39B PE=1 SV=1	DDX39B	1	0.0197688	89.827	KDEEVLK(1)K	2	-0.64126	3	1.559	1.602	1.441	0.667	0.628	0.647	0.422	1.92273e-05
Molecular Function	GO:0004004	11	ATP-dependent RNA helicase activity	0.0399277	Q13838	241	0.44	Q1	K	Spliceosome RNA helicase DDX39B OS=Homo sapiens OX=9606 GN=DDX39B PE=1 SV=1	DDX39B	1	2.52188e-06	104.2	K(1)FMQDPMEIFVDDETK	3	0.192	1	1.517	1.49	1.519	0.687	0.659	0.647	0.44	8.2451e-07
Molecular Function	GO:0004004	11	ATP-dependent RNA helicase activity	0.0399277	Q08211	467	0.496	Q1	K	ATP-dependent RNA helicase A OS=Homo sapiens OX=9606 GN=DHX9 PE=1 SV=4	DHX9	1	5.82684e-13	138.19	GEEPGK(1)SCGYSVR	2	0.64535	1	1.347	1.5	1.457	0.733	0.662	0.74	0.496	0.000123788
Molecular Function	GO:0004004	11	ATP-dependent RNA helicase activity	0.0399277	Q9NUU7	343	0.497	Q1	K	ATP-dependent RNA helicase DDX19A OS=Homo sapiens OX=9606 GN=DDX19A PE=1 SV=1	DDX19A	1	6.00522e-10	139.58	K(1)TASWLAAELSK	2	-0.2171	1	1.404	1.445	1.452	0.681	0.735	0.723	0.497	1.52266e-05
Molecular Function	GO:0004004	11	ATP-dependent RNA helicase activity	0.0399277	Q9GZR7	17	0.492	Q1	K	ATP-dependent RNA helicase DDX24 OS=Homo sapiens OX=9606 GN=DDX24 PE=1 SV=1	DDX24	1	0.00026351	110.92	QSSCGK(1)FQTK	3	0.27018	2	1.411	1.52	1.394	0.754	0.673	0.7	0.492	7.9084e-05
Molecular Function	GO:0004004	11	ATP-dependent RNA helicase activity	0.0399277	Q92900	378	0.213	Q1	K	Regulator of nonsense transcripts 1 OS=Homo sapiens OX=9606 GN=UPF1 PE=1 SV=2	UPF1	1	0.000607611	91.961	YK(1)GDLAPLWK	2	-0.82536	3	1.986	1.884	1.816	0.381	0.438	0.394	0.213	3.1039e-06
Molecular Function	GO:0004004	11	ATP-dependent RNA helicase activity	0.0399277	Q92499	234	0.498	Q1	K	ATP-dependent RNA helicase DDX1 OS=Homo sapiens OX=9606 GN=DDX1 PE=1 SV=2	DDX1	1	9.11479e-13	128.71	NQALFPACVLK(1)NAELK	3	0.095706	3	1.391	1.44	1.473	0.764	0.684	0.694	0.498	5.7082e-05
Molecular Function	GO:0004004	11	ATP-dependent RNA helicase activity	0.0399277	P17844	197	0.252	Q1	K	Probable ATP-dependent RNA helicase DDX5 OS=Homo sapiens OX=9606 GN=DDX5 PE=1 SV=1	DDX5	1	7.68943e-05	102.9	LK(1)STCIYGGAPK	3	-1.9744	2	1.857	1.777	1.81	0.443	0.473	0.458	0.252	2.2599e-07
Molecular Function	GO:0004004	11	ATP-dependent RNA helicase activity	0.0399277	P17844	351	0.391	Q1	K	Probable ATP-dependent RNA helicase DDX5 OS=Homo sapiens OX=9606 GN=DDX5 PE=1 SV=1	DDX5	1	0.00120581	112.36	TIVFVETK(1)R	2	-0.61373	2	1.629	1.536	1.571	0.611	0.645	0.596	0.391	2.686e-06
Molecular Function	GO:0004004	11	ATP-dependent RNA helicase activity	0.0399277	O43143	754	0.226	Q1	K	Pre-mRNA-splicing factor ATP-dependent RNA helicase DHX15 OS=Homo sapiens OX=9606 GN=DHX15 PE=1 SV=2	DHX15	1	1.67223e-05	106.32	TCTDIK(1)PEWLVK	3	0.85098	2	1.857	1.853	1.89	0.41	0.462	0.396	0.226	0.00100058
Molecular Function	GO:0043008	4	ATP-dependent protein binding	0.0210207	Q9UBE0	148	0.414	Q1	K	SUMO-activating enzyme subunit 1 OS=Homo sapiens OX=9606 GN=SAE1 PE=1 SV=1	SAE1	1	0.00382454	62.088	VDQICHK(1)NSIK	3	0.26612	1	1.488	1.47	1.678	0.727	0.623	0.57	0.414	0.00043594
Molecular Function	GO:0043008	4	ATP-dependent protein binding	0.0210207	Q13838	162	0.422	Q1	K	Spliceosome RNA helicase DDX39B OS=Homo sapiens OX=9606 GN=DDX39B PE=1 SV=1	DDX39B	1	0.0197688	89.827	KDEEVLK(1)K	2	-0.64126	3	1.559	1.602	1.441	0.667	0.628	0.647	0.422	1.92273e-05
Molecular Function	GO:0043008	4	ATP-dependent protein binding	0.0210207	Q13838	241	0.44	Q1	K	Spliceosome RNA helicase DDX39B OS=Homo sapiens OX=9606 GN=DDX39B PE=1 SV=1	DDX39B	1	2.52188e-06	104.2	K(1)FMQDPMEIFVDDETK	3	0.192	1	1.517	1.49	1.519	0.687	0.659	0.647	0.44	8.2451e-07
Molecular Function	GO:0044877	3	macromolecular complex binding	0.0031424	Q7L576	516	0.465	Q1	K	Cytoplasmic FMR1-interacting protein 1 OS=Homo sapiens OX=9606 GN=CYFIP1 PE=1 SV=1	CYFIP1	1	2.47216e-06	84.107	K(1)TVCDWETGHEPFNDPALR	3	0.46049	1	1.526	1.529	1.372	0.613	0.778	0.666	0.465	0.00060253
Molecular Function	GO:0044877	3	macromolecular complex binding	0.0031424	Q5SSJ5	365	0.363	Q1	K	Heterochromatin protein 1-binding protein 3 OS=Homo sapiens OX=9606 GN=HP1BP3 PE=1 SV=1	HP1BP3	1	0.00080643	119.53	TCSTTALK(1)K	2	-0.20534	1	1.624	1.614	1.624	0.608	0.554	0.603	0.363	0.00086097
Molecular Function	GO:0044877	3	macromolecular complex binding	0.0031424	P18206	316	0.374	Q1	K	Vinculin OS=Homo sapiens OX=9606 GN=VCL PE=1 SV=4	VCL	1	0.0100094	72.34	VGELCAGK(1)ER	2	-1.6995	1	1.722	1.618	1.478	0.627	0.582	0.593	0.374	3.9318e-05
Molecular Function	GO:0044877	3	macromolecular complex binding	0.0031424	Q92614	1429	0.474	Q1	K	Unconventional myosin-XVIIIa OS=Homo sapiens OX=9606 GN=MYO18A PE=1 SV=3	MYO18A	1	0.000436442	127.84	ALQQLK(1)K	2	0.50423	1	1.45	1.472	1.466	0.671	0.71	0.7	0.474	9.1511e-07
Molecular Function	GO:0044877	3	macromolecular complex binding	0.0031424	P84243	37	0.422	Q1	K	Histone H3.3 OS=Homo sapiens OX=9606 GN=H3-3A PE=1 SV=2	H3-3A	1	0.000237623	93.623	K(1)SAPSTGGVK(1)K	2	-0.62162	5	1.579	1.45	1.573	0.637	0.664	0.641	0.422	4.7532e-06
Molecular Function	GO:0044877	3	macromolecular complex binding	0.0031424	P09234	22	0.257	Q1	K	U1 small nuclear ribonucleoprotein C OS=Homo sapiens OX=9606 GN=SNRPC PE=1 SV=1	SNRPC	1	0.00671323	88.921	K(1)THCSGR	2	-0.90683	2	1.814	1.775	1.824	0.441	0.469	0.482	0.257	5.074e-07
Molecular Function	GO:0044877	3	macromolecular complex binding	0.0031424	P47756	57	0.424	Q1	K	F-actin-capping protein subunit beta OS=Homo sapiens OX=9606 GN=CAPZB PE=1 SV=4	CAPZB	1	9.4043e-13	133.47	VVGK(1)DYLLCDYNR	3	-1.9206	2	1.509	1.551	1.529	0.644	0.679	0.623	0.424	2.622e-06
Molecular Function	GO:0044877	3	macromolecular complex binding	0.0031424	Q9UM54	240	0.316	Q1	K	Unconventional myosin-VI OS=Homo sapiens OX=9606 GN=MYO6 PE=1 SV=4	MYO6	1	0.0165223	70.056	ICVQGK(1)EER	2	-0.27571	1	1.747	1.741	1.607	0.539	0.568	0.505	0.316	1.61137e-05
Molecular Function	GO:0044877	3	macromolecular complex binding	0.0031424	Q9UM54	325	0.466	Q1	K	Unconventional myosin-VI OS=Homo sapiens OX=9606 GN=MYO6 PE=1 SV=4	MYO6	1	0.0271518	81.296	MCTAMK(1)K	2	-0.14267	1	1.465	1.483	1.477	0.704	0.711	0.646	0.466	0.00160093
Molecular Function	GO:0044877	3	macromolecular complex binding	0.0031424	P62826	123	0.484	Q1	K	GTP-binding nuclear protein Ran OS=Homo sapiens OX=9606 GN=RAN PE=1 SV=3	RAN	1	1.12796e-19	139.29	VCENIPIVLCGNK(1)VDIK	3	-0.81793	3	1.435	1.493	1.423	0.688	0.703	0.715	0.484	1.2707e-06
Molecular Function	GO:0044877	3	macromolecular complex binding	0.0031424	Q9UQE7	977	0.44	Q1	K	Structural maintenance of chromosomes protein 3 OS=Homo sapiens OX=9606 GN=SMC3 PE=1 SV=2	SMC3	0.99997	0.0237068	46.88	KLEQCNTELK(1)K	3	1.6771	1	1.475	1.481	1.565	0.661	0.655	0.674	0.44	1.2541e-06
Molecular Function	GO:0044877	3	macromolecular complex binding	0.0031424	Q13838	162	0.422	Q1	K	Spliceosome RNA helicase DDX39B OS=Homo sapiens OX=9606 GN=DDX39B PE=1 SV=1	DDX39B	1	0.0197688	89.827	KDEEVLK(1)K	2	-0.64126	3	1.559	1.602	1.441	0.667	0.628	0.647	0.422	1.92273e-05
Molecular Function	GO:0044877	3	macromolecular complex binding	0.0031424	Q13838	241	0.44	Q1	K	Spliceosome RNA helicase DDX39B OS=Homo sapiens OX=9606 GN=DDX39B PE=1 SV=1	DDX39B	1	2.52188e-06	104.2	K(1)FMQDPMEIFVDDETK	3	0.192	1	1.517	1.49	1.519	0.687	0.659	0.647	0.44	8.2451e-07
Molecular Function	GO:0044877	3	macromolecular complex binding	0.0031424	O75367	304	0.372	Q1	K	Core histone macro-H2A.1 OS=Homo sapiens OX=9606 GN=H2AFY PE=1 SV=4	H2AFY	1	0.000144859	116.24	NCLALADDK(1)K	2	0.39339	2	1.634	1.692	1.494	0.556	0.613	0.622	0.372	4.0974e-05
Molecular Function	GO:0044877	3	macromolecular complex binding	0.0031424	Q9GZV4	27	0.482	Q1	K	Eukaryotic translation initiation factor 5A-2 OS=Homo sapiens OX=9606 GN=EIF5A2 PE=1 SV=3	EIF5A2	1	0.033182	76.064	K(1)NGFVVLK	3	-0.01779	2	1.424	1.491	1.449	0.743	0.761	0.599	0.482	0.00068034
Molecular Function	GO:0044877	3	macromolecular complex binding	0.0031424	Q9GZV4	34	0.247	Q1	K	Eukaryotic translation initiation factor 5A-2 OS=Homo sapiens OX=9606 GN=EIF5A2 PE=1 SV=3	EIF5A2	1	0.000289488	93.096	KNGFVVLK(1)GR	3	0.33973	4	1.911	1.741	1.829	0.459	0.442	0.452	0.247	5.5759e-07
Molecular Function	GO:0044877	3	macromolecular complex binding	0.0031424	P13639	571	0.45	Q1	K	Elongation factor 2 OS=Homo sapiens OX=9606 GN=EEF2 PE=1 SV=4	EEF2	1	3.14699e-17	154.28	DLEEDHACIPIK(1)K	2	-0.69618	3	1.467	1.535	1.479	0.652	0.65	0.715	0.45	1.99925e-05
Molecular Function	GO:0044877	3	macromolecular complex binding	0.0031424	P13639	594	0.491	Q1	K	Elongation factor 2 OS=Homo sapiens OX=9606 GN=EEF2 PE=1 SV=4	EEF2	1	1.69803e-09	110.12	ETVSEESNVLCLSK(1)SPNK	3	-0.52971	1	1.437	1.587	1.307	0.754	0.662	0.709	0.491	0.00046028
Molecular Function	GO:0044877	3	macromolecular complex binding	0.0031424	P23528	45	0.342	Q1	K	Cofilin-1 OS=Homo sapiens OX=9606 GN=CFL1 PE=1 SV=3	CFL1	1	0.00127427	101.39	K(1)NIILEEGK	2	0.23308	5	1.734	1.655	1.576	0.555	0.587	0.557	0.342	2.6776e-06
Molecular Function	GO:0044877	3	macromolecular complex binding	0.0031424	P23528	44	0.401	Q1	K	Cofilin-1 OS=Homo sapiens OX=9606 GN=CFL1 PE=1 SV=3	CFL1	1	4.72599e-11	153.95	AVLFCLSEDK(1)K	2	-0.65835	3	1.595	1.575	1.523	0.642	0.654	0.585	0.401	1.80522e-05
Molecular Function	GO:0044877	3	macromolecular complex binding	0.0031424	P35579	180	0.355	Q1	K	Myosin-9 OS=Homo sapiens OX=9606 GN=MYH9 PE=1 SV=4	MYH9	1	5.30441e-22	143.04	EDQSILCTGESGAGK(1)TENTK	3	-0.56027	1	1.567	1.76	1.57	0.594	0.577	0.566	0.355	1.72257e-05
Molecular Function	GO:0044877	3	macromolecular complex binding	0.0031424	P35579	565	0.403	Q1	K	Myosin-9 OS=Homo sapiens OX=9606 GN=MYH9 PE=1 SV=4	MYH9	1	0.00243053	54.898	DK(1)ADFCIIHYAGK	3	-0.65742	1	1.575	1.478	1.63	0.589	0.674	0.622	0.403	4.3735e-05
Molecular Function	GO:0044877	3	macromolecular complex binding	0.0031424	P50570	90	0.247	Q1	K	Dynamin-2 OS=Homo sapiens OX=9606 GN=DNM2 PE=1 SV=2	DNM2	1	0.007979	78.342	K(1)FTDFDEVR	2	-0.55845	1	1.768	1.787	1.917	0.504	0.415	0.435	0.247	2.2772e-05
Molecular Function	GO:0044877	3	macromolecular complex binding	0.0031424	P50454	160	0.454	Q1	K	Serpin H1 OS=Homo sapiens OX=9606 GN=SERPINH1 PE=1 SV=2	SERPINH1	1	4.32455e-11	129.17	QHYNCEHSK(1)INFR	3	0.55646	2	1.446	1.567	1.452	0.654	0.712	0.663	0.454	2.4472e-05
Molecular Function	GO:0044877	3	macromolecular complex binding	0.0031424	P51970	38	0.266	Q1	K	NADH dehydrogenase [ubiquinone] 1 alpha subcomplex subunit 8 OS=Homo sapiens OX=9606 GN=NDUFA8 PE=1 SV=3	NDUFA8	1	0.00170306	54.09	AAAHHYGAQCDK(1)PNK	3	-0.081265	3	1.827	1.722	1.816	0.446	0.503	0.476	0.266	2.3488e-06
Molecular Function	GO:0044877	3	macromolecular complex binding	0.0031424	P07237	308	0.278	Q1	K	Protein disulfide-isomerase OS=Homo sapiens OX=9606 GN=P4HB PE=1 SV=3	P4HB	1	0.00332344	86.898	ILEFFGLK(1)K	3	-0.031928	2	1.755	1.698	1.841	0.452	0.513	0.506	0.278	1.51387e-05
Molecular Function	GO:0044877	3	macromolecular complex binding	0.0031424	P07237	309	0.424	Q1	K	Protein disulfide-isomerase OS=Homo sapiens OX=9606 GN=P4HB PE=1 SV=3	P4HB	1	0.00170122	121.64	K(1)EECPAVR	3	0.4143	2	1.6	1.521	1.471	0.613	0.641	0.691	0.424	3.7866e-05
Molecular Function	GO:0044877	3	macromolecular complex binding	0.0031424	P35221	120	0.488	Q1	K	Catenin alpha-1 OS=Homo sapiens OX=9606 GN=CTNNA1 PE=1 SV=1	CTNNA1	1	5.50199e-08	107.82	AAAGEFADDPCSSVK(1)R	2	-0.12176	1	1.365	1.42	1.547	0.7	0.659	0.755	0.488	0.000182432
Molecular Function	GO:0044877	3	macromolecular complex binding	0.0031424	P14618	162	0.464	Q1	K	Pyruvate kinase PKM OS=Homo sapiens OX=9606 GN=PKM PE=1 SV=4	PKM	1	6.49953e-05	90.725	CDENILWLDYK(1)NICK	3	-0.11353	1	1.459	1.39	1.578	0.656	0.756	0.643	0.464	0.00025908
Molecular Function	GO:0044877	3	macromolecular complex binding	0.0031424	P14618	322	0.414	Q1	K	Pyruvate kinase PKM OS=Homo sapiens OX=9606 GN=PKM PE=1 SV=4	PKM	1	4.11221e-09	110.12	AGK(1)PVICATQMLESMIK	3	0.3365	2	1.583	1.521	1.528	0.626	0.629	0.664	0.414	1.32e-06
Molecular Function	GO:0044877	3	macromolecular complex binding	0.0031424	Q9BXJ9	467	0.44	Q1	K	N-alpha-acetyltransferase 15, NatA auxiliary subunit OS=Homo sapiens OX=9606 GN=NAA15 PE=1 SV=1	NAA15	1	8.59677e-08	135.02	EAEEMCSK(1)FTR	2	-1.4602	1	1.458	1.487	1.573	0.609	0.707	0.674	0.44	7.8711e-05
Molecular Function	GO:0044877	3	macromolecular complex binding	0.0031424	Q13576	553	0.379	Q1	K	Ras GTPase-activating-like protein IQGAP2 OS=Homo sapiens OX=9606 GN=IQGAP2 PE=1 SV=4	IQGAP2	1	0.00516444	78.324	K(1)SSDILSVLK	2	-0.62996	1	1.562	1.607	1.618	0.612	0.547	0.655	0.379	5.7146e-05
Molecular Function	GO:0044877	3	macromolecular complex binding	0.0031424	Q13576	273	0.384	Q1	K	Ras GTPase-activating-like protein IQGAP2 OS=Homo sapiens OX=9606 GN=IQGAP2 PE=1 SV=4	IQGAP2	1	0.00160054	85.163	LK(1)NSCISEEER	2	-0.32659	1	1.651	1.654	1.463	0.624	0.568	0.638	0.384	5.9778e-05
Molecular Function	GO:0044877	3	macromolecular complex binding	0.0031424	Q13576	1454	0.478	Q1	K	Ras GTPase-activating-like protein IQGAP2 OS=Homo sapiens OX=9606 GN=IQGAP2 PE=1 SV=4	IQGAP2	1	0.0105865	86.882	TCLDNLK(1)R	2	-0.99215	1	1.5	1.459	1.416	0.707	0.68	0.706	0.478	1.9511e-06
Molecular Function	GO:0044877	3	macromolecular complex binding	0.0031424	P60981	30	0.396	Q1	K	Destrin OS=Homo sapiens OX=9606 GN=DSTN PE=1 SV=3	DSTN	1	0.00172616	93.096	CSTPEEIK(1)K	3	-1.0849	3	1.589	1.587	1.536	0.613	0.602	0.649	0.396	1.6318e-06
Molecular Function	GO:0044877	3	macromolecular complex binding	0.0031424	Q92616	793	0.441	Q1	K	eIF-2-alpha kinase activator GCN1 OS=Homo sapiens OX=9606 GN=GCN1 PE=1 SV=6	GCN1	1	0.0122105	60.91	ANMK(1)RENK	2	-2.2334	1	1.609	1.454	1.461	0.646	0.676	0.673	0.441	2.114e-05
Molecular Function	GO:0044877	3	macromolecular complex binding	0.0031424	P07900	576	0.235	Q1	K	Heat shock protein HSP 90-alpha OS=Homo sapiens OX=9606 GN=HSP90AA1 PE=1 SV=5	HSP90AA1	1	0.00316475	93.096	IMK(1)DILEK	3	0.51489	4	1.881	1.876	1.791	0.418	0.456	0.43	0.235	5.6281e-07
Molecular Function	GO:0044877	3	macromolecular complex binding	0.0031424	Q9Y490	2445	0.279	Q1	K	Talin-1 OS=Homo sapiens OX=9606 GN=TLN1 PE=1 SV=3	TLN1	1	2.8004e-05	114.7	VK(1)ADQDSEAMK	2	-0.094946	1	1.709	1.766	1.815	0.526	0.472	0.478	0.279	2.4271e-06
Molecular Function	GO:0044877	3	macromolecular complex binding	0.0031424	P21333	578	0.272	Q1	K	Filamin-A OS=Homo sapiens OX=9606 GN=FLNA PE=1 SV=4	FLNA	1	0.000120036	101.56	VGTECGNQK(1)VR	2	-0.21816	1	1.73	1.815	1.784	0.486	0.476	0.485	0.272	6.0056e-08
Molecular Function	GO:0044877	3	macromolecular complex binding	0.0031424	P21333	2000	0.359	Q1	K	Filamin-A OS=Homo sapiens OX=9606 GN=FLNA PE=1 SV=4	FLNA	1	0.0408648	66.692	EEPCLLK(1)R	2	-0.50213	1	1.675	1.62	1.586	0.582	0.588	0.583	0.359	1.8799e-07
Molecular Function	GO:0044877	3	macromolecular complex binding	0.0031424	P21333	1450	0.495	Q1	K	Filamin-A OS=Homo sapiens OX=9606 GN=FLNA PE=1 SV=4	FLNA	1	0.00011233	90.793	VPVHDVTDASK(1)VK	3	0.48724	1	1.479	1.441	1.393	0.691	0.679	0.764	0.495	6.2437e-05
Molecular Function	GO:0044877	3	macromolecular complex binding	0.0031424	P63092	8	0.162	Q1	K	Guanine nucleotide-binding protein G(s) subunit alpha isoforms short OS=Homo sapiens OX=9606 GN=GNAS PE=1 SV=1	GNAS	1	0.00017262	97.463	GCLGNSK(1)TEDQR	2	-0.98053	1	2.08	2.045	1.911	0.324	0.323	0.33	0.162	1.3942e-07
Molecular Function	GO:0044877	3	macromolecular complex binding	0.0031424	Q9ULV4	194	0.308	Q1	K	Coronin-1C OS=Homo sapiens OX=9606 GN=CORO1C PE=1 SV=1	CORO1C	1	0.00320052	69.261	NGSLICTASK(1)DK	2	1.4005	2	1.663	1.722	1.748	0.55	0.503	0.528	0.308	1.2137e-06
Molecular Function	GO:0044877	3	macromolecular complex binding	0.0031424	Q9Y3A5	125	0.318	Q1	K	Ribosome maturation protein SBDS OS=Homo sapiens OX=9606 GN=SBDS PE=1 SV=4	SBDS	1	6.05362e-05	138.08	CVNPETK(1)R	2	-2.5384	1	1.73	1.732	1.626	0.554	0.563	0.499	0.318	1.59596e-05
Molecular Function	GO:0044877	3	macromolecular complex binding	0.0031424	Q06124	178	0.256	Q1	K	Tyrosine-protein phosphatase non-receptor type 11 OS=Homo sapiens OX=9606 GN=PTPN11 PE=1 SV=2	PTPN11	1	0.00118893	79.346	CQELK(1)YDVGGGER	2	0.10773	2	1.739	1.852	1.824	0.421	0.505	0.46	0.256	1.83063e-05
Molecular Function	GO:0044877	3	macromolecular complex binding	0.0031424	P17844	197	0.252	Q1	K	Probable ATP-dependent RNA helicase DDX5 OS=Homo sapiens OX=9606 GN=DDX5 PE=1 SV=1	DDX5	1	7.68943e-05	102.9	LK(1)STCIYGGAPK	3	-1.9744	2	1.857	1.777	1.81	0.443	0.473	0.458	0.252	2.2599e-07
Molecular Function	GO:0044877	3	macromolecular complex binding	0.0031424	P17844	351	0.391	Q1	K	Probable ATP-dependent RNA helicase DDX5 OS=Homo sapiens OX=9606 GN=DDX5 PE=1 SV=1	DDX5	1	0.00120581	112.36	TIVFVETK(1)R	2	-0.61373	2	1.629	1.536	1.571	0.611	0.645	0.596	0.391	2.686e-06
Molecular Function	GO:0044877	3	macromolecular complex binding	0.0031424	P40939	60	0.394	Q1	K	Trifunctional enzyme subunit alpha, mitochondrial OS=Homo sapiens OX=9606 GN=HADHA PE=1 SV=2	HADHA	1	0.000326831	92.38	INSPNSK(1)VNTLSK	2	1.332	1	1.576	1.647	1.499	0.632	0.583	0.645	0.394	2.1245e-05
Molecular Function	GO:0044877	3	macromolecular complex binding	0.0031424	P40939	353	0.198	Q1	K	Trifunctional enzyme subunit alpha, mitochondrial OS=Homo sapiens OX=9606 GN=HADHA PE=1 SV=2	HADHA	1	0.00293526	99.442	NK(1)FGAPQK	3	-0.27395	2	2.008	1.903	1.879	0.398	0.379	0.367	0.198	4.0698e-07
Molecular Function	GO:0044877	3	macromolecular complex binding	0.0031424	P40939	644	0.486	Q1	K	Trifunctional enzyme subunit alpha, mitochondrial OS=Homo sapiens OX=9606 GN=HADHA PE=1 SV=2	HADHA	1	4.34993e-05	101.89	GFYIYQEGVK(1)R	2	-1.1374	3	1.474	1.433	1.437	0.671	0.714	0.728	0.486	1.51598e-05
Molecular Function	GO:0044877	3	macromolecular complex binding	0.0031424	P40939	411	0.18	Q1	K	Trifunctional enzyme subunit alpha, mitochondrial OS=Homo sapiens OX=9606 GN=HADHA PE=1 SV=2	HADHA	1	0.0197409	87.476	GLNDK(1)VK	2	-0.16327	1	2.009	2.02	1.874	0.359	0.375	0.331	0.18	1.2788e-06
Molecular Function	GO:0044877	3	macromolecular complex binding	0.0031424	Q8TEQ6	860	0.481	Q1	K	Gem-associated protein 5 OS=Homo sapiens OX=9606 GN=GEMIN5 PE=1 SV=3	GEMIN5	1	1.41616e-06	104.88	SK(1)EELHQDCLVLATAK	3	-0.75026	1	1.465	1.457	1.445	0.692	0.739	0.668	0.481	0.00165687
Molecular Function	GO:0044877	3	macromolecular complex binding	0.0031424	Q8TEQ6	1390	0.329	Q1	K	Gem-associated protein 5 OS=Homo sapiens OX=9606 GN=GEMIN5 PE=1 SV=3	GEMIN5	1	0.000373398	101.65	QHQK(1)SQLCK	3	-1.7575	1	1.637	1.637	1.75	0.557	0.576	0.521	0.329	3.6375e-06
Molecular Function	GO:0044877	3	macromolecular complex binding	0.0031424	P08238	559	0.479	Q1	K	Heat shock protein HSP 90-beta OS=Homo sapiens OX=9606 GN=HSP90AB1 PE=1 SV=4	HSP90AB1	1	0.00072324	111.17	AK(1)FENLCK	3	-0.027707	2	1.508	1.469	1.398	0.714	0.677	0.704	0.479	1.56421e-05
Molecular Function	GO:0044877	3	macromolecular complex binding	0.0031424	P08238	568	0.153	Q1	K	Heat shock protein HSP 90-beta OS=Homo sapiens OX=9606 GN=HSP90AB1 PE=1 SV=4	HSP90AB1	1	0.0129056	82.417	LMK(1)EILDK	2	-0.52759	1	2.117	2.005	1.986	0.335	0.306	0.291	0.153	1.0451e-06
Molecular Function	GO:0044877	3	macromolecular complex binding	0.0031424	Q14847	50	0.459	Q1	K	LIM and SH3 domain protein 1 OS=Homo sapiens OX=9606 GN=LASP1 PE=1 SV=2	LASP1	1	0.010633	57.785	K(1)PYCNAHYPK	3	-0.53436	2	1.432	1.49	1.529	0.706	0.675	0.66	0.459	4.5956e-06
Molecular Function	GO:0044877	3	macromolecular complex binding	0.0031424	P13797	459	0.258	Q1	K	Plastin-3 OS=Homo sapiens OX=9606 GN=PLS3 PE=1 SV=4	PLS3	1	1.38021e-14	145.69	K(1)LENCNYAVELGK	2	1.0384	1	1.869	1.775	1.767	0.46	0.467	0.471	0.258	1.2353e-07
Molecular Function	GO:0044877	3	macromolecular complex binding	0.0031424	P43034	360	0.433	Q1	K	Platelet-activating factor acetylhydrolase IB subunit alpha OS=Homo sapiens OX=9606 GN=PAFAH1B1 PE=1 SV=2	PAFAH1B1	1	0.00320332	72.705	FILSCADDK(1)TLR	2	0.75147	1	1.351	1.606	1.584	0.52	0.74	0.704	0.433	0.0023609
Molecular Function	GO:0050839	4	cell adhesion molecule binding	0.00194782	P04075	140	0.462	Q1	K	Fructose-bisphosphate aldolase A OS=Homo sapiens OX=9606 GN=ALDOA PE=1 SV=2	ALDOA	1	0.0246193	73.499	K(1)DGADFAK	3	0.18494	2	1.579	1.444	1.418	0.69	0.684	0.679	0.462	0.00189588
Molecular Function	GO:0050839	4	cell adhesion molecule binding	0.00194782	Q15149	4576	0.476	Q1	K	Plectin OS=Homo sapiens OX=9606 GN=PLEC PE=1 SV=3	PLEC	1	0.00380529	103.88	YLTCPK(1)TK	3	-0.20071	2	1.483	1.446	1.456	0.71	0.693	0.685	0.476	2.7992e-07
Molecular Function	GO:0050839	4	cell adhesion molecule binding	0.00194782	P18206	316	0.374	Q1	K	Vinculin OS=Homo sapiens OX=9606 GN=VCL PE=1 SV=4	VCL	1	0.0100094	72.34	VGELCAGK(1)ER	2	-1.6995	1	1.722	1.618	1.478	0.627	0.582	0.593	0.374	3.9318e-05
Molecular Function	GO:0050839	4	cell adhesion molecule binding	0.00194782	P47756	57	0.424	Q1	K	F-actin-capping protein subunit beta OS=Homo sapiens OX=9606 GN=CAPZB PE=1 SV=4	CAPZB	1	9.4043e-13	133.47	VVGK(1)DYLLCDYNR	3	-1.9206	2	1.509	1.551	1.529	0.644	0.679	0.623	0.424	2.622e-06
Molecular Function	GO:0050839	4	cell adhesion molecule binding	0.00194782	Q9UM54	240	0.316	Q1	K	Unconventional myosin-VI OS=Homo sapiens OX=9606 GN=MYO6 PE=1 SV=4	MYO6	1	0.0165223	70.056	ICVQGK(1)EER	2	-0.27571	1	1.747	1.741	1.607	0.539	0.568	0.505	0.316	1.61137e-05
Molecular Function	GO:0050839	4	cell adhesion molecule binding	0.00194782	Q9UM54	325	0.466	Q1	K	Unconventional myosin-VI OS=Homo sapiens OX=9606 GN=MYO6 PE=1 SV=4	MYO6	1	0.0271518	81.296	MCTAMK(1)K	2	-0.14267	1	1.465	1.483	1.477	0.704	0.711	0.646	0.466	0.00160093
Molecular Function	GO:0050839	4	cell adhesion molecule binding	0.00194782	P62826	123	0.484	Q1	K	GTP-binding nuclear protein Ran OS=Homo sapiens OX=9606 GN=RAN PE=1 SV=3	RAN	1	1.12796e-19	139.29	VCENIPIVLCGNK(1)VDIK	3	-0.81793	3	1.435	1.493	1.423	0.688	0.703	0.715	0.484	1.2707e-06
Molecular Function	GO:0050839	4	cell adhesion molecule binding	0.00194782	Q16181	208	0.405	Q1	K	Septin-7 OS=Homo sapiens OX=9606 GN=SEPTIN7 PE=1 SV=2	SEPTIN7	1	6.18208e-46	200.19	ADTLTPEECQQFK(1)K	2	0.48685	5	1.584	1.532	1.557	0.624	0.625	0.642	0.405	1.4162e-07
Molecular Function	GO:0050839	4	cell adhesion molecule binding	0.00194782	O95292	45	0.307	Q1	K	Vesicle-associated membrane protein-associated protein B/C OS=Homo sapiens OX=9606 GN=VAPB PE=1 SV=3	VAPB	1	0.0183623	88.819	VK(1)TTAPR	2	0.92096	1	1.883	1.543	1.719	0.5	0.456	0.622	0.307	0.0003986
Molecular Function	GO:0050839	4	cell adhesion molecule binding	0.00194782	O95292	43	0.433	Q1	K	Vesicle-associated membrane protein-associated protein B/C OS=Homo sapiens OX=9606 GN=VAPB PE=1 SV=3	VAPB	1	0.0107878	97.798	NVCFK(1)VK	2	-2.8447	1	1.635	1.469	1.454	0.619	0.725	0.63	0.433	0.000179612
Molecular Function	GO:0050839	4	cell adhesion molecule binding	0.00194782	P62820	131	0.394	Q1	K	Ras-related protein Rab-1A OS=Homo sapiens OX=9606 GN=RAB1A PE=1 SV=3	RAB1A	1	0.00887163	101.72	CDLTTK(1)K	2	-1.4943	1	1.672	1.534	1.52	0.627	0.649	0.585	0.394	2.347e-05
Molecular Function	GO:0050839	4	cell adhesion molecule binding	0.00194782	P37802	40	0.352	Q1	K	Transgelin-2 OS=Homo sapiens OX=9606 GN=TAGLN2 PE=1 SV=3	TAGLN2	1	0.000103609	115.91	K(1)DVGRPQPGR	3	0.41102	3	1.643	1.658	1.609	0.563	0.571	0.596	0.352	3.499e-07
Molecular Function	GO:0050839	4	cell adhesion molecule binding	0.00194782	P13639	571	0.45	Q1	K	Elongation factor 2 OS=Homo sapiens OX=9606 GN=EEF2 PE=1 SV=4	EEF2	1	3.14699e-17	154.28	DLEEDHACIPIK(1)K	2	-0.69618	3	1.467	1.535	1.479	0.652	0.65	0.715	0.45	1.99925e-05
Molecular Function	GO:0050839	4	cell adhesion molecule binding	0.00194782	P13639	594	0.491	Q1	K	Elongation factor 2 OS=Homo sapiens OX=9606 GN=EEF2 PE=1 SV=4	EEF2	1	1.69803e-09	110.12	ETVSEESNVLCLSK(1)SPNK	3	-0.52971	1	1.437	1.587	1.307	0.754	0.662	0.709	0.491	0.00046028
Molecular Function	GO:0050839	4	cell adhesion molecule binding	0.00194782	P35579	180	0.355	Q1	K	Myosin-9 OS=Homo sapiens OX=9606 GN=MYH9 PE=1 SV=4	MYH9	1	5.30441e-22	143.04	EDQSILCTGESGAGK(1)TENTK	3	-0.56027	1	1.567	1.76	1.57	0.594	0.577	0.566	0.355	1.72257e-05
Molecular Function	GO:0050839	4	cell adhesion molecule binding	0.00194782	P35579	565	0.403	Q1	K	Myosin-9 OS=Homo sapiens OX=9606 GN=MYH9 PE=1 SV=4	MYH9	1	0.00243053	54.898	DK(1)ADFCIIHYAGK	3	-0.65742	1	1.575	1.478	1.63	0.589	0.674	0.622	0.403	4.3735e-05
Molecular Function	GO:0050839	4	cell adhesion molecule binding	0.00194782	Q15365	115	0.41	Q1	K	Poly(rC)-binding protein 1 OS=Homo sapiens OX=9606 GN=PCBP1 PE=1 SV=2	PCBP1	1	5.1689e-10	117	LVVPATQCGSLIGK(1)GGCK	3	0.052525	1	1.487	1.646	1.511	0.621	0.582	0.702	0.41	0.000143537
Molecular Function	GO:0050839	4	cell adhesion molecule binding	0.00194782	O60716	448	0.494	Q1	K	Catenin delta-1 OS=Homo sapiens OX=9606 GN=CTNND1 PE=1 SV=1	CTNND1	1	1.1653e-10	125.47	IAIK(1)NCDGVPALVR	3	1.9491	2	1.454	1.467	1.396	0.71	0.723	0.699	0.494	1.3007e-06
Molecular Function	GO:0050839	4	cell adhesion molecule binding	0.00194782	O60716	846	0.494	Q1	K	Catenin delta-1 OS=Homo sapiens OX=9606 GN=CTNND1 PE=1 SV=1	CTNND1	1	0.000757674	89.507	K(1)SDFQVNLNNASR	2	4.4664	1	1.431	1.414	1.468	0.7	0.699	0.732	0.494	1.4922e-06
Molecular Function	GO:0050839	4	cell adhesion molecule binding	0.00194782	Q9UHX1	251	0.457	Q1	K	Poly(U)-binding-splicing factor PUF60 OS=Homo sapiens OX=9606 GN=PUF60 PE=1 SV=1	PUF60	1	0.000334094	105.2	SVFEAFGK(1)IK	2	-1.0713	2	1.457	1.508	1.488	0.664	0.646	0.726	0.457	2.4118e-05
Molecular Function	GO:0050839	4	cell adhesion molecule binding	0.00194782	P42166	334	0.492	Q1	K	Lamina-associated polypeptide 2, isoform alpha OS=Homo sapiens OX=9606 GN=TMPO PE=1 SV=2	TMPO	1	8.27814e-07	118.08	EK(1)SGIQPLCPER	2	0.52641	2	1.459	1.358	1.508	0.711	0.683	0.732	0.492	4.1488e-05
Molecular Function	GO:0050839	4	cell adhesion molecule binding	0.00194782	P43487	154	0.361	Q1	K	Ran-specific GTPase-activating protein OS=Homo sapiens OX=9606 GN=RANBP1 PE=1 SV=1	RANBP1	1	0.0233636	83.948	TK(1)FEECR	2	-0.64741	1	1.725	1.586	1.563	0.591	0.591	0.579	0.361	2.7355e-06
Molecular Function	GO:0050839	4	cell adhesion molecule binding	0.00194782	P06733	335	0.433	Q1	K	Alpha-enolase OS=Homo sapiens OX=9606 GN=ENO1 PE=1 SV=2	ENO1	1	9.75047e-11	130.72	AVNEK(1)SCNCLLLK	2	0.29651	6	1.575	1.526	1.454	0.656	0.66	0.657	0.433	0.00077832
Molecular Function	GO:0050839	4	cell adhesion molecule binding	0.00194782	Q7Z2W4	154	0.348	Q1	K	Zinc finger CCCH-type antiviral protein 1 OS=Homo sapiens OX=9606 GN=ZC3HAV1 PE=1 SV=3	ZC3HAV1	1	0.0412686	74.92	SYK(1)GEGR	2	-0.23329	1	1.79	1.563	1.579	0.507	0.572	0.639	0.348	0.000183768
Molecular Function	GO:0050839	4	cell adhesion molecule binding	0.00194782	P07237	308	0.278	Q1	K	Protein disulfide-isomerase OS=Homo sapiens OX=9606 GN=P4HB PE=1 SV=3	P4HB	1	0.00332344	86.898	ILEFFGLK(1)K	3	-0.031928	2	1.755	1.698	1.841	0.452	0.513	0.506	0.278	1.51387e-05
Molecular Function	GO:0050839	4	cell adhesion molecule binding	0.00194782	P07237	309	0.424	Q1	K	Protein disulfide-isomerase OS=Homo sapiens OX=9606 GN=P4HB PE=1 SV=3	P4HB	1	0.00170122	121.64	K(1)EECPAVR	3	0.4143	2	1.6	1.521	1.471	0.613	0.641	0.691	0.424	3.7866e-05
Molecular Function	GO:0050839	4	cell adhesion molecule binding	0.00194782	P35221	120	0.488	Q1	K	Catenin alpha-1 OS=Homo sapiens OX=9606 GN=CTNNA1 PE=1 SV=1	CTNNA1	1	5.50199e-08	107.82	AAAGEFADDPCSSVK(1)R	2	-0.12176	1	1.365	1.42	1.547	0.7	0.659	0.755	0.488	0.000182432
Molecular Function	GO:0050839	4	cell adhesion molecule binding	0.00194782	P14618	162	0.464	Q1	K	Pyruvate kinase PKM OS=Homo sapiens OX=9606 GN=PKM PE=1 SV=4	PKM	1	6.49953e-05	90.725	CDENILWLDYK(1)NICK	3	-0.11353	1	1.459	1.39	1.578	0.656	0.756	0.643	0.464	0.00025908
Molecular Function	GO:0050839	4	cell adhesion molecule binding	0.00194782	P14618	322	0.414	Q1	K	Pyruvate kinase PKM OS=Homo sapiens OX=9606 GN=PKM PE=1 SV=4	PKM	1	4.11221e-09	110.12	AGK(1)PVICATQMLESMIK	3	0.3365	2	1.583	1.521	1.528	0.626	0.629	0.664	0.414	1.32e-06
Molecular Function	GO:0050839	4	cell adhesion molecule binding	0.00194782	P15924	2778	0.393	Q1	K	Desmoplakin OS=Homo sapiens OX=9606 GN=DSP PE=1 SV=3	DSP	1	0.00540315	95.775	ILTCPK(1)TK	3	0.28722	2	1.629	1.493	1.603	0.599	0.624	0.634	0.393	3.948e-06
Molecular Function	GO:0050839	4	cell adhesion molecule binding	0.00194782	P15924	1144	0.478	Q1	K	Desmoplakin OS=Homo sapiens OX=9606 GN=DSP PE=1 SV=3	DSP	1	0.00870934	73.881	NDYDQLQK(1)AR	2	0.6607	1	1.452	1.523	1.398	0.634	0.744	0.711	0.478	0.000159996
Molecular Function	GO:0050839	4	cell adhesion molecule binding	0.00194782	P15924	1073	0.268	Q1	K	Desmoplakin OS=Homo sapiens OX=9606 GN=DSP PE=1 SV=3	DSP	1	0.00126733	75.102	YQAECSQFK(1)AK	2	-0.57564	2	1.782	1.777	1.795	0.487	0.466	0.48	0.268	3.1201e-08
Molecular Function	GO:0050839	4	cell adhesion molecule binding	0.00194782	P15924	478	0.411	Q1	K	Desmoplakin OS=Homo sapiens OX=9606 GN=DSP PE=1 SV=3	DSP	1	0.000142635	91.961	IVHK(1)GDECILK	3	0.58642	1	1.575	1.541	1.528	0.623	0.661	0.627	0.411	9.0198e-07
Molecular Function	GO:0050839	4	cell adhesion molecule binding	0.00194782	P54136	30	0.431	Q1	K	Arginine--tRNA ligase, cytoplasmic OS=Homo sapiens OX=9606 GN=RARS PE=1 SV=2	RARS	1	4.72399e-24	139.11	LK(1)NCGCLGASPNLEQLQEENLK	4	-1.2617	2	1.572	1.508	1.488	0.701	0.652	0.616	0.431	3.6386e-05
Molecular Function	GO:0050839	4	cell adhesion molecule binding	0.00194782	O00299	166	0.49	Q1	K	Chloride intracellular channel protein 1 OS=Homo sapiens OX=9606 GN=CLIC1 PE=1 SV=4	CLIC1	1	3.02602e-14	127.32	K(1)FLDGNELTLADCNLLPK	3	0.41049	1	1.504	1.463	1.365	0.706	0.645	0.77	0.49	0.00025982
Molecular Function	GO:0050839	4	cell adhesion molecule binding	0.00194782	Q96TA1	462	0.465	Q1	K	Protein Niban 2 OS=Homo sapiens OX=9606 GN=NIBAN2 PE=1 SV=3	NIBAN2	1	0.00220051	77.662	GPTK(1)EELCK	3	-0.56506	1	1.568	1.474	1.388	0.692	0.725	0.644	0.465	0.000100143
Molecular Function	GO:0050839	4	cell adhesion molecule binding	0.00194782	O00151	294	0.483	Q1	K	PDZ and LIM domain protein 1 OS=Homo sapiens OX=9606 GN=PDLIM1 PE=1 SV=4	PDLIM1	1	9.67413e-05	66.022	HPECYVCTDCGTNLK(1)QK	3	-1.3955	1	1.309	1.579	1.467	0.737	0.699	0.666	0.483	0.00030086
Molecular Function	GO:0050839	4	cell adhesion molecule binding	0.00194782	Q9UNF0	167	0.456	Q1	K	Protein kinase C and casein kinase substrate in neurons protein 2 OS=Homo sapiens OX=9606 GN=PACSIN2 PE=1 SV=2	PACSIN2	1	0.00836713	89.827	EEK(1)LAISR	2	2.2291	1	1.553	1.528	1.383	0.68	0.649	0.706	0.456	5.8155e-05
Molecular Function	GO:0050839	4	cell adhesion molecule binding	0.00194782	Q92616	793	0.441	Q1	K	eIF-2-alpha kinase activator GCN1 OS=Homo sapiens OX=9606 GN=GCN1 PE=1 SV=6	GCN1	1	0.0122105	60.91	ANMK(1)RENK	2	-2.2334	1	1.609	1.454	1.461	0.646	0.676	0.673	0.441	2.114e-05
Molecular Function	GO:0050839	4	cell adhesion molecule binding	0.00194782	Q9H0B6	369	0.384	Q1	K	Kinesin light chain 2 OS=Homo sapiens OX=9606 GN=KLC2 PE=1 SV=1	KLC2	1	2.76762e-08	142.38	TK(1)NNLASCYLK	2	-0.26727	1	1.643	1.509	1.614	0.598	0.596	0.637	0.384	4.6155e-06
Molecular Function	GO:0050839	4	cell adhesion molecule binding	0.00194782	Q9Y490	2445	0.279	Q1	K	Talin-1 OS=Homo sapiens OX=9606 GN=TLN1 PE=1 SV=3	TLN1	1	2.8004e-05	114.7	VK(1)ADQDSEAMK	2	-0.094946	1	1.709	1.766	1.815	0.526	0.472	0.478	0.279	2.4271e-06
Molecular Function	GO:0050839	4	cell adhesion molecule binding	0.00194782	Q9NTK5	79	0.4	Q1	K	Obg-like ATPase 1 OS=Homo sapiens OX=9606 GN=OLA1 PE=1 SV=2	OLA1	1	0.000365518	76.759	FDFLCQYHK(1)PASK	3	-0.85143	1	1.533	1.598	1.561	0.627	0.611	0.638	0.4	3.8724e-07
Molecular Function	GO:0050839	4	cell adhesion molecule binding	0.00194782	Q00341	860	0.359	Q1	K	Vigilin OS=Homo sapiens OX=9606 GN=HDLBP PE=1 SV=2	HDLBP	1	0.00441888	101.65	DCVEAAK(1)K	2	0.21792	1	1.587	1.585	1.71	0.603	0.596	0.553	0.359	1.50235e-05
Molecular Function	GO:0050839	4	cell adhesion molecule binding	0.00194782	Q00341	560	0.424	Q1	K	Vigilin OS=Homo sapiens OX=9606 GN=HDLBP PE=1 SV=2	HDLBP	1	0.0217346	76.282	GPK(1)NEVEK	2	1.8813	1	1.563	1.5	1.526	0.596	0.601	0.749	0.424	0.007605
Molecular Function	GO:0050839	4	cell adhesion molecule binding	0.00194782	P21333	578	0.272	Q1	K	Filamin-A OS=Homo sapiens OX=9606 GN=FLNA PE=1 SV=4	FLNA	1	0.000120036	101.56	VGTECGNQK(1)VR	2	-0.21816	1	1.73	1.815	1.784	0.486	0.476	0.485	0.272	6.0056e-08
Molecular Function	GO:0050839	4	cell adhesion molecule binding	0.00194782	P21333	2000	0.359	Q1	K	Filamin-A OS=Homo sapiens OX=9606 GN=FLNA PE=1 SV=4	FLNA	1	0.0408648	66.692	EEPCLLK(1)R	2	-0.50213	1	1.675	1.62	1.586	0.582	0.588	0.583	0.359	1.8799e-07
Molecular Function	GO:0050839	4	cell adhesion molecule binding	0.00194782	P21333	1450	0.495	Q1	K	Filamin-A OS=Homo sapiens OX=9606 GN=FLNA PE=1 SV=4	FLNA	1	0.00011233	90.793	VPVHDVTDASK(1)VK	3	0.48724	1	1.479	1.441	1.393	0.691	0.679	0.764	0.495	6.2437e-05
Molecular Function	GO:0050839	4	cell adhesion molecule binding	0.00194782	Q9UGI8	298	0.217	Q1	K	Testin OS=Homo sapiens OX=9606 GN=TES PE=1 SV=1	TES	1	3.73675e-13	166.07	HYCDSEK(1)PR	3	0.6008	8	1.881	1.913	1.862	0.403	0.431	0.396	0.217	2.9262e-07
Molecular Function	GO:0050839	4	cell adhesion molecule binding	0.00194782	Q9UGI8	193	0.341	Q1	K	Testin OS=Homo sapiens OX=9606 GN=TES PE=1 SV=1	TES	1	4.13503e-16	122.94	SEALGVGDVK(1)LPCEMDAQGPK	3	-2.5135	2	1.645	1.632	1.689	0.561	0.583	0.549	0.341	3.8677e-07
Molecular Function	GO:0050839	4	cell adhesion molecule binding	0.00194782	Q06830	178	0.453	Q1	K	Peroxiredoxin-1 OS=Homo sapiens OX=9606 GN=PRDX1 PE=1 SV=1	PRDX1	0.999997	5.6436e-11	97.69	HGEVCPAGWK(1)PGSDTIKPDVQK	5	0.01739	4	1.498	1.509	1.469	0.721	0.688	0.619	0.453	6.26e-05
Molecular Function	GO:0050839	4	cell adhesion molecule binding	0.00194782	Q06124	178	0.256	Q1	K	Tyrosine-protein phosphatase non-receptor type 11 OS=Homo sapiens OX=9606 GN=PTPN11 PE=1 SV=2	PTPN11	1	0.00118893	79.346	CQELK(1)YDVGGGER	2	0.10773	2	1.739	1.852	1.824	0.421	0.505	0.46	0.256	1.83063e-05
Molecular Function	GO:0050839	4	cell adhesion molecule binding	0.00194782	Q9P0L0	52	0.307	Q1	K	Vesicle-associated membrane protein-associated protein A OS=Homo sapiens OX=9606 GN=VAPA PE=1 SV=3	VAPA	1	0.0183623	88.819	VK(1)TTAPR	2	0.92096	1	1.883	1.543	1.719	0.5	0.456	0.622	0.307	0.0003986
Molecular Function	GO:0050839	4	cell adhesion molecule binding	0.00194782	Q99497	62	0.381	Q1	K	Protein/nucleic acid deglycase DJ-1 OS=Homo sapiens OX=9606 GN=PARK7 PE=1 SV=2	PARK7	1	2.72946e-27	162.29	DVVICPDASLEDAK(1)K	2	-0.16613	1	1.505	1.635	1.635	0.609	0.57	0.638	0.381	2.1387e-05
Molecular Function	GO:0050839	4	cell adhesion molecule binding	0.00194782	P08238	559	0.479	Q1	K	Heat shock protein HSP 90-beta OS=Homo sapiens OX=9606 GN=HSP90AB1 PE=1 SV=4	HSP90AB1	1	0.00072324	111.17	AK(1)FENLCK	3	-0.027707	2	1.508	1.469	1.398	0.714	0.677	0.704	0.479	1.56421e-05
Molecular Function	GO:0050839	4	cell adhesion molecule binding	0.00194782	P08238	568	0.153	Q1	K	Heat shock protein HSP 90-beta OS=Homo sapiens OX=9606 GN=HSP90AB1 PE=1 SV=4	HSP90AB1	1	0.0129056	82.417	LMK(1)EILDK	2	-0.52759	1	2.117	2.005	1.986	0.335	0.306	0.291	0.153	1.0451e-06
Molecular Function	GO:0050839	4	cell adhesion molecule binding	0.00194782	Q14847	50	0.459	Q1	K	LIM and SH3 domain protein 1 OS=Homo sapiens OX=9606 GN=LASP1 PE=1 SV=2	LASP1	1	0.010633	57.785	K(1)PYCNAHYPK	3	-0.53436	2	1.432	1.49	1.529	0.706	0.675	0.66	0.459	4.5956e-06
Molecular Function	GO:0050839	4	cell adhesion molecule binding	0.00194782	Q9H3U1	532	0.331	Q1	K	Protein unc-45 homolog A OS=Homo sapiens OX=9606 GN=UNC45A PE=1 SV=1	UNC45A	1	2.85736e-07	118.2	K(1)WLCNDQIDAGTR	2	0.65944	1	1.624	1.591	1.799	0.494	0.638	0.526	0.331	0.00020271
Molecular Function	GO:0035591	4	signaling adaptor activity	0.269966	Q14847	50	0.459	Q1	K	LIM and SH3 domain protein 1 OS=Homo sapiens OX=9606 GN=LASP1 PE=1 SV=2	LASP1	1	0.010633	57.785	K(1)PYCNAHYPK	3	-0.53436	2	1.432	1.49	1.529	0.706	0.675	0.66	0.459	4.5956e-06
Molecular Function	GO:0035591	4	signaling adaptor activity	0.269966	Q06124	178	0.256	Q1	K	Tyrosine-protein phosphatase non-receptor type 11 OS=Homo sapiens OX=9606 GN=PTPN11 PE=1 SV=2	PTPN11	1	0.00118893	79.346	CQELK(1)YDVGGGER	2	0.10773	2	1.739	1.852	1.824	0.421	0.505	0.46	0.256	1.83063e-05
Molecular Function	GO:0001948	4	glycoprotein binding	0.22532	P21333	578	0.272	Q1	K	Filamin-A OS=Homo sapiens OX=9606 GN=FLNA PE=1 SV=4	FLNA	1	0.000120036	101.56	VGTECGNQK(1)VR	2	-0.21816	1	1.73	1.815	1.784	0.486	0.476	0.485	0.272	6.0056e-08
Molecular Function	GO:0001948	4	glycoprotein binding	0.22532	P21333	2000	0.359	Q1	K	Filamin-A OS=Homo sapiens OX=9606 GN=FLNA PE=1 SV=4	FLNA	1	0.0408648	66.692	EEPCLLK(1)R	2	-0.50213	1	1.675	1.62	1.586	0.582	0.588	0.583	0.359	1.8799e-07
Molecular Function	GO:0001948	4	glycoprotein binding	0.22532	P21333	1450	0.495	Q1	K	Filamin-A OS=Homo sapiens OX=9606 GN=FLNA PE=1 SV=4	FLNA	1	0.00011233	90.793	VPVHDVTDASK(1)VK	3	0.48724	1	1.479	1.441	1.393	0.691	0.679	0.764	0.495	6.2437e-05
Molecular Function	GO:0001948	4	glycoprotein binding	0.22532	P08238	559	0.479	Q1	K	Heat shock protein HSP 90-beta OS=Homo sapiens OX=9606 GN=HSP90AB1 PE=1 SV=4	HSP90AB1	1	0.00072324	111.17	AK(1)FENLCK	3	-0.027707	2	1.508	1.469	1.398	0.714	0.677	0.704	0.479	1.56421e-05
Molecular Function	GO:0001948	4	glycoprotein binding	0.22532	P08238	568	0.153	Q1	K	Heat shock protein HSP 90-beta OS=Homo sapiens OX=9606 GN=HSP90AB1 PE=1 SV=4	HSP90AB1	1	0.0129056	82.417	LMK(1)EILDK	2	-0.52759	1	2.117	2.005	1.986	0.335	0.306	0.291	0.153	1.0451e-06
Molecular Function	GO:0001948	4	glycoprotein binding	0.22532	P11717	1285	0.431	Q1	K	Cation-independent mannose-6-phosphate receptor OS=Homo sapiens OX=9606 GN=IGF2R PE=1 SV=3	IGF2R	1	0.0187544	68.657	VVSSCQEK(1)R	2	-1.3987	1	1.571	1.542	1.451	0.618	0.683	0.664	0.431	2.2521e-05
Molecular Function	GO:0001948	4	glycoprotein binding	0.22532	P18206	316	0.374	Q1	K	Vinculin OS=Homo sapiens OX=9606 GN=VCL PE=1 SV=4	VCL	1	0.0100094	72.34	VGELCAGK(1)ER	2	-1.6995	1	1.722	1.618	1.478	0.627	0.582	0.593	0.374	3.9318e-05
Molecular Function	GO:0050662	4	coenzyme binding	0.0213729	Q13423	1079	0.488	Q1	K	NAD(P) transhydrogenase, mitochondrial OS=Homo sapiens OX=9606 GN=NNT PE=1 SV=3	NNT	1	0.00597409	77.124	TCDALQAK(1)VR	2	-0.79801	1	1.411	1.372	1.558	0.785	0.705	0.63	0.488	0.00063862
Molecular Function	GO:0050662	4	coenzyme binding	0.0213729	Q13423	1071	0.427	Q1	K	NAD(P) transhydrogenase, mitochondrial OS=Homo sapiens OX=9606 GN=NNT PE=1 SV=3	NNT	1	0.00106629	114.86	K(1)TCDALQAK	2	0.43756	1	1.55	1.453	1.573	0.625	0.675	0.656	0.427	1.68698e-05
Molecular Function	GO:0050662	4	coenzyme binding	0.0213729	P09622	66	0.426	Q1	K	Dihydrolipoyl dehydrogenase, mitochondrial OS=Homo sapiens OX=9606 GN=DLD PE=1 SV=2	DLD	1	6.84578e-17	148.57	AAQLGFK(1)TVCIEK	2	0.7406	2	1.537	1.514	1.534	0.697	0.632	0.626	0.426	0.00164226
Molecular Function	GO:0050662	4	coenzyme binding	0.0213729	P24752	174	0.297	Q1	K	Acetyl-CoA acetyltransferase, mitochondrial OS=Homo sapiens OX=9606 GN=ACAT1 PE=1 SV=1	ACAT1	1	0.000149298	75.018	GSTPYGGVK(1)LEDLIVK	3	0.042257	1	1.807	1.635	1.755	0.54	0.495	0.509	0.297	3.2579e-06
Molecular Function	GO:0050662	4	coenzyme binding	0.0213729	Q02218	401	0.272	Q1	K	2-oxoglutarate dehydrogenase, mitochondrial OS=Homo sapiens OX=9606 GN=OGDH PE=1 SV=3	OGDH	1	0.00209311	68.972	AEQFYCGDTEGK(1)K	2	0.74858	1	1.697	1.793	1.836	0.505	0.541	0.405	0.272	0.000136433
Molecular Function	GO:0050662	4	coenzyme binding	0.0213729	P00390	470	0.244	Q1	K	Glutathione reductase, mitochondrial OS=Homo sapiens OX=9606 GN=GSR PE=1 SV=2	GSR	1	0.00839172	77.662	MVCANK(1)EEK	2	1.8422	1	1.889	1.889	1.721	0.46	0.463	0.417	0.244	3.3348e-06
Molecular Function	GO:0050662	4	coenzyme binding	0.0213729	P13804	62	0.281	Q1	K	Electron transfer flavoprotein subunit alpha, mitochondrial OS=Homo sapiens OX=9606 GN=ETFA PE=1 SV=1	ETFA	1	2.8427e-05	125.82	CDK(1)VAQDLCK	3	0.23851	2	1.786	1.774	1.719	0.455	0.538	0.49	0.281	1.70295e-05
Molecular Function	GO:0050662	4	coenzyme binding	0.0213729	P40939	60	0.394	Q1	K	Trifunctional enzyme subunit alpha, mitochondrial OS=Homo sapiens OX=9606 GN=HADHA PE=1 SV=2	HADHA	1	0.000326831	92.38	INSPNSK(1)VNTLSK	2	1.332	1	1.576	1.647	1.499	0.632	0.583	0.645	0.394	2.1245e-05
Molecular Function	GO:0050662	4	coenzyme binding	0.0213729	P40939	353	0.198	Q1	K	Trifunctional enzyme subunit alpha, mitochondrial OS=Homo sapiens OX=9606 GN=HADHA PE=1 SV=2	HADHA	1	0.00293526	99.442	NK(1)FGAPQK	3	-0.27395	2	2.008	1.903	1.879	0.398	0.379	0.367	0.198	4.0698e-07
Molecular Function	GO:0050662	4	coenzyme binding	0.0213729	P40939	644	0.486	Q1	K	Trifunctional enzyme subunit alpha, mitochondrial OS=Homo sapiens OX=9606 GN=HADHA PE=1 SV=2	HADHA	1	4.34993e-05	101.89	GFYIYQEGVK(1)R	2	-1.1374	3	1.474	1.433	1.437	0.671	0.714	0.728	0.486	1.51598e-05
Molecular Function	GO:0050662	4	coenzyme binding	0.0213729	P40939	411	0.18	Q1	K	Trifunctional enzyme subunit alpha, mitochondrial OS=Homo sapiens OX=9606 GN=HADHA PE=1 SV=2	HADHA	1	0.0197409	87.476	GLNDK(1)VK	2	-0.16327	1	2.009	2.02	1.874	0.359	0.375	0.331	0.18	1.2788e-06
Molecular Function	GO:0050662	4	coenzyme binding	0.0213729	P47895	48	0.492	Q1	K	Aldehyde dehydrogenase family 1 member A3 OS=Homo sapiens OX=9606 GN=ALDH1A3 PE=1 SV=2	ALDH1A3	1	0.00157174	86.911	K(1)FATCNPSTR	2	-0.43183	1	1.53	1.442	1.355	0.742	0.696	0.693	0.492	6.4523e-05
Molecular Function	GO:0050662	4	coenzyme binding	0.0213729	O43865	108	0.356	Q1	K	S-adenosylhomocysteine hydrolase-like protein 1 OS=Homo sapiens OX=9606 GN=AHCYL1 PE=1 SV=2	AHCYL1	1	2.22772e-05	116.24	GSSNFCVK(1)NIK	2	-0.21437	2	1.681	1.607	1.609	0.598	0.531	0.613	0.356	2.2281e-05
Molecular Function	GO:0050662	4	coenzyme binding	0.0213729	P48163	422	0.439	Q1	K	NADP-dependent malic enzyme OS=Homo sapiens OX=9606 GN=ME1 PE=1 SV=1	ME1	1	2.51763e-07	113.69	AECSAEQCYK(1)ITK	2	-0.067613	2	1.516	1.5	1.514	0.672	0.603	0.712	0.439	0.0034753
Molecular Function	GO:0050662	4	coenzyme binding	0.0213729	Q8NBZ7	235	0.369	Q1	K	UDP-glucuronic acid decarboxylase 1 OS=Homo sapiens OX=9606 GN=UXS1 PE=1 SV=1	UXS1	1	0.0220714	76.605	ACYDEGK(1)R	2	-1.2846	1	1.648	1.606	1.582	0.581	0.611	0.592	0.369	3.8824e-07
Molecular Function	GO:0050662	4	coenzyme binding	0.0213729	P35914	137	0.498	Q1	K	Hydroxymethylglutaryl-CoA lyase, mitochondrial OS=Homo sapiens OX=9606 GN=HMGCL PE=1 SV=2	HMGCL	1	1.48048e-28	176.83	K(1)NINCSIEESFQR	3	0.46393	3	1.382	1.441	1.469	0.652	0.7	0.787	0.498	0.00026353
Molecular Function	GO:0050662	4	coenzyme binding	0.0213729	Q02252	331	0.425	Q1	K	Methylmalonate-semialdehyde dehydrogenase [acylating], mitochondrial OS=Homo sapiens OX=9606 GN=ALDH6A1 PE=1 SV=2	ALDH6A1	1	0.000862761	80.69	K(1)WLPELVEHAK	3	-0.56312	1	1.597	1.582	1.405	0.569	0.625	0.753	0.425	0.00072338
Molecular Function	GO:0050662	4	coenzyme binding	0.0213729	O60547	338	0.381	Q1	K	GDP-mannose 4,6 dehydratase OS=Homo sapiens OX=9606 GN=GMDS PE=1 SV=1	GMDS	1	8.18842e-10	116.13	YYRPTEVDFLQGDCTK(1)AK	3	-1.1008	1	1.629	1.579	1.575	0.613	0.602	0.605	0.381	7.3982e-08
Molecular Function	GO:0030291	7	protein serine/threonine kinase inhibitor activity	0.00513287	O75367	304	0.372	Q1	K	Core histone macro-H2A.1 OS=Homo sapiens OX=9606 GN=H2AFY PE=1 SV=4	H2AFY	1	0.000144859	116.24	NCLALADDK(1)K	2	0.39339	2	1.634	1.692	1.494	0.556	0.613	0.622	0.372	4.0974e-05
Molecular Function	GO:0030291	7	protein serine/threonine kinase inhibitor activity	0.00513287	P10644	367	0.327	Q1	K	cAMP-dependent protein kinase type I-alpha regulatory subunit OS=Homo sapiens OX=9606 GN=PRKAR1A PE=1 SV=1	PRKAR1A	1	6.36671e-05	106.67	VLGPCSDILK(1)R	2	-0.67679	1	1.637	1.64	1.76	0.573	0.538	0.536	0.327	2.0587e-06
Molecular Function	GO:0030291	7	protein serine/threonine kinase inhibitor activity	0.00513287	P13861	379	0.477	Q1	K	cAMP-dependent protein kinase type II-alpha regulatory subunit OS=Homo sapiens OX=9606 GN=PRKAR2A PE=1 SV=2	PRKAR2A	1	0.00222902	71.03	LLGPCMDIMK(1)R	3	-0.51879	2	1.403	1.491	1.483	0.719	0.659	0.711	0.477	2.2538e-05
Molecular Function	GO:0030291	7	protein serine/threonine kinase inhibitor activity	0.00513287	Q9UD71	152	0.452	Q1	K	Protein phosphatase 1 regulatory subunit 1B OS=Homo sapiens OX=9606 GN=PPP1R1B PE=1 SV=2	PPP1R1B	1	4.97004e-20	100.86	QSAGQK(1)TTCGQGLEGPWERPPPLDESER	3	-0.61595	2	1.578	1.531	1.369	0.662	0.628	0.736	0.452	0.00023867
Molecular Function	GO:0035326	8	enhancer binding	0.167059	P84243	37	0.422	Q1	K	Histone H3.3 OS=Homo sapiens OX=9606 GN=H3-3A PE=1 SV=2	H3-3A	1	0.000237623	93.623	K(1)SAPSTGGVK(1)K	2	-0.62162	5	1.579	1.45	1.573	0.637	0.664	0.641	0.422	4.7532e-06
Molecular Function	GO:0035326	8	enhancer binding	0.167059	P48436	68	0.344	Q1	K	Transcription factor SOX-9 OS=Homo sapiens OX=9606 GN=SOX9 PE=1 SV=1	SOX9	1	5.87822e-10	139.46	ESEEDK(1)FPVCIR	3	0.51072	2	1.718	1.709	1.526	0.562	0.564	0.579	0.344	1.5787e-05
Molecular Function	GO:0035326	8	enhancer binding	0.167059	P23246	291	0.362	Q1	K	Splicing factor, proline- and glutamine-rich OS=Homo sapiens OX=9606 GN=SFPQ PE=1 SV=2	SFPQ	1	8.40845e-05	98.156	RPGEK(1)TYTQR	3	-0.73735	1	1.495	1.709	1.664	0.668	0.613	0.48	0.362	0.0006635
Molecular Function	GO:0008307	3	structural constituent of muscle	0.103166	Q15149	4576	0.476	Q1	K	Plectin OS=Homo sapiens OX=9606 GN=PLEC PE=1 SV=3	PLEC	1	0.00380529	103.88	YLTCPK(1)TK	3	-0.20071	2	1.483	1.446	1.456	0.71	0.693	0.685	0.476	2.7992e-07
Molecular Function	GO:0008307	3	structural constituent of muscle	0.103166	Q12797	646	0.392	Q1	K	Aspartyl/asparaginyl beta-hydroxylase OS=Homo sapiens OX=9606 GN=ASPH PE=1 SV=3	ASPH	1	0.000150126	98.942	GAPK(1)TCTLLEK	3	0.49951	2	1.584	1.579	1.567	0.626	0.608	0.62	0.392	2.7434e-08
Molecular Function	GO:0043531	9	ADP binding	0.0540663	P48163	422	0.439	Q1	K	NADP-dependent malic enzyme OS=Homo sapiens OX=9606 GN=ME1 PE=1 SV=1	ME1	1	2.51763e-07	113.69	AECSAEQCYK(1)ITK	2	-0.067613	2	1.516	1.5	1.514	0.672	0.603	0.712	0.439	0.0034753
Molecular Function	GO:0043531	9	ADP binding	0.0540663	P35579	180	0.355	Q1	K	Myosin-9 OS=Homo sapiens OX=9606 GN=MYH9 PE=1 SV=4	MYH9	1	5.30441e-22	143.04	EDQSILCTGESGAGK(1)TENTK	3	-0.56027	1	1.567	1.76	1.57	0.594	0.577	0.566	0.355	1.72257e-05
Molecular Function	GO:0043531	9	ADP binding	0.0540663	P35579	565	0.403	Q1	K	Myosin-9 OS=Homo sapiens OX=9606 GN=MYH9 PE=1 SV=4	MYH9	1	0.00243053	54.898	DK(1)ADFCIIHYAGK	3	-0.65742	1	1.575	1.478	1.63	0.589	0.674	0.622	0.403	4.3735e-05
Molecular Function	GO:0043531	9	ADP binding	0.0540663	Q9UM54	240	0.316	Q1	K	Unconventional myosin-VI OS=Homo sapiens OX=9606 GN=MYO6 PE=1 SV=4	MYO6	1	0.0165223	70.056	ICVQGK(1)EER	2	-0.27571	1	1.747	1.741	1.607	0.539	0.568	0.505	0.316	1.61137e-05
Molecular Function	GO:0043531	9	ADP binding	0.0540663	Q9UM54	325	0.466	Q1	K	Unconventional myosin-VI OS=Homo sapiens OX=9606 GN=MYO6 PE=1 SV=4	MYO6	1	0.0271518	81.296	MCTAMK(1)K	2	-0.14267	1	1.465	1.483	1.477	0.704	0.711	0.646	0.466	0.00160093
Molecular Function	GO:0043531	9	ADP binding	0.0540663	Q9UHD1	215	0.358	Q1	K	Cysteine and histidine-rich domain-containing protein 1 OS=Homo sapiens OX=9606 GN=CHORDC1 PE=1 SV=2	CHORDC1	1	0.0322207	55.676	GK(1)HMWTK	3	-1.3379	1	1.634	1.62	1.626	0.538	0.614	0.597	0.358	0.00153592
Molecular Function	GO:0043531	9	ADP binding	0.0540663	Q9UHD1	89	0.477	Q1	K	Cysteine and histidine-rich domain-containing protein 1 OS=Homo sapiens OX=9606 GN=CHORDC1 PE=1 SV=2	CHORDC1	1	0.0122898	66.568	ELCELK(1)PK	3	0.27689	5	1.478	1.456	1.447	0.707	0.689	0.695	0.477	9.4199e-08
Molecular Function	GO:0043531	9	ADP binding	0.0540663	Q92614	1429	0.474	Q1	K	Unconventional myosin-XVIIIa OS=Homo sapiens OX=9606 GN=MYO18A PE=1 SV=3	MYO18A	1	0.000436442	127.84	ALQQLK(1)K	2	0.50423	1	1.45	1.472	1.466	0.671	0.71	0.7	0.474	9.1511e-07
Molecular Function	GO:0016831	5	carboxy-lyase activity	0.206365	P48163	422	0.439	Q1	K	NADP-dependent malic enzyme OS=Homo sapiens OX=9606 GN=ME1 PE=1 SV=1	ME1	1	2.51763e-07	113.69	AECSAEQCYK(1)ITK	2	-0.067613	2	1.516	1.5	1.514	0.672	0.603	0.712	0.439	0.0034753
Molecular Function	GO:0016831	5	carboxy-lyase activity	0.206365	Q8NBZ7	235	0.369	Q1	K	UDP-glucuronic acid decarboxylase 1 OS=Homo sapiens OX=9606 GN=UXS1 PE=1 SV=1	UXS1	1	0.0220714	76.605	ACYDEGK(1)R	2	-1.2846	1	1.648	1.606	1.582	0.581	0.611	0.592	0.369	3.8824e-07
Molecular Function	GO:0016831	5	carboxy-lyase activity	0.206365	P30046	21	0.347	Q1	K	D-dopachrome decarboxylase OS=Homo sapiens OX=9606 GN=DDT PE=1 SV=3	DDT	1	0.0134101	82.452	VPAGLEK(1)R	2	1.0636	1	1.669	1.629	1.648	0.641	0.566	0.507	0.347	0.0040648
Molecular Function	GO:0008536	8	Ran GTPase binding	0.106826	P43487	154	0.361	Q1	K	Ran-specific GTPase-activating protein OS=Homo sapiens OX=9606 GN=RANBP1 PE=1 SV=1	RANBP1	1	0.0233636	83.948	TK(1)FEECR	2	-0.64741	1	1.725	1.586	1.563	0.591	0.591	0.579	0.361	2.7355e-06
Molecular Function	GO:0008536	8	Ran GTPase binding	0.106826	Q9HAV4	41	0.321	Q1	K	Exportin-5 OS=Homo sapiens OX=9606 GN=XPO5 PE=1 SV=1	XPO5	1	0.00432488	85.355	FCEEFK(1)EK	3	-0.12728	2	1.76	1.666	1.642	0.532	0.523	0.574	0.321	2.8685e-06
Molecular Function	GO:0008536	8	Ran GTPase binding	0.106826	O14980	103	0.351	Q1	K	Exportin-1 OS=Homo sapiens OX=9606 GN=XPO1 PE=1 SV=1	XPO1	1	0.00322946	107.79	NQCEGIK(1)K	3	-2.6199	2	1.685	1.659	1.58	0.601	0.573	0.553	0.351	2.2658e-06
Molecular Function	GO:0008536	8	Ran GTPase binding	0.106826	O14980	122	0.347	Q1	K	Exportin-1 OS=Homo sapiens OX=9606 GN=XPO1 PE=1 SV=1	XPO1	1	2.0108e-07	125.53	TSSDPTCVEK(1)EK	3	-1.7379	2	1.706	1.593	1.643	0.587	0.569	0.558	0.347	8.8605e-07
Molecular Function	GO:0008536	8	Ran GTPase binding	0.106826	P49792	1332	0.254	Q1	K	E3 SUMO-protein ligase RanBP2 OS=Homo sapiens OX=9606 GN=RANBP2 PE=1 SV=2	RANBP2	1	0.00029099	85.554	EPTSHDNK(1)DICK	3	-1.5358	1	1.751	1.825	1.852	0.407	0.466	0.503	0.254	2.3978e-05
Molecular Function	GO:0008536	8	Ran GTPase binding	0.106826	P49792	2581	0.143	Q1	K	E3 SUMO-protein ligase RanBP2 OS=Homo sapiens OX=9606 GN=RANBP2 PE=1 SV=2	RANBP2	0.995422	1.20345e-09	117.65	K(0.005)CELSK(0.995)NSDIEQSSDSK	3	-0.64278	1	2.129	2.071	1.971	0.279	0.301	0.304	0.143	3.2447e-07
Molecular Function	GO:0008536	8	Ran GTPase binding	0.106826	P49792	2138	0.256	Q1	K	E3 SUMO-protein ligase RanBP2 OS=Homo sapiens OX=9606 GN=RANBP2 PE=1 SV=2	RANBP2	1	0.00316207	107.21	QK(1)FEECQR	2	0.11464	1	1.752	1.82	1.844	0.454	0.437	0.496	0.256	2.3285e-06
Molecular Function	GO:0008536	8	Ran GTPase binding	0.106826	P49792	3034	0.452	Q1	K	E3 SUMO-protein ligase RanBP2 OS=Homo sapiens OX=9606 GN=RANBP2 PE=1 SV=2	RANBP2	1	0.00441888	101.65	EVADCFK(1)K	2	-0.79272	1	1.454	1.469	1.548	0.634	0.709	0.679	0.452	3.5313e-05
Molecular Function	GO:0019103	6	pyrimidine nucleotide binding	0.0569954	P08238	559	0.479	Q1	K	Heat shock protein HSP 90-beta OS=Homo sapiens OX=9606 GN=HSP90AB1 PE=1 SV=4	HSP90AB1	1	0.00072324	111.17	AK(1)FENLCK	3	-0.027707	2	1.508	1.469	1.398	0.714	0.677	0.704	0.479	1.56421e-05
Molecular Function	GO:0019103	6	pyrimidine nucleotide binding	0.0569954	P08238	568	0.153	Q1	K	Heat shock protein HSP 90-beta OS=Homo sapiens OX=9606 GN=HSP90AB1 PE=1 SV=4	HSP90AB1	1	0.0129056	82.417	LMK(1)EILDK	2	-0.52759	1	2.117	2.005	1.986	0.335	0.306	0.291	0.153	1.0451e-06
Molecular Function	GO:0019103	6	pyrimidine nucleotide binding	0.0569954	Q16851	127	0.404	Q1	K	UTP--glucose-1-phosphate uridylyltransferase OS=Homo sapiens OX=9606 GN=UGP2 PE=1 SV=5	UGP2	1	0.0249755	64.906	GPK(1)SLIGVR	2	-0.065317	1	1.654	1.554	1.473	0.636	0.597	0.658	0.404	3.639e-05
Molecular Function	GO:0016624	5	oxidoreductase activity, acting on the aldehyde or oxo group of donors, disulfide as acceptor	0.0108243	P08559	321	0.477	Q1	K	Pyruvate dehydrogenase E1 component subunit alpha, somatic form, mitochondrial OS=Homo sapiens OX=9606 GN=PDHA1 PE=1 SV=3	PDHA1	1	0.000127501	116.74	SDPIMLLK(1)DR	3	-0.61511	3	1.475	1.483	1.42	0.691	0.66	0.738	0.477	3.5027e-05
Molecular Function	GO:0016624	5	oxidoreductase activity, acting on the aldehyde or oxo group of donors, disulfide as acceptor	0.0108243	P08559	313	0.443	Q1	K	Pyruvate dehydrogenase E1 component subunit alpha, somatic form, mitochondrial OS=Homo sapiens OX=9606 GN=PDHA1 PE=1 SV=3	PDHA1	1	0.000353207	107.09	SK(1)SDPIMLLK	2	-0.43555	2	1.553	1.469	1.495	0.707	0.659	0.636	0.443	2.0296e-05
Molecular Function	GO:0016624	5	oxidoreductase activity, acting on the aldehyde or oxo group of donors, disulfide as acceptor	0.0108243	Q02218	401	0.272	Q1	K	2-oxoglutarate dehydrogenase, mitochondrial OS=Homo sapiens OX=9606 GN=OGDH PE=1 SV=3	OGDH	1	0.00209311	68.972	AEQFYCGDTEGK(1)K	2	0.74858	1	1.697	1.793	1.836	0.505	0.541	0.405	0.272	0.000136433
Molecular Function	GO:0016624	5	oxidoreductase activity, acting on the aldehyde or oxo group of donors, disulfide as acceptor	0.0108243	P11177	354	0.474	Q1	K	Pyruvate dehydrogenase E1 component subunit beta, mitochondrial OS=Homo sapiens OX=9606 GN=PDHB PE=1 SV=3	PDHB	1	0.00265664	97.431	DIIFAIK(1)K	2	-0.98846	2	1.48	1.43	1.478	0.7	0.665	0.717	0.474	3.69e-06
Molecular Function	GO:0032557	7	pyrimidine ribonucleotide binding	0.0210207	P08238	559	0.479	Q1	K	Heat shock protein HSP 90-beta OS=Homo sapiens OX=9606 GN=HSP90AB1 PE=1 SV=4	HSP90AB1	1	0.00072324	111.17	AK(1)FENLCK	3	-0.027707	2	1.508	1.469	1.398	0.714	0.677	0.704	0.479	1.56421e-05
Molecular Function	GO:0032557	7	pyrimidine ribonucleotide binding	0.0210207	P08238	568	0.153	Q1	K	Heat shock protein HSP 90-beta OS=Homo sapiens OX=9606 GN=HSP90AB1 PE=1 SV=4	HSP90AB1	1	0.0129056	82.417	LMK(1)EILDK	2	-0.52759	1	2.117	2.005	1.986	0.335	0.306	0.291	0.153	1.0451e-06
Molecular Function	GO:0032557	7	pyrimidine ribonucleotide binding	0.0210207	Q16851	127	0.404	Q1	K	UTP--glucose-1-phosphate uridylyltransferase OS=Homo sapiens OX=9606 GN=UGP2 PE=1 SV=5	UGP2	1	0.0249755	64.906	GPK(1)SLIGVR	2	-0.065317	1	1.654	1.554	1.473	0.636	0.597	0.658	0.404	3.639e-05
Molecular Function	GO:0005516	4	calmodulin binding	0.205311	Q13576	553	0.379	Q1	K	Ras GTPase-activating-like protein IQGAP2 OS=Homo sapiens OX=9606 GN=IQGAP2 PE=1 SV=4	IQGAP2	1	0.00516444	78.324	K(1)SSDILSVLK	2	-0.62996	1	1.562	1.607	1.618	0.612	0.547	0.655	0.379	5.7146e-05
Molecular Function	GO:0005516	4	calmodulin binding	0.205311	Q13576	273	0.384	Q1	K	Ras GTPase-activating-like protein IQGAP2 OS=Homo sapiens OX=9606 GN=IQGAP2 PE=1 SV=4	IQGAP2	1	0.00160054	85.163	LK(1)NSCISEEER	2	-0.32659	1	1.651	1.654	1.463	0.624	0.568	0.638	0.384	5.9778e-05
Molecular Function	GO:0005516	4	calmodulin binding	0.205311	Q13576	1454	0.478	Q1	K	Ras GTPase-activating-like protein IQGAP2 OS=Homo sapiens OX=9606 GN=IQGAP2 PE=1 SV=4	IQGAP2	1	0.0105865	86.882	TCLDNLK(1)R	2	-0.99215	1	1.5	1.459	1.416	0.707	0.68	0.706	0.478	1.9511e-06
Molecular Function	GO:0005516	4	calmodulin binding	0.205311	P35579	180	0.355	Q1	K	Myosin-9 OS=Homo sapiens OX=9606 GN=MYH9 PE=1 SV=4	MYH9	1	5.30441e-22	143.04	EDQSILCTGESGAGK(1)TENTK	3	-0.56027	1	1.567	1.76	1.57	0.594	0.577	0.566	0.355	1.72257e-05
Molecular Function	GO:0005516	4	calmodulin binding	0.205311	P35579	565	0.403	Q1	K	Myosin-9 OS=Homo sapiens OX=9606 GN=MYH9 PE=1 SV=4	MYH9	1	0.00243053	54.898	DK(1)ADFCIIHYAGK	3	-0.65742	1	1.575	1.478	1.63	0.589	0.674	0.622	0.403	4.3735e-05
Molecular Function	GO:0005516	4	calmodulin binding	0.205311	Q13557	292	0.489	Q1	K	Calcium/calmodulin-dependent protein kinase type II subunit delta OS=Homo sapiens OX=9606 GN=CAMK2D PE=1 SV=3	CAMK2D	1	0.0244498	51.436	QETVDCLK(1)K	3	0.21401	1	1.637	1.358	1.344	0.655	0.756	0.712	0.489	0.00073807
Molecular Function	GO:0005516	4	calmodulin binding	0.205311	Q9UM54	240	0.316	Q1	K	Unconventional myosin-VI OS=Homo sapiens OX=9606 GN=MYO6 PE=1 SV=4	MYO6	1	0.0165223	70.056	ICVQGK(1)EER	2	-0.27571	1	1.747	1.741	1.607	0.539	0.568	0.505	0.316	1.61137e-05
Molecular Function	GO:0005516	4	calmodulin binding	0.205311	Q9UM54	325	0.466	Q1	K	Unconventional myosin-VI OS=Homo sapiens OX=9606 GN=MYO6 PE=1 SV=4	MYO6	1	0.0271518	81.296	MCTAMK(1)K	2	-0.14267	1	1.465	1.483	1.477	0.704	0.711	0.646	0.466	0.00160093
Molecular Function	GO:0005516	4	calmodulin binding	0.205311	P17844	197	0.252	Q1	K	Probable ATP-dependent RNA helicase DDX5 OS=Homo sapiens OX=9606 GN=DDX5 PE=1 SV=1	DDX5	1	7.68943e-05	102.9	LK(1)STCIYGGAPK	3	-1.9744	2	1.857	1.777	1.81	0.443	0.473	0.458	0.252	2.2599e-07
Molecular Function	GO:0005516	4	calmodulin binding	0.205311	P17844	351	0.391	Q1	K	Probable ATP-dependent RNA helicase DDX5 OS=Homo sapiens OX=9606 GN=DDX5 PE=1 SV=1	DDX5	1	0.00120581	112.36	TIVFVETK(1)R	2	-0.61373	2	1.629	1.536	1.571	0.611	0.645	0.596	0.391	2.686e-06
Molecular Function	GO:0032451	3	demethylase activity	0.103166	Q9C0B1	469	0.431	Q1	K	Alpha-ketoglutarate-dependent dioxygenase FTO OS=Homo sapiens OX=9606 GN=FTO PE=1 SV=3	FTO	1	6.61723e-06	122.55	TLPADQK(1)PECR	2	-1.0807	1	1.579	1.476	1.506	0.627	0.677	0.663	0.431	1.50745e-05
Molecular Function	GO:0032451	3	demethylase activity	0.103166	Q9Y4C1	394	0.051	Q1	K	Lysine-specific demethylase 3A OS=Homo sapiens OX=9606 GN=KDM3A PE=1 SV=4	KDM3A	1	2.7563e-08	109.55	GSCTQPK(1)TNTDQENR	2	-0.4553	2	2.311	2.263	2.376	0.069	0.155	0.131	0.051	0.0065788
Molecular Function	GO:0019789	5	SUMO transferase activity	0.103166	P63279	49	0.356	Q1	K	SUMO-conjugating enzyme UBC9 OS=Homo sapiens OX=9606 GN=UBE2I PE=1 SV=1	UBE2I	1	0.00141737	86.699	K(1)GTPWEGGLFK	3	0.37048	2	1.601	1.604	1.683	0.538	0.568	0.634	0.356	3.7389e-05
Molecular Function	GO:0019789	5	SUMO transferase activity	0.103166	P49792	1332	0.254	Q1	K	E3 SUMO-protein ligase RanBP2 OS=Homo sapiens OX=9606 GN=RANBP2 PE=1 SV=2	RANBP2	1	0.00029099	85.554	EPTSHDNK(1)DICK	3	-1.5358	1	1.751	1.825	1.852	0.407	0.466	0.503	0.254	2.3978e-05
Molecular Function	GO:0019789	5	SUMO transferase activity	0.103166	P49792	2581	0.143	Q1	K	E3 SUMO-protein ligase RanBP2 OS=Homo sapiens OX=9606 GN=RANBP2 PE=1 SV=2	RANBP2	0.995422	1.20345e-09	117.65	K(0.005)CELSK(0.995)NSDIEQSSDSK	3	-0.64278	1	2.129	2.071	1.971	0.279	0.301	0.304	0.143	3.2447e-07
Molecular Function	GO:0019789	5	SUMO transferase activity	0.103166	P49792	2138	0.256	Q1	K	E3 SUMO-protein ligase RanBP2 OS=Homo sapiens OX=9606 GN=RANBP2 PE=1 SV=2	RANBP2	1	0.00316207	107.21	QK(1)FEECQR	2	0.11464	1	1.752	1.82	1.844	0.454	0.437	0.496	0.256	2.3285e-06
Molecular Function	GO:0019789	5	SUMO transferase activity	0.103166	P49792	3034	0.452	Q1	K	E3 SUMO-protein ligase RanBP2 OS=Homo sapiens OX=9606 GN=RANBP2 PE=1 SV=2	RANBP2	1	0.00441888	101.65	EVADCFK(1)K	2	-0.79272	1	1.454	1.469	1.548	0.634	0.709	0.679	0.452	3.5313e-05
Molecular Function	GO:0046961	15	proton-transporting ATPase activity, rotational mechanism	0.155835	P38606	132	0.405	Q1	K	V-type proton ATPase catalytic subunit A OS=Homo sapiens OX=9606 GN=ATP6V1A PE=1 SV=2	ATP6V1A	1	0.000353207	107.09	DIK(1)WDFTPCK	2	-0.13164	2	1.639	1.537	1.502	0.652	0.641	0.6	0.405	1.77762e-05
Molecular Function	GO:0046961	15	proton-transporting ATPase activity, rotational mechanism	0.155835	P21281	109	0.48	Q1	K	V-type proton ATPase subunit B, brain isoform OS=Homo sapiens OX=9606 GN=ATP6V1B2 PE=1 SV=3	ATP6V1B2	1	0.000924525	87.718	K(1)TSCEFTGDILR	3	-0.37516	3	1.482	1.45	1.439	0.716	0.687	0.694	0.48	5.5611e-07
Molecular Function	GO:0004725	8	protein tyrosine phosphatase activity	0.155835	P24666	65	0.326	Q1	K	Low molecular weight phosphotyrosine protein phosphatase OS=Homo sapiens OX=9606 GN=ACP1 PE=1 SV=3	ACP1	1	0.0362763	46.426	GQSCMK(1)R	2	-0.69206	2	1.722	1.619	1.703	0.516	0.593	0.534	0.326	1.83067e-05
Molecular Function	GO:0004725	8	protein tyrosine phosphatase activity	0.155835	P24666	113	0.381	Q1	K	Low molecular weight phosphotyrosine protein phosphatase OS=Homo sapiens OX=9606 GN=ACP1 PE=1 SV=3	ACP1	1	0.000278246	80.96	AK(1)IELLGSYDPQK	3	-0.38785	1	1.69	1.581	1.512	0.61	0.588	0.623	0.381	1.60738e-05
Molecular Function	GO:0004725	8	protein tyrosine phosphatase activity	0.155835	Q06124	178	0.256	Q1	K	Tyrosine-protein phosphatase non-receptor type 11 OS=Homo sapiens OX=9606 GN=PTPN11 PE=1 SV=2	PTPN11	1	0.00118893	79.346	CQELK(1)YDVGGGER	2	0.10773	2	1.739	1.852	1.824	0.421	0.505	0.46	0.256	1.83063e-05
Molecular Function	GO:0022836	6	gated channel activity	0.269966	O00299	166	0.49	Q1	K	Chloride intracellular channel protein 1 OS=Homo sapiens OX=9606 GN=CLIC1 PE=1 SV=4	CLIC1	1	3.02602e-14	127.32	K(1)FLDGNELTLADCNLLPK	3	0.41049	1	1.504	1.463	1.365	0.706	0.645	0.77	0.49	0.00025982
Molecular Function	GO:0022836	6	gated channel activity	0.269966	Q14573	258	0.471	Q1	K	Inositol 1,4,5-trisphosphate receptor type 3 OS=Homo sapiens OX=9606 GN=ITPR3 PE=1 SV=2	ITPR3	1	0.000333363	105.13	FLTCDEYK(1)GK	2	-1.2035	2	1.529	1.425	1.454	0.707	0.674	0.693	0.471	3.6728e-06
Molecular Function	GO:0004739	6	pyruvate dehydrogenase (acetyl-transferring) activity	0.0210207	P08559	321	0.477	Q1	K	Pyruvate dehydrogenase E1 component subunit alpha, somatic form, mitochondrial OS=Homo sapiens OX=9606 GN=PDHA1 PE=1 SV=3	PDHA1	1	0.000127501	116.74	SDPIMLLK(1)DR	3	-0.61511	3	1.475	1.483	1.42	0.691	0.66	0.738	0.477	3.5027e-05
Molecular Function	GO:0004739	6	pyruvate dehydrogenase (acetyl-transferring) activity	0.0210207	P08559	313	0.443	Q1	K	Pyruvate dehydrogenase E1 component subunit alpha, somatic form, mitochondrial OS=Homo sapiens OX=9606 GN=PDHA1 PE=1 SV=3	PDHA1	1	0.000353207	107.09	SK(1)SDPIMLLK	2	-0.43555	2	1.553	1.469	1.495	0.707	0.659	0.636	0.443	2.0296e-05
Molecular Function	GO:0004739	6	pyruvate dehydrogenase (acetyl-transferring) activity	0.0210207	P11177	354	0.474	Q1	K	Pyruvate dehydrogenase E1 component subunit beta, mitochondrial OS=Homo sapiens OX=9606 GN=PDHB PE=1 SV=3	PDHB	1	0.00265664	97.431	DIIFAIK(1)K	2	-0.98846	2	1.48	1.43	1.478	0.7	0.665	0.717	0.474	3.69e-06
Molecular Function	GO:0043274	5	phospholipase binding	0.103166	P43034	360	0.433	Q1	K	Platelet-activating factor acetylhydrolase IB subunit alpha OS=Homo sapiens OX=9606 GN=PAFAH1B1 PE=1 SV=2	PAFAH1B1	1	0.00320332	72.705	FILSCADDK(1)TLR	2	0.75147	1	1.351	1.606	1.584	0.52	0.74	0.704	0.433	0.0023609
Molecular Function	GO:0043274	5	phospholipase binding	0.103166	Q06124	178	0.256	Q1	K	Tyrosine-protein phosphatase non-receptor type 11 OS=Homo sapiens OX=9606 GN=PTPN11 PE=1 SV=2	PTPN11	1	0.00118893	79.346	CQELK(1)YDVGGGER	2	0.10773	2	1.739	1.852	1.824	0.421	0.505	0.46	0.256	1.83063e-05
Molecular Function	GO:0099106	4	ion channel regulator activity	0.212155	P21333	578	0.272	Q1	K	Filamin-A OS=Homo sapiens OX=9606 GN=FLNA PE=1 SV=4	FLNA	1	0.000120036	101.56	VGTECGNQK(1)VR	2	-0.21816	1	1.73	1.815	1.784	0.486	0.476	0.485	0.272	6.0056e-08
Molecular Function	GO:0099106	4	ion channel regulator activity	0.212155	P21333	2000	0.359	Q1	K	Filamin-A OS=Homo sapiens OX=9606 GN=FLNA PE=1 SV=4	FLNA	1	0.0408648	66.692	EEPCLLK(1)R	2	-0.50213	1	1.675	1.62	1.586	0.582	0.588	0.583	0.359	1.8799e-07
Molecular Function	GO:0099106	4	ion channel regulator activity	0.212155	P21333	1450	0.495	Q1	K	Filamin-A OS=Homo sapiens OX=9606 GN=FLNA PE=1 SV=4	FLNA	1	0.00011233	90.793	VPVHDVTDASK(1)VK	3	0.48724	1	1.479	1.441	1.393	0.691	0.679	0.764	0.495	6.2437e-05
Molecular Function	GO:0099106	4	ion channel regulator activity	0.212155	Q13557	292	0.489	Q1	K	Calcium/calmodulin-dependent protein kinase type II subunit delta OS=Homo sapiens OX=9606 GN=CAMK2D PE=1 SV=3	CAMK2D	1	0.0244498	51.436	QETVDCLK(1)K	3	0.21401	1	1.637	1.358	1.344	0.655	0.756	0.712	0.489	0.00073807
Molecular Function	GO:0005507	7	copper ion binding	0.103166	Q99497	62	0.381	Q1	K	Protein/nucleic acid deglycase DJ-1 OS=Homo sapiens OX=9606 GN=PARK7 PE=1 SV=2	PARK7	1	2.72946e-27	162.29	DVVICPDASLEDAK(1)K	2	-0.16613	1	1.505	1.635	1.635	0.609	0.57	0.638	0.381	2.1387e-05
Molecular Function	GO:0005507	7	copper ion binding	0.103166	Q14061	30	0.314	Q1	K	Cytochrome c oxidase copper chaperone OS=Homo sapiens OX=9606 GN=COX17 PE=1 SV=2	COX17	1	0.000242026	75.911	KPLKPCCACPETK(1)K	4	0.22637	1	1.732	1.742	1.627	0.497	0.553	0.553	0.314	1.50298e-05
Molecular Function	GO:0008276	6	protein methyltransferase activity	0.0445566	Q8NEZ4	758	0.436	Q1	K	Histone-lysine N-methyltransferase 2C OS=Homo sapiens OX=9606 GN=KMT2C PE=1 SV=3	KMT2C	1	1.59482e-15	166.6	DVSYQGGK(1)SIK	2	-0.421	2	1.508	1.513	1.523	0.677	0.667	0.635	0.436	0.00055665
Molecular Function	GO:0008276	6	protein methyltransferase activity	0.0445566	Q9UMN6	926	0.278	Q1	K	Histone-lysine N-methyltransferase 2B OS=Homo sapiens OX=9606 GN=KMT2B PE=1 SV=1	KMT2B	1	1.13152e-13	91.079	GK(1)VEAAGPGGESEPTGSGGTLAHTPR	3	-0.28959	1	1.528	1.636	2.129	0.557	0.644	0.271	0.278	0.0095622
Molecular Function	GO:0008276	6	protein methyltransferase activity	0.0445566	P22087	102	0.431	Q1	K	rRNA 2'-O-methyltransferase fibrillarin OS=Homo sapiens OX=9606 GN=FBL PE=1 SV=2	FBL	1	0.006593	64.82	GK(1)EDALVTK	3	0.56476	1	1.614	1.463	1.488	0.653	0.625	0.69	0.431	3.7804e-05
Molecular Function	GO:0008276	6	protein methyltransferase activity	0.0445566	P61964	159	0.483	Q1	K	WD repeat-containing protein 5 OS=Homo sapiens OX=9606 GN=WDR5 PE=1 SV=1	WDR5	1	0.0091824	88.495	IWDVK(1)TGK	3	0.80805	2	1.444	1.439	1.473	0.691	0.714	0.7	0.483	2.2067e-07
Molecular Function	GO:0051213	4	dioxygenase activity	0.0188351	Q9C0B1	469	0.431	Q1	K	Alpha-ketoglutarate-dependent dioxygenase FTO OS=Homo sapiens OX=9606 GN=FTO PE=1 SV=3	FTO	1	6.61723e-06	122.55	TLPADQK(1)PECR	2	-1.0807	1	1.579	1.476	1.506	0.627	0.677	0.663	0.431	1.50745e-05
Molecular Function	GO:0051213	4	dioxygenase activity	0.0188351	Q12797	646	0.392	Q1	K	Aspartyl/asparaginyl beta-hydroxylase OS=Homo sapiens OX=9606 GN=ASPH PE=1 SV=3	ASPH	1	0.000150126	98.942	GAPK(1)TCTLLEK	3	0.49951	2	1.584	1.579	1.567	0.626	0.608	0.62	0.392	2.7434e-08
Molecular Function	GO:0051213	4	dioxygenase activity	0.0188351	P07237	308	0.278	Q1	K	Protein disulfide-isomerase OS=Homo sapiens OX=9606 GN=P4HB PE=1 SV=3	P4HB	1	0.00332344	86.898	ILEFFGLK(1)K	3	-0.031928	2	1.755	1.698	1.841	0.452	0.513	0.506	0.278	1.51387e-05
Molecular Function	GO:0051213	4	dioxygenase activity	0.0188351	P07237	309	0.424	Q1	K	Protein disulfide-isomerase OS=Homo sapiens OX=9606 GN=P4HB PE=1 SV=3	P4HB	1	0.00170122	121.64	K(1)EECPAVR	3	0.4143	2	1.6	1.521	1.471	0.613	0.641	0.691	0.424	3.7866e-05
Molecular Function	GO:0051213	4	dioxygenase activity	0.0188351	Q9Y4C1	394	0.051	Q1	K	Lysine-specific demethylase 3A OS=Homo sapiens OX=9606 GN=KDM3A PE=1 SV=4	KDM3A	1	2.7563e-08	109.55	GSCTQPK(1)TNTDQENR	2	-0.4553	2	2.311	2.263	2.376	0.069	0.155	0.131	0.051	0.0065788
Molecular Function	GO:0023023	5	MHC protein complex binding	0.0676281	P08238	559	0.479	Q1	K	Heat shock protein HSP 90-beta OS=Homo sapiens OX=9606 GN=HSP90AB1 PE=1 SV=4	HSP90AB1	1	0.00072324	111.17	AK(1)FENLCK	3	-0.027707	2	1.508	1.469	1.398	0.714	0.677	0.704	0.479	1.56421e-05
Molecular Function	GO:0023023	5	MHC protein complex binding	0.0676281	P08238	568	0.153	Q1	K	Heat shock protein HSP 90-beta OS=Homo sapiens OX=9606 GN=HSP90AB1 PE=1 SV=4	HSP90AB1	1	0.0129056	82.417	LMK(1)EILDK	2	-0.52759	1	2.117	2.005	1.986	0.335	0.306	0.291	0.153	1.0451e-06
Molecular Function	GO:0023023	5	MHC protein complex binding	0.0676281	P07900	576	0.235	Q1	K	Heat shock protein HSP 90-alpha OS=Homo sapiens OX=9606 GN=HSP90AA1 PE=1 SV=5	HSP90AA1	1	0.00316475	93.096	IMK(1)DILEK	3	0.51489	4	1.881	1.876	1.791	0.418	0.456	0.43	0.235	5.6281e-07
Molecular Function	GO:0023023	5	MHC protein complex binding	0.0676281	P14618	162	0.464	Q1	K	Pyruvate kinase PKM OS=Homo sapiens OX=9606 GN=PKM PE=1 SV=4	PKM	1	6.49953e-05	90.725	CDENILWLDYK(1)NICK	3	-0.11353	1	1.459	1.39	1.578	0.656	0.756	0.643	0.464	0.00025908
Molecular Function	GO:0023023	5	MHC protein complex binding	0.0676281	P14618	322	0.414	Q1	K	Pyruvate kinase PKM OS=Homo sapiens OX=9606 GN=PKM PE=1 SV=4	PKM	1	4.11221e-09	110.12	AGK(1)PVICATQMLESMIK	3	0.3365	2	1.583	1.521	1.528	0.626	0.629	0.664	0.414	1.32e-06
Molecular Function	GO:0016829	3	lyase activity	0.00893769	P04075	140	0.462	Q1	K	Fructose-bisphosphate aldolase A OS=Homo sapiens OX=9606 GN=ALDOA PE=1 SV=2	ALDOA	1	0.0246193	73.499	K(1)DGADFAK	3	0.18494	2	1.579	1.444	1.418	0.69	0.684	0.679	0.462	0.00189588
Molecular Function	GO:0016829	3	lyase activity	0.00893769	P24752	174	0.297	Q1	K	Acetyl-CoA acetyltransferase, mitochondrial OS=Homo sapiens OX=9606 GN=ACAT1 PE=1 SV=1	ACAT1	1	0.000149298	75.018	GSTPYGGVK(1)LEDLIVK	3	0.042257	1	1.807	1.635	1.755	0.54	0.495	0.509	0.297	3.2579e-06
Molecular Function	GO:0016829	3	lyase activity	0.00893769	P30046	21	0.347	Q1	K	D-dopachrome decarboxylase OS=Homo sapiens OX=9606 GN=DDT PE=1 SV=3	DDT	1	0.0134101	82.452	VPAGLEK(1)R	2	1.0636	1	1.669	1.629	1.648	0.641	0.566	0.507	0.347	0.0040648
Molecular Function	GO:0016829	3	lyase activity	0.00893769	P40939	60	0.394	Q1	K	Trifunctional enzyme subunit alpha, mitochondrial OS=Homo sapiens OX=9606 GN=HADHA PE=1 SV=2	HADHA	1	0.000326831	92.38	INSPNSK(1)VNTLSK	2	1.332	1	1.576	1.647	1.499	0.632	0.583	0.645	0.394	2.1245e-05
Molecular Function	GO:0016829	3	lyase activity	0.00893769	P40939	353	0.198	Q1	K	Trifunctional enzyme subunit alpha, mitochondrial OS=Homo sapiens OX=9606 GN=HADHA PE=1 SV=2	HADHA	1	0.00293526	99.442	NK(1)FGAPQK	3	-0.27395	2	2.008	1.903	1.879	0.398	0.379	0.367	0.198	4.0698e-07
Molecular Function	GO:0016829	3	lyase activity	0.00893769	P40939	644	0.486	Q1	K	Trifunctional enzyme subunit alpha, mitochondrial OS=Homo sapiens OX=9606 GN=HADHA PE=1 SV=2	HADHA	1	4.34993e-05	101.89	GFYIYQEGVK(1)R	2	-1.1374	3	1.474	1.433	1.437	0.671	0.714	0.728	0.486	1.51598e-05
Molecular Function	GO:0016829	3	lyase activity	0.00893769	P40939	411	0.18	Q1	K	Trifunctional enzyme subunit alpha, mitochondrial OS=Homo sapiens OX=9606 GN=HADHA PE=1 SV=2	HADHA	1	0.0197409	87.476	GLNDK(1)VK	2	-0.16327	1	2.009	2.02	1.874	0.359	0.375	0.331	0.18	1.2788e-06
Molecular Function	GO:0016829	3	lyase activity	0.00893769	P55084	188	0.248	Q1	K	Trifunctional enzyme subunit beta, mitochondrial OS=Homo sapiens OX=9606 GN=HADHB PE=1 SV=3	HADHB	1	0.000377405	113.93	LMLDLNK(1)AK	3	0.19183	2	1.873	1.814	1.785	0.46	0.448	0.449	0.248	5.8526e-08
Molecular Function	GO:0016829	3	lyase activity	0.00893769	P55084	293	0.446	Q1	K	Trifunctional enzyme subunit beta, mitochondrial OS=Homo sapiens OX=9606 GN=HADHB PE=1 SV=3	HADHB	1	0.0081807	79.116	LK(1)PAFIK	3	-0.1348	1	1.416	1.582	1.5	0.668	0.666	0.672	0.446	0.00158112
Molecular Function	GO:0016829	3	lyase activity	0.00893769	Q99497	62	0.381	Q1	K	Protein/nucleic acid deglycase DJ-1 OS=Homo sapiens OX=9606 GN=PARK7 PE=1 SV=2	PARK7	1	2.72946e-27	162.29	DVVICPDASLEDAK(1)K	2	-0.16613	1	1.505	1.635	1.635	0.609	0.57	0.638	0.381	2.1387e-05
Molecular Function	GO:0016829	3	lyase activity	0.00893769	Q8NBZ7	235	0.369	Q1	K	UDP-glucuronic acid decarboxylase 1 OS=Homo sapiens OX=9606 GN=UXS1 PE=1 SV=1	UXS1	1	0.0220714	76.605	ACYDEGK(1)R	2	-1.2846	1	1.648	1.606	1.582	0.581	0.611	0.592	0.369	3.8824e-07
Molecular Function	GO:0016829	3	lyase activity	0.00893769	P48163	422	0.439	Q1	K	NADP-dependent malic enzyme OS=Homo sapiens OX=9606 GN=ME1 PE=1 SV=1	ME1	1	2.51763e-07	113.69	AECSAEQCYK(1)ITK	2	-0.067613	2	1.516	1.5	1.514	0.672	0.603	0.712	0.439	0.0034753
Molecular Function	GO:0016829	3	lyase activity	0.00893769	P30566	402	0.291	Q1	K	Adenylosuccinate lyase OS=Homo sapiens OX=9606 GN=ADSL PE=1 SV=2	ADSL	1	0.0109968	85.533	QDCHEK(1)IR	2	-0.15072	2	1.721	1.685	1.818	0.519	0.539	0.464	0.291	1.82115e-05
Molecular Function	GO:0016829	3	lyase activity	0.00893769	P06733	335	0.433	Q1	K	Alpha-enolase OS=Homo sapiens OX=9606 GN=ENO1 PE=1 SV=2	ENO1	1	9.75047e-11	130.72	AVNEK(1)SCNCLLLK	2	0.29651	6	1.575	1.526	1.454	0.656	0.66	0.657	0.433	0.00077832
Molecular Function	GO:0016829	3	lyase activity	0.00893769	P09429	50	0.498	Q1	K	High mobility group protein B1 OS=Homo sapiens OX=9606 GN=HMGB1 PE=1 SV=3	HMGB1	1	0.0185525	64.567	WK(1)TMSAK	3	-0.52405	1	1.515	1.361	1.429	0.766	0.686	0.694	0.498	0.000119089
Molecular Function	GO:0016829	3	lyase activity	0.00893769	P35914	137	0.498	Q1	K	Hydroxymethylglutaryl-CoA lyase, mitochondrial OS=Homo sapiens OX=9606 GN=HMGCL PE=1 SV=2	HMGCL	1	1.48048e-28	176.83	K(1)NINCSIEESFQR	3	0.46393	3	1.382	1.441	1.469	0.652	0.7	0.787	0.498	0.00026353
Molecular Function	GO:0016829	3	lyase activity	0.00893769	O60547	338	0.381	Q1	K	GDP-mannose 4,6 dehydratase OS=Homo sapiens OX=9606 GN=GMDS PE=1 SV=1	GMDS	1	8.18842e-10	116.13	YYRPTEVDFLQGDCTK(1)AK	3	-1.1008	1	1.629	1.579	1.575	0.613	0.602	0.605	0.381	7.3982e-08
Molecular Function	GO:0019843	6	rRNA binding	0.187439	P39023	136	0.473	Q1	K	60S ribosomal protein L3 OS=Homo sapiens OX=9606 GN=RPL3 PE=1 SV=2	RPL3	1	0.00322946	107.79	K(1)WQDEDGK	2	0.81854	2	1.454	1.503	1.438	0.696	0.723	0.66	0.473	1.7225e-05
Molecular Function	GO:0019843	6	rRNA binding	0.187439	P39023	341	0.377	Q1	K	60S ribosomal protein L3 OS=Homo sapiens OX=9606 GN=RPL3 PE=1 SV=2	RPL3	1	0.0219442	76.679	GCVVGTK(1)K	3	-1.1525	2	1.633	1.637	1.526	0.635	0.545	0.63	0.377	5.9053e-05
Molecular Function	GO:0019843	6	rRNA binding	0.187439	P13639	571	0.45	Q1	K	Elongation factor 2 OS=Homo sapiens OX=9606 GN=EEF2 PE=1 SV=4	EEF2	1	3.14699e-17	154.28	DLEEDHACIPIK(1)K	2	-0.69618	3	1.467	1.535	1.479	0.652	0.65	0.715	0.45	1.99925e-05
Molecular Function	GO:0019843	6	rRNA binding	0.187439	P13639	594	0.491	Q1	K	Elongation factor 2 OS=Homo sapiens OX=9606 GN=EEF2 PE=1 SV=4	EEF2	1	1.69803e-09	110.12	ETVSEESNVLCLSK(1)SPNK	3	-0.52971	1	1.437	1.587	1.307	0.754	0.662	0.709	0.491	0.00046028
Molecular Function	GO:0019843	6	rRNA binding	0.187439	P62913	154	0.444	Q1	K	60S ribosomal protein L11 OS=Homo sapiens OX=9606 GN=RPL11 PE=1 SV=2	RPL11	1	0.00103955	91.265	TGCIGAK(1)HR	2	2.3436	4	1.448	1.571	1.488	0.692	0.657	0.653	0.444	1.57191e-05
Molecular Function	GO:0019843	6	rRNA binding	0.187439	P62913	78	0.41	Q1	K	60S ribosomal protein L11 OS=Homo sapiens OX=9606 GN=RPL11 PE=1 SV=2	RPL11	1	0.000209308	113.24	GAK(1)AEEILEK	3	-0.66035	2	1.542	1.548	1.561	0.673	0.623	0.613	0.41	0.00105979
Molecular Function	GO:0019843	6	rRNA binding	0.187439	Q9Y3A5	125	0.318	Q1	K	Ribosome maturation protein SBDS OS=Homo sapiens OX=9606 GN=SBDS PE=1 SV=4	SBDS	1	6.05362e-05	138.08	CVNPETK(1)R	2	-2.5384	1	1.73	1.732	1.626	0.554	0.563	0.499	0.318	1.59596e-05
Molecular Function	GO:0019843	6	rRNA binding	0.187439	P84098	21	0.205	Q1	K	60S ribosomal protein L19 OS=Homo sapiens OX=9606 GN=RPL19 PE=1 SV=1	RPL19	1	5.79857e-05	79.62	K(1)VWLDPNETNEIANANSR	2	0.17639	2	1.99	1.872	1.878	0.357	0.357	0.46	0.205	5.5867e-05
Molecular Function	GO:0019843	6	rRNA binding	0.187439	P62701	120	0.464	Q1	K	40S ribosomal protein S4, X isoform OS=Homo sapiens OX=9606 GN=RPS4X PE=1 SV=2	RPS4X	1	0.001407	96.342	ITPEEAK(1)YK	2	0.314	3	1.488	1.467	1.475	0.722	0.668	0.667	0.464	0.00118412
Molecular Function	GO:0043022	5	ribosome binding	0.00956985	Q8TEQ6	860	0.481	Q1	K	Gem-associated protein 5 OS=Homo sapiens OX=9606 GN=GEMIN5 PE=1 SV=3	GEMIN5	1	1.41616e-06	104.88	SK(1)EELHQDCLVLATAK	3	-0.75026	1	1.465	1.457	1.445	0.692	0.739	0.668	0.481	0.00165687
Molecular Function	GO:0043022	5	ribosome binding	0.00956985	Q8TEQ6	1390	0.329	Q1	K	Gem-associated protein 5 OS=Homo sapiens OX=9606 GN=GEMIN5 PE=1 SV=3	GEMIN5	1	0.000373398	101.65	QHQK(1)SQLCK	3	-1.7575	1	1.637	1.637	1.75	0.557	0.576	0.521	0.329	3.6375e-06
Molecular Function	GO:0043022	5	ribosome binding	0.00956985	Q9GZV4	27	0.482	Q1	K	Eukaryotic translation initiation factor 5A-2 OS=Homo sapiens OX=9606 GN=EIF5A2 PE=1 SV=3	EIF5A2	1	0.033182	76.064	K(1)NGFVVLK	3	-0.01779	2	1.424	1.491	1.449	0.743	0.761	0.599	0.482	0.00068034
Molecular Function	GO:0043022	5	ribosome binding	0.00956985	Q9GZV4	34	0.247	Q1	K	Eukaryotic translation initiation factor 5A-2 OS=Homo sapiens OX=9606 GN=EIF5A2 PE=1 SV=3	EIF5A2	1	0.000289488	93.096	KNGFVVLK(1)GR	3	0.33973	4	1.911	1.741	1.829	0.459	0.442	0.452	0.247	5.5759e-07
Molecular Function	GO:0043022	5	ribosome binding	0.00956985	Q9BXJ9	467	0.44	Q1	K	N-alpha-acetyltransferase 15, NatA auxiliary subunit OS=Homo sapiens OX=9606 GN=NAA15 PE=1 SV=1	NAA15	1	8.59677e-08	135.02	EAEEMCSK(1)FTR	2	-1.4602	1	1.458	1.487	1.573	0.609	0.707	0.674	0.44	7.8711e-05
Molecular Function	GO:0043022	5	ribosome binding	0.00956985	P13639	571	0.45	Q1	K	Elongation factor 2 OS=Homo sapiens OX=9606 GN=EEF2 PE=1 SV=4	EEF2	1	3.14699e-17	154.28	DLEEDHACIPIK(1)K	2	-0.69618	3	1.467	1.535	1.479	0.652	0.65	0.715	0.45	1.99925e-05
Molecular Function	GO:0043022	5	ribosome binding	0.00956985	P13639	594	0.491	Q1	K	Elongation factor 2 OS=Homo sapiens OX=9606 GN=EEF2 PE=1 SV=4	EEF2	1	1.69803e-09	110.12	ETVSEESNVLCLSK(1)SPNK	3	-0.52971	1	1.437	1.587	1.307	0.754	0.662	0.709	0.491	0.00046028
Molecular Function	GO:0043022	5	ribosome binding	0.00956985	Q92616	793	0.441	Q1	K	eIF-2-alpha kinase activator GCN1 OS=Homo sapiens OX=9606 GN=GCN1 PE=1 SV=6	GCN1	1	0.0122105	60.91	ANMK(1)RENK	2	-2.2334	1	1.609	1.454	1.461	0.646	0.676	0.673	0.441	2.114e-05
Molecular Function	GO:0043022	5	ribosome binding	0.00956985	Q9Y3A5	125	0.318	Q1	K	Ribosome maturation protein SBDS OS=Homo sapiens OX=9606 GN=SBDS PE=1 SV=4	SBDS	1	6.05362e-05	138.08	CVNPETK(1)R	2	-2.5384	1	1.73	1.732	1.626	0.554	0.563	0.499	0.318	1.59596e-05
Molecular Function	GO:0016864	5	intramolecular oxidoreductase activity, transposing S-S bonds	0.269966	P30101	94	0.42	Q1	K	Protein disulfide-isomerase A3 OS=Homo sapiens OX=9606 GN=PDIA3 PE=1 SV=4	PDIA3	1	3.5914e-41	161.47	VDCTANTNTCNK(1)YGVSGYPTLK	4	-0.65929	5	1.559	1.492	1.558	0.681	0.625	0.63	0.42	4.8366e-06
Molecular Function	GO:0016864	5	intramolecular oxidoreductase activity, transposing S-S bonds	0.269966	P30101	415	0.45	Q1	K	Protein disulfide-isomerase A3 OS=Homo sapiens OX=9606 GN=PDIA3 PE=1 SV=4	PDIA3	1	0.0215894	85.676	NLEPK(1)YK	3	0.15336	4	1.566	1.535	1.386	0.673	0.669	0.679	0.45	0.0022784
Molecular Function	GO:0016864	5	intramolecular oxidoreductase activity, transposing S-S bonds	0.269966	P30101	82	0.469	Q1	K	Protein disulfide-isomerase A3 OS=Homo sapiens OX=9606 GN=PDIA3 PE=1 SV=4	PDIA3	1	6.15521e-11	117.18	GIVPLAK(1)VDCTANTNTCNK	3	-0.14257	4	1.365	1.513	1.526	0.693	0.669	0.704	0.469	4.061e-05
Molecular Function	GO:0016864	5	intramolecular oxidoreductase activity, transposing S-S bonds	0.269966	P07237	308	0.278	Q1	K	Protein disulfide-isomerase OS=Homo sapiens OX=9606 GN=P4HB PE=1 SV=3	P4HB	1	0.00332344	86.898	ILEFFGLK(1)K	3	-0.031928	2	1.755	1.698	1.841	0.452	0.513	0.506	0.278	1.51387e-05
Molecular Function	GO:0016864	5	intramolecular oxidoreductase activity, transposing S-S bonds	0.269966	P07237	309	0.424	Q1	K	Protein disulfide-isomerase OS=Homo sapiens OX=9606 GN=P4HB PE=1 SV=3	P4HB	1	0.00170122	121.64	K(1)EECPAVR	3	0.4143	2	1.6	1.521	1.471	0.613	0.641	0.691	0.424	3.7866e-05
Molecular Function	GO:0019210	5	kinase inhibitor activity	0.0622441	O75367	304	0.372	Q1	K	Core histone macro-H2A.1 OS=Homo sapiens OX=9606 GN=H2AFY PE=1 SV=4	H2AFY	1	0.000144859	116.24	NCLALADDK(1)K	2	0.39339	2	1.634	1.692	1.494	0.556	0.613	0.622	0.372	4.0974e-05
Molecular Function	GO:0019210	5	kinase inhibitor activity	0.0622441	P10644	367	0.327	Q1	K	cAMP-dependent protein kinase type I-alpha regulatory subunit OS=Homo sapiens OX=9606 GN=PRKAR1A PE=1 SV=1	PRKAR1A	1	6.36671e-05	106.67	VLGPCSDILK(1)R	2	-0.67679	1	1.637	1.64	1.76	0.573	0.538	0.536	0.327	2.0587e-06
Molecular Function	GO:0019210	5	kinase inhibitor activity	0.0622441	P13861	379	0.477	Q1	K	cAMP-dependent protein kinase type II-alpha regulatory subunit OS=Homo sapiens OX=9606 GN=PRKAR2A PE=1 SV=2	PRKAR2A	1	0.00222902	71.03	LLGPCMDIMK(1)R	3	-0.51879	2	1.403	1.491	1.483	0.719	0.659	0.711	0.477	2.2538e-05
Molecular Function	GO:0019210	5	kinase inhibitor activity	0.0622441	Q9UD71	152	0.452	Q1	K	Protein phosphatase 1 regulatory subunit 1B OS=Homo sapiens OX=9606 GN=PPP1R1B PE=1 SV=2	PPP1R1B	1	4.97004e-20	100.86	QSAGQK(1)TTCGQGLEGPWERPPPLDESER	3	-0.61595	2	1.578	1.531	1.369	0.662	0.628	0.736	0.452	0.00023867
Molecular Function	GO:0003857	6	3-hydroxyacyl-CoA dehydrogenase activity	0.269966	P55084	188	0.248	Q1	K	Trifunctional enzyme subunit beta, mitochondrial OS=Homo sapiens OX=9606 GN=HADHB PE=1 SV=3	HADHB	1	0.000377405	113.93	LMLDLNK(1)AK	3	0.19183	2	1.873	1.814	1.785	0.46	0.448	0.449	0.248	5.8526e-08
Molecular Function	GO:0003857	6	3-hydroxyacyl-CoA dehydrogenase activity	0.269966	P55084	293	0.446	Q1	K	Trifunctional enzyme subunit beta, mitochondrial OS=Homo sapiens OX=9606 GN=HADHB PE=1 SV=3	HADHB	1	0.0081807	79.116	LK(1)PAFIK	3	-0.1348	1	1.416	1.582	1.5	0.668	0.666	0.672	0.446	0.00158112
Molecular Function	GO:0003857	6	3-hydroxyacyl-CoA dehydrogenase activity	0.269966	P40939	60	0.394	Q1	K	Trifunctional enzyme subunit alpha, mitochondrial OS=Homo sapiens OX=9606 GN=HADHA PE=1 SV=2	HADHA	1	0.000326831	92.38	INSPNSK(1)VNTLSK	2	1.332	1	1.576	1.647	1.499	0.632	0.583	0.645	0.394	2.1245e-05
Molecular Function	GO:0003857	6	3-hydroxyacyl-CoA dehydrogenase activity	0.269966	P40939	353	0.198	Q1	K	Trifunctional enzyme subunit alpha, mitochondrial OS=Homo sapiens OX=9606 GN=HADHA PE=1 SV=2	HADHA	1	0.00293526	99.442	NK(1)FGAPQK	3	-0.27395	2	2.008	1.903	1.879	0.398	0.379	0.367	0.198	4.0698e-07
Molecular Function	GO:0003857	6	3-hydroxyacyl-CoA dehydrogenase activity	0.269966	P40939	644	0.486	Q1	K	Trifunctional enzyme subunit alpha, mitochondrial OS=Homo sapiens OX=9606 GN=HADHA PE=1 SV=2	HADHA	1	4.34993e-05	101.89	GFYIYQEGVK(1)R	2	-1.1374	3	1.474	1.433	1.437	0.671	0.714	0.728	0.486	1.51598e-05
Molecular Function	GO:0003857	6	3-hydroxyacyl-CoA dehydrogenase activity	0.269966	P40939	411	0.18	Q1	K	Trifunctional enzyme subunit alpha, mitochondrial OS=Homo sapiens OX=9606 GN=HADHA PE=1 SV=2	HADHA	1	0.0197409	87.476	GLNDK(1)VK	2	-0.16327	1	2.009	2.02	1.874	0.359	0.375	0.331	0.18	1.2788e-06
Molecular Function	GO:0032403	4	protein complex binding	0.00517476	Q13576	553	0.379	Q1	K	Ras GTPase-activating-like protein IQGAP2 OS=Homo sapiens OX=9606 GN=IQGAP2 PE=1 SV=4	IQGAP2	1	0.00516444	78.324	K(1)SSDILSVLK	2	-0.62996	1	1.562	1.607	1.618	0.612	0.547	0.655	0.379	5.7146e-05
Molecular Function	GO:0032403	4	protein complex binding	0.00517476	Q13576	273	0.384	Q1	K	Ras GTPase-activating-like protein IQGAP2 OS=Homo sapiens OX=9606 GN=IQGAP2 PE=1 SV=4	IQGAP2	1	0.00160054	85.163	LK(1)NSCISEEER	2	-0.32659	1	1.651	1.654	1.463	0.624	0.568	0.638	0.384	5.9778e-05
Molecular Function	GO:0032403	4	protein complex binding	0.00517476	Q13576	1454	0.478	Q1	K	Ras GTPase-activating-like protein IQGAP2 OS=Homo sapiens OX=9606 GN=IQGAP2 PE=1 SV=4	IQGAP2	1	0.0105865	86.882	TCLDNLK(1)R	2	-0.99215	1	1.5	1.459	1.416	0.707	0.68	0.706	0.478	1.9511e-06
Molecular Function	GO:0032403	4	protein complex binding	0.00517476	Q7L576	516	0.465	Q1	K	Cytoplasmic FMR1-interacting protein 1 OS=Homo sapiens OX=9606 GN=CYFIP1 PE=1 SV=1	CYFIP1	1	2.47216e-06	84.107	K(1)TVCDWETGHEPFNDPALR	3	0.46049	1	1.526	1.529	1.372	0.613	0.778	0.666	0.465	0.00060253
Molecular Function	GO:0032403	4	protein complex binding	0.00517476	P18206	316	0.374	Q1	K	Vinculin OS=Homo sapiens OX=9606 GN=VCL PE=1 SV=4	VCL	1	0.0100094	72.34	VGELCAGK(1)ER	2	-1.6995	1	1.722	1.618	1.478	0.627	0.582	0.593	0.374	3.9318e-05
Molecular Function	GO:0032403	4	protein complex binding	0.00517476	Q92614	1429	0.474	Q1	K	Unconventional myosin-XVIIIa OS=Homo sapiens OX=9606 GN=MYO18A PE=1 SV=3	MYO18A	1	0.000436442	127.84	ALQQLK(1)K	2	0.50423	1	1.45	1.472	1.466	0.671	0.71	0.7	0.474	9.1511e-07
Molecular Function	GO:0032403	4	protein complex binding	0.00517476	P60981	30	0.396	Q1	K	Destrin OS=Homo sapiens OX=9606 GN=DSTN PE=1 SV=3	DSTN	1	0.00172616	93.096	CSTPEEIK(1)K	3	-1.0849	3	1.589	1.587	1.536	0.613	0.602	0.649	0.396	1.6318e-06
Molecular Function	GO:0032403	4	protein complex binding	0.00517476	P47756	57	0.424	Q1	K	F-actin-capping protein subunit beta OS=Homo sapiens OX=9606 GN=CAPZB PE=1 SV=4	CAPZB	1	9.4043e-13	133.47	VVGK(1)DYLLCDYNR	3	-1.9206	2	1.509	1.551	1.529	0.644	0.679	0.623	0.424	2.622e-06
Molecular Function	GO:0032403	4	protein complex binding	0.00517476	Q9UM54	240	0.316	Q1	K	Unconventional myosin-VI OS=Homo sapiens OX=9606 GN=MYO6 PE=1 SV=4	MYO6	1	0.0165223	70.056	ICVQGK(1)EER	2	-0.27571	1	1.747	1.741	1.607	0.539	0.568	0.505	0.316	1.61137e-05
Molecular Function	GO:0032403	4	protein complex binding	0.00517476	Q9UM54	325	0.466	Q1	K	Unconventional myosin-VI OS=Homo sapiens OX=9606 GN=MYO6 PE=1 SV=4	MYO6	1	0.0271518	81.296	MCTAMK(1)K	2	-0.14267	1	1.465	1.483	1.477	0.704	0.711	0.646	0.466	0.00160093
Molecular Function	GO:0032403	4	protein complex binding	0.00517476	P07900	576	0.235	Q1	K	Heat shock protein HSP 90-alpha OS=Homo sapiens OX=9606 GN=HSP90AA1 PE=1 SV=5	HSP90AA1	1	0.00316475	93.096	IMK(1)DILEK	3	0.51489	4	1.881	1.876	1.791	0.418	0.456	0.43	0.235	5.6281e-07
Molecular Function	GO:0032403	4	protein complex binding	0.00517476	Q9Y490	2445	0.279	Q1	K	Talin-1 OS=Homo sapiens OX=9606 GN=TLN1 PE=1 SV=3	TLN1	1	2.8004e-05	114.7	VK(1)ADQDSEAMK	2	-0.094946	1	1.709	1.766	1.815	0.526	0.472	0.478	0.279	2.4271e-06
Molecular Function	GO:0032403	4	protein complex binding	0.00517476	P62826	123	0.484	Q1	K	GTP-binding nuclear protein Ran OS=Homo sapiens OX=9606 GN=RAN PE=1 SV=3	RAN	1	1.12796e-19	139.29	VCENIPIVLCGNK(1)VDIK	3	-0.81793	3	1.435	1.493	1.423	0.688	0.703	0.715	0.484	1.2707e-06
Molecular Function	GO:0032403	4	protein complex binding	0.00517476	Q9UQE7	977	0.44	Q1	K	Structural maintenance of chromosomes protein 3 OS=Homo sapiens OX=9606 GN=SMC3 PE=1 SV=2	SMC3	0.99997	0.0237068	46.88	KLEQCNTELK(1)K	3	1.6771	1	1.475	1.481	1.565	0.661	0.655	0.674	0.44	1.2541e-06
Molecular Function	GO:0032403	4	protein complex binding	0.00517476	P21333	578	0.272	Q1	K	Filamin-A OS=Homo sapiens OX=9606 GN=FLNA PE=1 SV=4	FLNA	1	0.000120036	101.56	VGTECGNQK(1)VR	2	-0.21816	1	1.73	1.815	1.784	0.486	0.476	0.485	0.272	6.0056e-08
Molecular Function	GO:0032403	4	protein complex binding	0.00517476	P21333	2000	0.359	Q1	K	Filamin-A OS=Homo sapiens OX=9606 GN=FLNA PE=1 SV=4	FLNA	1	0.0408648	66.692	EEPCLLK(1)R	2	-0.50213	1	1.675	1.62	1.586	0.582	0.588	0.583	0.359	1.8799e-07
Molecular Function	GO:0032403	4	protein complex binding	0.00517476	P21333	1450	0.495	Q1	K	Filamin-A OS=Homo sapiens OX=9606 GN=FLNA PE=1 SV=4	FLNA	1	0.00011233	90.793	VPVHDVTDASK(1)VK	3	0.48724	1	1.479	1.441	1.393	0.691	0.679	0.764	0.495	6.2437e-05
Molecular Function	GO:0032403	4	protein complex binding	0.00517476	Q13838	162	0.422	Q1	K	Spliceosome RNA helicase DDX39B OS=Homo sapiens OX=9606 GN=DDX39B PE=1 SV=1	DDX39B	1	0.0197688	89.827	KDEEVLK(1)K	2	-0.64126	3	1.559	1.602	1.441	0.667	0.628	0.647	0.422	1.92273e-05
Molecular Function	GO:0032403	4	protein complex binding	0.00517476	Q13838	241	0.44	Q1	K	Spliceosome RNA helicase DDX39B OS=Homo sapiens OX=9606 GN=DDX39B PE=1 SV=1	DDX39B	1	2.52188e-06	104.2	K(1)FMQDPMEIFVDDETK	3	0.192	1	1.517	1.49	1.519	0.687	0.659	0.647	0.44	8.2451e-07
Molecular Function	GO:0032403	4	protein complex binding	0.00517476	Q9ULV4	194	0.308	Q1	K	Coronin-1C OS=Homo sapiens OX=9606 GN=CORO1C PE=1 SV=1	CORO1C	1	0.00320052	69.261	NGSLICTASK(1)DK	2	1.4005	2	1.663	1.722	1.748	0.55	0.503	0.528	0.308	1.2137e-06
Molecular Function	GO:0032403	4	protein complex binding	0.00517476	P63092	8	0.162	Q1	K	Guanine nucleotide-binding protein G(s) subunit alpha isoforms short OS=Homo sapiens OX=9606 GN=GNAS PE=1 SV=1	GNAS	1	0.00017262	97.463	GCLGNSK(1)TEDQR	2	-0.98053	1	2.08	2.045	1.911	0.324	0.323	0.33	0.162	1.3942e-07
Molecular Function	GO:0032403	4	protein complex binding	0.00517476	P13639	571	0.45	Q1	K	Elongation factor 2 OS=Homo sapiens OX=9606 GN=EEF2 PE=1 SV=4	EEF2	1	3.14699e-17	154.28	DLEEDHACIPIK(1)K	2	-0.69618	3	1.467	1.535	1.479	0.652	0.65	0.715	0.45	1.99925e-05
Molecular Function	GO:0032403	4	protein complex binding	0.00517476	P13639	594	0.491	Q1	K	Elongation factor 2 OS=Homo sapiens OX=9606 GN=EEF2 PE=1 SV=4	EEF2	1	1.69803e-09	110.12	ETVSEESNVLCLSK(1)SPNK	3	-0.52971	1	1.437	1.587	1.307	0.754	0.662	0.709	0.491	0.00046028
Molecular Function	GO:0032403	4	protein complex binding	0.00517476	P35579	180	0.355	Q1	K	Myosin-9 OS=Homo sapiens OX=9606 GN=MYH9 PE=1 SV=4	MYH9	1	5.30441e-22	143.04	EDQSILCTGESGAGK(1)TENTK	3	-0.56027	1	1.567	1.76	1.57	0.594	0.577	0.566	0.355	1.72257e-05
Molecular Function	GO:0032403	4	protein complex binding	0.00517476	P35579	565	0.403	Q1	K	Myosin-9 OS=Homo sapiens OX=9606 GN=MYH9 PE=1 SV=4	MYH9	1	0.00243053	54.898	DK(1)ADFCIIHYAGK	3	-0.65742	1	1.575	1.478	1.63	0.589	0.674	0.622	0.403	4.3735e-05
Molecular Function	GO:0032403	4	protein complex binding	0.00517476	P23528	45	0.342	Q1	K	Cofilin-1 OS=Homo sapiens OX=9606 GN=CFL1 PE=1 SV=3	CFL1	1	0.00127427	101.39	K(1)NIILEEGK	2	0.23308	5	1.734	1.655	1.576	0.555	0.587	0.557	0.342	2.6776e-06
Molecular Function	GO:0032403	4	protein complex binding	0.00517476	P23528	44	0.401	Q1	K	Cofilin-1 OS=Homo sapiens OX=9606 GN=CFL1 PE=1 SV=3	CFL1	1	4.72599e-11	153.95	AVLFCLSEDK(1)K	2	-0.65835	3	1.595	1.575	1.523	0.642	0.654	0.585	0.401	1.80522e-05
Molecular Function	GO:0032403	4	protein complex binding	0.00517476	P50570	90	0.247	Q1	K	Dynamin-2 OS=Homo sapiens OX=9606 GN=DNM2 PE=1 SV=2	DNM2	1	0.007979	78.342	K(1)FTDFDEVR	2	-0.55845	1	1.768	1.787	1.917	0.504	0.415	0.435	0.247	2.2772e-05
Molecular Function	GO:0032403	4	protein complex binding	0.00517476	P50454	160	0.454	Q1	K	Serpin H1 OS=Homo sapiens OX=9606 GN=SERPINH1 PE=1 SV=2	SERPINH1	1	4.32455e-11	129.17	QHYNCEHSK(1)INFR	3	0.55646	2	1.446	1.567	1.452	0.654	0.712	0.663	0.454	2.4472e-05
Molecular Function	GO:0032403	4	protein complex binding	0.00517476	Q06124	178	0.256	Q1	K	Tyrosine-protein phosphatase non-receptor type 11 OS=Homo sapiens OX=9606 GN=PTPN11 PE=1 SV=2	PTPN11	1	0.00118893	79.346	CQELK(1)YDVGGGER	2	0.10773	2	1.739	1.852	1.824	0.421	0.505	0.46	0.256	1.83063e-05
Molecular Function	GO:0032403	4	protein complex binding	0.00517476	P40939	60	0.394	Q1	K	Trifunctional enzyme subunit alpha, mitochondrial OS=Homo sapiens OX=9606 GN=HADHA PE=1 SV=2	HADHA	1	0.000326831	92.38	INSPNSK(1)VNTLSK	2	1.332	1	1.576	1.647	1.499	0.632	0.583	0.645	0.394	2.1245e-05
Molecular Function	GO:0032403	4	protein complex binding	0.00517476	P40939	353	0.198	Q1	K	Trifunctional enzyme subunit alpha, mitochondrial OS=Homo sapiens OX=9606 GN=HADHA PE=1 SV=2	HADHA	1	0.00293526	99.442	NK(1)FGAPQK	3	-0.27395	2	2.008	1.903	1.879	0.398	0.379	0.367	0.198	4.0698e-07
Molecular Function	GO:0032403	4	protein complex binding	0.00517476	P40939	644	0.486	Q1	K	Trifunctional enzyme subunit alpha, mitochondrial OS=Homo sapiens OX=9606 GN=HADHA PE=1 SV=2	HADHA	1	4.34993e-05	101.89	GFYIYQEGVK(1)R	2	-1.1374	3	1.474	1.433	1.437	0.671	0.714	0.728	0.486	1.51598e-05
Molecular Function	GO:0032403	4	protein complex binding	0.00517476	P40939	411	0.18	Q1	K	Trifunctional enzyme subunit alpha, mitochondrial OS=Homo sapiens OX=9606 GN=HADHA PE=1 SV=2	HADHA	1	0.0197409	87.476	GLNDK(1)VK	2	-0.16327	1	2.009	2.02	1.874	0.359	0.375	0.331	0.18	1.2788e-06
Molecular Function	GO:0032403	4	protein complex binding	0.00517476	P51970	38	0.266	Q1	K	NADH dehydrogenase [ubiquinone] 1 alpha subcomplex subunit 8 OS=Homo sapiens OX=9606 GN=NDUFA8 PE=1 SV=3	NDUFA8	1	0.00170306	54.09	AAAHHYGAQCDK(1)PNK	3	-0.081265	3	1.827	1.722	1.816	0.446	0.503	0.476	0.266	2.3488e-06
Molecular Function	GO:0032403	4	protein complex binding	0.00517476	Q14847	50	0.459	Q1	K	LIM and SH3 domain protein 1 OS=Homo sapiens OX=9606 GN=LASP1 PE=1 SV=2	LASP1	1	0.010633	57.785	K(1)PYCNAHYPK	3	-0.53436	2	1.432	1.49	1.529	0.706	0.675	0.66	0.459	4.5956e-06
Molecular Function	GO:0032403	4	protein complex binding	0.00517476	P08238	559	0.479	Q1	K	Heat shock protein HSP 90-beta OS=Homo sapiens OX=9606 GN=HSP90AB1 PE=1 SV=4	HSP90AB1	1	0.00072324	111.17	AK(1)FENLCK	3	-0.027707	2	1.508	1.469	1.398	0.714	0.677	0.704	0.479	1.56421e-05
Molecular Function	GO:0032403	4	protein complex binding	0.00517476	P08238	568	0.153	Q1	K	Heat shock protein HSP 90-beta OS=Homo sapiens OX=9606 GN=HSP90AB1 PE=1 SV=4	HSP90AB1	1	0.0129056	82.417	LMK(1)EILDK	2	-0.52759	1	2.117	2.005	1.986	0.335	0.306	0.291	0.153	1.0451e-06
Molecular Function	GO:0032403	4	protein complex binding	0.00517476	P13797	459	0.258	Q1	K	Plastin-3 OS=Homo sapiens OX=9606 GN=PLS3 PE=1 SV=4	PLS3	1	1.38021e-14	145.69	K(1)LENCNYAVELGK	2	1.0384	1	1.869	1.775	1.767	0.46	0.467	0.471	0.258	1.2353e-07
Molecular Function	GO:0032403	4	protein complex binding	0.00517476	P07237	308	0.278	Q1	K	Protein disulfide-isomerase OS=Homo sapiens OX=9606 GN=P4HB PE=1 SV=3	P4HB	1	0.00332344	86.898	ILEFFGLK(1)K	3	-0.031928	2	1.755	1.698	1.841	0.452	0.513	0.506	0.278	1.51387e-05
Molecular Function	GO:0032403	4	protein complex binding	0.00517476	P07237	309	0.424	Q1	K	Protein disulfide-isomerase OS=Homo sapiens OX=9606 GN=P4HB PE=1 SV=3	P4HB	1	0.00170122	121.64	K(1)EECPAVR	3	0.4143	2	1.6	1.521	1.471	0.613	0.641	0.691	0.424	3.7866e-05
Molecular Function	GO:0032403	4	protein complex binding	0.00517476	P43034	360	0.433	Q1	K	Platelet-activating factor acetylhydrolase IB subunit alpha OS=Homo sapiens OX=9606 GN=PAFAH1B1 PE=1 SV=2	PAFAH1B1	1	0.00320332	72.705	FILSCADDK(1)TLR	2	0.75147	1	1.351	1.606	1.584	0.52	0.74	0.704	0.433	0.0023609
Molecular Function	GO:0032403	4	protein complex binding	0.00517476	P35221	120	0.488	Q1	K	Catenin alpha-1 OS=Homo sapiens OX=9606 GN=CTNNA1 PE=1 SV=1	CTNNA1	1	5.50199e-08	107.82	AAAGEFADDPCSSVK(1)R	2	-0.12176	1	1.365	1.42	1.547	0.7	0.659	0.755	0.488	0.000182432
Molecular Function	GO:0032403	4	protein complex binding	0.00517476	P14618	162	0.464	Q1	K	Pyruvate kinase PKM OS=Homo sapiens OX=9606 GN=PKM PE=1 SV=4	PKM	1	6.49953e-05	90.725	CDENILWLDYK(1)NICK	3	-0.11353	1	1.459	1.39	1.578	0.656	0.756	0.643	0.464	0.00025908
Molecular Function	GO:0032403	4	protein complex binding	0.00517476	P14618	322	0.414	Q1	K	Pyruvate kinase PKM OS=Homo sapiens OX=9606 GN=PKM PE=1 SV=4	PKM	1	4.11221e-09	110.12	AGK(1)PVICATQMLESMIK	3	0.3365	2	1.583	1.521	1.528	0.626	0.629	0.664	0.414	1.32e-06
Molecular Function	GO:0042162	7	telomeric DNA binding	0.206365	Q92878	1291	0.388	Q1	K	DNA repair protein RAD50 OS=Homo sapiens OX=9606 GN=RAD50 PE=1 SV=1	RAD50	1	1.56938e-08	143.98	K(1)NIDQCSEIVK	2	0.59487	1	1.599	1.519	1.629	0.586	0.651	0.605	0.388	1.72987e-05
Molecular Function	GO:0042162	7	telomeric DNA binding	0.206365	Q92900	378	0.213	Q1	K	Regulator of nonsense transcripts 1 OS=Homo sapiens OX=9606 GN=UPF1 PE=1 SV=2	UPF1	1	0.000607611	91.961	YK(1)GDLAPLWK	2	-0.82536	3	1.986	1.884	1.816	0.381	0.438	0.394	0.213	3.1039e-06
Molecular Function	GO:0042162	7	telomeric DNA binding	0.206365	P19338	545	0.498	Q1	K	Nucleolin OS=Homo sapiens OX=9606 GN=NCL PE=1 SV=3	NCL	1	4.9615e-05	136.49	EALNSCNK(1)R	3	0.17238	5	1.466	1.461	1.376	0.712	0.722	0.709	0.498	2.6011e-06
Molecular Function	GO:0070491	5	repressing transcription factor binding	0.130308	Q99497	62	0.381	Q1	K	Protein/nucleic acid deglycase DJ-1 OS=Homo sapiens OX=9606 GN=PARK7 PE=1 SV=2	PARK7	1	2.72946e-27	162.29	DVVICPDASLEDAK(1)K	2	-0.16613	1	1.505	1.635	1.635	0.609	0.57	0.638	0.381	2.1387e-05
Molecular Function	GO:0070491	5	repressing transcription factor binding	0.130308	P09429	50	0.498	Q1	K	High mobility group protein B1 OS=Homo sapiens OX=9606 GN=HMGB1 PE=1 SV=3	HMGB1	1	0.0185525	64.567	WK(1)TMSAK	3	-0.52405	1	1.515	1.361	1.429	0.766	0.686	0.694	0.498	0.000119089
Molecular Function	GO:0070491	5	repressing transcription factor binding	0.130308	Q13547	412	0.47	Q1	K	Histone deacetylase 1 OS=Homo sapiens OX=9606 GN=HDAC1 PE=1 SV=1	HDAC1	1	0.00172616	93.096	ISICSSDK(1)R	2	-1.0844	1	1.453	1.472	1.484	0.747	0.681	0.645	0.47	0.0032599
Molecular Function	GO:0001085	5	RNA polymerase II transcription factor binding	0.22532	Q08211	467	0.496	Q1	K	ATP-dependent RNA helicase A OS=Homo sapiens OX=9606 GN=DHX9 PE=1 SV=4	DHX9	1	5.82684e-13	138.19	GEEPGK(1)SCGYSVR	2	0.64535	1	1.347	1.5	1.457	0.733	0.662	0.74	0.496	0.000123788
Molecular Function	GO:0001085	5	RNA polymerase II transcription factor binding	0.22532	P06400	65	0.464	Q1	K	Retinoblastoma-associated protein OS=Homo sapiens OX=9606 GN=RB1 PE=1 SV=2	RB1	1	0.00150538	94.114	LK(1)IPDHVR	3	-0.34904	1	1.381	1.521	1.526	0.796	0.554	0.706	0.464	0.002224
Molecular Function	GO:0001085	5	RNA polymerase II transcription factor binding	0.22532	Q13547	412	0.47	Q1	K	Histone deacetylase 1 OS=Homo sapiens OX=9606 GN=HDAC1 PE=1 SV=1	HDAC1	1	0.00172616	93.096	ISICSSDK(1)R	2	-1.0844	1	1.453	1.472	1.484	0.747	0.681	0.645	0.47	0.0032599
Molecular Function	GO:0001085	5	RNA polymerase II transcription factor binding	0.22532	P22087	102	0.431	Q1	K	rRNA 2'-O-methyltransferase fibrillarin OS=Homo sapiens OX=9606 GN=FBL PE=1 SV=2	FBL	1	0.006593	64.82	GK(1)EDALVTK	3	0.56476	1	1.614	1.463	1.488	0.653	0.625	0.69	0.431	3.7804e-05
Molecular Function	GO:0003985	8	acetyl-CoA C-acetyltransferase activity	0.0210207	P24752	174	0.297	Q1	K	Acetyl-CoA acetyltransferase, mitochondrial OS=Homo sapiens OX=9606 GN=ACAT1 PE=1 SV=1	ACAT1	1	0.000149298	75.018	GSTPYGGVK(1)LEDLIVK	3	0.042257	1	1.807	1.635	1.755	0.54	0.495	0.509	0.297	3.2579e-06
Molecular Function	GO:0003985	8	acetyl-CoA C-acetyltransferase activity	0.0210207	P40939	60	0.394	Q1	K	Trifunctional enzyme subunit alpha, mitochondrial OS=Homo sapiens OX=9606 GN=HADHA PE=1 SV=2	HADHA	1	0.000326831	92.38	INSPNSK(1)VNTLSK	2	1.332	1	1.576	1.647	1.499	0.632	0.583	0.645	0.394	2.1245e-05
Molecular Function	GO:0003985	8	acetyl-CoA C-acetyltransferase activity	0.0210207	P40939	353	0.198	Q1	K	Trifunctional enzyme subunit alpha, mitochondrial OS=Homo sapiens OX=9606 GN=HADHA PE=1 SV=2	HADHA	1	0.00293526	99.442	NK(1)FGAPQK	3	-0.27395	2	2.008	1.903	1.879	0.398	0.379	0.367	0.198	4.0698e-07
Molecular Function	GO:0003985	8	acetyl-CoA C-acetyltransferase activity	0.0210207	P40939	644	0.486	Q1	K	Trifunctional enzyme subunit alpha, mitochondrial OS=Homo sapiens OX=9606 GN=HADHA PE=1 SV=2	HADHA	1	4.34993e-05	101.89	GFYIYQEGVK(1)R	2	-1.1374	3	1.474	1.433	1.437	0.671	0.714	0.728	0.486	1.51598e-05
Molecular Function	GO:0003985	8	acetyl-CoA C-acetyltransferase activity	0.0210207	P40939	411	0.18	Q1	K	Trifunctional enzyme subunit alpha, mitochondrial OS=Homo sapiens OX=9606 GN=HADHA PE=1 SV=2	HADHA	1	0.0197409	87.476	GLNDK(1)VK	2	-0.16327	1	2.009	2.02	1.874	0.359	0.375	0.331	0.18	1.2788e-06
Molecular Function	GO:0016531	8	copper chaperone activity	0.0569954	Q99497	62	0.381	Q1	K	Protein/nucleic acid deglycase DJ-1 OS=Homo sapiens OX=9606 GN=PARK7 PE=1 SV=2	PARK7	1	2.72946e-27	162.29	DVVICPDASLEDAK(1)K	2	-0.16613	1	1.505	1.635	1.635	0.609	0.57	0.638	0.381	2.1387e-05
Molecular Function	GO:0016531	8	copper chaperone activity	0.0569954	Q14061	30	0.314	Q1	K	Cytochrome c oxidase copper chaperone OS=Homo sapiens OX=9606 GN=COX17 PE=1 SV=2	COX17	1	0.000242026	75.911	KPLKPCCACPETK(1)K	4	0.22637	1	1.732	1.742	1.627	0.497	0.553	0.553	0.314	1.50298e-05
Molecular Function	GO:0070035	9	purine NTP-dependent helicase activity	0.139696	Q13838	162	0.422	Q1	K	Spliceosome RNA helicase DDX39B OS=Homo sapiens OX=9606 GN=DDX39B PE=1 SV=1	DDX39B	1	0.0197688	89.827	KDEEVLK(1)K	2	-0.64126	3	1.559	1.602	1.441	0.667	0.628	0.647	0.422	1.92273e-05
Molecular Function	GO:0070035	9	purine NTP-dependent helicase activity	0.139696	Q13838	241	0.44	Q1	K	Spliceosome RNA helicase DDX39B OS=Homo sapiens OX=9606 GN=DDX39B PE=1 SV=1	DDX39B	1	2.52188e-06	104.2	K(1)FMQDPMEIFVDDETK	3	0.192	1	1.517	1.49	1.519	0.687	0.659	0.647	0.44	8.2451e-07
Molecular Function	GO:0070035	9	purine NTP-dependent helicase activity	0.139696	Q08211	467	0.496	Q1	K	ATP-dependent RNA helicase A OS=Homo sapiens OX=9606 GN=DHX9 PE=1 SV=4	DHX9	1	5.82684e-13	138.19	GEEPGK(1)SCGYSVR	2	0.64535	1	1.347	1.5	1.457	0.733	0.662	0.74	0.496	0.000123788
Molecular Function	GO:0070035	9	purine NTP-dependent helicase activity	0.139696	Q9NUU7	343	0.497	Q1	K	ATP-dependent RNA helicase DDX19A OS=Homo sapiens OX=9606 GN=DDX19A PE=1 SV=1	DDX19A	1	6.00522e-10	139.58	K(1)TASWLAAELSK	2	-0.2171	1	1.404	1.445	1.452	0.681	0.735	0.723	0.497	1.52266e-05
Molecular Function	GO:0070035	9	purine NTP-dependent helicase activity	0.139696	Q9GZR7	17	0.492	Q1	K	ATP-dependent RNA helicase DDX24 OS=Homo sapiens OX=9606 GN=DDX24 PE=1 SV=1	DDX24	1	0.00026351	110.92	QSSCGK(1)FQTK	3	0.27018	2	1.411	1.52	1.394	0.754	0.673	0.7	0.492	7.9084e-05
Molecular Function	GO:0070035	9	purine NTP-dependent helicase activity	0.139696	Q92900	378	0.213	Q1	K	Regulator of nonsense transcripts 1 OS=Homo sapiens OX=9606 GN=UPF1 PE=1 SV=2	UPF1	1	0.000607611	91.961	YK(1)GDLAPLWK	2	-0.82536	3	1.986	1.884	1.816	0.381	0.438	0.394	0.213	3.1039e-06
Molecular Function	GO:0070035	9	purine NTP-dependent helicase activity	0.139696	Q92499	234	0.498	Q1	K	ATP-dependent RNA helicase DDX1 OS=Homo sapiens OX=9606 GN=DDX1 PE=1 SV=2	DDX1	1	9.11479e-13	128.71	NQALFPACVLK(1)NAELK	3	0.095706	3	1.391	1.44	1.473	0.764	0.684	0.694	0.498	5.7082e-05
Molecular Function	GO:0070035	9	purine NTP-dependent helicase activity	0.139696	P17844	197	0.252	Q1	K	Probable ATP-dependent RNA helicase DDX5 OS=Homo sapiens OX=9606 GN=DDX5 PE=1 SV=1	DDX5	1	7.68943e-05	102.9	LK(1)STCIYGGAPK	3	-1.9744	2	1.857	1.777	1.81	0.443	0.473	0.458	0.252	2.2599e-07
Molecular Function	GO:0070035	9	purine NTP-dependent helicase activity	0.139696	P17844	351	0.391	Q1	K	Probable ATP-dependent RNA helicase DDX5 OS=Homo sapiens OX=9606 GN=DDX5 PE=1 SV=1	DDX5	1	0.00120581	112.36	TIVFVETK(1)R	2	-0.61373	2	1.629	1.536	1.571	0.611	0.645	0.596	0.391	2.686e-06
Molecular Function	GO:0070035	9	purine NTP-dependent helicase activity	0.139696	O43143	754	0.226	Q1	K	Pre-mRNA-splicing factor ATP-dependent RNA helicase DHX15 OS=Homo sapiens OX=9606 GN=DHX15 PE=1 SV=2	DHX15	1	1.67223e-05	106.32	TCTDIK(1)PEWLVK	3	0.85098	2	1.857	1.853	1.89	0.41	0.462	0.396	0.226	0.00100058
Molecular Function	GO:0031492	7	nucleosomal DNA binding	0.155835	O75367	304	0.372	Q1	K	Core histone macro-H2A.1 OS=Homo sapiens OX=9606 GN=H2AFY PE=1 SV=4	H2AFY	1	0.000144859	116.24	NCLALADDK(1)K	2	0.39339	2	1.634	1.692	1.494	0.556	0.613	0.622	0.372	4.0974e-05
Molecular Function	GO:0031492	7	nucleosomal DNA binding	0.155835	P84243	37	0.422	Q1	K	Histone H3.3 OS=Homo sapiens OX=9606 GN=H3-3A PE=1 SV=2	H3-3A	1	0.000237623	93.623	K(1)SAPSTGGVK(1)K	2	-0.62162	5	1.579	1.45	1.573	0.637	0.664	0.641	0.422	4.7532e-06
Molecular Function	GO:0051018	4	protein kinase A binding	0.0969038	P48436	68	0.344	Q1	K	Transcription factor SOX-9 OS=Homo sapiens OX=9606 GN=SOX9 PE=1 SV=1	SOX9	1	5.87822e-10	139.46	ESEEDK(1)FPVCIR	3	0.51072	2	1.718	1.709	1.526	0.562	0.564	0.579	0.344	1.5787e-05
Molecular Function	GO:0051018	4	protein kinase A binding	0.0969038	P10644	367	0.327	Q1	K	cAMP-dependent protein kinase type I-alpha regulatory subunit OS=Homo sapiens OX=9606 GN=PRKAR1A PE=1 SV=1	PRKAR1A	1	6.36671e-05	106.67	VLGPCSDILK(1)R	2	-0.67679	1	1.637	1.64	1.76	0.573	0.538	0.536	0.327	2.0587e-06
Molecular Function	GO:0051018	4	protein kinase A binding	0.0969038	P13861	379	0.477	Q1	K	cAMP-dependent protein kinase type II-alpha regulatory subunit OS=Homo sapiens OX=9606 GN=PRKAR2A PE=1 SV=2	PRKAR2A	1	0.00222902	71.03	LLGPCMDIMK(1)R	3	-0.51879	2	1.403	1.491	1.483	0.719	0.659	0.711	0.477	2.2538e-05
Molecular Function	GO:0001158	9	enhancer sequence-specific DNA binding	0.130308	P84243	37	0.422	Q1	K	Histone H3.3 OS=Homo sapiens OX=9606 GN=H3-3A PE=1 SV=2	H3-3A	1	0.000237623	93.623	K(1)SAPSTGGVK(1)K	2	-0.62162	5	1.579	1.45	1.573	0.637	0.664	0.641	0.422	4.7532e-06
Molecular Function	GO:0001158	9	enhancer sequence-specific DNA binding	0.130308	P48436	68	0.344	Q1	K	Transcription factor SOX-9 OS=Homo sapiens OX=9606 GN=SOX9 PE=1 SV=1	SOX9	1	5.87822e-10	139.46	ESEEDK(1)FPVCIR	3	0.51072	2	1.718	1.709	1.526	0.562	0.564	0.579	0.344	1.5787e-05
Molecular Function	GO:0001158	9	enhancer sequence-specific DNA binding	0.130308	P23246	291	0.362	Q1	K	Splicing factor, proline- and glutamine-rich OS=Homo sapiens OX=9606 GN=SFPQ PE=1 SV=2	SFPQ	1	8.40845e-05	98.156	RPGEK(1)TYTQR	3	-0.73735	1	1.495	1.709	1.664	0.668	0.613	0.48	0.362	0.0006635
Molecular Function	GO:0050681	8	androgen receptor binding	0.00840266	Q99497	62	0.381	Q1	K	Protein/nucleic acid deglycase DJ-1 OS=Homo sapiens OX=9606 GN=PARK7 PE=1 SV=2	PARK7	1	2.72946e-27	162.29	DVVICPDASLEDAK(1)K	2	-0.16613	1	1.505	1.635	1.635	0.609	0.57	0.638	0.381	2.1387e-05
Molecular Function	GO:0050681	8	androgen receptor binding	0.00840266	P06400	65	0.464	Q1	K	Retinoblastoma-associated protein OS=Homo sapiens OX=9606 GN=RB1 PE=1 SV=2	RB1	1	0.00150538	94.114	LK(1)IPDHVR	3	-0.34904	1	1.381	1.521	1.526	0.796	0.554	0.706	0.464	0.002224
Molecular Function	GO:0050681	8	androgen receptor binding	0.00840266	Q9Y4C1	394	0.051	Q1	K	Lysine-specific demethylase 3A OS=Homo sapiens OX=9606 GN=KDM3A PE=1 SV=4	KDM3A	1	2.7563e-08	109.55	GSCTQPK(1)TNTDQENR	2	-0.4553	2	2.311	2.263	2.376	0.069	0.155	0.131	0.051	0.0065788
Molecular Function	GO:0050681	8	androgen receptor binding	0.00840266	P62826	123	0.484	Q1	K	GTP-binding nuclear protein Ran OS=Homo sapiens OX=9606 GN=RAN PE=1 SV=3	RAN	1	1.12796e-19	139.29	VCENIPIVLCGNK(1)VDIK	3	-0.81793	3	1.435	1.493	1.423	0.688	0.703	0.715	0.484	1.2707e-06
Molecular Function	GO:0050681	8	androgen receptor binding	0.00840266	P17844	197	0.252	Q1	K	Probable ATP-dependent RNA helicase DDX5 OS=Homo sapiens OX=9606 GN=DDX5 PE=1 SV=1	DDX5	1	7.68943e-05	102.9	LK(1)STCIYGGAPK	3	-1.9744	2	1.857	1.777	1.81	0.443	0.473	0.458	0.252	2.2599e-07
Molecular Function	GO:0050681	8	androgen receptor binding	0.00840266	P17844	351	0.391	Q1	K	Probable ATP-dependent RNA helicase DDX5 OS=Homo sapiens OX=9606 GN=DDX5 PE=1 SV=1	DDX5	1	0.00120581	112.36	TIVFVETK(1)R	2	-0.61373	2	1.629	1.536	1.571	0.611	0.645	0.596	0.391	2.686e-06
Molecular Function	GO:0048029	4	monosaccharide binding	0.247465	P04075	140	0.462	Q1	K	Fructose-bisphosphate aldolase A OS=Homo sapiens OX=9606 GN=ALDOA PE=1 SV=2	ALDOA	1	0.0246193	73.499	K(1)DGADFAK	3	0.18494	2	1.579	1.444	1.418	0.69	0.684	0.679	0.462	0.00189588
Molecular Function	GO:0048029	4	monosaccharide binding	0.247465	P11717	1285	0.431	Q1	K	Cation-independent mannose-6-phosphate receptor OS=Homo sapiens OX=9606 GN=IGF2R PE=1 SV=3	IGF2R	1	0.0187544	68.657	VVSSCQEK(1)R	2	-1.3987	1	1.571	1.542	1.451	0.618	0.683	0.664	0.431	2.2521e-05
Molecular Function	GO:0048029	4	monosaccharide binding	0.247465	Q16851	127	0.404	Q1	K	UTP--glucose-1-phosphate uridylyltransferase OS=Homo sapiens OX=9606 GN=UGP2 PE=1 SV=5	UGP2	1	0.0249755	64.906	GPK(1)SLIGVR	2	-0.065317	1	1.654	1.554	1.473	0.636	0.597	0.658	0.404	3.639e-05
Molecular Function	GO:0016668	5	oxidoreductase activity, acting on a sulfur group of donors, NAD(P) as acceptor	0.269966	P09622	66	0.426	Q1	K	Dihydrolipoyl dehydrogenase, mitochondrial OS=Homo sapiens OX=9606 GN=DLD PE=1 SV=2	DLD	1	6.84578e-17	148.57	AAQLGFK(1)TVCIEK	2	0.7406	2	1.537	1.514	1.534	0.697	0.632	0.626	0.426	0.00164226
Molecular Function	GO:0016668	5	oxidoreductase activity, acting on a sulfur group of donors, NAD(P) as acceptor	0.269966	P00390	470	0.244	Q1	K	Glutathione reductase, mitochondrial OS=Homo sapiens OX=9606 GN=GSR PE=1 SV=2	GSR	1	0.00839172	77.662	MVCANK(1)EEK	2	1.8422	1	1.889	1.889	1.721	0.46	0.463	0.417	0.244	3.3348e-06
Molecular Function	GO:0031748	7	D1 dopamine receptor binding	0.0569954	Q06124	178	0.256	Q1	K	Tyrosine-protein phosphatase non-receptor type 11 OS=Homo sapiens OX=9606 GN=PTPN11 PE=1 SV=2	PTPN11	1	0.00118893	79.346	CQELK(1)YDVGGGER	2	0.10773	2	1.739	1.852	1.824	0.421	0.505	0.46	0.256	1.83063e-05
Molecular Function	GO:0031748	7	D1 dopamine receptor binding	0.0569954	Q9UD71	152	0.452	Q1	K	Protein phosphatase 1 regulatory subunit 1B OS=Homo sapiens OX=9606 GN=PPP1R1B PE=1 SV=2	PPP1R1B	1	4.97004e-20	100.86	QSAGQK(1)TTCGQGLEGPWERPPPLDESER	3	-0.61595	2	1.578	1.531	1.369	0.662	0.628	0.736	0.452	0.00023867
Molecular Function	GO:0003777	9	microtubule motor activity	0.130308	Q9H0B6	369	0.384	Q1	K	Kinesin light chain 2 OS=Homo sapiens OX=9606 GN=KLC2 PE=1 SV=1	KLC2	1	2.76762e-08	142.38	TK(1)NNLASCYLK	2	-0.26727	1	1.643	1.509	1.614	0.598	0.596	0.637	0.384	4.6155e-06
Molecular Function	GO:0003777	9	microtubule motor activity	0.130308	Q8TD57	2921	0.476	Q1	K	Dynein heavy chain 3, axonemal OS=Homo sapiens OX=9606 GN=DNAH3 PE=2 SV=1	DNAH3	1	0.0106296	49.189	LAAQMQK(1)LNQK	2	-1.4123	1	1.444	1.498	1.439	0.637	0.719	0.728	0.476	7.733e-05
Molecular Function	GO:0003777	9	microtubule motor activity	0.130308	Q9UQE7	977	0.44	Q1	K	Structural maintenance of chromosomes protein 3 OS=Homo sapiens OX=9606 GN=SMC3 PE=1 SV=2	SMC3	0.99997	0.0237068	46.88	KLEQCNTELK(1)K	3	1.6771	1	1.475	1.481	1.565	0.661	0.655	0.674	0.44	1.2541e-06
Molecular Function	GO:0005487	3	nucleocytoplasmic transporter activity	0.384037	Q9HAV4	41	0.321	Q1	K	Exportin-5 OS=Homo sapiens OX=9606 GN=XPO5 PE=1 SV=1	XPO5	1	0.00432488	85.355	FCEEFK(1)EK	3	-0.12728	2	1.76	1.666	1.642	0.532	0.523	0.574	0.321	2.8685e-06
Molecular Function	GO:0005487	3	nucleocytoplasmic transporter activity	0.384037	O14980	103	0.351	Q1	K	Exportin-1 OS=Homo sapiens OX=9606 GN=XPO1 PE=1 SV=1	XPO1	1	0.00322946	107.79	NQCEGIK(1)K	3	-2.6199	2	1.685	1.659	1.58	0.601	0.573	0.553	0.351	2.2658e-06
Molecular Function	GO:0005487	3	nucleocytoplasmic transporter activity	0.384037	O14980	122	0.347	Q1	K	Exportin-1 OS=Homo sapiens OX=9606 GN=XPO1 PE=1 SV=1	XPO1	1	2.0108e-07	125.53	TSSDPTCVEK(1)EK	3	-1.7379	2	1.706	1.593	1.643	0.587	0.569	0.558	0.347	8.8605e-07
Molecular Function	GO:0016278	7	lysine N-methyltransferase activity	0.0676281	Q8NEZ4	758	0.436	Q1	K	Histone-lysine N-methyltransferase 2C OS=Homo sapiens OX=9606 GN=KMT2C PE=1 SV=3	KMT2C	1	1.59482e-15	166.6	DVSYQGGK(1)SIK	2	-0.421	2	1.508	1.513	1.523	0.677	0.667	0.635	0.436	0.00055665
Molecular Function	GO:0016278	7	lysine N-methyltransferase activity	0.0676281	Q9UMN6	926	0.278	Q1	K	Histone-lysine N-methyltransferase 2B OS=Homo sapiens OX=9606 GN=KMT2B PE=1 SV=1	KMT2B	1	1.13152e-13	91.079	GK(1)VEAAGPGGESEPTGSGGTLAHTPR	3	-0.28959	1	1.528	1.636	2.129	0.557	0.644	0.271	0.278	0.0095622
Molecular Function	GO:0016278	7	lysine N-methyltransferase activity	0.0676281	P61964	159	0.483	Q1	K	WD repeat-containing protein 5 OS=Homo sapiens OX=9606 GN=WDR5 PE=1 SV=1	WDR5	1	0.0091824	88.495	IWDVK(1)TGK	3	0.80805	2	1.444	1.439	1.473	0.691	0.714	0.7	0.483	2.2067e-07
Molecular Function	GO:0016509	7	long-chain-3-hydroxyacyl-CoA dehydrogenase activity	0.0569954	P55084	188	0.248	Q1	K	Trifunctional enzyme subunit beta, mitochondrial OS=Homo sapiens OX=9606 GN=HADHB PE=1 SV=3	HADHB	1	0.000377405	113.93	LMLDLNK(1)AK	3	0.19183	2	1.873	1.814	1.785	0.46	0.448	0.449	0.248	5.8526e-08
Molecular Function	GO:0016509	7	long-chain-3-hydroxyacyl-CoA dehydrogenase activity	0.0569954	P55084	293	0.446	Q1	K	Trifunctional enzyme subunit beta, mitochondrial OS=Homo sapiens OX=9606 GN=HADHB PE=1 SV=3	HADHB	1	0.0081807	79.116	LK(1)PAFIK	3	-0.1348	1	1.416	1.582	1.5	0.668	0.666	0.672	0.446	0.00158112
Molecular Function	GO:0016509	7	long-chain-3-hydroxyacyl-CoA dehydrogenase activity	0.0569954	P40939	60	0.394	Q1	K	Trifunctional enzyme subunit alpha, mitochondrial OS=Homo sapiens OX=9606 GN=HADHA PE=1 SV=2	HADHA	1	0.000326831	92.38	INSPNSK(1)VNTLSK	2	1.332	1	1.576	1.647	1.499	0.632	0.583	0.645	0.394	2.1245e-05
Molecular Function	GO:0016509	7	long-chain-3-hydroxyacyl-CoA dehydrogenase activity	0.0569954	P40939	353	0.198	Q1	K	Trifunctional enzyme subunit alpha, mitochondrial OS=Homo sapiens OX=9606 GN=HADHA PE=1 SV=2	HADHA	1	0.00293526	99.442	NK(1)FGAPQK	3	-0.27395	2	2.008	1.903	1.879	0.398	0.379	0.367	0.198	4.0698e-07
Molecular Function	GO:0016509	7	long-chain-3-hydroxyacyl-CoA dehydrogenase activity	0.0569954	P40939	644	0.486	Q1	K	Trifunctional enzyme subunit alpha, mitochondrial OS=Homo sapiens OX=9606 GN=HADHA PE=1 SV=2	HADHA	1	4.34993e-05	101.89	GFYIYQEGVK(1)R	2	-1.1374	3	1.474	1.433	1.437	0.671	0.714	0.728	0.486	1.51598e-05
Molecular Function	GO:0016509	7	long-chain-3-hydroxyacyl-CoA dehydrogenase activity	0.0569954	P40939	411	0.18	Q1	K	Trifunctional enzyme subunit alpha, mitochondrial OS=Homo sapiens OX=9606 GN=HADHA PE=1 SV=2	HADHA	1	0.0197409	87.476	GLNDK(1)VK	2	-0.16327	1	2.009	2.02	1.874	0.359	0.375	0.331	0.18	1.2788e-06
Molecular Function	GO:0019887	5	protein kinase regulator activity	0.104114	O75367	304	0.372	Q1	K	Core histone macro-H2A.1 OS=Homo sapiens OX=9606 GN=H2AFY PE=1 SV=4	H2AFY	1	0.000144859	116.24	NCLALADDK(1)K	2	0.39339	2	1.634	1.692	1.494	0.556	0.613	0.622	0.372	4.0974e-05
Molecular Function	GO:0019887	5	protein kinase regulator activity	0.104114	P08238	559	0.479	Q1	K	Heat shock protein HSP 90-beta OS=Homo sapiens OX=9606 GN=HSP90AB1 PE=1 SV=4	HSP90AB1	1	0.00072324	111.17	AK(1)FENLCK	3	-0.027707	2	1.508	1.469	1.398	0.714	0.677	0.704	0.479	1.56421e-05
Molecular Function	GO:0019887	5	protein kinase regulator activity	0.104114	P08238	568	0.153	Q1	K	Heat shock protein HSP 90-beta OS=Homo sapiens OX=9606 GN=HSP90AB1 PE=1 SV=4	HSP90AB1	1	0.0129056	82.417	LMK(1)EILDK	2	-0.52759	1	2.117	2.005	1.986	0.335	0.306	0.291	0.153	1.0451e-06
Molecular Function	GO:0019887	5	protein kinase regulator activity	0.104114	Q92616	793	0.441	Q1	K	eIF-2-alpha kinase activator GCN1 OS=Homo sapiens OX=9606 GN=GCN1 PE=1 SV=6	GCN1	1	0.0122105	60.91	ANMK(1)RENK	2	-2.2334	1	1.609	1.454	1.461	0.646	0.676	0.673	0.441	2.114e-05
Molecular Function	GO:0019887	5	protein kinase regulator activity	0.104114	P10644	367	0.327	Q1	K	cAMP-dependent protein kinase type I-alpha regulatory subunit OS=Homo sapiens OX=9606 GN=PRKAR1A PE=1 SV=1	PRKAR1A	1	6.36671e-05	106.67	VLGPCSDILK(1)R	2	-0.67679	1	1.637	1.64	1.76	0.573	0.538	0.536	0.327	2.0587e-06
Molecular Function	GO:0019887	5	protein kinase regulator activity	0.104114	P13861	379	0.477	Q1	K	cAMP-dependent protein kinase type II-alpha regulatory subunit OS=Homo sapiens OX=9606 GN=PRKAR2A PE=1 SV=2	PRKAR2A	1	0.00222902	71.03	LLGPCMDIMK(1)R	3	-0.51879	2	1.403	1.491	1.483	0.719	0.659	0.711	0.477	2.2538e-05
Molecular Function	GO:0019887	5	protein kinase regulator activity	0.104114	Q9UD71	152	0.452	Q1	K	Protein phosphatase 1 regulatory subunit 1B OS=Homo sapiens OX=9606 GN=PPP1R1B PE=1 SV=2	PPP1R1B	1	4.97004e-20	100.86	QSAGQK(1)TTCGQGLEGPWERPPPLDESER	3	-0.61595	2	1.578	1.531	1.369	0.662	0.628	0.736	0.452	0.00023867
Molecular Function	GO:0045505	4	dynein intermediate chain binding	0.0569954	P43034	360	0.433	Q1	K	Platelet-activating factor acetylhydrolase IB subunit alpha OS=Homo sapiens OX=9606 GN=PAFAH1B1 PE=1 SV=2	PAFAH1B1	1	0.00320332	72.705	FILSCADDK(1)TLR	2	0.75147	1	1.351	1.606	1.584	0.52	0.74	0.704	0.433	0.0023609
Molecular Function	GO:0045505	4	dynein intermediate chain binding	0.0569954	P62826	123	0.484	Q1	K	GTP-binding nuclear protein Ran OS=Homo sapiens OX=9606 GN=RAN PE=1 SV=3	RAN	1	1.12796e-19	139.29	VCENIPIVLCGNK(1)VDIK	3	-0.81793	3	1.435	1.493	1.423	0.688	0.703	0.715	0.484	1.2707e-06
Molecular Function	GO:0016408	6	C-acyltransferase activity	0.0106167	P55084	188	0.248	Q1	K	Trifunctional enzyme subunit beta, mitochondrial OS=Homo sapiens OX=9606 GN=HADHB PE=1 SV=3	HADHB	1	0.000377405	113.93	LMLDLNK(1)AK	3	0.19183	2	1.873	1.814	1.785	0.46	0.448	0.449	0.248	5.8526e-08
Molecular Function	GO:0016408	6	C-acyltransferase activity	0.0106167	P55084	293	0.446	Q1	K	Trifunctional enzyme subunit beta, mitochondrial OS=Homo sapiens OX=9606 GN=HADHB PE=1 SV=3	HADHB	1	0.0081807	79.116	LK(1)PAFIK	3	-0.1348	1	1.416	1.582	1.5	0.668	0.666	0.672	0.446	0.00158112
Molecular Function	GO:0016408	6	C-acyltransferase activity	0.0106167	P24752	174	0.297	Q1	K	Acetyl-CoA acetyltransferase, mitochondrial OS=Homo sapiens OX=9606 GN=ACAT1 PE=1 SV=1	ACAT1	1	0.000149298	75.018	GSTPYGGVK(1)LEDLIVK	3	0.042257	1	1.807	1.635	1.755	0.54	0.495	0.509	0.297	3.2579e-06
Molecular Function	GO:0016408	6	C-acyltransferase activity	0.0106167	P42765	181	0.475	Q1	K	3-ketoacyl-CoA thiolase, mitochondrial OS=Homo sapiens OX=9606 GN=ACAA2 PE=1 SV=2	ACAA2	1	8.6644e-07	114.31	EECDK(1)YALQSQQR	2	-0.088702	2	1.484	1.524	1.379	0.707	0.721	0.658	0.475	5.6749e-05
Molecular Function	GO:0016408	6	C-acyltransferase activity	0.0106167	P40939	60	0.394	Q1	K	Trifunctional enzyme subunit alpha, mitochondrial OS=Homo sapiens OX=9606 GN=HADHA PE=1 SV=2	HADHA	1	0.000326831	92.38	INSPNSK(1)VNTLSK	2	1.332	1	1.576	1.647	1.499	0.632	0.583	0.645	0.394	2.1245e-05
Molecular Function	GO:0016408	6	C-acyltransferase activity	0.0106167	P40939	353	0.198	Q1	K	Trifunctional enzyme subunit alpha, mitochondrial OS=Homo sapiens OX=9606 GN=HADHA PE=1 SV=2	HADHA	1	0.00293526	99.442	NK(1)FGAPQK	3	-0.27395	2	2.008	1.903	1.879	0.398	0.379	0.367	0.198	4.0698e-07
Molecular Function	GO:0016408	6	C-acyltransferase activity	0.0106167	P40939	644	0.486	Q1	K	Trifunctional enzyme subunit alpha, mitochondrial OS=Homo sapiens OX=9606 GN=HADHA PE=1 SV=2	HADHA	1	4.34993e-05	101.89	GFYIYQEGVK(1)R	2	-1.1374	3	1.474	1.433	1.437	0.671	0.714	0.728	0.486	1.51598e-05
Molecular Function	GO:0016408	6	C-acyltransferase activity	0.0106167	P40939	411	0.18	Q1	K	Trifunctional enzyme subunit alpha, mitochondrial OS=Homo sapiens OX=9606 GN=HADHA PE=1 SV=2	HADHA	1	0.0197409	87.476	GLNDK(1)VK	2	-0.16327	1	2.009	2.02	1.874	0.359	0.375	0.331	0.18	1.2788e-06
Molecular Function	GO:0008170	6	N-methyltransferase activity	0.133267	Q8NEZ4	758	0.436	Q1	K	Histone-lysine N-methyltransferase 2C OS=Homo sapiens OX=9606 GN=KMT2C PE=1 SV=3	KMT2C	1	1.59482e-15	166.6	DVSYQGGK(1)SIK	2	-0.421	2	1.508	1.513	1.523	0.677	0.667	0.635	0.436	0.00055665
Molecular Function	GO:0008170	6	N-methyltransferase activity	0.133267	Q9UMN6	926	0.278	Q1	K	Histone-lysine N-methyltransferase 2B OS=Homo sapiens OX=9606 GN=KMT2B PE=1 SV=1	KMT2B	1	1.13152e-13	91.079	GK(1)VEAAGPGGESEPTGSGGTLAHTPR	3	-0.28959	1	1.528	1.636	2.129	0.557	0.644	0.271	0.278	0.0095622
Molecular Function	GO:0008170	6	N-methyltransferase activity	0.133267	P22087	102	0.431	Q1	K	rRNA 2'-O-methyltransferase fibrillarin OS=Homo sapiens OX=9606 GN=FBL PE=1 SV=2	FBL	1	0.006593	64.82	GK(1)EDALVTK	3	0.56476	1	1.614	1.463	1.488	0.653	0.625	0.69	0.431	3.7804e-05
Molecular Function	GO:0008170	6	N-methyltransferase activity	0.133267	P61964	159	0.483	Q1	K	WD repeat-containing protein 5 OS=Homo sapiens OX=9606 GN=WDR5 PE=1 SV=1	WDR5	1	0.0091824	88.495	IWDVK(1)TGK	3	0.80805	2	1.444	1.439	1.473	0.691	0.714	0.7	0.483	2.2067e-07
Molecular Function	GO:0042054	7	histone methyltransferase activity	0.0445566	Q8NEZ4	758	0.436	Q1	K	Histone-lysine N-methyltransferase 2C OS=Homo sapiens OX=9606 GN=KMT2C PE=1 SV=3	KMT2C	1	1.59482e-15	166.6	DVSYQGGK(1)SIK	2	-0.421	2	1.508	1.513	1.523	0.677	0.667	0.635	0.436	0.00055665
Molecular Function	GO:0042054	7	histone methyltransferase activity	0.0445566	Q9UMN6	926	0.278	Q1	K	Histone-lysine N-methyltransferase 2B OS=Homo sapiens OX=9606 GN=KMT2B PE=1 SV=1	KMT2B	1	1.13152e-13	91.079	GK(1)VEAAGPGGESEPTGSGGTLAHTPR	3	-0.28959	1	1.528	1.636	2.129	0.557	0.644	0.271	0.278	0.0095622
Molecular Function	GO:0042054	7	histone methyltransferase activity	0.0445566	P22087	102	0.431	Q1	K	rRNA 2'-O-methyltransferase fibrillarin OS=Homo sapiens OX=9606 GN=FBL PE=1 SV=2	FBL	1	0.006593	64.82	GK(1)EDALVTK	3	0.56476	1	1.614	1.463	1.488	0.653	0.625	0.69	0.431	3.7804e-05
Molecular Function	GO:0042054	7	histone methyltransferase activity	0.0445566	P61964	159	0.483	Q1	K	WD repeat-containing protein 5 OS=Homo sapiens OX=9606 GN=WDR5 PE=1 SV=1	WDR5	1	0.0091824	88.495	IWDVK(1)TGK	3	0.80805	2	1.444	1.439	1.473	0.691	0.714	0.7	0.483	2.2067e-07
Molecular Function	GO:0030551	6	cyclic nucleotide binding	0.0569954	P10644	367	0.327	Q1	K	cAMP-dependent protein kinase type I-alpha regulatory subunit OS=Homo sapiens OX=9606 GN=PRKAR1A PE=1 SV=1	PRKAR1A	1	6.36671e-05	106.67	VLGPCSDILK(1)R	2	-0.67679	1	1.637	1.64	1.76	0.573	0.538	0.536	0.327	2.0587e-06
Molecular Function	GO:0030551	6	cyclic nucleotide binding	0.0569954	P13861	379	0.477	Q1	K	cAMP-dependent protein kinase type II-alpha regulatory subunit OS=Homo sapiens OX=9606 GN=PRKAR2A PE=1 SV=2	PRKAR2A	1	0.00222902	71.03	LLGPCMDIMK(1)R	3	-0.51879	2	1.403	1.491	1.483	0.719	0.659	0.711	0.477	2.2538e-05
Molecular Function	GO:0016530	2	metallochaperone activity	0.0569954	Q99497	62	0.381	Q1	K	Protein/nucleic acid deglycase DJ-1 OS=Homo sapiens OX=9606 GN=PARK7 PE=1 SV=2	PARK7	1	2.72946e-27	162.29	DVVICPDASLEDAK(1)K	2	-0.16613	1	1.505	1.635	1.635	0.609	0.57	0.638	0.381	2.1387e-05
Molecular Function	GO:0016530	2	metallochaperone activity	0.0569954	Q14061	30	0.314	Q1	K	Cytochrome c oxidase copper chaperone OS=Homo sapiens OX=9606 GN=COX17 PE=1 SV=2	COX17	1	0.000242026	75.911	KPLKPCCACPETK(1)K	4	0.22637	1	1.732	1.742	1.627	0.497	0.553	0.553	0.314	1.50298e-05
Molecular Function	GO:0019955	4	cytokine binding	0.103166	Q99497	62	0.381	Q1	K	Protein/nucleic acid deglycase DJ-1 OS=Homo sapiens OX=9606 GN=PARK7 PE=1 SV=2	PARK7	1	2.72946e-27	162.29	DVVICPDASLEDAK(1)K	2	-0.16613	1	1.505	1.635	1.635	0.609	0.57	0.638	0.381	2.1387e-05
Molecular Function	GO:0019955	4	cytokine binding	0.103166	P09429	50	0.498	Q1	K	High mobility group protein B1 OS=Homo sapiens OX=9606 GN=HMGB1 PE=1 SV=3	HMGB1	1	0.0185525	64.567	WK(1)TMSAK	3	-0.52405	1	1.515	1.361	1.429	0.766	0.686	0.694	0.498	0.000119089
Molecular Function	GO:0016453	7	C-acetyltransferase activity	0.0210207	P24752	174	0.297	Q1	K	Acetyl-CoA acetyltransferase, mitochondrial OS=Homo sapiens OX=9606 GN=ACAT1 PE=1 SV=1	ACAT1	1	0.000149298	75.018	GSTPYGGVK(1)LEDLIVK	3	0.042257	1	1.807	1.635	1.755	0.54	0.495	0.509	0.297	3.2579e-06
Molecular Function	GO:0016453	7	C-acetyltransferase activity	0.0210207	P40939	60	0.394	Q1	K	Trifunctional enzyme subunit alpha, mitochondrial OS=Homo sapiens OX=9606 GN=HADHA PE=1 SV=2	HADHA	1	0.000326831	92.38	INSPNSK(1)VNTLSK	2	1.332	1	1.576	1.647	1.499	0.632	0.583	0.645	0.394	2.1245e-05
Molecular Function	GO:0016453	7	C-acetyltransferase activity	0.0210207	P40939	353	0.198	Q1	K	Trifunctional enzyme subunit alpha, mitochondrial OS=Homo sapiens OX=9606 GN=HADHA PE=1 SV=2	HADHA	1	0.00293526	99.442	NK(1)FGAPQK	3	-0.27395	2	2.008	1.903	1.879	0.398	0.379	0.367	0.198	4.0698e-07
[truncated: 4,900 more rows]

## Sheet: Q3
GO Terms Level 1	GO Terms Description	GO Terms Level	GO Terms ID	Mapping	Background	All Mapping	All Background	Fold Enrichment	Fisher' exact test P value	-log10(p value)	Related Protein
[truncated: 31 more rows]

[truncated: 7 more sheets: Q3 GO2Protein, all, all GO2Protein, Q4, Q4 GO2Protein, Q2, Q2 GO2Protein]
