# Supplementary figures and images for: Differential expression of lysine acetylation proteins in gastric cancer treated with a new antitumor agent bioactive peptide chelate selenium
Source: PeerJ journal article supplement (doi:10.7717/peerj.14384), 2023-01-17

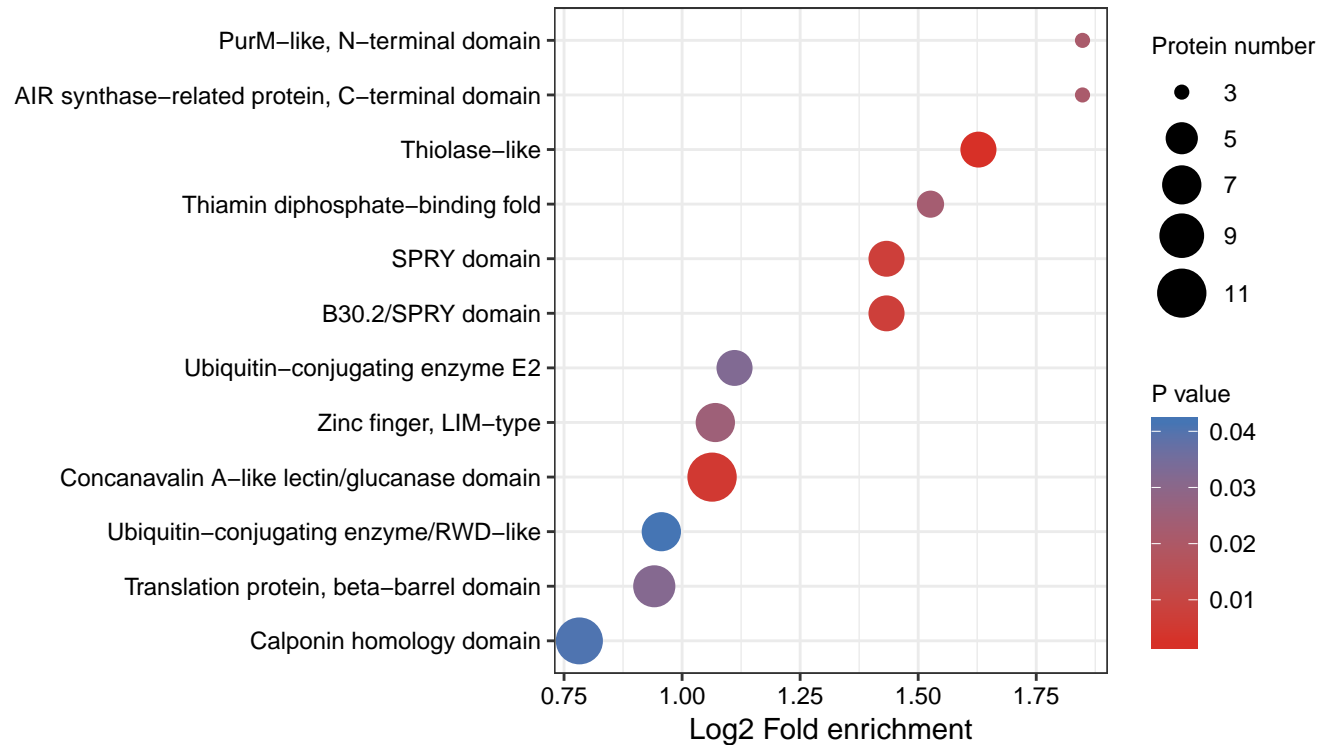

Supplement: Raw_Data.zip [file Raw_Data.zip]

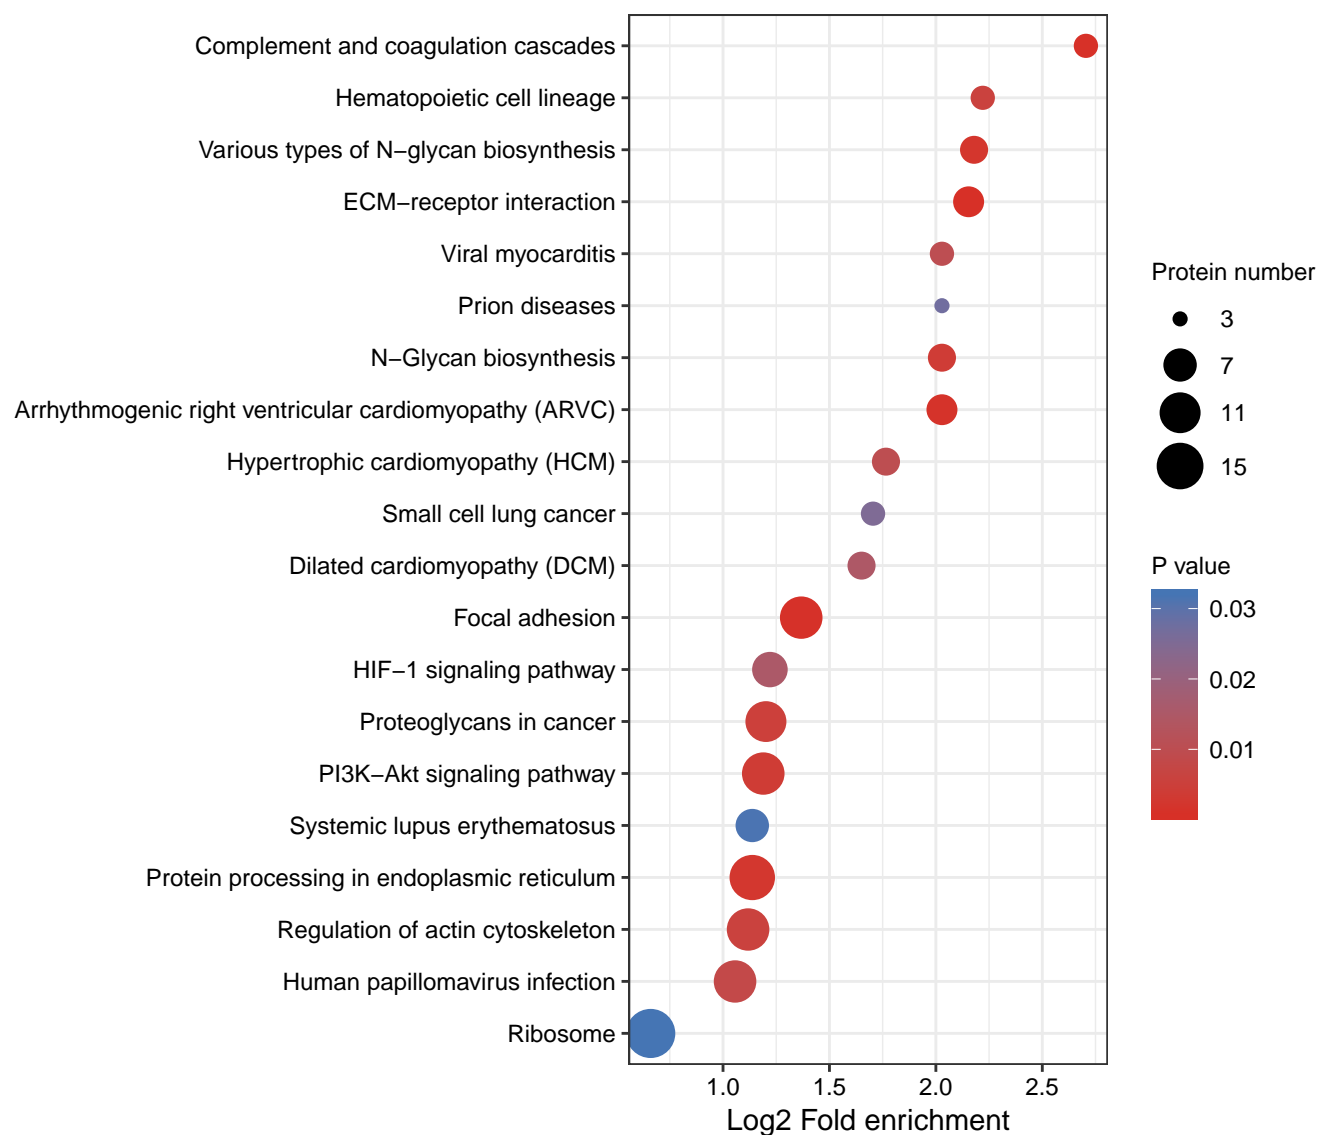

Supplement: Raw_Data.zip [file Raw_Data.zip]

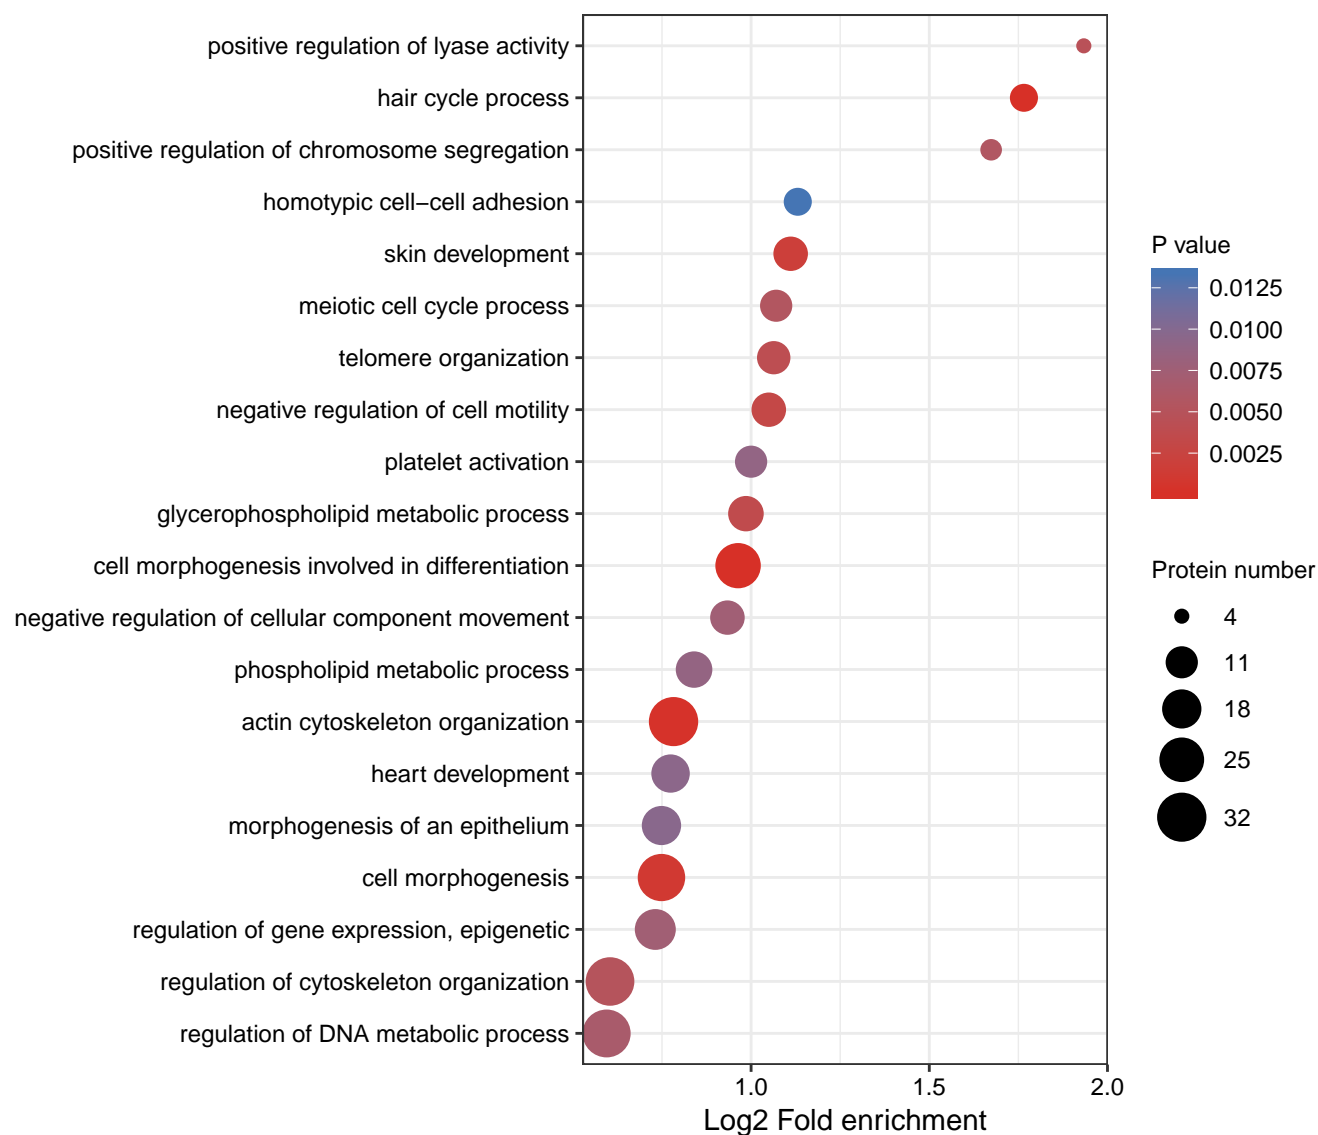

Supplement: Raw_Data.zip [file Raw_Data.zip]

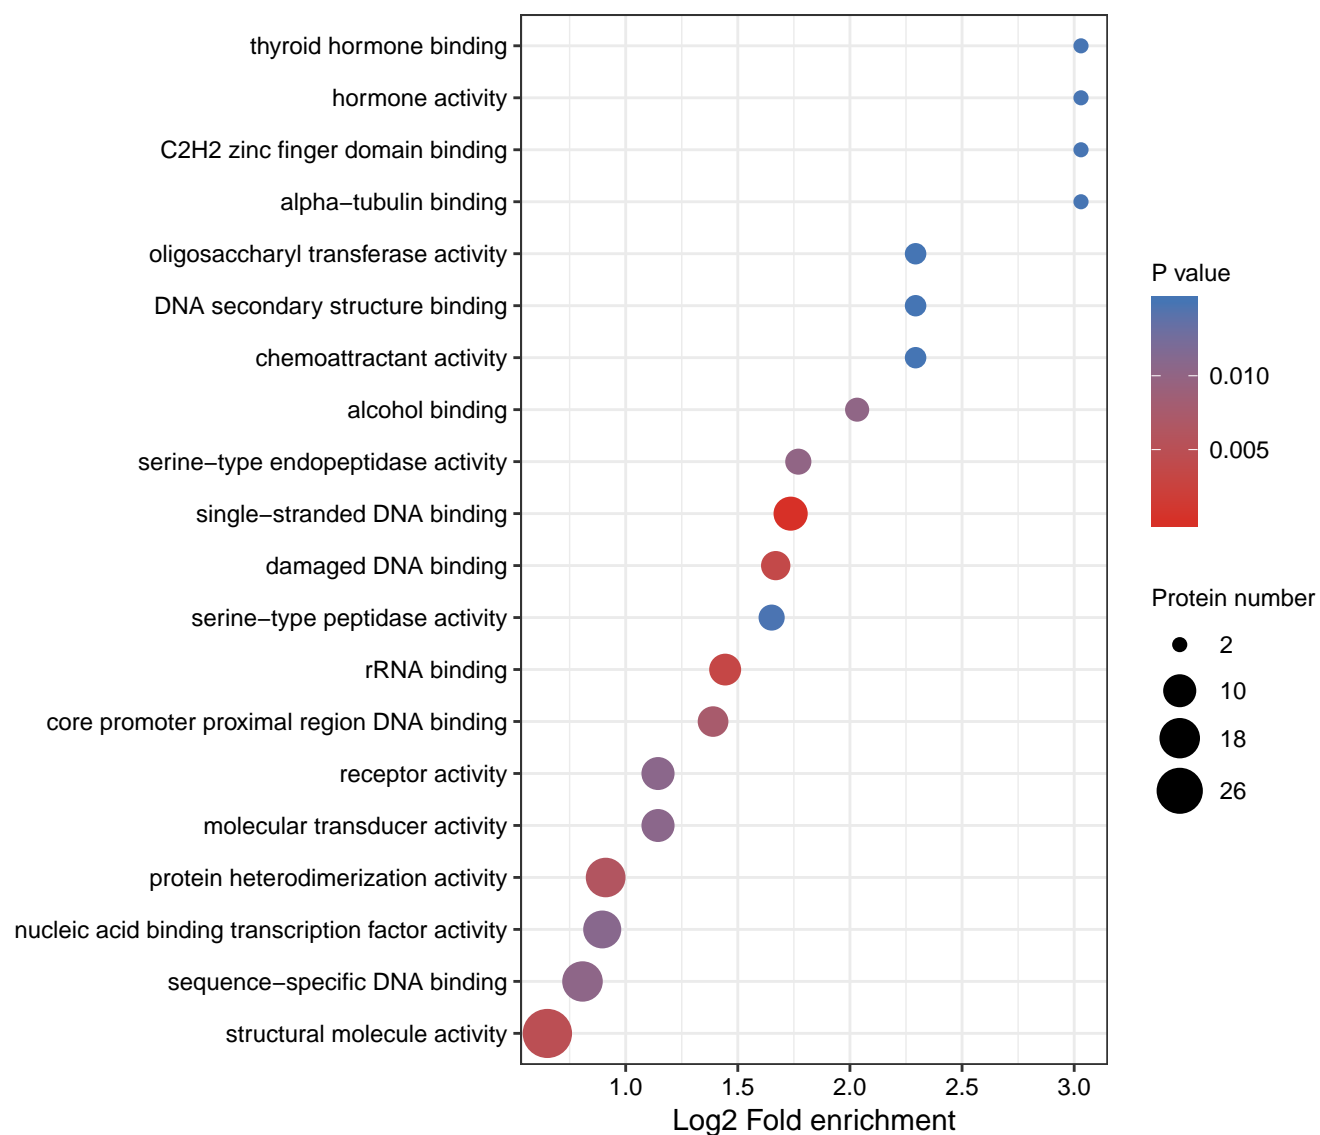

Supplement: Raw_Data.zip [file Raw_Data.zip]

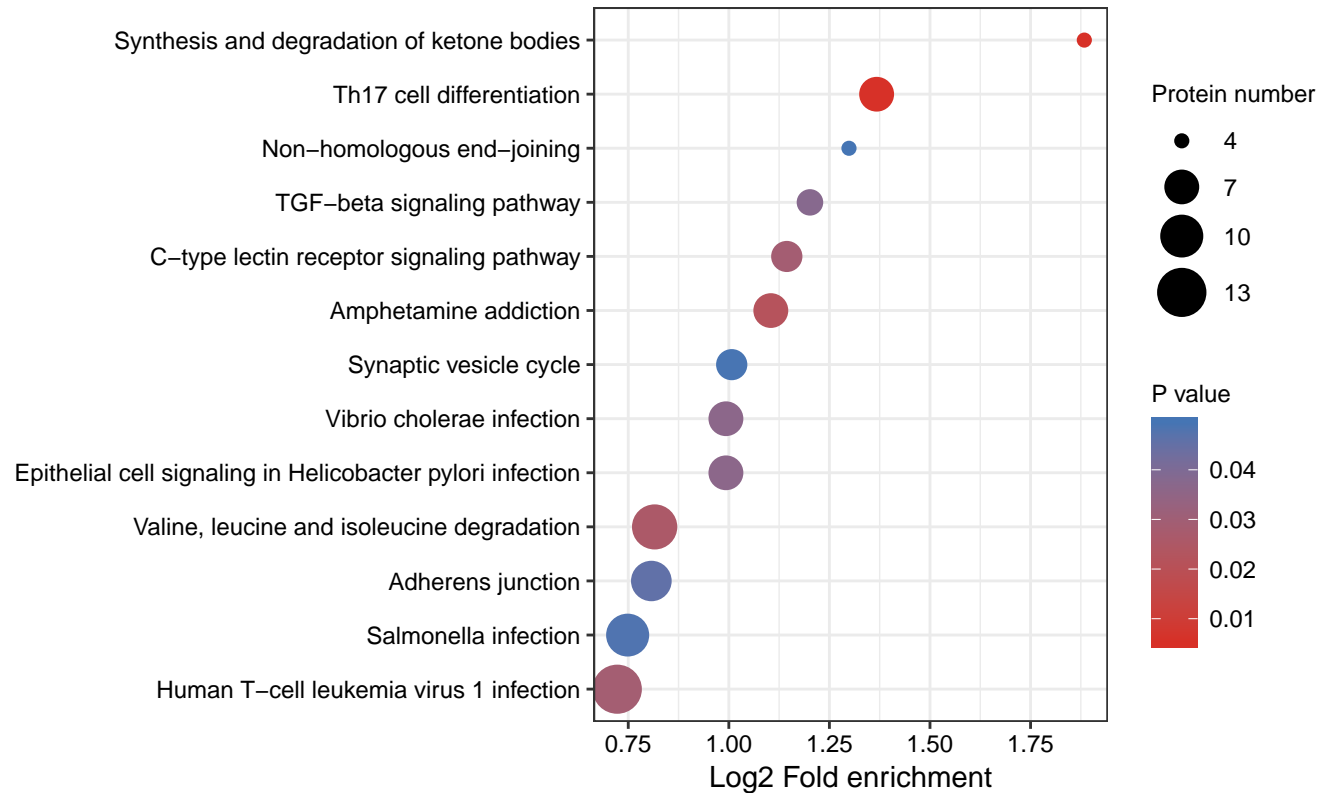

Supplement: Raw_Data.zip [file Raw_Data.zip]

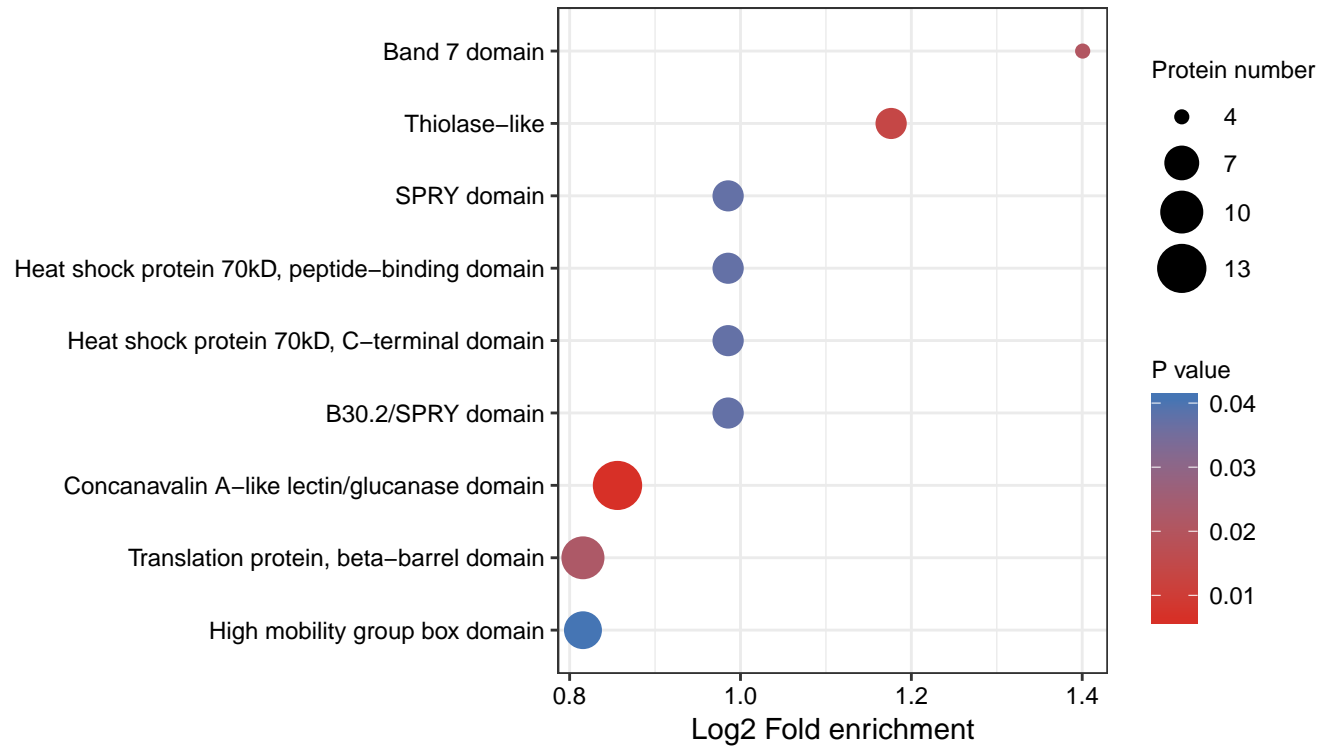

Supplement: Raw_Data.zip [file Raw_Data.zip]

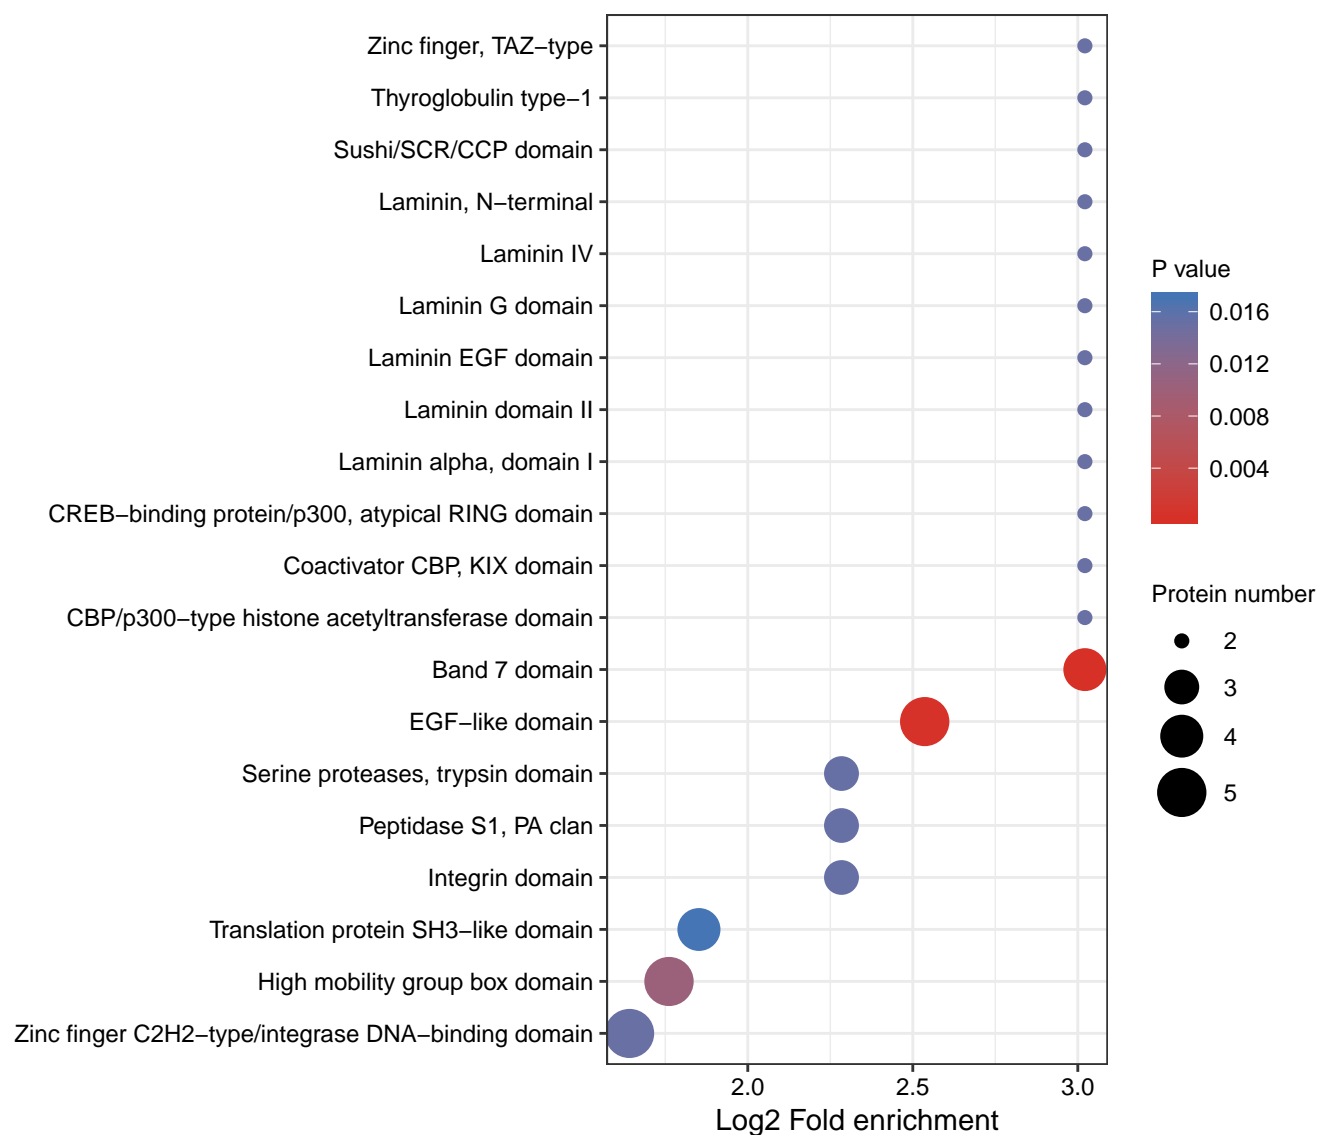

Supplement: Raw_Data.zip [file Raw_Data.zip]

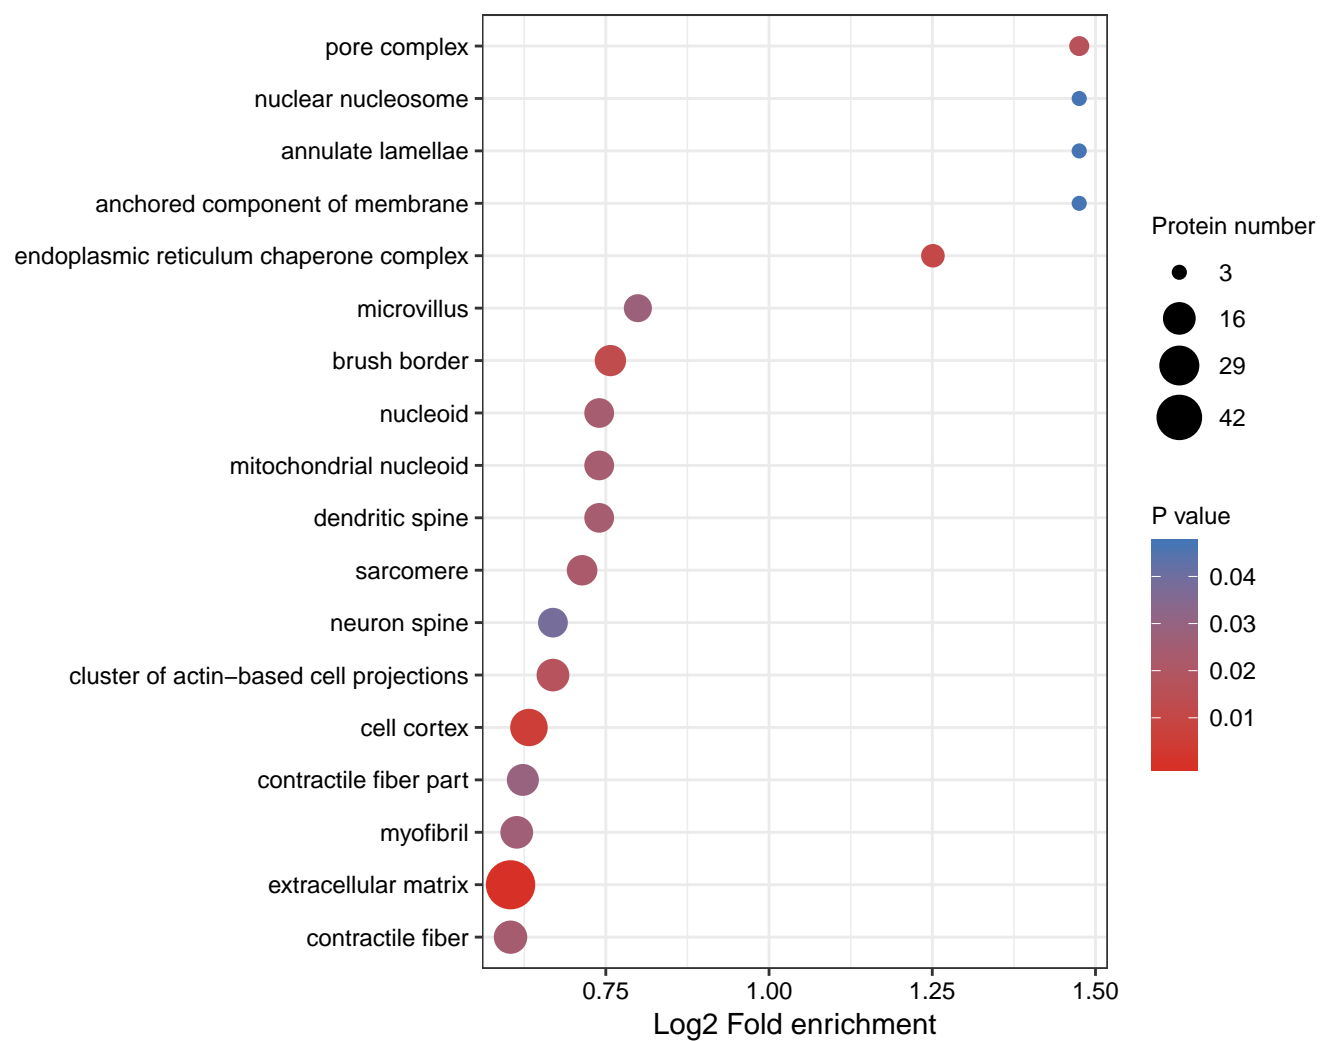

Supplement: Raw_Data.zip [file Raw_Data.zip]

Regulation   ■ Up   ■ Down

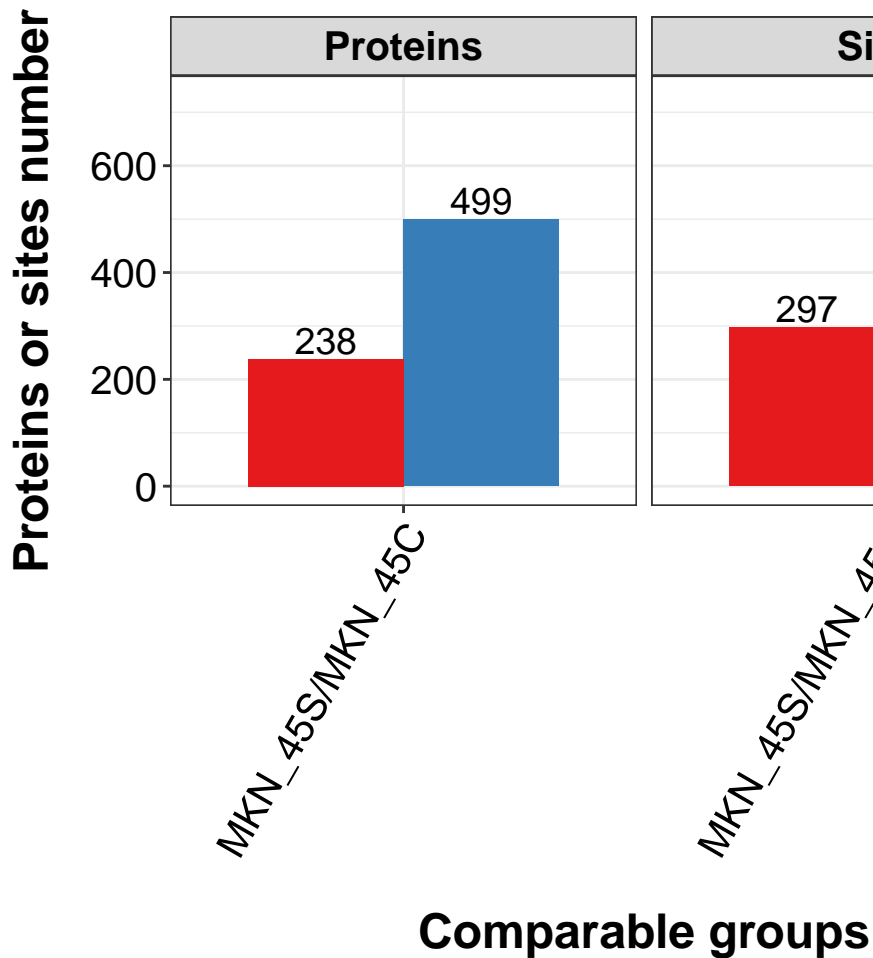

Supplement: Raw_Data.zip [file Raw_Data.zip]

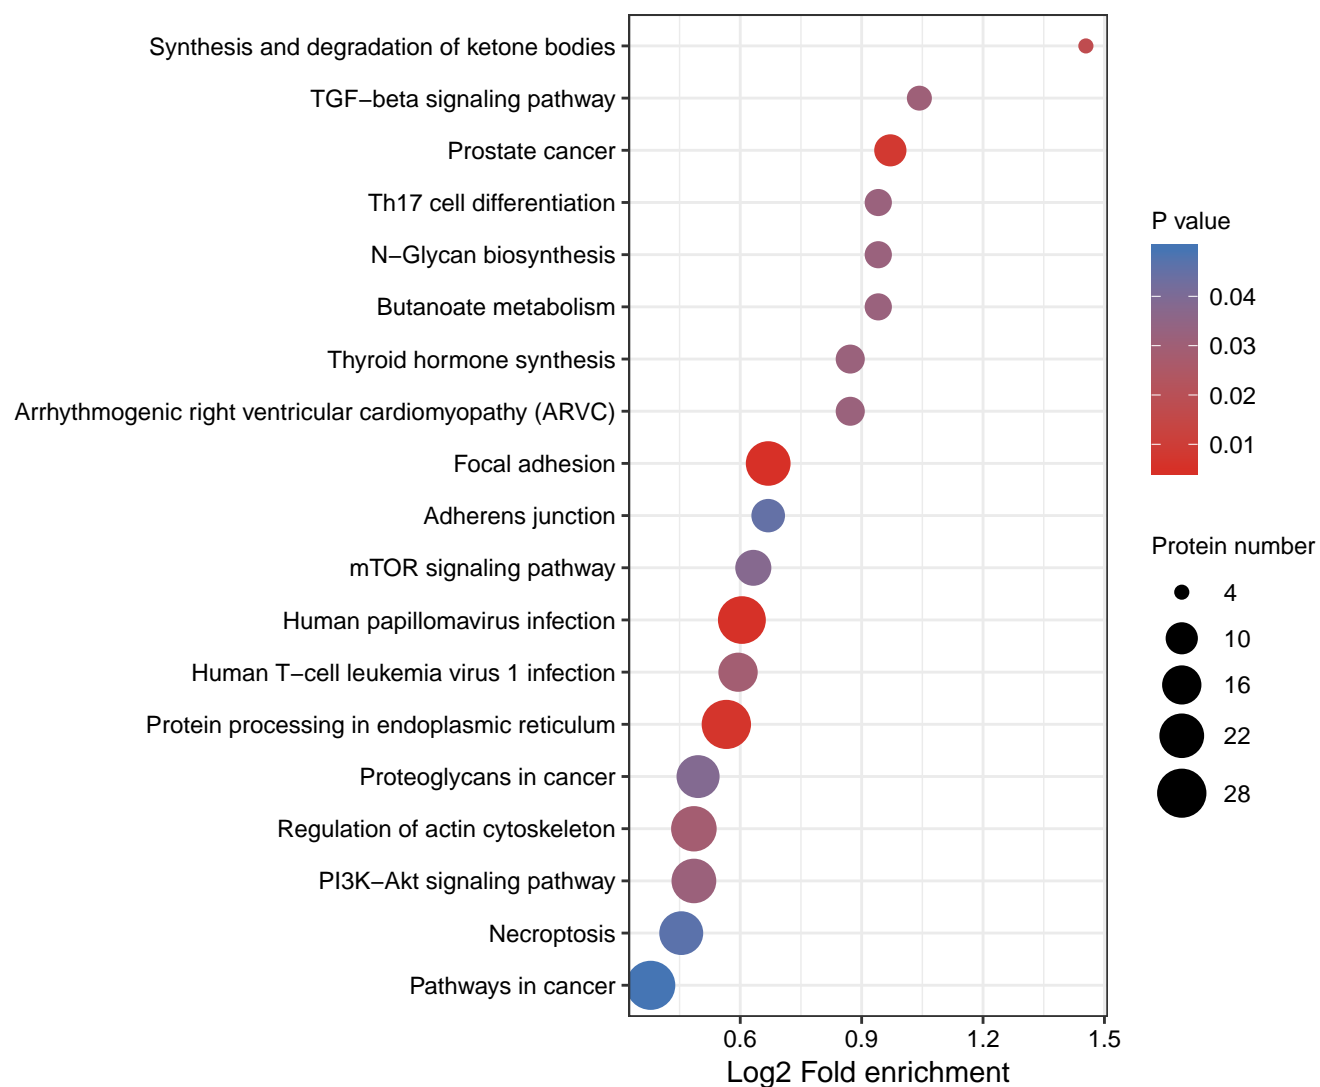

Supplement: Raw_Data.zip [file Raw_Data.zip]

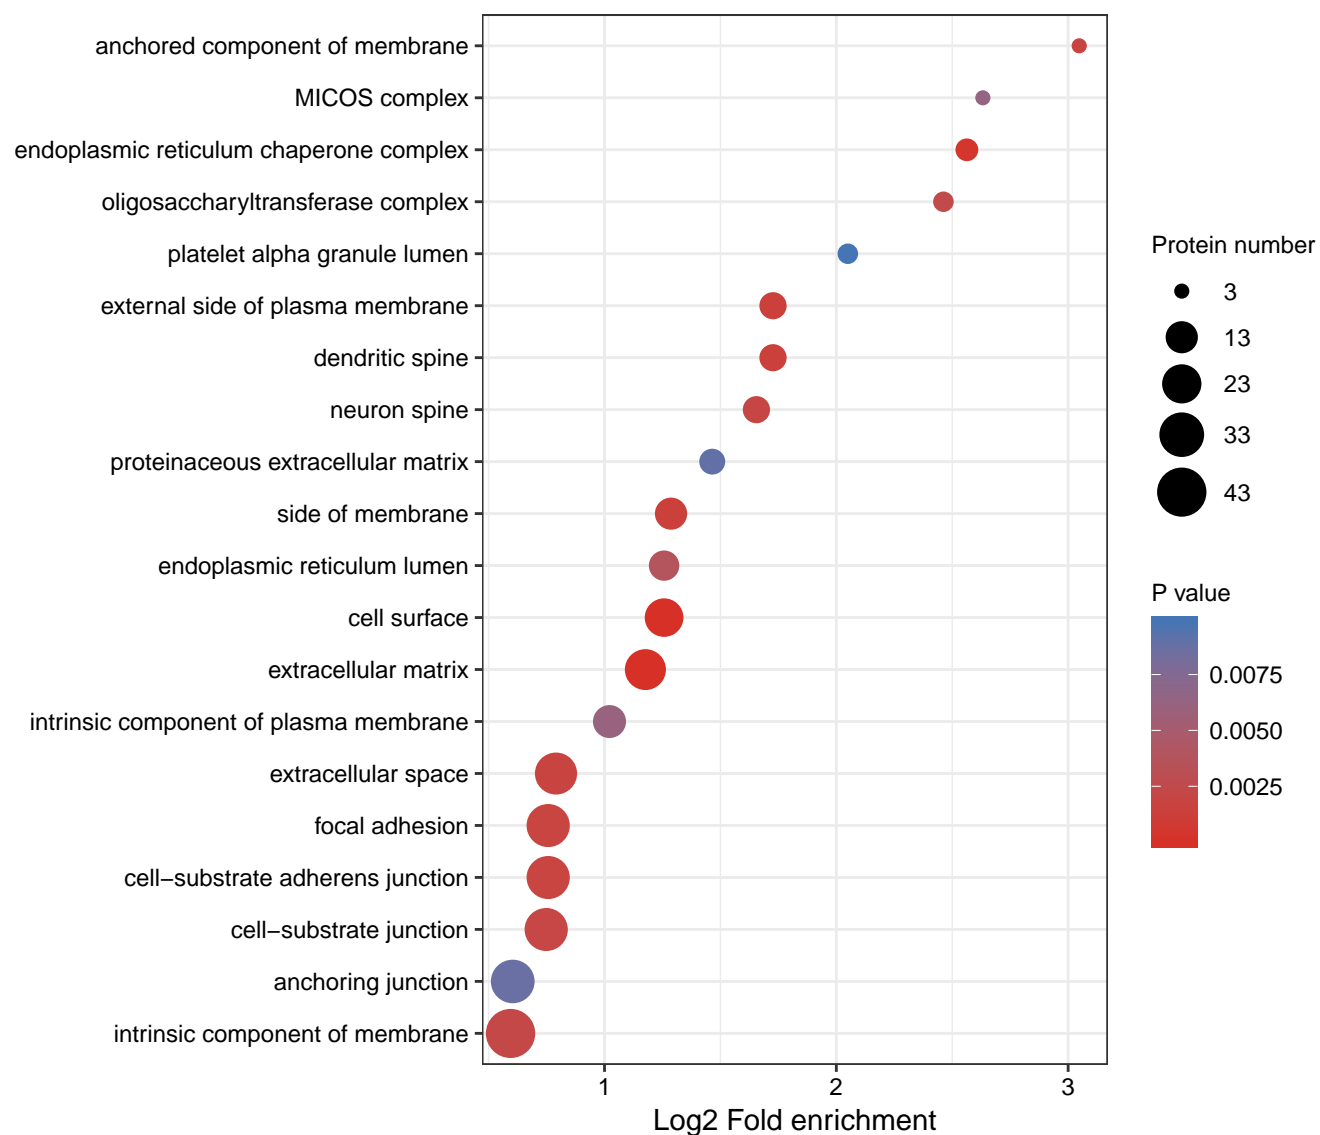

Supplement: Raw_Data.zip [file Raw_Data.zip]

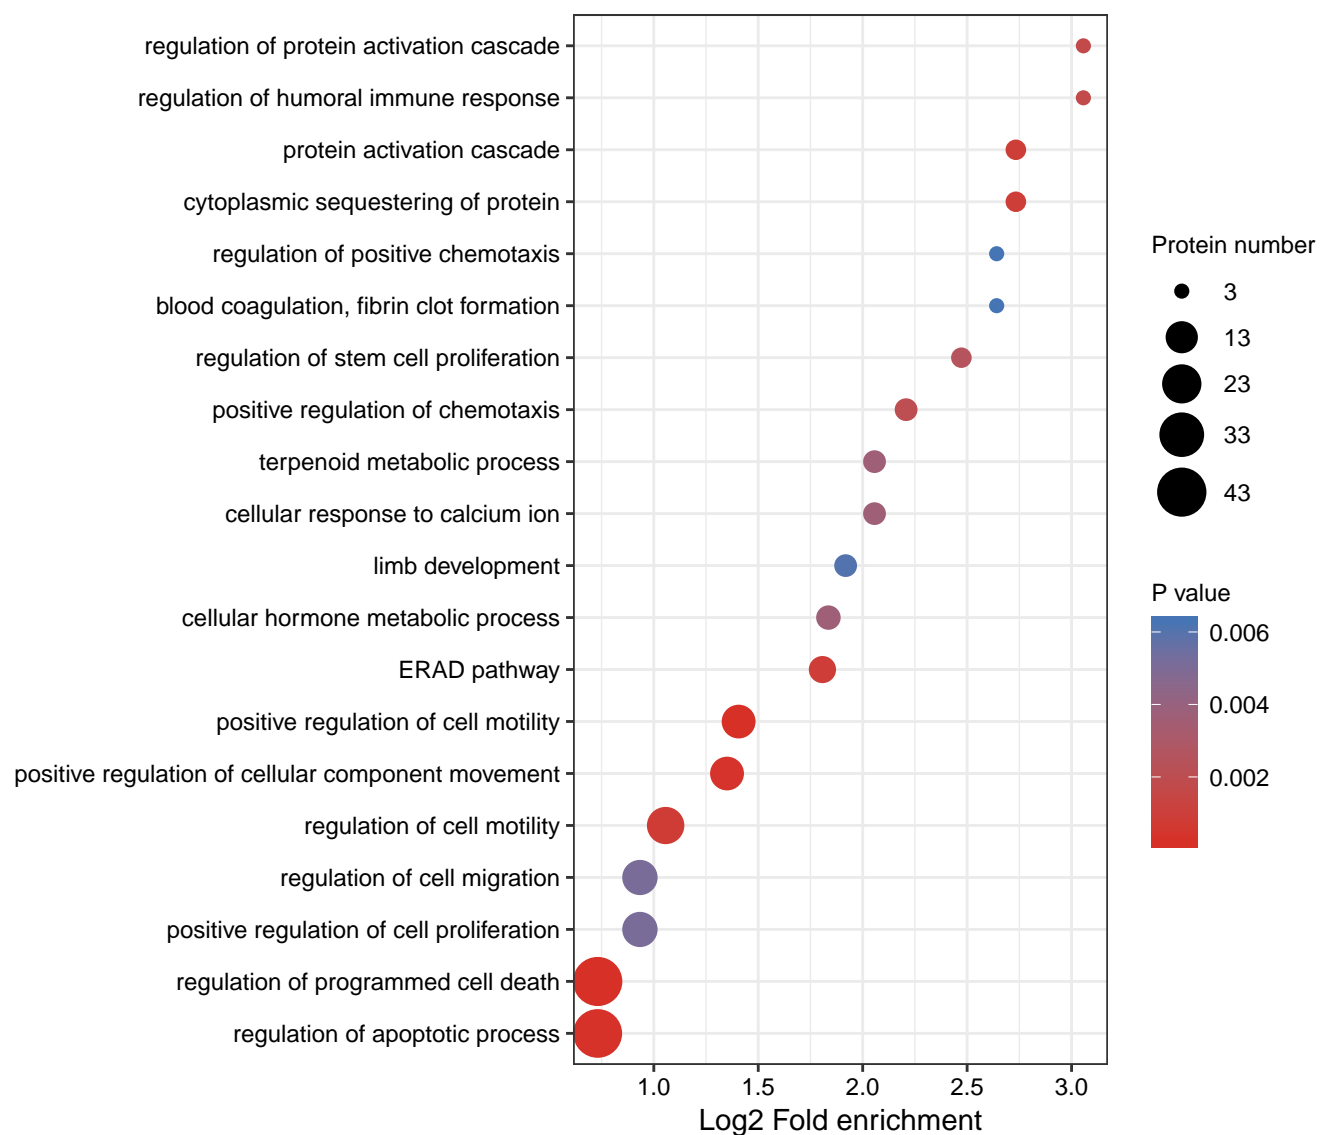

Supplement: Raw_Data.zip [file Raw_Data.zip]

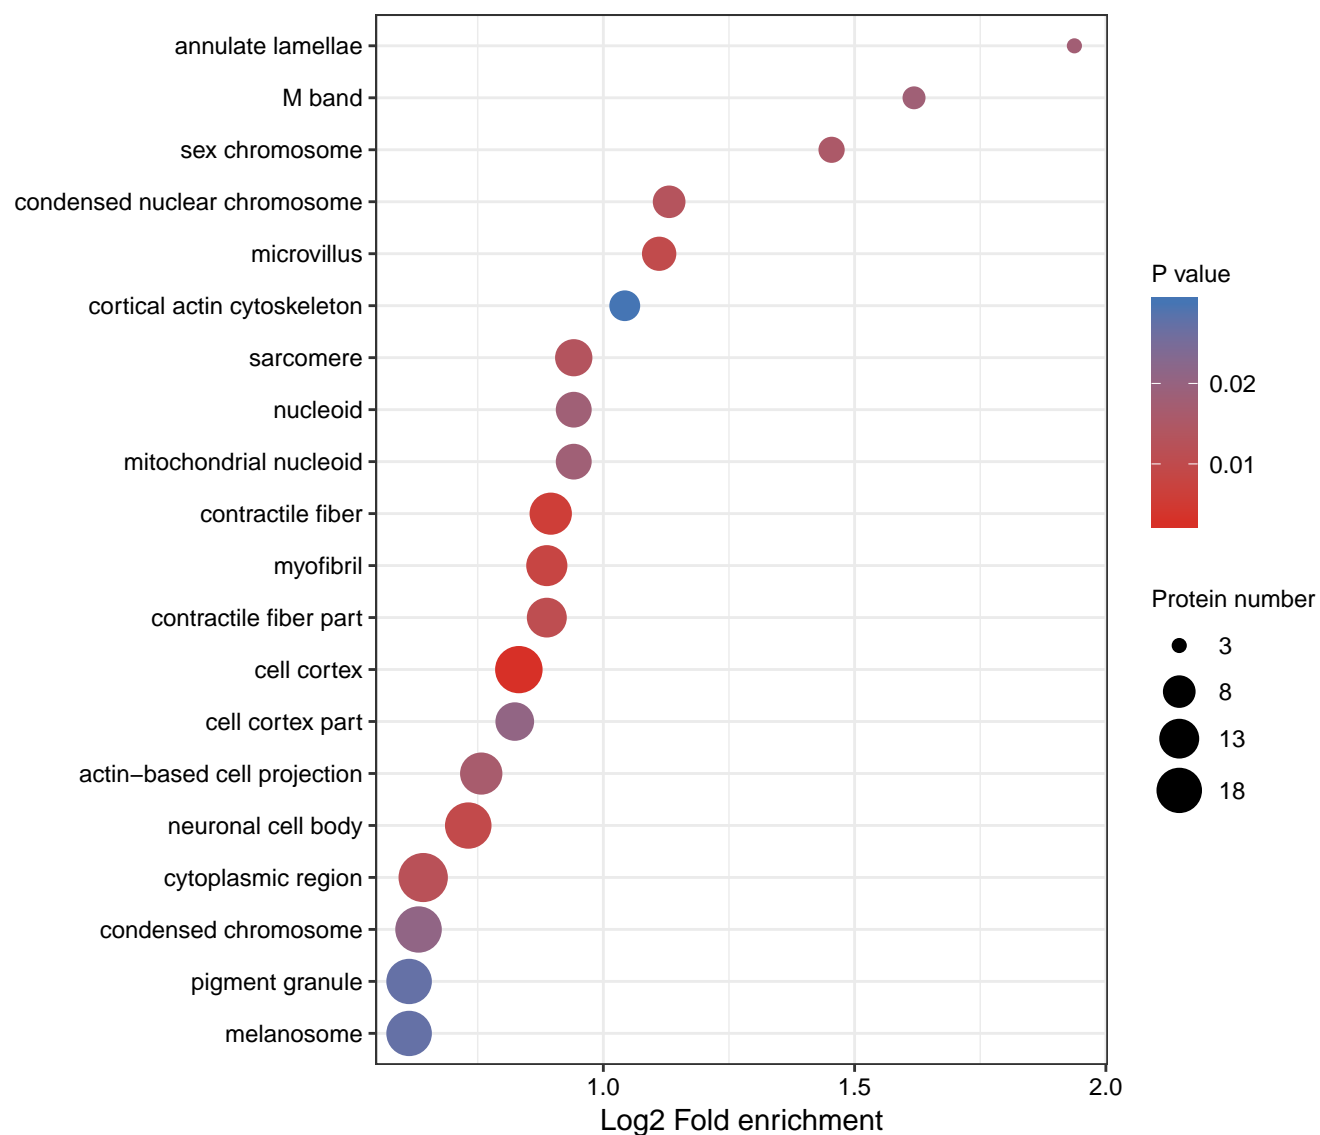

Supplement: Raw_Data.zip [file Raw_Data.zip]

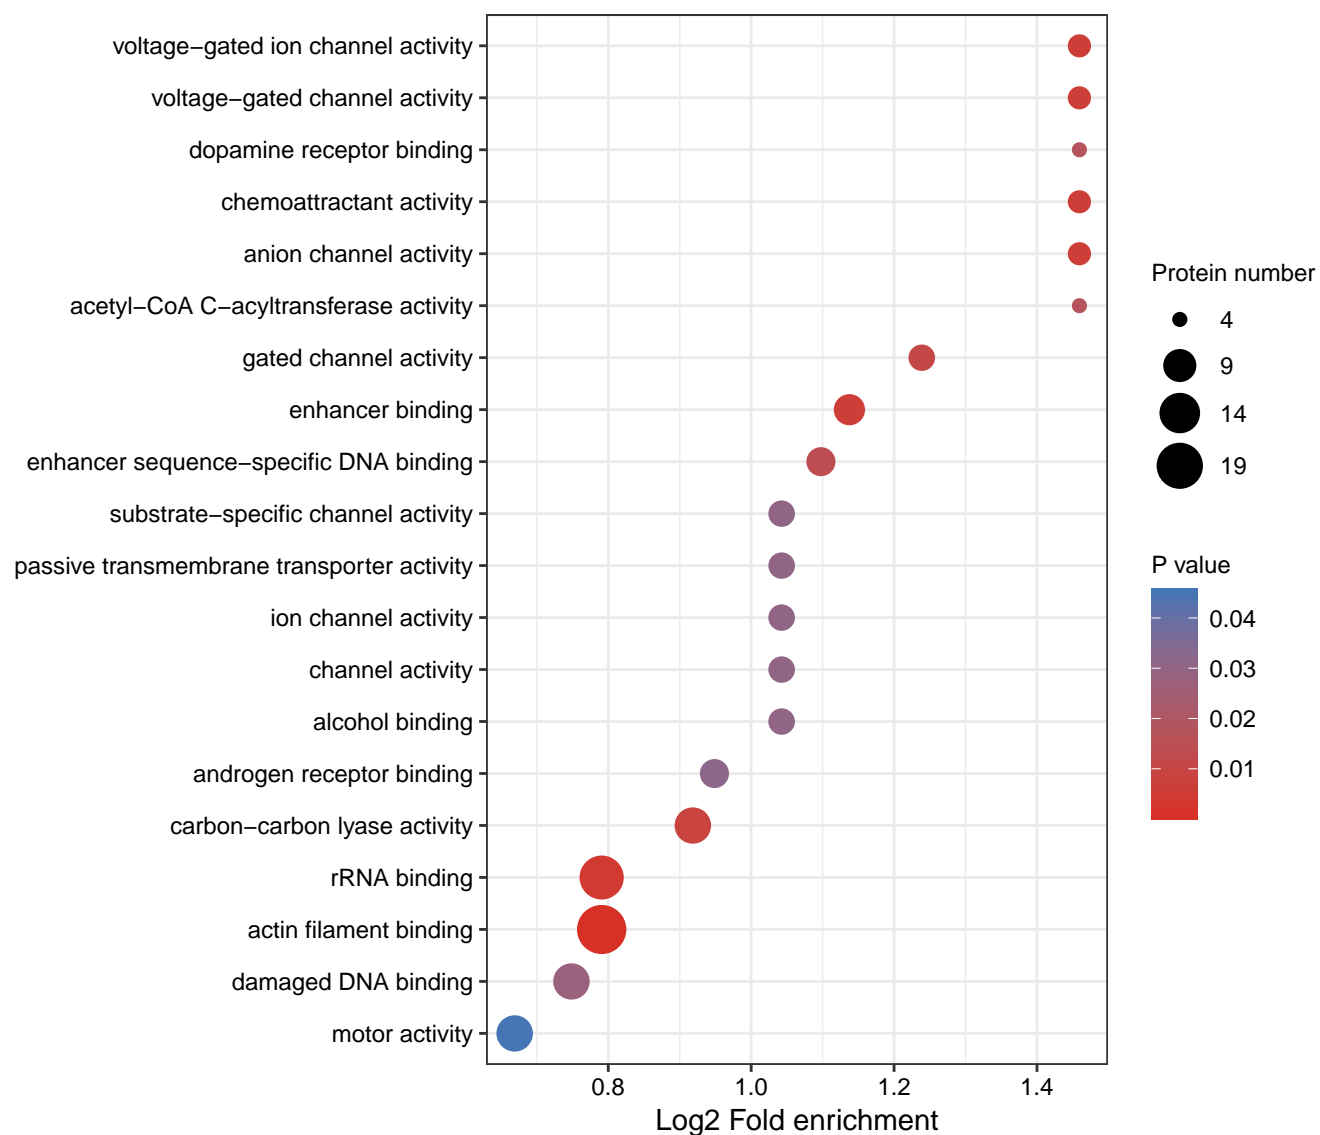

Supplement: Raw_Data.zip [file Raw_Data.zip]

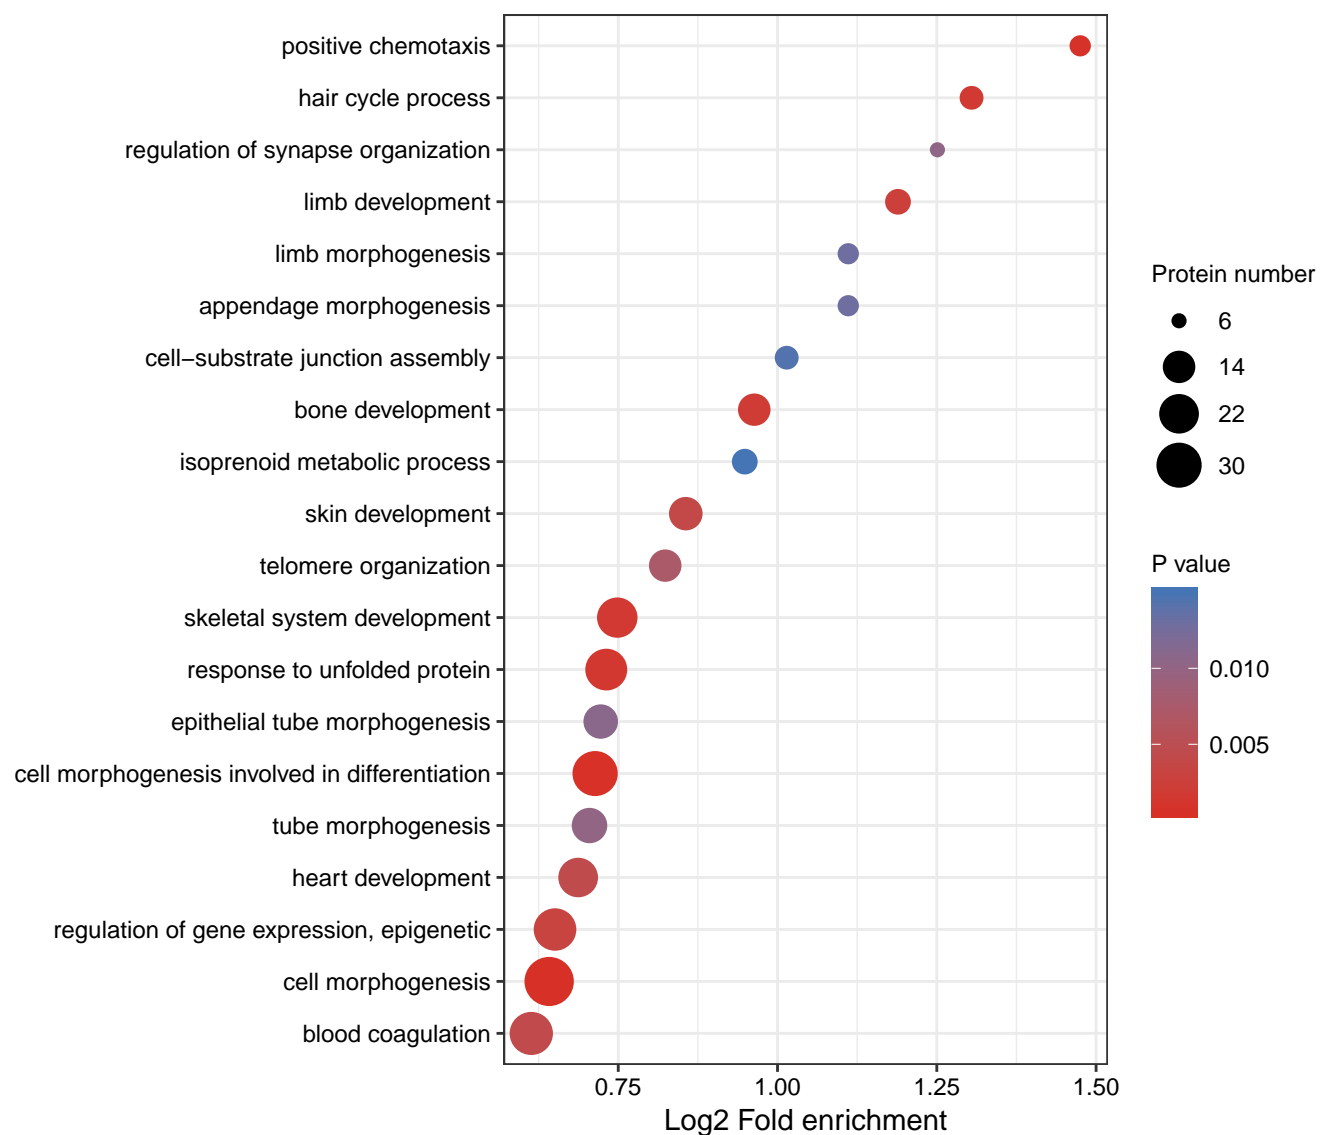

Supplement: Raw_Data.zip [file Raw_Data.zip]

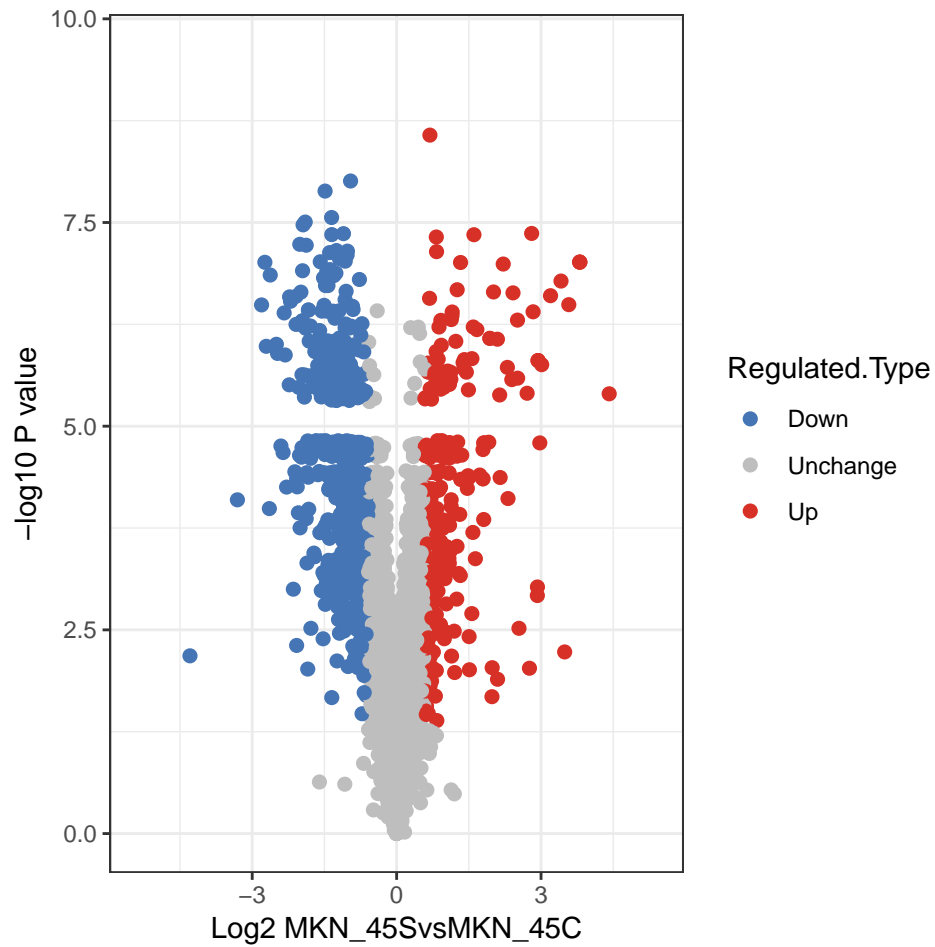

Supplement: Raw_Data.zip [file Raw_Data.zip]

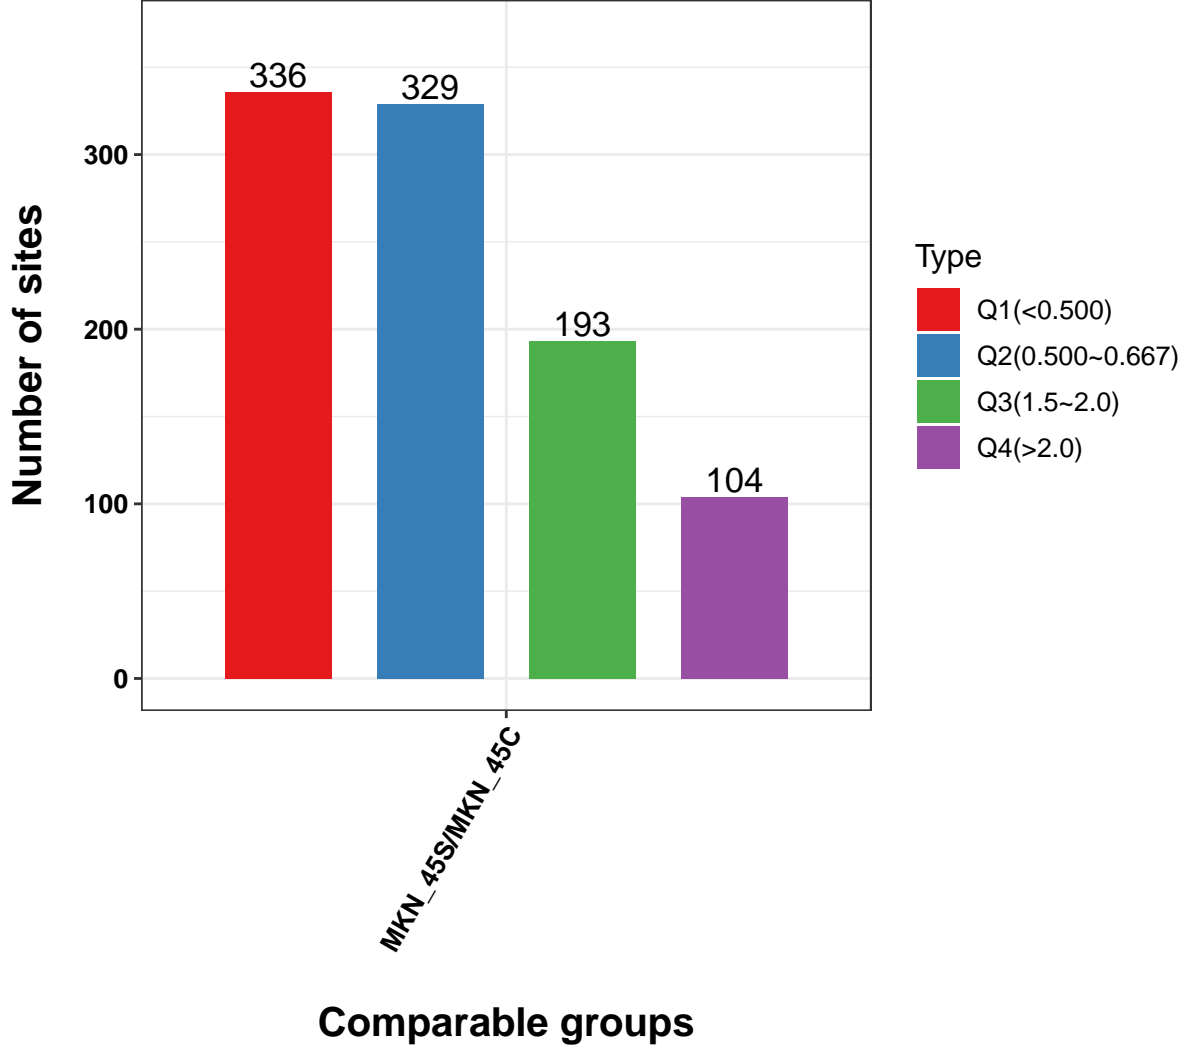

Supplement: Raw_Data.zip [file Raw_Data.zip]

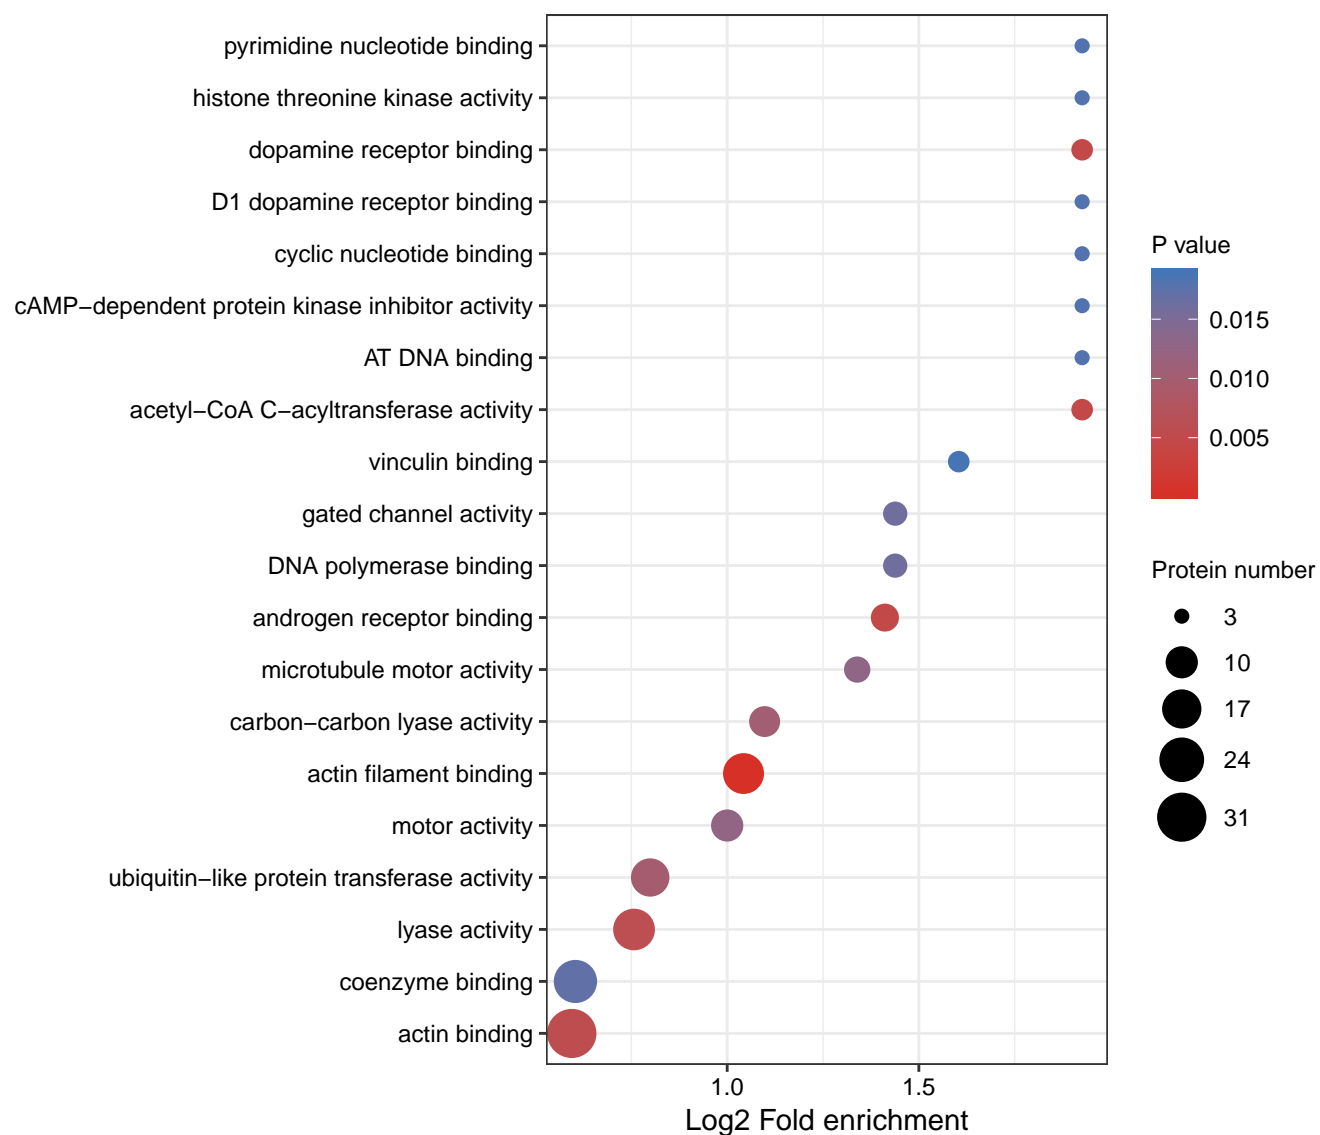

Supplement: Raw_Data.zip [file Raw_Data.zip]
